# Supplementary material for: Molecular Landscape of Tourette’s Disorder
Source: MDPI journal article supplement (doi:10.3390/ijms24021428), 2023-01-11
Supplement: s1 [file s1]

Inf the inputed 233 genes,  
167 genes exist in the brain cell type expression dataset, 66 genes do not, which are:  
PGAP1, MIR663B, KLRB1, AGBL1, RNU7-7PIL26, EPB41L4B, MIR1252, RFPL1, SIAH3, HHIPL2, CHAT, HIPK4, NWD2, ALKAL2, MC4R, OLFM4, LINC01705, STRIP2, DLX6-AS1, KIR3DX1, SLC10A4, MIR199B, MIR1298, TAC3, SNORA35, LINC00523, PRSS35, DRD1, MIR153-2, CST1, ERICH3, OBSCN-AS1, CST4, DCHS2, DIRAS3, RIMBP2, TINCRC, PNMA8A, SERTM1, SIRPB1, CHRM2, NAT16, ASIC2, CST2, MIR764, MXRA5, PHF24, ATP2B3, SLC27A6, KIAA0087, RNVU1-18, MIR1912, MIR1911, SLC17A8, DRD5, HCN4, AZU1, CACNG8, RXFP1, RNU5B-3P, GNRH1, LINC00269, C11ORF87, MIR448, RADX

**Interpretation of CSEA results table:**  
The first row lists the pSI thresholds, and the first column lists the brain cell types  
The values in the tables are the Fisher's Exact p-values, followed by the Benjamini-Hochberg (BH) corrected values in parentheses.  
Click the linked p-values to see the overlapped genes for the corresponding brain cell types and thresholds.

| Brain Cell Types and P-Values | 0.05                                   | 0.01                                   | 0.001                                  | 0.0001                                 |
|-------------------------------|----------------------------------------|----------------------------------------|----------------------------------------|----------------------------------------|
| RetR.Rods                     | <a href="#">0.696</a> ( 0.761)         | <a href="#">0.313</a> ( 0.438)         | <a href="#">0.336</a> ( 0.657)         | <a href="#">0.590</a> ( 0.938)         |
| Hyp                           | <a href="#">1.080e-05</a> ( 4.199e-05) | <a href="#">0.039</a> ( 0.103)         | <a href="#">0.004</a> ( 0.031)         | <a href="#">0.150</a> ( 0.584)         |
| Hyp.Hort                      | <a href="#">0.112</a> ( 0.178)         | <a href="#">0.069</a> ( 0.151)         | <a href="#">0.546</a> ( 0.778)         | <a href="#">0.417</a> ( 0.729)         |
| BF                            | <a href="#">1.789e-07</a> ( 1.565e-06) | <a href="#">1.059e-06</a> ( 9.269e-06) | <a href="#">0.107</a> ( 0.405)         | <a href="#">1.000</a> ( 1.000)         |
| BF.Chat                       | <a href="#">5.368e-09</a> ( 6.262e-08) | <a href="#">1.650e-07</a> ( 1.925e-06) | <a href="#">1.064e-05</a> ( 1.861e-04) | <a href="#">6.233e-06</a> ( 1.091e-04) |
| BS                            | <a href="#">0.070</a> ( 0.122)         | <a href="#">0.085</a> ( 0.174)         | <a href="#">1.000</a> ( 1.000)         | <a href="#">1.000</a> ( 1.000)         |
| BS.Chat                       | <a href="#">0.095</a> ( 0.158)         | <a href="#">0.109</a> ( 0.212)         | <a href="#">0.585</a> ( 0.778)         | <a href="#">0.394</a> ( 0.727)         |
| BS.Slc6a4                     | <a href="#">7.837e-04</a> ( 0.002)     | <a href="#">0.505</a> ( 0.589)         | <a href="#">1.000</a> ( 1.000)         | <a href="#">1.000</a> ( 1.000)         |
| Cb                            | <a href="#">0.190</a> ( 0.277)         | <a href="#">0.483</a> ( 0.583)         | <a href="#">0.387</a> ( 0.657)         | <a href="#">0.150</a> ( 0.584)         |
| Cb.Septin4                    | <a href="#">0.572</a> ( 0.646)         | <a href="#">0.330</a> ( 0.444)         | <a href="#">0.390</a> ( 0.657)         | <a href="#">0.498</a> ( 0.831)         |
| Cb.Pcp2                       | <a href="#">0.478</a> ( 0.597)         | <a href="#">0.409</a> ( 0.511)         | <a href="#">0.394</a> ( 0.657)         | <a href="#">0.295</a> ( 0.722)         |
| Cb.Neurod1                    | <a href="#">0.305</a> ( 0.427)         | <a href="#">0.240</a> ( 0.381)         | <a href="#">0.092</a> ( 0.405)         | <a href="#">1.000</a> ( 1.000)         |
| Cb.Lypd6                      | <a href="#">0.046</a> ( 0.094)         | <a href="#">0.010</a> ( 0.037)         | <a href="#">0.024</a> ( 0.141)         | <a href="#">0.011</a> ( 0.094)         |
| Cb.Grp                        | <a href="#">0.059</a> ( 0.109)         | <a href="#">0.021</a> ( 0.068)         | <a href="#">0.387</a> ( 0.657)         | <a href="#">0.241</a> ( 0.722)         |
| Cb.Grm2                       | <a href="#">0.053</a> ( 0.103)         | <a href="#">1.000</a> ( 1.000)         | <a href="#">1.000</a> ( 1.000)         | <a href="#">1.000</a> ( 1.000)         |
| Cb.Fthfd                      | <a href="#">0.532</a> ( 0.620)         | <a href="#">0.602</a> ( 0.680)         | <a href="#">0.267</a> ( 0.623)         | <a href="#">0.322</a> ( 0.722)         |
| Cb.Cnp                        | <a href="#">1.000</a> ( 1.000)         |
| Cpu                           | <a href="#">3.976e-04</a> ( 0.001)     | <a href="#">0.171</a> ( 0.286)         | <a href="#">1.000</a> ( 1.000)         | <a href="#">1.000</a> ( 1.000)         |
| Cpu.D2                        | <a href="#">0.332</a> ( 0.447)         | <a href="#">0.155</a> ( 0.271)         | <a href="#">0.558</a> ( 0.778)         | <a href="#">0.330</a> ( 0.722)         |
| Cpu.D1                        | <a href="#">0.027</a> ( 0.060)         | <a href="#">0.065</a> ( 0.151)         | <a href="#">0.149</a> ( 0.405)         | <a href="#">0.260</a> ( 0.722)         |
| Cpu.Chat                      | <a href="#">3.014e-06</a> ( 1.318e-05) | <a href="#">5.910e-08</a> ( 1.775e-06) | <a href="#">1.241e-06</a> ( 4.345e-05) | <a href="#">2.351e-06</a> ( 8.230e-05) |
| Ctx                           | <a href="#">5.333e-07</a> ( 3.702e-06) | <a href="#">5.730e-06</a> ( 3.342e-05) | <a href="#">1.000</a> ( 1.000)         | <a href="#">1.000</a> ( 1.000)         |
| Ctx.Pdgfrjd340                | <a href="#">0.892</a> ( 0.946)         | <a href="#">1.000</a> ( 1.000)         | <a href="#">1.000</a> ( 1.000)         | <a href="#">1.000</a> ( 1.000)         |
| Ctx.Etv1_ts88                 | <a href="#">6.346e-07</a> ( 3.702e-06) | <a href="#">0.041</a> ( 0.103)         | <a href="#">0.194</a> ( 0.484)         | <a href="#">0.371</a> ( 0.722)         |
| Ctx.Pnoc                      | <a href="#">2.667e-06</a> ( 1.318e-05) | <a href="#">0.001</a> ( 0.006)         | <a href="#">0.001</a> ( 0.013)         | <a href="#">6.176e-05</a> ( 7.205e-04) |
| Ctx.Ntsr                      | <a href="#">1.221e-14</a> ( 4.273e-13) | <a href="#">1.014e-07</a> ( 1.775e-06) | <a href="#">0.150</a> ( 0.405)         | <a href="#">1.000</a> ( 1.000)         |
| Ctx.Glt25d2                   | <a href="#">2.022e-11</a> ( 3.539e-10) | <a href="#">1.698e-06</a> ( 1.189e-05) | <a href="#">0.150</a> ( 0.405)         | <a href="#">1.000</a> ( 1.000)         |
| Ctx.Fthfd                     | <a href="#">0.516</a> ( 0.620)         | <a href="#">0.305</a> ( 0.438)         | <a href="#">0.377</a> ( 0.657)         | <a href="#">1.000</a> ( 1.000)         |
| Ctx.Cort                      | <a href="#">7.461e-04</a> ( 0.002)     | <a href="#">6.429e-04</a> ( 0.003)     | <a href="#">0.019</a> ( 0.130)         | <a href="#">0.072</a> ( 0.395)         |
| Ctx.Cnp                       | <a href="#">1.000</a> ( 1.000)         |
| Epi                           | <a href="#">0.001</a> ( 0.003)         | <a href="#">0.149</a> ( 0.271)         | <a href="#">0.459</a> ( 0.730)         | <a href="#">0.289</a> ( 0.722)         |
| Epi.Chat                      | <a href="#">0.004</a> ( 0.010)         | <a href="#">0.020</a> ( 0.068)         | <a href="#">0.143</a> ( 0.405)         | <a href="#">0.057</a> ( 0.395)         |
| Spc                           | <a href="#">0.358</a> ( 0.465)         | <a href="#">0.307</a> ( 0.438)         | <a href="#">0.505</a> ( 0.768)         | <a href="#">0.296</a> ( 0.722)         |
| Spc.Chat                      | <a href="#">0.006</a> ( 0.013)         | <a href="#">0.040</a> ( 0.103)         | <a href="#">0.600</a> ( 0.778)         | <a href="#">0.363</a> ( 0.722)         |
| RetC.Cones                    | <a href="#">0.188</a> ( 0.277)         | <a href="#">0.344</a> ( 0.446)         | <a href="#">0.129</a> ( 0.405)         | <a href="#">0.079</a> ( 0.395)         |

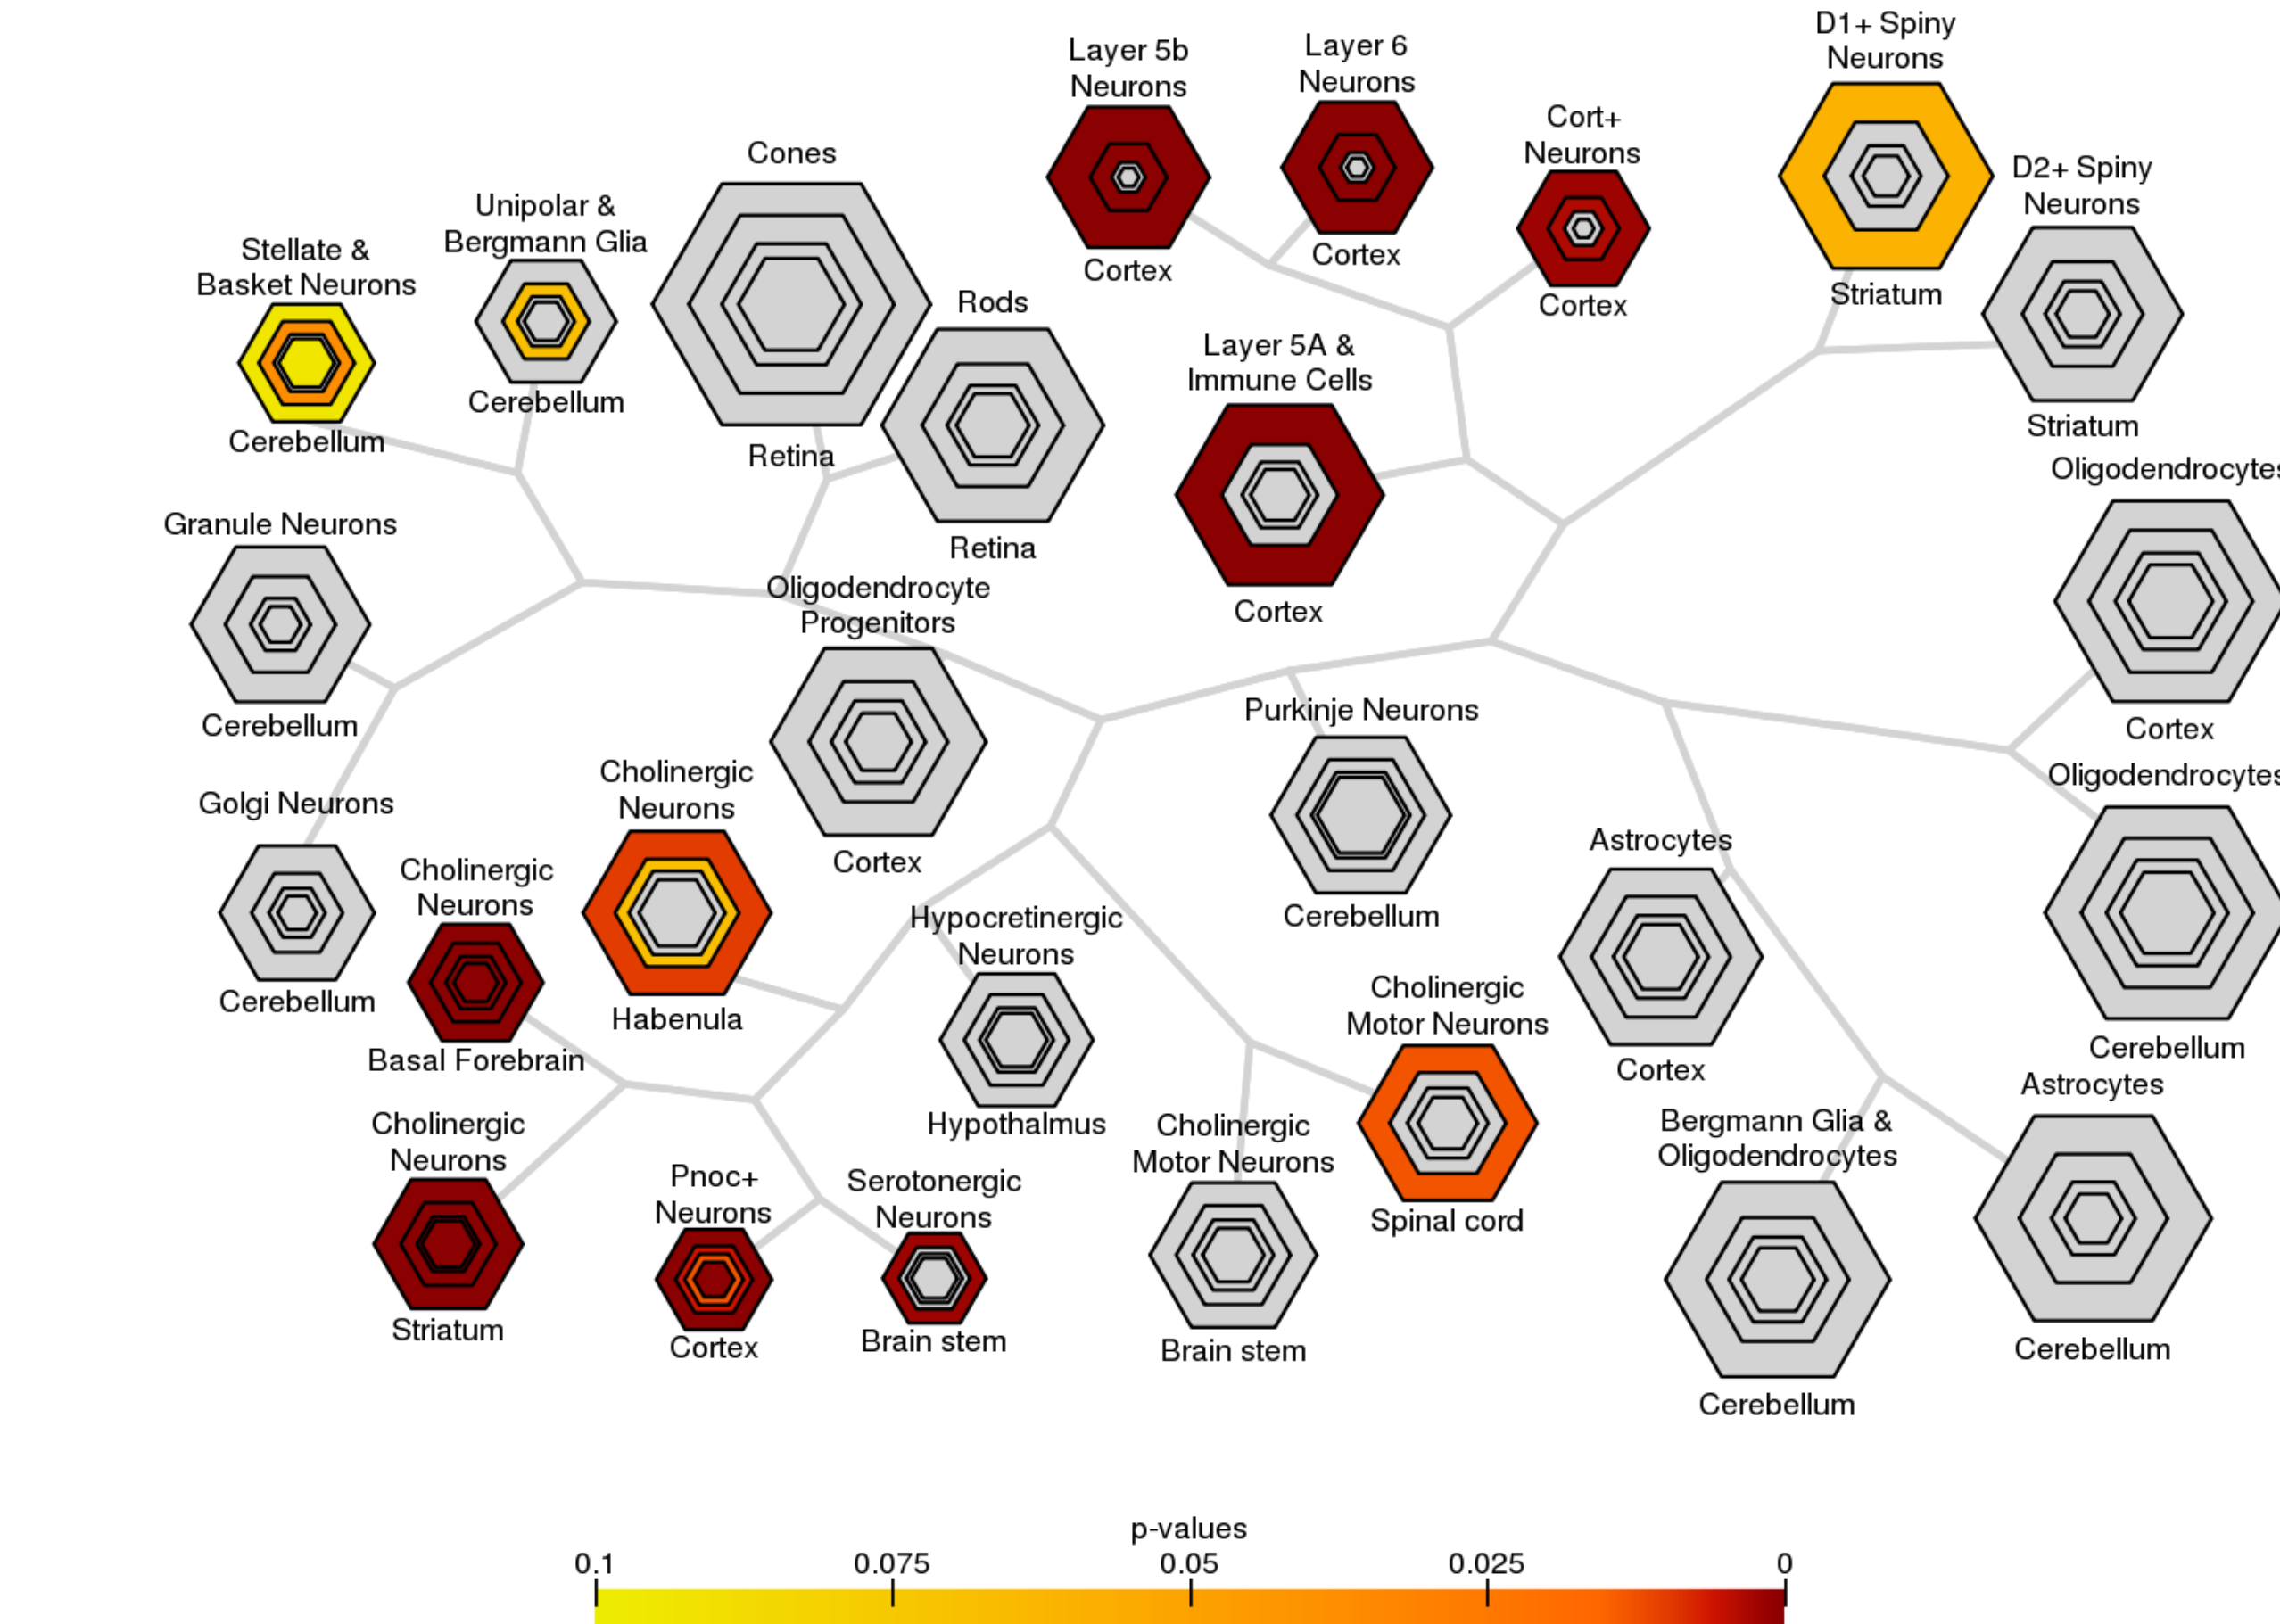

**The overlapped genes for every cell type ( pSI threshold 0.05 ) are:**

RetR.Rods : NT5E, C1QL2, COL20A1, PLCH1, CRABP1, SLC17A7  
Hyp : NNAT, PNOC, C1QL2, NPY2R, MAGEL2, KANK4, ECEL1, SST, DGKK, PRLR, GPR101, GBX2, ADCYAP1  
Hyp.Hort : NNAT, ZCCHC12, RESP18, VGF, DGKK, RAB27B  
BF : LHX8, GJB2, PCDH8, PNOC, NPY2R, OPRK1, ZCCHC12, GPR83, HTR2C, SST, GPR101, GDA, CRYM, CRH, AKAP5  
BF.Chat : LHX8, PCDH8, GNG2, NTRK1, SLC18A3, KANK4, RESP18, GPR83, ECEL1, DGKK, TRPC3, GBX2, ELAVL2, CRABP1, SLC7A14, SLC5A7  
BS : GJB2, SLC27A2, KANK4, TTR, SOSTDC1, CRH  
BS.Chat : SLIT3, ECEL1, LCN2, SLC18A3, ADCYAP1, SLC7A14, SLC5A7  
BS.Slc6a4 : CBLN4, GNG2, SLC27A2, RESP18, DGKK, ADCYAP1, CRH  
Cb : NEUROD2, GPCPD1, CASQ2, TTR, KIT, TRPC3, FAT2, HCN1, DIRAS2  
Cb.Septin4 : COLEC12, DIO2, NPY, P2RY1, BTBD17, WIF1, GPD1  
Cb.Pcp2 : NPTX1, FOXQ1, TRPC3, CACNA2D2, CASQ2  
Cb.Neurod1 : NEUROD2, SYT2, FOS, FAT2, SPHKAP, DIRAS2  
Cb.Lypd6 : GABRA1, CDH1, KIT, HCN1, PLCH1, SORCS3  
Cb.Grp : NNAT, BTBD17, TRPC3, WIF1, ADCYAP1, NEUROD6  
Cb.Grm2 : PNOC, SYT13, MAGEL2, FGF12, GAD1, KIT, ELAVL2  
Cb.Fthfd : DIO2, NPY, COLEC12, TTR, BTBD17, HES1, WIF1, GPD1  
Cb.Cnp : none  
Cpu : LHX8, NT5E, GPR83, SH3RF2, SH2D5, GRIN2B, CRYM, SST, SEZ6, CRABP1, AKAP5  
Cpu.D2 : LHX8, NT5E, SH3RF2, SH2D5, SLITRK5, ICAM5, AKAP5  
Cpu.D1 : SH3RF2, SH2D5, ENC1, GRIN2B, CRYM, SLITRK5, ICAM5, MPPED1, SEZ6, RASGRP1, AKAP5, FREM2  
Cpu.Chat : LHX8, GPR83, NTRK1, WIF1, FGF12, ECEL1, DGKK, TRPC6, TRPC3, GBX2, SLC18A3, CRABP1, SLC7A14, SLC5A7  
Ctx : CCK, NPY, PDE1A, NPAS4, TRHDE, RASAL1, GDA, MPPED1, PGM2L1, SYT16, VIP, ENC1, TBR1, NEUROD6  
Ctx.Pdgfrjd340 : SEMA5A, HES1, NR4A1, C1QL2  
Ctx.Etv1\_ts88 : NPAS4, SLC17A7, SLIT3, NPTX1, PDE1A, RASGRP1, L1CAM, CASQ2, CLSTN2, SLC22A8, ICAM5, GDA, MPPED1, RASAL1, ITIH2, ISLR, NEUROD6, ENC1, TBR1, SORCS3, MOXD1  
Ctx.Pnoc : CCK, GNG2, NPY, SYT1, SST, KIT, PNOC, CRABP1, CRH, VIP, NEUROD6  
Ctx.Ntsr : GABRG2, SLC4A10, ICAM5, CPNE4, SLIT3, RASGRP1, BTG2, RASAL1, ISLR, TBR1, NEUROD6, CDHR1, PCDH8, NR4A2, PDE1A, GPR101, SYT16, CBLN4, SV2B, NPTX1, NPY2R, CLSTN2, SORCS3, MOXD1  
Ctx.Glt25d2 : SLC17A7, ENC1, ICAM5, MPPED1, NPAS4, SLIT3, UNC13A, SYT1, RASGRP1, GDA, RASAL1, ADCYAP1, ISLR, PDE1A, AKAP5, SV2B, CCK, KLF2, CRYM, SLC22A8, SORCS3, MOXD1  
Ctx.Fthfd : DIO2, CHRD1, BTBD17, FAM163A, HES1, ISLR  
Ctx.Cort : NPY, SLC4A10, SST, TRHDE, CLSTN2, TRPC6, ICAM5, CRH, MOXD1  
Ctx.Cnp : RASAL1  
Epi : CBLN4, WIF1, SEMA5A, ZCCHC12, HTR2C, FAM163A, SOSTDC1, GBX2, CPNE4, CCDC141, CDH8  
Epi.Chat : CBLN4, NR4A2, CBLN4, PDE1A, SEMA5A, SOSTDC1, FAM163A, CPNE4, CCDC141, CDH8, SLC5A7  
Spc : SEMA5A, GPCPD1, GJB2, SLC27A2, KANK4, MPZ, HTR2C, GPR101  
Spc.Chat : CDHR1, PNOC, C1QL2, SYT2, ECEL1, LCN2, SLIT3, SLC18A3, SLC7A14, SEMA3A, SLC5A7  
RetC.Cones : CDHR1, SV2B, DIO2, GPCPD1, GABRA3, UNC13A, KLF2, SYT1, MYOCD, HCN1, CRYM, BTG2, SPHKAP, MOXD1

**The overlapped genes for every cell type ( pSI threshold 0.01 ) are:**

RetR.Rods : C1QL2, NT5E, SLC17A7, PLCH1  
Hyp : PRLR, GPR101, MAGEL2  
Hyp.Hort : NNAT, ZCCHC12, VGF, RESP18  
BF : LHX8, NPY2R, OPRK1, HTR2C, GPR101, CRYM, CRH  
BF.Chat : LHX8, NTRK1, ECEL1, DGKK, TRPC3, GBX2, SLC18A3, CRABP1, SLC7A14, SLC5A7  
BS : KANK4, TTR  
BS.Chat : SLC7A14, ECEL1, SLC18A3, LCN2  
BS.Slc6a4 : DGKK  
Cb : KIT, FAT2  
Cb.Septin4 : P2RY1, GPD1, WIF1, BTBD17  
Cb.Pcp2 : CASQ2, FOXQ1, TRPC3  
Cb.Neurod1 : NEUROD2, SYT2, FAT2  
Cb.Lypd6 : CDH1, KIT, HCN1, PLCH1, SORCS3  
Cb.Grp : NNAT, TRPC3, WIF1, BTBD17  
Cb.Grm2 : none  
Cb.Fthfd : COLEC12, WIF1, BTBD17  
Cb.Cnp : none  
Cpu : none  
Cpu.D2 : SH3RF2, AKAP5  
Cpu.D1 : SLITRK5, SH3RF2, AKAP5, SH2D5, FREM2  
Cpu.Chat : LHX8, GPR83, SLC7A14, ECEL1, TRPC6, TRPC3, GBX2, SLC18A3, CRABP1, NTRK1, SLC5A7  
Ctx : MPPED1, GDA, SYT16, NPAS4, VIP, TBR1  
Ctx.Pdgfrjd340 : none  
Ctx.Etv1\_ts88 : RASAL1, NPAS4, ISLR, TBR1, CLSTN2  
Ctx.Pnoc : VIP, CRH, PNOC, SYT1, NPY  
Ctx.Ntsr : CDHR1, NPY2R, GPR101, ICAM5, RASAL1, ISLR, MOXD1, TBR1, NEUROD6  
Ctx.Glt25d2 : SV2B, PDE1A, UNC13A, CRYM, ICAM5, MPPED1, NPAS4, SORCS3  
Ctx.Fthfd : FAM163A, CHRD1, DIO2, BTBD17  
Ctx.Cort : MOXD1, SST, TRPC6, CLSTN2, NPY  
Ctx.Cnp : none  
Epi : GBX2  
Epi.Chat : SOSTDC1, CBLN4, NR4A2  
Spc : MPZ  
Spc.Chat : LCN2  
RetC.Cones : CDHR1, BTG2, MYOCD, SYT1, MOXD1

**The overlapped genes for every cell type ( pSI threshold 0.001 ) are:**

RetR.Rods : NT5E, SLC17A7  
Hyp : PRLR, GPR101, MAGEL2  
Hyp.Hort : NNAT  
BF : NPY2R  
BF.Chat : LHX8, ECEL1, GBX2, CRABP1, NTRK1, SLC5A7  
BS : none  
BS.Chat : SLC18A3  
BS.Slc6a4 : none  
Cb : FAT2  
Cb.Septin4 : WIF1, BTBD17  
Cb.Pcp2 : CASQ2, FOXQ1  
Cb.Neurod1 : NEUROD2, FAT2  
Cb.Lypd6 : CDH1, KIT, PLCH1  
Cb.Grp : NNAT  
Cb.Grm2 : none  
Cb.Fthfd : COLEC12, BTBD17  
Cb.Cnp : none  
Cpu : none  
Cpu.D2 : SH3RF2  
Cpu.D1 : SH3RF2  
Cpu.Chat : LHX8, NTRK1, ECEL1, TRPC3, SLC18A3, SLC7A14, SLC5A7  
Ctx : none  
Ctx.Pdgfrjd340 : none  
Ctx.Etv1\_ts88 : ISLR, TBR1  
Ctx.Pnoc : CRH, VIP, PNOC, NPY  
Ctx.Ntsr : none  
Ctx.Glt25d2 : MPPED1  
Ctx.Fthfd : DIO2, BTBD17  
Ctx.Cort : SST, MOXD1  
Ctx.Cnp : none  
Epi : GBX2  
Epi.Chat : SOSTDC1, CBLN4, NR4A2  
Spc : MPZ  
Spc.Chat : LCN2  
RetC.Cones : CDHR1, BTG2, MYOCD, SYT1, MOXD1

**The overlapped genes for every cell type ( pSI threshold 0.0001 ) are:**

RetR.Rods : NT5E  
Hyp : GPR101  
Hyp.Hort : NNAT  
BF : none  
BF.Chat : LHX8, CRABP1, NTRK1, ECEL1, SLC5A7  
BS : none  
BS.Chat : SLC18A3  
BS.Slc6a4 : none  
Cb : FAT2  
Cb.Septin4 : WIF1  
Cb.Pcp2 : CASQ2, FOXQ1  
Cb.Neurod1 : none  
Cb.Lypd6 : CDH1, KIT, PLCH1  
Cb.Grp : NNAT  
Cb.Grm2 : none  
Cb.Fthfd : BTBD17  
Cb.Cnp : none  
Cpu : none  
Cpu.D2 : SH3RF2  
Cpu.D1 : SH3RF2  
Cpu.Chat : LHX8, NTRK1, ECEL1, TRPC3, SLC18A3, SLC7A14  
Ctx : none  
Ctx.Pdgfrjd340 : none  
Ctx.Etv1\_ts88 : TBR1  
Ctx.Pnoc : CRH, VIP, PNOC, NPY  
Ctx.Ntsr : none  
Ctx.Glt25d2 : none  
Ctx.Fthfd : none  
Ctx.Cort : SST  
Ctx.Cnp : none  
Epi : GBX2  
Epi.Chat : CBLN4, SOSTDC1, NR4A2  
Spc : MPZ  
Spc.Chat : LCN2  
RetC.Cones : CDHR1, MYOCD, SYT1, BTG2
