# Supplementary material for: Molecular Landscape of Tourette’s Disorder
Source: MDPI journal article supplement (doi:10.3390/ijms24021428), 2023-01-11
Supplement: s1 [file s1]

**Interpretation of CSEA results table:**

The first row lists the pSI thresholds, and the first column lists the brain cell types

The values in the tables are the Fisher's Exact p-values, followed by the Benjamini-Hochberg (BH) corrected values in parentheses

Click the linked p-values to see the overlapped genes for the corresponding cell types and thresholds.

| Brain Cell Types and P-Values | 0.01                                                    | 0.001 | 0.0001 |
|-------------------------------|---------------------------------------------------------|-------|--------|
| Repl.Rods                     | 0.678 (0.999) 0.834 (1.000) 0.942 (1.000) 0.849 (1.000) |       |        |
| HyR                           | 0.997 (0.999) 0.943 (1.000) 1.000 (1.000) 1.000 (1.000) |       |        |
| HyP-Hcrt                      | 0.959 (0.999) 0.981 (1.000) 0.951 (1.000) 0.871 (1.000) |       |        |
| HyP                           | 0.632 (0.999) 0.877 (1.000) 0.754 (1.000) 0.894 (1.000) |       |        |
| Bf-Chat                       | 0.743 (0.999) 0.796 (1.000) 0.575 (1.000) 0.273 (1.000) |       |        |
| BS                            | 0.517 (0.999) 0.272 (1.000) 0.039 (1.000) 1.000 (1.000) |       |        |
| BS-Chat                       | 0.594 (0.999) 0.815 (1.000) 0.638 (1.000) 0.284 (1.000) |       |        |
| BS-Slc6a4                     | 0.495 (0.999) 0.741 (1.000) 0.793 (1.000) 0.681 (1.000) |       |        |
| Cb                            | 0.948 (0.999) 0.998 (1.000) 1.000 (1.000) 1.000 (1.000) |       |        |
| Cb Septin4                    | 0.723 (0.999) 0.854 (1.000) 0.884 (1.000) 0.927 (1.000) |       |        |
| Cb-Pu2                        | 0.726 (0.999) 0.788 (1.000) 0.754 (1.000) 0.894 (1.000) |       |        |
| Cb-Neurod1                    | 0.810 (0.999) 0.764 (1.000) 0.858 (1.000) 1.000 (1.000) |       |        |
| Cb-Lyph6                      | 0.503 (0.999) 0.719 (1.000) 0.683 (1.000) 0.829 (1.000) |       |        |
| Cb-Grp                        | 0.998 (0.999) 1.000 (1.000) 1.000 (1.000) 1.000 (1.000) |       |        |
| Cb-Grm2                       | 0.495 (0.999) 0.625 (1.000) 0.489 (1.000) 0.555 (1.000) |       |        |
| Cb-Fhlh6                      | 0.942 (0.999) 0.948 (1.000) 0.979 (1.000) 1.000 (1.000) |       |        |
| Cb-Cnp                        | 0.959 (0.999) 0.915 (1.000) 0.821 (1.000) 0.719 (1.000) |       |        |
| Cpu                           | 0.151 (0.999) 0.304 (1.000) 0.004 (1.000) 0.004 (1.000) |       |        |
| Cpu D2                        | 0.007 (0.160) 0.048 (0.836) 0.598 (1.000) 0.442 (1.000) |       |        |
| Cpu D1                        | 0.441 (0.999) 0.285 (1.000) 0.732 (1.000) 1.000 (1.000) |       |        |
| Cpu-Chat                      | 0.192 (0.999) 0.526 (1.000) 0.349 (1.000) 0.442 (1.000) |       |        |
| Ctx                           | 0.428 (0.999) 0.519 (1.000) 1.000 (1.000) 1.000 (1.000) |       |        |
| Cx-PdgfraJ340                 | 0.992 (0.999) 0.992 (1.000) 0.993 (1.000) 1.000 (1.000) |       |        |
| Cx-Env1_ts88                  | 0.452 (0.999) 0.715 (1.000) 0.968 (1.000) 0.518 (1.000) |       |        |
| Cx-Pnc                        | 0.284 (0.999) 0.081 (0.943) 0.246 (1.000) 0.106 (1.000) |       |        |
| Cx-Ntr                        | 0.009 (0.160) 0.812 (1.000) 0.999 (1.000) 1.000 (1.000) |       |        |
| Cx-Gli25d2                    | 0.067 (0.786) 0.035 (0.836) 0.120 (1.000) 1.000 (1.000) |       |        |
| Cx-Fhlh6                      | 0.984 (0.999) 0.823 (1.000) 0.872 (1.000) 1.000 (1.000) |       |        |
| Cx-Cort                       | 0.122 (0.999) 0.486 (1.000) 0.555 (1.000) 1.000 (1.000) |       |        |
| Cx-Cnp                        | 0.952 (0.999) 0.996 (1.000) 0.886 (1.000) 0.879 (1.000) |       |        |
| Cx-Grp                        | 0.732 (0.999) 0.880 (1.000) 0.951 (1.000) 1.000 (1.000) |       |        |
| Env-Chat                      | 0.758 (0.999) 0.544 (1.000) 0.363 (1.000) 0.106 (1.000) |       |        |
| SpC                           | 0.970 (0.999) 0.978 (1.000) 1.000 (1.000) 1.000 (1.000) |       |        |
| Cx-Cone                       | 0.794 (0.999) 0.925 (1.000) 0.969 (1.000) 0.820 (1.000) |       |        |
| Ret.C-Chat                    | 0.828 (0.999) 0.862 (1.000) 0.973 (1.000) 0.860 (1.000) |       |        |

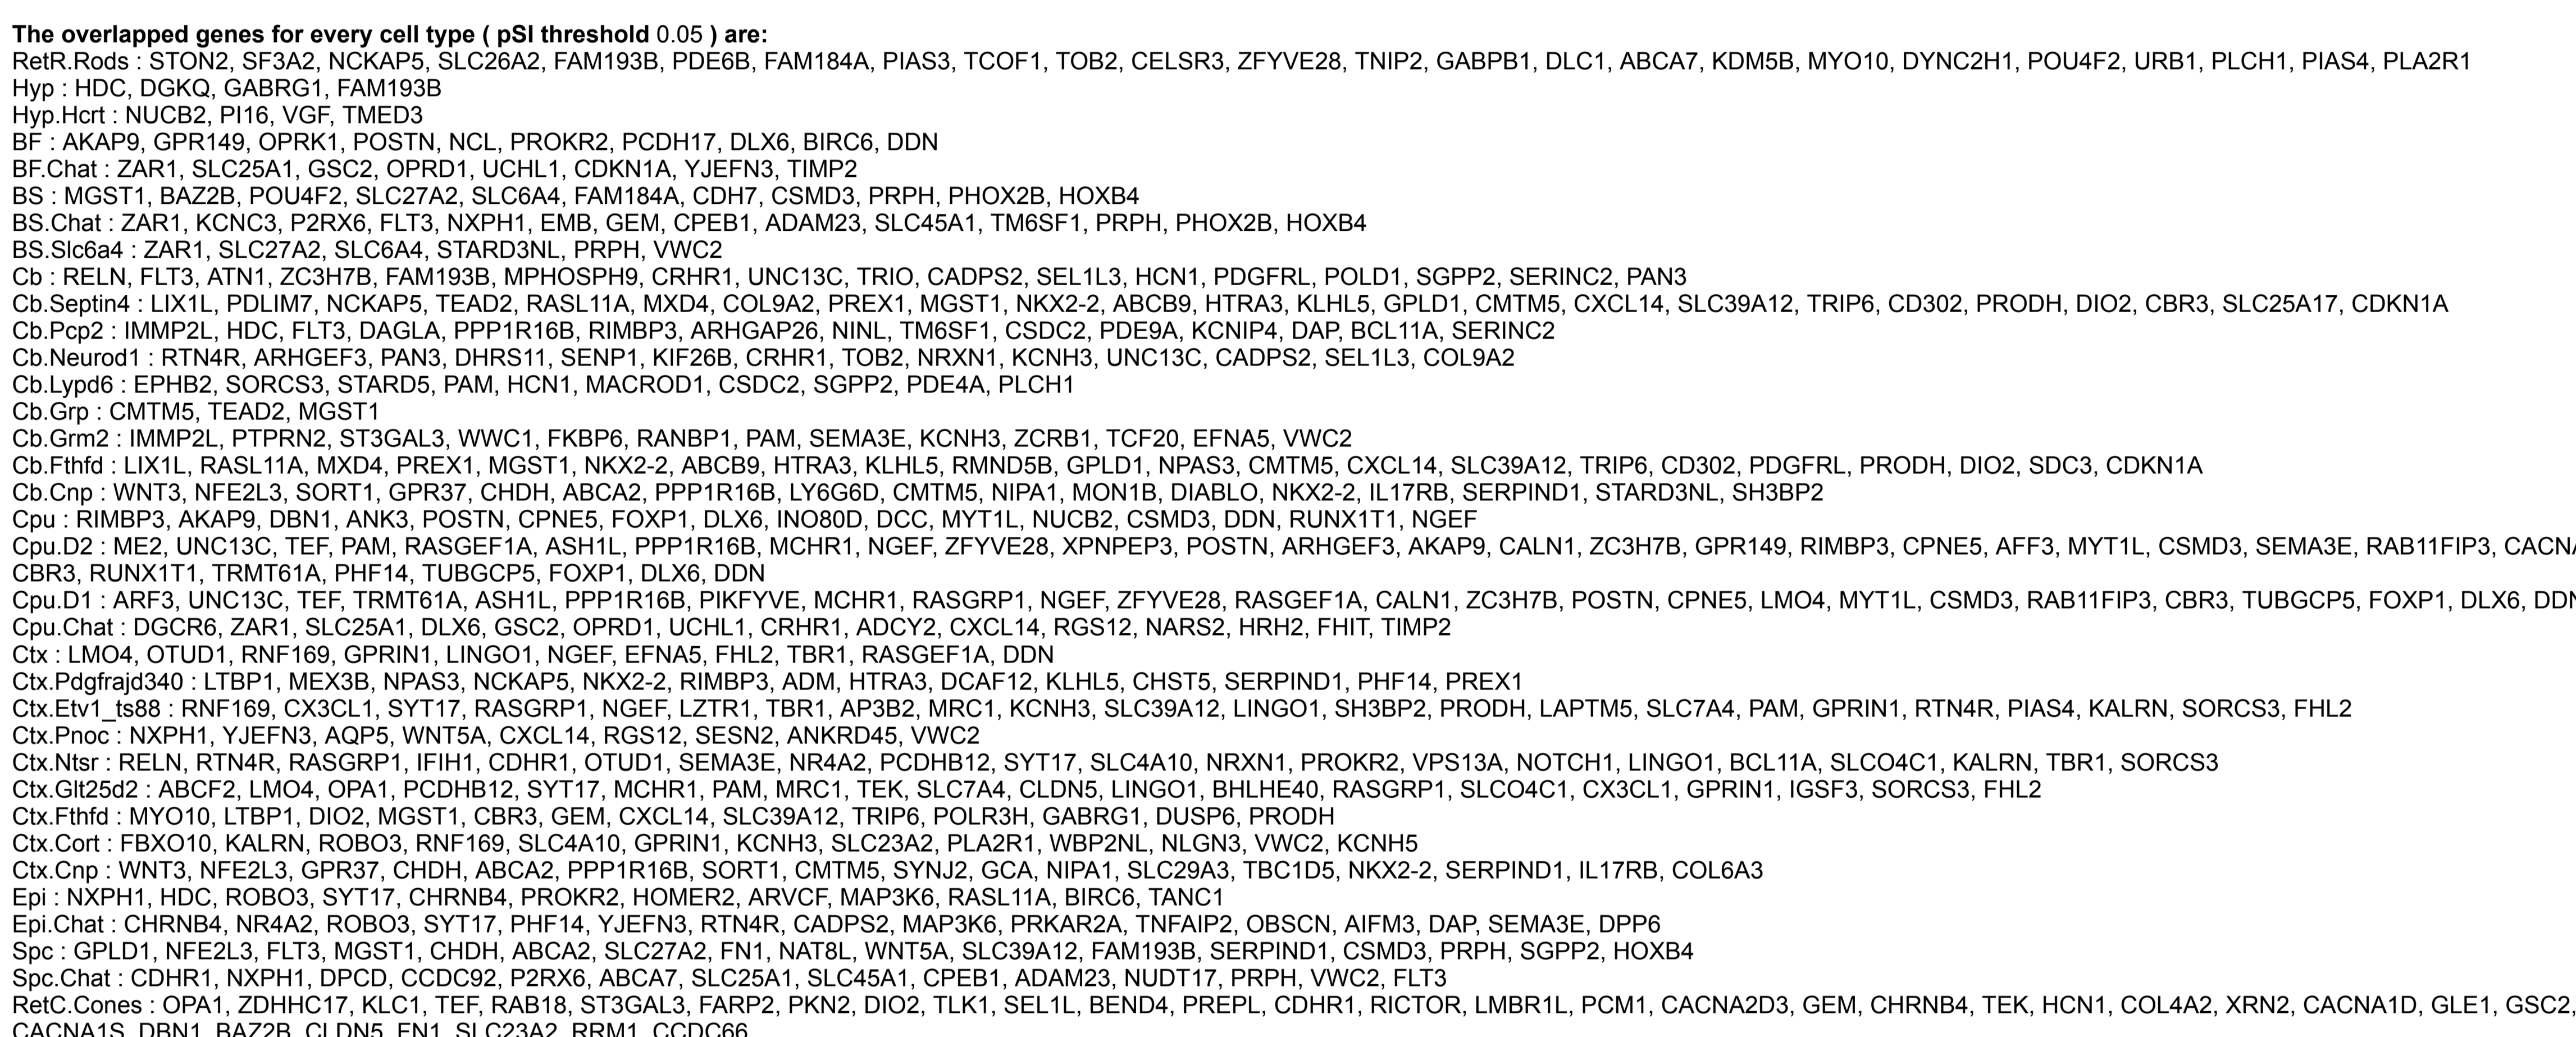

The overlapped genes for every cell type (pSI threshold 0.001 ) are:

RetR.Rods : PDE6B, PLA2R1

Hyp : none

Hyp.Hct1 : P116

BF : none

BF.Chat : OPRD1, ZAR1

BF : POU4F2, SLC6A4

BS.Chat : PRPH, P2RX6, PHOX2B

BS.Slc6a4 : SLC6A4

Cb : none

Cb.Sepin4 : RASL11A, TRIP6, TEAD2

Cb.Ps22 : TM6SF1, HDC, DAP, NINL

Cb.Neurod1 : CRHR1

Cb.Lypd6 : STARD5, PLCH1

Cb.Grp : none

Cb.Grm2 : FKBP6, VWC2

Cb.Fhm3 : MGST1

Cb.Gnp : NFE2L3, SORT1, LY6G6D, GPR37, SERPIND1, IL17RB

Cpu : none

Cpu.D2 : FOXP1, RAB11FIP3, DDN

Cpu.D1 : FOXP1, RAB11FIP3

Cpu.Chat : OPRD1, ZAR1, GSC2

Ctx : none

Ctx.Pdgfraj340 : NKX2-2

Ctx.Elv1\_ts88 : RTN4R, LINGO1, TBR1, MRC1

Ctx.Phoc : RGS12, YJEFN3, AQP5

Ctx.Nlsr : none

Ctx.Gli25d2 : CLDN5, SLC7A4

Ctx.Fhm3 : SLC39A12, DIO2, PRODH

Ctx.Cort : KCNH3

Ctx.Gnp : SERPIND1, NFE2L3, GPR37, CHDH

Epi : PROKR2

Epi.Chat : NR4A2, ROBO3, CHRNB4, TNFAIP2, MAP3K6, OBSCN

Spc : none

Spc.Chat : PRPH

RetC.Cones : CDHR1, LMBR1L, CACNA1S, GEM, BAZ2B

The overlapped genes for every cell type (pSI threshold 0.0001) are:

RetR.Rods : PDE6B, PLA2R1  
Hyp : none  
Hyp.Hct1 : P116  
BF : none  
BF.Chat : OPRD1, ZAR1  
BF : none  
BS.Chat : PRPH, P2RX6, PHOX2B  
BS.Slc6a4 : SLC6A4  
Ct : none  
Ct.Sepin4 : TRIP6  
Ct.Pcgs2 : NINL  
Ct.Neurod1 : none  
Ct.Lypd6 : PLCH1  
Ct.Grp : none  
Ct.Gm2 : VWC2  
Ct.Fhlfd : none  
Ct.Cnp : SERPIND1, IL17RB, GPR37, NFE2L3  
Cpu : none  
Cpu.D2 : FOXP1, RAB1FIP3  
Cpu.D1 : none  
Cpu.Chat : OPRD1, ZAR1  
Ctx : none  
Ctx.Pdgfra3340 : none  
Ctx.Etv1.es88 : TBR1, MRC1  
Ctx.Pnoc : none  
Ctx.Nlsr : none  
Ctx.Gli2562 : none  
Ctx.Fhlfd : none  
Ctx.Cort : none  
Ctx.Cnp : GPR37, CHDH  
Epi : none  
Epi.Chat : NR4A2, ROBO3, CHRNB4, TNFAIP2, MAP3K6, OBSCN  
Spc : none  
Spc.Chat : PRPH  
Spc.Nr4a2 : NR4A2, MIR681, CEM1, DAZ2BP
