# Supplementary material for: Molecular Landscape of Tourette’s Disorder
Source: MDPI journal article supplement (doi:10.3390/ijms24021428), 2023-01-11
Supplement: s1 [file s1]

the inputted 362 genes,  
266 genes exist in the brain cell type expression dataset, 96 genes do not, which are:  
CHL2,SLC25A11,C1RL,NAPSB,LYZ,SP110,NABP1,HLA-DPB1,ANSE3,RNASE2,CLIC1,C17A,TM22,SIGLEC10,SERPINB1,MS4A4A,SLC6A3,SYK,ARPC1B,SECTM1,EFL1,ADGRG5,TLR5,CD300C,CD300E,SP140,C2ORF73,LIILRB1,LIILRB2,LIILRB1,HCP5,C1ORF54,C19ORF38,FCN1,TFEC,VNN2,GBP5,GPRI141,C17ORF64,TAGAP,BCL2A1,DHRS9,SIRPB,MS4A14,NCF2,ACP3,TLR10,PTAFR,RNASET2,NIBAN1,SPH1,TASL,CEACAM21,IFI16,TNFRSF6B,C1ORF162,C5ORF58,C16ORF54,TMEM156,APOBEC3B,PSMB8-AS1,HLA-DOA,HLA-DPA1,LPAR5,FCGR3A,HILPDA,ADGRE2,ARL11,LRRC25,RPL30,NLRC4,BIN2,SERPINA1,HLA-DRA,SERPINA3,TMIGD2,MNDA,APOL4,NGT2,PHYKPL,TLDC2,FCGR2A,MS4A6A,C1R,SIGLEC7,OTULIN,LIILRA2,NAMPTP1,TYMP,SIGLEC8,SIGLEC9,PCLAF,LIILRA5,HLA-DMB,HLA-DQA2,HLA-DMA

Interpretation of CSEA results table:

The first row lists the pSI thresholds, and the first column lists the brain cell types

The values in the tables are the Fisher's Exact p-values, followed by the Benjamini-Hochberg (BH) corrected values in parentheses.

Click the linked p-values to see the overlapped genes for the corresponding brain cell types and thresholds.

| Brain Cell Types and P-Values | 0.05                                   | 0.01                                   | 0.001                                  | 0.0001                                 |
|-------------------------------|----------------------------------------|----------------------------------------|----------------------------------------|----------------------------------------|
| RetR.Rods                     | <a href="#">0.668</a> ( 0.982)         | <a href="#">0.662</a> ( 1.000)         | <a href="#">0.570</a> ( 1.000)         | <a href="#">0.412</a> ( 1.000)         |
| Hyp                           | <a href="#">0.864</a> ( 0.982)         | <a href="#">0.334</a> ( 1.000)         | <a href="#">0.394</a> ( 1.000)         | <a href="#">1.000</a> ( 1.000)         |
| Hyp.Hcrt                      | <a href="#">0.772</a> ( 0.982)         | <a href="#">0.917</a> ( 1.000)         | <a href="#">0.718</a> ( 1.000)         | <a href="#">1.000</a> ( 1.000)         |
| BF                            | <a href="#">0.481</a> ( 0.982)         | <a href="#">1.000</a> ( 1.000)         | <a href="#">1.000</a> ( 1.000)         | <a href="#">1.000</a> ( 1.000)         |
| BF.Chat                       | <a href="#">0.776</a> ( 0.982)         | <a href="#">0.535</a> ( 1.000)         | <a href="#">1.000</a> ( 1.000)         | <a href="#">1.000</a> ( 1.000)         |
| BS                            | <a href="#">0.178</a> ( 0.982)         | <a href="#">0.181</a> ( 1.000)         | <a href="#">0.131</a> ( 0.790)         | <a href="#">1.000</a> ( 1.000)         |
| BS.Chat                       | <a href="#">0.279</a> ( 0.982)         | <a href="#">0.329</a> ( 1.000)         | <a href="#">0.755</a> ( 1.000)         | <a href="#">0.552</a> ( 1.000)         |
| BS.Slc6a4                     | <a href="#">0.912</a> ( 0.982)         | <a href="#">1.000</a> ( 1.000)         | <a href="#">1.000</a> ( 1.000)         | <a href="#">1.000</a> ( 1.000)         |
| Cb                            | <a href="#">0.977</a> ( 0.982)         | <a href="#">0.733</a> ( 1.000)         | <a href="#">0.181</a> ( 0.790)         | <a href="#">1.000</a> ( 1.000)         |
| Cb.Septin4                    | <a href="#">0.585</a> ( 0.982)         | <a href="#">0.316</a> ( 1.000)         | <a href="#">0.382</a> ( 1.000)         | <a href="#">0.298</a> ( 1.000)         |
| Cb.Pcp2                       | <a href="#">0.854</a> ( 0.982)         | <a href="#">0.887</a> ( 1.000)         | <a href="#">1.000</a> ( 1.000)         | <a href="#">1.000</a> ( 1.000)         |
| Cb.Neurod1                    | <a href="#">0.978</a> ( 0.982)         | <a href="#">0.795</a> ( 1.000)         | <a href="#">0.580</a> ( 1.000)         | <a href="#">0.303</a> ( 1.000)         |
| Cb.Lydp6                      | <a href="#">0.784</a> ( 0.982)         | <a href="#">0.614</a> ( 1.000)         | <a href="#">0.261</a> ( 1.000)         | <a href="#">0.166</a> ( 1.000)         |
| Cb.Grp                        | <a href="#">0.153</a> ( 0.982)         | <a href="#">0.505</a> ( 1.000)         | <a href="#">1.000</a> ( 1.000)         | <a href="#">1.000</a> ( 1.000)         |
| Cb.Grm2                       | <a href="#">0.973</a> ( 0.982)         | <a href="#">0.547</a> ( 1.000)         | <a href="#">1.000</a> ( 1.000)         | <a href="#">1.000</a> ( 1.000)         |
| Cb.Fthfd                      | <a href="#">0.714</a> ( 0.982)         | <a href="#">0.551</a> ( 1.000)         | <a href="#">1.000</a> ( 1.000)         | <a href="#">1.000</a> ( 1.000)         |
| Cb.Cnp                        | <a href="#">0.867</a> ( 0.982)         | <a href="#">0.903</a> ( 1.000)         | <a href="#">0.971</a> ( 1.000)         | <a href="#">0.875</a> ( 1.000)         |
| Cpu                           | <a href="#">0.586</a> ( 0.982)         | <a href="#">0.700</a> ( 1.000)         | <a href="#">1.000</a> ( 1.000)         | <a href="#">1.000</a> ( 1.000)         |
| Cpu.D2                        | <a href="#">0.981</a> ( 0.982)         | <a href="#">0.647</a> ( 1.000)         | <a href="#">0.370</a> ( 1.000)         | <a href="#">0.473</a> ( 1.000)         |
| Cpu.D1                        | <a href="#">0.977</a> ( 0.982)         | <a href="#">0.670</a> ( 1.000)         | <a href="#">1.000</a> ( 1.000)         | <a href="#">1.000</a> ( 1.000)         |
| Cpu.Chat                      | <a href="#">0.878</a> ( 0.982)         | <a href="#">0.874</a> ( 1.000)         | <a href="#">1.000</a> ( 1.000)         | <a href="#">1.000</a> ( 1.000)         |
| Ctx                           | <a href="#">0.808</a> ( 0.982)         | <a href="#">0.524</a> ( 1.000)         | <a href="#">1.000</a> ( 1.000)         | <a href="#">1.000</a> ( 1.000)         |
| Ctx.Pdgfradj340               | <a href="#">0.708</a> ( 0.982)         | <a href="#">0.143</a> ( 1.000)         | <a href="#">0.152</a> ( 0.790)         | <a href="#">0.230</a> ( 1.000)         |
| Ctx.Elv1_ts88                 | <a href="#">5.988e-12</a> ( 2.446e-10) | <a href="#">2.753e-14</a> ( 9.637e-13) | <a href="#">3.563e-10</a> ( 1.247e-08) | <a href="#">8.173e-11</a> ( 2.861e-09) |
| Ctx.Pnoc                      | <a href="#">0.951</a> ( 0.982)         | <a href="#">1.000</a> ( 1.000)         | <a href="#">1.000</a> ( 1.000)         | <a href="#">1.000</a> ( 1.000)         |
| Ctx.Nlsr                      | <a href="#">0.889</a> ( 0.982)         | <a href="#">0.370</a> ( 1.000)         | <a href="#">0.026</a> ( 0.308)         | <a href="#">0.113</a> ( 0.990)         |
| Ctx.Gli25d2                   | <a href="#">0.385</a> ( 0.982)         | <a href="#">1.000</a> ( 1.000)         | <a href="#">1.000</a> ( 1.000)         | <a href="#">1.000</a> ( 1.000)         |
| Ctx.Fthfd                     | <a href="#">0.434</a> ( 0.982)         | <a href="#">0.458</a> ( 1.000)         | <a href="#">1.000</a> ( 1.000)         | <a href="#">1.000</a> ( 1.000)         |
| Ctx.Cort                      | <a href="#">0.982</a> ( 0.982)         | <a href="#">0.672</a> ( 1.000)         | <a href="#">1.000</a> ( 1.000)         | <a href="#">1.000</a> ( 1.000)         |
| Ctx.Cnp                       | <a href="#">0.982</a> ( 0.982)         | <a href="#">0.998</a> ( 1.000)         | <a href="#">1.000</a> ( 1.000)         | <a href="#">1.000</a> ( 1.000)         |
| Epi                           | <a href="#">0.831</a> ( 0.982)         | <a href="#">1.000</a> ( 1.000)         | <a href="#">1.000</a> ( 1.000)         | <a href="#">1.000</a> ( 1.000)         |
| Epi.Chat                      | <a href="#">0.898</a> ( 0.982)         | <a href="#">0.441</a> ( 1.000)         | <a href="#">0.346</a> ( 1.000)         | <a href="#">0.755</a> ( 1.000)         |
| Spc                           | <a href="#">0.275</a> ( 0.982)         | <a href="#">0.013</a> ( 0.220)         | <a href="#">0.025</a> ( 0.308)         | <a href="#">0.106</a> ( 0.990)         |
| Spc.Chat                      | <a href="#">0.847</a> ( 0.982)         | <a href="#">0.351</a> ( 1.000)         | <a href="#">0.176</a> ( 0.790)         | <a href="#">0.034</a> ( 0.595)         |
| RetC.Cones                    | <a href="#">0.549</a> ( 0.982)         | <a href="#">0.199</a> ( 1.000)         | <a href="#">0.063</a> ( 0.554)         | <a href="#">0.478</a> ( 1.000)         |

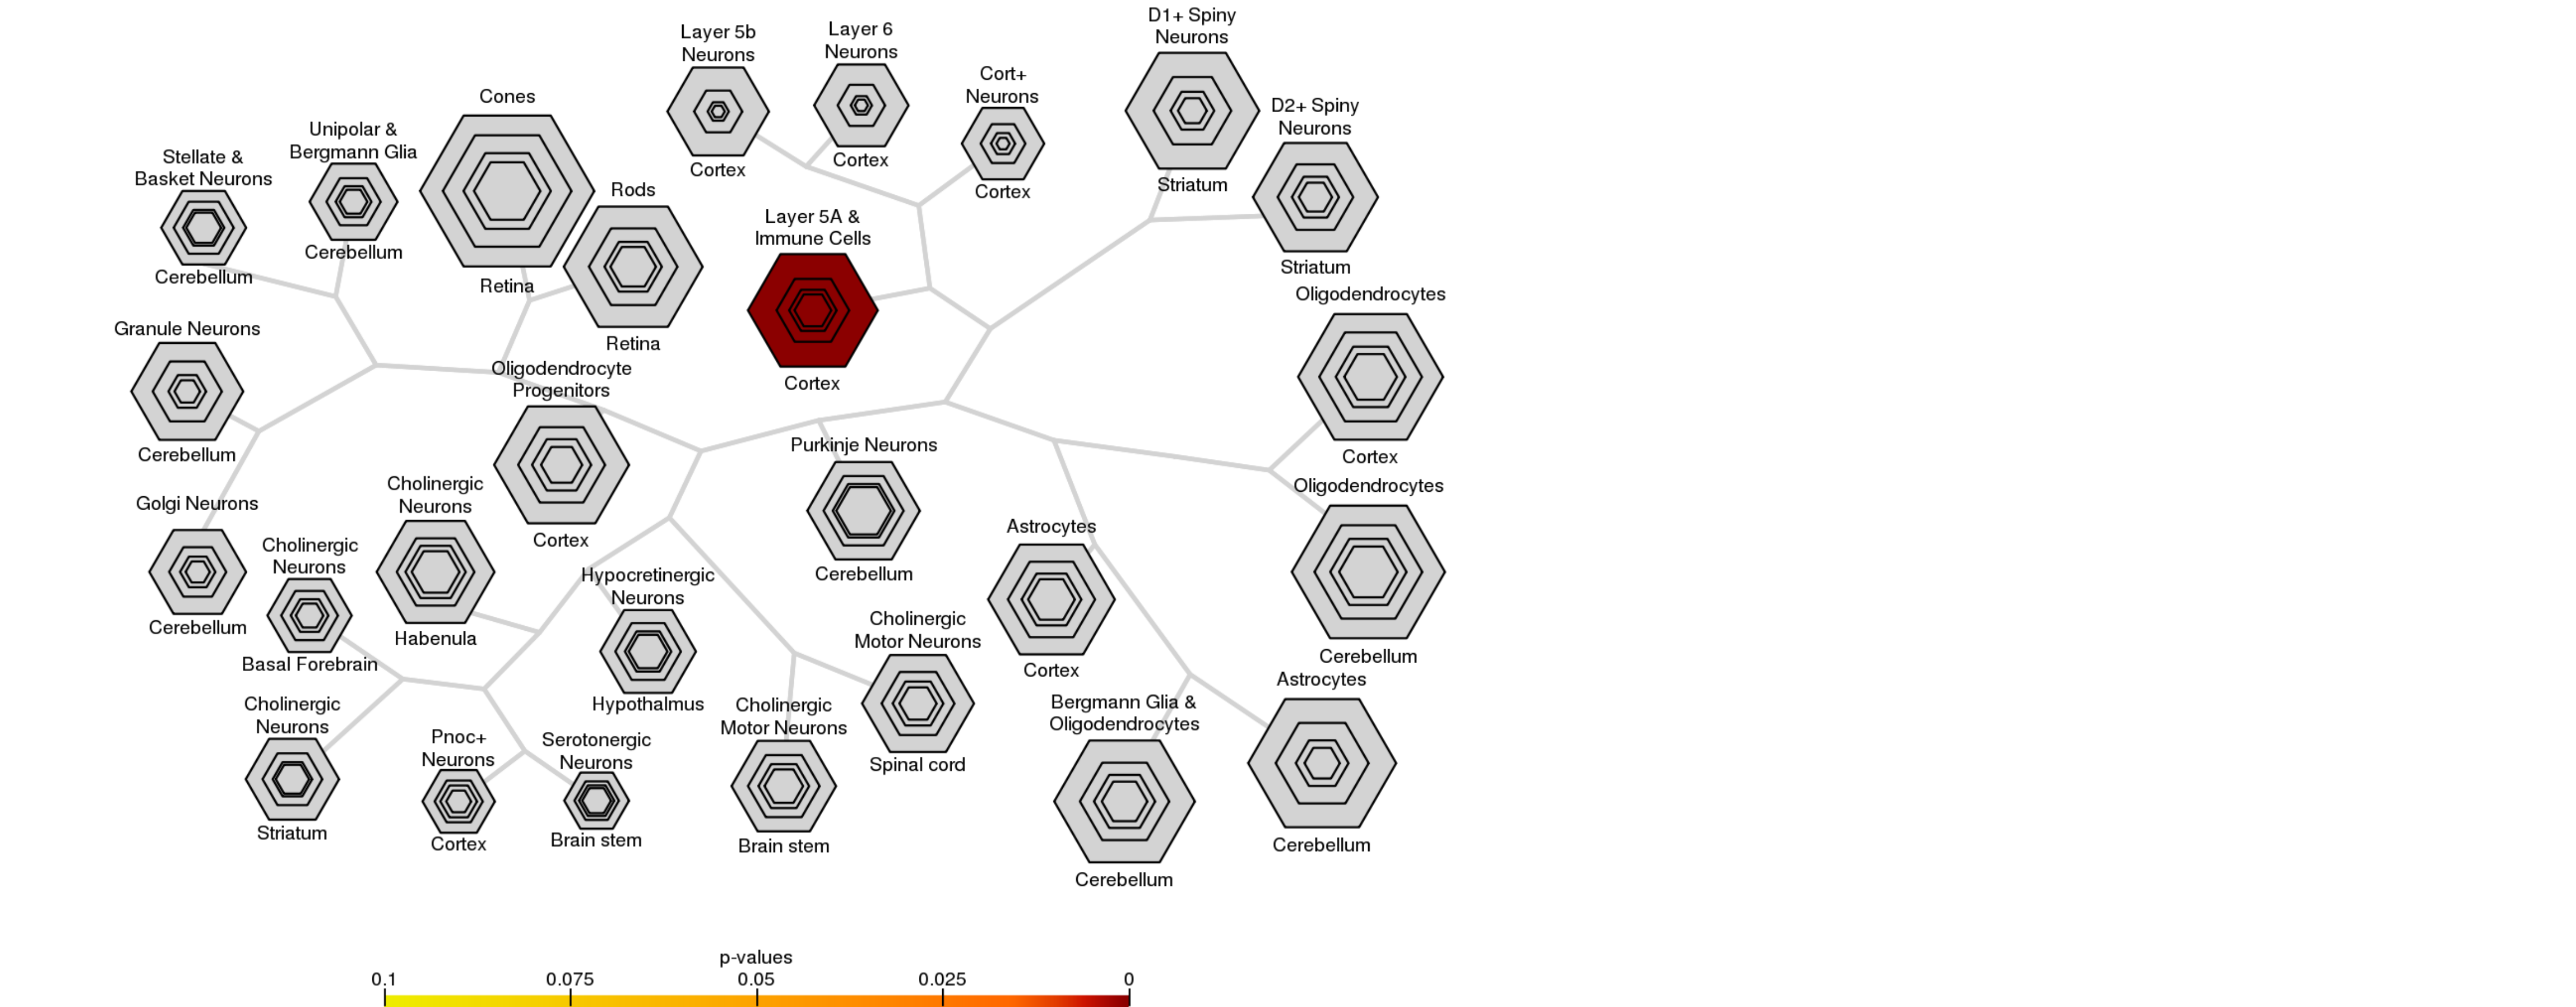

The overlapped genes for every cell type ( pSI threshold 0.05 ) are:

RetR.Rods : S4GALT1, EHD4, CXCL16, MYD88, RTE11, SLC26A2, TNFAIP3, HCLS1, SUSO3, RHBDP2

Hyp : C1QC, SELPLG, RNASE6

Hyp.Hcrt : SLPI, PIK3R5, UCP2, CASP1

BF : LY86, FCER1G, C1QA, CD163, CD68

BF.Chat : SLPI, RGS10, LST1

BS : FCER1G, OLFML3, TAL1, IGFBP2, C1QB, LY86, C3

BS.Chat : CLIC1, BIRC5, CSRP2, EMB, TNFSF13B, LCP1, PIK3R5, C3

BS.Slc6a4 : LST1

Cb : SLA, RPS6KA1, RTE11, PIK3R3, LYN

Cb.Septin4 : B2M, CH13L1, B4GALT1, VAMP8, CMTM3, CLIC1, CASP1, HK2, CYBA, UCP2, HCK

Cb.Pcp2 : ARHGAP15, ALOX5AP, RTE11, LCP1, F11R

Cb.Neurod1 : RPS6KA1, UNC13D, VAMP8

Cb.Lydp6 : CMTM7, SLA, PLVAP

Cb.Grp : CH13L1, VAMP8, CMTM3, CLIC1, CASP1, HK2, UCP2

Cb.Fthfd : B2M, CH13L1, PTGS1, VAMP8, CMTM3, LHFPL2, HK2, CYBA, UCP2, IFI30, CASP1

Cb.Cnp : SLPI, LAP3, ST6GAL1, PSTPIP2, IL18, LHFPL2, ARHGAP15, RPS6KA1, CTSC, MTHFD2

Cpu : SELPLG, AIF1, C1QB, C1QA, ARHGDIB

Cpu.D2 : CD4, CISH, AIF1, ARHGDIB, CD68

Cpu.Chat : RGS10, LST1, CASP1

Cx : ARHGAP15, ARHGAP25, BLNK

Ctx.Pdgfradj340 : RAB32, ST6GAL1, CMTM3, ASF1B, NUSAP1, MYD88, CDK1, CDK2, ETV6

Ctx.Elv1\_ts88 : PTPN6, BLNK, AIF1, CYTH4, TBXAS1, ITGB2, IRF8, ADAP2, PTGS1, GMFG, HK3, FERMT3, STAB1, IGFBP2, CYBA, CTSS, NCKAP1L, CD14, LYVE1, CTSC, RAB32, FCER1G, F13A1, INPP5D, CD163, LY86, SLC11A1, CD68, CSF1R, LAPTMS, TNFAIP8L2, C1QC, C1QB, C1QA, ARHGDIB, MS4A7

Ctx.Pnoc : LST1

Ctx.Nlsr : CSF1R, ARHGAP25, BLNK

Ctx.Gli25d2 : BLNK, ARHGAP25, CSF1R, GBP2, ITGB2, TNFAIP3, LRG1

Ctx.Fthfd : CH13L1, VAMP8, CMTM3, MYD88, IL18, F11R, IGFBP2, ABCC4, VNN1, DAPP1

Ctx.Cort : PTGS1, MAFB

Ctx.Cnp : LAP3, ST6GAL1, LCP1, RPS6KA1, CTSC, MTHFD2

Epi : CMTM7, C1QC, FCER1G, TAL1

Epi.Chat : NFAM1, PSMB8, DOCK2, C1QA, PSMB9

Spc : S100A9, OLFML3, PTPRC, S100A8, CSF1R, TNFSF13B, TMEM119, C1QB, CTSS, LY86, SELPLG, ABCC4, C3

Spc.Chat : TNFSF13B, PIK3R5, LCP1, CF1, MTHFD2

RetC.Cones : MALT1, SAMSN1, LYVE1, NAGA, OLFML3, SLC1A7, HK2, LMNB1, NFKB1, LHFPL2, PRAM1, C1QA, ARHGDIB, AB13, CTSC, PIK3AP1, GPSM3

The overlapped genes for every cell type ( pSI threshold 0.01 ) are:

RetR.Rods : SUSO3, S4GALT1, SLC26A2, TNFAIP3

Hyp : SELPLG, RNASE6

Hyp.Hcrt : CASP1

BF : none

BF.Chat : RGS10, LST1

BS : LY86, TAL1

BS.Chat : TNFSF13B, LCP1, CLIC1, CSRP2

BS.Slc6a4 : none

BS.Slc6a4 : none

Cb : SLA, RPS6KA1

Cb.Septin4 : CH13L1, CMTM3, CASP1, HK2, CYBA, UCP2

Cb.Pcp2 : ALOX5AP, RTE11

Cb.Neurod1 : RPS6KA1, UNC13D

Cb.Lydp6 : CMTM7, SLA

Cb.Grp : HK2, UCP2

Cb.Grm2 : PRR34, F11R

Cb.Fthfd : CMTM3, CH13L1, CYBA, HK2, VAMP8

Cb.Cnp : LAP3, ARHGAP15, ST6GAL1, CTSC

Cpu : ARHGDIB

Cpu.D2 : CD4, CISH, ARHGDIB

Cpu.D1 : CD4, AIF1, ARHGDIB

Cpu.Chat : LST1

Cx : ARHGAP25

Ctx.Pdgfradj340 : RAB32, CMTM3, ASF1B, NUSAP1, CDK1, CDK2, ETV6

Ctx.Elv1\_ts88 : PTPN6, CYTH4, ITGB2, PTGS1, FERMT3, STAB1, IGFBP2, CYBA, CD14, LYVE1, RAB32, FCER1G, F13A1, CD163, SLC11A1, CD68, CSF1R, LAPTMS, TNFAIP8L2, C1QC, C1QB, C1QA, MS4A7

Ctx.Pnoc : none

Ctx.Nlsr : ARHGAP25, BLNK

Ctx.Gli25d2 : none

Ctx.Fthfd : CMTM3, CH13L1, IGFBP2, MYD88, DAPP1

Ctx.Cort : MAFB

Ctx.Cnp : LAP3

Epi : none

Epi.Chat : NFAM1, PSMB9, DOCK2, PSMB8

Spc : S100A8, PTPRC, S100A9, CSF1R, TMEM119, CTSS, LY86, C3

Spc.Chat : TNFSF13B, PIK3R5, LCP1, CF1

RetC.Cones : MALT1, SAMSN1, LYVE1, SLC1A7, HK2, LMNB1, PRAM1, ARHGDIB, AB13, PIK3AP1, GPSM3

The overlapped genes for every cell type ( pSI threshold 0.001 ) are:

RetR.Rods : SUSO3, TNFAIP3

Hyp : RNASE6

Hyp.Hcrt : CASP1

BF : none

BF.Chat : none

BS : TAL1

BS.Chat : LCP1

BS.Slc6a4 : none

Cb : SLA, RPS6KA1

Cb.Septin4 : HK2, CH13L1, UCP2

Cb.Pcp2 : none

Cb.Neurod1 : RPS6KA1

Cb.Lydp6 : SLA, CMTM7

Cb.Grp : none

Cb.Grm2 : none

Cb.Fthfd : none

Cb.Cnp : CTSC

Cpu : none

Cpu.D2 : CD4, ARHGDIB

Cpu.D1 : none

Cpu.Chat : none

Cx : none

Ctx.Pdgfradj340 : RAB32, NUSAP1, CDK1, CDK2

Ctx.Elv1\_ts88 : PTPN6, F13A1, CSF1R, STAB1, CYTH4, C1QC, C1QB, C1QA, CD163, CD14, LYVE1, MS4A7

Ctx.Pnoc : none

Ctx.Nlsr : ARHGAP25, BLNK

Ctx.Gli25d2 : none

Ctx.Fthfd : none

Ctx.Cort : none

Ctx.Cnp : none

Epi : none

Epi.Chat : PSMB9, NFAM1, DOCK2

Spc : PTPRC, S100A8, LY86, C3

Spc.Chat : TNFSF13B, LCP1, CF1

RetC.Cones : MALT1, SAMSN1, SLC1A7, HK2, LMNB1, ARHGDIB, PIK3AP1, GPSM3

The overlapped genes for every cell type ( pSI threshold 0.0001 ) are:

RetR.Rods : SUSO3, TNFAIP3

Hyp : none

Hyp.Hcrt : none

BF : none

BF.Chat : none

BS : none

BS.Chat : LCP1

BS.Slc6a4 : none

Cb : none

Cb.Septin4 : HK2, UCP2

Cb.Pcp2 : none

Cb.Neurod1 : RPS6KA1

Cb.Lydp6 : SLA, CMTM7

Cb.Grp : none

Cb.Grm2 : none

Cb.Fthfd : none

Cb.Cnp : CTSC

Cpu : none

Cpu.D2 : CD4

Cpu.D1 : none

Cpu.Chat : none

Cx : none

Ctx.Pdgfradj340 : RAB32, NUSAP1

Ctx.Elv1\_ts88 : PTPN6, F13A1, CSF1R, STAB1, CYTH4, C1QC, C1QB, C1QA, CD163, CD14, MS4A7

Ctx.Pnoc : none

Ctx.Nlsr : ARHGAP25

Ctx.Gli25d2 : none

Ctx.Fthfd : none

Ctx.Cort : none

Ctx.Cnp : none

Epi : none

Epi.Chat : NFAM1

Spc : S100A8, C3

Spc.Chat : TNFSF13B, LCP1, CF1

RetC.Cones : SAMSN1, PIK3AP1, SLC1A7
