# Supplementary material for: Molecular Landscape of Tourette’s Disorder
Source: Int J Mol Sci. 2023 Jan 11;24(2):1428. doi: 10.3390/ijms24021428 (PMC9865021; doi:10.3390/ijms24021428)
Supplement: Supplementary file 1 [file ijms-24-01428-s001.zip]

Archive with 15 entries (15 files):
- supplementary Figure S1.pdf
- supplementary Figure S2.pdf
- supplementary File S1.pdf
- supplementary File S2.pdf
- supplementary File S3.pdf
- supplementary File S4.pdf
- supplementary File S5.pdf
- supplementary File S6.pdf
- supplementary File S7.pdf
- supplementary File S8.pdf
- supplementary Table S1.xlsx
- supplementary Table S2.xlsx
- supplementary Table S3.xlsx
- supplementary Table S4.xlsx
- supplementary Table S5.xlsx
