# Supplementary material for: Molecular Landscape of Tourette’s Disorder
Source: Int J Mol Sci. 2023 Jan 11;24(2):1428. doi: 10.3390/ijms24021428 (PMC9865021; doi:10.3390/ijms24021428)
Supplement: Supplementary file 1 [file ijms-24-01428-s001.zip › supplementary File S1.pdf]

The overlapped genes for every tissue ( pSI threshold 0.0001 ) are:  
 Adipose Tissue : none  
 Adrenal Gland : NXP1, PHOX2B  
 Blood : none  
 Blood Vessel : none  
 Brain : SLITRK1, UNC13C, MYT1L, TBR1, SLC4A10, GABRG1, CALN1, MCHR2, SLC24A2, CNTNAP4, SLC39A12, HS3ST4, SULT4A1, POU3F2  
 Breast : none  
 Colon : CLCA4, CHST5, CLCA1, CDX2  
 Esophagus : none  
 Fallopian Tube : none  
 Heart : none  
 Kidney : none  
 Liver : none  
 Lung : NAPSA, SLC6A4  
 Muscle : NEB  
 Nerve : none  
 Ovary : none  
 Pancreas : none  
 Pituitary : none  
 Prostate : none  
 Skin : FLG  
 Stomach : none  
 Testis : PIWIL3, GSC2, ZNF560, RIMBP3, OPRM1, OR56A1, POU4F2, SLC6A1, PIWIL1, BPIFB3, POTE4, FSCB  
 Thyroid : TSHR  
 Uterus : none  
 Vagina : none
