# Supplementary material for: Molecular Landscape of Tourette’s Disorder
Source: Int J Mol Sci. 2023 Jan 11;24(2):1428. doi: 10.3390/ijms24021428 (PMC9865021; doi:10.3390/ijms24021428)
Supplement: Supplementary file 1 [file ijms-24-01428-s001.zip › supplementary File S6.pdf]

506 genes exist in the brain cell type expression dataset, 186 genes do not, which are:  
HSPA6,NCF2,IGHG4,HBD,IGHG2,HHB,LILRB1,AS1,LDLRAD2,CHI3L2,FCGR1A,S100A11,IGKC,S100A12,MICB,C1ORF112,C1RL,NAPBS,TMEM92,LYZ,IGKJ1,IGKJ4,FAM110D,VSIR,HLA-DQB1,CEACAM4,HLA-  
DPB1,SMC01,RNASE2,PKR29,CLEC17A,HLA-DRB1,OASL,TRIM22,HLA-  
DRB5,SIGLEC14,SRARP,SIGLEC10,SERPINH1,MS4A4A,LINC02590,MT1G,CXCL6,SYK,CXCL8,CLEC2B,SECTM1,MT1A,ARPC1B,CD300C,YBX3,CD300E,C10ORF105,CGAS,CLEC12A,TNFSF18,SNORD60,LILRB4,MT1X,LILRB2,LILRB1,TUBA1C,MT1M,MT1H,C4A,C4B,PIRT,C19ORF38,MT1B,FCN1,MT1JP,IL4R,TFEC,VNN2,AGAP11,GBP5,TNFRSF10A,  
AS1,PPP1R18,BTNL3,MS4A6A,TUBAL3,DEP1,UBE2C,SIRPB2,MS4A6E,TRIM5,METTL2B,TESPA1,TNFRSF10C,TNFRSF10A,CD44,  
AS1,PTAFR,IGLC1,TNFRSF10D,PLP2,RNASET2,KIF19,NIBAN2,CIBAR2,SLC52A3,SPH1,TASL,CEACAM21,IRAG1,IFI16,KNL1,C7ORF61,TNFRSF6B,IGKJ5,ZBED2,IGHA1,ADGRE1,TMEM156,IL6R,C1ORF162,ADGRL4,CSORF58,PLAAT4,SHC1,LILRA2,C16ORF54,MCEMP1,PCLA,LRRC32,BCL2A1,ORTA5,SIGLEC7,PSMB8-  
AS1,HLA-DOA,HLA-DPA1,NABP1,LPAR5,MK67,LCN6,MT2A,FAM111B,CPAMD8,FCGR3A,RNASE3,HILPDA,ADGRE2,ARL11,LRRC25,C1ORF87,CMAPF,FYB1,BIN2,SERPINA1,HLA-  
DRA,SERPINA3,TMIGD2,TLR5,TMEM258B,LILRA1,SIGLEC9,APOL4,APOL1,GN2T2,IGFLR1,HSPB1,TLDC2,TMPRSS3,FCGR2A,FAM216B,IL32,C1R,HBA1,MT1CP,HBA2,IGHM,JCHAIN,SBNO2,TAX1BP3,CASP5,MS4A14,CA1,ACKR1,NAMPTP1,HLA-  
DQA1,TYMP,SIGLEC8,ADH1B,ALOX15B,LILRA5,HLA-DMB,LILRA3,HLA-DMA

Interpretation of CSEA results table:  
The first row lists the pSI thresholds, and the first column lists the brain cell types  
The values in the tables are the Fisher's Exact p-values, followed by the Benjamini-Hochberg (BH) corrected values in parentheses.  
Click the linked p-values to see the overlapped genes for the corresponding brain cell types and thresholds.

|                                                                                                                                    |                                        |                                        |                                        |                                        |
|------------------------------------------------------------------------------------------------------------------------------------|----------------------------------------|----------------------------------------|----------------------------------------|----------------------------------------|
| The first row lists the pSI thresholds, and the first column lists the brain cell types                                            |                                        |                                        |                                        |                                        |
| The values in the tables are the Fisher's Exact p-values, followed by the Benjamini-Hochberg (BH) corrected values in parentheses. |                                        |                                        |                                        |                                        |
| Click the linked p-values to see the overlapped genes for the corresponding brain cell types and thresholds.                       |                                        |                                        |                                        |                                        |
| Brain Cell Types and P-Values                                                                                                      | 0.05                                   | 0.01                                   | 0.001                                  | 0.0001                                 |
| RetR.Rods                                                                                                                          | <a href="#">0.529</a> ( 1.000)         | <a href="#">0.239</a> ( 0.696)         | <a href="#">0.010</a> ( 0.089)         | <a href="#">0.051</a> ( 0.228)         |
| Hyp                                                                                                                                | <a href="#">0.570</a> ( 1.000)         | <a href="#">0.025</a> ( 0.134)         | <a href="#">0.013</a> ( 0.094)         | <a href="#">0.011</a> ( 0.198)         |
| Hyp.Hcrt                                                                                                                           | <a href="#">0.198</a> ( 0.652)         | <a href="#">0.504</a> ( 0.882)         | <a href="#">0.213</a> ( 0.610)         | <a href="#">0.486</a> ( 0.971)         |
| BF                                                                                                                                 | <a href="#">0.006</a> ( 0.037)         | <a href="#">0.024</a> ( 0.134)         | <a href="#">0.292</a> ( 0.610)         | <a href="#">0.038</a> ( 0.228)         |
| BF.Chat                                                                                                                            | <a href="#">0.369</a> ( 0.992)         | <a href="#">0.442</a> ( 0.882)         | <a href="#">1.000</a> ( 1.000)         | <a href="#">1.000</a> ( 1.000)         |
| BS                                                                                                                                 | <a href="#">0.015</a> ( 0.071)         | <a href="#">0.181</a> ( 0.633)         | <a href="#">0.236</a> ( 0.610)         | <a href="#">1.000</a> ( 1.000)         |
| BS.Chat                                                                                                                            | <a href="#">0.082</a> ( 0.320)         | <a href="#">0.313</a> ( 0.842)         | <a href="#">0.271</a> ( 0.610)         | <a href="#">0.063</a> ( 0.244)         |
| BS.Slc6a4                                                                                                                          | <a href="#">0.946</a> ( 1.000)         | <a href="#">0.884</a> ( 0.980)         | <a href="#">0.719</a> ( 0.991)         | <a href="#">1.000</a> ( 1.000)         |
| Cb                                                                                                                                 | <a href="#">0.975</a> ( 1.000)         | <a href="#">0.728</a> ( 0.950)         | <a href="#">0.435</a> ( 0.734)         | <a href="#">1.000</a> ( 1.000)         |
| Cb.Septin4                                                                                                                         | <a href="#">2.521e-04</a> ( 0.002)     | <a href="#">5.312e-04</a> ( 0.006)     | <a href="#">0.008</a> ( 0.088)         | <a href="#">0.017</a> ( 0.198)         |
| Cb.Pcp2                                                                                                                            | <a href="#">0.937</a> ( 1.000)         | <a href="#">0.924</a> ( 0.980)         | <a href="#">0.921</a> ( 1.000)         | <a href="#">1.000</a> ( 1.000)         |
| Cb.Neurod1                                                                                                                         | <a href="#">0.889</a> ( 1.000)         | <a href="#">0.759</a> ( 0.950)         | <a href="#">0.461</a> ( 0.734)         | <a href="#">0.500</a> ( 0.971)         |
| Cb.Lypd6                                                                                                                           | <a href="#">0.528</a> ( 1.000)         | <a href="#">0.555</a> ( 0.883)         | <a href="#">0.292</a> ( 0.610)         | <a href="#">0.162</a> ( 0.516)         |
| Cb.Grp                                                                                                                             | <a href="#">7.521e-04</a> ( 0.005)     | <a href="#">0.041</a> ( 0.180)         | <a href="#">0.181</a> ( 0.610)         | <a href="#">0.201</a> ( 0.585)         |
| Cb.Grm2                                                                                                                            | <a href="#">0.975</a> ( 1.000)         | <a href="#">0.867</a> ( 0.980)         | <a href="#">0.382</a> ( 0.704)         | <a href="#">0.480</a> ( 0.971)         |
| Cb.Fthfd                                                                                                                           | <a href="#">2.849e-06</a> ( 4.986e-05) | <a href="#">0.027</a> ( 0.134)         | <a href="#">0.365</a> ( 0.704)         | <a href="#">0.697</a> ( 1.000)         |
| Cb.Cnp                                                                                                                             | <a href="#">0.895</a> ( 1.000)         | <a href="#">0.498</a> ( 0.882)         | <a href="#">0.651</a> ( 0.949)         | <a href="#">0.555</a> ( 1.000)         |
| Cpu                                                                                                                                | <a href="#">0.646</a> ( 1.000)         | <a href="#">0.395</a> ( 0.882)         | <a href="#">0.265</a> ( 0.610)         | <a href="#">1.000</a> ( 1.000)         |
| Cpu.D2                                                                                                                             | <a href="#">1.000</a> ( 1.000)         | <a href="#">0.760</a> ( 0.950)         | <a href="#">0.446</a> ( 0.734)         | <a href="#">0.708</a> ( 1.000)         |
| Cpu.D1                                                                                                                             | <a href="#">0.994</a> ( 1.000)         | <a href="#">0.896</a> ( 0.980)         | <a href="#">0.880</a> ( 1.000)         | <a href="#">0.603</a> ( 1.000)         |
| Cpu.Chat                                                                                                                           | <a href="#">0.735</a> ( 1.000)         | <a href="#">0.547</a> ( 0.883)         | <a href="#">0.823</a> ( 1.000)         | <a href="#">1.000</a> ( 1.000)         |
| Ctx                                                                                                                                | <a href="#">0.986</a> ( 1.000)         | <a href="#">0.409</a> ( 0.882)         | <a href="#">1.000</a> ( 1.000)         | <a href="#">1.000</a> ( 1.000)         |
| Ctx.Pdgfrajd340                                                                                                                    | <a href="#">0.762</a> ( 1.000)         | <a href="#">0.201</a> ( 0.640)         | <a href="#">0.043</a> ( 0.213)         | <a href="#">0.052</a> ( 0.228)         |
| Ctx.Etlv1_ts88                                                                                                                     | <a href="#">5.949e-08</a> ( 2.082e-06) | <a href="#">8.425e-11</a> ( 2.949e-09) | <a href="#">1.020e-07</a> ( 3.570e-06) | <a href="#">5.678e-09</a> ( 1.987e-07) |
| Ctx.Pnoc                                                                                                                           | <a href="#">0.926</a> ( 1.000)         | <a href="#">0.709</a> ( 0.950)         | <a href="#">0.759</a> ( 0.991)         | <a href="#">1.000</a> ( 1.000)         |
| Ctx.Nlsr                                                                                                                           | <a href="#">0.969</a> ( 1.000)         | <a href="#">1.000</a> ( 1.000)         | <a href="#">1.000</a> ( 1.000)         | <a href="#">1.000</a> ( 1.000)         |
| Ctx.Gli25d2                                                                                                                        | <a href="#">0.939</a> ( 1.000)         | <a href="#">1.000</a> ( 1.000)         | <a href="#">1.000</a> ( 1.000)         | <a href="#">1.000</a> ( 1.000)         |
| Ctx.Fthfd                                                                                                                          | <a href="#">0.016</a> ( 0.071)         | <a href="#">0.011</a> ( 0.095)         | <a href="#">0.018</a> ( 0.103)         | <a href="#">0.029</a> ( 0.228)         |
| Ctx.Cort                                                                                                                           | <a href="#">0.940</a> ( 1.000)         | <a href="#">0.629</a> ( 0.950)         | <a href="#">1.000</a> ( 1.000)         | <a href="#">1.000</a> ( 1.000)         |
| Ctx.Cnp                                                                                                                            | <a href="#">0.949</a> ( 1.000)         | <a href="#">0.889</a> ( 0.980)         | <a href="#">0.764</a> ( 0.991)         | <a href="#">0.793</a> ( 1.000)         |
| Epi                                                                                                                                | <a href="#">0.300</a> ( 0.876)         | <a href="#">0.378</a> ( 0.882)         | <a href="#">0.556</a> ( 0.847)         | <a href="#">0.243</a> ( 0.653)         |
| Epi.Chat                                                                                                                           | <a href="#">0.984</a> ( 1.000)         | <a href="#">0.467</a> ( 0.882)         | <a href="#">0.205</a> ( 0.610)         | <a href="#">0.271</a> ( 0.677)         |
| Spc                                                                                                                                | <a href="#">3.502e-05</a> ( 4.085e-04) | <a href="#">1.658e-06</a> ( 2.901e-05) | <a href="#">2.236e-04</a> ( 0.004)     | <a href="#">0.087</a> ( 0.305)         |
| Spc.Chat                                                                                                                           | <a href="#">0.205</a> ( 0.652)         | <a href="#">0.117</a> ( 0.457)         | <a href="#">0.296</a> ( 0.610)         | <a href="#">0.045</a> ( 0.228)         |
| RetC.Cones                                                                                                                         | <a href="#">0.709</a> ( 1.000)         | <a href="#">0.660</a> ( 0.950)         | <a href="#">0.289</a> ( 0.610)         | <a href="#">0.366</a> ( 0.855)         |

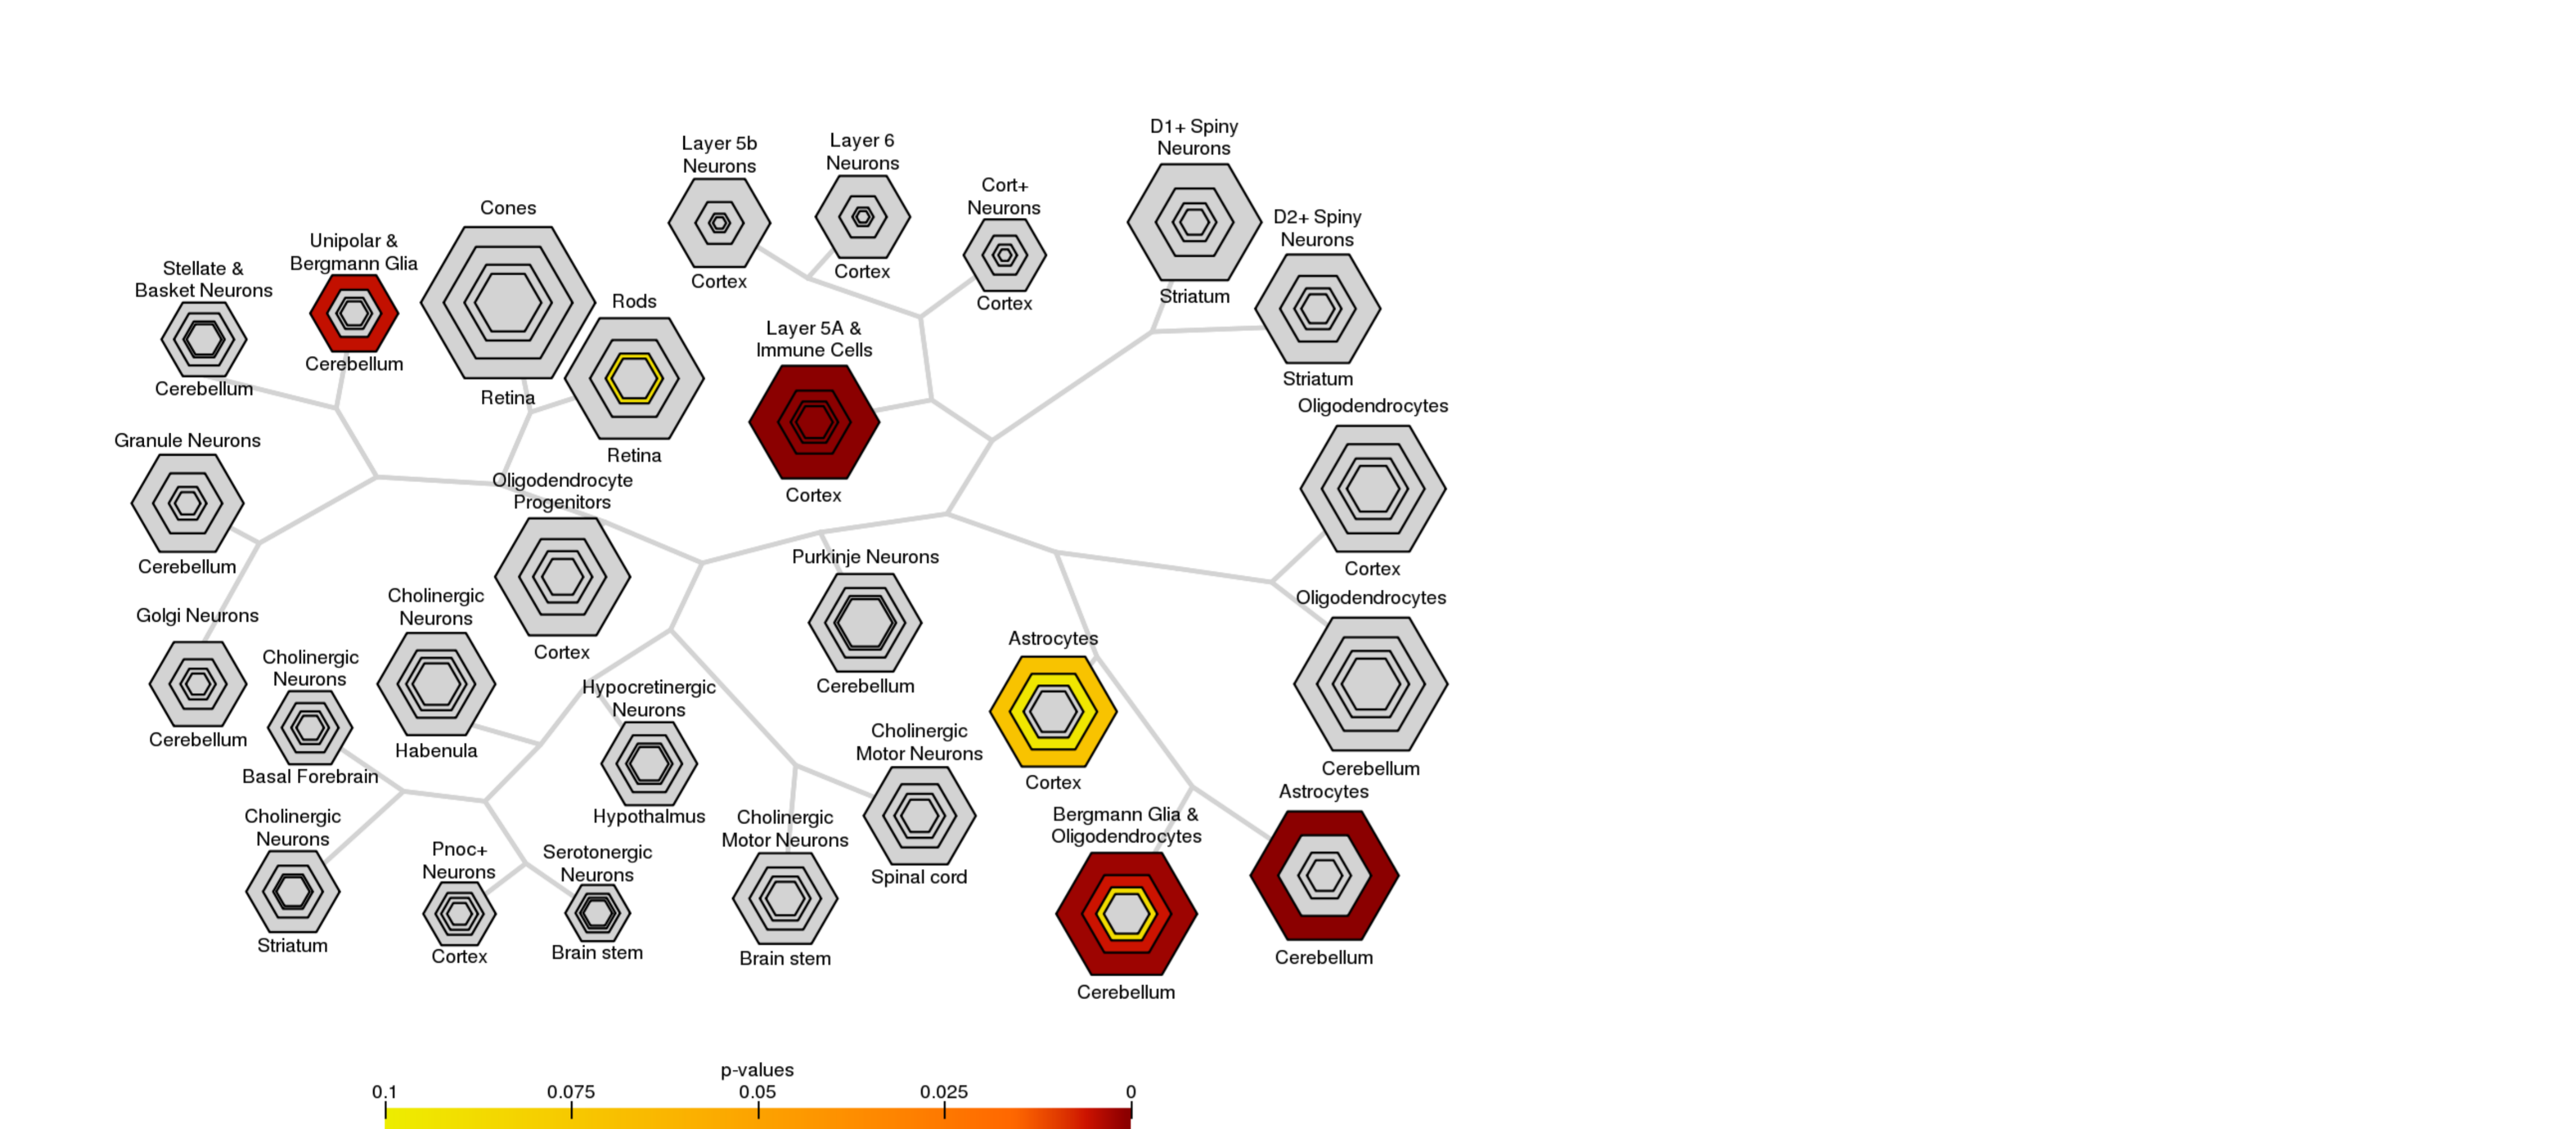

The overlapped genes for every cell type (pSI threshold 0.01) are:

RetR.Rods : SLC16A3, ALPL, AQP1, MYO7A, SEMA3F, SLC26A2, TNFAIP3, CP, SUSDS, ROM1  
Hyp : OXT, AVP, SYTL4, SELPLG, RASD1, RNASE6  
Hyp.Hcrt : IGFBP3, C2CD4B, IGHG1, TNFRSF12A, CASP1  
BF : IFITM3, OXT, MGP, TAGLN, AVP  
BF.Chat : IL1R2, RGS10, LST1, IGHG1  
BS : LY86, CALCB, TAL1  
BS.Chat : CALCB, CLIC1, TAGLN2, TNFRSF12A, CDA, LCP1, ANXA2  
BS.Slc6a4 : GPR4  
Cb : SLA, RPS6KA1, CNKSR3, MYBPC1  
Cb.Septin4 : CHI3L1, RHOD, SLC14A1, PLSCR1, HK2, CEBPD, EMP2, ANGPTL4, SLC04A1, CNM2, PXN, UCP2, CDKN1A, CASP1, GLI1, ARID5A, DENND3, CYBA, TIMP1, MYBPC1  
Cb.Pcp2 : RHOD, ALOX5AP, RTEL1, CCDC69  
Cb.Neurod1 : RPS6KA1, CNKSR3, UNC13D, BCL6  
Cb.Lypd6 : ST14, SLA, TIFA, TMEM204  
Cb.Grp : CTXN3, HK2, ANGPTL4, CXCL11, UCP2, SERPING1, CLEC1A  
Cb.Grm2 : ST14, LGI2  
Cb.Fthfd : CHI3L1, GSTT1, RHOD, VAMP8, HK2, IFITM2, EMP2, SLC04A1, CNM2, SERPING1, RRM2, CTXN3, LY96, DENND3, CYBA, SLC14A1  
Cb.Cnp : ITGB4, ADAMTSL4, TMPRSS5, ELOVL7, CSF1, ARRD3, PDLM1, RASL12, CLDN14, BACE2, CTSC, EFNA1  
Cpu : IDO1, INHBA, ARHGDI  
Cpu.D2 : IDO1, ACVRL1, ARHGDI, STC1  
Cpu.D1 : IDO1, CISH, ARHGDI, ACVRL1, STC1  
Cpu.Chat : CD44, CDA, IGHG1  
Cix : KLF10, STARD8  
Cix.Pdgfrajd340 : TAGLN2, ASF1B, CNM2, RRM2, IGFBP3, MELK, RASL12, AURKB, TOP2A, CDK2, BCL6B  
Cix.Etl1\_ts88 : PTPN6, TYROBP, CYTH4, ITGB2, CFH, PTGS1, FERMT3, STAB1, IGFBP2, CYBA, CD14, LYVE1, FCER1G, F13A1, STARD8, CD163, SLC11A1, CD68, CSF1R, LAPTM5, IFITM1, TNFAIP8L2, C1QC, C1QB, C1QA, CD163, CD14, LYVE1, MS4A7  
Cix.Ntsr : NNMT, ZBTB16  
Cix.Ntsr : none  
Cix.Gli25d2 : none  
Cix.Fthfd : PAPSS2, NUPR1, GFAP, EMP2, ANGPTL4, ID3, TIFA, ARID5A, NOTCH4  
Cix.Cort : none  
Cix.Cnp : ITGB4, ELOVL7, ARRD3, ADAMTSL4  
Epi : RASD1, TM4SF1, CTXN3, GPR4, RAMP3  
Epi.Chat : PSMB9, PSMB8, GPR4, CXCL11, NFAM1, WFIKKN2, IRX3  
Spc : S100A8, CSF1R, TYROBP, RASSF4, PTPRC, GFAP, EMP1, TMPRSS5, CALCB, ART3, TMEM119, VWF, LY86, CTSS, S100A8, PRX, ADAMTSL4, APLNR, ELOVL7, C3  
Spc.Chat : CALCB, LCP1, CFI, ANXA2  
RetC.Cones : SAMS1N1, MFNG, SLC1A7, HK2, RGR, CFH, SOCS3, PRAM1, MFNG, SERPING1, ARHGDI, GPSM3, ABI3, XIST, PIK3AP1, CEBPD

The overlapped genes for every cell type (pSI threshold 0.001) are:

RetR.Rods : SLC16A3, ALPL, AQP1, MYO7A, SEMA3F, TNFAIP3, CP, SUSDS, ROM1  
Hyp : OXT, AVP, SYTL4  
Hyp.Hcrt : IGFBP3, C2CD4B, IGHG1, CASP1  
BF : TAGLN  
BF.Chat : none  
BS : TAL1  
BS.Chat : CALCB, CDA, LCP1, ANXA2  
BS.Slc6a4 : none  
Cb : none  
Cb.Septin4 : SLC14A1, HK2, ANGPTL4, CNM2, UCP2, GLI1, DENND3, CEBPD, MYBPC1  
Cb.Pcp2 : none  
Cb.Neurod1 : RPS6KA1, CNKSR3  
Cb.Lypd6 : ST14, SLA, TMEM204  
Cb.Grp : CTXN3, CLEC1A, SERPING1  
Cb.Grm2 : ST14, LGI2  
Cb.Fthfd : GSTT1, CTXN3, SLC14A1, SLC04A1  
Cb.Cnp : ITGB4, ADAMTSL4, TMPRSS5, PDLM1, RASL12, CTSC  
Cpu : INHBA  
Cpu.D2 : IDO1, ACVRL1, ARHGDI  
Cpu.D1 : IDO1  
Cpu.Chat : CD44  
Cix : none  
Cix.Pdgfrajd340 : RRM2, MELK, TOP2A, TAGLN2, BCL6B  
Cix.Etl1\_ts88 : TYROBP, PTPN6, F13A1, CSF1R, STAB1, CYTH4, C1QC, C1QB, C1QA, CD163, CD14, LYVE1, MS4A7  
Cix.Ntsr : none  
Cix.Ntsr : none  
Cix.Gli25d2 : none  
Cix.Fthfd : EMP2, NUPR1, PAPSS2, ID3, ARID5A, TIFA  
Cix.Cort : none  
Cix.Cnp : ITGB4, ADAMTSL4  
Epi : RASD1, RAMP3  
Epi.Chat : NFAM1, GPR4, CXCL11, WFIKKN2, IRX3  
Spc : S100A8, PRX, C3  
Spc.Chat : CALCB, LCP1, CFI, ANXA2  
RetC.Cones : SAMS1N1, MFNG, SLC1A7, RGR, XIST, PIK3AP1

The overlapped genes for every cell type (pSI threshold 0.0001) are:

RetR.Rods : SLC16A3, ALPL, AQP1, SEMA3F, TNFAIP3, SUSDS, ROM1  
Hyp : OXT, AVP, SYTL4  
Hyp.Hcrt : C2CD4B, IGHG1  
BF : TAGLN  
BF.Chat : none  
BS : none  
BS.Chat : CALCB, CDA, LCP1, ANXA2  
BS.Slc6a4 : none  
Cb : none  
Cb.Septin4 : SLC14A1, HK2, CNM2, GLI1, UCP2, MYBPC1  
Cb.Pcp2 : none  
Cb.Neurod1 : RPS6KA1  
Cb.Lypd6 : ST14, SLA, TMEM204  
Cb.Grp : CTXN3, SERPING1  
Cb.Grm2 : ST14  
Cb.Fthfd : SLC14A1  
Cb.Cnp : TMPRSS5, CTSC, ADAMTSL4, ITGB4  
Cpu : none  
Cpu.D2 : IDO1  
Cpu.D1 : IDO1  
Cpu.Chat : none  
Cix : none  
Cix.Pdgfrajd340 : RRM2, MELK, TOP2A, TAGLN2, BCL6B  
Cix.Etl1\_ts88 : TYROBP, PTPN6, F13A1, CSF1R, STAB1, CYTH4, C1QC, C1QB, C1QA, CD163, CD14, MS4A7  
Cix.Ntsr : none  
Cix.Ntsr : none  
Cix.Gli25d2 : none  
Cix.Fthfd : EMP2, NUPR1, PAPSS2, ID3, ARID5A, TIFA  
Cix.Cort : none  
Cix.Cnp : ITGB4, ADAMTSL4  
Epi : RASD1, RAMP3  
Epi.Chat : NFAM1, GPR4, CXCL11, WFIKKN2, IRX3  
Spc : S100A8, PRX, C3  
Spc.Chat : CALCB, LCP1, CFI, ANXA2  
RetC.Cones : SAMS1N1, MFNG, SLC1A7, RGR, XIST, PIK3AP1
