# Supplementary material for: Molecular Landscape of Tourette’s Disorder
Source: Int J Mol Sci. 2023 Jan 11;24(2):1428. doi: 10.3390/ijms24021428 (PMC9865021; doi:10.3390/ijms24021428)
Supplement: Supplementary file 1 [file ijms-24-01428-s001.zip › supplementary Table S1.xlsx]

## Sheet: Sheet1
DatasetID	Evidence Level	Omics	Type	Title	Authors	PMID	Citation	Study cohort	Analysis	Method	Platform	Tissue	Criteria	Results	Group(sample)	Age	Ethnicity	DefinitionTrait	DefinitionControl	ExclusionCriteria	Medication	Comorbidity
Matsumoto2000	guiding	Genome	ChrAbnorm	Breakpoint sequences of an 1;8 translocation in a family with Gilles de la Tourette syndrome	Matsumoto N, David DE, Johnson EW, Konecki D, Burmester JK, Ledbetter DH, Weber JL.	11093278	Eur J Hum Genet. 2000 Nov;8(11):875-83. doi: 10.1038/sj.ejhg.5200549.	family, multiplex	Breakpoint mapping, Sequence analysis. We map the 8q22.1 breakpoint within the translocation family reported originally in PMID10551546. Here, we report the cloning and sequencing of both the chromosome 1 and 8 breakpoints from this family and the identification of the CBFA2T1 gene 11 kb distal of the 8q breakpoint.	FISH using BAC, cosmid and phage DNA; DNA sequencing	ABI 377 automated sequencer, ABI Prism™ BigDye Terminator Cycle Sequencing Ready Reaction Kit	lymphoblastoid cell line	A family was reported with a balanced chromosomal translocation t(1;8)(q21.1;q22.1) in family members with TS or tics. Although we did not find any genes that were directly disrupted by the breakpoints, we did identify the CBFA2T1 gene 11 kb distal to the 8q22.1 breakpoint and a sequence closely related to the KIAA0454 gene 21 kb proximal to the 1q21.1 breakpoint. This homologue may be an unproce…	1 gene	A nuclear family in which the father and six of the seven children shared the balanced (1;8) translocation [t(1;8)(q21.1;q22.1)]; Mutation analysis of the CBFA2T1 gene in 37 unrelated GTS patients.	NA	Causasian/Mixed	DSM-IV criteria for TS, ADHD. Of the six children with the translocation, one had TS, ADHD and OCD, one displayed modest tics, Asperger’s syndrome and ADHD, and two had mild tics, and the two youngest were unaffected but were also below the average age of onset.	NA	NA	NA	ADHD, OCD, Asperger’s syndrome
Petek2001	guiding	Genome	ChrAbnorm	Disruption of a novel gene (IMMP2L) by a breakpoint in 7q31 associated with Tourette syndrome	Petek E, Windpassinger C, Vincent JB, Cheung J, Boright AP, Scherer SW, Kroisel PM, Wagner K.	11254443	Am J Hum Genet. 2001 Apr;68(4):848-58. doi: 10.1086/319523. Epub 2001 Mar 9.	case report	Breakpoint mapping. Physical mapping and positional cloning	FISH		Blood	IMMP2L was found to be disrupted by both the breakpoint in the duplicated fragment and the insertion site in 7q31.	1 gene	1 GTS male with [dup(7)(q22.1- q31.1)]	13 year old	NA	DSM-III-R criteria for GTS. In addition to GTS features, such as involuntary motor and vocal tics, patient demonstrates slight mental and physical retardation, had reduced speech development, depression, strabismus convergens, a malformed left ear, meatus acusticus stenosis, slight microgenia, and considerable gynecomastia. His karyotype was 46,XY,dup(7)(pter-q31.1::q31.1-q22.1::q31.1-qter) de no…		NA	NA	Yes
Verkerk2003	guiding	Genome	ChrAbnorm	CNTNAP2 is disrupted in a family with Gilles de la Tourette syndrome and obsessive compulsive disorder	Verkerk AJ, Mathews CA, Joosse M, Eussen BH, Heutink P, Oostra BA; Tourette Syndrome Association International Consortium for Genetics.	12809671	Genomics. 2003 Jul;82(1):1-9. doi: 10.1016/s0888-7543(03)00097-1.	family, multiplex	Breakpoin mapping. We have investigated a GTS family with a complex chromosomal insertion/translocation involving chromosomes 2 and 7. To find genes crossing the breakpoints, the BAC sequences were screened for genes using the NCBI Blast database. BAC 641E23, crossing the breakpoint on chromosome 7q35–q36 and similarly present in the three patients, showed homology to the contactin-associated pro…	FISH		Blood	Inversion on 7q35–q36 in three affected individuals with TS from one family: The affected father and two affected children share a chromosome 2p21–p23 insertion on chromosome 7q35–q36, thereby interrupting the contactin-associated protein 2 gene (CNTNAP2).	1 gene	Affected father and two affected children.	NA	NA	DSM-IV criteria for TS. The father has no history of motor or vocal tics. He does have OCD and evidence of recurrent major depressive disorder. The mother is unaffected, but stutters. The daughter at age 5 years was found to have generalized developmental delay with specifically language delay, with an IQ of about 65, small stature, and microcephaly. She was noted to have inappropriate behaviors …	NA	NA	NA	OCD, MDD
Abelson2005	guiding	Genome	ChrAbnorm	Sequence variants in SLITRK1 are associated with Tourette's syndrome	Abelson JF, Kwan KY, O'Roak BJ, Baek DY, Stillman AA, Morgan TM, Mathews CA, Pauls DL, Rasin MR, Gunel M, Davis NR, Ercan-Sencicek AG, Guez DH, Spertus JA, Leckman JF, Dure LS 4th, Kurlan R, Singer HS, Gilbert DL, Farhi A, Louvi A, Lifton RP, Sestan N, State MW.	16224024	Science. 2005 Oct 14;310(5746):317-20. doi: 10.1126/science.1116502.	family, simplex (trios)	Breakpoint mapping. We identified a patient presenting with TS and ADHD and carrying a de novo chromosome 13 inversion, inv(13)(q31.1;q33.1) (16). There was no family history of tics, TS, OCD, TTM, or ADHD. Genotyping with multiple short tandem repeat (STR) markers confirmed paternity.The co-occurrence of a de novo chromosomal abnormality with the only known case of TS in the pedigree led us to f…	FISH		Blood	De novo inversion on chromosome 13 in a simplex family with a single case of TS. The gene SLITRK1 mapped to within 350 kb of the 13q31 breakpoint in this individual. ERCC5 and SLC10A2, mapping immediately centromeric and telomeric, respectively, to the 13q33.1 breakpoint, were not excluded as candidates but were considered less likely alternatives.	1 gene (ChrAbnorm_main), 2 genes (ChrAbnorm_ext)	1 family - proband with TS and ADHD		Caucasian (mostly)					ADHD
Breedveld2010	guiding	Genome	ChrAbnorm	Tourette disorder spectrum maps to chromosome 14q31.1 in an Italian kindred	Breedveld GJ, Fabbrini G, Oostra BA, Berardelli A, Bonifati V.	20437249	Neurogenetics. 2010 Oct;11(4):417-23. doi: 10.1007/s10048-010-0244-7. Epub 2010 May 2.	family, multiplex	For the linkage study, 382 short tandem repeat (STR) markers, defining a ten-centimorgan (cM) resolution autosomal map, were tested. Multi-point linkage analysis was performed using Allegro v1.2c [28] and easyLINKAGE Plus v5.02 [29] as graphical interface. Affected-only linkage analysis was carried out assuming equal recombination rates for males and females, equal allele frequencies (estimated f…	linkage analysis, sequencing	ABI Prism Linkage Mapping Set Version 2, ABI3130XL automated sequencer, Affymetrix GeneChip Human Mapping 250 K Nsp Arrays	Blood	Four-generation Italian kindred segregating TS, chronic multiple motor tics (CMT), and OCD, and we performed a ten-centimorgan (cM) genome-wide linkage scan in order to map the underlying genetic defect. Suggestive linkage to chromosome 14q31.1 (multipoint LOD=2.4) was detected by affected-only analysis under an autosomal dominant model and a narrower phenotype definition (only the subjects with …	7 genes (ChrAbnorm_main)	Thirty subjects (23 family members and seven spouses) belonging to four-generation Italian kindred segregating TS, chronic multiple motor tics (CMT), and OCD			A diagnosis of definite TS, definite chronic multiple motor tics (CMT), or definite nonspecific tic disorder (NST) was established in several family members according to the criteria of the Tourette Syndrome Classification Study Group. The OCD diagnosis was made by two psychiatrists, using the Structured Clinical Interview for DSM and the Yale–Brown Obsessive Compulsive Scale (Y-BOCS).
Patel2011	guiding	Genome	ChrAbnorm	Translocation breakpoint at 7q31 associated with tics: further evidence for IMMP2L as a candidate gene for Tourette syndrome	Patel C, Cooper-Charles L, McMullan DJ, Walker JM, Davison V, Morton J.	21386874	Eur J Hum Genet. 2011 Jun;19(6):634-9. doi: 10.1038/ejhg.2010.238. Epub 2011 Mar 9.	case report	Cytogenetic analyses in a male patient with Tourette syndrome-like tics found an apparently balanced de novo translocation [46,XY,t(2;7)(p24.2;q31)]. Further analysis using array comparative genomic hybridisation (CGH) revealed a cryptic deletion at 7q31.1–7q31.2. Breakpoints disrupting this region have been reported in one isolated and one familial case of Tourette syndrome. In our case, IMMP2L,…	Cytogenetic analyses, array CGH, FISH, MLPA of the CFTR gene	NimbleGen 12 × 135K arrays	Blood	The detailed molecular genetic analysis of an 18-year-old boy with a de novo translocation t(2;7)(p24.2;q31). The breakpoints were further characterised and the proximal breakpoint of the deletion occurs within introns 2–3 of the IMMP2L gene, and exons 1–3 are deleted. Exons 4–6 remain intact. The deleted region also contains 20 HGNC mapped genes, listed in Table 1 (NBCI 36) - ChAbnorm_ext.	1 gene (ChrAbnorm_main), 21 genes (ChrAbnorm_ext)	1 proband with GTS-like symptoms	18 year old male	EU	Current neurological findings include the tics, normal tone and power in all four limbs, but brisk deep tendon reflexes, and a broad-based unsteady gait. At age 13 years he developed a movement disorder consisting of head and eye turning to the right, facial grimacing and puffing of his cheeks. He was partially able to control this, but it appears to be worsening with age. He was seen by a paedia…	NA	NA	NA	moderate learning difficulties and severe speech difficulties
Hooper2012	guiding	Genome	ChrAbnorm	Genome-wide sequencing for the identification of rearrangements associated with Tourette syndrome and obsessive-compulsive disorder	Hooper SD, Johansson AC, Tellgren-Roth C, Stattin EL, Dahl N, Cavelier L, Feuk L.	23253088	BMC Med Genet. 2012 Dec 19;13:123. doi: 10.1186/1471-2350-13-123.	family/case report	Cytogenetic analysis revealed that both mother (affected by OCD) and son (affected by TS and OCS) carry an apparently balanced reciprocal chromosome translocation t(6;22)(q16.2;p13). The status of the father is unknown. To map the breakpoint(s) in more detail and to identify any related or additional sub-microscopic rearrangements, we performed whole genome mate-pair sequencing and high resolutio…	cytogenetic analysis, FISH, whole genome mate-pair sequencing, SNP array	SOLiD matepair sequencing, Affymetrix Genome-Wide SNP Genotyping 6.0 Array	Blood	We identified an apparently balanced t(6,22)(q16.2;p13) in a male patient with TS and OCD. Validation and further mapping by fluorescence in situ hybridization analysis (FISH) narrowed down the translocation breakpoint to a 2 Mb region on chromosome 6 (at the approximate position 95–96 Mbps), flanked by BAC clones RP11-419I4 on the proximal side and RP11-482 L14 on the terminal end. Sequence and …	3 genes	Proband and his mother	29 year old male	European ancestry (EU)	DSM-IV criteria for OCD and Tourette syndrome (proband TS and OCD, mother OCD)				OCD
Bertelsen2015	guiding	Genome	ChrAbnorm	A t(3;9)(q25.1;q34.3) translocation leading to OLFM1 fusion transcripts in Gilles de la Tourette syndrome, OCD and ADHD	Bertelsen B, Melchior L, Jensen LR, Groth C, Nazaryan L, Debes NM, Skov L, Xie G, Sun W, Brøndum-Nielsen K, Kuss AW, Chen W, Tümer Z.	25595337	Psychiatry Res. 2015 Feb 28;225(3):268-75. doi: 10.1016/j.psychres.2014.12.028. Epub 2014 Dec 30.	family, multiplex	Through cytogenetic screening of 176 GTS patients for microscopically visible chromosome rearrangements, we identified a t(3;9)(q25.1;34.3) translocation in a male patient (Bertelsenetal.,2013). The translocation was maternally inherited and the other investigated family members (II-1,I-3,I-4,II-4) had normal karyotypes. Thus,the translocation was de novo in the mother. The translocation breakpoi…	Chromosome analysis, mate-mair sequencing, microarray, qPCR, sanger sequencing		Blood	In a male patient with TS, OCD, ADHD, and other comorbidities, a translocation t(3;9)(q25.1;q34.3) inherited from a mother with tics was found. Mate-pair sequencing revealed that the translocation breakpoints truncated the olfactomedin 1 (OLFM1) gene and two uncharacterized transcripts.	1 gene	176 unrelated Danish patients, including one proband from a pedigree with the t(3;9)translocation.	21 year old male	European ancestry (EU)	DSM-IV-TR criteria for GTS . Proband has diagnoses of OCD and GTS, as well as ADHD, depression, anxiety and rage attacks, and he suffers from sleeping difficulties and emotional problems. The mother has a single complex motor tic, she did not meet the diagnostic criteria for GTS, ADHD or OCD.The father does not have any symptoms of GTS, ADHD or OCD. .According to the proband's mother,one of the m…	NA	NA	Yes	Yes
Lawson-Yuen2008	guiding	Genome	CNV	Familial deletion within NLGN4 associated with autism and Tourette syndrome	Lawson-Yuen A, Saldivar JS, Sommer S, Picker J.	18231125	Eur J Hum Genet. 2008 May;16(5):614-8. doi: 10.1038/sj.ejhg.5202006. Epub 2008 Jan 30.	family, multiplex	A chromosome microarray (Signature Genomics Laboratory) revealed a small deletion at Xp22.3. No other deletions or abnormalities were detected by the microarray. The deletion was located approximately 1Mb from the steroid sulfatase locus, leaving this region intact. To further delineate the nature of the deletion, we proceeded with analysis of the NLGN4 gene located at Xp22.33. This revealed a de…	microarray, sequencing		Blood	Familial deletion within NLGN4 is associated with autism and TS	1 gene	Two brothers: one with autism and a motor tic, and one with TS and ADHD. Carrier mother has Learning Disability, depression, and anxiety.	7 and 9 years old	European ancestry (EU)	DSM-IV criteria for the diagnosis of autism, TS, ADHD
Sundaram2010	guiding	Genome	CNV	Tourette syndrome is associated with recurrent exonic copy number variants	Sundaram SK, Huq AM, Wilson BJ, Chugani HT.	20427753	Neurology. 2010 May 18;74(20):1583-90. doi: 10.1212/WNL.0b013e3181e0f147. Epub 2010 Apr 28.	family, simplex (trios), case-control		SNP array	Illumina 610 Quad	Blood	Genes implicated through the 5 rare exon-affecting CNVs that are either de novo or recurrent (present in 10 out of 111 patients with TS but were not found in 73 ethnically matched controls or in the entries of the Database of Genomic Variants in the TS population), listed in Table 1 (Sundaram2010_main)	7 genes (Sundaram2010_main)	118 (Parents: 30 out of 118 patients with TS had both parents genotyped, 40 had 1 parent genotyped, and 48 had no parental data); 73 controls	NA	European ancestry (EU)	The following criteria were used to establish a diagnosis of TS: 1) motor tics fluctuating for more than 2 years; and 2) presence of vocal tics. Comorbid OCD and ADHD and family information were evaluated and diagnosed by the pediatric neurologist who made the initial diagnosis of TS. No formal diagnostic instruments were used for this purpose or to exclude the presence of autism or mental retard…	Control	Patients diagnosed with various other conditions associated with TS (e.g., autism) or other established chromosomal disorders (except ADHD and OCD) were excluded from the present study.	NA	OCD, ADHD (46 subjects had TS only without OCD and ADHD, 16 subjects had comorbid ADHD, 27 subjects had comorbid OCD, and 29 subjects had comorbid OCD and ADHD. No subject had comorbid autism)
Fernandez2012	guiding	Genome	CNV	Rare copy number variants in tourette syndrome disrupt genes in histaminergic pathways and overlap with autism	Fernandez TV, Sanders SJ, Yurkiewicz IR, Ercan-Sencicek AG, Kim YS, Fishman DO, Raubeson MJ, Song Y, Yasuno K, Ho WS, Bilguvar K, Glessner J, Chu SH, Leckman JF, King RA, Gilbert DL, Heiman GA, Tischfield JA, Hoekstra PJ, Devlin B, Hakonarson H, Mane SM, Günel M, State MW.	22169095	Biol Psychiatry. 2012 Mar 1;71(5):392-402. doi: 10.1016/j.biopsych.2011.09.034. Epub 2011 Dec 14.	family, simplex (trios)	Genotypic data from all samples were processed by three CNV detection algorithms: PennCNV (Rev. 220) (53), QuantiSNP (v1.1) (54), and GNOSIS (38). The results of all three algorithms were analyzed and merged using the program CNVision.	SNP array	Illumina HumanCNV 370v1-duo, Illumina HumanOmni1-Quad, Illumina HumanCNV 370v1-duo, Illumina Human1M-Duo v1, Human 1M-Duo v3	Blood, lymphoblastoid cell lines	CNVs detected in at least two TS cases (recurrent) listed in Table 3 (Fernandez2012_main). Extended: Table S2 (select de novo and TS) Given both the trend toward larger and more gene-rich de novo CNVs in cases versus controls in this study and strong evidence from studies in ASD, demonstrating that these CNVs carry significant risk, we detected four de novo CNVs which were subsequently all confir…	26 genes (Fernandez2012_main), 554 genes (Fernandez2012_ext)	TD: 460 (148 parent-child trios), Control: 1131 (4366 trios); Controls - Simons Simplex Collection (SSC); Cases - United States cases were recruited through the Yale Child Study Center (n = 309), Cincinnati Children’s Hospital Medical Center (n = 157), and Rutgers (n = 36) (1); Netherlands cases were recruited through Accare Groningen (n = 143).		European ancestry (EU)	DSM-IV-TR criteria for Tourette’s Disorder and their parents, if available	Unrelated heallty subjects, showed no evidence of ASD (for SSC cohort)	NA	NA	NA
Nag2013	guiding	Genome	CNV	CNV analysis in Tourette syndrome implicates large genomic rearrangements in COL8A1 and NRXN1	Nag A, Bochukova EG, Kremeyer B, Campbell DD, Muller H, Valencia-Duarte AV, Cardona J, Rivas IC, Mesa SC, Cuartas M, Garcia J, Bedoya G, Cornejo W, Herrera LD, Romero R, Fournier E, Reus VI, Lowe TL, Farooqi IS; Tourette Syndrome Association International Consortium for Genetics, Mathews CA, McGrath LM, Yu D, Cook E, Wang K, Scharf JM, Pauls DL, Freimer NB, Plagnol V, Ruiz-Linares A.	23533600	PLoS One. 2013;8(3):e59061. doi: 10.1371/journal.pone.0059061. Epub 2013 Mar 22.	case–control	PennCNV; To make the final CNV calls, we used the following criteria: (i) we merged neighbouring CNVs when the distance separating them was less than half of the total distance from the start of the first CNV to the end of the second CNV, (ii) we only called CNVs containing at least 10 SNPs, and (iii) we ignored CNVs located in centromeric and telomeric regions. The CNV burden for each sample was…	SNP array	Illumina Human660	Blood	Genes implicated through recurrent large (>500 kb) CNVs overlapping annotated gene exons in at least two TS cases and not in controls listed in Table 2 and smaller CNVs (<500 kb) overlapping gene exons in at least two TS cases but not in controls listed in Table 3 (Nag2013_main). Genes implicated through 18 large (>500 kb) CNVs overlapping annotated gene exons of 13 genes in TS cases but not in c…	12 genes (Nag2013_main), 38 genes (Nag2013_ext)	TS: 210 (179 after QC), Control: 285 (234 after QC) from Neuropaediatrics Clinic of Hospital Universitario San Vicente de Paúl (Antioquia, Colombia) and Hospital Nacional de Niños (San José, Costa Rica)	mean 13 (cases)	Latin American	DSM-IV criteria for TS, focusing on narrowly defined moderate to severe TS, unrelated cases	Unrelated population controls	NA	NA	ADHD (48% of cases), OCD (53% of cases)
Melchior2013	guiding	Genome	CNV	Microduplication of 15q13.3 and Xq21.31 in a family with Tourette syndrome and comorbidities	Melchior L, Bertelsen B, Debes NM, Groth C, Skov L, Mikkelsen JD, Brøndum-Nielsen K, Tümer Z.	23894120	Am J Med Genet B Neuropsychiatr Genet. 2013 Dec;162B(8):825-31. doi: 10.1002/ajmg.b.32186. Epub 2013 Jul 27.	family, multiplex	Raw data were processed using Affymetrix Chromosome Analysis Suite software (ChAS) with the following filter settings: five markers and 5 kb for deletions; 10 markers and 10 kb for duplications; and confidence limit > 85%. The data were interpreted with the aid of the UCSC Genome Browser (http://genome.ucsc.edu; GRCh37/hg19 assembly). Real-time quantitative PCR (qPCR) was carried out to verify th…	SNP array, qPCR	Affymetrix CytoScan HD	Blood	In family with TS, OCD, and ADHD, we identified a microduplication at 15q13.3 (including the CHRNA7 gene) and genomic variations at 15q13.2 (including the CHRFAM7A gene) together with a microduplication at Xq21.31 (including the PABPC5 and the PCDH11X genes). Specifically, in a male patient with TS, ADHD, and OCD we identified two microduplications (at 15q13.3 and Xq21.31) inherited from a mother…	3 genes (Melchior2013_main)	Four generational family with 17 members (SNP array only on index patient, qPCR to verify the duplications in the index patient and to investigate all the other family members for the presence of the same duplications)	NA	European ancestry (EU)	DSM-IV-TR criteria for TS. The proband is the youngest of four sons of unrelated parents. He started to have tics when he was 7.5 years old and at the age of 8 years methylphenidate treatment was initiated for his ADHD symptoms. He also had OCD and rage attacks, but did not have seasonal affective disorder, depression, sleeping disturbances or stuttering. His dizygotic twin brother started to hav…	NA	NA	Yes	OCD, OCB, ADHD, rage attacks
McGrath2014	guiding	Genome	CNV	Copy number variation in obsessive-compulsive disorder and tourette syndrome: a cross-disorder study	McGrath LM, Yu D, Marshall C, Davis LK, Thiruvahindrapuram B, Li B, Cappi C, Gerber G, Wolf A, Schroeder FA, Osiecki L, O'Dushlaine C, Kirby A, Illmann C, Haddad S, Gallagher P, Fagerness JA, Barr CL, Bellodi L, Benarroch F, Bienvenu OJ, Black DW, Bloch MH, Bruun RD, Budman CL, Camarena B, Cath DC, Cavallini MC, Chouinard S, Coric V, Cullen B, Delorme R, Denys D, Derks EM, Dion Y, Rosário MC, Eap…	25062598	J Am Acad Child Adolesc Psychiatry. 2014 Aug;53(8):910-9. doi: 10.1016/j.jaac.2014.04.022. Epub 2014 Jun 24.	family, simplex (trios), case-control	PennCNV and iPattern using hg18 genomic coordinates. CNV burden, region-specific analyses, and permutations were performed in PLINK using the rare CNV function.	SNP array	Illumina Human610-Quadv1_B, Illumina Human-Hap1Mv1_C	Blood	Genes implicated through the most frequently observed neurodevelopmental CNVs in patients with OCD/TS compared to controls that were located at 16p13.11 (Figue 1), 22q11, and PARK2 (16p13.11 region contained both a de novo CNV (del) and the largest patient/control difference across the genome), and genes implicated through the region specific association analysis in TS,where the 3p26.3 region had…	72 genes (McGrath2014_ext)	Cases: 2699 (total after QC) including 1613 OCD after QC; 327 cases and 21 affected siblings had parents available for de novo analysis (n=348 total trios) and 1086 TS after QC. Controls: 1789	NA	EU (n=4410); Brazil, Mexico, and Costa Rica (n=78)	DSM-IV-TR-diagnoses of TS/OCD	Ancestry-matched controls collected parallel with cases and EU-ancestry controls from SAGE obtained through dbGaP	Recruitment sites varied in screening and exclusions related to other neurodevelopmental disorders; see Supplementary Tables S9, S10, S11, for available clinical information regarding ID, ASD, ADHD, and seizures. SAGE controls were excluded for lifetime substance dependence but were not screened for other psychopathology.	NA	TS or chronic tics (CT) were assessed in 57% of OCD probands using DSM-IV-TR criteria. Of those assessed, TS was present in 10% of patients with OCD, and an additional 5% had CT. OCD as defined by DSM-IV-TR criteria was assessed in 88% of TS cases; OCD was present in 46% of assessed TS individuals.
Prontera2014	guiding	Genome	CNV	DPP6 gene disruption in a family with Gilles de la Tourette syndrome	Prontera P, Napolioni V, Ottaviani V, Rogaia D, Fusco C, Augello B, Serino D, Parisi V, Bernardini L, Merla G, Cavanna AE, Donti E.	25129042	Neurogenetics. 2014 Oct;15(4):237-42. doi: 10.1007/s10048-014-0418-9. Epub 2014 Aug 17.	family, multiplex	Copy number analysis was performed using the Chromosome Analysis Suite software (ChAS, v1.2.1; Affymetrix), by filtering CNVs with a minimum size of 10 kb and 5 consecutive markers. A total of 270 control samples from the International HapMap Project (http://www. hapmap.org/) were selected as reference model file for comparison. A microdeletion of ∼146 kb at the 7q36.2 locus, from 153, 513, and 3…	SNP array, FISH, qPCR	BluGnome Cytochip 4x180K, Affymetrix CytoScan HD	Blood	Genomic rearrangement: a microdeletion of ∼135 kb at the 7q36.2 locus was present in the three TS relatives and involved only the DPP6 gene, leading to the deletion of the first exon and part of the first intron, segregating with the disease.	1 gene (Prontera2014_main)	The patient is an 8-year-old boy, the only child of unrelated parents. The family history from the maternal side was unremarkable, while recurrentmotor tics and ADHD were referred in the 42-year-old father and in the 38-year-old paternal uncle. The 73-year-old paternal grandmother had never suffered from tics, whereas the paternal grandfather, who died at 71, had been described as hyperactive sho…	8 years (proband)	European ancestry (EU)	K-SADS-PL evaluation: the proband resulted positive for chronic and multiple motor and vocal tics and for ADHD, thus prompting the diagnosis of TS. Proband’s parents, the paternal grandmother, and the paternal uncle were also interviewed using K-SADS-PL. Proband’s father resulted positive for chronic tic disorder and for ADHD in relation to past scoring, and for transient tic disorder in relation…	NA	NA	NA	ADHD
Huang2017	guiding	Genome	CNV	Rare Copy Number Variants in NRXN1 and CNTN6 Increase Risk for Tourette Syndrome	Huang AY, Yu D, Davis LK, Sul JH, Tsetsos F, Ramensky V, Zelaya I, Ramos EM, Osiecki L, Chen JA, McGrath LM, Illmann C, Sandor P, Barr CL, Grados M, Singer HS, Nöthen MM, Hebebrand J, King RA, Dion Y, Rouleau G, Budman CL, Depienne C, Worbe Y, Hartmann A, Müller-Vahl KR, Stuhrmann M, Aschauer H, Stamenkovic M, Schloegelhofer M, Konstantinidis A, Lyon GJ, McMahon WM, Barta C, Tarnok Z, Nagy P, Bat…	28641109	Neuron. 2017 Jun 21;94(6):1101-1111.e7. doi: 10.1016/j.neuron.2017.06.010.	case-control	We measured global CNV burden using three separate metrics: the number of rare CNVs (CNV count), the total length of all CNVs (CNV length) and the total number of genes intersected by CNVs (CNV gene count). We tested large (> 1Mb), singleton CNVs that affect conserved genes (pLI > 0.9), stratified by CNV type, and compared the relative risk of such events to all large, singleton genic CNVs. For a…	SNP array	Illumina OmniExpress	Blood	Genes implicated through two individual, genome-wide significant loci, each conferring a substantial increase in TS risk (NRXN1 deletions, OR = 20.3, 95% CI [2.6– 156.2]; CNTN6 duplications, OR = 10.1, 95% CI [2.3–45.4]). In total, we resolved 9,375 rare CNVs (Table S4).	2 genes (Huang2017_main)	TS: 2434, Control: 4093; Tourette Syndrome Association International Consortium for Genetics (TSAICG) and the Gilles de la Tourette Syndrome GWAS Replication Initiative (GGRI), with additional controls selected from external studies	NA	European ancestry (EU)	TICS Inventory, DSM-IV criteria for TS, OCD, ADHD	Ancestry-matched controls	TSAICG: Individuals with a history of intellectual disability, seizure disorder, or a known tic disorder unrelated to TS were excluded.
Wang2018_CNV	guiding	Genome	CNV	De Novo Sequence and Copy Number Variants Are Strongly Associated with Tourette Disorder and Implicate Cell Polarity in Pathogenesis	Wang S, Mandell JD, Kumar Y, Sun N, Morris MT, Arbelaez J, Nasello C, Dong S, Duhn C, Zhao X, Yang Z, Padmanabhuni SS, Yu D, King RA, Dietrich A, Khalifa N, Dahl N, Huang AY, Neale BM, Coppola G, Mathews CA, Scharf JM; Tourette International Collaborative Genetics Study (TIC Genetics); Tourette Syndrome Genetics Southern and Eastern Europe Initiative (TSGENESEE); Tourette Association of America I…	30257206	Cell Rep. 2018 Sep 25;24(13):3441-3454.e12. doi: 10.1016/j.celrep.2018.08.082.	family, simplex (trios)	We identified de novo CNVs from whole exome sequencing data using CoNIFER and the standard workflow. We generated a list of high confidence de novo CNVs by implementing additional filtering criteria on raw de novo CNVs, including: 1) not detected in both parents (i.e., without any overlap); 2) less than 50% overlap with common CNVs (MacDonald et al., 2014); 3) less than 50% overlap with telomeric…	SNP array	HumanOmniExpressExome-8-v1, Illumina Human-Omni	Blood, lymphoblastoid cell lines, saliva	Genes mapped to true de novo CNVs validated with qPCR: in WES data - 15 validated de novo CNVs, in microarray data - 9 confirmed CNVs, listed in Table S5 with the column Confirmation Status in this study selected to 'TRUE'.	391 unique genes mapped to de novo validated with qPCR CNVs from WES and array data (Wang2018_ext), listed in Table S5. Only included in extended list as the CNVs were not recurrent.	TS: 412 trios (399 trios after QC), Control: 765 (763 after QC) SSC quartets previously genotyped (microarray); WES as in SNV	NA		DSM-IV-TR criteria for TD or a chronic tic disorder	NA	NA	NA	OCD, ADHD
Maccarini2020	guiding	Genome	CNV	Inherited duplication of the pseudoautosomal region Xq28 in a subject with Gilles de la Tourette syndrome and intellectual disability: a case report	Maccarini S, Cipani A, Bertini V, Skripac J, Salvi A, Borsani G, Marchina E.	32582378	Mol Cytogenet. 2020 Jun 22;13:23. doi: 10.1186/s13039-020-00493-3. eCollection 2020.	case report	Cytogenetic analysis, FISH	Cytogenetic analysis, FISH, Array-CGH analysis	Oxford Gene Technology 4x180K platform	Blood	Case of a 12-year-old girl diagnosed with TS associated to behavior disorders and intellectual disability in particular with regard to language. Array-CGH analysis showed a CNV of a subtelomeric region Xq28 (gain of 260 kb) inherited from the healthy father, that results in a trisomy for the region involved.. The duplication contains two genes, VAMP7 and SPRY3 of the PAR2 pseudoautosomal region.	2 genes (Maccarini2020_main)	Proband	12 year old female	European ancestry (EU)	The proband, a 12 and a half years old female, is the only daughter of healthy and non-consanguineous Caucasian parents.
Cao2021_CNV	guiding	Genome	CNV	Whole-exome sequencing identifies genes associated with Tourette's disorder in multiplex families	Cao X, Zhang Y, Abdulkadir M, Deng L, Fernandez TV, Garcia-Delgar B, Hagstrøm J, Hoekstra PJ, King RA, Koesterich J, Kuperman S, Morer A, Nasello C, Plessen KJ, Thackray JK, Zhou L; Tourette International Collaborative Genetics Study (TIC Genetics), Dietrich A, Tischfield JA, Heiman GA, Xing J.	33837273	Mol Psychiatry. 2021 Apr 9:10.1038/s41380-021-01094-1. doi: 10.1038/s41380-021-01094-1. Online ahead of print.	Family, multiplex	Genotype calling and CNV detection were performed as previously described [40]. A pCNV threshold of ≤0.05 was used for initial selection of CNVs. CNV annotation was performed by CNVision (CNVision merges CNV calls from three algorithms: PennCNV, QuantiSNP, and GNOSIS), AnnotSV, and a custom program for inheritance pattern analysis. CNVs that are smaller than 1000 base pairs or larger than 2 milli…	SNP array	Illumina HumanOmni1-Quad, OmniExpressExome BeadChip	Blood	A total of 1799 high-quality CNVs were identified, with an average of 200 CNVs per family (ranging from 116 to 289). The majority of the CNVs were unique to one individual. After filtering on the segregation pattern, gene overlap, and the CNV size, we obtained 22 genic CNVs, including 16 exonic CNVs, listed in Table S5 (54 unique genes mappped to 22 genic CNVs are in Cao2021_ext). Risk genes pred…	3 genes (Cao2021_main), 54 genes (Cao2021_ext)	9 TIC Genetics multiplex families		European ancestry (white)	DSM-IV-TR or DSM-5 criteria for TD/tic disorder. In this study, a TD-affected individual is defined as an individual who was diagnosed with TD or other tic disorders (i.e., chronic motor or vocal tic disorder, a combined subtype, transient tic disorder or tic disorder-not otherwise specified).	NA	NA	NA	OCD, ADHD
Yu2019_GWASCat	guiding	Genome	GWAS, Cross-disorder	Interrogating the Genetic Determinants of Tourette's Syndrome and Other Tic Disorders Through Genome-Wide Association Studies		30818990	Am J Psychiatry. 2019 Mar 1;176(3):217-227. doi: 10.1176/appi.ajp.2018.18070857.	case-control and family based	NA	SNP array	Various Illumina platforms listed in TableS1.	Blood, cell lines	Unique genes mapped to SNPs with p-value <1.0x10-5 in the overall (primary GWAS + replication) population.	29 genes	4819 TS cases, 9488 controls (primary TS GWAS meta-analysis); 706 TS cases and 6068 controls (targeted replication - 39 LD independent SNPs in the independent deCODE sample).	NA	European ancestry (EU)	DSM-IV-TR criteria for TS (GWAS1 and TIC), DSM-5 criteria for a lifetime history of TS (GWAS2), DSM-IV-TR criteria for Chronic Motor or Vocal Tic Disorder (TAAICG). Other psychiatric diagnoses were not excluded. OCD and ADHD were also assessed.	ancestry-matched	A history of intellectual disability, and genetic or neurological disorders that caused tics or movement disorder phenocopies (e.g., epilepsy, known chromosomal abnormalities, etc.) (GWAS2)	NA	OCD, ADHD
CDGPGC2019	guiding	Genome	GWAS, Cross-disorder	Genomic Relationships, Novel Loci, and Pleiotropic Mechanisms across Eight Psychiatric Disorders	Cross-Disorder Group of the Psychiatric Genomics Consortium. Electronic address: plee0@mgh.harvard.edu; Cross-Disorder Group of the Psychiatric Genomics Consortium.	31835028	Cell. 2019 Dec 12;179(7):1469-1482.e11. doi: 10.1016/j.cell.2019.11.020.	case-control, family	Cross-disorder GWAS meta-analysis of 8 psychiatric disorders: AN, ADHD, ASD, BIP, MD, OCD, SCZ, TS	SNP array	Various Illumina platforms	Blood, cell lines	Candidate genes with m-value for TS >0.9 (CDGPGC2019_main) and >0.8 (CDGPGC2019_ext) that were mapped to 146 independent genome-wide significant lead SNPs associated with at least one disorder, listed in Table S3.1 in columns: nearestGene (100kb) and CandidateGene. m-value is a posterior probability of association with each individual disorder estimated using a Bayesian statistical framework; a s…	54 genes (CDGPGC2019_main), 161 genes (CDGPGC2019_ext)	232,964 cases and 494,162 controls from GWAS of: anorexia nervosa (AN; 3,495 cases), attention-deficit/hyperactivity disorder (ADHD; 19,009 cases), autism spectrum disorder (ASD; 18,381 cases), bipolar disorder (BIP; 20,352 cases), major depression (MD; 130,664 cases), obsessive-compulsive disorder (OCD; 2,688 cases), schizophrenia (SCZ; 33,640 cases), and Tourette syndrome (TS; 4,645 cases)	NA	European ancestry (EU)		ancestry-matched	A history of intellectual disability, and genetic or neurological disorders that caused tics or movement disorder phenocopies (e.g., epilepsy, known chromosomal abnormalities, etc.) (GWAS2)	NA	OCD, ADHD
Reay2020	guiding	Genome	GWAS, Cross-disorder	Pairwise common variant meta-analyses of schizophrenia with other psychiatric disorders reveals shared and distinct gene and gene-set associations	Reay WR, Cairns MJ.	32398653	Transl Psychiatry. 2020 May 12;10(1):134. doi: 10.1038/s41398-020-0817-7.	case-control, family	Cross-disorder pairwise GWAS meta-analysis at the gene level in MAGMA (5-kb upstream, 1.5-kb downstream) for SCZ with 7 psychiatric disorders: ED, ADHD, ASD, BIP, MD, OCD, TS.	SNP array	Various Illumina platforms	Blood, cell lines	Supplementary Table 12 - Genes only Bonferroni significant in disorder-wise meta-analyses with schizophrenia (P < 0.05 in both univariate MAGMA)	37 genes
Peyrot2021	guiding	Genome	GWAS, Cross-disorder	Identifying loci with different allele frequencies among cases of eight psychiatric disorders using CC-GWAS	Peyrot WJ, Price AL.	33686288	Nat Genet. 2021 Apr;53(4):445-454. doi: 10.1038/s41588-021-00787-1. Epub 2021 Mar 8.	case–case	Case-case GWAS (CC-GWAS) of 8 psychiatric disorders: AN, ADHD, ASD, BIP, MD, OCD, SCZ, TS	SNP array	Various Illumina platforms	Blood, cell lines	Unique protein coding genes mapped to significant CC-GWAS loci for pairs of TS with any of the eight psychiatric disorders, listed in Supplementary Table 13 (Payrot2021_main). CC-GWAS reports a SNP as statistically significant if it achieves p<5x10−8 using CC-GWASOLS weights and p<10−4 using CC-GWASExact weights (all statistical tests are two-sided).	25 genes	232,964 cases and 494,162 controls from GWAS of: anorexia nervosa (AN; 3,495 cases), attention-deficit/hyperactivity disorder (ADHD; 19,009 cases), autism spectrum disorder (ASD; 18,381 cases), bipolar disorder (BIP; 20,352 cases), major depression (MD; 130,664 cases), obsessive-compulsive disorder (OCD; 2,688 cases), schizophrenia (SCZ; 33,640 cases), and Tourette syndrome (TS; 4,645 cases)	NA	European ancestry (EU)		ancestry-matched	A history of intellectual disability, and genetic or neurological disorders that caused tics or movement disorder phenocopies (e.g., epilepsy, known chromosomal abnormalities, etc.) (GWAS2)	NA	OCD, ADHD
Yang2021	guiding	Genome	GWAS, Cross-disorder	Investigating Shared Genetic Basis Across Tourette Syndrome and Comorbid Neurodevelopmental Disorders Along the Impulsivity-Compulsivity Spectrum	Yang Z, Wu H, Lee PH, Tsetsos F, Davis LK, Yu D, Lee SH, Dalsgaard S, Haavik J, Barta C, Zayats T, Eapen V, Wray NR, Devlin B, Daly M, Neale B, Børglum AD, Crowley JJ, Scharf J, Mathews CA, Faraone SV, Franke B, Mattheisen M, Smoller JW, Paschou P.	33714545	Biol Psychiatry. 2021 Sep 1;90(5):317-327. doi: 10.1016/j.biopsych.2020.12.028. Epub 2021 Jan 8.	case-control, family	Cross-disorder GWAS meta-analysis of ((1) TS, ADHD, ASD and (2) TS and OCD) using ASSET	SNP array	Various Illumina platforms	Blood, cell lines	For the Yang2021_main list we selected: (1) from SNP-based cross-disorder GWAS meta-analyses of ADHD-ASD-TS and OCD-TS, genes mapped to genome-wide significant regions harboring pleiotropic loci listed in Table S3 with TS m-value >=0.9 (9 genes for ADHD-ASD-TS and 1 gene for OCD-TS); (2) from gene-based cross-disorder GWAS meta-analyses in MAGMA/FUMA, significant (Bonferroni corr) genes listed in…	33 genes (Yang2021_main), 37 genes (Yang2021_ext)	93,294 samples (51,311 controls)	NA	European ancestry (EU)		ancestry-matched	A history of intellectual disability, and genetic or neurological disorders that caused tics or movement disorder phenocopies (e.g., epilepsy, known chromosomal abnormalities, etc.) (GWAS2)	NA	OCD, ADHD
Yu2019_FUMA	guiding	Genome	GWAS, FUMA	Interrogating the Genetic Determinants of Tourette's Syndrome and Other Tic Disorders Through Genome-Wide Association Studies		30818990	NA	case-control and family based	FUMA	SNP array	Various Illumina platforms listed in TableS1.	Blood, cell lines	Unique genes mapped by combining three mapping strategies: positional, eQTL and 3D chromatin interaction mappings in FUMA. Specifically, for positional mapping, SNPs were mapped to known protein coding genes in the human reference assembly (GRCh37/hg19) based on physical distance of 10kb windows on both sides. For eQTL and chromatin interaction mappings, we performed analyses (1) across all avail…	234 genes (FUMA_AWOF: 232 genes, FUMA_AWF: 95 genes, FUMA_BWOF: 97 genes, FUMA_BWF: 40 genes)	4819 TS cases, 9488 controls	NA	European ancestry (EU)	DSM-IV-TR criteria for TS (GWAS1 and TIC), DSM-5 criteria for a lifetime history of TS (GWAS2), DSM-IV-TR criteria for Chronic Motor or Vocal Tic Disorder (TAAICG). Other psychiatric diagnoses were not excluded. OCD and ADHD were also assessed.	ancestry-matched	A history of intellectual disability, and genetic or neurological disorders that caused tics or movement disorder phenocopies (e.g., epilepsy, known chromosomal abnormalities, etc.) (GWAS2)	NA	OCD, ADHD
Yu2019_MAGMA	guiding	Genome	GWAS, MAGMA	Interrogating the Genetic Determinants of Tourette's Syndrome and Other Tic Disorders Through Genome-Wide Association Studies	Yu D, Sul JH, Tsetsos F, Nawaz MS, Huang AY, Zelaya I, Illmann C, Osiecki L, Darrow SM, Hirschtritt ME, Greenberg E, Muller-Vahl KR, Stuhrmann M, Dion Y, Rouleau G, Aschauer H, Stamenkovic M, Schlögelhofer M, Sandor P, Barr CL, Grados M, Singer HS, Nöthen MM, Hebebrand J, Hinney A, King RA, Fernandez TV, Barta C, Tarnok Z, Nagy P, Depienne C, Worbe Y, Hartmann A, Budman CL, Rizzo R, Lyon GJ, McMa…	30818990	NA	case-control and family based	MAGMA	SNP array	Various Illumina platforms listed in TableS1.	Blood, cell lines	Unique genes mapped with MAGMA 0kb or MAGMA 100kb with p-value <0.001.	113 genes	4819 TS cases, 9488 controls	NA	European ancestry (EU)	DSM-IV-TR criteria for TS (GWAS1 and TIC), DSM-5 criteria for a lifetime history of TS (GWAS2), DSM-IV-TR criteria for Chronic Motor or Vocal Tic Disorder (TAAICG). Other psychiatric diagnoses were not excluded. OCD and ADHD were also assessed.	ancestry-matched	A history of intellectual disability, and genetic or neurological disorders that caused tics or movement disorder phenocopies (e.g., epilepsy, known chromosomal abnormalities, etc.) (GWAS2)	NA	OCD, ADHD
Tsetsos2021	guiding	Genome	GWAS, MAGMA	Genome-wide Association Study identifies two novel loci for Gilles de la Tourette Syndrome	Fotis Tsetsos, Apostolia Topaloudi, Pritesh Jain, Zhiyu Yang, Dongmei Yu, Petros Kolovos, Zeynep Tumer, Renata Rizzo, Andreas Hartmann, Christel Depienne, Yulia Worbe, Kirsten R. Müller-Vahl, Danielle C. Cath, Dorret I. Boomsma, Tomasz Wolanczyk, Cezary Zekanowski, Csaba Barta, Zsofia Nemoda, Zsanett Tarnok, Shanmukha S. Padmanabhuni, Joseph D. Buxbaum, Dorothy Grice, Jeffrey Glennon, Hreinn Stef…	NA	medRxiv 2021.12.11.21267560	case-control, family	GWAS (TS-EUROTRAIN) and GWAS meta-analysis (TS-EUROTRAIN/GWAS2), TS	SNP array	Various Illumina platforms listed in TableS1.	Blood, cell lines	Tsetsos2021: Supplementary Table 6: Results of the gene-based analysis in FUMA. Not sure if these are resutls for meta GWAS or TSEurotrain GWAS. Total number of genes examined 5,764. NSNPs is the number of SNPs associated with the respective gene. NPARAM is the number of relevant parameters used for the model. ZSTAT is the gene-test association statistic. P is the p-value. The genetic variants we…	37 genes	6133 TS cases, 13565 controls				ancestry-matched
Yu2019_TWAS	guiding	Genome	GWAS, TWAS	Interrogating the Genetic Determinants of Tourette's Syndrome and Other Tic Disorders Through Genome-Wide Association Studies		30818990	NA	case-control and family based	TWAS	SNP array	Various Illumina platforms listed in TableS1.	Blood, cell lines	Genes below TWAS p-value threshold of 5x10-4 and PPC <0.2.	143 genes	4819 TS cases, 9488 controls	NA	European ancestry (EU)	DSM-IV-TR criteria for TS (GWAS1 and TIC), DSM-5 criteria for a lifetime history of TS (GWAS2), DSM-IV-TR criteria for Chronic Motor or Vocal Tic Disorder (TAAICG). Other psychiatric diagnoses were not excluded. OCD and ADHD were also assessed.	ancestry-matched	A history of intellectual disability, and genetic or neurological disorders that caused tics or movement disorder phenocopies (e.g., epilepsy, known chromosomal abnormalities, etc.) (GWAS2)	NA	OCD, ADHD
Abelson2005	guiding	Genome	SNV	Sequence variants in SLITRK1 are associated with Tourette's syndrome	Abelson JF, Kwan KY, O'Roak BJ, Baek DY, Stillman AA, Morgan TM, Mathews CA, Pauls DL, Rasin MR, Gunel M, Davis NR, Ercan-Sencicek AG, Guez DH, Spertus JA, Leckman JF, Dure LS 4th, Kurlan R, Singer HS, Gilbert DL, Farhi A, Louvi A, Lifton RP, Sestan N, State MW.	16224024	Science. 2005 Oct 14;310(5746):317-20. doi: 10.1126/science.1116502.	family, simplex (trios), case-control	Sequencing.Identification of a truncating frameshift mutation in SLITRK1. Family 2 showing the proband (individual 1) diagnosed with TS and ADHD. The patient’s mother (individual 2) was retrospectively diagnosed with TTM. Individuals 3 to 5 are unaffected. The affected individuals possess a predicted 100–base pair as well as a mutant 99–base pair fragment amplifying with the same polymerase chain…	PCR, Temperature Gradient Capillary Electrophoresis	Spectrumedix 96-capillary Reveal Mutation Discovery System	Blood	De novo inversion on chromosome 13 in a simplex family with a single case of TS. The gene SLITRK1 mapped to within 350 kb of the 13q31 breakpoint in this individual. Among 174 unrelated probands, we identified a frameshift mutation and two independent occurrences of the identical variant in the binding site for microRNA hsa-miR-189. These variants were absent from 3600 control chromosomes.	1 gene (Abelson2005_main)	4 families (GTS probands +/- ADHD or OCD); 174 GTS probands; 253 controls; 3600 control chromosomes		Caucasian (mostly)
Ercan-Sencicek2010	guiding	Genome	SNV	L-histidine decarboxylase and Tourette's syndrome	Ercan-Sencicek AG, Stillman AA, Ghosh AK, Bilguvar K, O'Roak BJ, Mason CE, Abbott T, Gupta A, King RA, Pauls DL, Tischfield JA, Heiman GA, Singer HS, Gilbert DL, Hoekstra PJ, Morgan TM, Loring E, Yasuno K, Fernandez T, Sanders S, Louvi A, Cho JH, Mane S, Colangelo CM, Biederer T, Lifton RP, Gunel M, State MW.	20445167	N Engl J Med. 2010 May 20;362(20):1901-8. doi: 10.1056/NEJMoa0907006. Epub 2010 May 5.	family, multiplex	Linkage analysis, Sequence analysis. Genotyping and genome-wide parametric linkage analysis, analysis of short-tandem-repeat markers that had been identified within the lod − 2 linkage interval. Parametric analyses were performed with the use of the SimWalk2 program. The coding regions of all 51 known genes within the lod − 2 linkage interval were analyzed by means of Sanger sequencing. Variants …	linkage analysis, SNP array, Sanger sequencing, PCR, TaqMan assay, CNV array, fluorescence quenching– based assay, liquid chromatography– mass spectrometry	Affymetrix GeneChip Human Mapping 100K, Illumina 1M-Duo	Blood	Nonsense truncating variant (Trp317Ter) in HDC gene segregating with TS in a Caucasian, nonconsanguineous two-generation family (Ercan-Sincicek2010_main).	1 gene (Ercan-Sincicek2010_main)	A nonconsanguineous two-generation pedigree (10 subjects: parents and 8 children)	9 years - 47 years	European ancestry (EU)	DSM-IV-TR criteria for Tourette’s syndrome (father and all eight offspring). Two children and the father also have OCD. The mother, her parents, and her extended family are reportedly free from TS, chronic tics, and OCD.	NA	NA	Yes	Father: OCD, sleep apnea, seasonal allergies, and eczema; Children: OCD, Asperger's syndrome, Reading difficulties, eczema, seasonal allergies
Sundaram2011	guiding	Genome	SNV	Exome sequencing of a pedigree with Tourette syndrome or chronic tic disorder	Sundaram SK, Huq AM, Sun Z, Yu W, Bennett L, Wilson BJ, Behen ME, Chugani HT.	21520241	Ann Neurol. 2011 May;69(5):901-4. doi: 10.1002/ana.22398.	family, multiplex	Segregtion of causal variant based on an autosomal dominant model.	WES	Illumina Genome Analyzer II, 2.1M human exome array	Blood	Novel missense mutations cosegregating perfectly with chronic tic phenotype in this large pedigree, also independently validated by Sanger sequencing of this pedigree, and not present in 100 control subjects or in dbSNP/1000 Genomes databases (Sundaram2011_main). Subsequent sequencing of these genes in 94 TS-CTD patients found a 5'UTR variant in the OFCC1 gene in 2 patients.	3 genes	10 members of a 3-generation pedigree with 7 showing TS/chronic tic phenotype (5 TS and 2 CTD)	74y - 11y	European ancestry (EU)	For diagnosis of TS: (1) motor tics fluctuating for >2 years and (2) presence of vocal tics. Subjects who had chronic tics but did not meet the criteria for TS were classified as chronic tic disorder.	NA	NA	NA	OCD, ADHD, Anxiety
Willsey2017	guiding	Genome	SNV	De Novo Coding Variants Are Strongly Associated with Tourette Disorder	Willsey AJ, Fernandez TV, Yu D, King RA, Dietrich A, Xing J, Sanders SJ, Mandell JD, Huang AY, Richer P, Smith L, Dong S, Samocha KE; Tourette International Collaborative Genetics (TIC Genetics); Tourette Syndrome Association International Consortium for Genetics (TSAICG), Neale BM, Coppola G, Mathews CA, Tischfield JA, Scharf JM, State MW, Heiman GA.	28472652	Neuron. 2017 May 3;94(3):486-499.e9. doi: 10.1016/j.neuron.2017.04.024.	family, simplex (trios)	Analysis of de novo single-nucleotide variant (SNV) and insertion-deletion variants (indel): assessment of the number of genes that contribute to TD risk via damaging de novo variants (likely gene disrupting, a.k.a. LGD (insertion of premature stop codon, frameshift, or canonical splice-site variant), and probably damaging missense, a.k.a. missense 3 or Mis3) and use of the TADA de novo only algo…	WES, Sanger sequencing	Illumina HiSeq 2000 and 2500; Nimblegen EZ Exome V2 and V3, Agilent SureSelect v1.1 exome capture platforms	Blood	Genes identified in TADA analysis as high confidence TD (hcTD) (q < 0.1) and probable TD (pTD) risk genes (q < 0.3) (Willsey2017_main). Genes identified in TADA analysis as potential TD (TD) risk genes (q < 0.5) (Willsey2017_ext) (threshold of 0.5 as used in PMID27956632). Genes were listed in Table S4.	4 genes (Willsey2017_main), 35 genes (Willsey2017_ext)	TS: 325 (311 passed QC) TS trios from the Tourette International Collaborative (TIC) Genetics cohort and a replication sample of 186 (173 passed QC) trios from the Tourette Syndrome Association International Consortium on Genetics (TSAICG) (511 total, 484 passed QC). Control: 625 (602 passed QC) control trios consisting of unaffected parents and unaffected sibling controls from the Simons Simplex…	NA	European ancestry (EU) ?	DSM-IV-TR criteria for TD or a chronic tic disorder	NA	NA	NA	OCD, ADHD
Eriguchi2017	guiding	Genome	SNV	Identification of candidate genes involved in the etiology of sporadic Tourette syndrome by exome sequencing	Eriguchi Y, Kuwabara H, Inai A, Kawakubo Y, Nishimura F, Kakiuchi C, Tochigi M, Ohashi J, Aoki N, Kato K, Ishiura H, Mitsui J, Tsuji S, Doi K, Yoshimura J, Morishita S, Shimada T, Furukawa M, Umekage T, Sasaki T, Kasai K, KanoMD PhD Y.	28608572	Am J Med Genet B Neuropsychiatr Genet. 2017 Oct;174(7):712-723. doi: 10.1002/ajmg.b.32559. Epub 2017 Jun 13.	family, simplex (trios)	Analysis of single-nucleotide variants (SNVs) and insertions/deletions (indels)	WES	Illumina Hi Seq 2000, SureSelect Human All Exon V5 +UTRs and SureSelect Human All Exon V4 +UTRs capture libraries	Blood, saliva	Among the 30 high-confidence de novo mutations validated by Sanger sequencing, 4 de novo missense mutations were identified (Eriguchi2017_ext), and among them, one (found in one proband) was predicted to hazardous by both PolyPhen-2 and SIFT/PROVEAN algorithms (Eriguchi2017_main).	1 gene (Eriguchi2017_main), 4 genes (Eriguchi2017_ext)	10 sporadic TS pedigrees: 9 trio families and one quartet family with monozygotic twins concordant for TS	10y-62y	Japanese	DSM-IV-TR criteria for TS	NA	Inherited TS cases and probands with environmental factors were excluded. Specifically, to rule out inherited TS cases, psychiatric and neurological information about the first, second, and third degree relatives was collected. The M.I.N.I (Mini-International Neuropsychiatric Interview) (Sheehan et al., 1998) was performed and families were excluded if any of the parents met any diagnostic criter…	NA	OCB
Sun2018	guiding	Genome	SNV	The PNKD gene is associated with Tourette Disorder or Tic disorder in a multiplex family	Sun N, Nasello C, Deng L, Wang N, Zhang Y, Xu Z, Song Z, Kwan K, King RA, Pang ZP, Xing J, Heiman GA, Tischfield JA.	28894297	Mol Psychiatry. 2018 Jun;23(6):1487-1495. doi: 10.1038/mp.2017.179. Epub 2017 Sep 12.	family, multiplex	The pedigree Variant Annotation, Analysis and Search Tool (pVAAST) program prioritized candidate genes under both dominant and recessive modes of inheritance. Single nucleotide variants and short insertion/deletions overlapping coding and splice sites were included in the analysis, which was performed allowing up to 1% prevalence of a variant in the background sample. The background sample consis…	WES	Illumina HiSeq 2000, SureSelect Human All Exon V5+UTR	Blood, saliva	Nonsense mutation in PNKD found to cosegregate with TS in a large pedigree (and functional evidence as well) (Sun2018_main). Unique genes combined from lists of 145 genes and 167 genes scored under dominant and recessive modes of inheritance, respectively, with P-value <0.05, as listed in Supplementary Table S4 (Sun2018_ext).	1 gene (Sun2018_main), 221 genes (Sun2018_ext)	6 out of 9 members of a 3-generation pedigree with 8 showing TS/(chronic) tic phenotype	NA		Four siblings (including the proband) met DSM-IV-TR 3 criteria for TD and one sibling met criteria for a chronic tic disorder not specified in the DSM (chronic tic disorder-combined subtype defined as a history of a single motor (rather than multiple motor) and at least one vocal tic, with onset prior to age 18 and persistence for at least a year). The father was also diagnosed with chronic tic d…	NA	NA	NA	OCD, OCB, ADHD, ASD
Wang2018	guiding	Genome	SNV	De Novo Sequence and Copy Number Variants Are Strongly Associated with Tourette Disorder and Implicate Cell Polarity in Pathogenesis	Wang S, Mandell JD, Kumar Y, Sun N, Morris MT, Arbelaez J, Nasello C, Dong S, Duhn C, Zhao X, Yang Z, Padmanabhuni SS, Yu D, King RA, Dietrich A, Khalifa N, Dahl N, Huang AY, Neale BM, Coppola G, Mathews CA, Scharf JM; Tourette International Collaborative Genetics Study (TIC Genetics); Tourette Syndrome Genetics Southern and Eastern Europe Initiative (TSGENESEE); Tourette Association of America I…	30257206	Cell Rep. 2018 Sep 25;24(13):3441-3454.e12. doi: 10.1016/j.celrep.2018.08.082.	family, simplex (trios)	We defined likely gene disrupting (LGD) variants as insertion of a premature stop codon, disruption of a canonical splice site, or a frameshift insertion or deletion, and probably damaging missense 3 (Mis 3) variants include missense variants with a PolyPhen2 (HDIV) score R0.957. We refer to the set of LGD and Mis3 variants as ‘‘damaging’’. We leveraged de novo damaging variants and the Transmiss…	WES, Sanger sequencing	Illumina HiSeq 2000, 2500, and 4000; Nimblegen EZ Exome V2 and V3, Agilent SureSelect v1.1, Agilent SureSelect v1.1, IDT xGen Exome Research Panel exome capture platforms	Blood, lymphoblastoid cell lines, saliva	Genes identified in TADA analysis as high confidence TD (hcTD) (q < 0.1) and probable TD (pTD) risk genes (q < 0.3) (Wang2018_main). Genes identified in TADA analysis as potential TD (TD) risk genes (q < 0.5) (Wang2018_ext) (threshold of 0.5 as used in PMID27956632). Genes were listed in Table S7.	9 genes (Wang2018_main), 48 genes (Wang2018_ext)	TS: 802 TS trios (777 after QC) which comprise 511 TS trios from Phase 1 study (Willsey2017) and 291 additional TS trios collected by TICGen, UTC, and TSGENESEE. Control: 582 new Phase 2 control trios from the Simons Simplex Collection (SSC) (1,184 total control trios (1,153 after QC) across phase 1 and 2). The combined TS dataset consists of apparently simplex trios (the proband is the only indi…	NA		DSM-IV-TR criteria for TD or a chronic tic disorder	NA	NA	NA	OCD, ADHD
Carias2019	guiding	Genome	SNV	Clinical and genetic analysis of children with a dual diagnosis of Tourette syndrome and autism spectrum disorder	Carias KV, Wevrick R.	30771620	J Psychiatr Res. 2019 Apr;111:145-153. doi: 10.1016/j.jpsychires.2019.01.023. Epub 2019 Feb 7.	family, simplex (trios)	Genetic mutations in SSC probands were derived from data in “GPF: Genotype and Phenotype in Families” (www.iossifovlab.com/gpf/).	WES	www.iossifovlab.com/gpf/	Blood	Carias2019_ext: Unique 63 genes carrying de novo coding variants (1) that were deemed intolerant to either LGD or missense mutations according to ExAC probability score (pLI) (34 of the 94 genes) and (2) that were likely deleterious to the encoded protein according to the PROVEAN (Protein Variation Effect Analyzer) prediction algorithm (49 of the 94 genes).	63 genes (Carias2019_ext)	119 children with ASD and TS compared to 2603 children with ASD without TS, all from the Simons Simplex Collection (SSC). SSC contains data on ∼2700 children with ASD, their parents and at least one unaffected sibling.	NA		ASD probands with a physician-confirmed diagnosis of Tourette syndrome. TS diagnosis was made by a physician but there is no information about criteria used for the diagnosis. Information about the type of tic present (motor or vocal, or combination of the both), severity, and duration is not available.	ASD probands reported to have neither TS nor tics.	Probands with “suspected” tics (N=18) were not included in either group. Parents and siblings have been tested and do not have neurological conditions.The SSC is thus depleted for heritable forms of TS.	NA	ASD
Vadgama2019	guiding	Genome	SNV	De novo single-nucleotide and copy number variation in discordant monozygotic twins reveals disease-related genes	Vadgama N, Pittman A, Simpson M, Nirmalananthan N, Murray R, Yoshikawa T, De Rijk P, Rees E, Kirov G, Hughes D, Fitzgerald T, Kristiansen M, Pearce K, Cerveira E, Zhu Q, Zhang C, Lee C, Hardy J, Nasir J.	30886340	Eur J Hum Genet. 2019 Jul;27(7):1121-1133. doi: 10.1038/s41431-019-0376-7. Epub 2019 Mar 18.	family, simplex (trios)	De novo variant detection in parent–offspring trio analysis: after filtering for rare or novel variants that were predicted to be damaging by at least one of the pathogenicity prediction tools led to the identification of 41 variants inherited from the father. One of them has been previously implicated in TS (stop loss variant in AADAC) and was validated with Sanger sequencing in this family. No …	WES	Illumina HiSeq 3000, SureSelect V6	Blood	Shared novel stop loss variant in AADAC (validated with Sanger sequencing) that was inherited from the father affected with TS.	1 gene (Vadgama2019_main)	Parent–offspring trio, pair of MZ twins discordant for TS	15 (MZ twins), 44 (parents)	Causasian/Mixed (American Indian, Causasian)	TS in Father: diagnosis of TS at seven years of age, motor and vocal tics from the age of six. TS in affected twin similarly experienced tics from the age of seven, and was given a diagnosis of TS at eight. For an individual to be diagnosed with TS, they must display multiple motor tics and at least one vocal tic, both of which must be ongoing for at least one year. Individuals who have either mo…	NA	NA	NA	OCD, ADHD (Father)
Liu2020	guiding	Genome	SNV	Mutations in ASH1L confer susceptibility to Tourette syndrome	Liu S, Tian M, He F, Li J, Xie H, Liu W, Zhang Y, Zhang R, Yi M, Che F, Ma X, Zheng Y, Deng H, Wang G, Chen L, Sun X, Xu Y, Wang J, Zang Y, Han M, Wang X, Guan H, Ge Y, Wu C, Wang H, Liang H, Li H, Ran N, Yang Z, Huang H, Wei Y, Zheng X, Sun X, Feng X, Zheng L, Zhu T, Luo W, Chen Q, Yan Y, Huang Z, Jing Z, Guo Y, Zhang X, Schaaf CP, Xing J, Wang C, Yu F, Guan JS.	31673123	Mol Psychiatry. 2020 Feb;25(2):476-490. doi: 10.1038/s41380-019-0560-8. Epub 2019 Oct 31.	family, simplex (trios)	The SNVs and Indels were called using the goSNAP pipeline. Filtered for the rare damaging variants using the following criteria: (1) Rare variants with allele frequency ≤0.01 in the 1000 Genomes Project phase3 East Asians and the Exome Aggregation Consortium [44] (ExAC) East Asians; (2) LoF variants: variants annotated as stop gain, stop loss, splicing acceptor, splicing donor, frameshift inserti…	WES	Illumina Hiseq 2000,SureSelect Human All Exon 50MB, Illumina NovaSeq platform	Blood	Liu2020_main: genes with de novo damaging mutations identified and validated by Sanger Sequencing in 100 trios, as listed in Supplementary Table 7. Liu2020_ext: genes with P-value ≤ 0.05 in the rare-variant transmission disequilibrium (RV-TDT) test, as listed in Supplementary Table 8 (none of these detected associations met exome-wide significance of 3.64 × 10–5).	37 genes (Liu2020_main), 76 genes (Liu2020_ext)	100 TS-affected trios (97 after QC); TS cases comprised 22 females and 78 males. Replication for sequencing of all of the ASH1L exons and KIF26B exons: 524 TS cases (117 female and 407 male)	5-18 years (patients’ mean age: 10.45 ± 3.02)	Chinese (EAS)	DSM-IV criteria for TS, diagnosed independently by two experienced psychiatrists	NA	Major psychiatric or neurological conditions, including psychosis, ASD, ID, and DD.	Yes	ADHD (62 cases), OCD (33 cases)
Dapienne2019	guiding	Genome	SNV	Association of Rare Genetic Variants in Opioid Receptors with Tourette Syndrome	Depienne C, Ciura S, Trouillard O, Bouteiller D, Leitão E, Nava C, Keren B, Marie Y, Guegan J, Forlani S, Brice A, Anheim M, Agid Y, Krack P, Damier P, Viallet F, Houeto JL, Durif F, Vidailhet M, Worbe Y, Roze E, Kabashi E, Hartmann A.	31824749	Tremor Other Hyperkinet Mov (N Y). 2019 Nov 22;9. doi: 10.7916/tohm.v0.693. eCollection 2019.	case–control	In WES, we identified rare possibly deletorious variants (altering coding sequences or splice sites) in 3,041 genes (424 genes with variants present in at least 2 TS individuals). A set of 63 variants in 54 selected candidate genes (preferentially expressed in basal ganglia) was validated by Sanger sequencing in the affected subjects, confirming the presence of all variants but one. Also, six gen…	WES, Sanger sequencing, pyrosequencing	Illumina HiSeq 2000, SureSelect Human All Exon 50 Mb, Roche 454 GS Junior	Blood	There was a significant excess of rare variants in OPRK1 and OPRM1 in TS patients (Dapienne2019_main), and a downregulation of the Oprk1 orthologue in zebrafish induced a hyperkinetic phenotype in early development.	2 genes (Dapienne2019_main)	12 TS patients with rare variants in SLITRK1-6 and HDC were selected from the 120 French individuals with TS (92 males and 28 females) from the “Réseau National Gilles de la Tourette” (INSERM RBM 04-18; 2005–2007) and the “Centre de Référence National Maladies Rares Syndrome Gilles de la Tourette” (Pitié-Salpêtrière Hospital, Paris, France) cohort for exome sequencing. A total of 788 French healt…	adolescent (minimum age: 15 years) and adult patients with GTS	European ancestry (EU)	DSM-IV diagnosis of GTS. One patient out of 12 had pervasive developmental disorder not otherwise specified (PDD-NOS) in addition to TS.	NA	The exclusion criteria were evaluated by administering the French version of Mini International Neuropsychiatric Interview (M.I.N.I; version 5.0.0) to all patients by trained psychologists or psychiatrists before entering the study. Patients suffering from concomitant psychosis, current major depressive episode, autistic spectrum disorders, substance abuse (except nicotine) or mental deficiency w…	Yes	Repetitive behaviours: (i) group of compulsions and obsessions (‘OCD-like’ group); (ii) group of ‘tic-like’ RB and thoughts). The RB or thoughts were classified as undetermined if both criteria for tics and compulsions or obsessions were identified for the same RB, or if the RB did not correspond to all criteria of compulsions or tics; ADHD
Zhao2020	guiding	Genome	SNV	A Whole-Exome Sequencing Study of Tourette Disorder in a Chinese Population	Zhao X, Wang S, Hao J, Zhu P, Zhang X, Wu M.	31855460	DNA Cell Biol. 2020 Jan;39(1):63-68. doi: 10.1089/dna.2019.4746. Epub 2019 Dec 19.	family, simplex (trios)	Fisher’s exact test was used to find de novo likely gene-disrupting (LGD) variants that were consistently associated with TD risk. We analyzed intolerant genes in de novo LGD and missense variants. Student’s t-test was used to analyze probands having de novo damaging variants for subjects who had or did not have high Yale Global Tic Severity Scale (YGTSS) scores. We also found a compound heterozy…	WES	Illumina Hiseq X-10, SureSelect v5, Nimblegen EZ v2	Blood	Genes containing: (1) 8 de novo damaging variants (defined as LGD (e.g., Frameshift substitution) and Mis3 variants (Nonsynonymous SNV)), including 2 de novo LGD variants and 6 de novo Mis3 confirmed with Sanger sequencing, listed Table 2 and Supplementary Table S1; (2) 5 de novo likely gene disrupting variants and missense in Intolerant Genes, confirmed with Sanger sequencing, listed in Table 3 …	11 genes (Zhao2020_main)	15 child-parent trios (45 samples), 1153 controls from Simons Simplex Collection (SSC)	TS probands: 3-18 years of age; Paternal age (mean-SD) TS: 32.47-8.04, Controls: 32.6-5.54, Maternal age (mean-SD) TS: 27.33-4.64, Controls: 30.55-4.95	Chinese	DSM-V criteria for TD	We used the unaffected parents and the unaffected sibling from SSC, which is treated as a trio, as our normal control.	NA	NA	OCD, ADHD
Yuan2020	guiding	Genome	SNV	A Rare Novel CLCN2 Variation and Risk of Gilles de la Tourette Syndrome: Whole-Exome Sequencing in a Multiplex Family and a Follow-Up Study in a Chinese Population	Yuan A, Wang Z, Xu W, Ding Q, Zhao Y, Han J, Sun J.	33343406	Front Psychiatry. 2020 Dec 3;11:543911. doi: 10.3389/fpsyt.2020.543911. eCollection 2020.	family, multiplex	To prioritize variations, we applied filtering steps to variations in WES: (1) we filtered out variations with <20X coverage; (2) we filtered out variations whose population frequency was <0.1% in the gnomAD_EAS; (3) the likely pathogenic (LP) and pathogenic (P) variations were selected according to the scoring criteria of the American College of Medical Genetics and Genomics (ACMG). To assess co…	WES	Illumina HiSeq 2000, SureSelectXT Human All Exon V6	Blood	From the five rare variations that were confirmed by Sanger sequencing and predicted to be “probably damaging” by PolyPhen-2, only one (CLCN2 G161S ) was identified in three affected individuals but not in one unaffected individual - it co-segregated with the phenotypes of TS and was inherited from the proband’s father (Yuan2020_main). In contrast, the other four variations were present in both a…	1 gene (Yuan2020_main)	Multiplex family with 3 TS cases (proband, his MZ twin brother, and his father) and one tic disorder (the proband’s grandmother), the proband’s mother, aunt, and two uncles were confirmed as unaffected). Validation of CLCN2 variation in 207 sporadic patients with tic disorder and 489 healthy controls.		Chinese	DSM-IV-TR criteria for tic disorder or TS, diagnosis made by an experienced deputy chief psychiatrist.	NA	NA	NA	OCD, ADHD
Cao2021	guiding	Genome	SNV	Whole-exome sequencing identifies genes associated with Tourette's disorder in multiplex families	Cao X, Zhang Y, Abdulkadir M, Deng L, Fernandez TV, Garcia-Delgar B, Hagstrøm J, Hoekstra PJ, King RA, Koesterich J, Kuperman S, Morer A, Nasello C, Plessen KJ, Thackray JK, Zhou L; Tourette International Collaborative Genetics Study (TIC Genetics), Dietrich A, Tischfield JA, Heiman GA, Xing J.	33837273	Mol Psychiatry. 2021 Apr 9:10.1038/s41380-021-01094-1. doi: 10.1038/s41380-021-01094-1. Online ahead of print.	Family, multiplex	The pedigree Variant Annotation, Analysis and Search Tool (pVAAST) was used to identify candidate genes in each pedigree. pVAAST is a likelihood-based tool that prioritize candidate genes using several types of variant information in each gene, including the segregation pattern, the predicted functional impact, and the allele frequency (AF) in general populations. pVAAST was run under dominant mo…	WES	Illumina HiSeq, SureSelect Human All Exon V4, Human All Exon V4 + UTR, NimbleGen SeqCap EZ Exome V2	Blood	The number of candidate genes reported among the 13 families varied from 1 to 218, with a total of 1018 genes. After filtering, the number of candidate genes ranged from 1 to 125 among the 13 families, with a total of 543 unique genes, refereed to as “TD_multiplex” genes, listed in Table S3 (Cao2021_ext). Among the 543 unique genes, 25 were identified in more than one family, most of which were i…	71 genes (Cao2021_main), 543 genes (Cao2021_ext)	13 TIC Genetics multiplex families (110 individuals for WES, including 72 individuals with TD and 38 non-TD family members)		European ancestry (white)	DSM-IV-TR or DSM-5 criteria for TD/tic disorder. In this study, a TD-affected individual is defined as an individual who was diagnosed with TD or other tic disorders (i.e., chronic motor or vocal tic disorder, a combined subtype, transient tic disorder or tic disorder-not otherwise specified).	NA	NA	NA	OCD, ADHD
Halvorsen2021	guiding	Genome	SNV	Elevated common variant genetic risk for tourette syndrome in a densely-affected pedigree	Halvorsen M, Szatkiewicz J, Mudgal P, Yu D; Psychiatric Genomics Consortium TS/OCD Working Group, Nordsletten AE, Mataix-Cols D, Mathews CA, Scharf JM, Mattheisen M, Robertson MM, McQuillin A, Crowley JJ.	34526668	Mol Psychiatry. 2021 Sep 15. doi: 10.1038/s41380-021-01277-w. Online ahead of print.	Family, multiplex	As quality control, we tested for concordance between array-based variant genotypes and sequence-based genotypes, which would be consistent with sample concordance. Disagreement between the genotypes would suggest that sample switching had occurred in WGS data. We screened the 8 WGS samples for shared previously reported pathogenic repeat expansions using TREDPARSE v0.7.8. A total of 30 trinucleo…	WGS, SNP array	Illumina HiSeq X	Blood	We identified a total of 27 variants that could be classified as damaging coding variants (Table S3) (mapped to 26 genes, Halvorsen2021_ext). Of these, 23 could be classified as damaging based on having missense annotation with an MPC score ≥2, while four could be classified as damaging based on having loss-of-function annotation and falling within a gene that has a pLI score in the nonpsychiatri…	2 genes (Halvorsen2021_main), 27 genes (Halvorsen2021_ext)	8 cases; A densely-affected British pedigree that spans six generations and includes 122 members, 85 of whom were individually interviewed, and 53 of whom were diagnosed as “cases” (consisting of 28 with definite or probable TS, 20 with chronic multiple tics [CMT], and 5 with obsessive-compulsive behaviors (OCB)). A total of 66 DNA samples were available (25 TS, 15 CMT, 4 OCB cases, and 22 unaffe…		European ancestry (EU)	Individuals were assigned to diagnostic categories as follows: (a) definite GTS: satisfying DSM-III criteria on history and examination; (b) probable GTS: symptoms observed but no history obtained, or history obtained but no symptoms observed; (c) definite CMT: DSM-III diagnosis on history and examination; (d) probable CMT: as for probable GTS but without vocalisations; (e) Obsessive-compulsive b…	NA	NA	Yes	OCB
Zilhão2015	corroborating	Epigenome	EWAS	Epigenome-Wide Association Study of Tic Disorders	Zilhão NR, Padmanabhuni SS, Pagliaroli L, Barta C; BIOS Consortium, Smit DJ, Cath D, Nivard MG, Baselmans BM, van Dongen J, Paschou P, Boomsma DI.	26499864	Twin Res Hum Genet. 2015 Dec;18(6):699-709. doi: 10.1017/thg.2015.72. Epub 2015 Oct 26.	family (twins, siblings, parents), case-control	Only autosomal methylation sites were analyzed in the EWAS. EWAS was performed using linear regression under an additive model correcting for principal components (PCs) and covariates (monocyte count, eosinophils count, neutrophils count, array row number, smoking status, age, and sex). Generalized estimation equation (GEE) models were used to test whether tics were associated with DNA methylatio…	microarray	Illumina Infinium HumanMethylation450 BeadChip Kit (HM450k array)	Blood	Unique genes annotated to the top CpG sites in the EWAS with p-value <0.0001 (N = 57); only those with the nearest genes dectected were reported, listed in Table 3 (Zilhao2015_main)	53 genes (Zilhao2015_main)	A total of 1,678 individuals (twins, siblings, and parents) from 1,057 families including 188 cases and 1,490 controls, population-based sample from the NTR.	mean age: 41.5	European ancestry (EU)	An ‘inclusive’ tic phenotype definition. The subjects are participants in surveys at the Netherlands Twin Register (NTR) and the NTR biobank project. Tics were measured using an abbreviated 12-item self report version of the YGTSS, the latter being a well-validated interview with a high internal consistency (Cronbach’s alpha > 0.90; Leckman et al., 1989). The YGTSS-abbreviated (YGTSS-ABBR) contai…	Na	NA	NA	NA
Hildonen2021	corroborating	Epigenome	EWAS	EWAS of Monozygotic Twins Implicate a Role of mTOR Pathway in Pathogenesis of Tic Spectrum Disorder	Hildonen M, Levy AM, Hansen CS, Bybjerg-Grauholm J, Skytthe A, Debes NM, Tan Q, Tümer Z.	34680906	Genes (Basel). 2021 Sep 26;12(10):1510. doi: 10.3390/genes12101510.	family (MZ twins)	A linear mixed model using the R package lmerTest, regressing methylation levels on clinical phenotype was employed to identify differentially methylated positions (DMPs) associated with TSD. The model was corrected for age, with twin pairing as a random effect. As we did not observe any difference in cell-type composition between TSD individuals and controls, and as our sample size was relativel…	microarray	Illumina Infinium MethylationEPIC arrays	Blood	Hildonen2021_main: Genes reported in Table1 - the closest genes to the identified differentially methylated positions (DMPs) with a p-value < 1 × 10−5 (FRD 0.48-0.63) - defined as suggestive significance, and genes reported in Table 3 - the closest genes to the identified differentially methylated regions (DMRs) with a Šidák adjusted p-value < 0.1. Hildonen2021_ext - includes also genes reported …	20 genes (Hildonen2021_main), 28 genes (Hildonen2021_ext)	16 clinically well-defined monozygotic twins, concordant (6 pairs), discordant (8 pairs) or asymptomatic (2 pairs) for TS.		European ancestry (EU)	DSM-V criteria for GTS or CTD (collectively referred to as TSD throughout the manuscript)	NA	NA	NA	NA
Lit2007	corroborating	Transcriptome	mRNA	A subgroup of Tourette's patients overexpress specific natural killer cell genes in blood: a preliminary report	Lit L, Gilbert DL, Walker W, Sharp FR.	17503477	Am J Med Genet B Neuropsychiatr Genet. 2007 Oct 5;144B(7):958-63. doi: 10.1002/ajmg.b.30550.	case–control	The TS and CNTRL expression values for all genes were compared to identify genes that were upregulated or downregulated by at least 1.5-fold and were significantly different (parametric t-tests, P<=0.05, false discovery rate (FDR)=0.05 [Benjamini and Hochberg 1995]) between the two groups. Fourteen probesets were identified that met these criteria, representing 13 genes (i.e., two probesets both …	microarray	Affymetrix U95 array, RT-PCR	Blood	Fourteen probesets were identified that met these criteria, representing 13 genes (i.e., two probesets both represented one gene) (Table 1).There are in fact 23 unique genes listed in Table1. All Tourette’s Syndrome Patients (n=16) Versus All Age-Matched Controls (n=16), Fold Change >=|1.5|, Parametric t Test, P<0.05, False Discovery Rate=0.05 (Lit2007_main).	24 genes (Lit2007)	TS (n = 16: 12M, 4F) age- and gender-matched control (CNTRL) subjects (n = 16: 12M, 4F)	TS: mean ± SD age, 17.4 ± 13.9 year; Controls: mean ± SD age, 18.2 ± 12.8 years	NA	DSM IV criteria for diagnoses of TS, as well as of ADHD (8/16) and OCD (7/16). TS subjects had least one affected first-degree family member with TS.	Controls were selected based on age- and gender-matching and included patients with adult epilepsy (n 2), headache (n 4), neurofibromatosis (n 2), Parkinson’s Disease (PD) (n 1), pediatric epilepsy (n 6), and a healthy individual (n 1).	NA	Yes	ADHD, OCD
Lit2009	corroborating	Transcriptome	mRNA	Age-related gene expression in Tourette syndrome	Lit L, Enstrom A, Sharp FR, Gilbert DL.	18485367	J Psychiatr Res. 2009 Jan;43(3):319-30. doi: 10.1016/j.jpsychires.2008.03.012. Epub 2008 May 15.	case-control	Two groups of statistical analyses were performed on the remaining 39,634 probes after filtering: (1) Correlation analyses: gene expression correlated with age for TS, and gene expression correlated with age for normal controls (NC); and (2) t-test analyses: mean difference in gene expression for TS vs. NC, stratified by age group (5–9-year-old, 10–12-year-old, 13–16-year-old). For all analyses, …	microarray	Affymetrix Human U133 Plus 2.0	Blood	Supplemental Table S6. 111 Probes Inversely Correlated with Age for TS and NC (Lit2009_corr), Supplemental Table S3, T-test Analysis Tourette (TS) vs Normal Controls (NC), Ttest Analysis 5-9 Age Group, p <= .05, 2456 probes (Lit2009_age5-9); Supplemental Table S4. T-test Analysis Tourette (TS) vs Normal Controls (NC), Ttest Analysis 10-12 Age Group, p <= .05, 1715 probes (Lit2009_age10-12); Suppl…	IPA annotated genes based on Affymetrix ID	30 TS (23M, 7F), 28 controls (21M, 7F)	Control: Males: mean age 11.4 years and females: mean 11.4 years; TS: males: mean age 11.4 years and females: mean 11.7 years.		Diagnoses of TS, as well as of ADHD (15/30) and OCD (16/30) were based on DSM IV criteria	The healthy controls were recruited from schools in the Cincinnati area that were demographically similar to those from which the children with TS originated. For each TS case, a NC matched for age within 2 years, gender, and race was recruited.	Children with any neurological, psychiatric, or developmental diagnosis made by a physician were excluded, based on parent interview.	Yes	ADHD, OCD
Tian2011	corroborating	Transcriptome	mRNA	Exon expression and alternatively spliced genes in Tourette Syndrome	Tian Y, Liao IH, Zhan X, Gunther JR, Ander BP, Liu D, Lit L, Jickling GC, Corbett BA, Bos-Veneman NG, Hoekstra PJ, Sharp FR.	21184586	Am J Med Genet B Neuropsychiatr Genet. 2011 Jan;156B(1):72-8. doi: 10.1002/ajmg.b.31140. Epub 2010 Nov 17.	case–control	Differentially expression of exons and transcripts between TS and controls with an analysis of covariance (ANCOVA), controlling for the effects of age, gender, and batch (Partek Genomics Suite 6.4). Alternative splicing in TS compared to controls was assessed as the interaction of diagnosis and exon with alternative splicing analysis of variance (ANOVA).	microarray	Affymetrix Human U133 plus 2.0, Affymetrix Human Exon 1.0 ST	Blood	An uncorrected P < 0.05 was considered significant for alternative splicing. Additional filtering criteria: (1) probe sets with a log2 value <3.0 in all samples were excluded except for those cases where there was a significant difference in expression of a single exon between the groups (P < 0.05); (2) genes whose transcript expression was significantly different between TS and controls were fil…	A total of 1,403 exon probesets were significantly different at P<0.01 (fold change >|1.2|; Supplementary Table III). There were 376 exons whose expression was significantly different with a P<0.005 and fold change >|1.2|, and without any significant differences for the other factors (Page>0.05, Pgender>0.05, and Pbatch>0.05; Supplementary Table IV). The unsupervised hierarchical cluster analysis…	26 cases (20M, 6F), 23 controls (11M, 12F); There was no significant difference for age (P=0.39) and race (P=0.07) between the two groups. Gender was significantly different between the groups (P=0.04).	TS: 7 to 15 (mean 10.2 ±2.2); Control: 7 to 13 (mean 9.7 ±2.1)	White (n=39), Hispanic (n=2), Black (n=1) ,Other (n=7)	DSM-IV-TR criteria for TS	Age-matched typically developing children that were screened for neurodevelopmental disorders and serious physical illness.	A history of serious physical illness (e.g., endocrine, cardiovascular, or neurological disorders).	No	possibly OCD, ADHD
Tian2011_BR	corroborating	Transcriptome	mRNA	GABA- and acetylcholine-related gene expression in blood correlate with tic severity and microarray evidence for alternative splicing in Tourette syndrome: a pilot study	Tian Y, Gunther JR, Liao IH, Liu D, Ander BP, Stamova BS, Lit L, Jickling GC, Xu H, Zhan X, Sharp FR.	21241679	Brain Res. 2011 Mar 24;1381:228-36. doi: 10.1016/j.brainres.2011.01.026. Epub 2011 Jan 15.	case-control	We performed a whole genomic analysis to identify the differentially expressed genes in TS compared to HC, and to identify the genes that correlated with tics in the TS subjects. To examine the expression of fulllength transcripts that correlated with tic severity, an analysis of covariance (ANCOVA) was performed, controlling for the effects of age, gender and batch. An uncorrected p<0.05 was con…	microarray	Affymetrix Human Exon 1.0 ST	Blood	There were only 51 full-length transcripts that were differentially expressed in TS compared to HC as assessed using exon arrays (p<0.05, fold change >|1.2|) (Supplementary Table 1). 3627genes (Supplementary Table2) were significantly correlated with tic severity (p<0.05) in the peripheral blood of the 26 un-medicated TS subjects (ANCOVA).	There were only 51 full-length transcripts that were differentially expressed in TS compared to HC as assessed using exon arrays (p<0.05, fold change >|1.2|) (Supplementary Table 1). 3627genes (Supplementary Table2) were significantly correlated with tic severity (p<0.05) in the peripheral blood of the 26 un-medicated TS subjects (ANCOVA).	26 cases (20M, 6F), 23 controls (11M, 12F); There was no significant difference for age (P=0.39) and race (P=0.07) between the two groups. Gender was significantly different between the groups (P=0.04).	TS: 7 to 15 (mean 10.2 ±2.2); Control: 7 to 13 (mean 9.7 ±2.1)	White (n=39), Hispanic (n=2), Black (n=1) ,Other (n=7)	DSM-IV-TR criteria for TS	Age-matched typically developing children that were screened for neurodevelopmental disorders and serious physical illness.	A history of serious physical illness (e.g., endocrine, cardiovascular, or neurological disorders).	No	possibly OCD, ADHD
Lennington2016	corroborating	Transcriptome	mRNA	Transcriptome Analysis of the Human Striatum in Tourette Syndrome	Lennington JB, Coppola G, Kataoka-Sasaki Y, Fernandez TV, Palejev D, Li Y, Huttner A, Pletikos M, Sestan N, Leckman JF, Vaccarino FM.	25199956	Biol Psychiatry. 2016 Mar 1;79(5):372-382. doi: 10.1016/j.biopsych.2014.07.018. Epub 2014 Jul 24.	case–control	Differental gene expression (DGE) in edgeR; WGCNA; GSEA; IPA; ConsensusPathDB. To test whether the WGCNA modules were differentially expressed between TS and NC, we performed GSEA, where the modules were used as test gene sets and gene expression levels were used as input. Ten modules were significantly enriched in upregulated or downregulated genes (Table 2; Table S9). Their member genes, togeth…	RNA-seq	Illumina Hi Seq 2000	Brain (striatum: caudate, putamen)	DGE analysis: Differentially expressed genes in comparison TS vs. control with FDR < 0.05 listed in Table S3a-c. WGCNA: Ten modules were significantly enriched in upregulated or downregulated genes (Table 2; Table S9). Their member genes, together with their fold change in expression in TS versus control subjects from DGE analysis, are listed in Table S10.	DEGs (Table S3a-c)	9 cases (5M, 4F), 9 controls (5M, 4F) 62.77, median of 52, and range of 29–84 years. The normal control (NC) cohort (n = 9) consisted of four (44.44%) females and	TS: mean 62.77, range of 29–84 years; Control: mean 58, range of 4–60 years		cases with refractory symptoms in adulthood	normal control	Cases with known or suspected neurological diseases and prolonged hypoxia	Yes	Yes
Murgia2021	additional	Metabolome	metabolite	Metabolomic Characterization of Pediatric Acute-Onset Neuropsychiatric Syndrome (PANS)	Murgia F, Gagliano A, Tanca MG, Or-Geva N, Hendren A, Carucci S, Pintor M, Cera F, Cossu F, Sotgiu S, Atzori L, Zuddas A.	34121984	Front Neurosci. 2021 May 28;15:645267. doi: 10.3389/fnins.2021.645267. eCollection 2021.	case–control	Comparison of the metabolic profile of the two classes of patients, considering both a model including all of the samples together and models considering males and females separately, to underline possible differences based on gender.PCA and Orthogonal Partial Least Square Discriminant Analysis (OPLS-DA) was applied. OPLS-DA maximizes the discrimination between samples assigned to different class…	Proton Nuclear Magnetic Resonance (1H-NMR)	Varian UNITY INOVA 500 spectrometer (Agilent Technologies, Inc., Santa Clara, CA, United States)	Serum	P-value of < 0.05 corrected for multiple comparisons (Holm-Bonferroni test) for main results (2-Hydroxybutyrate and glycerol were found to be increased in PANS patients, while asparagine, glycine, glutamine, histidine, tryptophan, tyrosine were found to be decreased). For extended - uncorrected p-value <0.05 (12 metabolites).	8 metabolites: 2-OH-Butyrate, Asparagine, Glycerol, Glycine, Glutamine, Histidine, Tryptophan, Tyrosine (Murgia2021_main); 4metabolites Acetone, Alanine, Dimethylamine, Isoleucine (Murgia2021_ext). Only glycine (p = 0.03), tryptophan (p = 0.02) and tyrosine (p = 0.01) were found to be significantly correlated with the severity of the syndrome. Pathway analysis on the 8 metabolites indicated that …	34 cases (71% male), 25 controls (64%males)	9.5 - 12 y	European ancestry (EU)	PANS working criteria (NIMH, 2010)	Children with no autoimmune pathologies, neurodevelopmental and psychiatric disorders and with adequate academic achievement and functional performance.	(I) occurrence of immunological diseases or cancer; (II) presence of other medical or neurological/psychiatric diseases; (III) active treatment with psychoactive substances, non-steroidal anti-inflammatory drugs or corticosteroid agents; (IV) patients’ unwillingness to participate in the study	NA	NA
Xi2020	additional	Metabolome	metabolite	Potential Plasma Metabolic Biomarkers of Tourette Syndrome Discovery Based on Integrated Non-Targeted and Targeted Metabolomics Screening	Xi, Leying, Zhou, Fuqiong, Sha, Huan, Zhu, Weina, Hu, Xueling, Ruan, Jie, Huang, Yaruo, Zhang, Yajie,Long, Hongyan	NA	Leying Xi, Fuqiong Zhou, Huan Sha et al. Potential Plasma Metabolic Biomarkers of Tourette Syndrome Discovery Based on Integrated Non-Targeted and Targeted Metabolomics Screening, 16 December 2020, PREPRINT (Version 1) available at Research Square [https://doi.org/10.21203/rs.3.rs-126790/v1]	case–control	Untargeted ultra-high-performance liquid chromatography -quadrupole time-off light mass spectrometry (UHPLC-Q-TOF/MS), validation experiments based on targeted ultrahigh-performance liquid Chromatography-Triple Quadrupole-MS (UHPLC/MS/MS). After being normalized and integrated, MetaboAnalystR (3.0.3)[16] was employed for the statistical analysis (including PLS-DA analysis, hierarchical cluster an…	UHPLC-Q-TOF/MS, UHPLC/MS/MS	Agilent 1290 Infinity LC system, Agilent 6460 triple quadrupole mass spectrometer	Plasma	1775 differentially metabolites between the TS patients and healthy controls were identified by partial least squares discriminant analysis (PLS-DA), fold change analysis, T-tests, and hierarchical clustering analysis (Adjusted p-value < 0.05 and |logFC| >1) ( 1324 positive-mode and 451 negative-mode different metabolite components were identified in the two groups). Two enrichment algorithms con…	2 metabolites: D-Pipecolinic acid, L-Arginine (Xi2020_main)' 6 metabolites: L-Carnitine, L-Glutamate, D-Ornithine, D-Proline, D-Homoproline, L-Ornithine (Xi2020_ext)	The total 49 participants have been recruited: for the untargeted UHPLC-Q-TOF/MS metabolomics analysis, 30 TS samples (21M, 9F) and 10 healthy controls (4M, 6F) and for targeted UHPLC/MS/MS analysis,35 TS samples (24M and 11F) and 14 healthy controls (9M, 5F) (include 30 TS samples and 10 healthy controls in untargeted analysis)	mean age TS: 7,9 years; controls: 9,2 years	Chinese	DSM-5 criteria for TS	Healthy controls without TS and other known infections	NA	NA	NA
Piras2020	additional	Metabolome	metabolite	Pediatric Acute-onset Neuropsychiatric Syndrome and Mycoplasma Pneumoniae Infection: A Case Report Analysis with a Metabolomics Approach	Piras C, Pintus R, Pruna D, Dessì A, Atzori L, Fanos V.	31642785	Curr Pediatr Rev. 2020;16(3):183-193. doi: 10.2174/1573396315666191022102925.	case report	Metabolites were identified based on literature information and by using dedicated databases, such as the Human Metabolome Database (HMDB) and the 500 MHz library from Chenomx NMR suite7.1. Metabolic pathways were generated by using MetaboAnalyst 3.0	Proton Nuclear Magnetic Resonance (1H-NMR)	Varian UNITY INOVA 500 spectrometer (Agilent Technologies, Inc., Santa Clara, CA, United States)	Urine	Variation in the concentration > 20% by comparing the metabolites in the urine before and after drug therapy.	Metabolites with a variation in the concentration > 20% by comparing the metabolites in the urine before and after drug therapy. The urine sample after drug therapy exhibited decreased content of homoserine, glycolate, glutamine, ethanolamine, hippurate, trigonelline, formate, cis-aconitate, valine, methylamine and dimethylguanidine, and an increased content of creatine-phosphate, proline, histid…	1 F	10 y	European ancestry (EU)	PANS before clarithromycin treatment	PANS after 10 days of the clarithromycin treatment when the symptoms were significantly improved	NA	Yes	NA
XiW2021	additional	Microbiome	metabolite	Depicting the composition of gut microbiota in children with tic disorders: an exploratory study	Xi W, Gao X, Zhao H, Luo X, Li J, Tan X, Wang L, Zhao JB, Wang J, Yang G, Liu LY, Wang YY, Peng L, Zou LP, Yang Y.	33738808	J Child Psychol Psychiatry. 2021 Oct;62(10):1246-1254. doi: 10.1111/jcpp.13409. Epub 2021 Mar 18.	case-control	Statistical analysis of the microbiome data was performed using MicrobiomeAnalyst 4.0 (Chong, Liu, Zhou & Xia, 2020). Low-quality sequencing reads (minimum count cut-off = 4, and prevalence in samples < 20%) and species with low variance (<10% inter-quantile range measure of variance) were filtered out. The species counts were transformed into centered log-ratio (CLR) to take into account the com…	shotgun metagenomic sequencing	Illumina Hiseq X Ten	Stool	Multivariate analysis with MaAsLin2 - metabolic pathways having significant associations (effect size > 0.5 and BH-adjusted p < .05) with clinical metadata of TD.	Multivariate analysis: only 4-aminobutanoate (GABA) degradation and lactose and galactose degradation were associated with TD. Univariate analysis indicated that the level of GABA degradation was significantly higher in TD than HC, for both treatment naıve and DRA-treated patients. Among the pathways that significantly associated with DRA treatment (Table S2), the levels of l-tryptophan biosynthe…	TD: 49 patients (38 M and 11F); Control TD: 39 M and 11 F	TD: mean age of 8.84 years (range 4–14); Control: mean age of 8.78 (range 4-14)	Chinese	Age of 4-14 and met diagnostic criteria of Tic Disordef (TD) according to the DSM-5.	Healthy volunteers matched on age, sex, and BMI to the TD group, and without any medical history of mental disorders, abdominal operation, or digestive system disease were recruited from a routine physical examination. The exclusion criteria for TD were also applied in the recruitment of healthy controls (HC).	Use of antibiotics, probiotics, high-dose vitamin or immunomodulatory medications within 4 weeks before the fecal sample collection, and conditions like any infective diseases or other severe diseases that may influence the gut microbiota.	Yes	NA
Quagliariello2018	additional	Microbiome	metabolite	Gut Microbiota Profiling and Gut-Brain Crosstalk in Children Affected by Pediatric Acute-Onset Neuropsychiatric Syndrome and Pediatric Autoimmune Neuropsychiatric Disorders Associated With Streptococcal Infections	Quagliariello A, Del Chierico F, Russo A, Reddel S, Conte G, Lopetuso LR, Ianiro G, Dallapiccola B, Cardona F, Gasbarrini A, Putignani L.	29686658	Front Microbiol. 2018 Apr 6;9:675. doi: 10.3389/fmicb.2018.00675. eCollection 2018.	case-control	Statistical analyses were computed using the R package, phyloseq, for α- and β-diversity, while the identification of differences in the relative abundances of taxa as well as the OTU correlation between PANS/PANDAS patients and CTRL subjects was assigned using Wilcoxon rank-sum (corrected for FDR) and Pearson tests (Hmisc package in R), respectively. Furthermore, the adonis function in the R pac…	metagenomic sequencing	454-Junior Genome Sequencer	Stool	KEGG biomarkers associated with the y-PAN and CTRL groups. A linear discriminant effect size (LeFse) analysis has been performed (α value = 0.05, logarithmic LDA score threshold = 2.0).	PANS/PANDAS patients showed an overall lower level of all α-biodiversity indices taken into account in this study, which was statistically significant using the Wilcoxon test for Observed (p < 0.01) and Chao1 indices (p < 0.05), while statistical significance was not reached for the Shannon index, although PANS/PANDAS subjects exhibited lower mean values. The particular gut microbiome (GM) compos…	PANS/PANDAS: 30 (20 Mand 10 F); Control: 70	4–16 years (average age 10.03 years, SD ± 3.47)	European ancestry (EU)	PANS/PANDAS (Diagnosis of PANS/PANDAS was made based on the current diagnostic criteria (Swedo et al., 2004; Chang et al., 2015))	healthy controls	Any inflammatory, infective, and/or chronic diseases at the time of the microbiota analysis; all antibiotic and pre-probiotic intake was to have been suspended beginning 4 or 2 months prior to the GM test for both PANS/PANDAS patients and CTRL	Yes	Gastrointestinal disorders, inflammatory and/or infective and/or chronic diseases, asthma, allergies
