# Supplementary material for: Molecular Landscape of Tourette’s Disorder
Source: Int J Mol Sci. 2023 Jan 11;24(2):1428. doi: 10.3390/ijms24021428 (PMC9865021; doi:10.3390/ijms24021428)
Supplement: Supplementary file 1 [file ijms-24-01428-s001.zip › supplementary Table S2.xlsx]

## Sheet: Table S2
Gene	Gene_name.HGNC	entrez_id	ensembl_gene_id.HGNC	hgnc_id.HGNC	alias_symbol.HGNC	prev_symbol.HGNC	location_sortable.HGNC	locus_group.HGNC	uniprot_ids.HGNC	MAGMA_P_0kb	MAGMA_P_100kb	MAGMA_BestP	MAGMA_0.001	FUMA_BWOF	FUMA_BWOF_Map	FUMA_BWOF_MapAnn	FUMA_BWF	FUMA_BWF_Map	FUMA_BWF_MapAnn	FUMA_BFF	FUMA_BFF_Map	FUMA_BFF_MapAnn	FUMA_AWOF	FUMA_AWOF_Map	FUMA_AWOF_MapAnn	FUMA_AWF	FUMA_AWF_Map	FUMA_AWF_MapAnn	FUMA_sum	FUMA_any	TWAS_P0.0005_PP3_0.2	CDGPGC2019_main	CDGPGC2019_ext	Reay2020_main	Peyrot2021_main	Yang2021_main	Yang2021_ext	Yu2019_GWASCat_main	CrossDisorder_main_sum	CrossDisorder_main_any	CrossDisorder_ext_sum	CrossDisorder_ext_any	Tsetsos2021_main	Abelson2005_main	ErcanSencicek2010_main	Sundaram2011_main	Willsey2017_main	Willsey2017_ext	Eriguchi2017_main
ACO2	aconitase 2	50	ENSG00000100412	HGNC:118	ACONM		22q13.2	protein-coding gene	Q99798	0.031718	0.031301	0.031301	0	1	CI	0|NA|Fetal_Cortex	1	CI	0|NA|Fetal_Cortex	1	CI	0|NA|Fetal_Cortex	1	CI	0|NA|Fetal_Cortex	1	CI	0|NA|Fetal_Cortex	4	1	NA	1	1	NA	NA	NA	NA	NA	1	1	1	1	NA	NA	NA	NA	NA	NA	NA
ACTR3	actin related protein 3	10096	ENSG00000115091	HGNC:170	ARP3		02q14.1	protein-coding gene	P61158	0.42029	0.58234	0.42029	0	0	NA	NA|NA|NA	0	NA	NA|NA|NA	0	NA	NA|NA|NA	0	NA	NA|NA|NA	0	NA	NA|NA|NA	0	NA	NA	NA	NA	NA	NA	NA	NA	NA	NA	NA	NA	NA	NA	NA	NA	NA	NA	NA	NA
ADSL	adenylosuccinate lyase	158	ENSG00000239900	HGNC:291			22q13.1	protein-coding gene	P30566	0.50257	0.83996	0.50257	0	0	NA	NA|NA|NA	0	NA	NA|NA|NA	0	NA	NA|NA|NA	1	eQTL	0|eQTLGen_cis_eQTLs|NA	0	NA	NA|NA|NA	1	1	NA	1	1	NA	NA	NA	NA	NA	1	1	1	1	NA	NA	NA	NA	NA	NA	NA
AEBP1	AE binding protein 1	165	ENSG00000106624	HGNC:303	ACLP		07p13	protein-coding gene	Q8IUX7	0.66958	0.91608	0.66958	0	0	NA	NA|NA|NA	0	NA	NA|NA|NA	0	NA	NA|NA|NA	0	NA	NA|NA|NA	0	NA	NA|NA|NA	0	NA	NA	NA	NA	NA	NA	NA	NA	NA	NA	NA	NA	NA	NA	NA	NA	NA	NA	NA	NA
AGBL4	AGBL carboxypeptidase 4	84871	ENSG00000186094	HGNC:25892	FLJ14442|CCP6		01p33	protein-coding gene	Q5VU57	0.81375	0.48162	0.48162	0	0	NA	NA|NA|NA	0	NA	NA|NA|NA	0	NA	NA|NA|NA	0	NA	NA|NA|NA	0	NA	NA|NA|NA	0	NA	NA	NA	NA	NA	NA	NA	NA	NA	NA	NA	NA	NA	NA	NA	NA	NA	NA	NA	NA
AGRN	agrin	375790	ENSG00000188157	HGNC:329		AGRIN	01p36.33	protein-coding gene	O00468	0.66327	0.76664	0.66327	0	0	NA	NA|NA|NA	0	NA	NA|NA|NA	0	NA	NA|NA|NA	0	NA	NA|NA|NA	0	NA	NA|NA|NA	0	NA	NA	NA	NA	NA	NA	NA	NA	NA	NA	NA	NA	NA	NA	NA	NA	NA	NA	NA	NA
APOM	apolipoprotein M	55937	ENSG00000204444	HGNC:13916	G3a|NG20		06p21.33	protein-coding gene	O95445	0.00088949	0.0017861	0.00088949	1	0	NA	NA|NA|NA	0	NA	NA|NA|NA	0	NA	NA|NA|NA	0	NA	NA|NA|NA	0	NA	NA|NA|NA	0	NA	NA	NA	NA	NA	NA	1	1	NA	1	1	1	1	NA	NA	NA	NA	NA	NA	NA
ARF3	ADP ribosylation factor 3	377	ENSG00000134287	HGNC:654			12q13.12	protein-coding gene	P61204	0.093605	0.090291	0.090291	0	1	eQTL	0|PsychENCODE_eQTLs|NA	0	NA	NA|NA|NA	0	NA	NA|NA|NA	1	eQTL	0|PsychENCODE_eQTLs:eQTLGen_cis_eQTLs:GTEx/v8/Whole_Blood|NA	1	eQTL	0|eQTLGen_cis_eQTLs|NA	3	1	1	NA	NA	NA	NA	NA	NA	NA	NA	NA	NA	NA	NA	NA	NA	NA	NA	NA	NA
ARL8B	ADP ribosylation factor like GTPase 8B	55207	ENSG00000134108	HGNC:25564	FLJ10702|Gie1	ARL10C	03p26.1	protein-coding gene	Q9NVJ2	0.66996	0.77905	0.66996	0	0	NA	NA|NA|NA	0	NA	NA|NA|NA	0	NA	NA|NA|NA	0	NA	NA|NA|NA	0	NA	NA|NA|NA	0	NA	NA	NA	NA	NA	NA	NA	NA	NA	NA	NA	NA	NA	NA	NA	NA	NA	NA	NA	NA
ASB8	ankyrin repeat and SOCS box containing 8	140461	ENSG00000177981	HGNC:17183	MGC5540|FLJ21255		12q13.11	protein-coding gene	Q9H765	0.0022545	0.008119	0.0022545	0	0	NA	NA|NA|NA	0	NA	NA|NA|NA	0	NA	NA|NA|NA	0	NA	NA|NA|NA	0	NA	NA|NA|NA	0	NA	1	NA	NA	NA	NA	NA	NA	NA	NA	NA	NA	NA	NA	NA	NA	NA	NA	NA	NA
ASH1L	ASH1 like histone lysine methyltransferase	55870	ENSG00000116539	HGNC:19088	huASH1|ASH1|ASH1L1|KMT2H		01q22	protein-coding gene	Q9NR48	0.42984	0.43574	0.42984	0	0	NA	NA|NA|NA	0	NA	NA|NA|NA	0	NA	NA|NA|NA	0	NA	NA|NA|NA	0	NA	NA|NA|NA	0	NA	NA	NA	NA	NA	NA	NA	NA	NA	NA	NA	NA	NA	NA	NA	NA	NA	NA	NA	NA
ASTN2	astrotactin 2	23245	ENSG00000148219	HGNC:17021	KIAA0634		09q33.1	protein-coding gene	O75129	0.49585	0.44615	0.44615	0	0	NA	NA|NA|NA	0	NA	NA|NA|NA	0	NA	NA|NA|NA	0	NA	NA|NA|NA	0	NA	NA|NA|NA	0	NA	NA	NA	NA	NA	NA	NA	NA	NA	NA	NA	NA	NA	NA	NA	NA	NA	NA	NA	NA
BBX	BBX high mobility group box domain containing	56987	ENSG00000114439	HGNC:14422	MDS001|HSPC339|HBP2		03q13.12	protein-coding gene	Q8WY36	0.094944	0.15227	0.094944	0	0	NA	NA|NA|NA	0	NA	NA|NA|NA	0	NA	NA|NA|NA	0	NA	NA|NA|NA	0	NA	NA|NA|NA	0	NA	NA	NA	NA	NA	NA	1	1	NA	1	1	1	1	NA	NA	NA	NA	NA	NA	NA
BCL11A	BAF chromatin remodeling complex subunit BCL11A	53335	ENSG00000119866	HGNC:13221	BCL11A-XL|BCL11A-L|BCL11A-S|CTIP1|HBFQTL5|ZNF856|SMARCM1	EVI9	02p16.1	protein-coding gene	Q9H165	0.14134	0.1365	0.1365	0	0	NA	NA|NA|NA	0	NA	NA|NA|NA	0	NA	NA|NA|NA	1	CI	0|NA|IMR90:Mesenchymal_Stem_Cell:Mesendoderm:Trophoblast-like_Cell:hESC	0	NA	NA|NA|NA	1	1	NA	NA	NA	NA	NA	NA	NA	NA	NA	NA	NA	NA	NA	NA	NA	NA	NA	NA	NA
BCL7A	BAF chromatin remodeling complex subunit BCL7A	605	ENSG00000110987	HGNC:1004	SMARCJ1	BCL7	12q24.31	protein-coding gene	Q4VC05	1.9875e-05	0.00037412	1.9875e-05	1	0	NA	NA|NA|NA	0	NA	NA|NA|NA	0	NA	NA|NA|NA	0	NA	NA|NA|NA	0	NA	NA|NA|NA	0	NA	1	NA	NA	1	NA	NA	NA	NA	1	1	1	1	NA	NA	NA	NA	NA	NA	NA
BIRC6	baculoviral IAP repeat containing 6	57448	ENSG00000115760	HGNC:13516	BRUCE		02p22.3	protein-coding gene	Q9NR09	0.42554	0.17741	0.17741	0	0	NA	NA|NA|NA	0	NA	NA|NA|NA	0	NA	NA|NA|NA	0	NA	NA|NA|NA	0	NA	NA|NA|NA	0	NA	NA	NA	NA	NA	NA	NA	NA	NA	NA	NA	NA	NA	NA	NA	NA	NA	NA	NA	NA
BRPF3	bromodomain and PHD finger containing 3	27154	ENSG00000096070	HGNC:14256	KIAA1286		06p21.31	protein-coding gene	Q9ULD4	0.67678	0.32442	0.32442	0	1	eQTL	0|GTEx/v8/Brain_Cerebellum|NA	0	NA	NA|NA|NA	0	NA	NA|NA|NA	1	eQTL	0|GTEx/v8/Brain_Cerebellum|NA	0	NA	NA|NA|NA	2	1	NA	NA	NA	NA	NA	NA	NA	NA	NA	NA	NA	NA	NA	NA	NA	NA	NA	NA	NA
C1QL4	complement C1q like 4	338761	ENSG00000186897	HGNC:31416	C1QTNF11|CTRP11		12q13.12	protein-coding gene	Q86Z23	0.00031626	8.2535e-06	8.2535e-06	1	1	Positional,eQTL	4|GTEx/v8/Brain_Hippocampus|NA	1	Positional,eQTL	1|GTEx/v8/Brain_Hippocampus|NA	1	Positional,eQTL	1|GTEx/v8/Brain_Hippocampus|NA	1	Positional,eQTL	4|eQTLcatalogue/TwinsUK_ge_skin:GTEx/v8/Brain_Hippocampus:GTEx/v8/Breast_Mammary_Tissue:GTEx/v8/Pituitary:GTEx/v8/Prostate:GTEx/v8/Minor_Salivary_Gland:GTEx/v8/Skin_Not_Sun_Exposed_Suprapubic:GTEx/v8/Skin_Sun_Exposed_Lower_leg:GTEx/v8/Testis:GTEx/v8/Thyroid|Spleen:GM12878:IMR90:Mesenchymal_Stem_Cell:Trophoblast-like_Cell	1	Positional,eQTL	1|eQTLcatalogue/TwinsUK_ge_skin:GTEx/v8/Brain_Hippocampus:GTEx/v8/Breast_Mammary_Tissue:GTEx/v8/Pituitary:GTEx/v8/Prostate:GTEx/v8/Minor_Salivary_Gland:GTEx/v8/Skin_Not_Sun_Exposed_Suprapubic:GTEx/v8/Skin_Sun_Exposed_Lower_leg:GTEx/v8/Testis:GTEx/v8/Thyroid|NA	4	1	1	NA	NA	NA	NA	NA	NA	NA	NA	NA	NA	NA	NA	NA	NA	NA	NA	NA	NA
CCDC92	coiled-coil domain containing 92	80212	ENSG00000119242	HGNC:29563	FLJ22471		12q24.31	protein-coding gene	Q53HC0	0.0040607	0.002972	0.002972	0	0	NA	NA|NA|NA	0	NA	NA|NA|NA	0	NA	NA|NA|NA	0	NA	NA|NA|NA	0	NA	NA|NA|NA	0	NA	1	NA	NA	NA	1	NA	NA	NA	1	1	1	1	NA	NA	NA	NA	NA	NA	NA
CD276	CD276 molecule	80381	ENSG00000103855	HGNC:19137	B7-H3|B7H3|B7RP-2		15q24.1	protein-coding gene	Q5ZPR3	0.050472	0.00072835	0.00072835	1	1	Positional,eQTL	4|CMC_SVA_cis|NA	0	NA	NA|NA|NA	0	NA	NA|NA|NA	1	Positional,eQTL	4|CMC_SVA_cis:GTEx/v8/Colon_Transverse:GTEx/v8/Heart_Left_Ventricle|IMR90:Mesenchymal_Stem_Cell:Mesendoderm:hESC	1	CI	0|NA|IMR90:Mesenchymal_Stem_Cell:Mesendoderm:hESC	3	1	1	NA	NA	NA	NA	NA	NA	1	1	1	1	1	NA	NA	NA	NA	NA	NA	NA
CDHR1	cadherin related family member 1	92211	ENSG00000148600	HGNC:14550	KIAA1775|CORD15|RP65	PCDH21	10q23.1	protein-coding gene	Q96JP9	0.77031	0.55855	0.55855	0	0	NA	NA|NA|NA	0	NA	NA|NA|NA	0	NA	NA|NA|NA	0	NA	NA|NA|NA	0	NA	NA|NA|NA	0	NA	NA	NA	NA	NA	NA	NA	NA	NA	NA	NA	NA	NA	NA	NA	NA	NA	NA	NA	NA
CDKN1A	cyclin dependent kinase inhibitor 1A	1026	ENSG00000124762	HGNC:1784	P21|CIP1|WAF1|SDI1|CAP20|p21CIP1|p21Cip1/Waf1|p21	CDKN1	06p21.2	protein-coding gene	P38936	0.016892	8.7128e-05	8.7128e-05	1	1	Positional	39|NA|NA	0	NA	NA|NA|NA	0	NA	NA|NA|NA	1	Positional,eQTL	39|eQTLcatalogue/Fairfax_2014_naive:eQTLGen_cis_eQTLs|NA	0	NA	NA|NA|NA	2	1	NA	NA	NA	NA	NA	NA	NA	NA	NA	NA	NA	NA	1	NA	NA	NA	NA	NA	NA
CEP128	centrosomal protein 128	145508	ENSG00000100629	HGNC:20359		C14orf61|C14orf145	14q31.1	protein-coding gene	Q6ZU80	0.54348	0.34941	0.34941	0	1	eQTL	0|BRAINEAC/PUTM|NA	0	NA	NA|NA|NA	0	NA	NA|NA|NA	1	eQTL,CI	0|eQTLGen_cis_eQTLs:BRAINEAC/PUTM|Liver:GM12878:IMR90:Mesenchymal_Stem_Cell:Mesendoderm:Trophoblast-like_Cell:hESC	0	NA	NA|NA|NA	2	1	NA	NA	NA	NA	NA	NA	NA	NA	NA	NA	NA	NA	NA	NA	NA	NA	NA	NA	NA
CEPT1	choline/ethanolamine phosphotransferase 1	10390	ENSG00000134255	HGNC:24289			01p13.3	protein-coding gene	Q9Y6K0	0.00090015	0.021064	0.00090015	1	0	NA	NA|NA|NA	0	NA	NA|NA|NA	0	NA	NA|NA|NA	0	NA	NA|NA|NA	0	NA	NA|NA|NA	0	NA	NA	NA	NA	NA	NA	NA	NA	NA	NA	NA	NA	NA	NA	NA	NA	NA	NA	NA	NA
CHADL	chondroadherin like	150356	ENSG00000100399	HGNC:25165	SLRR4B		22q13.2	protein-coding gene	Q6NUI6	0.0053535	0.0011854	0.0011854	0	1	Positional,eQTL	9|PsychENCODE_eQTLs:CMC_NoSVA_cis|NA	1	eQTL	0|PsychENCODE_eQTLs|NA	1	eQTL	0|PsychENCODE_eQTLs|NA	1	Positional,eQTL	9|PsychENCODE_eQTLs:CMC_NoSVA_cis:GTEx/v8/Colon_Sigmoid:GTEx/v8/Nerve_Tibial|NA	1	eQTL	0|PsychENCODE_eQTLs:GTEx/v8/Colon_Sigmoid:GTEx/v8/Nerve_Tibial|NA	4	1	NA	1	1	NA	NA	NA	NA	NA	1	1	1	1	NA	NA	NA	NA	NA	NA	NA
CHGB	chromogranin B	1114	ENSG00000089199	HGNC:1930	SgI	SCG1	20p12.3	protein-coding gene	P05060	0.00090831	0.057622	0.00090831	1	0	NA	NA|NA|NA	0	NA	NA|NA|NA	0	NA	NA|NA|NA	0	NA	NA|NA|NA	0	NA	NA|NA|NA	0	NA	1	NA	NA	NA	NA	NA	NA	NA	NA	NA	NA	NA	NA	NA	NA	NA	NA	NA	NA
CKB	creatine kinase B	1152	ENSG00000166165	HGNC:1991		CKBB	14q32.33	protein-coding gene	P12277	0.016884	0.02898	0.016884	0	0	NA	NA|NA|NA	0	NA	NA|NA|NA	0	NA	NA|NA|NA	0	NA	NA|NA|NA	0	NA	NA|NA|NA	0	NA	NA	1	1	1	NA	NA	NA	NA	2	1	2	1	NA	NA	NA	NA	NA	NA	NA
CLCN2	chloride voltage-gated channel 2	1181	ENSG00000114859	HGNC:2020	CLC2|EJM6|ClC-2		03q27.1	protein-coding gene	P51788	0.186	0.020925	0.020925	0	0	NA	NA|NA|NA	0	NA	NA|NA|NA	0	NA	NA|NA|NA	0	NA	NA|NA|NA	0	NA	NA|NA|NA	0	NA	NA	NA	NA	NA	NA	NA	NA	NA	NA	NA	NA	NA	NA	NA	NA	NA	NA	NA	NA
CNTN6	contactin 6	27255	ENSG00000134115	HGNC:2176	NB-3		03p26.3	protein-coding gene	Q9UQ52	0.26729	0.39105	0.26729	0	0	NA	NA|NA|NA	0	NA	NA|NA|NA	0	NA	NA|NA|NA	0	NA	NA|NA|NA	0	NA	NA|NA|NA	0	NA	NA	NA	NA	NA	NA	NA	NA	NA	NA	NA	NA	NA	NA	NA	NA	NA	NA	NA	NA
CNTNAP2	contactin associated protein 2	26047	ENSG00000174469	HGNC:13830	Caspr2|KIAA0868|NRXN4		07q35-q36.1	protein-coding gene	Q9UHC6	0.043833	0.047014	0.043833	0	0	NA	NA|NA|NA	0	NA	NA|NA|NA	0	NA	NA|NA|NA	0	NA	NA|NA|NA	0	NA	NA|NA|NA	0	NA	NA	NA	NA	NA	NA	NA	NA	NA	NA	NA	NA	NA	NA	NA	NA	NA	NA	NA	NA
COL8A1	collagen type VIII alpha 1 chain	1295	ENSG00000144810	HGNC:2215	MGC9568	C3orf7	03q12.1	protein-coding gene	P27658	0.71173	0.75509	0.71173	0	0	NA	NA|NA|NA	0	NA	NA|NA|NA	0	NA	NA|NA|NA	0	NA	NA|NA|NA	0	NA	NA|NA|NA	0	NA	NA	NA	NA	NA	NA	NA	NA	NA	NA	NA	NA	NA	NA	NA	NA	NA	NA	NA	NA
CPS1	carbamoyl-phosphate synthase 1	1373	ENSG00000021826	HGNC:2323	GATD6		02q34	protein-coding gene	P31327	0.38854	0.40072	0.38854	0	0	NA	NA|NA|NA	0	NA	NA|NA|NA	0	NA	NA|NA|NA	0	NA	NA|NA|NA	0	NA	NA|NA|NA	0	NA	NA	NA	NA	NA	NA	NA	NA	NA	NA	NA	NA	NA	NA	NA	NA	NA	NA	NA	NA
CSGALNACT2	chondroitin sulfate N-acetylgalactosaminyltransferase 2	55454	ENSG00000169826	HGNC:24292	GALNACT2|MGC40204|PRO0082|GALNACT-2		10q11.21	protein-coding gene	Q8N6G5	0.0026011	0.00058303	0.00058303	1	0	NA	NA|NA|NA	0	NA	NA|NA|NA	0	NA	NA|NA|NA	1	eQTL	0|GTEx/v8/Esophagus_Muscularis:GTEx/v8/Thyroid|NA	0	NA	NA|NA|NA	1	1	1	NA	NA	NA	NA	NA	NA	NA	NA	NA	NA	NA	NA	NA	NA	NA	NA	NA	NA
CXXC4	CXXC finger protein 4	80319	ENSG00000168772	HGNC:24593	IDAX		04q24	protein-coding gene	Q9H2H0	0.014881	0.062668	0.014881	0	0	NA	NA|NA|NA	0	NA	NA|NA|NA	0	NA	NA|NA|NA	0	NA	NA|NA|NA	0	NA	NA|NA|NA	0	NA	NA	NA	NA	1	NA	1	1	NA	2	1	2	1	NA	NA	NA	NA	NA	NA	NA
DCAF12	DDB1 and CUL4 associated factor 12	25853	ENSG00000198876	HGNC:19911	DKFZP434O125|MGC1058|CT102|TCC52	KIAA1892|WDR40A	09p13.3	protein-coding gene	Q5T6F0	0.031785	0.00090353	0.00090353	1	0	NA	NA|NA|NA	0	NA	NA|NA|NA	0	NA	NA|NA|NA	0	NA	NA|NA|NA	0	NA	NA|NA|NA	0	NA	NA	NA	NA	NA	NA	NA	NA	NA	NA	NA	NA	NA	1	NA	NA	NA	NA	NA	NA
DESI1	desumoylating isopeptidase 1	27351	ENSG00000100418	HGNC:24577	D15Wsu75e|DESI-1|POST	FAM152B|PPPDE2	22q13.2	protein-coding gene	Q6ICB0	0.13438	0.085809	0.085809	0	1	CI	0|NA|Promoter_anchored_loops	1	CI	0|NA|Promoter_anchored_loops	1	CI	0|NA|Promoter_anchored_loops	1	eQTL,CI	0|eQTLGen_cis_eQTLs|Promoter_anchored_loops:Left_Ventricle	1	CI	0|NA|Promoter_anchored_loops:Left_Ventricle	4	1	NA	1	1	NA	NA	NA	NA	NA	1	1	1	1	NA	NA	NA	NA	NA	NA	NA
DGKQ	diacylglycerol kinase theta	1609	ENSG00000145214	HGNC:2856	DAGK|DAGK7	DAGK4	04p16.3	protein-coding gene	P52824	0.022757	0.010249	0.010249	0	0	NA	NA|NA|NA	0	NA	NA|NA|NA	0	NA	NA|NA|NA	0	NA	NA|NA|NA	0	NA	NA|NA|NA	0	NA	1	NA	NA	NA	NA	NA	NA	NA	NA	NA	NA	NA	NA	NA	NA	NA	NA	NA	NA
DHX57	DExH-box helicase 57	90957	ENSG00000163214	HGNC:20086	DDX57		02p22.1	protein-coding gene	Q6P158	0.0016278	0.00046993	0.00046993	1	0	NA	NA|NA|NA	0	NA	NA|NA|NA	0	NA	NA|NA|NA	0	NA	NA|NA|NA	0	NA	NA|NA|NA	0	NA	1	NA	NA	NA	NA	NA	NA	NA	NA	NA	NA	NA	NA	NA	NA	NA	NA	NA	NA
DIO2	iodothyronine deiodinase 2	1734	ENSG00000211448	HGNC:2884	TXDI2|SelY|SELENOY		14q31.1	protein-coding gene	Q92813	0.50956	0.20584	0.20584	0	0	NA	NA|NA|NA	0	NA	NA|NA|NA	0	NA	NA|NA|NA	0	NA	NA|NA|NA	0	NA	NA|NA|NA	0	NA	NA	NA	NA	NA	NA	NA	NA	NA	NA	NA	NA	NA	NA	NA	NA	NA	NA	NA	NA
DNAH11	dynein axonemal heavy chain 11	8701	ENSG00000105877	HGNC:2942	Dnahc11|DPL11|CILD7|DNAHC11|DNAHBL|DNHBL		07p15.3	protein-coding gene	Q96DT5	0.90304	0.94244	0.90304	0	0	NA	NA|NA|NA	0	NA	NA|NA|NA	0	NA	NA|NA|NA	0	NA	NA|NA|NA	0	NA	NA|NA|NA	0	NA	NA	NA	NA	NA	NA	NA	NA	NA	NA	NA	NA	NA	NA	NA	NA	NA	NA	NA	NA
DNAJC13	DnaJ heat shock protein family (Hsp40) member C13	23317	ENSG00000138246	HGNC:30343	RME8|KIAA0678		03q22.1	protein-coding gene	O75165	0.89529	0.76585	0.76585	0	0	NA	NA|NA|NA	0	NA	NA|NA|NA	0	NA	NA|NA|NA	0	NA	NA|NA|NA	0	NA	NA|NA|NA	0	NA	NA	NA	NA	NA	NA	NA	NA	NA	NA	NA	NA	NA	NA	NA	NA	1	NA	NA	NA
DNAJC18	DnaJ heat shock protein family (Hsp40) member C18	202052	ENSG00000170464	HGNC:28429	MGC29463		05q31.2	protein-coding gene	Q9H819	0.00054708	0.00041969	0.00041969	1	0	NA	NA|NA|NA	0	NA	NA|NA|NA	0	NA	NA|NA|NA	0	NA	NA|NA|NA	0	NA	NA|NA|NA	0	NA	1	NA	NA	NA	NA	NA	NA	NA	NA	NA	NA	NA	NA	NA	NA	NA	NA	NA	NA
DNAJC22	DnaJ heat shock protein family (Hsp40) member C22	79962	ENSG00000178401	HGNC:25802	wus|FLJ13236		12q13.12	protein-coding gene	Q8N4W6	0.06859	3.2311e-06	3.2311e-06	1	1	Positional	2|NA|NA	0	NA	NA|NA|NA	0	NA	NA|NA|NA	1	Positional,eQTL	2|eQTLcatalogue/TwinsUK_ge_skin:GTEx/v8/Adipose_Visceral_Omentum:GTEx/v8/Skin_Not_Sun_Exposed_Suprapubic:GTEx/v8/Skin_Sun_Exposed_Lower_leg:GTEx/v8/Thyroid|Spleen:GM12878:IMR90:Mesenchymal_Stem_Cell:Trophoblast-like_Cell	1	eQTL	0|eQTLcatalogue/TwinsUK_ge_skin:GTEx/v8/Skin_Not_Sun_Exposed_Suprapubic:GTEx/v8/Skin_Sun_Exposed_Lower_leg:GTEx/v8/Thyroid|NA	3	1	NA	NA	NA	NA	NA	NA	NA	NA	NA	NA	NA	NA	1	NA	NA	NA	NA	NA	NA
DOP1B	DOP1 leucine zipper like protein B	9980	ENSG00000142197	HGNC:1291	KIAA0933	C21orf5|DOPEY2	21q22.12	protein-coding gene	Q9Y3R5	0.1709	0.30187	0.1709	0	0	NA	NA|NA|NA	0	NA	NA|NA|NA	0	NA	NA|NA|NA	0	NA	NA|NA|NA	0	NA	NA|NA|NA	0	NA	NA	NA	NA	NA	NA	NA	NA	NA	NA	NA	NA	NA	NA	NA	NA	NA	NA	NA	NA
EDC4	enhancer of mRNA decapping 4	23644	ENSG00000038358	HGNC:17157	RCD-8|Ge-1|HEDLS		16q22.1	protein-coding gene	Q6P2E9	0.009203	0.0058504	0.0058504	0	0	NA	NA|NA|NA	0	NA	NA|NA|NA	0	NA	NA|NA|NA	0	NA	NA|NA|NA	0	NA	NA|NA|NA	0	NA	NA	NA	NA	1	NA	NA	NA	NA	1	1	1	1	NA	NA	NA	NA	NA	NA	NA
EFL1	elongation factor like GTPase 1	79631	ENSG00000140598	HGNC:25789	FLJ13119|FAM42A|HsT19294|RIA1	EFTUD1	15q25.2	protein-coding gene	Q7Z2Z2	0.005138	0.0073228	0.005138	0	1	Positional	24|NA|NA	1	Positional	1|NA|NA	1	Positional	1|NA|NA	1	Positional,eQTL	24|eQTLGen_cis_eQTLs:GTEx/v8/Testis|Mesenchymal_Stem_Cell:Mesendoderm:hESC	1	Positional,eQTL	1|eQTLGen_cis_eQTLs:GTEx/v8/Testis|NA	4	1	NA	NA	NA	NA	NA	NA	NA	1	1	1	1	1	NA	NA	NA	NA	NA	NA	NA
ENO1	enolase 1	2023	ENSG00000074800	HGNC:3350	PPH|MBP-1	ENO1L1|MPB1	01p36.23	protein-coding gene	P06733	0.89135	0.069589	0.069589	0	0	NA	NA|NA|NA	0	NA	NA|NA|NA	0	NA	NA|NA|NA	0	NA	NA|NA|NA	0	NA	NA|NA|NA	0	NA	NA	1	1	NA	NA	NA	NA	NA	1	1	1	1	NA	NA	NA	NA	NA	NA	NA
EP300	E1A binding protein p300	2033	ENSG00000100393	HGNC:3373	p300|KAT3B		22q13.2	protein-coding gene	Q09472	0.001678	0.00095934	0.00095934	1	1	Positional,eQTL	29|CMC_SVA_cis:GTEx/v8/Brain_Cerebellum:GTEx/v8/Brain_Hypothalamus|NA	1	Positional,eQTL	2|GTEx/v8/Brain_Cerebellum:GTEx/v8/Brain_Hypothalamus|NA	1	Positional,eQTL	2|GTEx/v8/Brain_Cerebellum:GTEx/v8/Brain_Hypothalamus|NA	1	Positional,eQTL	29|eQTLcatalogue/CEDAR_T-cell_CD4:eQTLcatalogue/CEDAR_T-cell_CD8:eQTLcatalogue/Fairfax_2012_B-cell_CD19:eQTLcatalogue/Fairfax_2014_naive:eQTLGen_cis_eQTLs:BIOSQTL/BIOS_eQTL_geneLevel:CMC_SVA_cis:GTEx/v8/Artery_Tibial:GTEx/v8/Brain_Cerebellum:GTEx/v8/Brain_Hypothalamus:GTEx/v8/Nerve_Tibial:GTEx/v8/Skin_Not_Sun_Exposed_Suprapubic:GTEx/v8/Skin_Sun_Exposed_Lower_leg|IMR90:Mesenchymal_Stem_Cell	1	Positional,eQTL	2|eQTLcatalogue/CEDAR_T-cell_CD8:eQTLcatalogue/Fairfax_2012_B-cell_CD19:eQTLcatalogue/Fairfax_2014_naive:eQTLGen_cis_eQTLs:BIOSQTL/BIOS_eQTL_geneLevel:GTEx/v8/Artery_Tibial:GTEx/v8/Brain_Cerebellum:GTEx/v8/Brain_Hypothalamus:GTEx/v8/Nerve_Tibial:GTEx/v8/Skin_Not_Sun_Exposed_Suprapubic:GTEx/v8/Skin_Sun_Exposed_Lower_leg|IMR90:Mesenchymal_Stem_Cell	4	1	NA	1	1	1	NA	NA	NA	NA	2	1	2	1	1	NA	NA	NA	NA	NA	NA
EPB41	erythrocyte membrane protein band 4.1	2035	ENSG00000159023	HGNC:3377	4.1R	EL1	01p35.3	protein-coding gene	P11171	0.0051165	0.0009471	0.0009471	1	1	Positional,eQTL	1|CMC_SVA_cis|NA	0	NA	NA|NA|NA	0	NA	NA|NA|NA	1	Positional,eQTL	1|eQTLcatalogue/TwinsUK_ge_fat:eQTLGen_cis_eQTLs:CMC_SVA_cis:GTEx/v8/Adipose_Subcutaneous:GTEx/v8/Muscle_Skeletal|Promoter_anchored_loops	1	eQTL	0|eQTLcatalogue/TwinsUK_ge_fat:eQTLGen_cis_eQTLs:GTEx/v8/Adipose_Subcutaneous:GTEx/v8/Muscle_Skeletal|NA	3	1	NA	NA	NA	NA	NA	NA	NA	NA	NA	NA	NA	NA	NA	NA	NA	NA	NA	NA	NA
ERCC5	ERCC excision repair 5, endonuclease	2073	ENSG00000134899	HGNC:3437		ERCM2|XPGC	13q33.1	protein-coding gene	P28715	0.38958	0.79222	0.38958	0	0	NA	NA|NA|NA	0	NA	NA|NA|NA	0	NA	NA|NA|NA	0	NA	NA|NA|NA	0	NA	NA|NA|NA	0	NA	NA	NA	NA	NA	NA	NA	NA	NA	NA	NA	NA	NA	NA	NA	NA	NA	NA	NA	NA
ESS2	ess-2 splicing factor homolog	8220	ENSG00000100056	HGNC:16817	DGSI|Es2el|ES2|DGS-H|ESS-2|bis1	DGCR13|DGCR14	22q11.21	protein-coding gene	Q96DF8	0.28244	0.8339	0.28244	0	0	NA	NA|NA|NA	0	NA	NA|NA|NA	0	NA	NA|NA|NA	0	NA	NA|NA|NA	0	NA	NA|NA|NA	0	NA	NA	NA	NA	NA	NA	NA	NA	NA	NA	NA	NA	NA	NA	NA	NA	NA	NA	NA	NA
FAM193B	family with sequence similarity 193 member B	54540	ENSG00000146067	HGNC:25524	KIAA1931|FLJ10404|IRIZIO		05q35.3	protein-coding gene	Q96PV7	0.00023496	0.0040358	0.00023496	1	0	NA	NA|NA|NA	0	NA	NA|NA|NA	0	NA	NA|NA|NA	0	NA	NA|NA|NA	0	NA	NA|NA|NA	0	NA	1	NA	NA	NA	NA	NA	NA	NA	NA	NA	NA	NA	NA	NA	NA	NA	NA	NA	NA
FIP1L1	factor interacting with PAPOLA and CPSF1	81608	ENSG00000145216	HGNC:19124	DKFZp586K0717|FIP1|hFip1		04q12	protein-coding gene	Q6UN15	0.0027259	0.00072129	0.00072129	1	0	NA	NA|NA|NA	0	NA	NA|NA|NA	0	NA	NA|NA|NA	0	NA	NA|NA|NA	0	NA	NA|NA|NA	0	NA	NA	NA	NA	NA	NA	NA	NA	NA	NA	NA	NA	NA	NA	NA	NA	NA	NA	NA	NA
FKBP11	FKBP prolyl isomerase 11	51303	ENSG00000134285	HGNC:18624	FKBP19		12q13.12	protein-coding gene	Q9NYL4	0.038477	0.10111	0.038477	0	0	NA	NA|NA|NA	0	NA	NA|NA|NA	0	NA	NA|NA|NA	1	eQTL	0|eQTLGen_cis_eQTLs|NA	1	eQTL	0|eQTLGen_cis_eQTLs|NA	2	1	NA	NA	NA	NA	NA	NA	NA	NA	NA	NA	NA	NA	NA	NA	NA	NA	NA	NA	NA
FLT3	fms related receptor tyrosine kinase 3	2322	ENSG00000122025	HGNC:3765	STK1|FLK2|CD135		13q12.2	protein-coding gene	P36888	1.1843e-06	1.0578e-06	1.0578e-06	1	1	Positional,eQTL	187|eQTLcatalogue/BrainSeq_ge_brain:PsychENCODE_eQTLs:CMC_SVA_cis:CMC_NoSVA_cis:BRAINEAC/CRBL:BRAINEAC/FCTX:BRAINEAC/OCTX:BRAINEAC/TCTX:BRAINEAC/aveALL:GTEx/v8/Brain_Anterior_cingulate_cortex_BA24:GTEx/v8/Brain_Caudate_basal_ganglia:GTEx/v8/Brain_Cerebellar_Hemisphere:GTEx/v8/Brain_Cerebellum:GTEx/v8/Brain_Cortex:GTEx/v8/Brain_Frontal_Cortex_BA9:GTEx/v8/Brain_Hippocampus:GTEx/v8/Brain_Hypothalamu…	1	Positional,eQTL	4|eQTLcatalogue/BrainSeq_ge_brain:PsychENCODE_eQTLs:CMC_SVA_cis:CMC_NoSVA_cis:BRAINEAC/CRBL:BRAINEAC/OCTX:BRAINEAC/TCTX:GTEx/v8/Brain_Anterior_cingulate_cortex_BA24:GTEx/v8/Brain_Caudate_basal_ganglia:GTEx/v8/Brain_Cerebellar_Hemisphere:GTEx/v8/Brain_Cerebellum:GTEx/v8/Brain_Cortex:GTEx/v8/Brain_Frontal_Cortex_BA9:GTEx/v8/Brain_Hippocampus:GTEx/v8/Brain_Hypothalamus:GTEx/v8/Brain_Nucleus_accumben…	0	NA	NA|NA|NA	1	Positional,eQTL	187|eQTLcatalogue/BrainSeq_ge_brain:eQTLcatalogue/TwinsUK_ge_skin:PsychENCODE_eQTLs:eQTLGen_cis_eQTLs:CMC_SVA_cis:CMC_NoSVA_cis:BRAINEAC/CRBL:BRAINEAC/FCTX:BRAINEAC/OCTX:BRAINEAC/TCTX:BRAINEAC/aveALL:GTEx/v8/Adipose_Subcutaneous:GTEx/v8/Adipose_Visceral_Omentum:GTEx/v8/Artery_Coronary:GTEx/v8/Artery_Tibial:GTEx/v8/Brain_Anterior_cingulate_cortex_BA24:GTEx/v8/Brain_Caudate_basal_ganglia:GTEx/v8/Br…	1	Positional,eQTL	4|eQTLcatalogue/BrainSeq_ge_brain:eQTLcatalogue/TwinsUK_ge_skin:PsychENCODE_eQTLs:eQTLGen_cis_eQTLs:CMC_SVA_cis:CMC_NoSVA_cis:BRAINEAC/CRBL:BRAINEAC/OCTX:BRAINEAC/TCTX:GTEx/v8/Adipose_Subcutaneous:GTEx/v8/Adipose_Visceral_Omentum:GTEx/v8/Artery_Coronary:GTEx/v8/Brain_Anterior_cingulate_cortex_BA24:GTEx/v8/Brain_Caudate_basal_ganglia:GTEx/v8/Brain_Cerebellar_Hemisphere:GTEx/v8/Brain_Cerebellum:GTE…	4	1	1	NA	NA	NA	NA	NA	NA	1	1	1	1	1	NA	NA	NA	NA	NA	NA	NA
FN1	fibronectin 1	2335	ENSG00000115414	HGNC:3778	MSF|CIG|LETS|GFND2|FINC		02q35	protein-coding gene	P02751	0.24753	0.649	0.24753	0	0	NA	NA|NA|NA	0	NA	NA|NA|NA	0	NA	NA|NA|NA	0	NA	NA|NA|NA	0	NA	NA|NA|NA	0	NA	NA	NA	NA	NA	NA	NA	NA	NA	NA	NA	NA	NA	NA	NA	NA	NA	1	1	NA
FPR1	formyl peptide receptor 1	2357	ENSG00000171051	HGNC:3826	FPR|FMLP		19q13.41	protein-coding gene	P21462	0.2016	0.0091332	0.0091332	0	1	Positional	1|NA|NA	0	NA	NA|NA|NA	0	NA	NA|NA|NA	1	Positional,eQTL	1|eQTLGen_cis_eQTLs|NA	0	NA	NA|NA|NA	2	1	NA	NA	NA	NA	NA	NA	NA	NA	NA	NA	NA	NA	NA	NA	NA	NA	NA	NA	NA
FPR2	formyl peptide receptor 2	2358	ENSG00000171049	HGNC:3827	LXA4R|HM63|FPRH2|FMLPX|FPR2A|FMLP-R-II|ALXR|ALX	FPRL1	19q13.41	protein-coding gene	P25090	0.50766	0.016872	0.016872	0	0	NA	NA|NA|NA	0	NA	NA|NA|NA	0	NA	NA|NA|NA	1	eQTL	0|eQTLGen_cis_eQTLs:BIOSQTL/BIOS_eQTL_geneLevel|NA	0	NA	NA|NA|NA	1	1	NA	NA	NA	NA	NA	NA	NA	NA	NA	NA	NA	NA	NA	NA	NA	NA	NA	NA	NA
FPR3	formyl peptide receptor 3	2359	ENSG00000187474	HGNC:3828	FPRH1|FMLPY|RMLP-R-I	FPRL2	19q13.41	protein-coding gene	P25089	0.034427	0.074522	0.034427	0	1	Positional	2|NA|NA	0	NA	NA|NA|NA	0	NA	NA|NA|NA	1	Positional,eQTL	2|eQTLcatalogue/GENCORD_ge_fibroblast:eQTLGen_cis_eQTLs:BIOSQTL/BIOS_eQTL_geneLevel:GTEx/v8/Testis:GTEx/v8/Thyroid|NA	0	NA	NA|NA|NA	2	1	NA	NA	NA	NA	NA	NA	NA	1	1	1	1	1	NA	NA	NA	NA	NA	NA	NA
GABRA2	gamma-aminobutyric acid type A receptor subunit alpha2	2555	ENSG00000151834	HGNC:4076			04p12	protein-coding gene	P47869	0.0087872	0.0034915	0.0034915	0	1	eQTL	0|PsychENCODE_eQTLs:CMC_SVA_cis:BRAINEAC/WHMT|NA	0	NA	NA|NA|NA	0	NA	NA|NA|NA	1	eQTL	0|PsychENCODE_eQTLs:CMC_SVA_cis:BRAINEAC/WHMT:GTEx/v8/Adipose_Subcutaneous:GTEx/v8/Breast_Mammary_Tissue:GTEx/v8/Nerve_Tibial|NA	0	NA	NA|NA|NA	2	1	NA	NA	NA	1	NA	NA	NA	NA	1	1	1	1	NA	NA	NA	NA	NA	NA	NA
GABRG1	gamma-aminobutyric acid type A receptor subunit gamma1	2565	ENSG00000163285	HGNC:4086			04p12	protein-coding gene	Q8N1C3	4.8048e-05	8.4788e-06	8.4788e-06	1	1	Positional	94|NA|NA	0	NA	NA|NA|NA	0	NA	NA|NA|NA	1	Positional,eQTL	94|GTEx/v8/Nerve_Tibial|Mesendoderm	0	NA	NA|NA|NA	2	1	NA	NA	NA	NA	NA	NA	NA	NA	NA	NA	NA	NA	NA	NA	NA	NA	NA	NA	NA
GAK	cyclin G associated kinase	2580	ENSG00000178950	HGNC:4113	DNAJC26		04p16.3	protein-coding gene	O14976	0.055915	0.011994	0.011994	0	0	NA	NA|NA|NA	0	NA	NA|NA|NA	0	NA	NA|NA|NA	0	NA	NA|NA|NA	0	NA	NA|NA|NA	0	NA	1	NA	NA	NA	NA	NA	NA	NA	NA	NA	NA	NA	NA	NA	NA	NA	NA	NA	NA
GTF2H1	general transcription factor IIH subunit 1	2965	ENSG00000110768	HGNC:4655	BTF2|P62|TFIIH		11p15.1	protein-coding gene	P32780	0.43221	0.38098	0.38098	0	0	NA	NA|NA|NA	0	NA	NA|NA|NA	0	NA	NA|NA|NA	0	NA	NA|NA|NA	0	NA	NA|NA|NA	0	NA	NA	NA	NA	NA	NA	NA	NA	NA	NA	NA	NA	NA	NA	NA	NA	NA	NA	NA	NA
HCN1	hyperpolarization activated cyclic nucleotide gated potassium channel 1	348980	ENSG00000164588	HGNC:4845	BCNG-1|HAC-2	BCNG1	05p12	protein-coding gene	O60741	0.00060734	0.0010146	0.00060734	1	0	NA	NA|NA|NA	0	NA	NA|NA|NA	0	NA	NA|NA|NA	0	NA	NA|NA|NA	0	NA	NA|NA|NA	0	NA	1	1	1	NA	NA	NA	NA	NA	1	1	1	1	NA	NA	NA	NA	NA	NA	NA
HCN4	hyperpolarization activated cyclic nucleotide gated potassium channel 4	10021	ENSG00000138622	HGNC:16882			15q24.1	protein-coding gene	Q9Y3Q4	0.048118	0.060507	0.048118	0	0	NA	NA|NA|NA	0	NA	NA|NA|NA	0	NA	NA|NA|NA	1	CI	0|NA|Mesenchymal_Stem_Cell	1	CI	0|NA|Mesenchymal_Stem_Cell	2	1	NA	NA	NA	NA	NA	NA	NA	NA	NA	NA	NA	NA	NA	NA	NA	NA	NA	NA	NA
HDC	histidine decarboxylase	3067	ENSG00000140287	HGNC:4855			15q21.2	protein-coding gene	P19113	0.00059084	0.00022888	0.00022888	1	0	NA	NA|NA|NA	0	NA	NA|NA|NA	0	NA	NA|NA|NA	0	NA	NA|NA|NA	0	NA	NA|NA|NA	0	NA	NA	NA	NA	NA	NA	NA	NA	NA	NA	NA	NA	NA	NA	NA	1	NA	NA	NA	NA
HRH2	histamine receptor H2	3274	ENSG00000113749	HGNC:5183			05q35.2	protein-coding gene	P25021	0.26789	0.86134	0.26789	0	0	NA	NA|NA|NA	0	NA	NA|NA|NA	0	NA	NA|NA|NA	0	NA	NA|NA|NA	0	NA	NA|NA|NA	0	NA	NA	NA	NA	NA	NA	NA	NA	NA	NA	NA	NA	NA	NA	NA	NA	NA	NA	NA	NA
HSP90AA1	heat shock protein 90 alpha family class A member 1	3320	ENSG00000080824	HGNC:5253	Hsp89|Hsp90|FLJ31884|HSP90N	HSPC1|HSPCA	14q32.31	protein-coding gene	P07900	0.39008	0.28362	0.28362	0	0	NA	NA|NA|NA	0	NA	NA|NA|NA	0	NA	NA|NA|NA	0	NA	NA|NA|NA	0	NA	NA|NA|NA	0	NA	NA	NA	NA	NA	NA	NA	NA	NA	NA	NA	NA	NA	NA	NA	NA	NA	NA	NA	NA
IHO1	interactor of HORMAD1 1	339834	ENSG00000173421	HGNC:27945	FLJ25320|CT74|LELA1	CCDC36	03p21.31	protein-coding gene	Q8IYA8	0.032228	0.019745	0.019745	0	0	NA	NA|NA|NA	0	NA	NA|NA|NA	0	NA	NA|NA|NA	0	NA	NA|NA|NA	0	NA	NA|NA|NA	0	NA	1	NA	NA	NA	NA	1	1	NA	1	1	1	1	NA	NA	NA	NA	NA	NA	NA
IL17RB	interleukin 17 receptor B	55540	ENSG00000056736	HGNC:18015	IL17RH1|EVI27|CRL4	IL17BR	03p21.1	protein-coding gene	Q9NRM6	0.63891	0.40274	0.40274	0	0	NA	NA|NA|NA	0	NA	NA|NA|NA	0	NA	NA|NA|NA	1	CI	0|NA|IMR90	0	NA	NA|NA|NA	1	1	NA	NA	NA	NA	NA	NA	NA	NA	NA	NA	NA	NA	NA	NA	NA	NA	NA	NA	NA
INSYN1	inhibitory synaptic factor 1	388135	ENSG00000205363	HGNC:33753	MGC131524|LOC388135	C15orf59	15q24.1	protein-coding gene	Q2T9L4	0.0018039	0.0013258	0.0013258	0	1	Positional,eQTL	17|PsychENCODE_eQTLs:CMC_SVA_cis:CMC_NoSVA_cis|NA	1	Positional,eQTL	1|PsychENCODE_eQTLs:CMC_SVA_cis|NA	1	Positional,eQTL	1|PsychENCODE_eQTLs:CMC_SVA_cis|NA	1	Positional,eQTL	17|PsychENCODE_eQTLs:CMC_SVA_cis:CMC_NoSVA_cis:GTEx/v8/Artery_Coronary:GTEx/v8/Esophagus_Mucosa:GTEx/v8/Heart_Atrial_Appendage:GTEx/v8/Nerve_Tibial:GTEx/v8/Cells_Cultured_fibroblasts:GTEx/v8/Thyroid|NA	1	Positional,eQTL	1|PsychENCODE_eQTLs:CMC_SVA_cis:GTEx/v8/Heart_Atrial_Appendage:GTEx/v8/Nerve_Tibial|NA	4	1	NA	NA	NA	NA	NA	NA	NA	1	1	1	1	1	NA	NA	NA	NA	NA	NA	NA
IP6K2	inositol hexakisphosphate kinase 2	51447	ENSG00000068745	HGNC:17313		IHPK2	03p21.31	protein-coding gene	Q9UHH9	0.0013526	0.0038411	0.0013526	0	0	NA	NA|NA|NA	0	NA	NA|NA|NA	0	NA	NA|NA|NA	0	NA	NA|NA|NA	0	NA	NA|NA|NA	0	NA	NA	NA	NA	NA	NA	NA	NA	NA	NA	NA	NA	NA	1	NA	NA	NA	NA	NA	NA
KARS1	lysyl-tRNA synthetase 1	3735	ENSG00000065427	HGNC:6215	KARS2	DFNB89|KARS	16q23.1	protein-coding gene	Q15046	0.26122	0.22603	0.22603	0	0	NA	NA|NA|NA	0	NA	NA|NA|NA	0	NA	NA|NA|NA	1	CI	0|NA|IMR90:Mesenchymal_Stem_Cell:Mesendoderm:Trophoblast-like_Cell:hESC	0	NA	NA|NA|NA	1	1	NA	NA	NA	NA	NA	NA	NA	NA	NA	NA	NA	NA	NA	NA	NA	NA	NA	NA	NA
KCNH3	potassium voltage-gated channel subfamily H member 3	23416	ENSG00000135519	HGNC:6252	Kv12.2|BEC1|elk2		12q13.12	protein-coding gene	Q9ULD8	0.0056069	0.00049508	0.00049508	1	1	CI	0|NA|Promoter_anchored_loops	1	CI	0|NA|Promoter_anchored_loops	1	CI	0|NA|Promoter_anchored_loops	1	eQTL,CI	0|eQTLGen_cis_eQTLs|Promoter_anchored_loops:Spleen:IMR90:Mesenchymal_Stem_Cell	1	eQTL,CI	0|eQTLGen_cis_eQTLs|Promoter_anchored_loops:Spleen:IMR90:Mesenchymal_Stem_Cell	4	1	NA	NA	NA	NA	1	NA	NA	NA	1	1	1	1	NA	NA	NA	NA	NA	NA	NA
KCNH5	potassium voltage-gated channel subfamily H member 5	27133	ENSG00000140015	HGNC:6254	Kv10.2|H-EAG2|eag2|hEAG2		14q23.2	protein-coding gene	Q8NCM2	0.36495	0.52426	0.36495	0	0	NA	NA|NA|NA	0	NA	NA|NA|NA	0	NA	NA|NA|NA	0	NA	NA|NA|NA	0	NA	NA|NA|NA	0	NA	NA	NA	NA	NA	NA	NA	NA	NA	NA	NA	NA	NA	NA	NA	NA	NA	NA	NA	NA
KDM5B	lysine demethylase 5B	10765	ENSG00000117139	HGNC:18039	RBBP2H1A|PLU-1|CT31|PPP1R98	JARID1B	01q32.1	protein-coding gene	Q9UGL1	0.34046	0.35943	0.34046	0	0	NA	NA|NA|NA	0	NA	NA|NA|NA	0	NA	NA|NA|NA	0	NA	NA|NA|NA	0	NA	NA|NA|NA	0	NA	NA	NA	NA	NA	NA	NA	NA	NA	NA	NA	NA	NA	NA	NA	NA	NA	0	1	NA
KLHL5	kelch like family member 5	51088	ENSG00000109790	HGNC:6356			04p14	protein-coding gene	Q96PQ7	0.0063352	0.013973	0.0063352	0	0	NA	NA|NA|NA	0	NA	NA|NA|NA	0	NA	NA|NA|NA	0	NA	NA|NA|NA	0	NA	NA|NA|NA	0	NA	NA	NA	NA	NA	NA	NA	NA	NA	NA	NA	NA	NA	1	NA	NA	NA	NA	NA	NA
KMT2C	lysine methyltransferase 2C	58508	ENSG00000055609	HGNC:13726	KIAA1506|HALR	MLL3	07q36.1	protein-coding gene	Q8NEZ4	0.32855	0.31745	0.31745	0	0	NA	NA|NA|NA	0	NA	NA|NA|NA	0	NA	NA|NA|NA	0	NA	NA|NA|NA	0	NA	NA|NA|NA	0	NA	NA	NA	NA	NA	NA	NA	NA	NA	NA	NA	NA	NA	NA	NA	NA	NA	NA	NA	NA
L3MBTL2	L3MBTL histone methyl-lysine binding protein 2	83746	ENSG00000100395	HGNC:18594	H-l(3)mbt-l|DKFZP761I141|dJ756G23.3		22q13.2	protein-coding gene	Q969R5	0.0087485	0.00098396	0.00098396	1	1	Positional,eQTL	15|GTEx/v8/Brain_Caudate_basal_ganglia:GTEx/v8/Brain_Nucleus_accumbens_basal_ganglia|NA	1	Positional,eQTL	1|GTEx/v8/Brain_Caudate_basal_ganglia:GTEx/v8/Brain_Nucleus_accumbens_basal_ganglia|NA	1	Positional,eQTL	1|GTEx/v8/Brain_Caudate_basal_ganglia:GTEx/v8/Brain_Nucleus_accumbens_basal_ganglia|NA	1	Positional,eQTL	15|eQTLcatalogue/Fairfax_2012_B-cell_CD19:eQTLcatalogue/Fairfax_2014_IFN24:eQTLcatalogue/Fairfax_2014_naive:eQTLcatalogue/GENCORD_ge_LCL:eQTLcatalogue/GENCORD_ge_T-cell:eQTLcatalogue/GEUVADIS_ge_LCL:eQTLcatalogue/Kasela_2017_T-cell_CD4:eQTLcatalogue/Kasela_2017_T-cell_CD8:eQTLcatalogue/Quach_2016_ge_monocyte_IAV:eQTLcatalogue/TwinsUK_ge_LCL:eQTLGen_cis_eQTLs:BIOSQTL/BIOS_eQTL_geneLevel:GTEx/v8/Ce…	1	Positional,eQTL	1|eQTLcatalogue/Fairfax_2012_B-cell_CD19:eQTLcatalogue/Fairfax_2014_IFN24:eQTLcatalogue/Fairfax_2014_naive:eQTLcatalogue/GENCORD_ge_LCL:eQTLcatalogue/GEUVADIS_ge_LCL:eQTLcatalogue/Kasela_2017_T-cell_CD4:eQTLcatalogue/Kasela_2017_T-cell_CD8:eQTLcatalogue/TwinsUK_ge_LCL:eQTLGen_cis_eQTLs:BIOSQTL/BIOS_eQTL_geneLevel:GTEx/v8/Cells_EBV-transformed_lymphocytes:GTEx/v8/Artery_Aorta:GTEx/v8/Artery_Tibial…	4	1	1	1	1	1	NA	NA	NA	NA	2	1	2	1	NA	NA	NA	NA	NA	NA	NA
LAMA5	laminin subunit alpha 5	3911	ENSG00000130702	HGNC:6485			20q13.33	protein-coding gene	O15230	0.00042215	0.00027977	0.00027977	1	0	NA	NA|NA|NA	0	NA	NA|NA|NA	0	NA	NA|NA|NA	0	NA	NA|NA|NA	0	NA	NA|NA|NA	0	NA	1	NA	NA	NA	NA	NA	NA	NA	NA	NA	NA	NA	NA	NA	NA	NA	NA	NA	NA
LAPTM5	lysosomal protein transmembrane 5	7805	ENSG00000162511	HGNC:29612			01p35.2	protein-coding gene	Q13571	0.21858	0.13727	0.13727	0	0	NA	NA|NA|NA	0	NA	NA|NA|NA	0	NA	NA|NA|NA	1	CI	0|NA|Adult_Cortex:Left_Ventricle:IMR90:Mesenchymal_Stem_Cell:Mesendoderm:Neural_Progenitor_Cell:Trophoblast-like_Cell:hESC	0	NA	NA|NA|NA	1	1	NA	NA	NA	NA	NA	NA	NA	NA	NA	NA	NA	NA	NA	NA	NA	NA	NA	NA	NA
LMBR1L	limb development membrane protein 1 like	55716	ENSG00000139636	HGNC:18268	FLJ10494|KIAA1174		12q13.12	protein-coding gene	Q6UX01	0.22093	0.19057	0.19057	0	0	NA	NA|NA|NA	0	NA	NA|NA|NA	0	NA	NA|NA|NA	1	eQTL	0|GTEx/v8/Adipose_Subcutaneous:GTEx/v8/Pancreas|NA	1	eQTL	0|GTEx/v8/Pancreas|NA	2	1	1	NA	NA	NA	NA	NA	NA	NA	NA	NA	NA	NA	NA	NA	NA	NA	NA	NA	NA
LMO3	LIM domain only 3	55885	ENSG00000048540	HGNC:6643	Rhom-3|DAT1	RBTNL2	12p12.3	protein-coding gene	Q8TAP4	0.00017754	0.0062361	0.00017754	1	1	Positional	12|NA|NA	1	Positional	2|NA|NA	1	Positional	2|NA|NA	1	Positional,eQTL	12|GTEx/v8/Adipose_Subcutaneous:GTEx/v8/Adipose_Visceral_Omentum:GTEx/v8/Nerve_Tibial|NA	1	Positional,eQTL	2|GTEx/v8/Adipose_Subcutaneous:GTEx/v8/Adipose_Visceral_Omentum:GTEx/v8/Nerve_Tibial|NA	4	1	NA	NA	NA	NA	NA	NA	NA	1	1	1	1	1	NA	NA	NA	NA	NA	NA	NA
MDH1	malate dehydrogenase 1	4190	ENSG00000014641	HGNC:6970			02p15	protein-coding gene	P40925	0.03756	0.023554	0.023554	0	0	NA	NA|NA|NA	0	NA	NA|NA|NA	0	NA	NA|NA|NA	0	NA	NA|NA|NA	0	NA	NA|NA|NA	0	NA	NA	NA	NA	NA	NA	1	1	NA	1	1	1	1	NA	NA	NA	NA	NA	NA	NA
MEX3B	mex-3 RNA binding family member B	84206	ENSG00000183496	HGNC:25297	DKFZp434J0617|RNF195	RKHD3	15q25.2	protein-coding gene	Q6ZN04	0.8142	0.32542	0.32542	0	0	NA	NA|NA|NA	0	NA	NA|NA|NA	0	NA	NA|NA|NA	1	eQTL,CI	0|GTEx/v8/Cells_Cultured_fibroblasts|Fetal_Cortex:Aorta:Left_Ventricle:IMR90:Mesenchymal_Stem_Cell:Mesendoderm:Trophoblast-like_Cell:hESC	1	eQTL	0|GTEx/v8/Cells_Cultured_fibroblasts|NA	2	1	NA	NA	NA	NA	NA	NA	NA	NA	NA	NA	NA	NA	NA	NA	NA	NA	NA	NA	NA
MGST1	microsomal glutathione S-transferase 1	4257	ENSG00000008394	HGNC:7061	MGST-I	GST12	12p12.3	protein-coding gene	P10620	0.94987	0.91104	0.91104	0	1	Positional	12|NA|NA	1	Positional	2|NA|NA	1	Positional	2|NA|NA	1	Positional	12|NA|NA	1	Positional	2|NA|NA	4	1	NA	NA	NA	NA	NA	NA	NA	1	1	1	1	1	NA	NA	NA	NA	NA	NA	NA
MPHOSPH9	M-phase phosphoprotein 9	10198	ENSG00000051825	HGNC:7215	MPP9		12q24.31	protein-coding gene	Q99550	8.8848e-05	0.00035489	8.8848e-05	1	0	NA	NA|NA|NA	0	NA	NA|NA|NA	0	NA	NA|NA|NA	0	NA	NA|NA|NA	0	NA	NA|NA|NA	0	NA	1	NA	NA	NA	NA	NA	NA	NA	NA	NA	NA	NA	NA	NA	NA	NA	NA	NA	NA
MPRIP	myosin phosphatase Rho interacting protein	23164	ENSG00000133030	HGNC:30321	RHOIP3|M-RIP|p116Rip		17p11.2	protein-coding gene	Q6WCQ1	0.99285	0.99976	0.99285	0	0	NA	NA|NA|NA	0	NA	NA|NA|NA	0	NA	NA|NA|NA	0	NA	NA|NA|NA	0	NA	NA|NA|NA	0	NA	NA	NA	NA	NA	NA	NA	NA	NA	NA	NA	NA	NA	NA	NA	NA	NA	NA	NA	NA
MRM1	mitochondrial rRNA methyltransferase 1	79922	ENSG00000278619	HGNC:26202	FLJ22578		17q12	protein-coding gene	Q6IN84	0.00010175	5.2388e-05	5.2388e-05	1	0	NA	NA|NA|NA	0	NA	NA|NA|NA	0	NA	NA|NA|NA	0	NA	NA|NA|NA	0	NA	NA|NA|NA	0	NA	NA	NA	NA	NA	NA	NA	NA	NA	NA	NA	NA	NA	1	NA	NA	NA	NA	NA	NA
MRPL3	mitochondrial ribosomal protein L3	11222	ENSG00000114686	HGNC:10379	MRL3	RPML3	03q22.1	protein-coding gene	P09001	0.95451	0.048294	0.048294	0	0	NA	NA|NA|NA	0	NA	NA|NA|NA	0	NA	NA|NA|NA	0	NA	NA|NA|NA	0	NA	NA|NA|NA	0	NA	NA	NA	NA	NA	NA	NA	NA	NA	NA	NA	NA	NA	NA	NA	NA	1	NA	NA	NA
MYO19	myosin XIX	80179	ENSG00000278259	HGNC:26234	FLJ22865	MYOHD1	17q12	protein-coding gene	Q96H55	0.0087663	0.00047854	0.00047854	1	0	NA	NA|NA|NA	0	NA	NA|NA|NA	0	NA	NA|NA|NA	0	NA	NA|NA|NA	0	NA	NA|NA|NA	0	NA	1	NA	NA	NA	1	NA	NA	NA	1	1	1	1	NA	NA	NA	NA	NA	NA	NA
MYT1L	myelin transcription factor 1 like	23040	ENSG00000186487	HGNC:7623	KIAA1106|NZF1|ZC2HC4B|ZC2H2C2		02p25.3	protein-coding gene	Q9UL68	0.00036027	0.0012527	0.00036027	1	0	NA	NA|NA|NA	0	NA	NA|NA|NA	0	NA	NA|NA|NA	0	NA	NA|NA|NA	0	NA	NA|NA|NA	0	NA	NA	NA	NA	NA	NA	NA	NA	NA	NA	NA	NA	NA	1	NA	NA	NA	NA	NA	NA
NCKAP5L	NCK associated protein 5 like	57701	ENSG00000167566	HGNC:29321		KIAA1602	12q13.12	protein-coding gene	Q9HCH0	0.020987	0.0012067	0.0012067	0	1	CI	0|NA|Adult_Cortex	0	NA	NA|NA|NA	0	NA	NA|NA|NA	1	eQTL,CI	0|GTEx/v8/Whole_Blood:GTEx/v8/Nerve_Tibial|Adult_Cortex	1	eQTL	0|GTEx/v8/Whole_Blood:GTEx/v8/Nerve_Tibial|NA	3	1	NA	NA	NA	NA	NA	NA	NA	NA	NA	NA	NA	NA	NA	NA	NA	NA	NA	NA	NA
NCKIPSD	NCK interacting protein with SH3 domain	51517	ENSG00000213672	HGNC:15486	AF3P21|SPIN90|ORF1|WISH|WASLBP|DIP1		03p21.31	protein-coding gene	Q9NZQ3	0.0053076	0.0044863	0.0044863	0	0	NA	NA|NA|NA	0	NA	NA|NA|NA	0	NA	NA|NA|NA	0	NA	NA|NA|NA	0	NA	NA|NA|NA	0	NA	NA	NA	NA	NA	NA	NA	NA	NA	NA	NA	NA	NA	1	NA	NA	NA	NA	NA	NA
NCL	nucleolin	4691	ENSG00000115053	HGNC:7667	C23|Nsr1		02q37.1	protein-coding gene	P19338	0.46374	0.32923	0.32923	0	0	NA	NA|NA|NA	0	NA	NA|NA|NA	0	NA	NA|NA|NA	0	NA	NA|NA|NA	0	NA	NA|NA|NA	0	NA	NA	NA	NA	NA	NA	NA	NA	NA	NA	NA	NA	NA	NA	NA	NA	NA	NA	NA	NA
NDUFA13	NADH:ubiquinone oxidoreductase subunit A13	51079	ENSG00000186010	HGNC:17194	CGI-39|CDA016|GRIM-19|GRIM19|B16.6		19p13.11	protein-coding gene	Q9P0J0	0.042547	0.026007	0.026007	0	0	NA	NA|NA|NA	0	NA	NA|NA|NA	0	NA	NA|NA|NA	0	NA	NA|NA|NA	0	NA	NA|NA|NA	0	NA	NA	NA	NA	NA	1	NA	NA	NA	1	1	1	1	NA	NA	NA	NA	NA	NA	NA
NDUFA4	NDUFA4 mitochondrial complex associated	4697	ENSG00000189043	HGNC:7687	MLRQ|CI-9k|COXFA4|MRCAF1|MISTR1		07p21.3	protein-coding gene	O00483	0.80308	0.67323	0.67323	0	0	NA	NA|NA|NA	0	NA	NA|NA|NA	0	NA	NA|NA|NA	1	CI	0|NA|Mesenchymal_Stem_Cell:Mesendoderm:hESC	0	NA	NA|NA|NA	1	1	NA	NA	NA	NA	NA	NA	NA	NA	NA	NA	NA	NA	NA	NA	NA	NA	NA	NA	NA
NINL	ninein like	22981	ENSG00000101004	HGNC:29163	KIAA0980|NLP		20p11.21	protein-coding gene	Q9Y2I6	0.12839	0.15119	0.12839	0	0	NA	NA|NA|NA	0	NA	NA|NA|NA	0	NA	NA|NA|NA	0	NA	NA|NA|NA	0	NA	NA|NA|NA	0	NA	NA	NA	NA	NA	NA	NA	NA	NA	NA	NA	NA	NA	NA	NA	NA	NA	NA	NA	NA
NIPBL	NIPBL cohesin loading factor	25836	ENSG00000164190	HGNC:28862	IDN3|DKFZp434L1319|FLJ11203|FLJ12597|FLJ13354|FLJ13648|Scc2		05p13.2	protein-coding gene	Q6KC79	0.99136	0.98353	0.98353	0	0	NA	NA|NA|NA	0	NA	NA|NA|NA	0	NA	NA|NA|NA	0	NA	NA|NA|NA	0	NA	NA|NA|NA	0	NA	NA	NA	NA	NA	NA	NA	NA	NA	NA	NA	NA	NA	NA	NA	NA	NA	1	1	NA
NLGN4X	neuroligin 4 X-linked	57502	ENSG00000146938	HGNC:14287	KIAA1260|NLGN|HLNX	NLGN4	Xp22.32-p22.31	protein-coding gene	Q8N0W4	NA	NA	NA	NA	0	NA	NA|NA|NA	0	NA	NA|NA|NA	0	NA	NA|NA|NA	0	NA	NA|NA|NA	0	NA	NA|NA|NA	0	NA	NA	NA	NA	NA	NA	NA	NA	NA	NA	NA	NA	NA	NA	NA	NA	NA	NA	NA	NA
NOP14	NOP14 nucleolar protein	8602	ENSG00000087269	HGNC:16821	RES4-25|UTP2	C4orf9|NOL14	04p16.3	protein-coding gene	P78316	0.50174	0.36099	0.36099	0	1	CI	0|NA|Promoter_anchored_loops	0	NA	NA|NA|NA	0	NA	NA|NA|NA	1	CI	0|NA|Promoter_anchored_loops	0	NA	NA|NA|NA	2	1	NA	NA	NA	NA	NA	NA	NA	NA	NA	NA	NA	NA	NA	NA	NA	NA	NA	NA	NA
NPAS3	neuronal PAS domain protein 3	64067	ENSG00000151322	HGNC:19311	MOP6|PASD6|bHLHe12		14q13.1	protein-coding gene	Q8IXF0	0.4341	0.57155	0.4341	0	0	NA	NA|NA|NA	0	NA	NA|NA|NA	0	NA	NA|NA|NA	0	NA	NA|NA|NA	0	NA	NA|NA|NA	0	NA	NA	1	1	NA	NA	1	1	NA	2	1	2	1	NA	NA	NA	NA	NA	NA	NA
NR4A2	nuclear receptor subfamily 4 group A member 2	4929	ENSG00000153234	HGNC:7981	TINUR|NOT|RNR1|HZF-3	NURR1	02q22-q23	protein-coding gene	P43354	0.092069	0.014913	0.014913	0	0	NA	NA|NA|NA	0	NA	NA|NA|NA	0	NA	NA|NA|NA	0	NA	NA|NA|NA	0	NA	NA|NA|NA	0	NA	NA	1	1	NA	NA	NA	NA	NA	1	1	1	1	NA	NA	NA	NA	NA	NA	NA
NRXN1	neurexin 1	9378	ENSG00000179915	HGNC:8008	KIAA0578|Hs.22998		02p16.3	protein-coding gene	P58400|Q9ULB1	0.84875	0.86412	0.84875	0	0	NA	NA|NA|NA	0	NA	NA|NA|NA	0	NA	NA|NA|NA	0	NA	NA|NA|NA	0	NA	NA|NA|NA	0	NA	NA	NA	NA	NA	NA	NA	NA	NA	NA	NA	NA	NA	NA	NA	NA	NA	NA	NA	NA
NSD1	nuclear receptor binding SET domain protein 1	64324	ENSG00000165671	HGNC:14234	ARA267|FLJ22263|KMT3B	STO	05q35.3	protein-coding gene	Q96L73	0.10854	0.044904	0.044904	0	0	NA	NA|NA|NA	0	NA	NA|NA|NA	0	NA	NA|NA|NA	0	NA	NA|NA|NA	0	NA	NA|NA|NA	0	NA	NA	NA	NA	NA	NA	NA	NA	NA	NA	NA	NA	NA	NA	NA	NA	NA	NA	NA	NA
NSF	N-ethylmaleimide sensitive factor, vesicle fusing ATPase	4905	ENSG00000073969	HGNC:8016	SKD2|SEC18		17q21.31	protein-coding gene	P46459	0.017222	0.0046945	0.0046945	0	0	NA	NA|NA|NA	0	NA	NA|NA|NA	0	NA	NA|NA|NA	0	NA	NA|NA|NA	0	NA	NA|NA|NA	0	NA	1	NA	NA	NA	NA	NA	NA	NA	NA	NA	NA	NA	NA	NA	NA	NA	NA	NA	NA
NUBPL	NUBP iron-sulfur cluster assembly factor, mitochondrial	80224	ENSG00000151413	HGNC:20278	FLJ12660|IND1|huInd1	C14orf127	14q12	protein-coding gene	Q8TB37	0.1418	0.15758	0.1418	0	0	NA	NA|NA|NA	0	NA	NA|NA|NA	0	NA	NA|NA|NA	0	NA	NA|NA|NA	0	NA	NA|NA|NA	0	NA	1	NA	NA	NA	1	NA	NA	NA	1	1	1	1	NA	NA	NA	NA	NA	NA	NA
NUTF2	nuclear transport factor 2	10204	ENSG00000102898	HGNC:13722	NTF2|PP15		16q22.1	protein-coding gene	P61970	0.0043937	0.0053245	0.0043937	0	0	NA	NA|NA|NA	0	NA	NA|NA|NA	0	NA	NA|NA|NA	0	NA	NA|NA|NA	0	NA	NA|NA|NA	0	NA	NA	NA	NA	1	NA	NA	NA	NA	1	1	1	1	NA	NA	NA	NA	NA	NA	NA
OPRK1	opioid receptor kappa 1	4986	ENSG00000082556	HGNC:8154	KOR|OPRK		08q11.23	protein-coding gene	P41145	0.21212	0.47157	0.21212	0	0	NA	NA|NA|NA	0	NA	NA|NA|NA	0	NA	NA|NA|NA	0	NA	NA|NA|NA	0	NA	NA|NA|NA	0	NA	NA	NA	NA	NA	NA	NA	NA	NA	NA	NA	NA	NA	NA	NA	NA	NA	NA	NA	NA
OPRM1	opioid receptor mu 1	4988	ENSG00000112038	HGNC:8156	MOR1		06q25.2	protein-coding gene	P35372	0.98363	0.99691	0.98363	0	0	NA	NA|NA|NA	0	NA	NA|NA|NA	0	NA	NA|NA|NA	0	NA	NA|NA|NA	0	NA	NA|NA|NA	0	NA	NA	NA	NA	NA	NA	NA	NA	NA	NA	NA	NA	NA	NA	NA	NA	NA	NA	NA	NA
PAM	peptidylglycine alpha-amidating monooxygenase	5066	ENSG00000145730	HGNC:8596	PAL|PHM		05q21.1	protein-coding gene	P19021	0.099789	0.010443	0.010443	0	0	NA	NA|NA|NA	0	NA	NA|NA|NA	0	NA	NA|NA|NA	0	NA	NA|NA|NA	0	NA	NA|NA|NA	0	NA	1	NA	NA	NA	NA	NA	NA	NA	NA	NA	NA	NA	1	NA	NA	NA	NA	NA	NA
PAN3	poly(A) specific ribonuclease subunit PAN3	255967	ENSG00000152520	HGNC:29991			13q12.2	protein-coding gene	Q58A45	0.051501	0.00015445	0.00015445	1	0	NA	NA|NA|NA	0	NA	NA|NA|NA	0	NA	NA|NA|NA	1	CI	0|NA|EP_correlation_cell_type_oneway	0	NA	NA|NA|NA	1	1	NA	NA	NA	NA	NA	NA	NA	NA	NA	NA	NA	NA	NA	NA	NA	NA	NA	NA	NA
PCDH7	protocadherin 7	5099	ENSG00000169851	HGNC:8659	BH-Pcdh|PPP1R120		04p15.1	protein-coding gene	O60245	0.00044004	0.00040508	0.00040508	1	0	NA	NA|NA|NA	0	NA	NA|NA|NA	0	NA	NA|NA|NA	0	NA	NA|NA|NA	0	NA	NA|NA|NA	0	NA	NA	NA	NA	NA	NA	NA	NA	NA	NA	NA	NA	NA	1	NA	NA	NA	NA	NA	NA
PCM1	pericentriolar material 1	5108	ENSG00000078674	HGNC:8727	PTC4		08p22	protein-coding gene	Q15154	0.14078	0.54829	0.14078	0	0	NA	NA|NA|NA	0	NA	NA|NA|NA	0	NA	NA|NA|NA	0	NA	NA|NA|NA	0	NA	NA|NA|NA	0	NA	NA	NA	NA	NA	NA	NA	NA	NA	NA	NA	NA	NA	NA	NA	NA	NA	NA	NA	NA
PDLIM7	PDZ and LIM domain 7	9260	ENSG00000196923	HGNC:22958	ENIGMA		05q35.3	protein-coding gene	Q9NR12	NA	0.0013445	0.0013445	0	0	NA	NA|NA|NA	0	NA	NA|NA|NA	0	NA	NA|NA|NA	0	NA	NA|NA|NA	0	NA	NA|NA|NA	0	NA	NA	NA	NA	NA	NA	NA	NA	NA	NA	NA	NA	NA	NA	NA	NA	NA	NA	NA	NA
PDZK1	PDZ domain containing 1	5174	ENSG00000174827	HGNC:8821	PDZD1|NHERF3		01q21.1	protein-coding gene	Q5T2W1	0.11713	0.00075274	0.00075274	1	0	NA	NA|NA|NA	0	NA	NA|NA|NA	0	NA	NA|NA|NA	0	NA	NA|NA|NA	0	NA	NA|NA|NA	0	NA	1	NA	NA	NA	NA	NA	NA	NA	NA	NA	NA	NA	NA	NA	NA	NA	NA	NA	NA
PFKM	phosphofructokinase, muscle	5213	ENSG00000152556	HGNC:8877	PFK-1|PPP1R122	PFKX	12q13.11	protein-coding gene	P08237	0.00026634	0.0067256	0.00026634	1	0	NA	NA|NA|NA	0	NA	NA|NA|NA	0	NA	NA|NA|NA	0	NA	NA|NA|NA	0	NA	NA|NA|NA	0	NA	1	NA	NA	NA	NA	NA	NA	NA	NA	NA	NA	NA	1	NA	NA	NA	NA	NA	NA
PHC3	polyhomeotic homolog 3	80012	ENSG00000173889	HGNC:15682	EDR3|FLJ12967|FLJ12729|HPH3		03q26.2	protein-coding gene	Q8NDX5	0.15789	0.082654	0.082654	0	0	NA	NA|NA|NA	0	NA	NA|NA|NA	0	NA	NA|NA|NA	0	NA	NA|NA|NA	0	NA	NA|NA|NA	0	NA	NA	NA	NA	NA	NA	NA	NA	NA	NA	NA	NA	NA	NA	NA	NA	NA	NA	NA	NA
PHF14	PHD finger protein 14	9678	ENSG00000106443	HGNC:22203	KIAA0783		07p21.3	protein-coding gene	O94880	0.91236	0.26573	0.26573	0	0	NA	NA|NA|NA	0	NA	NA|NA|NA	0	NA	NA|NA|NA	1	CI	0|NA|hESC	0	NA	NA|NA|NA	1	1	NA	NA	NA	NA	NA	NA	NA	NA	NA	NA	NA	NA	NA	NA	NA	NA	NA	NA	NA
PHF3	PHD finger protein 3	23469	ENSG00000118482	HGNC:8921			06q12	protein-coding gene	Q92576	0.047376	0.10349	0.047376	0	0	NA	NA|NA|NA	0	NA	NA|NA|NA	0	NA	NA|NA|NA	0	NA	NA|NA|NA	0	NA	NA|NA|NA	0	NA	NA	NA	NA	NA	1	NA	NA	NA	1	1	1	1	NA	NA	NA	NA	NA	NA	NA
PIGW	phosphatidylinositol glycan anchor biosynthesis class W	284098	ENSG00000277161	HGNC:23213	Gwt1|FLJ37433		17q12	protein-coding gene	Q7Z7B1	0.0039884	0.00038262	0.00038262	1	0	NA	NA|NA|NA	0	NA	NA|NA|NA	0	NA	NA|NA|NA	0	NA	NA|NA|NA	0	NA	NA|NA|NA	0	NA	1	NA	NA	NA	NA	NA	NA	NA	NA	NA	NA	NA	NA	NA	NA	NA	NA	NA	NA
PIKFYVE	phosphoinositide kinase, FYVE-type zinc finger containing	200576	ENSG00000115020	HGNC:23785	MGC40423|KIAA0981|PIP5K|p235|ZFYVE29|FAB1	PIP5K3	02q34	protein-coding gene	Q9Y2I7	0.009492	0.011752	0.009492	0	0	NA	NA|NA|NA	0	NA	NA|NA|NA	0	NA	NA|NA|NA	0	NA	NA|NA|NA	0	NA	NA|NA|NA	0	NA	1	NA	NA	NA	NA	NA	NA	NA	NA	NA	NA	NA	NA	NA	NA	NA	NA	NA	NA
PIM1	Pim-1 proto-oncogene, serine/threonine kinase	5292	ENSG00000137193	HGNC:8986		PIM	06p21.2	protein-coding gene	P11309	0.0045087	0.20298	0.0045087	0	1	CI	0|NA|Adult_Cortex:Fetal_Cortex	0	NA	NA|NA|NA	0	NA	NA|NA|NA	1	CI	0|NA|Adult_Cortex:Fetal_Cortex:IMR90	0	NA	NA|NA|NA	2	1	1	NA	NA	NA	NA	NA	NA	NA	NA	NA	NA	NA	NA	NA	NA	NA	NA	NA	NA
PITPNM2	phosphatidylinositol transfer protein membrane associated 2	57605	ENSG00000090975	HGNC:21044	RDGBA2|RDGB2|NIR3		12q24.31	protein-coding gene	Q9BZ72	0.00025213	0.00012672	0.00012672	1	0	NA	NA|NA|NA	0	NA	NA|NA|NA	0	NA	NA|NA|NA	0	NA	NA|NA|NA	0	NA	NA|NA|NA	0	NA	1	NA	NA	NA	1	NA	NA	1	2	1	2	1	NA	NA	NA	NA	NA	NA	NA
PKP4	plakophilin 4	8502	ENSG00000144283	HGNC:9026	p0071		02q24.1	protein-coding gene	Q99569	0.023848	0.008916	0.008916	0	0	NA	NA|NA|NA	0	NA	NA|NA|NA	0	NA	NA|NA|NA	0	NA	NA|NA|NA	0	NA	NA|NA|NA	0	NA	NA	NA	NA	NA	NA	1	1	NA	1	1	1	1	NA	NA	NA	NA	NA	NA	NA
PLCH1	phospholipase C eta 1	23007	ENSG00000114805	HGNC:29185	KIAA1069|MGC117152|DKFZp434C1372|PLCeta1	PLCL3	03q25.31	protein-coding gene	Q4KWH8	0.0005148	0.00042652	0.00042652	1	0	NA	NA|NA|NA	0	NA	NA|NA|NA	0	NA	NA|NA|NA	0	NA	NA|NA|NA	0	NA	NA|NA|NA	0	NA	NA	NA	NA	NA	NA	NA	NA	NA	NA	NA	NA	NA	NA	NA	NA	NA	NA	NA	NA
PNKD	PNKD metallo-beta-lactamase domain containing	25953	ENSG00000127838	HGNC:9153	DYT8|PDC|DKFZp564N1362|FPD1|MR-1|BRP17|FKSG19|TAHCCP2|KIAA1184|KIPP1184|MGC31943|PKND1|MR-1S		02q35	protein-coding gene	Q8N490	0.70486	0.79306	0.70486	0	0	NA	NA|NA|NA	0	NA	NA|NA|NA	0	NA	NA|NA|NA	0	NA	NA|NA|NA	0	NA	NA|NA|NA	0	NA	NA	NA	NA	NA	NA	NA	NA	NA	NA	NA	NA	NA	NA	NA	NA	NA	NA	NA	NA
POFUT1	protein O-fucosyltransferase 1	23509	ENSG00000101346	HGNC:14988	O-FUT|O-Fuc-T|KIAA0180|FUT12		20q11.21	protein-coding gene	Q9H488	0.35777	0.34476	0.34476	0	0	NA	NA|NA|NA	0	NA	NA|NA|NA	0	NA	NA|NA|NA	0	NA	NA|NA|NA	0	NA	NA|NA|NA	0	NA	NA	NA	NA	NA	NA	NA	NA	NA	NA	NA	NA	NA	NA	NA	NA	NA	NA	NA	NA
POLR3H	RNA polymerase III subunit H	171568	ENSG00000100413	HGNC:30349	RPC8|KIAA1665|C25		22q13.2	protein-coding gene	Q9Y535	0.037942	0.044526	0.037942	0	1	eQTL	0|PsychENCODE_eQTLs:CMC_SVA_cis|NA	1	eQTL	0|CMC_SVA_cis|NA	1	eQTL	0|CMC_SVA_cis|NA	1	eQTL	0|PsychENCODE_eQTLs:CMC_SVA_cis:GTEx/v8/Esophagus_Mucosa:GTEx/v8/Testis|NA	1	eQTL	0|CMC_SVA_cis|NA	4	1	1	NA	NA	NA	NA	NA	NA	NA	NA	NA	NA	NA	NA	NA	NA	NA	NA	NA	NA
POSTN	periostin	10631	ENSG00000133110	HGNC:16953	OSF-2|PN|periostin		13q13.3	protein-coding gene	Q15063	0.0068968	0.00049279	0.00049279	1	0	NA	NA|NA|NA	0	NA	NA|NA|NA	0	NA	NA|NA|NA	0	NA	NA|NA|NA	0	NA	NA|NA|NA	0	NA	1	NA	NA	NA	NA	NA	NA	NA	NA	NA	NA	NA	NA	NA	NA	NA	NA	NA	NA
POU3F2	POU class 3 homeobox 2	5454	ENSG00000184486	HGNC:9215	POUF3|BRN2|OCT7	OTF7	06q16.1	protein-coding gene	P20265	0.46717	0.44554	0.44554	0	0	NA	NA|NA|NA	0	NA	NA|NA|NA	0	NA	NA|NA|NA	1	CI	0|NA|Mesenchymal_Stem_Cell:Mesendoderm:Trophoblast-like_Cell:hESC	1	CI	0|NA|Mesendoderm:hESC	2	1	NA	NA	NA	NA	1	NA	NA	NA	1	1	1	1	NA	NA	NA	NA	NA	NA	NA
PPP1R3A	protein phosphatase 1 regulatory subunit 3A	5506	ENSG00000154415	HGNC:9291	GM	PPP1R3	07q31.1	protein-coding gene	Q16821	0.0020411	0.000268	0.000268	1	0	NA	NA|NA|NA	0	NA	NA|NA|NA	0	NA	NA|NA|NA	0	NA	NA|NA|NA	0	NA	NA|NA|NA	0	NA	NA	NA	NA	NA	NA	NA	NA	NA	NA	NA	NA	NA	1	NA	NA	NA	NA	NA	NA
PPP2R2B	protein phosphatase 2 regulatory subunit Bbeta	5521	ENSG00000156475	HGNC:9305	PR55-BETA|PR52B|B55beta	SCA12	05q32	protein-coding gene	Q00005	0.0027923	0.0038244	0.0027923	0	0	NA	NA|NA|NA	0	NA	NA|NA|NA	0	NA	NA|NA|NA	0	NA	NA|NA|NA	0	NA	NA|NA|NA	0	NA	NA	1	1	NA	NA	NA	NA	NA	1	1	1	1	NA	NA	NA	NA	NA	NA	NA
PRKAR2A	protein kinase cAMP-dependent type II regulatory subunit alpha	5576	ENSG00000114302	HGNC:9391		PRKAR2	03p21.31	protein-coding gene	P13861	0.015335	0.0049732	0.0049732	0	0	NA	NA|NA|NA	0	NA	NA|NA|NA	0	NA	NA|NA|NA	0	NA	NA|NA|NA	0	NA	NA|NA|NA	0	NA	NA	NA	NA	NA	NA	NA	NA	NA	NA	NA	NA	NA	1	NA	NA	NA	NA	NA	NA
PRPH	peripherin	5630	ENSG00000135406	HGNC:9461	PRPH1	NEF4	12q13.12	protein-coding gene	P41219	0.029313	2.6538e-05	2.6538e-05	1	1	Positional,eQTL	37|GTEx/v8/Brain_Spinal_cord_cervical_c-1|NA	1	eQTL	0|GTEx/v8/Brain_Spinal_cord_cervical_c-1|NA	1	eQTL	0|GTEx/v8/Brain_Spinal_cord_cervical_c-1|NA	1	Positional,eQTL	37|GTEx/v8/Brain_Spinal_cord_cervical_c-1:GTEx/v8/Nerve_Tibial|Promoter_anchored_loops:Spleen:IMR90:Mesenchymal_Stem_Cell	1	eQTL	0|GTEx/v8/Brain_Spinal_cord_cervical_c-1|NA	4	1	1	NA	NA	NA	NA	NA	NA	NA	NA	NA	NA	NA	NA	NA	NA	NA	NA	NA	NA
PSMD7	proteasome 26S subunit, non-ATPase 7	5713	ENSG00000103035	HGNC:9565	S12|P40|MOV34|Rpn8		16q23.1	protein-coding gene	P51665	0.75801	0.9097	0.75801	0	0	NA	NA|NA|NA	0	NA	NA|NA|NA	0	NA	NA|NA|NA	1	CI	0|NA|IMR90	0	NA	NA|NA|NA	1	1	NA	NA	NA	NA	NA	NA	NA	NA	NA	NA	NA	NA	NA	NA	NA	NA	NA	NA	NA
PSME4	proteasome activator subunit 4	23198	ENSG00000068878	HGNC:20635	PA200|KIAA0077		02p16.2	protein-coding gene	Q14997	0.0061829	0.013415	0.0061829	0	0	NA	NA|NA|NA	0	NA	NA|NA|NA	0	NA	NA|NA|NA	0	NA	NA|NA|NA	0	NA	NA|NA|NA	0	NA	NA	NA	NA	1	NA	NA	NA	NA	1	1	1	1	NA	NA	NA	NA	NA	NA	NA
PTPRU	protein tyrosine phosphatase receptor type U	10076	ENSG00000060656	HGNC:9683	PTPRO|hPTP-J|PCP-2|FMI|PTP		01p35.3	protein-coding gene	Q92729	8.7414e-05	1.4263e-05	1.4263e-05	1	1	Positional	10|NA|NA	1	Positional	1|NA|NA	1	Positional	1|NA|NA	1	Positional,eQTL	10|GTEx/v8/Adipose_Subcutaneous:GTEx/v8/Muscle_Skeletal|NA	1	Positional	1|NA|NA	4	1	NA	NA	NA	NA	NA	NA	NA	1	1	1	1	1	1	NA	NA	NA	NA	NA	NA
RAB18	RAB18, member RAS oncogene family	22931	ENSG00000099246	HGNC:14244			10p12.1	protein-coding gene	Q9NP72	0.63945	0.029068	0.029068	0	0	NA	NA|NA|NA	0	NA	NA|NA|NA	0	NA	NA|NA|NA	0	NA	NA|NA|NA	0	NA	NA|NA|NA	0	NA	NA	NA	NA	NA	NA	NA	NA	NA	NA	NA	NA	NA	NA	NA	NA	NA	NA	NA	NA
RANGAP1	Ran GTPase activating protein 1	5905	ENSG00000100401	HGNC:9854	Fug1|KIAA1835	SD	22q13.2	protein-coding gene	P46060	0.0014114	0.0010074	0.0010074	0	1	Positional,eQTL	2|BRAINEAC/SNIG:GTEx/v8/Brain_Cerebellum|NA	1	eQTL	0|BRAINEAC/SNIG:GTEx/v8/Brain_Cerebellum|NA	1	eQTL	0|BRAINEAC/SNIG:GTEx/v8/Brain_Cerebellum|NA	1	Positional,eQTL	2|eQTLcatalogue/HipSci_ge_iPSC:eQTLGen_cis_eQTLs:BRAINEAC/SNIG:GTEx/v8/Brain_Cerebellum:GTEx/v8/Esophagus_Mucosa:GTEx/v8/Thyroid|NA	1	eQTL	0|BRAINEAC/SNIG:GTEx/v8/Brain_Cerebellum|NA	4	1	NA	1	1	NA	NA	NA	NA	NA	1	1	1	1	1	NA	NA	NA	NA	NA	NA
RASGRP1	RAS guanyl releasing protein 1	10125	ENSG00000172575	HGNC:9878	CalDAG-GEFII|RASGRP		15q14	protein-coding gene	O95267	0.12651	0.059807	0.059807	0	0	NA	NA|NA|NA	0	NA	NA|NA|NA	0	NA	NA|NA|NA	0	NA	NA|NA|NA	0	NA	NA|NA|NA	0	NA	NA	1	1	NA	NA	NA	NA	NA	1	1	1	1	NA	NA	NA	NA	NA	NA	NA
RBMS1	RNA binding motif single stranded interacting protein 1	5937	ENSG00000153250	HGNC:9907	SCR2|MSSP-1|MSSP-2|MSSP-3|YC1|HCC-4|DKFZp564H0764	C2orf12	02q24.2	protein-coding gene	P29558	0.13538	0.013577	0.013577	0	1	Positional	60|NA|NA	1	Positional	3|NA|NA	1	Positional	2|NA|NA	1	Positional,eQTL	60|eQTLcatalogue/Quach_2016_ge_monocyte_LPS:eQTLcatalogue/Quach_2016_ge_monocyte_Pam3CSK4|Aorta:Left_Ventricle:IMR90:Mesenchymal_Stem_Cell:Mesendoderm:Trophoblast-like_Cell:hESC	1	Positional,eQTL	3|eQTLcatalogue/Quach_2016_ge_monocyte_LPS:eQTLcatalogue/Quach_2016_ge_monocyte_Pam3CSK4|Left_Ventricle:IMR90:Mesenchymal_Stem_Cell:Mesendoderm:Trophoblast-like_Cell:hESC	4	1	NA	NA	NA	NA	NA	NA	NA	NA	NA	NA	NA	NA	NA	NA	NA	NA	NA	NA	NA
RBX1	ring-box 1	9978	ENSG00000100387	HGNC:9928	ROC1|RNF75|BA554C12.1		22q13.2	protein-coding gene	P62877	0.18764	0.013527	0.013527	0	0	NA	NA|NA|NA	0	NA	NA|NA|NA	0	NA	NA|NA|NA	1	CI	0|NA|Liver:GM12878:IMR90:Mesenchymal_Stem_Cell:Mesendoderm:Trophoblast-like_Cell:hESC	1	CI	0|NA|Liver:GM12878:IMR90:Mesenchymal_Stem_Cell:Mesendoderm:Trophoblast-like_Cell:hESC	2	1	NA	1	1	NA	NA	NA	NA	NA	1	1	1	1	NA	NA	NA	NA	NA	NA	NA
RERE	arginine-glutamic acid dipeptide repeats	473	ENSG00000142599	HGNC:9965	KIAA0458|ARP|ARG|DNB1|ATN2	ATN1L	01p36.23	protein-coding gene	Q9P2R6	0.0053713	0.010448	0.0053713	0	0	NA	NA|NA|NA	0	NA	NA|NA|NA	0	NA	NA|NA|NA	0	NA	NA|NA|NA	0	NA	NA|NA|NA	0	NA	NA	1	1	NA	1	NA	NA	NA	2	1	2	1	NA	NA	NA	NA	NA	NA	NA
RIMBP2	RIMS binding protein 2	23504	ENSG00000060709	HGNC:30339	KIAA0318|RBP2|MGC15831|RIM-BP2|PPP1R133		12q24.33	protein-coding gene	O15034	0.22973	0.41317	0.22973	0	0	NA	NA|NA|NA	0	NA	NA|NA|NA	0	NA	NA|NA|NA	0	NA	NA|NA|NA	0	NA	NA|NA|NA	0	NA	NA	NA	NA	NA	NA	NA	NA	NA	NA	NA	NA	NA	NA	NA	NA	NA	NA	NA	NA
RNF115	ring finger protein 115	27246	ENSG00000265491	HGNC:18154	CL469780	ZNF364	01q21.1	protein-coding gene	Q9Y4L5	0.0019367	0.00093758	0.00093758	1	0	NA	NA|NA|NA	0	NA	NA|NA|NA	0	NA	NA|NA|NA	0	NA	NA|NA|NA	0	NA	NA|NA|NA	0	NA	1	NA	NA	NA	NA	NA	NA	NA	NA	NA	NA	NA	NA	NA	NA	NA	NA	NA	NA
RUNX1T1	RUNX1 partner transcriptional co-repressor 1	862	ENSG00000079102	HGNC:1535	CDR|ETO|MTG8|ZMYND2	AML1T1|CBFA2T1	08q21.3	protein-coding gene	Q06455	0.77594	0.18682	0.18682	0	0	NA	NA|NA|NA	0	NA	NA|NA|NA	0	NA	NA|NA|NA	1	CI	0|NA|Left_Ventricle:IMR90:Mesenchymal_Stem_Cell:Mesendoderm:Trophoblast-like_Cell:hESC	0	NA	NA|NA|NA	1	1	NA	NA	NA	NA	NA	NA	NA	NA	NA	NA	NA	NA	NA	NA	NA	NA	NA	NA	NA
SCAPER	S-phase cyclin A associated protein in the ER	49855	ENSG00000140386	HGNC:13081	Zfp291	ZNF291	15q24.3	protein-coding gene	Q9BY12	0.025104	0.019002	0.019002	0	0	NA	NA|NA|NA	0	NA	NA|NA|NA	0	NA	NA|NA|NA	0	NA	NA|NA|NA	0	NA	NA|NA|NA	0	NA	NA	NA	NA	NA	NA	NA	NA	NA	NA	NA	NA	NA	NA	NA	NA	NA	NA	NA	NA
SELE	selectin E	6401	ENSG00000007908	HGNC:10718	ESEL|CD62E	ELAM1|ELAM	01q24.2	protein-coding gene	P16581	0.90369	0.76191	0.76191	0	0	NA	NA|NA|NA	0	NA	NA|NA|NA	0	NA	NA|NA|NA	0	NA	NA|NA|NA	0	NA	NA|NA|NA	0	NA	NA	NA	NA	NA	NA	NA	NA	NA	NA	NA	NA	NA	NA	NA	NA	NA	NA	NA	NA
SENP6	SUMO specific peptidase 6	26054	ENSG00000112701	HGNC:20944	SUSP1|KIAA0797		06q14.1	protein-coding gene	Q9GZR1	0.038707	0.031751	0.031751	0	0	NA	NA|NA|NA	0	NA	NA|NA|NA	0	NA	NA|NA|NA	0	NA	NA|NA|NA	0	NA	NA|NA|NA	0	NA	NA	NA	NA	NA	NA	NA	NA	NA	NA	NA	NA	NA	NA	NA	NA	NA	NA	NA	NA
SGPP2	sphingosine-1-phosphate phosphatase 2	130367	ENSG00000163082	HGNC:19953	SPP2|FLJ39004		02q36.1	protein-coding gene	Q8IWX5	0.05007	0.054396	0.05007	0	1	Positional,eQTL	11|PsychENCODE_eQTLs|NA	0	NA	NA|NA|NA	0	NA	NA|NA|NA	1	Positional,eQTL	11|PsychENCODE_eQTLs|NA	0	NA	NA|NA|NA	2	1	NA	NA	NA	NA	NA	NA	NA	1	1	1	1	1	NA	NA	NA	NA	NA	NA	NA
SLC23A1	solute carrier family 23 member 1	9963	ENSG00000170482	HGNC:10974	YSPL3|SVCT1	SLC23A2	05q31.2	protein-coding gene	Q9UHI7	0.00050526	0.0015122	0.00050526	1	0	NA	NA|NA|NA	0	NA	NA|NA|NA	0	NA	NA|NA|NA	0	NA	NA|NA|NA	0	NA	NA|NA|NA	0	NA	1	NA	NA	NA	NA	NA	NA	NA	NA	NA	NA	NA	NA	NA	NA	NA	NA	NA	NA
SLC25A17	solute carrier family 25 member 17	10478	ENSG00000100372	HGNC:10987	PMP34		22q13.2	protein-coding gene	O43808	0.013697	0.049724	0.013697	0	1	eQTL	0|PsychENCODE_eQTLs:GTEx/v8/Brain_Cerebellum|NA	0	NA	NA|NA|NA	0	NA	NA|NA|NA	1	eQTL,CI	0|eQTLcatalogue/Quach_2016_ge_monocyte_Pam3CSK4:PsychENCODE_eQTLs:eQTLGen_cis_eQTLs:GTEx/v8/Adipose_Subcutaneous:GTEx/v8/Brain_Cerebellum:GTEx/v8/Esophagus_Mucosa:GTEx/v8/Lung:GTEx/v8/Cells_Cultured_fibroblasts:GTEx/v8/Thyroid|IMR90:Mesenchymal_Stem_Cell	1	eQTL,CI	0|eQTLGen_cis_eQTLs:GTEx/v8/Adipose_Subcutaneous|IMR90:Mesenchymal_Stem_Cell	3	1	NA	1	1	NA	NA	NA	NA	NA	1	1	1	1	NA	NA	NA	NA	NA	NA	NA
SLC26A2	solute carrier family 26 member 2	1836	ENSG00000155850	HGNC:10994	DTDST	DTD	05q32	protein-coding gene	P50443	0.98541	0.79104	0.79104	0	0	NA	NA|NA|NA	0	NA	NA|NA|NA	0	NA	NA|NA|NA	0	NA	NA|NA|NA	0	NA	NA|NA|NA	0	NA	NA	NA	NA	NA	NA	NA	NA	NA	NA	NA	NA	NA	NA	NA	NA	NA	NA	NA	NA
SLC27A2	solute carrier family 27 member 2	11001	ENSG00000140284	HGNC:10996	FATP2|hFACVL1|VLACS|VLCS|HsT17226|ACSVL1	FACVL1	15q21.2	protein-coding gene	O14975	0.038916	0.00031109	0.00031109	1	0	NA	NA|NA|NA	0	NA	NA|NA|NA	0	NA	NA|NA|NA	0	NA	NA|NA|NA	0	NA	NA|NA|NA	0	NA	NA	NA	NA	NA	NA	NA	NA	NA	NA	NA	NA	NA	NA	NA	NA	NA	NA	NA	NA
SLC4A10	solute carrier family 4 member 10	57282	ENSG00000144290	HGNC:13811	NBCn2|NCBE		02q24.2	protein-coding gene	Q6U841	0.42713	0.59299	0.42713	0	1	Positional	31|NA|NA	1	Positional	4|NA|NA	1	Positional	2|NA|NA	1	Positional,CI	31|NA|Left_Ventricle:GM12878:IMR90:Mesenchymal_Stem_Cell:Mesendoderm:Trophoblast-like_Cell:hESC	1	Positional	4|NA|NA	4	1	NA	NA	NA	NA	NA	NA	NA	NA	NA	NA	NA	NA	NA	NA	NA	NA	NA	NA	NA
SORT1	sortilin 1	6272	ENSG00000134243	HGNC:11186	Gp95|NT3		01p13.3	protein-coding gene	Q99523	0.2603	0.49546	0.2603	0	0	NA	NA|NA|NA	0	NA	NA|NA|NA	0	NA	NA|NA|NA	0	NA	NA|NA|NA	0	NA	NA|NA|NA	0	NA	NA	NA	NA	NA	NA	NA	NA	NA	NA	NA	NA	NA	NA	NA	NA	NA	NA	NA	NA
SPATA24	spermatogenesis associated 24	202051	ENSG00000170469	HGNC:27322	T6441|CCDC161		05q31.2	protein-coding gene	Q86W54	0.00015457	0.00084929	0.00015457	1	0	NA	NA|NA|NA	0	NA	NA|NA|NA	0	NA	NA|NA|NA	0	NA	NA|NA|NA	0	NA	NA|NA|NA	0	NA	1	NA	NA	NA	NA	NA	NA	NA	NA	NA	NA	NA	NA	NA	NA	NA	NA	NA	NA
SPATS2	spermatogenesis associated serine rich 2	65244	ENSG00000123352	HGNC:18650	SPATA10|SCR59|FLJ13117		12q13.12	protein-coding gene	Q86XZ4	6.3914e-05	3.5257e-06	3.5257e-06	1	1	eQTL,CI	0|PsychENCODE_eQTLs|Adult_Cortex:Fetal_Cortex	1	eQTL	0|PsychENCODE_eQTLs|NA	0	NA	NA|NA|NA	1	eQTL,CI	0|eQTLcatalogue/TwinsUK_ge_skin:PsychENCODE_eQTLs:GTEx/v8/Artery_Tibial:GTEx/v8/Muscle_Skeletal:GTEx/v8/Nerve_Tibial:GTEx/v8/Pancreas:GTEx/v8/Skin_Not_Sun_Exposed_Suprapubic:GTEx/v8/Skin_Sun_Exposed_Lower_leg|Adult_Cortex:Fetal_Cortex:GM12878:IMR90:Mesenchymal_Stem_Cell:Trophoblast-like_Cell	1	eQTL,CI	0|eQTLcatalogue/TwinsUK_ge_skin:PsychENCODE_eQTLs:GTEx/v8/Artery_Tibial:GTEx/v8/Muscle_Skeletal:GTEx/v8/Pancreas:GTEx/v8/Skin_Not_Sun_Exposed_Suprapubic:GTEx/v8/Skin_Sun_Exposed_Lower_leg|GM12878:IMR90:Mesenchymal_Stem_Cell	4	1	1	NA	NA	1	NA	NA	NA	NA	1	1	1	1	NA	NA	NA	NA	NA	NA	NA
SRSF3	serine and arginine rich splicing factor 3	6428	ENSG00000112081	HGNC:10785	SRp20	SFRS3	06p21.31-p21.2	protein-coding gene	P84103	0.75165	0.0024383	0.0024383	0	1	CI	0|NA|Adult_Cortex	0	NA	NA|NA|NA	0	NA	NA|NA|NA	1	eQTL,CI	0|eQTLGen_cis_eQTLs|Adult_Cortex:Fetal_Cortex:GM12878:IMR90:Mesenchymal_Stem_Cell	1	eQTL	0|eQTLGen_cis_eQTLs|NA	3	1	NA	NA	NA	NA	NA	NA	NA	NA	NA	NA	NA	NA	NA	NA	NA	NA	NA	NA	NA
SRSF4	serine and arginine rich splicing factor 4	6429	ENSG00000116350	HGNC:10786	SRP75	SFRS4	01p35.3	protein-coding gene	Q08170	0.000167	0.00052679	0.000167	1	1	Positional,eQTL	9|CMC_SVA_cis|NA	0	NA	NA|NA|NA	0	NA	NA|NA|NA	1	Positional,eQTL	9|eQTLGen_cis_eQTLs:CMC_SVA_cis:GTEx/v8/Esophagus_Mucosa|IMR90:Mesendoderm:Trophoblast-like_Cell:hESC	1	eQTL	0|eQTLGen_cis_eQTLs:GTEx/v8/Esophagus_Mucosa|NA	3	1	NA	NA	NA	NA	NA	NA	NA	NA	NA	NA	NA	NA	NA	NA	NA	NA	NA	NA	NA
SRSF7	serine and arginine rich splicing factor 7	6432	ENSG00000115875	HGNC:10789	9G8|ZCRB2|HSSG1|AAG3|RBM37|ZCCHC20	SFRS7	02p22.1	protein-coding gene	Q16629	0.00040225	0.0018415	0.00040225	1	0	NA	NA|NA|NA	0	NA	NA|NA|NA	0	NA	NA|NA|NA	0	NA	NA|NA|NA	0	NA	NA|NA|NA	0	NA	NA	NA	NA	NA	NA	NA	NA	NA	NA	NA	NA	NA	1	NA	NA	NA	NA	NA	NA
ST13	ST13 Hsp70 interacting protein	6767	ENSG00000100380	HGNC:11343	SNC6|HSPABP1|HIP|P48|FAM10A1		22q13.2	protein-coding gene	P50502	0.063668	0.044165	0.044165	0	0	NA	NA|NA|NA	0	NA	NA|NA|NA	0	NA	NA|NA|NA	1	eQTL,CI	0|eQTLGen_cis_eQTLs:GTEx/v8/Adipose_Subcutaneous:GTEx/v8/Colon_Transverse:GTEx/v8/Liver:GTEx/v8/Pancreas:GTEx/v8/Cells_Cultured_fibroblasts|Left_Ventricle:GM12878:IMR90:Mesenchymal_Stem_Cell:Mesendoderm:Trophoblast-like_Cell:hESC	1	eQTL,CI	0|GTEx/v8/Colon_Transverse:GTEx/v8/Pancreas|Left_Ventricle:GM12878:IMR90:Mesenchymal_Stem_Cell:Mesendoderm:Trophoblast-like_Cell:hESC	2	1	NA	1	1	NA	NA	NA	NA	NA	1	1	1	1	NA	NA	NA	NA	NA	NA	NA
STK38	serine/threonine kinase 38	11329	ENSG00000112079	HGNC:17847	NDR|NDR1		06p21.31	protein-coding gene	Q15208	0.19941	0.31094	0.19941	0	1	CI	0|NA|Adult_Cortex	0	NA	NA|NA|NA	0	NA	NA|NA|NA	1	eQTL,CI	0|eQTLGen_cis_eQTLs|Adult_Cortex:IMR90	0	NA	NA|NA|NA	2	1	NA	NA	NA	NA	NA	NA	NA	NA	NA	NA	NA	NA	NA	NA	NA	NA	NA	NA	NA
STON2	stonin 2	85439	ENSG00000140022	HGNC:30652	STNB2|STN2		14q31.1	protein-coding gene	Q8WXE9	0.61007	0.68463	0.61007	0	0	NA	NA|NA|NA	0	NA	NA|NA|NA	0	NA	NA|NA|NA	1	CI	0|NA|Mesenchymal_Stem_Cell:Mesendoderm:hESC	0	NA	NA|NA|NA	1	1	NA	NA	NA	NA	NA	NA	NA	NA	NA	NA	NA	NA	NA	NA	NA	NA	NA	NA	NA
TANK	TRAF family member associated NFKB activator	10010	ENSG00000136560	HGNC:11562	I-TRAF	TRAF2	02q24.2	protein-coding gene	Q92844	0.033855	0.050312	0.033855	0	1	Positional	9|NA|NA	0	NA	NA|NA|NA	0	NA	NA|NA|NA	1	Positional,eQTL	9|GTEx/v8/Esophagus_Muscularis|EP_correlation_cell_type_oneway:Aorta:Left_Ventricle:Liver:GM12878:IMR90:Mesenchymal_Stem_Cell:Mesendoderm:Trophoblast-like_Cell:hESC	1	CI	0|NA|IMR90:Mesenchymal_Stem_Cell:Mesendoderm:Trophoblast-like_Cell:hESC	3	1	NA	NA	NA	NA	NA	NA	NA	NA	NA	NA	NA	NA	NA	NA	NA	NA	NA	NA	NA
TBC1D5	TBC1 domain family member 5	9779	ENSG00000131374	HGNC:19166	KIAA0210		03p24.3	protein-coding gene	Q92609	0.27483	0.2708	0.2708	0	0	NA	NA|NA|NA	0	NA	NA|NA|NA	0	NA	NA|NA|NA	0	NA	NA|NA|NA	0	NA	NA|NA|NA	0	NA	NA	NA	NA	NA	1	NA	NA	NA	1	1	1	1	NA	NA	NA	NA	NA	NA	NA
TBR1	T-box brain transcription factor 1	10716	ENSG00000136535	HGNC:11590			02q24.2	protein-coding gene	Q16650	0.56886	0.43059	0.43059	0	1	Positional	2|NA|NA	1	Positional	1|NA|NA	1	Positional	1|NA|NA	1	Positional,CI	2|NA|Left_Ventricle:GM12878:IMR90:Mesenchymal_Stem_Cell:Mesendoderm:Trophoblast-like_Cell:hESC	1	Positional	1|NA|NA	4	1	NA	NA	NA	NA	NA	NA	NA	NA	NA	NA	NA	NA	NA	NA	NA	NA	NA	NA	NA
TDRD3	tudor domain containing 3	81550	ENSG00000083544	HGNC:20612	FLJ21007		13q21.2	protein-coding gene	Q9H7E2	0.019166	0.00093374	0.00093374	1	0	NA	NA|NA|NA	0	NA	NA|NA|NA	0	NA	NA|NA|NA	0	NA	NA|NA|NA	0	NA	NA|NA|NA	0	NA	NA	NA	NA	NA	NA	NA	NA	NA	NA	NA	NA	NA	NA	NA	NA	NA	NA	NA	NA
TENM2	teneurin transmembrane protein 2	57451	ENSG00000145934	HGNC:29943	KIAA1127|Ten-M2|TEN2	ODZ2	05q34	protein-coding gene	Q9NT68	0.026178	0.0052218	0.0052218	0	0	NA	NA|NA|NA	0	NA	NA|NA|NA	0	NA	NA|NA|NA	0	NA	NA|NA|NA	0	NA	NA|NA|NA	0	NA	NA	NA	NA	1	NA	NA	NA	1	2	1	2	1	NA	NA	NA	NA	NA	NA	NA
TENM4	teneurin transmembrane protein 4	26011	ENSG00000149256	HGNC:29945	KIAA1302|Ten-M4|TEN4	ODZ4	11q14.1	protein-coding gene	Q6N022	0.1466	0.22881	0.1466	0	1	Positional	5|NA|NA	0	NA	NA|NA|NA	0	NA	NA|NA|NA	1	Positional,CI	5|NA|IMR90:Mesenchymal_Stem_Cell:Mesendoderm:hESC	0	NA	NA|NA|NA	2	1	NA	NA	NA	NA	1	NA	NA	1	2	1	2	1	NA	NA	NA	NA	NA	NA	NA
THBS1	thrombospondin 1	7057	ENSG00000137801	HGNC:11785	TSP1|THBS|TSP|THBS-1|TSP-1		15q14	protein-coding gene	P07996	0.46014	0.71191	0.46014	0	0	NA	NA|NA|NA	0	NA	NA|NA|NA	0	NA	NA|NA|NA	0	NA	NA|NA|NA	0	NA	NA|NA|NA	0	NA	NA	1	1	NA	NA	NA	NA	NA	1	1	1	1	NA	NA	NA	NA	NA	NA	NA
TMBIM6	transmembrane BAX inhibitor motif containing 6	7009	ENSG00000139644	HGNC:11723	BI-1|BAXI1	TEGT	12q13.12	protein-coding gene	P55061	0.0020823	0.00095924	0.00095924	1	1	eQTL,CI	0|PsychENCODE_eQTLs|Adult_Cortex:Fetal_Cortex	1	eQTL	0|PsychENCODE_eQTLs|NA	0	NA	NA|NA|NA	1	eQTL,CI	0|PsychENCODE_eQTLs|Adult_Cortex:Fetal_Cortex:GM12878:IMR90:Mesenchymal_Stem_Cell	1	eQTL,CI	0|PsychENCODE_eQTLs|GM12878:IMR90:Mesenchymal_Stem_Cell	4	1	NA	NA	NA	NA	NA	NA	NA	NA	NA	NA	NA	NA	NA	NA	NA	NA	NA	NA	NA
TMEM200B	transmembrane protein 200B	399474	ENSG00000253304	HGNC:33785	TTMB		01p35.3	protein-coding gene	Q69YZ2	0.28215	0.001252	0.001252	0	0	NA	NA|NA|NA	0	NA	NA|NA|NA	0	NA	NA|NA|NA	1	eQTL	0|eQTLcatalogue/TwinsUK_ge_fat:GTEx/v8/Adipose_Subcutaneous:GTEx/v8/Adipose_Visceral_Omentum:GTEx/v8/Artery_Tibial:GTEx/v8/Breast_Mammary_Tissue:GTEx/v8/Esophagus_Mucosa:GTEx/v8/Cells_Cultured_fibroblasts|NA	1	eQTL	0|eQTLcatalogue/TwinsUK_ge_fat:GTEx/v8/Adipose_Subcutaneous:GTEx/v8/Breast_Mammary_Tissue|NA	2	1	1	NA	NA	NA	NA	NA	NA	NA	NA	NA	NA	NA	NA	NA	NA	NA	NA	NA	NA
TNN	tenascin N	63923	ENSG00000120332	HGNC:22942	TNW		01q25.1	protein-coding gene	Q9UQP3	0.28702	0.049387	0.049387	0	0	NA	NA|NA|NA	0	NA	NA|NA|NA	0	NA	NA|NA|NA	0	NA	NA|NA|NA	0	NA	NA|NA|NA	0	NA	NA	NA	NA	NA	NA	NA	NA	NA	NA	NA	NA	NA	NA	NA	NA	NA	NA	NA	NA
TOB2	transducer of ERBB2, 2	10766	ENSG00000183864	HGNC:11980	TOBL|TOB4|bK223H9|APRO5	TROB2	22q13.2	protein-coding gene	Q14106	0.032122	0.017661	0.017661	0	0	NA	NA|NA|NA	0	NA	NA|NA|NA	0	NA	NA|NA|NA	0	NA	NA|NA|NA	0	NA	NA|NA|NA	0	NA	NA	1	1	NA	NA	NA	NA	NA	1	1	1	1	NA	NA	NA	NA	NA	NA	NA
TRIO	trio Rho guanine nucleotide exchange factor	7204	ENSG00000038382	HGNC:12303	ARHGEF23		05p15.2	protein-coding gene	O75962	0.40395	0.3726	0.3726	0	0	NA	NA|NA|NA	0	NA	NA|NA|NA	0	NA	NA|NA|NA	0	NA	NA|NA|NA	0	NA	NA|NA|NA	0	NA	NA	NA	NA	NA	NA	NA	NA	NA	NA	NA	NA	NA	NA	NA	NA	NA	NA	NA	NA
TROAP	trophinin associated protein	10024	ENSG00000135451	HGNC:12327	TASTIN		12q13.12	protein-coding gene	Q12815	0.004118	9.8042e-06	9.8042e-06	1	1	Positional,CI	21|NA|Adult_Cortex:Fetal_Cortex	1	Positional	2|NA|NA	1	Positional	1|NA|NA	1	Positional,eQTL	21|eQTLcatalogue/TwinsUK_ge_LCL:GTEx/v8/Esophagus_Mucosa:GTEx/v8/Skin_Not_Sun_Exposed_Suprapubic:GTEx/v8/Skin_Sun_Exposed_Lower_leg:GTEx/v8/Testis|Adult_Cortex:Fetal_Cortex:Spleen:IMR90:Mesenchymal_Stem_Cell	1	Positional,eQTL	2|eQTLcatalogue/TwinsUK_ge_LCL:GTEx/v8/Esophagus_Mucosa:GTEx/v8/Skin_Not_Sun_Exposed_Suprapubic:GTEx/v8/Skin_Sun_Exposed_Lower_leg:GTEx/v8/Testis|NA	4	1	1	NA	NA	NA	NA	NA	NA	NA	NA	NA	NA	NA	NA	NA	NA	NA	NA	NA	NA
TSHR	thyroid stimulating hormone receptor	7253	ENSG00000165409	HGNC:12373	LGR3		14q24-q31	protein-coding gene	P16473	0.00085946	0.012389	0.00085946	1	1	Positional	9|NA|NA	0	NA	NA|NA|NA	0	NA	NA|NA|NA	1	Positional,CI	9|NA|Liver:GM12878:IMR90:Mesenchymal_Stem_Cell:Mesendoderm:Trophoblast-like_Cell:hESC	0	NA	NA|NA|NA	2	1	NA	NA	NA	NA	NA	NA	NA	1	1	1	1	1	NA	NA	NA	NA	NA	NA	NA
TUBA1B	tubulin alpha 1b	10376	ENSG00000123416	HGNC:18809	K-ALPHA-1		12q13.12	protein-coding gene	P68363	0.20612	0.15226	0.15226	0	0	NA	NA|NA|NA	0	NA	NA|NA|NA	0	NA	NA|NA|NA	1	CI	0|NA|Liver:GM12878:IMR90:Mesenchymal_Stem_Cell:Mesendoderm:Trophoblast-like_Cell:hESC	0	NA	NA|NA|NA	1	1	1	NA	NA	NA	NA	NA	NA	NA	NA	NA	NA	NA	NA	NA	NA	NA	NA	NA	NA
TUBA1C	tubulin alpha 1c	84790	ENSG00000167553	HGNC:20768	MGC14580|MGC10851|bcm948	TUBA6	12q13.12	protein-coding gene	Q9BQE3	0.39657	0.00051127	0.00051127	1	1	Positional,eQTL	4|CMC_SVA_cis:CMC_NoSVA_cis|NA	1	eQTL	0|CMC_SVA_cis:CMC_NoSVA_cis|NA	1	eQTL	0|CMC_SVA_cis:CMC_NoSVA_cis|NA	1	Positional,eQTL	4|eQTLGen_cis_eQTLs:CMC_SVA_cis:CMC_NoSVA_cis:GTEx/v8/Whole_Blood|IMR90:Mesenchymal_Stem_Cell	1	eQTL	0|eQTLGen_cis_eQTLs:CMC_SVA_cis:CMC_NoSVA_cis|NA	4	1	1	NA	NA	NA	NA	NA	NA	NA	NA	NA	NA	NA	NA	NA	NA	NA	NA	NA	NA
UBAP2	ubiquitin associated protein 2	55833	ENSG00000137073	HGNC:14185	KIAA1491|bA176F3.5|FLJ22435		09p13.3	protein-coding gene	Q5T6F2	0.0010333	0.0021663	0.0010333	0	0	NA	NA|NA|NA	0	NA	NA|NA|NA	0	NA	NA|NA|NA	0	NA	NA|NA|NA	0	NA	NA|NA|NA	0	NA	NA	NA	NA	NA	NA	NA	NA	NA	NA	NA	NA	NA	1	NA	NA	NA	NA	NA	NA
USF2	upstream transcription factor 2, c-fos interacting	7392	ENSG00000105698	HGNC:12594	FIP|bHLHb12		19q13.12	protein-coding gene	Q15853	0.49562	0.039759	0.039759	0	0	NA	NA|NA|NA	0	NA	NA|NA|NA	0	NA	NA|NA|NA	0	NA	NA|NA|NA	0	NA	NA|NA|NA	0	NA	1	NA	NA	NA	NA	NA	NA	NA	NA	NA	NA	NA	NA	NA	NA	NA	NA	NA	NA
VGF	VGF nerve growth factor inducible	7425	ENSG00000128564	HGNC:12684	SCG7|SgVII		07q22.1	protein-coding gene	O15240	0.94176	0.61301	0.61301	0	0	NA	NA|NA|NA	0	NA	NA|NA|NA	0	NA	NA|NA|NA	0	NA	NA|NA|NA	0	NA	NA|NA|NA	0	NA	NA	NA	NA	NA	NA	NA	NA	NA	NA	NA	NA	NA	NA	NA	NA	NA	NA	NA	NA
VPS13A	vacuolar protein sorting 13 homolog A	23230	ENSG00000197969	HGNC:1908	KIAA0986	CHAC	09q21.2	protein-coding gene	Q96RL7	0.0027933	0.0042973	0.0027933	0	0	NA	NA|NA|NA	0	NA	NA|NA|NA	0	NA	NA|NA|NA	0	NA	NA|NA|NA	0	NA	NA|NA|NA	0	NA	1	NA	NA	NA	NA	NA	NA	NA	NA	NA	NA	NA	NA	NA	NA	NA	NA	NA	NA
WDR61	WD repeat domain 61	80349	ENSG00000140395	HGNC:30300	REC14|SKI8		15q25.1	protein-coding gene	Q9GZS3	0.12221	0.10748	0.10748	0	0	NA	NA|NA|NA	0	NA	NA|NA|NA	0	NA	NA|NA|NA	0	NA	NA|NA|NA	0	NA	NA|NA|NA	0	NA	NA	0	1	NA	NA	NA	NA	NA	0	NA	1	1	NA	NA	NA	NA	NA	NA	NA
WDR62	WD repeat domain 62	284403	ENSG00000075702	HGNC:24502	DKFZP434J046|FLJ33298	C19orf14|MCPH2	19q13.12	protein-coding gene	O43379	0.0016473	0.0044073	0.0016473	0	0	NA	NA|NA|NA	0	NA	NA|NA|NA	0	NA	NA|NA|NA	0	NA	NA|NA|NA	0	NA	NA|NA|NA	0	NA	1	NA	NA	NA	NA	NA	NA	NA	NA	NA	NA	NA	NA	NA	NA	NA	NA	NA	NA
WNT10B	Wnt family member 10B	7480	ENSG00000169884	HGNC:12775	WNT-12|SHFM6		12q13.12	protein-coding gene	O00744	0.15513	0.077454	0.077454	0	0	NA	NA|NA|NA	0	NA	NA|NA|NA	0	NA	NA|NA|NA	1	CI	0|NA|IMR90	0	NA	NA|NA|NA	1	1	NA	NA	NA	NA	NA	NA	NA	NA	NA	NA	NA	NA	NA	NA	NA	NA	NA	NA	NA
WNT3	Wnt family member 3	7473	ENSG00000108379	HGNC:12782	MGC131950|MGC138321|MGC138323	INT4	17q21.31-q21.32	protein-coding gene	P56703	0.031761	0.0017152	0.0017152	0	0	NA	NA|NA|NA	0	NA	NA|NA|NA	0	NA	NA|NA|NA	0	NA	NA|NA|NA	0	NA	NA|NA|NA	0	NA	1	NA	NA	NA	NA	1	1	NA	1	1	1	1	NA	NA	NA	NA	NA	NA	NA
WWC1	WW and C2 domain containing 1	23286	ENSG00000113645	HGNC:29435	KIBRA|KIAA0869|PPP1R168		05q34	protein-coding gene	Q8IX03	0.0037538	0.0063466	0.0037538	0	0	NA	NA|NA|NA	0	NA	NA|NA|NA	0	NA	NA|NA|NA	0	NA	NA|NA|NA	0	NA	NA|NA|NA	0	NA	NA	NA	NA	NA	NA	NA	NA	NA	NA	NA	NA	NA	NA	NA	NA	NA	1	1	NA
XPNPEP3	X-prolyl aminopeptidase 3	63929	ENSG00000196236	HGNC:28052	APP3|NPHPL1|ICP55		22q13.2	protein-coding gene	Q9NQH7	0.12849	0.01374	0.01374	0	1	eQTL	0|PsychENCODE_eQTLs:xQTLServer_eQTLs|NA	1	eQTL	0|PsychENCODE_eQTLs:xQTLServer_eQTLs|NA	1	eQTL	0|PsychENCODE_eQTLs:xQTLServer_eQTLs|NA	1	eQTL,CI	0|eQTLcatalogue/BLUEPRINT_ge_monocyte:eQTLcatalogue/BLUEPRINT_ge_T-cell:eQTLcatalogue/Lepik_2017_ge_blood:PsychENCODE_eQTLs:DICE/T_CD8_naive:eQTLGen_cis_eQTLs:BIOSQTL/BIOS_eQTL_geneLevel:xQTLServer_eQTLs:GTEx/v8/Adipose_Subcutaneous:GTEx/v8/Adipose_Visceral_Omentum:GTEx/v8/Whole_Blood:GTEx/v8/Artery_Tibial:GTEx/v8/Breast_Mammary_Tissue:GTEx/v8/Esophagus_Mucosa:GTEx/v8/Esophagus_Muscularis:GTEx/v8…	1	eQTL,CI	0|eQTLcatalogue/BLUEPRINT_ge_T-cell:PsychENCODE_eQTLs:eQTLGen_cis_eQTLs:BIOSQTL/BIOS_eQTL_geneLevel:xQTLServer_eQTLs:GTEx/v8/Adipose_Subcutaneous:GTEx/v8/Adipose_Visceral_Omentum:GTEx/v8/Artery_Tibial:GTEx/v8/Breast_Mammary_Tissue:GTEx/v8/Lung:GTEx/v8/Nerve_Tibial:GTEx/v8/Cells_Cultured_fibroblasts:GTEx/v8/Thyroid|Left_Ventricle:GM12878:IMR90:Mesenchymal_Stem_Cell:Mesendoderm:Trophoblast-like_Cel…	4	1	NA	1	1	NA	NA	NA	NA	NA	1	1	1	1	NA	NA	NA	NA	NA	NA	NA
XRCC6	X-ray repair cross complementing 6	2547	ENSG00000196419	HGNC:4055	D22S731|D22S671|KU70|ML8	G22P1	22q13.2	protein-coding gene	P12956	0.25233	0.1044	0.1044	0	1	CI	0|NA|Promoter_anchored_loops	1	CI	0|NA|Promoter_anchored_loops	1	CI	0|NA|Promoter_anchored_loops	1	CI	0|NA|Promoter_anchored_loops:Left_Ventricle	1	CI	0|NA|Promoter_anchored_loops:Left_Ventricle	4	1	NA	1	1	NA	NA	NA	NA	NA	1	1	1	1	NA	NA	NA	NA	NA	NA	NA
XRN2	5'-3' exoribonuclease 2	22803	ENSG00000088930	HGNC:12836			20p11.22	protein-coding gene	Q9H0D6	0.15176	0.19795	0.15176	0	0	NA	NA|NA|NA	0	NA	NA|NA|NA	0	NA	NA|NA|NA	0	NA	NA|NA|NA	0	NA	NA|NA|NA	0	NA	1	NA	NA	NA	NA	1	1	NA	1	1	1	1	NA	NA	NA	NA	NA	NA	NA
ZC3H7B	zinc finger CCCH-type containing 7B	23264	ENSG00000100403	HGNC:30869	RoXaN|FLJ13787|DKFZp434K0920|KIAA1031		22q13.2	protein-coding gene	Q9UGR2	0.010594	0.0017085	0.0017085	0	1	eQTL	0|GTEx/v8/Brain_Cerebellum|NA	0	NA	NA|NA|NA	0	NA	NA|NA|NA	1	eQTL	0|GTEx/v8/Brain_Cerebellum:GTEx/v8/Esophagus_Mucosa:GTEx/v8/Cells_Cultured_fibroblasts:GTEx/v8/Thyroid|NA	1	eQTL	0|GTEx/v8/Esophagus_Mucosa:GTEx/v8/Thyroid|NA	3	1	1	1	1	1	NA	NA	NA	NA	2	1	2	1	1	NA	NA	NA	NA	NA	NA
ZFYVE28	zinc finger FYVE-type containing 28	57732	ENSG00000159733	HGNC:29334	KIAA1643|lst-2		04p16.3	protein-coding gene	Q9HCC9	0.23861	0.011439	0.011439	0	1	Positional,CI	19|NA|EP_correlation_cell_type_oneway	0	NA	NA|NA|NA	0	NA	NA|NA|NA	1	Positional,eQTL	19|eQTLcatalogue/BLUEPRINT_ge_monocyte:eQTLcatalogue/BLUEPRINT_ge_T-cell:eQTLcatalogue/Fairfax_2014_IFN24:eQTLcatalogue/Fairfax_2014_naive:eQTLcatalogue/GEUVADIS_ge_LCL:eQTLcatalogue/Lepik_2017_ge_blood:eQTLcatalogue/Quach_2016_ge_monocyte_IAV:eQTLcatalogue/Quach_2016_ge_monocyte_naive:eQTLcatalogue/TwinsUK_ge_fat:eQTLcatalogue/TwinsUK_ge_LCL:DICE/Monocyte_classical:DICE/T_CD4_naive_TREG:eQTLGen_…	0	NA	NA|NA|NA	2	1	1	NA	NA	NA	NA	NA	NA	NA	NA	NA	NA	NA	NA	NA	NA	NA	NA	NA	NA
ZNF664	zinc finger protein 664	144348	ENSG00000179195	HGNC:25406	ZFOC1|DKFZp761B128	ZNF176	12q24.31	protein-coding gene	Q8N3J9	0.0014122	0.00079855	0.00079855	1	0	NA	NA|NA|NA	0	NA	NA|NA|NA	0	NA	NA|NA|NA	0	NA	NA|NA|NA	0	NA	NA|NA|NA	0	NA	NA	NA	NA	NA	NA	NA	NA	NA	NA	NA	NA	NA	NA	NA	NA	NA	NA	NA	NA
ZNF74	zinc finger protein 74	7625	ENSG00000185252	HGNC:13144	Cos52|Zfp520|ZNF520		22q11.21	protein-coding gene	Q16587	0.12347	0.14325	0.12347	0	0	NA	NA|NA|NA	0	NA	NA|NA|NA	0	NA	NA|NA|NA	0	NA	NA|NA|NA	0	NA	NA|NA|NA	0	NA	NA	NA	NA	NA	NA	NA	NA	NA	NA	NA	NA	NA	NA	NA	NA	NA	NA	NA	NA
ZNHIT3	zinc finger HIT-type containing 3	9326	ENSG00000273611	HGNC:12309	Hit1	TRIP3	17q12	protein-coding gene	Q15649	5.7756e-05	0.0002922	5.7756e-05	1	0	NA	NA|NA|NA	0	NA	NA|NA|NA	0	NA	NA|NA|NA	0	NA	NA|NA|NA	0	NA	NA|NA|NA	0	NA	1	NA	NA	NA	NA	NA	NA	NA	NA	NA	NA	NA	NA	NA	NA	NA	NA	NA	NA
ADAMTS6	ADAM metallopeptidase with thrombospondin type 1 motif 6	11174	ENSG00000049192	HGNC:222	ADAM-TS6		05q12.3	protein-coding gene	Q9UKP5	0.69237	0.77167	0.69237	0	0	NA	NA|NA|NA	0	NA	NA|NA|NA	0	NA	NA|NA|NA	0	NA	NA|NA|NA	0	NA	NA|NA|NA	0	NA	NA	NA	NA	NA	NA	NA	NA	NA	NA	NA	NA	NA	NA	NA	NA	NA	0	1	NA
C10orf67	chromosome 10 open reading frame 67	256815	ENSG00000179133	HGNC:28716	MGC46732|bA215C7.4	LINC01552|C10orf115	10p12.2	protein-coding gene	Q8IYJ2	0.42424	0.15994	0.15994	0	0	NA	NA|NA|NA	0	NA	NA|NA|NA	0	NA	NA|NA|NA	0	NA	NA|NA|NA	0	NA	NA|NA|NA	0	NA	NA	NA	NA	NA	NA	NA	NA	1	1	1	1	1	NA	NA	NA	NA	NA	NA	NA
C2orf49	chromosome 2 open reading frame 49	79074	ENSG00000135974	HGNC:28772	MGC5509|asw		02q12.2	protein-coding gene	Q9BVC5	6.8185e-05	0.00011747	6.8185e-05	1	0	NA	NA|NA|NA	0	NA	NA|NA|NA	0	NA	NA|NA|NA	0	NA	NA|NA|NA	0	NA	NA|NA|NA	0	NA	NA	NA	NA	NA	NA	NA	NA	NA	NA	NA	NA	NA	1	NA	NA	NA	NA	NA	NA
CACNA1S	calcium voltage-gated channel subunit alpha1 S	779	ENSG00000081248	HGNC:1397	Cav1.1|hypoPP	HOKPP|MHS5|CACNL1A3	01q32.1	protein-coding gene	Q13698	0.64037	0.5945	0.5945	0	0	NA	NA|NA|NA	0	NA	NA|NA|NA	0	NA	NA|NA|NA	0	NA	NA|NA|NA	0	NA	NA|NA|NA	0	NA	NA	NA	NA	NA	NA	NA	NA	NA	NA	NA	NA	NA	NA	NA	NA	NA	NA	NA	NA
CADM2	cell adhesion molecule 2	253559	ENSG00000175161	HGNC:29849	NECL3|Necl-3|SynCAM2	IGSF4D	03p12.1	protein-coding gene	Q8N3J6	0.00041524	0.00086141	0.00041524	1	0	NA	NA|NA|NA	0	NA	NA|NA|NA	0	NA	NA|NA|NA	0	NA	NA|NA|NA	0	NA	NA|NA|NA	0	NA	NA	NA	NA	NA	NA	1	1	NA	1	1	1	1	1	NA	NA	NA	NA	NA	NA
CBR4	carbonyl reductase 4	84869	ENSG00000145439	HGNC:25891	FLJ14431|SDR45C1		04q32.3	protein-coding gene	Q8N4T8	0.1734	0.25666	0.1734	0	0	NA	NA|NA|NA	0	NA	NA|NA|NA	0	NA	NA|NA|NA	0	NA	NA|NA|NA	0	NA	NA|NA|NA	0	NA	NA	NA	NA	NA	NA	NA	NA	NA	NA	NA	NA	NA	NA	NA	NA	NA	NA	NA	NA
CD160	CD160 molecule	11126	ENSG00000117281	HGNC:17013	BY55|NK1|NK28		01q21.1	protein-coding gene	O95971	0.00038915	0.00072296	0.00038915	1	0	NA	NA|NA|NA	0	NA	NA|NA|NA	0	NA	NA|NA|NA	0	NA	NA|NA|NA	0	NA	NA|NA|NA	0	NA	1	NA	NA	NA	NA	NA	NA	NA	NA	NA	NA	NA	NA	NA	NA	NA	NA	NA	NA
CDH23	cadherin related 23	64072	ENSG00000107736	HGNC:13733	CDHR23	DFNB12|USH1D	10q22.1	protein-coding gene	Q9H251	0.60906	0.6378	0.60906	0	0	NA	NA|NA|NA	0	NA	NA|NA|NA	0	NA	NA|NA|NA	0	NA	NA|NA|NA	0	NA	NA|NA|NA	0	NA	NA	NA	NA	NA	NA	NA	NA	NA	NA	NA	NA	NA	NA	NA	NA	NA	NA	NA	NA
CELSR3	cadherin EGF LAG seven-pass G-type receptor 3	1951	ENSG00000008300	HGNC:3230	MEGF2|HFMI1|FMI1|CDHF11|ADGRC3	EGFL1	03p21.31	protein-coding gene	Q9NYQ7	0.016475	0.0058223	0.0058223	0	0	NA	NA|NA|NA	0	NA	NA|NA|NA	0	NA	NA|NA|NA	0	NA	NA|NA|NA	0	NA	NA|NA|NA	0	NA	NA	NA	NA	NA	NA	NA	NA	NA	NA	NA	NA	NA	NA	NA	NA	NA	1	1	NA
CFAP99	cilia and flagella associated protein 99	402160	ENSG00000206113	HGNC:51180			04p16.3	protein-coding gene	D6REC4	1.6588e-05	0.017287	1.6588e-05	1	0	NA	NA|NA|NA	0	NA	NA|NA|NA	0	NA	NA|NA|NA	0	NA	NA|NA|NA	0	NA	NA|NA|NA	0	NA	NA	NA	NA	NA	NA	NA	NA	1	1	1	1	1	NA	NA	NA	NA	NA	NA	NA
CPNE5	copine 5	57699	ENSG00000124772	HGNC:2318	CPN5|COPN5|KIAA1599		06p21.2	protein-coding gene	Q9HCH3	0.012604	0.00074182	0.00074182	1	0	NA	NA|NA|NA	0	NA	NA|NA|NA	0	NA	NA|NA|NA	1	eQTL,CI	0|eQTLGen_cis_eQTLs|IMR90:Mesenchymal_Stem_Cell	1	eQTL	0|eQTLGen_cis_eQTLs|NA	2	1	NA	NA	NA	NA	NA	NA	NA	NA	NA	NA	NA	NA	NA	NA	NA	NA	NA	NA	NA
CSDC2	cold shock domain containing C2	27254	ENSG00000172346	HGNC:30359	PIPPin		22q13.2	protein-coding gene	Q9Y534	0.14174	0.060716	0.060716	0	1	eQTL	0|PsychENCODE_eQTLs|NA	0	NA	NA|NA|NA	0	NA	NA|NA|NA	1	eQTL	0|PsychENCODE_eQTLs|NA	0	NA	NA|NA|NA	2	1	1	NA	NA	NA	NA	NA	NA	NA	NA	NA	NA	NA	NA	NA	NA	NA	NA	NA	NA
DHRS11	dehydrogenase/reductase 11	79154	ENSG00000278535	HGNC:28639	MGC4172|SDR24C1		17q12	protein-coding gene	Q6UWP2	5.8064e-05	0.00016788	5.8064e-05	1	0	NA	NA|NA|NA	0	NA	NA|NA|NA	0	NA	NA|NA|NA	0	NA	NA|NA|NA	0	NA	NA|NA|NA	0	NA	1	NA	NA	1	NA	NA	NA	NA	1	1	1	1	1	NA	NA	NA	NA	NA	NA
DOK3	docking protein 3	79930	ENSG00000146094	HGNC:24583	FLJ22570		05q35.3	protein-coding gene	Q7L591	0.00060694	0.0021222	0.00060694	1	0	NA	NA|NA|NA	0	NA	NA|NA|NA	0	NA	NA|NA|NA	0	NA	NA|NA|NA	0	NA	NA|NA|NA	0	NA	1	NA	NA	NA	NA	NA	NA	NA	NA	NA	NA	NA	NA	NA	NA	NA	NA	NA	NA
EMB	embigin	133418	ENSG00000170571	HGNC:30465	MGC71745		05q11.1	protein-coding gene	Q6PCB8	0.0016962	0.001679	0.001679	0	0	NA	NA|NA|NA	0	NA	NA|NA|NA	0	NA	NA|NA|NA	0	NA	NA|NA|NA	0	NA	NA|NA|NA	0	NA	NA	NA	NA	NA	NA	NA	NA	NA	NA	NA	NA	NA	1	NA	NA	NA	NA	NA	NA
FAM184A	family with sequence similarity 184 member A	79632	ENSG00000111879	HGNC:20991	FLJ13942	C6orf60	06q22.31	protein-coding gene	Q8NB25	0.0086229	0.021195	0.0086229	0	0	NA	NA|NA|NA	0	NA	NA|NA|NA	0	NA	NA|NA|NA	0	NA	NA|NA|NA	0	NA	NA|NA|NA	0	NA	1	NA	NA	NA	NA	NA	NA	NA	NA	NA	NA	NA	NA	NA	NA	NA	NA	NA	NA
GGNBP2	gametogenetin binding protein 2	79893	ENSG00000278311	HGNC:19357	ZFP403|LZK1|FLJ22561|FLJ21230|DIF-3|DIF3	ZNF403	17q12	protein-coding gene	Q9H3C7	0.00014001	0.00025057	0.00014001	1	0	NA	NA|NA|NA	0	NA	NA|NA|NA	0	NA	NA|NA|NA	0	NA	NA|NA|NA	0	NA	NA|NA|NA	0	NA	1	NA	NA	NA	1	NA	NA	NA	1	1	1	1	NA	NA	NA	NA	NA	NA	NA
MECR	mitochondrial trans-2-enoyl-CoA reductase	51102	ENSG00000116353	HGNC:19691	CGI-63|NRBF1|FASN2B|ETR1		01p35.3	protein-coding gene	Q9BV79	0.00013009	3.294e-05	3.294e-05	1	1	Positional	10|NA|NA	1	Positional	1|NA|NA	1	Positional	1|NA|NA	1	Positional,eQTL	10|GTEx/v8/Adrenal_Gland:GTEx/v8/Heart_Left_Ventricle:GTEx/v8/Cells_Cultured_fibroblasts:GTEx/v8/Thyroid|IMR90:Mesendoderm:Trophoblast-like_Cell:hESC	1	Positional	1|NA|NA	4	1	NA	NA	NA	NA	NA	NA	NA	NA	NA	NA	NA	NA	NA	NA	NA	NA	NA	NA	NA
MGAM	maltase-glucoamylase	8972	ENSG00000257335	HGNC:7043	MGA		07q34	protein-coding gene	O43451	0.58788	0.96887	0.58788	0	0	NA	NA|NA|NA	0	NA	NA|NA|NA	0	NA	NA|NA|NA	0	NA	NA|NA|NA	0	NA	NA|NA|NA	0	NA	NA	NA	NA	NA	NA	NA	NA	NA	NA	NA	NA	NA	NA	NA	NA	NA	0	1	NA
MON1B	MON1 homolog B, secretory trafficking associated	22879	ENSG00000103111	HGNC:25020	SAND2|HSRG1|KIAA0872		16q23.1	protein-coding gene	Q7L1V2	0.65978	0.61772	0.61772	0	0	NA	NA|NA|NA	0	NA	NA|NA|NA	0	NA	NA|NA|NA	1	eQTL,CI	0|eQTLGen_cis_eQTLs:BIOSQTL/BIOS_eQTL_geneLevel|Mesendoderm:hESC	1	eQTL	0|eQTLGen_cis_eQTLs:BIOSQTL/BIOS_eQTL_geneLevel|NA	2	1	NA	NA	NA	NA	NA	NA	NA	NA	NA	NA	NA	NA	NA	NA	NA	NA	NA	NA	NA
NICN1	nicolin 1, tubulin polyglutamylase complex subunit	84276	ENSG00000145029	HGNC:18317	MGC12936		03p21.31	protein-coding gene	Q9BSH3	0.062373	0.026149	0.026149	0	0	NA	NA|NA|NA	0	NA	NA|NA|NA	0	NA	NA|NA|NA	0	NA	NA|NA|NA	0	NA	NA|NA|NA	0	NA	NA	NA	NA	NA	NA	1	1	NA	1	1	1	1	NA	NA	NA	NA	NA	NA	NA
NUDT17	nudix hydrolase 17	200035	ENSG00000186364	HGNC:26618	FLJ34433		01q21.1	protein-coding gene	P0C025	0.00045609	0.0013457	0.00045609	1	0	NA	NA|NA|NA	0	NA	NA|NA|NA	0	NA	NA|NA|NA	0	NA	NA|NA|NA	0	NA	NA|NA|NA	0	NA	1	NA	NA	NA	NA	NA	NA	NA	NA	NA	NA	NA	NA	NA	NA	NA	NA	NA	NA
PAPOLG	poly(A) polymerase gamma	64895	ENSG00000115421	HGNC:14982	FLJ12972		02p16.1	protein-coding gene	Q9BWT3	0.099474	0.18625	0.099474	0	0	NA	NA|NA|NA	0	NA	NA|NA|NA	0	NA	NA|NA|NA	1	CI	0|NA|Left_Ventricle:IMR90:Mesenchymal_Stem_Cell:Trophoblast-like_Cell	0	NA	NA|NA|NA	1	1	NA	NA	NA	NA	NA	NA	NA	NA	NA	NA	NA	NA	NA	NA	NA	NA	NA	NA	NA
PLEK	pleckstrin	5341	ENSG00000115956	HGNC:9070	P47		02p14	protein-coding gene	P08567	0.1018	0.075528	0.075528	0	0	NA	NA|NA|NA	0	NA	NA|NA|NA	0	NA	NA|NA|NA	0	NA	NA|NA|NA	0	NA	NA|NA|NA	0	NA	1	NA	NA	NA	NA	NA	NA	NA	NA	NA	NA	NA	NA	NA	NA	NA	NA	NA	NA
PMM1	phosphomannomutase 1	5372	ENSG00000100417	HGNC:9114	Sec53		22q13.2	protein-coding gene	Q92871	0.43094	0.077962	0.077962	0	0	NA	NA|NA|NA	0	NA	NA|NA|NA	0	NA	NA|NA|NA	1	eQTL	0|eQTLcatalogue/Lepik_2017_ge_blood:eQTLGen_cis_eQTLs:GTEx/v8/Muscle_Skeletal|NA	0	NA	NA|NA|NA	1	1	NA	1	1	NA	NA	NA	NA	NA	1	1	1	1	NA	NA	NA	NA	NA	NA	NA
PROB1	proline rich basic protein 1	389333	ENSG00000228672	HGNC:41906		C5orf65	05q31.2	protein-coding gene	E7EW31	0.00087274	0.00089443	0.00087274	1	0	NA	NA|NA|NA	0	NA	NA|NA|NA	0	NA	NA|NA|NA	0	NA	NA|NA|NA	0	NA	NA|NA|NA	0	NA	1	NA	NA	NA	NA	NA	NA	NA	NA	NA	NA	NA	NA	NA	NA	NA	NA	NA	NA
PRPF40B	pre-mRNA processing factor 40 homolog B	25766	ENSG00000110844	HGNC:25031	HYPC		12q13.12	protein-coding gene	Q6NWY9	0.052856	0.0054091	0.0054091	0	1	CI	0|NA|Promoter_anchored_loops	0	NA	NA|NA|NA	0	NA	NA|NA|NA	1	eQTL,CI	0|GTEx/v8/Thyroid|Promoter_anchored_loops:IMR90:Mesenchymal_Stem_Cell:Mesendoderm:Trophoblast-like_Cell	1	CI	0|NA|IMR90:Mesenchymal_Stem_Cell:Mesendoderm:Trophoblast-like_Cell	3	1	NA	NA	NA	NA	NA	NA	NA	NA	NA	NA	NA	NA	NA	NA	NA	NA	NA	NA	NA
RASGEF1A	RasGEF domain family member 1A	221002	ENSG00000198915	HGNC:24246	CG4853|FLJ37817		10q11.21	protein-coding gene	Q8N9B8	0.00051078	0.00057297	0.00051078	1	0	NA	NA|NA|NA	0	NA	NA|NA|NA	0	NA	NA|NA|NA	0	NA	NA|NA|NA	0	NA	NA|NA|NA	0	NA	NA	NA	NA	NA	NA	NA	NA	NA	NA	NA	NA	NA	1	NA	NA	NA	NA	NA	NA
SERPIND1	serpin family D member 1	3053	ENSG00000099937	HGNC:4838	HC-II|HLS2|HC2|D22S673	HCF2	22q11.21	protein-coding gene	P05546	0.82225	0.88635	0.82225	0	0	NA	NA|NA|NA	0	NA	NA|NA|NA	0	NA	NA|NA|NA	0	NA	NA|NA|NA	0	NA	NA|NA|NA	0	NA	NA	NA	NA	NA	NA	NA	NA	NA	NA	NA	NA	NA	NA	NA	NA	NA	NA	NA	NA
SIGLEC14	sialic acid binding Ig like lectin 14	100049587	ENSG00000254415	HGNC:32926			19q13.41	protein-coding gene	Q08ET2	NA	0.068156	0.068156	0	0	NA	NA|NA|NA	0	NA	NA|NA|NA	0	NA	NA|NA|NA	1	eQTL	0|eQTLGen_cis_eQTLs|NA	0	NA	NA|NA|NA	1	1	NA	NA	NA	NA	NA	NA	NA	NA	NA	NA	NA	NA	NA	NA	NA	NA	NA	NA	NA
SLC10A4	solute carrier family 10 member 4	201780	ENSG00000145248	HGNC:22980	MGC29802		04p11	protein-coding gene	Q96EP9	0.0010729	0.010152	0.0010729	0	0	NA	NA|NA|NA	0	NA	NA|NA|NA	0	NA	NA|NA|NA	0	NA	NA|NA|NA	0	NA	NA|NA|NA	0	NA	NA	NA	NA	1	NA	NA	NA	NA	1	1	1	1	1	NA	NA	NA	NA	NA	NA
SLITRK1	SLIT and NTRK like family member 1	114798	ENSG00000178235	HGNC:20297	KIAA1910	LRRC12	13q31.1	protein-coding gene	Q96PX8	0.24902	0.41334	0.24902	0	0	NA	NA|NA|NA	0	NA	NA|NA|NA	0	NA	NA|NA|NA	0	NA	NA|NA|NA	0	NA	NA|NA|NA	0	NA	NA	NA	NA	NA	NA	NA	NA	NA	NA	NA	NA	NA	NA	1	NA	NA	NA	NA	NA
SORCS3	sortilin related VPS10 domain containing receptor 3	22986	ENSG00000156395	HGNC:16699	KIAA1059|SORCS		10q25.1	protein-coding gene	Q9UPU3	0.34318	0.44955	0.34318	0	0	NA	NA|NA|NA	0	NA	NA|NA|NA	0	NA	NA|NA|NA	0	NA	NA|NA|NA	0	NA	NA|NA|NA	0	NA	NA	1	1	NA	NA	1	1	NA	2	1	2	1	NA	NA	NA	NA	NA	NA	NA
TEF	TEF transcription factor, PAR bZIP family member	7008	ENSG00000167074	HGNC:11722	KIAA1655		22q13.2	protein-coding gene	Q10587	0.01384	0.0083102	0.0083102	0	0	NA	NA|NA|NA	0	NA	NA|NA|NA	0	NA	NA|NA|NA	1	eQTL	0|eQTLcatalogue/GEUVADIS_ge_LCL:eQTLcatalogue/TwinsUK_ge_blood:eQTLcatalogue/TwinsUK_ge_LCL:eQTLGen_cis_eQTLs:BIOSQTL/BIOS_eQTL_geneLevel:GTEx/v8/Whole_Blood|NA	1	eQTL	0|eQTLcatalogue/TwinsUK_ge_LCL:eQTLGen_cis_eQTLs:BIOSQTL/BIOS_eQTL_geneLevel|NA	2	1	NA	1	1	NA	NA	NA	NA	NA	1	1	1	1	NA	NA	NA	NA	NA	NA	NA
TLK1	tousled like kinase 1	9874	ENSG00000198586	HGNC:11841	KIAA0137|PKU-BETA		02q31.1	protein-coding gene	Q9UKI8	0.00088776	0.0014249	0.00088776	1	0	NA	NA|NA|NA	0	NA	NA|NA|NA	0	NA	NA|NA|NA	0	NA	NA|NA|NA	0	NA	NA|NA|NA	0	NA	1	NA	NA	NA	NA	NA	NA	NA	NA	NA	NA	NA	NA	NA	NA	NA	NA	NA	NA
TMCC2	transmembrane and coiled-coil domain family 2	9911	ENSG00000133069	HGNC:24239	HUCEP11|FLJ38497		01q32.1	protein-coding gene	O75069	0.0051257	0.013462	0.0051257	0	0	NA	NA|NA|NA	0	NA	NA|NA|NA	0	NA	NA|NA|NA	0	NA	NA|NA|NA	0	NA	NA|NA|NA	0	NA	1	NA	NA	NA	NA	NA	NA	NA	NA	NA	NA	NA	1	NA	NA	NA	NA	NA	NA
TTC27	tetratricopeptide repeat domain 27	55622	ENSG00000018699	HGNC:25986	FLJ20272		02p22.3	protein-coding gene	Q6P3X3	0.062256	0.1009	0.062256	0	0	NA	NA|NA|NA	0	NA	NA|NA|NA	0	NA	NA|NA|NA	0	NA	NA|NA|NA	0	NA	NA|NA|NA	0	NA	NA	NA	NA	NA	NA	NA	NA	NA	NA	NA	NA	NA	NA	NA	NA	NA	NA	NA	NA
URAD	ureidoimidazoline (2-oxo-4-hydroxy-4-carboxy-5-) decarboxylase	646625	ENSG00000183463	HGNC:17785		PRHOXNB	13q12.2	protein-coding gene	A6NGE7	0.12032	2.6847e-06	2.6847e-06	1	1	eQTL	0|PsychENCODE_eQTLs:GTEx/v8/Brain_Cerebellum|NA	1	eQTL	0|GTEx/v8/Brain_Cerebellum|NA	0	NA	NA|NA|NA	1	eQTL	0|PsychENCODE_eQTLs:GTEx/v8/Brain_Cerebellum|NA	1	eQTL	0|GTEx/v8/Brain_Cerebellum|NA	4	1	NA	NA	NA	NA	NA	NA	NA	NA	NA	NA	NA	NA	NA	NA	NA	NA	NA	NA	NA
ZNF382	zinc finger protein 382	84911	ENSG00000161298	HGNC:17409	FLJ14686|KS1		19q13.12	protein-coding gene	Q96SR6	0.00043628	0.00063975	0.00043628	1	0	NA	NA|NA|NA	0	NA	NA|NA|NA	0	NA	NA|NA|NA	0	NA	NA|NA|NA	0	NA	NA|NA|NA	0	NA	NA	NA	NA	NA	NA	NA	NA	NA	NA	NA	NA	NA	1	NA	NA	NA	NA	NA	NA
ZNF529	zinc finger protein 529	57711	ENSG00000186020	HGNC:29328	KIAA1615		19q13.12	protein-coding gene	Q6P280	0.00090379	0.00069673	0.00069673	1	0	NA	NA|NA|NA	0	NA	NA|NA|NA	0	NA	NA|NA|NA	0	NA	NA|NA|NA	0	NA	NA|NA|NA	0	NA	1	NA	NA	NA	NA	NA	NA	NA	NA	NA	NA	NA	NA	NA	NA	NA	NA	NA	NA
ZNF577	zinc finger protein 577	84765	ENSG00000161551	HGNC:28673	MGC4400		19q13.41	protein-coding gene	Q9BSK1	0.25024	0.054456	0.054456	0	0	NA	NA|NA|NA	0	NA	NA|NA|NA	0	NA	NA|NA|NA	1	eQTL	0|GTEx/v8/Artery_Aorta:GTEx/v8/Esophagus_Muscularis:GTEx/v8/Thyroid|NA	0	NA	NA|NA|NA	1	1	NA	NA	NA	NA	NA	NA	NA	1	1	1	1	1	NA	NA	NA	NA	NA	NA	NA
ABCA7	ATP binding cassette subfamily A member 7	10347	ENSG00000064687	HGNC:37	ABCX		19p13.3	protein-coding gene	Q8IZY2	0.13256	0.091282	0.091282	0	0	NA	NA|NA|NA	0	NA	NA|NA|NA	0	NA	NA|NA|NA	0	NA	NA|NA|NA	0	NA	NA|NA|NA	0	NA	NA	NA	NA	NA	NA	NA	NA	NA	NA	NA	NA	NA	NA	NA	NA	NA	NA	NA	NA
ABCC1	ATP binding cassette subfamily C member 1	4363	ENSG00000103222	HGNC:51	GS-X	MRP|MRP1	16p13.11	protein-coding gene	P33527	0.6827	0.58019	0.58019	0	0	NA	NA|NA|NA	0	NA	NA|NA|NA	0	NA	NA|NA|NA	0	NA	NA|NA|NA	0	NA	NA|NA|NA	0	NA	NA	NA	NA	NA	NA	NA	NA	NA	NA	NA	NA	NA	NA	NA	NA	NA	NA	NA	NA
ABCG8	ATP binding cassette subfamily G member 8	64241	ENSG00000143921	HGNC:13887	GBD4		02p21	protein-coding gene	Q9H221	0.041462	0.0031029	0.0031029	0	1	Positional	2|NA|NA	0	NA	NA|NA|NA	0	NA	NA|NA|NA	1	Positional	2|NA|NA	0	NA	NA|NA|NA	2	1	NA	NA	NA	NA	NA	NA	NA	NA	NA	NA	NA	NA	NA	NA	NA	NA	NA	NA	NA
ABHD16A	abhydrolase domain containing 16A, phospholipase	7920	ENSG00000204427	HGNC:13921	NG26|D6S82E	BAT5	06p21.33	protein-coding gene	O95870	0.00056055	0.0024252	0.00056055	1	0	NA	NA|NA|NA	0	NA	NA|NA|NA	0	NA	NA|NA|NA	0	NA	NA|NA|NA	0	NA	NA|NA|NA	0	NA	NA	NA	NA	NA	NA	NA	NA	NA	NA	NA	NA	NA	NA	NA	NA	NA	NA	NA	NA
ABI2	abl interactor 2	10152	ENSG00000138443	HGNC:24011	ABI-2|AIP-1|ABI2B|AblBP3|argBPIA|SSH3BP2		02q33.2	protein-coding gene	Q9NYB9	0.11237	0.13819	0.11237	0	0	NA	NA|NA|NA	0	NA	NA|NA|NA	0	NA	NA|NA|NA	0	NA	NA|NA|NA	0	NA	NA|NA|NA	0	NA	NA	NA	NA	NA	NA	NA	NA	NA	NA	NA	NA	NA	NA	NA	NA	NA	NA	NA	NA
ACAA1	acetyl-CoA acyltransferase 1	30	ENSG00000060971	HGNC:82			03p22.2	protein-coding gene	P09110	0.76077	0.92228	0.76077	0	0	NA	NA|NA|NA	0	NA	NA|NA|NA	0	NA	NA|NA|NA	0	NA	NA|NA|NA	0	NA	NA|NA|NA	0	NA	NA	NA	NA	NA	NA	NA	NA	NA	NA	NA	NA	NA	NA	NA	NA	NA	NA	NA	NA
ACTR8	actin related protein 8	93973	ENSG00000113812	HGNC:14672	INO80N|ARP8		03p21.1	protein-coding gene	Q9H981	0.46477	0.43978	0.43978	0	0	NA	NA|NA|NA	0	NA	NA|NA|NA	0	NA	NA|NA|NA	1	CI	0|NA|IMR90	0	NA	NA|NA|NA	1	1	NA	NA	NA	NA	NA	NA	NA	NA	NA	NA	NA	NA	NA	NA	NA	NA	NA	NA	NA
ADCY2	adenylate cyclase 2	108	ENSG00000078295	HGNC:233	HBAC2|KIAA1060|AC2		05p15.31	protein-coding gene	Q08462	0.24314	0.39303	0.24314	0	0	NA	NA|NA|NA	0	NA	NA|NA|NA	0	NA	NA|NA|NA	0	NA	NA|NA|NA	0	NA	NA|NA|NA	0	NA	NA	NA	NA	NA	NA	NA	NA	NA	NA	NA	NA	NA	NA	NA	NA	NA	0	1	NA
ADM	adrenomedullin	133	ENSG00000148926	HGNC:259	AM		11p15.4	protein-coding gene	P35318	NA	0.9644	0.9644	0	0	NA	NA|NA|NA	0	NA	NA|NA|NA	0	NA	NA|NA|NA	0	NA	NA|NA|NA	0	NA	NA|NA|NA	0	NA	NA	NA	NA	NA	NA	NA	NA	NA	NA	NA	NA	NA	NA	NA	NA	NA	NA	NA	NA
ADRM1	ADRM1 26S proteasome ubiquitin receptor	11047	ENSG00000130706	HGNC:15759	GP110|Rpn13|ARM1|PSMD16		20q13.33	protein-coding gene	Q16186	0.0016356	0.00017333	0.00017333	1	0	NA	NA|NA|NA	0	NA	NA|NA|NA	0	NA	NA|NA|NA	0	NA	NA|NA|NA	0	NA	NA|NA|NA	0	NA	NA	NA	NA	NA	NA	NA	NA	NA	NA	NA	NA	NA	NA	NA	NA	NA	NA	NA	NA
AHCY	adenosylhomocysteinase	191	ENSG00000101444	HGNC:343	SAHH		20q11.22	protein-coding gene	P23526	0.65726	0.29127	0.29127	0	0	NA	NA|NA|NA	0	NA	NA|NA|NA	0	NA	NA|NA|NA	0	NA	NA|NA|NA	0	NA	NA|NA|NA	0	NA	NA	NA	NA	NA	NA	NA	NA	NA	NA	NA	NA	NA	NA	NA	NA	NA	NA	NA	NA
AKAP9	A-kinase anchoring protein 9	10142	ENSG00000127914	HGNC:379	KIAA0803|AKAP350|AKAP450|CG-NAP|YOTIAO|HYPERION|PRKA9|MU-RMS-40.16A|PPP1R45|LQT11		07q21.2	protein-coding gene	Q99996	0.30272	0.35565	0.30272	0	0	NA	NA|NA|NA	0	NA	NA|NA|NA	0	NA	NA|NA|NA	0	NA	NA|NA|NA	0	NA	NA|NA|NA	0	NA	NA	NA	NA	NA	NA	NA	NA	NA	NA	NA	NA	NA	NA	NA	NA	NA	NA	NA	NA
ALDH7A1	aldehyde dehydrogenase 7 family member A1	501	ENSG00000164904	HGNC:877	EPD|PDE	ATQ1	05q23.2	protein-coding gene	P49419	0.6968	0.50567	0.50567	0	0	NA	NA|NA|NA	0	NA	NA|NA|NA	0	NA	NA|NA|NA	0	NA	NA|NA|NA	0	NA	NA|NA|NA	0	NA	NA	NA	NA	NA	NA	NA	NA	NA	NA	NA	NA	NA	NA	NA	NA	NA	NA	NA	NA
ANK3	ankyrin 3	288	ENSG00000151150	HGNC:494			10q21.2	protein-coding gene	Q12955	0.62602	0.56152	0.56152	0	0	NA	NA|NA|NA	0	NA	NA|NA|NA	0	NA	NA|NA|NA	0	NA	NA|NA|NA	0	NA	NA|NA|NA	0	NA	NA	NA	NA	NA	NA	NA	NA	NA	NA	NA	NA	NA	NA	NA	NA	NA	0	1	NA
AP3B2	adaptor related protein complex 3 subunit beta 2	8120	ENSG00000103723	HGNC:567	NAPTB		15q25.2	protein-coding gene	Q13367	0.041108	0.030753	0.030753	0	1	eQTL	0|CMC_SVA_cis|NA	0	NA	NA|NA|NA	0	NA	NA|NA|NA	1	eQTL	0|eQTLGen_cis_eQTLs:CMC_SVA_cis|NA	1	eQTL	0|eQTLGen_cis_eQTLs|NA	3	1	NA	NA	NA	NA	NA	NA	NA	NA	NA	NA	NA	NA	NA	NA	NA	NA	NA	NA	NA
ARHGAP26	Rho GTPase activating protein 26	23092	ENSG00000145819	HGNC:17073	GRAF|KIAA0621|OPHN1L|OPHN1L1		05q31.3	protein-coding gene	Q9UNA1	0.19933	0.06926	0.06926	0	0	NA	NA|NA|NA	0	NA	NA|NA|NA	0	NA	NA|NA|NA	0	NA	NA|NA|NA	0	NA	NA|NA|NA	0	NA	NA	NA	NA	NA	NA	NA	NA	NA	NA	NA	NA	NA	NA	NA	NA	NA	0	1	NA
ASB3	ankyrin repeat and SOCS box containing 3	51130	ENSG00000115239	HGNC:16013	ASB-3		02p16.2	protein-coding gene	Q9Y575	0.021705	0.025752	0.021705	0	0	NA	NA|NA|NA	0	NA	NA|NA|NA	0	NA	NA|NA|NA	0	NA	NA|NA|NA	0	NA	NA|NA|NA	0	NA	NA	NA	NA	1	NA	NA	NA	NA	1	1	1	1	NA	NA	NA	NA	NA	NA	NA
ATN1	atrophin 1	1822	ENSG00000111676	HGNC:3033	B37	D12S755E|DRPLA	12p13.31	protein-coding gene	P54259	0.39169	0.23675	0.23675	0	0	NA	NA|NA|NA	0	NA	NA|NA|NA	0	NA	NA|NA|NA	0	NA	NA|NA|NA	0	NA	NA|NA|NA	0	NA	NA	NA	NA	NA	NA	NA	NA	NA	NA	NA	NA	NA	NA	NA	NA	NA	NA	NA	NA
ATP5IF1	ATP synthase inhibitory factor subunit 1	93974	ENSG00000130770	HGNC:871	ATPI|IP|ATPIP|MGC1167|MGC8898	ATPIF1	01p35.3	protein-coding gene	Q9UII2	0.32041	0.54332	0.32041	0	0	NA	NA|NA|NA	0	NA	NA|NA|NA	0	NA	NA|NA|NA	1	CI	0|NA|Left_Ventricle	0	NA	NA|NA|NA	1	1	NA	NA	NA	NA	NA	NA	NA	NA	NA	NA	NA	NA	NA	NA	NA	NA	NA	NA	NA
BAG5	BAG cochaperone 5	9529	ENSG00000166170	HGNC:941			14q32.33	protein-coding gene	Q9UL15	0.17819	0.026558	0.026558	0	0	NA	NA|NA|NA	0	NA	NA|NA|NA	0	NA	NA|NA|NA	0	NA	NA|NA|NA	0	NA	NA|NA|NA	0	NA	NA	1	1	NA	NA	NA	NA	NA	1	1	1	1	NA	NA	NA	NA	NA	NA	NA
BHLHE40	basic helix-loop-helix family member e40	8553	ENSG00000134107	HGNC:1046	DEC1|SHARP2|Clast5	STRA13|BHLHB2	03p26.1	protein-coding gene	O14503	0.70292	0.27291	0.27291	0	0	NA	NA|NA|NA	0	NA	NA|NA|NA	0	NA	NA|NA|NA	0	NA	NA|NA|NA	0	NA	NA|NA|NA	0	NA	NA	NA	NA	NA	NA	NA	NA	NA	NA	NA	NA	NA	NA	NA	NA	NA	NA	NA	NA
BMS1	BMS1 ribosome biogenesis factor	9790	ENSG00000165733	HGNC:23505	KIAA0187	BMS1L	10q11.21	protein-coding gene	Q14692	0.79544	0.58015	0.58015	0	0	NA	NA|NA|NA	0	NA	NA|NA|NA	0	NA	NA|NA|NA	1	CI	0|NA|IMR90:Mesenchymal_Stem_Cell:Mesendoderm:Trophoblast-like_Cell:hESC	0	NA	NA|NA|NA	1	1	NA	NA	NA	NA	NA	NA	NA	NA	NA	NA	NA	NA	NA	NA	NA	NA	NA	NA	NA
CACNA1D	calcium voltage-gated channel subunit alpha1 D	776	ENSG00000157388	HGNC:1391	Cav1.3|CACH3|CACN4	CCHL1A2|CACNL1A2	03p21.1	protein-coding gene	Q01668	0.58506	0.6147	0.58506	0	0	NA	NA|NA|NA	0	NA	NA|NA|NA	0	NA	NA|NA|NA	0	NA	NA|NA|NA	0	NA	NA|NA|NA	0	NA	NA	0	1	NA	NA	NA	NA	NA	0	NA	1	1	NA	NA	NA	NA	NA	NA	NA
CAPN6	calpain 6	827	ENSG00000077274	HGNC:1483	CAPNX|CalpM|CANPX		Xq23	protein-coding gene	Q9Y6Q1	NA	NA	NA	NA	0	NA	NA|NA|NA	0	NA	NA|NA|NA	0	NA	NA|NA|NA	0	NA	NA|NA|NA	0	NA	NA|NA|NA	0	NA	NA	NA	NA	NA	NA	NA	NA	NA	NA	NA	NA	NA	NA	NA	NA	NA	NA	NA	NA
CASP8	caspase 8	841	ENSG00000064012	HGNC:1509	MCH5|MACH|FLICE|Casp-8		02q33.1	protein-coding gene	Q14790	0.77444	0.92588	0.77444	0	0	NA	NA|NA|NA	0	NA	NA|NA|NA	0	NA	NA|NA|NA	0	NA	NA|NA|NA	0	NA	NA|NA|NA	0	NA	NA	NA	NA	NA	NA	NA	NA	NA	NA	NA	NA	NA	NA	NA	NA	NA	NA	NA	NA
CCDC66	coiled-coil domain containing 66	285331	ENSG00000180376	HGNC:27709	DKFZp686C0433		03p14.3	protein-coding gene	A2RUB6	0.56992	0.56557	0.56557	0	1	eQTL	0|PsychENCODE_eQTLs|NA	1	eQTL	0|PsychENCODE_eQTLs|NA	0	NA	NA|NA|NA	1	eQTL	0|eQTLcatalogue/Lepik_2017_ge_blood:PsychENCODE_eQTLs:eQTLGen_cis_eQTLs|NA	1	eQTL	0|eQTLcatalogue/Lepik_2017_ge_blood:PsychENCODE_eQTLs:eQTLGen_cis_eQTLs|NA	4	1	NA	NA	NA	NA	NA	NA	NA	NA	NA	NA	NA	NA	NA	NA	NA	NA	NA	NA	NA
CD302	CD302 molecule	9936	ENSG00000241399	HGNC:30843	DCL-1|KIAA0022|BIMLEC|CLEC13A		02q24.2	protein-coding gene	Q8IX05	0.030601	0.016704	0.016704	0	1	Positional	15|NA|NA	1	Positional	1|NA|NA	1	Positional	1|NA|NA	1	Positional,eQTL	15|eQTLcatalogue/GEUVADIS_ge_LCL:GTEx/v8/Adipose_Subcutaneous:GTEx/v8/Artery_Aorta:GTEx/v8/Liver:GTEx/v8/Cells_Cultured_fibroblasts|Mesenchymal_Stem_Cell	1	Positional,eQTL	1|GTEx/v8/Adipose_Subcutaneous:GTEx/v8/Cells_Cultured_fibroblasts|NA	4	1	NA	NA	NA	NA	NA	NA	NA	NA	NA	NA	NA	NA	NA	NA	NA	NA	NA	NA	NA
CD47	CD47 molecule	961	ENSG00000196776	HGNC:1682	IAP|OA3	MER6	03q13.12	protein-coding gene	Q08722	0.0042522	0.0023186	0.0023186	0	0	NA	NA|NA|NA	0	NA	NA|NA|NA	0	NA	NA|NA|NA	0	NA	NA|NA|NA	0	NA	NA|NA|NA	0	NA	NA	NA	NA	NA	1	NA	NA	NA	1	1	1	1	NA	NA	NA	NA	NA	NA	NA
CDK2AP1	cyclin dependent kinase 2 associated protein 1	8099	ENSG00000111328	HGNC:14002	DORC1|doc-1|DOC1|ST19|p12DOC-1		12q24.31	protein-coding gene	O14519	0.0063982	0.0013551	0.0013551	0	0	NA	NA|NA|NA	0	NA	NA|NA|NA	0	NA	NA|NA|NA	0	NA	NA|NA|NA	0	NA	NA|NA|NA	0	NA	1	NA	NA	NA	NA	NA	NA	NA	NA	NA	NA	NA	NA	NA	NA	NA	NA	NA	NA
CDX2	caudal type homeobox 2	1045	ENSG00000165556	HGNC:1806		CDX3	13q12.2	protein-coding gene	Q99626	0.18688	3.9377e-05	3.9377e-05	1	0	NA	NA|NA|NA	0	NA	NA|NA|NA	0	NA	NA|NA|NA	1	CI	0|NA|EP_correlation_cell_type_oneway	0	NA	NA|NA|NA	1	1	NA	NA	NA	NA	NA	NA	NA	NA	NA	NA	NA	NA	NA	NA	NA	NA	NA	NA	NA
CENPJ	centromere protein J	55835	ENSG00000151849	HGNC:17272	CPAP|BM032|LAP|LIP1|Sas-4|SASS4|SCKL4	MCPH6	13q12.12-q12.13	protein-coding gene	Q9HC77	0.92648	0.9057	0.9057	0	0	NA	NA|NA|NA	0	NA	NA|NA|NA	0	NA	NA|NA|NA	0	NA	NA|NA|NA	0	NA	NA|NA|NA	0	NA	NA	NA	NA	NA	NA	NA	NA	NA	NA	NA	NA	NA	NA	NA	NA	NA	NA	NA	NA
CEP85L	centrosomal protein 85 like	387119	ENSG00000111860	HGNC:21638	NY-BR-15|bA57K17.2	C6orf204	06q22.31	protein-coding gene	Q5SZL2	0.72986	0.52013	0.52013	0	0	NA	NA|NA|NA	0	NA	NA|NA|NA	0	NA	NA|NA|NA	0	NA	NA|NA|NA	0	NA	NA|NA|NA	0	NA	NA	NA	NA	NA	NA	NA	NA	NA	NA	NA	NA	NA	NA	NA	NA	NA	NA	NA	NA
CERS5	ceramide synthase 5	91012	ENSG00000139624	HGNC:23749	Trh4|MGC45411|FLJ25304	LASS5	12q13.12	protein-coding gene	Q8N5B7	0.46012	0.43791	0.43791	0	0	NA	NA|NA|NA	0	NA	NA|NA|NA	0	NA	NA|NA|NA	1	eQTL	0|GTEx/v8/Esophagus_Mucosa|NA	0	NA	NA|NA|NA	1	1	NA	NA	NA	NA	NA	NA	NA	NA	NA	NA	NA	NA	NA	NA	NA	NA	NA	NA	NA
CHDH	choline dehydrogenase	55349	ENSG00000016391	HGNC:24288			03p21.1	protein-coding gene	Q8NE62	0.13095	0.40801	0.13095	0	0	NA	NA|NA|NA	0	NA	NA|NA|NA	0	NA	NA|NA|NA	1	CI	0|NA|IMR90	0	NA	NA|NA|NA	1	1	NA	NA	NA	NA	NA	NA	NA	NA	NA	NA	NA	NA	NA	NA	NA	NA	NA	NA	NA
CHRNA7	cholinergic receptor nicotinic alpha 7 subunit	1139	ENSG00000175344	HGNC:1960			15q13.3	protein-coding gene	P36544	0.73471	0.82888	0.73471	0	0	NA	NA|NA|NA	0	NA	NA|NA|NA	0	NA	NA|NA|NA	0	NA	NA|NA|NA	0	NA	NA|NA|NA	0	NA	NA	NA	NA	NA	NA	NA	NA	NA	NA	NA	NA	NA	NA	NA	NA	NA	NA	NA	NA
CHRNB4	cholinergic receptor nicotinic beta 4 subunit	1143	ENSG00000117971	HGNC:1964			15q25.1	protein-coding gene	P30926	0.059774	0.042868	0.042868	0	0	NA	NA|NA|NA	0	NA	NA|NA|NA	0	NA	NA|NA|NA	0	NA	NA|NA|NA	0	NA	NA|NA|NA	0	NA	NA	0	1	NA	NA	NA	NA	NA	0	NA	1	1	NA	NA	NA	NA	NA	NA	NA
CIBAR1	CBY1 interacting BAR domain containing 1	137392	ENSG00000188343	HGNC:30452	FLJ38979|BARMR1	FAM92A1|FAM92A	08q22.1	protein-coding gene	A1XBS5	0.10837	0.063591	0.063591	0	0	NA	NA|NA|NA	0	NA	NA|NA|NA	0	NA	NA|NA|NA	1	CI	0|NA|Mesendoderm	0	NA	NA|NA|NA	1	1	NA	NA	NA	NA	NA	NA	NA	NA	NA	NA	NA	NA	NA	NA	NA	NA	NA	NA	NA
CLCA1	chloride channel accessory 1	1179	ENSG00000016490	HGNC:2015	CaCC|CLCRG1		01p22.3	protein-coding gene	A8K7I4	0.7968	0.76063	0.76063	0	0	NA	NA|NA|NA	0	NA	NA|NA|NA	0	NA	NA|NA|NA	1	CI	0|NA|IMR90:Mesendoderm	1	CI	0|NA|IMR90:Mesendoderm	2	1	NA	NA	NA	NA	NA	NA	NA	NA	NA	NA	NA	NA	NA	NA	NA	NA	NA	NA	NA
CLCA2	chloride channel accessory 2	9635	ENSG00000137975	HGNC:2016	CLCRG2		01p22.3	protein-coding gene	Q9UQC9	0.63247	0.75936	0.63247	0	0	NA	NA|NA|NA	0	NA	NA|NA|NA	0	NA	NA|NA|NA	1	CI	0|NA|Mesendoderm	1	CI	0|NA|Mesendoderm	2	1	NA	NA	NA	NA	NA	NA	NA	NA	NA	NA	NA	NA	NA	NA	NA	NA	NA	NA	NA
CLTCL1	clathrin heavy chain like 1	8218	ENSG00000070371	HGNC:2093	CLTD|CLH22|CHC22	CLTCL	22q11.21	protein-coding gene	P53675	0.99869	0.95812	0.95812	0	0	NA	NA|NA|NA	0	NA	NA|NA|NA	0	NA	NA|NA|NA	0	NA	NA|NA|NA	0	NA	NA|NA|NA	0	NA	NA	NA	NA	NA	NA	NA	NA	NA	NA	NA	NA	NA	NA	NA	NA	NA	NA	NA	NA
COL4A2	collagen type IV alpha 2 chain	1284	ENSG00000134871	HGNC:2203	FLJ22259|DKFZp686I14213		13q34	protein-coding gene	P08572	0.91409	0.9838	0.91409	0	0	NA	NA|NA|NA	0	NA	NA|NA|NA	0	NA	NA|NA|NA	0	NA	NA|NA|NA	0	NA	NA|NA|NA	0	NA	NA	NA	NA	NA	NA	NA	NA	NA	NA	NA	NA	NA	NA	NA	NA	NA	NA	NA	NA
COL5A1	collagen type V alpha 1 chain	1289	ENSG00000130635	HGNC:2209			09q34.3	protein-coding gene	P20908	0.036405	0.05479	0.036405	0	0	NA	NA|NA|NA	0	NA	NA|NA|NA	0	NA	NA|NA|NA	0	NA	NA|NA|NA	0	NA	NA|NA|NA	0	NA	NA	NA	NA	NA	NA	NA	NA	NA	NA	NA	NA	NA	NA	NA	NA	NA	NA	NA	NA
COL6A3	collagen type VI alpha 3 chain	1293	ENSG00000163359	HGNC:2213			02q37.3	protein-coding gene	P12111	0.11918	0.37174	0.11918	0	0	NA	NA|NA|NA	0	NA	NA|NA|NA	0	NA	NA|NA|NA	0	NA	NA|NA|NA	0	NA	NA|NA|NA	0	NA	NA	NA	NA	NA	NA	NA	NA	NA	NA	NA	NA	NA	NA	NA	NA	NA	NA	NA	NA
COMT	catechol-O-methyltransferase	1312	ENSG00000093010	HGNC:2228			22q11.21	protein-coding gene	P21964	0.42057	0.64578	0.42057	0	0	NA	NA|NA|NA	0	NA	NA|NA|NA	0	NA	NA|NA|NA	0	NA	NA|NA|NA	0	NA	NA|NA|NA	0	NA	NA	NA	NA	NA	NA	NA	NA	NA	NA	NA	NA	NA	NA	NA	NA	NA	NA	NA	NA
COP1	COP1 E3 ubiquitin ligase	64326	ENSG00000143207	HGNC:17440	FLJ10416|RNF200|FAP78|CFAP78	RFWD2	01q25.1-q25.2	protein-coding gene	Q8NHY2	0.057791	0.083703	0.057791	0	0	NA	NA|NA|NA	0	NA	NA|NA|NA	0	NA	NA|NA|NA	0	NA	NA|NA|NA	0	NA	NA|NA|NA	0	NA	NA	NA	NA	NA	NA	NA	NA	NA	NA	NA	NA	NA	NA	NA	NA	NA	NA	NA	NA
COPS9	COP9 signalosome subunit 9	150678	ENSG00000172428	HGNC:21314	CSNAP	MYEOV2	02q37.3	protein-coding gene	Q8WXC6	0.98263	0.73842	0.73842	0	0	NA	NA|NA|NA	0	NA	NA|NA|NA	0	NA	NA|NA|NA	0	NA	NA|NA|NA	0	NA	NA|NA|NA	0	NA	NA	NA	NA	NA	NA	NA	NA	NA	NA	NA	NA	NA	NA	NA	NA	NA	NA	NA	NA
CRHR1	corticotropin releasing hormone receptor 1	1394	ENSG00000120088	HGNC:2357	CRF-R|CRF1	CRHR	17q21.31	protein-coding gene	P34998	0.012087	0.011965	0.011965	0	0	NA	NA|NA|NA	0	NA	NA|NA|NA	0	NA	NA|NA|NA	0	NA	NA|NA|NA	0	NA	NA|NA|NA	0	NA	NA	NA	NA	NA	NA	1	1	NA	1	1	1	1	NA	NA	NA	NA	NA	NA	NA
CRKL	CRK like proto-oncogene, adaptor protein	1399	ENSG00000099942	HGNC:2363			22q11.21	protein-coding gene	P46109	0.86167	0.9358	0.86167	0	0	NA	NA|NA|NA	0	NA	NA|NA|NA	0	NA	NA|NA|NA	0	NA	NA|NA|NA	0	NA	NA|NA|NA	0	NA	NA	NA	NA	NA	NA	NA	NA	NA	NA	NA	NA	NA	NA	NA	NA	NA	NA	NA	NA
CTNNA3	catenin alpha 3	29119	ENSG00000183230	HGNC:2511	VR22|MGC26194		10q21.3	protein-coding gene	Q9UI47	0.65864	0.6886	0.65864	0	0	NA	NA|NA|NA	0	NA	NA|NA|NA	0	NA	NA|NA|NA	0	NA	NA|NA|NA	0	NA	NA|NA|NA	0	NA	NA	NA	NA	NA	NA	NA	NA	NA	NA	NA	NA	NA	NA	NA	NA	NA	NA	NA	NA
CX3CL1	C-X3-C motif chemokine ligand 1	6376	ENSG00000006210	HGNC:10647	NTN|C3Xkine|ABCD-3|CXC3C|CXC3	SCYD1	16q21	protein-coding gene	P78423	0.23945	0.54213	0.23945	0	0	NA	NA|NA|NA	0	NA	NA|NA|NA	0	NA	NA|NA|NA	0	NA	NA|NA|NA	0	NA	NA|NA|NA	0	NA	NA	NA	NA	NA	NA	NA	NA	NA	NA	NA	NA	NA	NA	NA	NA	NA	NA	NA	NA
DAGLA	diacylglycerol lipase alpha	747	ENSG00000134780	HGNC:1165	KIAA0659|NSDDR|DAGLALPHA	C11orf11	11q12.2	protein-coding gene	Q9Y4D2	0.14145	0.24842	0.14145	0	0	NA	NA|NA|NA	0	NA	NA|NA|NA	0	NA	NA|NA|NA	0	NA	NA|NA|NA	0	NA	NA|NA|NA	0	NA	NA	NA	NA	NA	NA	NA	NA	NA	NA	NA	NA	NA	NA	NA	NA	NA	NA	NA	NA
DBN1	drebrin 1	1627	ENSG00000113758	HGNC:2695		D0S117E	05q35.3	protein-coding gene	Q16643	0.20421	0.00032589	0.00032589	1	0	NA	NA|NA|NA	0	NA	NA|NA|NA	0	NA	NA|NA|NA	0	NA	NA|NA|NA	0	NA	NA|NA|NA	0	NA	NA	NA	NA	NA	NA	NA	NA	NA	NA	NA	NA	NA	NA	NA	NA	NA	NA	NA	NA
DCAF1	DDB1 and CUL4 associated factor 1	9730	ENSG00000145041	HGNC:30911	KIAA0800|MGC102804	VPRBP	03p21.2	protein-coding gene	Q9Y4B6	0.24786	0.17728	0.17728	0	0	NA	NA|NA|NA	0	NA	NA|NA|NA	0	NA	NA|NA|NA	0	NA	NA|NA|NA	0	NA	NA|NA|NA	0	NA	NA	NA	NA	NA	NA	NA	NA	NA	NA	NA	NA	NA	NA	NA	NA	NA	NA	NA	NA
DGCR6	DiGeorge syndrome critical region gene 6	8214	ENSG00000183628	HGNC:2846			22q11.21	protein-coding gene	Q14129	0.599	0.7858	0.599	0	0	NA	NA|NA|NA	0	NA	NA|NA|NA	0	NA	NA|NA|NA	0	NA	NA|NA|NA	0	NA	NA|NA|NA	0	NA	NA	NA	NA	NA	NA	NA	NA	NA	NA	NA	NA	NA	NA	NA	NA	NA	NA	NA	NA
DGCR8	DGCR8 microprocessor complex subunit	54487	ENSG00000128191	HGNC:2847	DGCRK6|Gy1|pasha	C22orf12	22q11.21	protein-coding gene	Q8WYQ5	0.62494	0.81815	0.62494	0	0	NA	NA|NA|NA	0	NA	NA|NA|NA	0	NA	NA|NA|NA	0	NA	NA|NA|NA	0	NA	NA|NA|NA	0	NA	NA	NA	NA	NA	NA	NA	NA	NA	NA	NA	NA	NA	NA	NA	NA	NA	NA	NA	NA
DHDDS	dehydrodolichyl diphosphate synthase subunit	79947	ENSG00000117682	HGNC:20603	HDS|FLJ13102|DS|RP59|hCIT		01p36.11	protein-coding gene	Q86SQ9	0.40209	0.28085	0.28085	0	0	NA	NA|NA|NA	0	NA	NA|NA|NA	0	NA	NA|NA|NA	0	NA	NA|NA|NA	0	NA	NA|NA|NA	0	NA	NA	NA	NA	NA	NA	NA	NA	NA	NA	NA	NA	NA	NA	NA	NA	NA	NA	NA	NA
DIABLO	diablo IAP-binding mitochondrial protein	56616	ENSG00000184047	HGNC:21528	SMAC|DIABLO-S|FLJ25049|FLJ10537|DFNA64		12q24.31	protein-coding gene	Q9NR28	0.0078585	0.00092029	0.00092029	1	0	NA	NA|NA|NA	0	NA	NA|NA|NA	0	NA	NA|NA|NA	0	NA	NA|NA|NA	0	NA	NA|NA|NA	0	NA	NA	NA	NA	NA	NA	NA	NA	NA	NA	NA	NA	NA	NA	NA	NA	NA	NA	NA	NA
DLC1	DLC1 Rho GTPase activating protein	10395	ENSG00000164741	HGNC:2897	HP|ARHGAP7|STARD12|DLC-1|p122-RhoGAP		08p22	protein-coding gene	Q96QB1	0.49442	0.36653	0.36653	0	0	NA	NA|NA|NA	0	NA	NA|NA|NA	0	NA	NA|NA|NA	0	NA	NA|NA|NA	0	NA	NA|NA|NA	0	NA	NA	NA	NA	NA	NA	NA	NA	NA	NA	NA	NA	NA	NA	NA	NA	NA	NA	NA	NA
DNAH1	dynein axonemal heavy chain 1	25981	ENSG00000114841	HGNC:2940	XLHSRF-1|DNAHC1|HDHC7|HL-11|HL11		03p21.1	protein-coding gene	Q9P2D7	0.73385	0.60164	0.60164	0	0	NA	NA|NA|NA	0	NA	NA|NA|NA	0	NA	NA|NA|NA	0	NA	NA|NA|NA	0	NA	NA|NA|NA	0	NA	NA	0	1	NA	NA	NA	NA	NA	0	NA	1	1	NA	NA	NA	NA	NA	NA	NA
DNAH10	dynein axonemal heavy chain 10	196385	ENSG00000197653	HGNC:2941	FLJ43808		12q24.31	protein-coding gene	Q8IVF4	0.28869	0.064287	0.064287	0	0	NA	NA|NA|NA	0	NA	NA|NA|NA	0	NA	NA|NA|NA	0	NA	NA|NA|NA	0	NA	NA|NA|NA	0	NA	NA	NA	NA	NA	1	NA	NA	NA	1	1	1	1	NA	NA	NA	NA	0	1	NA
DNAH3	dynein axonemal heavy chain 3	55567	ENSG00000158486	HGNC:2949	Dnahc3b|DLP3|Hsadhc3|DKFZp434N074		16p12.3	protein-coding gene	Q8TD57	0.76944	0.82288	0.76944	0	0	NA	NA|NA|NA	0	NA	NA|NA|NA	0	NA	NA|NA|NA	0	NA	NA|NA|NA	0	NA	NA|NA|NA	0	NA	NA	NA	NA	NA	NA	NA	NA	NA	NA	NA	NA	NA	NA	NA	NA	NA	NA	NA	NA
DNAH5	dynein axonemal heavy chain 5	1767	ENSG00000039139	HGNC:2950	Dnahc5|HL1|PCD|CILD3|KTGNR		05p15.2	protein-coding gene	Q8TE73	0.09325	0.022631	0.022631	0	0	NA	NA|NA|NA	0	NA	NA|NA|NA	0	NA	NA|NA|NA	0	NA	NA|NA|NA	0	NA	NA|NA|NA	0	NA	NA	NA	NA	NA	NA	NA	NA	NA	NA	NA	NA	NA	NA	NA	NA	NA	NA	NA	NA
DNAH7	dynein axonemal heavy chain 7	56171	ENSG00000118997	HGNC:18661	KIAA0944		02q32.3	protein-coding gene	Q8WXX0	0.77486	0.6214	0.6214	0	0	NA	NA|NA|NA	0	NA	NA|NA|NA	0	NA	NA|NA|NA	0	NA	NA|NA|NA	0	NA	NA|NA|NA	0	NA	NA	NA	NA	NA	NA	NA	NA	NA	NA	NA	NA	NA	NA	NA	NA	NA	NA	NA	NA
DNAJC15	DnaJ heat shock protein family (Hsp40) member C15	29103	ENSG00000120675	HGNC:20325	MCJ	DNAJD1	13q14.11	protein-coding gene	Q9Y5T4	0.40817	0.6605	0.40817	0	0	NA	NA|NA|NA	0	NA	NA|NA|NA	0	NA	NA|NA|NA	0	NA	NA|NA|NA	0	NA	NA|NA|NA	0	NA	NA	NA	NA	NA	NA	NA	NA	NA	NA	NA	NA	NA	NA	NA	NA	NA	NA	NA	NA
DPEP2	dipeptidase 2	64174	ENSG00000167261	HGNC:23028			16q22.1	protein-coding gene	Q9H4A9	0.026736	0.034419	0.026736	0	0	NA	NA|NA|NA	0	NA	NA|NA|NA	0	NA	NA|NA|NA	0	NA	NA|NA|NA	0	NA	NA|NA|NA	0	NA	NA	NA	NA	1	NA	NA	NA	NA	1	1	1	1	NA	NA	NA	NA	NA	NA	NA
DPP4	dipeptidyl peptidase 4	1803	ENSG00000197635	HGNC:3009	DPPIV	CD26|ADCP2	02q24.2	protein-coding gene	P27487	0.78973	0.21138	0.21138	0	1	CI	0|NA|Fetal_Cortex	0	NA	NA|NA|NA	0	NA	NA|NA|NA	1	CI	0|NA|Fetal_Cortex:GM12878:IMR90:Mesenchymal_Stem_Cell:Mesendoderm:Neural_Progenitor_Cell:Trophoblast-like_Cell:hESC	0	NA	NA|NA|NA	2	1	NA	NA	NA	NA	NA	NA	NA	NA	NA	NA	NA	NA	NA	NA	NA	NA	NA	NA	NA
DRD2	dopamine receptor D2	1813	ENSG00000149295	HGNC:3023			11q23.2	protein-coding gene	P14416	0.47797	0.46464	0.46464	0	0	NA	NA|NA|NA	0	NA	NA|NA|NA	0	NA	NA|NA|NA	0	NA	NA|NA|NA	0	NA	NA|NA|NA	0	NA	NA	NA	NA	NA	NA	NA	NA	NA	NA	NA	NA	NA	NA	NA	NA	NA	0	1	NA
DUSP6	dual specificity phosphatase 6	1848	ENSG00000139318	HGNC:3072	MKP-3|PYST1		12q21.33	protein-coding gene	Q16828	0.50782	0.49853	0.49853	0	0	NA	NA|NA|NA	0	NA	NA|NA|NA	0	NA	NA|NA|NA	0	NA	NA|NA|NA	0	NA	NA|NA|NA	0	NA	NA	NA	NA	NA	NA	1	1	NA	1	1	1	1	NA	NA	NA	NA	NA	NA	NA
DYNC2H1	dynein cytoplasmic 2 heavy chain 1	79659	ENSG00000187240	HGNC:2962	hdhc11|DHC2|DHC1b|DYH1B	DNCH2	11q22.3	protein-coding gene	Q8NCM8	0.98796	0.98716	0.98716	0	0	NA	NA|NA|NA	0	NA	NA|NA|NA	0	NA	NA|NA|NA	0	NA	NA|NA|NA	0	NA	NA|NA|NA	0	NA	NA	NA	NA	NA	NA	NA	NA	NA	NA	NA	NA	NA	NA	NA	NA	NA	NA	NA	NA
DYNC2I1	dynein 2 intermediate chain 1	55112	ENSG00000126870	HGNC:21862	FLJ10300|FAP163|CFAP163|DIC6	WDR60	07q36.3	protein-coding gene	Q8WVS4	0.014089	0.0071877	0.0071877	0	0	NA	NA|NA|NA	0	NA	NA|NA|NA	0	NA	NA|NA|NA	0	NA	NA|NA|NA	0	NA	NA|NA|NA	0	NA	1	NA	NA	NA	NA	NA	NA	NA	NA	NA	NA	NA	NA	NA	NA	NA	NA	NA	NA
DYSF	dysferlin	8291	ENSG00000135636	HGNC:3097	FER1L1	LGMD2B	02p13.2	protein-coding gene	O75923	0.30226	0.49749	0.30226	0	0	NA	NA|NA|NA	0	NA	NA|NA|NA	0	NA	NA|NA|NA	0	NA	NA|NA|NA	0	NA	NA|NA|NA	0	NA	NA	NA	NA	NA	NA	NA	NA	NA	NA	NA	NA	NA	NA	NA	NA	NA	NA	NA	NA
EEF2	eukaryotic translation elongation factor 2	1938	ENSG00000167658	HGNC:3214	EEF-2	EF2	19p13.3	protein-coding gene	P13639	0.012188	0.0010404	0.0010404	0	0	NA	NA|NA|NA	0	NA	NA|NA|NA	0	NA	NA|NA|NA	0	NA	NA|NA|NA	0	NA	NA|NA|NA	0	NA	1	NA	NA	NA	NA	NA	NA	NA	NA	NA	NA	NA	NA	NA	NA	NA	NA	NA	NA
EFNA5	ephrin A5	1946	ENSG00000184349	HGNC:3225	AF1|LERK7	EPLG7	05q21.3	protein-coding gene	P52803	0.0014578	0.027905	0.0014578	0	0	NA	NA|NA|NA	0	NA	NA|NA|NA	0	NA	NA|NA|NA	0	NA	NA|NA|NA	0	NA	NA|NA|NA	0	NA	NA	NA	NA	NA	NA	NA	NA	NA	NA	NA	NA	NA	1	NA	NA	NA	NA	NA	NA
EGFR	epidermal growth factor receptor	1956	ENSG00000146648	HGNC:3236	ERBB1|ERRP	ERBB	07p11.2	protein-coding gene	P00533	0.70138	0.46818	0.46818	0	0	NA	NA|NA|NA	0	NA	NA|NA|NA	0	NA	NA|NA|NA	0	NA	NA|NA|NA	0	NA	NA|NA|NA	0	NA	NA	NA	NA	NA	NA	NA	NA	NA	NA	NA	NA	NA	NA	NA	NA	NA	NA	NA	NA
EIF2B2	eukaryotic translation initiation factor 2B subunit beta	8892	ENSG00000119718	HGNC:3258	EIF2B|EIF-2Bbeta|EIF2Bbeta		14q24.3	protein-coding gene	P49770	0.006169	0.0061724	0.006169	0	0	NA	NA|NA|NA	0	NA	NA|NA|NA	0	NA	NA|NA|NA	0	NA	NA|NA|NA	0	NA	NA|NA|NA	0	NA	1	NA	NA	NA	NA	NA	NA	NA	NA	NA	NA	NA	NA	NA	NA	NA	NA	NA	NA
EPHB2	EPH receptor B2	2048	ENSG00000133216	HGNC:3393	Hek5|Tyro5	DRT|ERK|EPHT3	01p36.12	protein-coding gene	P29323	0.85513	0.5554	0.5554	0	0	NA	NA|NA|NA	0	NA	NA|NA|NA	0	NA	NA|NA|NA	0	NA	NA|NA|NA	0	NA	NA|NA|NA	0	NA	NA	NA	NA	NA	NA	NA	NA	NA	NA	NA	NA	NA	NA	NA	NA	NA	NA	NA	NA
ERRFI1	ERBB receptor feedback inhibitor 1	54206	ENSG00000116285	HGNC:18185	MIG-6|GENE-33|RALT		01p36.23	protein-coding gene	Q9UJM3	0.59838	0.85874	0.59838	0	0	NA	NA|NA|NA	0	NA	NA|NA|NA	0	NA	NA|NA|NA	0	NA	NA|NA|NA	0	NA	NA|NA|NA	0	NA	NA	1	1	NA	NA	NA	NA	NA	1	1	1	1	NA	NA	NA	NA	NA	NA	NA
ESR1	estrogen receptor 1	2099	ENSG00000091831	HGNC:3467	NR3A1|Era|ER-alpha	ESR	06q25.1-q25.2	protein-coding gene	P03372	0.79791	0.879	0.79791	0	0	NA	NA|NA|NA	0	NA	NA|NA|NA	0	NA	NA|NA|NA	0	NA	NA|NA|NA	0	NA	NA|NA|NA	0	NA	NA	NA	NA	NA	NA	NA	NA	NA	NA	NA	NA	NA	NA	NA	NA	NA	NA	NA	NA
ETS1	ETS proto-oncogene 1, transcription factor	2113	ENSG00000134954	HGNC:3488	FLJ10768|ETS-1	EWSR2	11q24.3	protein-coding gene	P14921	0.52234	0.91988	0.52234	0	0	NA	NA|NA|NA	0	NA	NA|NA|NA	0	NA	NA|NA|NA	0	NA	NA|NA|NA	0	NA	NA|NA|NA	0	NA	NA	NA	NA	NA	NA	NA	NA	NA	NA	NA	NA	NA	NA	NA	NA	NA	NA	NA	NA
FAM98B	family with sequence similarity 98 member B	283742	ENSG00000171262	HGNC:26773	FLJ38426		15q14	protein-coding gene	Q52LJ0	0.1913	0.11877	0.11877	0	0	NA	NA|NA|NA	0	NA	NA|NA|NA	0	NA	NA|NA|NA	0	NA	NA|NA|NA	0	NA	NA|NA|NA	0	NA	NA	1	1	NA	NA	NA	NA	NA	1	1	1	1	NA	NA	NA	NA	NA	NA	NA
FARP2	FERM, ARH/RhoGEF and pleckstrin domain protein 2	9855	ENSG00000006607	HGNC:16460	KIAA0793|FIR|PLEKHC3|FRG		02q37.3	protein-coding gene	O94887	0.0038282	0.0073049	0.0038282	0	0	NA	NA|NA|NA	0	NA	NA|NA|NA	0	NA	NA|NA|NA	0	NA	NA|NA|NA	0	NA	NA|NA|NA	0	NA	1	NA	NA	NA	NA	NA	NA	NA	NA	NA	NA	NA	NA	NA	NA	NA	NA	NA	NA
FBN2	fibrillin 2	2201	ENSG00000138829	HGNC:3604	DA9	CCA	05q23.3	protein-coding gene	P35556	0.1849	0.051038	0.051038	0	0	NA	NA|NA|NA	0	NA	NA|NA|NA	0	NA	NA|NA|NA	0	NA	NA|NA|NA	0	NA	NA|NA|NA	0	NA	NA	NA	NA	NA	NA	NA	NA	NA	NA	NA	NA	NA	NA	NA	NA	NA	NA	NA	NA
FBN3	fibrillin 3	84467	ENSG00000142449	HGNC:18794	KIAA1776		19p13.2	protein-coding gene	Q75N90	0.86012	0.4141	0.4141	0	0	NA	NA|NA|NA	0	NA	NA|NA|NA	0	NA	NA|NA|NA	0	NA	NA|NA|NA	0	NA	NA|NA|NA	0	NA	NA	NA	NA	NA	NA	NA	NA	NA	NA	NA	NA	NA	NA	NA	NA	NA	NA	NA	NA
FBXL17	F-box and leucine rich repeat protein 17	64839	ENSG00000145743	HGNC:13615	DKFZP434C1715|Fbx13|Fbl17	FBXO13	05q21.3	protein-coding gene	Q9UF56	0.01612	0.016222	0.01612	0	0	NA	NA|NA|NA	0	NA	NA|NA|NA	0	NA	NA|NA|NA	0	NA	NA|NA|NA	0	NA	NA|NA|NA	0	NA	NA	NA	NA	NA	NA	NA	NA	NA	NA	NA	NA	NA	1	NA	NA	NA	NA	NA	NA
FFAR3	free fatty acid receptor 3	2865	ENSG00000185897	HGNC:4499	FFA3R	GPR41	19q13.12	protein-coding gene	O14843	NA	0.011246	0.011246	0	0	NA	NA|NA|NA	0	NA	NA|NA|NA	0	NA	NA|NA|NA	0	NA	NA|NA|NA	0	NA	NA|NA|NA	0	NA	1	NA	NA	NA	NA	NA	NA	NA	NA	NA	NA	NA	NA	NA	NA	NA	NA	NA	NA
FHIT	fragile histidine triad diadenosine triphosphatase	2272	ENSG00000189283	HGNC:3701	FRA3B|AP3Aase		03p14.2	protein-coding gene	P49789	0.26232	0.25291	0.25291	0	0	NA	NA|NA|NA	0	NA	NA|NA|NA	0	NA	NA|NA|NA	0	NA	NA|NA|NA	0	NA	NA|NA|NA	0	NA	NA	NA	NA	NA	NA	NA	NA	NA	NA	NA	NA	NA	NA	NA	NA	NA	NA	NA	NA
FHL2	four and a half LIM domains 2	2274	ENSG00000115641	HGNC:3703	SLIM3|DRAL		02q12.2	protein-coding gene	Q14192	0.019014	0.00095507	0.00095507	1	0	NA	NA|NA|NA	0	NA	NA|NA|NA	0	NA	NA|NA|NA	0	NA	NA|NA|NA	0	NA	NA|NA|NA	0	NA	NA	NA	NA	NA	NA	NA	NA	NA	NA	NA	NA	NA	NA	NA	NA	NA	NA	NA	NA
FKBP6	FKBP prolyl isomerase family member 6 (inactive)	8468	ENSG00000077800	HGNC:3722	PPIase|FKBP36		07q11.23	protein-coding gene	O75344	0.13314	0.076407	0.076407	0	0	NA	NA|NA|NA	0	NA	NA|NA|NA	0	NA	NA|NA|NA	0	NA	NA|NA|NA	0	NA	NA|NA|NA	0	NA	NA	NA	NA	NA	NA	NA	NA	NA	NA	NA	NA	NA	NA	NA	NA	NA	NA	NA	NA
FOXP1	forkhead box P1	27086	ENSG00000114861	HGNC:3823	QRF1|12CC4|HSPC215|hFKH1B		03p13	protein-coding gene	Q9H334	0.19257	0.11873	0.11873	0	0	NA	NA|NA|NA	0	NA	NA|NA|NA	0	NA	NA|NA|NA	0	NA	NA|NA|NA	0	NA	NA|NA|NA	0	NA	NA	NA	NA	NA	1	NA	NA	NA	1	1	1	1	NA	NA	NA	NA	NA	NA	NA
GABARAPL2	GABA type A receptor associated protein like 2	11345	ENSG00000034713	HGNC:13291	GEF2|ATG8|GATE16|GATE-16|ATG8C		16q23.1	protein-coding gene	P60520	0.22215	0.31717	0.22215	0	0	NA	NA|NA|NA	0	NA	NA|NA|NA	0	NA	NA|NA|NA	1	CI	0|NA|Liver:IMR90:Mesenchymal_Stem_Cell:Mesendoderm:Trophoblast-like_Cell:hESC	0	NA	NA|NA|NA	1	1	NA	NA	NA	NA	NA	NA	NA	NA	NA	NA	NA	NA	NA	NA	NA	NA	NA	NA	NA
GABPB1	GA binding protein transcription factor subunit beta 1	2553	ENSG00000104064	HGNC:4074	E4TF1-47|GABPB	GABPB2	15q21.2	protein-coding gene	Q06547	0.0023427	0.00025833	0.00025833	1	0	NA	NA|NA|NA	0	NA	NA|NA|NA	0	NA	NA|NA|NA	0	NA	NA|NA|NA	0	NA	NA|NA|NA	0	NA	NA	NA	NA	NA	NA	NA	NA	NA	NA	NA	NA	NA	NA	NA	NA	NA	NA	NA	NA
GABRB3	gamma-aminobutyric acid type A receptor subunit beta3	2562	ENSG00000166206	HGNC:4083			15q12	protein-coding gene	P28472	0.83694	0.65436	0.65436	0	0	NA	NA|NA|NA	0	NA	NA|NA|NA	0	NA	NA|NA|NA	0	NA	NA|NA|NA	0	NA	NA|NA|NA	0	NA	NA	NA	NA	NA	NA	NA	NA	NA	NA	NA	NA	NA	NA	NA	NA	NA	NA	NA	NA
GCA	grancalcin	25801	ENSG00000115271	HGNC:15990	GCL		02q24.2	protein-coding gene	P28676	0.016095	0.020674	0.016095	0	0	NA	NA|NA|NA	0	NA	NA|NA|NA	0	NA	NA|NA|NA	1	CI	0|NA|GM12878:IMR90:Mesenchymal_Stem_Cell:hESC	0	NA	NA|NA|NA	1	1	NA	NA	NA	NA	NA	NA	NA	NA	NA	NA	NA	NA	NA	NA	NA	NA	NA	NA	NA
GCG	glucagon	2641	ENSG00000115263	HGNC:4191	GLP1|GLP2|GRPP|GLP-1		02q24.2	protein-coding gene	P01275	0.015802	0.022435	0.015802	0	0	NA	NA|NA|NA	0	NA	NA|NA|NA	0	NA	NA|NA|NA	1	CI	0|NA|IMR90:Mesenchymal_Stem_Cell:Mesendoderm:hESC	0	NA	NA|NA|NA	1	1	NA	NA	NA	NA	NA	NA	NA	NA	NA	NA	NA	NA	NA	NA	NA	NA	NA	NA	NA
GEM	GTP binding protein overexpressed in skeletal muscle	2669	ENSG00000164949	HGNC:4234	KIR		08q22.1	protein-coding gene	P55040	0.66315	0.5663	0.5663	0	0	NA	NA|NA|NA	0	NA	NA|NA|NA	0	NA	NA|NA|NA	1	CI	0|NA|Mesenchymal_Stem_Cell	0	NA	NA|NA|NA	1	1	NA	NA	NA	NA	NA	NA	NA	NA	NA	NA	NA	NA	NA	NA	NA	NA	NA	NA	NA
GEMIN6	gem nuclear organelle associated protein 6	79833	ENSG00000152147	HGNC:20044	FLJ23459		02p22.1	protein-coding gene	Q8WXD5	8.4939e-05	0.0005106	8.4939e-05	1	0	NA	NA|NA|NA	0	NA	NA|NA|NA	0	NA	NA|NA|NA	0	NA	NA|NA|NA	0	NA	NA|NA|NA	0	NA	NA	NA	NA	NA	NA	NA	NA	NA	NA	NA	NA	NA	NA	NA	NA	NA	NA	NA	NA
GFM2	GTP dependent ribosome recycling factor mitochondrial 2	84340	ENSG00000164347	HGNC:29682	EFG2|FLJ21661|EF-G2mt		05q13.3	protein-coding gene	Q969S9	0.21304	0.21244	0.21244	0	0	NA	NA|NA|NA	0	NA	NA|NA|NA	0	NA	NA|NA|NA	0	NA	NA|NA|NA	0	NA	NA|NA|NA	0	NA	NA	NA	NA	NA	NA	NA	NA	NA	NA	NA	NA	NA	NA	NA	NA	NA	NA	NA	NA
GLE1	GLE1 RNA export mediator	2733	ENSG00000119392	HGNC:4315	hGLE1	GLE1L|LCCS1	09q34.11	protein-coding gene	Q53GS7	0.61625	0.86929	0.61625	0	0	NA	NA|NA|NA	0	NA	NA|NA|NA	0	NA	NA|NA|NA	0	NA	NA|NA|NA	0	NA	NA|NA|NA	0	NA	1	NA	NA	NA	NA	NA	NA	NA	NA	NA	NA	NA	NA	NA	NA	NA	NA	NA	NA
GPLD1	glycosylphosphatidylinositol specific phospholipase D1	2822	ENSG00000112293	HGNC:4459			06p22.3	protein-coding gene	P80108	0.63908	0.49844	0.49844	0	0	NA	NA|NA|NA	0	NA	NA|NA|NA	0	NA	NA|NA|NA	0	NA	NA|NA|NA	0	NA	NA|NA|NA	0	NA	NA	NA	NA	NA	NA	NA	NA	NA	NA	NA	NA	NA	NA	NA	NA	NA	NA	NA	NA
GPR37	G protein-coupled receptor 37	2861	ENSG00000170775	HGNC:4494	EDNRBL|hET(B)R-LP|PAELR		07q31.33	protein-coding gene	O15354	0.056593	0.061441	0.056593	0	0	NA	NA|NA|NA	0	NA	NA|NA|NA	0	NA	NA|NA|NA	0	NA	NA|NA|NA	0	NA	NA|NA|NA	0	NA	NA	NA	NA	NA	NA	NA	NA	NA	NA	NA	NA	NA	NA	NA	NA	NA	NA	NA	NA
GRIN2A	glutamate ionotropic receptor NMDA type subunit 2A	2903	ENSG00000183454	HGNC:4585	GluN2A	NMDAR2A	16p13.2	protein-coding gene	Q12879	0.97422	0.98737	0.97422	0	0	NA	NA|NA|NA	0	NA	NA|NA|NA	0	NA	NA|NA|NA	0	NA	NA|NA|NA	0	NA	NA|NA|NA	0	NA	NA	NA	NA	NA	NA	NA	NA	NA	NA	NA	NA	NA	NA	NA	NA	NA	NA	NA	NA
GRK4	G protein-coupled receptor kinase 4	2868	ENSG00000125388	HGNC:4543	GPRK4	GPRK2L	04p16.3	protein-coding gene	P32298	0.48889	0.32617	0.32617	0	1	CI	0|NA|Promoter_anchored_loops	0	NA	NA|NA|NA	0	NA	NA|NA|NA	1	CI	0|NA|Promoter_anchored_loops	0	NA	NA|NA|NA	2	1	NA	NA	NA	NA	NA	NA	NA	NA	NA	NA	NA	NA	NA	NA	NA	NA	NA	NA	NA
GTF2A1	general transcription factor IIA subunit 1	2957	ENSG00000165417	HGNC:4646	TFIIA		14q31.1	protein-coding gene	P52655	0.60097	0.0068604	0.0068604	0	0	NA	NA|NA|NA	0	NA	NA|NA|NA	0	NA	NA|NA|NA	0	NA	NA|NA|NA	0	NA	NA|NA|NA	0	NA	NA	NA	NA	NA	NA	NA	NA	NA	NA	NA	NA	NA	NA	NA	NA	NA	NA	NA	NA
GTF2IRD1	GTF2I repeat domain containing 1	9569	ENSG00000006704	HGNC:4661	MusTRD1|RBAP2|GTF3|WBSCR12|BEN|Cream1	WBSCR11	07q11.23	protein-coding gene	Q9UHL9	0.61484	0.87031	0.61484	0	0	NA	NA|NA|NA	0	NA	NA|NA|NA	0	NA	NA|NA|NA	0	NA	NA|NA|NA	0	NA	NA|NA|NA	0	NA	NA	NA	NA	NA	NA	NA	NA	NA	NA	NA	NA	NA	NA	NA	NA	NA	NA	NA	NA
GUF1	GTP binding elongation factor GUF1	60558	ENSG00000151806	HGNC:25799	FLJ13220		04p12	protein-coding gene	Q8N442	0.46926	0.71449	0.46926	0	0	NA	NA|NA|NA	0	NA	NA|NA|NA	0	NA	NA|NA|NA	1	CI	0|NA|Mesendoderm:hESC	0	NA	NA|NA|NA	1	1	NA	NA	NA	NA	NA	NA	NA	NA	NA	NA	NA	NA	NA	NA	NA	NA	NA	NA	NA
HAUS3	HAUS augmin like complex subunit 3	79441	ENSG00000214367	HGNC:28719	MGC4701|IT1|dgt3	C4orf15	04p16.3	protein-coding gene	Q68CZ6	0.86435	0.6279	0.6279	0	1	CI	0|NA|Promoter_anchored_loops:EP_correlation_cell_type_oneway	0	NA	NA|NA|NA	0	NA	NA|NA|NA	1	CI	0|NA|Promoter_anchored_loops:EP_correlation_cell_type_oneway:Adult_Cortex	0	NA	NA|NA|NA	2	1	NA	NA	NA	NA	NA	NA	NA	NA	NA	NA	NA	NA	NA	NA	NA	NA	NA	NA	NA
HOMER2	homer scaffold protein 2	9455	ENSG00000103942	HGNC:17513	CPD|Cupidin|Vesl-2|HOMER-2B|HOMER-2|HOMER-2A|DFNA68		15q25.2	protein-coding gene	Q9NSB8	0.46494	0.25267	0.25267	0	0	NA	NA|NA|NA	0	NA	NA|NA|NA	0	NA	NA|NA|NA	1	CI	0|NA|Fetal_Cortex	0	NA	NA|NA|NA	1	1	NA	NA	NA	NA	NA	NA	NA	NA	NA	NA	NA	NA	NA	NA	NA	NA	NA	NA	NA
HOXB4	homeobox B4	3214	ENSG00000182742	HGNC:5115		HOX2|HOX2F	17q21.32	protein-coding gene	P17483	0.063782	0.093376	0.063782	0	0	NA	NA|NA|NA	0	NA	NA|NA|NA	0	NA	NA|NA|NA	0	NA	NA|NA|NA	0	NA	NA|NA|NA	0	NA	NA	NA	NA	NA	NA	NA	NA	NA	NA	NA	NA	NA	1	NA	NA	NA	NA	NA	NA
HTRA3	HtrA serine peptidase 3	94031	ENSG00000170801	HGNC:30406	Tasp|Prsp		04p16.1	protein-coding gene	P83110	0.6101	0.27006	0.27006	0	0	NA	NA|NA|NA	0	NA	NA|NA|NA	0	NA	NA|NA|NA	0	NA	NA|NA|NA	0	NA	NA|NA|NA	0	NA	NA	NA	NA	NA	NA	NA	NA	NA	NA	NA	NA	NA	NA	NA	NA	NA	NA	NA	NA
IFIH1	interferon induced with helicase C domain 1	64135	ENSG00000115267	HGNC:18873	MDA-5|Hlcd|MDA5|IDDM19		02q24.2	protein-coding gene	Q9BYX4	0.025405	0.020364	0.020364	0	0	NA	NA|NA|NA	0	NA	NA|NA|NA	0	NA	NA|NA|NA	1	CI	0|NA|GM12878:IMR90:Mesenchymal_Stem_Cell:hESC	0	NA	NA|NA|NA	1	1	NA	NA	NA	NA	NA	NA	NA	NA	NA	NA	NA	NA	NA	NA	NA	NA	NA	NA	NA
IGF2BP1	insulin like growth factor 2 mRNA binding protein 1	10642	ENSG00000159217	HGNC:28866	IMP-1		17q21.32	protein-coding gene	Q9NZI8	0.10816	0.18981	0.10816	0	0	NA	NA|NA|NA	0	NA	NA|NA|NA	0	NA	NA|NA|NA	0	NA	NA|NA|NA	0	NA	NA|NA|NA	0	NA	NA	NA	NA	NA	NA	NA	NA	NA	NA	NA	NA	NA	NA	NA	NA	NA	NA	NA	NA
IL31	interleukin 31	386653	ENSG00000204671	HGNC:19372	IL-31		12q24.31	protein-coding gene	Q6EBC2	0.58449	0.00067063	0.00067063	1	0	NA	NA|NA|NA	0	NA	NA|NA|NA	0	NA	NA|NA|NA	0	NA	NA|NA|NA	0	NA	NA|NA|NA	0	NA	NA	NA	NA	NA	NA	NA	NA	NA	NA	NA	NA	NA	NA	NA	NA	NA	NA	NA	NA
IMMP2L	inner mitochondrial membrane peptidase subunit 2	83943	ENSG00000184903	HGNC:14598	IMP2	IMMP2L-IT1	07q31.1	protein-coding gene	Q96T52	0.26831	0.29753	0.26831	0	0	NA	NA|NA|NA	0	NA	NA|NA|NA	0	NA	NA|NA|NA	0	NA	NA|NA|NA	0	NA	NA|NA|NA	0	NA	NA	NA	NA	NA	NA	NA	NA	NA	NA	NA	NA	NA	NA	NA	NA	NA	NA	NA	NA
IMPA1	inositol monophosphatase 1	3612	ENSG00000133731	HGNC:6050		IMPA	08q21.13	protein-coding gene	P29218	0.0067007	0.011105	0.0067007	0	0	NA	NA|NA|NA	0	NA	NA|NA|NA	0	NA	NA|NA|NA	0	NA	NA|NA|NA	0	NA	NA|NA|NA	0	NA	1	NA	NA	NA	NA	NA	NA	NA	NA	NA	NA	NA	NA	NA	NA	NA	NA	NA	NA
INO80D	INO80 complex subunit D	54891	ENSG00000114933	HGNC:25997	FLJ20309		02q33.3	protein-coding gene	Q53TQ3	0.041058	0.052467	0.041058	0	0	NA	NA|NA|NA	0	NA	NA|NA|NA	0	NA	NA|NA|NA	0	NA	NA|NA|NA	0	NA	NA|NA|NA	0	NA	1	NA	NA	NA	NA	NA	NA	NA	NA	NA	NA	NA	NA	NA	NA	NA	NA	NA	NA
JUND	JunD proto-oncogene, AP-1 transcription factor subunit	3727	ENSG00000130522	HGNC:6206	AP-1		19p13.11	protein-coding gene	P17535	0.11942	0.34055	0.11942	0	0	NA	NA|NA|NA	0	NA	NA|NA|NA	0	NA	NA|NA|NA	0	NA	NA|NA|NA	0	NA	NA|NA|NA	0	NA	NA	NA	NA	NA	NA	NA	NA	NA	NA	NA	NA	NA	NA	NA	NA	NA	NA	NA	NA
KALRN	kalirin RhoGEF kinase	8997	ENSG00000160145	HGNC:4814	duo|Hs.8004|TRAD|DUET|Kalirin|ARHGEF24	HAPIP	03q21.1-q21.2	protein-coding gene	O60229	0.037847	0.020315	0.020315	0	0	NA	NA|NA|NA	0	NA	NA|NA|NA	0	NA	NA|NA|NA	0	NA	NA|NA|NA	0	NA	NA|NA|NA	0	NA	NA	NA	NA	1	NA	NA	NA	NA	1	1	1	1	NA	NA	NA	NA	NA	NA	NA
KANSL1	KAT8 regulatory NSL complex subunit 1	284058	ENSG00000120071	HGNC:24565	DKFZP727C091|MSL1v1|CENP-36|NSL1	KIAA1267	17q21.31	protein-coding gene	Q7Z3B3	0.0098764	0.011316	0.0098764	0	0	NA	NA|NA|NA	0	NA	NA|NA|NA	0	NA	NA|NA|NA	0	NA	NA|NA|NA	0	NA	NA|NA|NA	0	NA	NA	NA	NA	NA	NA	1	1	NA	1	1	1	1	NA	NA	NA	NA	NA	NA	NA
KAT14	lysine acetyltransferase 14	57325	ENSG00000149474	HGNC:15904	CRP2BP|dJ717M23.1|PRO1194|ATAC2	CSRP2BP	20p11.23	protein-coding gene	Q9H8E8	0.30457	0.47202	0.30457	0	0	NA	NA|NA|NA	0	NA	NA|NA|NA	0	NA	NA|NA|NA	0	NA	NA|NA|NA	0	NA	NA|NA|NA	0	NA	NA	NA	NA	NA	NA	NA	NA	NA	NA	NA	NA	NA	NA	NA	NA	NA	NA	NA	NA
KCNJ11	potassium inwardly rectifying channel subfamily J member 11	3767	ENSG00000187486	HGNC:6257	Kir6.2|BIR		11p15.1	protein-coding gene	Q14654	0.058342	0.17694	0.058342	0	0	NA	NA|NA|NA	0	NA	NA|NA|NA	0	NA	NA|NA|NA	0	NA	NA|NA|NA	0	NA	NA|NA|NA	0	NA	NA	NA	NA	1	NA	NA	NA	NA	1	1	1	1	NA	NA	NA	NA	NA	NA	NA
KCNK1	potassium two pore domain channel subfamily K member 1	3775	ENSG00000135750	HGNC:6272	K2p1.1|DPK|TWIK-1		01q42.2	protein-coding gene	O00180	0.025712	0.066232	0.025712	0	0	NA	NA|NA|NA	0	NA	NA|NA|NA	0	NA	NA|NA|NA	0	NA	NA|NA|NA	0	NA	NA|NA|NA	0	NA	NA	NA	NA	NA	NA	NA	NA	NA	NA	NA	NA	NA	NA	NA	NA	NA	NA	NA	NA
KIDINS220	kinase D interacting substrate 220	57498	ENSG00000134313	HGNC:29508	ARMS		02p25.1	protein-coding gene	Q9ULH0	0.39847	0.54736	0.39847	0	0	NA	NA|NA|NA	0	NA	NA|NA|NA	0	NA	NA|NA|NA	0	NA	NA|NA|NA	0	NA	NA|NA|NA	0	NA	NA	NA	NA	NA	NA	NA	NA	NA	NA	NA	NA	NA	NA	NA	NA	NA	NA	NA	NA
KIF26B	kinesin family member 26B	55083	ENSG00000162849	HGNC:25484	FLJ10157		01q44	protein-coding gene	Q2KJY2	0.52389	0.59446	0.52389	0	0	NA	NA|NA|NA	0	NA	NA|NA|NA	0	NA	NA|NA|NA	0	NA	NA|NA|NA	0	NA	NA|NA|NA	0	NA	NA	NA	NA	NA	NA	NA	NA	NA	NA	NA	NA	NA	NA	NA	NA	NA	NA	NA	NA
KLC1	kinesin light chain 1	3831	ENSG00000126214	HGNC:6387	KNS2A|KLC|hKLC1S|hKLC1N|hKLC1P|hKLC1G|hKLC1R|hKLC1J|hKLC1B	KNS2	14q32.33	protein-coding gene	Q07866	0.10013	0.077597	0.077597	0	0	NA	NA|NA|NA	0	NA	NA|NA|NA	0	NA	NA|NA|NA	0	NA	NA|NA|NA	0	NA	NA|NA|NA	0	NA	NA	1	1	NA	NA	NA	NA	NA	1	1	1	1	NA	NA	NA	NA	NA	NA	NA
KLHL22	kelch like family member 22	84861	ENSG00000099910	HGNC:25888	FLJ14360|KELCHL		22q11.21	protein-coding gene	Q53GT1	0.62358	0.20092	0.20092	0	0	NA	NA|NA|NA	0	NA	NA|NA|NA	0	NA	NA|NA|NA	0	NA	NA|NA|NA	0	NA	NA|NA|NA	0	NA	NA	NA	NA	NA	NA	NA	NA	NA	NA	NA	NA	NA	NA	NA	NA	NA	NA	NA	NA
KMT2D	lysine methyltransferase 2D	8085	ENSG00000167548	HGNC:7133	ALR|MLL4|CAGL114	TNRC21|MLL2	12q13.12	protein-coding gene	O14686	0.28332	0.10441	0.10441	0	1	CI	0|NA|Fetal_Cortex	0	NA	NA|NA|NA	0	NA	NA|NA|NA	1	CI	0|NA|Fetal_Cortex	0	NA	NA|NA|NA	2	1	NA	NA	NA	NA	NA	NA	NA	NA	NA	NA	NA	NA	NA	NA	NA	NA	NA	NA	NA
KMT5A	lysine methyltransferase 5A	387893	ENSG00000183955	HGNC:29489	SET8|SET07|PR-Set7	SETD8	12q24.31	protein-coding gene	Q9NQR1	0.0069512	0.031403	0.0069512	0	0	NA	NA|NA|NA	0	NA	NA|NA|NA	0	NA	NA|NA|NA	0	NA	NA|NA|NA	0	NA	NA|NA|NA	0	NA	1	NA	NA	NA	NA	NA	NA	NA	NA	NA	NA	NA	NA	NA	NA	NA	NA	NA	NA
LIMCH1	LIM and calponin homology domains 1	22998	ENSG00000064042	HGNC:29191	DKFZP686A01247|LIMCH1A|LMO7B		04p13	protein-coding gene	Q9UPQ0	0.28891	0.38698	0.28891	0	0	NA	NA|NA|NA	0	NA	NA|NA|NA	0	NA	NA|NA|NA	0	NA	NA|NA|NA	0	NA	NA|NA|NA	0	NA	NA	1	1	NA	NA	NA	NA	NA	1	1	1	1	NA	NA	NA	NA	NA	NA	NA
LINGO1	leucine rich repeat and Ig domain containing 1	84894	ENSG00000169783	HGNC:21205	FLJ14594|LERN1	LRRN6A	15q24.3	protein-coding gene	Q96FE5	0.18114	0.02882	0.02882	0	0	NA	NA|NA|NA	0	NA	NA|NA|NA	0	NA	NA|NA|NA	0	NA	NA|NA|NA	0	NA	NA|NA|NA	0	NA	1	NA	NA	NA	NA	NA	NA	NA	NA	NA	NA	NA	NA	NA	NA	NA	NA	NA	NA
LMAN2	lectin, mannose binding 2	10960	ENSG00000169223	HGNC:16986	GP36B|VIP36	C5orf8	05q35.3	protein-coding gene	Q12907	0.041056	0.019345	0.019345	0	0	NA	NA|NA|NA	0	NA	NA|NA|NA	0	NA	NA|NA|NA	0	NA	NA|NA|NA	0	NA	NA|NA|NA	0	NA	1	NA	NA	NA	NA	NA	NA	NA	NA	NA	NA	NA	NA	NA	NA	NA	NA	NA	NA
LOXL1	lysyl oxidase like 1	4016	ENSG00000129038	HGNC:6665	LOXL|LOL		15q24.1	protein-coding gene	Q08397	0.51373	0.45828	0.45828	0	1	CI	0|NA|Adult_Cortex	0	NA	NA|NA|NA	0	NA	NA|NA|NA	1	CI	0|NA|Adult_Cortex:Left_Ventricle:IMR90:Mesenchymal_Stem_Cell:Mesendoderm:hESC	1	CI	0|NA|IMR90:Mesenchymal_Stem_Cell:Mesendoderm:hESC	3	1	NA	NA	NA	NA	NA	NA	NA	NA	NA	NA	NA	NA	NA	NA	NA	NA	NA	NA	NA
LRPPRC	leucine rich pentatricopeptide repeat containing	10128	ENSG00000138095	HGNC:15714	GP130|LRP130	LSFC	02p21	protein-coding gene	P42704	0.011975	0.0028229	0.0028229	0	1	Positional,eQTL	7|PsychENCODE_eQTLs:CMC_SVA_cis|NA	1	Positional	1|NA|NA	1	Positional	1|NA|NA	1	Positional,eQTL	7|eQTLcatalogue/Fairfax_2014_IFN24:PsychENCODE_eQTLs:eQTLGen_cis_eQTLs:BIOSQTL/BIOS_eQTL_geneLevel:CMC_SVA_cis:GTEx/v8/Whole_Blood:GTEx/v8/Testis:GTEx/v8/Thyroid|hESC	1	Positional,eQTL	1|eQTLcatalogue/Fairfax_2014_IFN24:eQTLGen_cis_eQTLs:CMC_SVA_cis|NA	4	1	NA	NA	NA	NA	NA	NA	NA	NA	NA	NA	NA	NA	NA	NA	NA	NA	NA	NA	NA
LRRC14	leucine rich repeat containing 14	9684	ENSG00000160959	HGNC:20419	KIAA0014|LRRC14A		08q24.3	protein-coding gene	Q15048	0.32813	0.29298	0.29298	0	0	NA	NA|NA|NA	0	NA	NA|NA|NA	0	NA	NA|NA|NA	0	NA	NA|NA|NA	0	NA	NA|NA|NA	0	NA	NA	NA	NA	NA	NA	NA	NA	NA	NA	NA	NA	NA	NA	NA	NA	NA	NA	NA	NA
LTBP1	latent transforming growth factor beta binding protein 1	4052	ENSG00000049323	HGNC:6714			02p22.3	protein-coding gene	Q14766	0.13577	0.10622	0.10622	0	0	NA	NA|NA|NA	0	NA	NA|NA|NA	0	NA	NA|NA|NA	0	NA	NA|NA|NA	0	NA	NA|NA|NA	0	NA	NA	NA	NA	NA	NA	NA	NA	NA	NA	NA	NA	NA	NA	NA	NA	NA	NA	NA	NA
LY75	lymphocyte antigen 75	4065	ENSG00000054219	HGNC:6729	DEC-205|CLEC13B|CD205		02q24.2	protein-coding gene	O60449	0.08224	0.031813	0.031813	0	1	Positional	93|NA|NA	1	Positional	3|NA|NA	1	Positional	2|NA|NA	1	Positional,eQTL	93|eQTLcatalogue/BLUEPRINT_ge_neutrophil:eQTLcatalogue/Lepik_2017_ge_blood:eQTLGen_cis_eQTLs:GTEx/v8/Whole_Blood:GTEx/v8/Testis|Aorta:Left_Ventricle:Liver:Pancreas:GM12878:IMR90:Mesenchymal_Stem_Cell:Mesendoderm:Trophoblast-like_Cell:hESC	1	Positional,CI	3|NA|IMR90:Mesenchymal_Stem_Cell:Mesendoderm:Trophoblast-like_Cell	4	1	NA	NA	NA	NA	NA	NA	NA	NA	NA	NA	NA	NA	NA	NA	NA	NA	NA	NA	NA
MACROD1	mono-ADP ribosylhydrolase 1	28992	ENSG00000133315	HGNC:29598	LRP16		11q13.1	protein-coding gene	Q9BQ69	0.0005357	0.0011406	0.0005357	1	0	NA	NA|NA|NA	0	NA	NA|NA|NA	0	NA	NA|NA|NA	0	NA	NA|NA|NA	0	NA	NA|NA|NA	0	NA	NA	NA	NA	NA	NA	NA	NA	NA	NA	NA	NA	NA	NA	NA	NA	NA	NA	NA	NA
MAP1LC3B	microtubule associated protein 1 light chain 3 beta	81631	ENSG00000140941	HGNC:13352	ATG8F		16q24.2	protein-coding gene	Q9GZQ8	0.71536	0.40019	0.40019	0	0	NA	NA|NA|NA	0	NA	NA|NA|NA	0	NA	NA|NA|NA	0	NA	NA|NA|NA	0	NA	NA|NA|NA	0	NA	NA	NA	NA	NA	NA	NA	NA	NA	NA	NA	NA	NA	NA	NA	NA	NA	NA	NA	NA
MAP3K4	mitogen-activated protein kinase kinase kinase 4	4216	ENSG00000085511	HGNC:6856	MTK1|MAPKKK4|KIAA0213	MEKK4	06q26	protein-coding gene	Q9Y6R4	0.44114	0.37813	0.37813	0	0	NA	NA|NA|NA	0	NA	NA|NA|NA	0	NA	NA|NA|NA	0	NA	NA|NA|NA	0	NA	NA|NA|NA	0	NA	NA	NA	NA	NA	NA	NA	NA	NA	NA	NA	NA	NA	NA	NA	NA	NA	NA	NA	NA
MAPK3	mitogen-activated protein kinase 3	5595	ENSG00000102882	HGNC:6877	ERK1|p44mapk|p44erk1	PRKM3	16p11.2	protein-coding gene	P27361	0.35153	0.55631	0.35153	0	0	NA	NA|NA|NA	0	NA	NA|NA|NA	0	NA	NA|NA|NA	0	NA	NA|NA|NA	0	NA	NA|NA|NA	0	NA	NA	NA	NA	NA	NA	NA	NA	NA	NA	NA	NA	NA	NA	NA	NA	NA	NA	NA	NA
MAPT	microtubule associated protein tau	4137	ENSG00000186868	HGNC:6893	MTBT1|tau|PPND|FTDP-17|TAU|MSTD|MTBT2|FLJ31424|MGC138549|PPP1R103|tau-40	DDPAC|MAPTL	17q21.31	protein-coding gene	P10636	0.0091559	0.0092918	0.0091559	0	0	NA	NA|NA|NA	0	NA	NA|NA|NA	0	NA	NA|NA|NA	0	NA	NA|NA|NA	0	NA	NA|NA|NA	0	NA	NA	NA	NA	NA	NA	1	1	NA	1	1	1	1	NA	NA	NA	NA	NA	NA	NA
MARF1	meiosis regulator and mRNA stability factor 1	9665	ENSG00000166783	HGNC:29562	LKAP|PPP1R34|LMKB	KIAA0430	16p13.11	protein-coding gene	Q9Y4F3	0.065467	0.15214	0.065467	0	0	NA	NA|NA|NA	0	NA	NA|NA|NA	0	NA	NA|NA|NA	0	NA	NA|NA|NA	0	NA	NA|NA|NA	0	NA	NA	NA	NA	NA	NA	NA	NA	NA	NA	NA	NA	NA	NA	NA	NA	NA	NA	NA	NA
MARK3	microtubule affinity regulating kinase 3	4140	ENSG00000075413	HGNC:6897	CTAK1|KP78|PAR-1A		14q32.32-q32.33	protein-coding gene	P27448	0.064802	0.10231	0.064802	0	0	NA	NA|NA|NA	0	NA	NA|NA|NA	0	NA	NA|NA|NA	0	NA	NA|NA|NA	0	NA	NA|NA|NA	0	NA	NA	1	1	NA	NA	NA	NA	NA	1	1	1	1	NA	NA	NA	NA	NA	NA	NA
MAU2	MAU2 sister chromatid cohesion factor	23383	ENSG00000129933	HGNC:29140	MGC75361|mau-2|MAU2L|SCC4	KIAA0892	19p13.11	protein-coding gene	Q9Y6X3	0.10245	0.08067	0.08067	0	0	NA	NA|NA|NA	0	NA	NA|NA|NA	0	NA	NA|NA|NA	0	NA	NA|NA|NA	0	NA	NA|NA|NA	0	NA	NA	NA	NA	NA	1	NA	NA	NA	1	1	1	1	NA	NA	NA	NA	NA	NA	NA
MCRS1	microspherule protein 1	10445	ENSG00000187778	HGNC:6960	ICP22BP|MSP58|P78|MCRS2|INO80Q		12q13.12	protein-coding gene	Q96EZ8	0.015853	0.0011411	0.0011411	0	1	CI	0|NA|Promoter_anchored_loops	0	NA	NA|NA|NA	0	NA	NA|NA|NA	1	CI	0|NA|Promoter_anchored_loops:IMR90:Mesenchymal_Stem_Cell:Mesendoderm:Trophoblast-like_Cell	1	CI	0|NA|IMR90:Mesenchymal_Stem_Cell:Mesendoderm:Trophoblast-like_Cell	3	1	NA	NA	NA	NA	NA	NA	NA	NA	NA	NA	NA	NA	NA	NA	NA	NA	NA	NA	NA
ME2	malic enzyme 2	4200	ENSG00000082212	HGNC:6984			18q21.2	protein-coding gene	P23368	0.34649	0.33293	0.33293	0	0	NA	NA|NA|NA	0	NA	NA|NA|NA	0	NA	NA|NA|NA	0	NA	NA|NA|NA	0	NA	NA|NA|NA	0	NA	NA	NA	NA	NA	NA	NA	NA	NA	NA	NA	NA	NA	NA	NA	NA	NA	0	1	NA
METTL24	methyltransferase like 24	728464	ENSG00000053328	HGNC:21566	dJ71D21.2	C6orf186	06q21	protein-coding gene	Q5JXM2	0.17222	0.15868	0.15868	0	0	NA	NA|NA|NA	0	NA	NA|NA|NA	0	NA	NA|NA|NA	0	NA	NA|NA|NA	0	NA	NA|NA|NA	0	NA	1	NA	NA	NA	NA	NA	NA	NA	NA	NA	NA	NA	NA	NA	NA	NA	NA	NA	NA
MICU3	mitochondrial calcium uptake family member 3	286097	ENSG00000155970	HGNC:27820	DKFZp313A0139	EFHA2	08p22	protein-coding gene	Q86XE3	0.83033	0.84062	0.83033	0	0	NA	NA|NA|NA	0	NA	NA|NA|NA	0	NA	NA|NA|NA	0	NA	NA|NA|NA	0	NA	NA|NA|NA	0	NA	NA	NA	NA	NA	NA	NA	NA	NA	NA	NA	NA	NA	NA	NA	NA	NA	NA	NA	NA
MORF4L2	mortality factor 4 like 2	9643	ENSG00000123562	HGNC:16849	KIAA0026|MRGX		Xq22.2	protein-coding gene	Q15014	NA	NA	NA	NA	0	NA	NA|NA|NA	0	NA	NA|NA|NA	0	NA	NA|NA|NA	0	NA	NA|NA|NA	0	NA	NA|NA|NA	0	NA	NA	NA	NA	NA	NA	NA	NA	NA	NA	NA	NA	NA	NA	NA	NA	NA	NA	NA	NA
MPO	myeloperoxidase	4353	ENSG00000005381	HGNC:7218			17q22	protein-coding gene	P05164	0.06657	0.025091	0.025091	0	0	NA	NA|NA|NA	0	NA	NA|NA|NA	0	NA	NA|NA|NA	0	NA	NA|NA|NA	0	NA	NA|NA|NA	0	NA	NA	NA	NA	NA	NA	NA	NA	NA	NA	NA	NA	NA	1	NA	NA	NA	NA	NA	NA
MPPE1	metallophosphoesterase 1	65258	ENSG00000154889	HGNC:15988	PGAP5|Cdc1		18p11.21	protein-coding gene	Q53F39	0.12051	0.53092	0.12051	0	0	NA	NA|NA|NA	0	NA	NA|NA|NA	0	NA	NA|NA|NA	0	NA	NA|NA|NA	0	NA	NA|NA|NA	0	NA	1	NA	NA	NA	NA	NA	NA	NA	NA	NA	NA	NA	NA	NA	NA	NA	NA	NA	NA
MPV17	mitochondrial inner membrane protein MPV17	4358	ENSG00000115204	HGNC:7224	SYM1		02p23.3	protein-coding gene	P39210	0.57921	0.72291	0.57921	0	0	NA	NA|NA|NA	0	NA	NA|NA|NA	0	NA	NA|NA|NA	0	NA	NA|NA|NA	0	NA	NA|NA|NA	0	NA	NA	NA	NA	NA	NA	NA	NA	NA	NA	NA	NA	NA	NA	NA	NA	NA	0	1	NA
MRPL40	mitochondrial ribosomal protein L40	64976	ENSG00000185608	HGNC:14491	MRP-L22	NLVCF	22q11.21	protein-coding gene	Q9NQ50	0.64876	0.78842	0.64876	0	0	NA	NA|NA|NA	0	NA	NA|NA|NA	0	NA	NA|NA|NA	0	NA	NA|NA|NA	0	NA	NA|NA|NA	0	NA	NA	NA	NA	NA	NA	NA	NA	NA	NA	NA	NA	NA	NA	NA	NA	NA	NA	NA	NA
MRTFA	myocardin related transcription factor A	57591	ENSG00000196588	HGNC:14334	KIAA1438|MAL|MRTF-A|BSAC|MKL	MKL1	22q13.1-q13.2	protein-coding gene	Q969V6	0.73531	0.36743	0.36743	0	0	NA	NA|NA|NA	0	NA	NA|NA|NA	0	NA	NA|NA|NA	1	eQTL	0|eQTLGen_cis_eQTLs:GTEx/v8/Whole_Blood|NA	0	NA	NA|NA|NA	1	1	NA	NA	NA	NA	NA	NA	NA	NA	NA	NA	NA	NA	NA	NA	NA	NA	NA	NA	NA
MTIF3	mitochondrial translational initiation factor 3	219402	ENSG00000122033	HGNC:29788	IF-3mt|IF3(mt)		13q12.2	protein-coding gene	Q9H2K0	0.47011	0.57578	0.47011	0	0	NA	NA|NA|NA	0	NA	NA|NA|NA	0	NA	NA|NA|NA	1	CI	0|NA|GM12878:IMR90:Mesenchymal_Stem_Cell:Mesendoderm	1	CI	0|NA|IMR90:Mesenchymal_Stem_Cell:Mesendoderm	2	1	NA	NA	NA	NA	NA	NA	NA	NA	NA	NA	NA	NA	NA	NA	NA	NA	NA	NA	NA
MTRFR	mitochondrial translation release factor in rescue	91574	ENSG00000130921	HGNC:26784	FLJ38663|SPG55|COXPD7	C12orf65	12q24.31	protein-coding gene	Q9H3J6	0.00029044	0.00074863	0.00029044	1	0	NA	NA|NA|NA	0	NA	NA|NA|NA	0	NA	NA|NA|NA	0	NA	NA|NA|NA	0	NA	NA|NA|NA	0	NA	NA	NA	NA	NA	NA	NA	NA	NA	NA	NA	NA	NA	NA	NA	NA	NA	NA	NA	NA
MTUS2	microtubule associated scaffold protein 2	23281	ENSG00000132938	HGNC:20595	TIP150|CAZIP|ICIS	KIAA0774	13q12.3	protein-coding gene	Q5JR59	0.14727	0.11193	0.11193	0	0	NA	NA|NA|NA	0	NA	NA|NA|NA	0	NA	NA|NA|NA	1	eQTL	0|GTEx/v8/Esophagus_Muscularis|NA	1	eQTL	0|GTEx/v8/Esophagus_Muscularis|NA	2	1	NA	NA	NA	NA	NA	NA	NA	NA	NA	NA	NA	NA	NA	NA	NA	NA	NA	NA	NA
MYO10	myosin X	4651	ENSG00000145555	HGNC:7593	KIAA0799|MyoX		05p15.1	protein-coding gene	Q9HD67	0.063747	0.14676	0.063747	0	0	NA	NA|NA|NA	0	NA	NA|NA|NA	0	NA	NA|NA|NA	0	NA	NA|NA|NA	0	NA	NA|NA|NA	0	NA	NA	NA	NA	NA	NA	NA	NA	NA	NA	NA	NA	NA	NA	NA	NA	NA	NA	NA	NA
NAALAD2	N-acetylated alpha-linked acidic dipeptidase 2	10003	ENSG00000077616	HGNC:14526	NAALADASE2|GCPIII		11q14.3	protein-coding gene	Q9Y3Q0	0.30058	0.30522	0.30058	0	0	NA	NA|NA|NA	0	NA	NA|NA|NA	0	NA	NA|NA|NA	0	NA	NA|NA|NA	0	NA	NA|NA|NA	0	NA	NA	NA	NA	NA	NA	NA	NA	NA	NA	NA	NA	NA	NA	NA	NA	NA	NA	NA	NA
NARS2	asparaginyl-tRNA synthetase 2, mitochondrial	79731	ENSG00000137513	HGNC:26274	FLJ23441|SLM5	DFNB94	11q14.1	protein-coding gene	Q96I59	0.77672	0.93217	0.77672	0	1	eQTL	0|PsychENCODE_eQTLs|NA	0	NA	NA|NA|NA	0	NA	NA|NA|NA	1	eQTL	0|PsychENCODE_eQTLs|NA	0	NA	NA|NA|NA	2	1	NA	NA	NA	NA	NA	NA	NA	NA	NA	NA	NA	NA	NA	NA	NA	NA	NA	NA	NA
NAT8L	N-acetyltransferase 8 like	339983	ENSG00000185818	HGNC:26742	FLJ37478|Hcml3|Shati		04p16.3	protein-coding gene	Q8N9F0	0.9724	0.87877	0.87877	0	0	NA	NA|NA|NA	0	NA	NA|NA|NA	0	NA	NA|NA|NA	1	CI	0|NA|IMR90	0	NA	NA|NA|NA	1	1	NA	NA	NA	NA	NA	NA	NA	NA	NA	NA	NA	NA	NA	NA	NA	NA	NA	NA	NA
NDUFA6	NADH:ubiquinone oxidoreductase subunit A6	4700	ENSG00000184983	HGNC:7690	B14|LYRM6|CI-B14|NADHB14		22q13.2	protein-coding gene	P56556	0.20008	0.14556	0.14556	0	0	NA	NA|NA|NA	0	NA	NA|NA|NA	0	NA	NA|NA|NA	1	eQTL	0|eQTLcatalogue/Fairfax_2014_naive:eQTLGen_cis_eQTLs:GTEx/v8/Adipose_Subcutaneous:GTEx/v8/Artery_Tibial:GTEx/v8/Colon_Sigmoid:GTEx/v8/Muscle_Skeletal:GTEx/v8/Nerve_Tibial:GTEx/v8/Prostate:GTEx/v8/Cells_Cultured_fibroblasts:GTEx/v8/Stomach:GTEx/v8/Thyroid|NA	1	eQTL	0|eQTLGen_cis_eQTLs:GTEx/v8/Adipose_Subcutaneous:GTEx/v8/Artery_Tibial:GTEx/v8/Muscle_Skeletal:GTEx/v8/Nerve_Tibial:GTEx/v8/Cells_Cultured_fibroblasts|NA	2	1	NA	NA	NA	NA	NA	NA	NA	NA	NA	NA	NA	NA	NA	NA	NA	NA	NA	NA	NA
NDUFB1	NADH:ubiquinone oxidoreductase subunit B1	4707	ENSG00000183648	HGNC:7695	MNLL|CI-MNLL		14q31.3	protein-coding gene	O75438	0.63056	0.99142	0.63056	0	0	NA	NA|NA|NA	0	NA	NA|NA|NA	0	NA	NA|NA|NA	0	NA	NA|NA|NA	0	NA	NA|NA|NA	0	NA	NA	NA	NA	NA	NA	NA	NA	NA	NA	NA	NA	NA	NA	NA	NA	NA	NA	NA	NA
NGEF	neuronal guanine nucleotide exchange factor	25791	ENSG00000066248	HGNC:7807	ARHGEF27		02q37.1	protein-coding gene	Q8N5V2	0.0043767	0.014028	0.0043767	0	0	NA	NA|NA|NA	0	NA	NA|NA|NA	0	NA	NA|NA|NA	0	NA	NA|NA|NA	0	NA	NA|NA|NA	0	NA	NA	NA	NA	NA	1	NA	NA	NA	1	1	1	1	NA	NA	NA	NA	NA	NA	NA
NLGN3	neuroligin 3	54413	ENSG00000196338	HGNC:14289	HNL3|KIAA1480|ASPGX1|AUTSX1		Xq13.1	protein-coding gene	Q9NZ94	NA	NA	NA	NA	0	NA	NA|NA|NA	0	NA	NA|NA|NA	0	NA	NA|NA|NA	0	NA	NA|NA|NA	0	NA	NA|NA|NA	0	NA	NA	NA	NA	NA	NA	NA	NA	NA	NA	NA	NA	NA	NA	NA	NA	NA	NA	NA	NA
NOTCH1	notch receptor 1	4851	ENSG00000148400	HGNC:7881		TAN1	09q34.3	protein-coding gene	P46531	0.934	0.87991	0.87991	0	0	NA	NA|NA|NA	0	NA	NA|NA|NA	0	NA	NA|NA|NA	0	NA	NA|NA|NA	0	NA	NA|NA|NA	0	NA	NA	NA	NA	NA	NA	NA	NA	NA	NA	NA	NA	NA	NA	NA	NA	NA	NA	NA	NA
NOTCH2NLA	notch 2 N-terminal like A	388677	ENSG00000264343	HGNC:31862	N2N	NOTCH2NL	01q21.1	protein-coding gene	Q7Z3S9	NA	0.026086	0.026086	0	0	NA	NA|NA|NA	0	NA	NA|NA|NA	0	NA	NA|NA|NA	0	NA	NA|NA|NA	0	NA	NA|NA|NA	0	NA	NA	NA	NA	NA	NA	NA	NA	NA	NA	NA	NA	NA	NA	NA	NA	NA	NA	NA	NA
NPRL2	NPR2 like, GATOR1 complex subunit	10641	ENSG00000114388	HGNC:24969	NPR2L|NPR2	TUSC4	03p21.31	protein-coding gene	Q8WTW4	0.0004351	0.37885	0.0004351	1	0	NA	NA|NA|NA	0	NA	NA|NA|NA	0	NA	NA|NA|NA	0	NA	NA|NA|NA	0	NA	NA|NA|NA	0	NA	NA	NA	NA	NA	NA	NA	NA	NA	NA	NA	NA	NA	NA	NA	NA	NA	NA	NA	NA
NPTN	neuroplastin	27020	ENSG00000156642	HGNC:17867	SDR1|GP55|GP65|np65|np55	SDFR1	15q24.1	protein-coding gene	Q9Y639	0.06249	0.021085	0.021085	0	1	CI	0|NA|Adult_Cortex	0	NA	NA|NA|NA	0	NA	NA|NA|NA	1	CI	0|NA|Adult_Cortex	0	NA	NA|NA|NA	2	1	NA	NA	NA	NA	NA	NA	NA	NA	NA	NA	NA	NA	NA	NA	NA	NA	NA	NA	NA
NR1H2	nuclear receptor subfamily 1 group H member 2	7376	ENSG00000131408	HGNC:7965	NER|NER-I|RIP15|LXR-b|LXRb	UNR	19q13.3	protein-coding gene	P55055	0.0022599	0.00018968	0.00018968	1	0	NA	NA|NA|NA	0	NA	NA|NA|NA	0	NA	NA|NA|NA	0	NA	NA|NA|NA	0	NA	NA|NA|NA	0	NA	NA	NA	NA	NA	NA	NA	NA	NA	NA	NA	NA	NA	NA	NA	NA	NA	NA	NA	NA
NRCAM	neuronal cell adhesion molecule	4897	ENSG00000091129	HGNC:7994	KIAA0343|Bravo		07q31.1	protein-coding gene	Q92823	0.18853	0.27293	0.18853	0	0	NA	NA|NA|NA	0	NA	NA|NA|NA	0	NA	NA|NA|NA	0	NA	NA|NA|NA	0	NA	NA|NA|NA	0	NA	NA	NA	NA	NA	NA	NA	NA	NA	NA	NA	NA	NA	NA	NA	NA	NA	NA	NA	NA
NSD3	nuclear receptor binding SET domain protein 3	54904	ENSG00000147548	HGNC:12767	FLJ20353|WHISTLE|KMT3F	WHSC1L1	08p11.23	protein-coding gene	Q9BZ95	0.057782	0.071721	0.057782	0	0	NA	NA|NA|NA	0	NA	NA|NA|NA	0	NA	NA|NA|NA	0	NA	NA|NA|NA	0	NA	NA|NA|NA	0	NA	NA	NA	NA	NA	1	NA	NA	NA	1	1	1	1	NA	NA	NA	NA	NA	NA	NA
NUCB2	nucleobindin 2	4925	ENSG00000070081	HGNC:8044	NEFA		11p15.1	protein-coding gene	P80303	0.03712	0.12386	0.03712	0	0	NA	NA|NA|NA	0	NA	NA|NA|NA	0	NA	NA|NA|NA	0	NA	NA|NA|NA	0	NA	NA|NA|NA	0	NA	NA	NA	NA	1	NA	NA	NA	NA	1	1	1	1	NA	NA	NA	NA	NA	NA	NA
NUP85	nucleoporin 85	79902	ENSG00000125450	HGNC:8734	NUP75|FLJ12549		17q25.1	protein-coding gene	Q9BW27	0.056528	0.12498	0.056528	0	0	NA	NA|NA|NA	0	NA	NA|NA|NA	0	NA	NA|NA|NA	0	NA	NA|NA|NA	0	NA	NA|NA|NA	0	NA	NA	NA	NA	NA	NA	NA	NA	NA	NA	NA	NA	NA	NA	NA	NA	NA	0	1	NA
NXPH1	neurexophilin 1	30010	ENSG00000122584	HGNC:20693			07p21.3	protein-coding gene	P58417	0.21214	0.24673	0.21214	0	0	NA	NA|NA|NA	0	NA	NA|NA|NA	0	NA	NA|NA|NA	1	CI	0|NA|Left_Ventricle:Liver:IMR90:Mesenchymal_Stem_Cell:Mesendoderm:Neural_Progenitor_Cell:Trophoblast-like_Cell:hESC	0	NA	NA|NA|NA	1	1	NA	NA	NA	NA	NA	NA	NA	NA	NA	NA	NA	NA	NA	NA	NA	NA	NA	NA	NA
OAS3	2'-5'-oligoadenylate synthetase 3	4940	ENSG00000111331	HGNC:8088			12q24.13	protein-coding gene	Q9Y6K5	0.58407	0.70293	0.58407	0	0	NA	NA|NA|NA	0	NA	NA|NA|NA	0	NA	NA|NA|NA	0	NA	NA|NA|NA	0	NA	NA|NA|NA	0	NA	NA	NA	NA	NA	NA	NA	NA	NA	NA	NA	NA	NA	NA	NA	NA	NA	NA	NA	NA
ODF2L	outer dense fiber of sperm tails 2 like	57489	ENSG00000122417	HGNC:29225	KIAA1229		01p22.3	protein-coding gene	Q9ULJ1	0.76406	0.71002	0.71002	0	0	NA	NA|NA|NA	0	NA	NA|NA|NA	0	NA	NA|NA|NA	1	CI	0|NA|Left_Ventricle:Mesendoderm	1	CI	0|NA|Left_Ventricle:Mesendoderm	2	1	NA	NA	NA	NA	NA	NA	NA	NA	NA	NA	NA	NA	NA	NA	NA	NA	NA	NA	NA
OLFM1	olfactomedin 1	10439	ENSG00000130558	HGNC:17187	NOE1|OlfA|AMY|NOELIN		09q34.3	protein-coding gene	Q99784	0.025675	0.036784	0.025675	0	0	NA	NA|NA|NA	0	NA	NA|NA|NA	0	NA	NA|NA|NA	0	NA	NA|NA|NA	0	NA	NA|NA|NA	0	NA	NA	NA	NA	NA	NA	NA	NA	NA	NA	NA	NA	NA	NA	NA	NA	NA	NA	NA	NA
OPA1	OPA1 mitochondrial dynamin like GTPase	4976	ENSG00000198836	HGNC:8140	NTG|KIAA0567|FLJ12460|NPG|MGM1		03q29	protein-coding gene	O60313	0.72958	0.70477	0.70477	0	0	NA	NA|NA|NA	0	NA	NA|NA|NA	0	NA	NA|NA|NA	0	NA	NA|NA|NA	0	NA	NA|NA|NA	0	NA	NA	NA	NA	NA	NA	NA	NA	NA	NA	NA	NA	NA	NA	NA	NA	NA	NA	NA	NA
OPRD1	opioid receptor delta 1	4985	ENSG00000116329	HGNC:8153			01p35.3	protein-coding gene	P41143	0.059277	0.013889	0.013889	0	0	NA	NA|NA|NA	0	NA	NA|NA|NA	0	NA	NA|NA|NA	1	eQTL	0|GTEx/v8/Testis|NA	1	eQTL	0|GTEx/v8/Testis|NA	2	1	NA	NA	NA	NA	NA	NA	NA	NA	NA	NA	NA	NA	NA	NA	NA	NA	NA	NA	NA
OSBPL2	oxysterol binding protein like 2	9885	ENSG00000130703	HGNC:15761	KIAA0772|ORP-2|DFNA67		20q13.33	protein-coding gene	Q9H1P3	0.0027893	0.0005115	0.0005115	1	0	NA	NA|NA|NA	0	NA	NA|NA|NA	0	NA	NA|NA|NA	0	NA	NA|NA|NA	0	NA	NA|NA|NA	0	NA	NA	NA	NA	NA	NA	NA	NA	NA	NA	NA	NA	NA	NA	NA	NA	NA	NA	NA	NA
OXNAD1	oxidoreductase NAD binding domain containing 1	92106	ENSG00000154814	HGNC:25128	MGC15763		03p25.1-p24.3	protein-coding gene	Q96HP4	0.012383	0.0247	0.012383	0	0	NA	NA|NA|NA	0	NA	NA|NA|NA	0	NA	NA|NA|NA	0	NA	NA|NA|NA	0	NA	NA|NA|NA	0	NA	1	NA	NA	NA	NA	NA	NA	NA	NA	NA	NA	NA	NA	NA	NA	NA	NA	NA	NA
PARK7	Parkinsonism associated deglycase	11315	ENSG00000116288	HGNC:16369	DJ-1|DJ1|GATD2		01p36.23	protein-coding gene	Q99497	0.72794	0.92716	0.72794	0	0	NA	NA|NA|NA	0	NA	NA|NA|NA	0	NA	NA|NA|NA	0	NA	NA|NA|NA	0	NA	NA|NA|NA	0	NA	NA	1	1	NA	NA	NA	NA	NA	1	1	1	1	NA	NA	NA	NA	NA	NA	NA
PCDH12	protocadherin 12	51294	ENSG00000113555	HGNC:8657			05q31.3	protein-coding gene	Q9NPG4	0.74185	0.30247	0.30247	0	0	NA	NA|NA|NA	0	NA	NA|NA|NA	0	NA	NA|NA|NA	0	NA	NA|NA|NA	0	NA	NA|NA|NA	0	NA	NA	NA	NA	NA	NA	NA	NA	NA	NA	NA	NA	NA	NA	NA	NA	NA	NA	NA	NA
PCDH17	protocadherin 17	27253	ENSG00000118946	HGNC:14267	PCDH68|PCH68		13q21.1	protein-coding gene	O14917	0.002852	0.00028516	0.00028516	1	0	NA	NA|NA|NA	0	NA	NA|NA|NA	0	NA	NA|NA|NA	0	NA	NA|NA|NA	0	NA	NA|NA|NA	0	NA	NA	NA	NA	NA	NA	NA	NA	NA	NA	NA	NA	NA	NA	NA	NA	NA	NA	NA	NA
PDE4A	phosphodiesterase 4A	5141	ENSG00000065989	HGNC:8780		DPDE2	19p13.2	protein-coding gene	P27815	0.096088	0.10449	0.096088	0	0	NA	NA|NA|NA	0	NA	NA|NA|NA	0	NA	NA|NA|NA	0	NA	NA|NA|NA	0	NA	NA|NA|NA	0	NA	NA	NA	NA	NA	NA	NA	NA	NA	NA	NA	NA	NA	NA	NA	NA	NA	NA	NA	NA
PEX11B	peroxisomal biogenesis factor 11 beta	8799	ENSG00000131779	HGNC:8853	PEX11beta|PEX11√é¬≤		01q21.1	protein-coding gene	O96011	0.22079	0.0026194	0.0026194	0	0	NA	NA|NA|NA	0	NA	NA|NA|NA	0	NA	NA|NA|NA	0	NA	NA|NA|NA	0	NA	NA|NA|NA	0	NA	NA	NA	NA	NA	NA	NA	NA	NA	NA	NA	NA	NA	NA	NA	NA	NA	NA	NA	NA
PEX2	peroxisomal biogenesis factor 2	5828	ENSG00000164751	HGNC:9717	PMP35|PAF-1|RNF72|ZWS3	PXMP3	08q21.13	protein-coding gene	P28328	0.089365	0.0033723	0.0033723	0	0	NA	NA|NA|NA	0	NA	NA|NA|NA	0	NA	NA|NA|NA	0	NA	NA|NA|NA	0	NA	NA|NA|NA	0	NA	NA	NA	NA	NA	NA	NA	NA	NA	NA	NA	NA	NA	1	NA	NA	NA	NA	NA	NA
PHF5A	PHD finger protein 5A	84844	ENSG00000100410	HGNC:18000	MGC1346|SF3b14b|INI|bK223H9.2|Rds3|SAP14b|SF3B7		22q13.2	protein-coding gene	Q7RTV0	0.020521	0.022345	0.020521	0	1	CI	0|NA|Fetal_Cortex	1	CI	0|NA|Fetal_Cortex	1	CI	0|NA|Fetal_Cortex	1	eQTL,CI	0|eQTLGen_cis_eQTLs|Fetal_Cortex	1	CI	0|NA|Fetal_Cortex	4	1	NA	NA	NA	NA	NA	NA	NA	NA	NA	NA	NA	NA	NA	NA	NA	NA	NA	NA	NA
PI4KA	phosphatidylinositol 4-kinase alpha	5297	ENSG00000241973	HGNC:8983	PI4K-ALPHA|pi4K230	PIK4CA	22q11.21	protein-coding gene	P42356	0.8505	0.94477	0.8505	0	0	NA	NA|NA|NA	0	NA	NA|NA|NA	0	NA	NA|NA|NA	0	NA	NA|NA|NA	0	NA	NA|NA|NA	0	NA	NA	NA	NA	NA	NA	NA	NA	NA	NA	NA	NA	NA	NA	NA	NA	NA	NA	NA	NA
PIAS3	protein inhibitor of activated STAT 3	10401	ENSG00000131788	HGNC:16861	FLJ14651|ZMIZ5		01q21.1	protein-coding gene	Q9Y6X2	NA	0.0015954	0.0015954	0	0	NA	NA|NA|NA	0	NA	NA|NA|NA	0	NA	NA|NA|NA	0	NA	NA|NA|NA	0	NA	NA|NA|NA	0	NA	1	NA	NA	NA	NA	NA	NA	NA	NA	NA	NA	NA	NA	NA	NA	NA	NA	NA	NA
PIAS4	protein inhibitor of activated STAT 4	51588	ENSG00000105229	HGNC:17002	Piasg|PIASY|FLJ12419|ZMIZ6		19p13.3	protein-coding gene	Q8N2W9	0.0020524	0.00097711	0.00097711	1	0	NA	NA|NA|NA	0	NA	NA|NA|NA	0	NA	NA|NA|NA	0	NA	NA|NA|NA	0	NA	NA|NA|NA	0	NA	NA	NA	NA	NA	NA	NA	NA	NA	NA	NA	NA	NA	NA	NA	NA	NA	NA	NA	NA
PIWIL1	piwi like RNA-mediated gene silencing 1	9271	ENSG00000125207	HGNC:9007	PIWI|HIWI|CT80.1		12q24.33	protein-coding gene	Q96J94	0.42154	0.62662	0.42154	0	0	NA	NA|NA|NA	0	NA	NA|NA|NA	0	NA	NA|NA|NA	0	NA	NA|NA|NA	0	NA	NA|NA|NA	0	NA	NA	NA	NA	NA	NA	NA	NA	NA	NA	NA	NA	NA	NA	NA	NA	NA	NA	NA	NA
PKN2	protein kinase N2	5586	ENSG00000065243	HGNC:9406	PRK2|Pak-2|STK7	PRKCL2	01p22.2	protein-coding gene	Q16513	0.28534	0.44451	0.28534	0	0	NA	NA|NA|NA	0	NA	NA|NA|NA	0	NA	NA|NA|NA	1	CI	0|NA|IMR90:Mesenchymal_Stem_Cell:Mesendoderm:hESC	1	CI	0|NA|IMR90:Mesenchymal_Stem_Cell:Mesendoderm:hESC	2	1	NA	NA	NA	NA	NA	NA	NA	NA	NA	NA	NA	NA	NA	NA	NA	NA	NA	NA	NA
PLA2R1	phospholipase A2 receptor 1	22925	ENSG00000153246	HGNC:9042	PLA2G1R|PLA2IR|PLA2-R|CLEC13C		02q23-q24	protein-coding gene	Q13018	0.15316	0.12405	0.12405	0	1	Positional	52|NA|NA	1	Positional	1|NA|NA	1	Positional	1|NA|NA	1	Positional,eQTL	52|GTEx/v8/Adipose_Visceral_Omentum:GTEx/v8/Artery_Aorta:GTEx/v8/Artery_Tibial:GTEx/v8/Colon_Transverse:GTEx/v8/Esophagus_Muscularis:GTEx/v8/Lung:GTEx/v8/Muscle_Skeletal:GTEx/v8/Cells_Cultured_fibroblasts:GTEx/v8/Skin_Not_Sun_Exposed_Suprapubic:GTEx/v8/Skin_Sun_Exposed_Lower_leg|Left_Ventricle:IMR90:Mesenchymal_Stem_Cell:Mesendoderm:Trophoblast-like_Cell:hESC	1	Positional,eQTL	1|GTEx/v8/Artery_Tibial:GTEx/v8/Esophagus_Muscularis:GTEx/v8/Muscle_Skeletal:GTEx/v8/Cells_Cultured_fibroblasts:GTEx/v8/Skin_Sun_Exposed_Lower_leg|Left_Ventricle:IMR90:Mesenchymal_Stem_Cell:Mesendoderm:Trophoblast-like_Cell:hESC	4	1	NA	NA	NA	NA	NA	NA	NA	NA	NA	NA	NA	NA	NA	NA	NA	NA	NA	NA	NA
POLG	DNA polymerase gamma, catalytic subunit	5428	ENSG00000140521	HGNC:9179	POLG1|POLGA		15q26.1	protein-coding gene	P54098	0.66261	0.33099	0.33099	0	0	NA	NA|NA|NA	0	NA	NA|NA|NA	0	NA	NA|NA|NA	0	NA	NA|NA|NA	0	NA	NA|NA|NA	0	NA	NA	NA	NA	NA	NA	NA	NA	NA	NA	NA	NA	NA	NA	NA	NA	NA	NA	NA	NA
POLR2I	RNA polymerase II subunit I	5438	ENSG00000105258	HGNC:9196	RPB9|hRPB14.5		19q13.12	protein-coding gene	P36954	0.001704	0.005264	0.001704	0	0	NA	NA|NA|NA	0	NA	NA|NA|NA	0	NA	NA|NA|NA	0	NA	NA|NA|NA	0	NA	NA|NA|NA	0	NA	1	NA	NA	NA	NA	NA	NA	NA	NA	NA	NA	NA	NA	NA	NA	NA	NA	NA	NA
POLR3C	RNA polymerase III subunit C	10623	ENSG00000186141	HGNC:30076	RPC62|RPC3|C82		01q21.1	protein-coding gene	Q9BUI4	0.00023478	0.00088698	0.00023478	1	0	NA	NA|NA|NA	0	NA	NA|NA|NA	0	NA	NA|NA|NA	0	NA	NA|NA|NA	0	NA	NA|NA|NA	0	NA	NA	NA	NA	NA	NA	NA	NA	NA	NA	NA	NA	NA	NA	NA	NA	NA	NA	NA	NA
POU4F2	POU class 4 homeobox 2	5458	ENSG00000151615	HGNC:9219	Brn-3b	BRN3B	04q31.22	protein-coding gene	Q12837	0.27986	0.41389	0.27986	0	0	NA	NA|NA|NA	0	NA	NA|NA|NA	0	NA	NA|NA|NA	0	NA	NA|NA|NA	0	NA	NA|NA|NA	0	NA	NA	NA	NA	NA	NA	NA	NA	NA	NA	NA	NA	NA	NA	NA	NA	NA	NA	NA	NA
PPP1R3B	protein phosphatase 1 regulatory subunit 3B	79660	ENSG00000173281	HGNC:14942	GL|FLJ14005|PPP1R4		08p23.1	protein-coding gene	Q86XI6	0.3107	0.7849	0.3107	0	0	NA	NA|NA|NA	0	NA	NA|NA|NA	0	NA	NA|NA|NA	0	NA	NA|NA|NA	0	NA	NA|NA|NA	0	NA	NA	NA	NA	NA	NA	NA	NA	NA	NA	NA	NA	NA	NA	NA	NA	NA	NA	NA	NA
PREPL	prolyl endopeptidase like	9581	ENSG00000138078	HGNC:30228	KIAA0436		02p21	protein-coding gene	Q4J6C6	0.23726	0.13137	0.13137	0	0	NA	NA|NA|NA	0	NA	NA|NA|NA	0	NA	NA|NA|NA	1	CI	0|NA|hESC	0	NA	NA|NA|NA	1	1	NA	NA	NA	NA	NA	NA	NA	NA	NA	NA	NA	NA	NA	NA	NA	NA	NA	NA	NA
PREX1	phosphatidylinositol-3,4,5-trisphosphate dependent Rac exchange factor 1	57580	ENSG00000124126	HGNC:32594	KIAA1415|P-REX1		20q13.13	protein-coding gene	Q8TCU6	0.028424	0.0078679	0.0078679	0	0	NA	NA|NA|NA	0	NA	NA|NA|NA	0	NA	NA|NA|NA	0	NA	NA|NA|NA	0	NA	NA|NA|NA	0	NA	1	NA	NA	NA	NA	NA	NA	NA	NA	NA	NA	NA	NA	NA	NA	NA	NA	NA	NA
PRMT1	protein arginine methyltransferase 1	3276	ENSG00000126457	HGNC:5187	HCP1|ANM1	HRMT1L2	19q13.33	protein-coding gene	Q99873	0.00024367	0.054133	0.00024367	1	0	NA	NA|NA|NA	0	NA	NA|NA|NA	0	NA	NA|NA|NA	0	NA	NA|NA|NA	0	NA	NA|NA|NA	0	NA	NA	NA	NA	NA	NA	NA	NA	NA	NA	NA	NA	NA	NA	NA	NA	NA	NA	NA	NA
PROKR2	prokineticin receptor 2	128674	ENSG00000101292	HGNC:15836	GPR73b|PKR2|GPRg2|dJ680N4.3	GPR73L1|KAL3	20p12.3	protein-coding gene	Q8NFJ6	0.54912	0.9116	0.54912	0	0	NA	NA|NA|NA	0	NA	NA|NA|NA	0	NA	NA|NA|NA	0	NA	NA|NA|NA	0	NA	NA|NA|NA	0	NA	NA	NA	NA	NA	NA	NA	NA	NA	NA	NA	NA	NA	NA	NA	NA	NA	NA	NA	NA
PSMD14	proteasome 26S subunit, non-ATPase 14	10213	ENSG00000115233	HGNC:16889	POH1|pad1|Rpn11		02q24.2	protein-coding gene	O00487	0.69715	0.41895	0.41895	0	1	Positional,CI	10|NA|Adult_Cortex:Fetal_Cortex	0	NA	NA|NA|NA	0	NA	NA|NA|NA	1	Positional,CI	10|NA|Adult_Cortex:Fetal_Cortex:GM12878:IMR90:Mesenchymal_Stem_Cell:Mesendoderm:Trophoblast-like_Cell:hESC	1	CI	0|NA|hESC	3	1	NA	NA	NA	NA	NA	NA	NA	NA	NA	NA	NA	NA	NA	NA	NA	NA	NA	NA	NA
PTPRN2	protein tyrosine phosphatase receptor type N2	5799	ENSG00000155093	HGNC:9677	KIAA0387|phogrin|ICAAR|IA-2beta		07q36.3	protein-coding gene	Q92932	0.70027	0.71457	0.70027	0	0	NA	NA|NA|NA	0	NA	NA|NA|NA	0	NA	NA|NA|NA	0	NA	NA|NA|NA	0	NA	NA|NA|NA	0	NA	NA	NA	NA	NA	NA	NA	NA	NA	NA	NA	NA	NA	NA	NA	NA	NA	NA	NA	NA
RANBP1	RAN binding protein 1	5902	ENSG00000099901	HGNC:9847	HTF9A		22q11.21	protein-coding gene	P43487	0.64629	0.76561	0.64629	0	0	NA	NA|NA|NA	0	NA	NA|NA|NA	0	NA	NA|NA|NA	0	NA	NA|NA|NA	0	NA	NA|NA|NA	0	NA	NA	NA	NA	NA	NA	NA	NA	NA	NA	NA	NA	NA	NA	NA	NA	NA	NA	NA	NA
RBFOX1	RNA binding fox-1 homolog 1	54715	ENSG00000078328	HGNC:18222	A2BP1|FOX-1|HRNBP1		16p13.3	protein-coding gene	Q9NWB1	0.023573	0.026571	0.023573	0	0	NA	NA|NA|NA	0	NA	NA|NA|NA	0	NA	NA|NA|NA	0	NA	NA|NA|NA	0	NA	NA|NA|NA	0	NA	NA	1	1	NA	NA	NA	NA	NA	1	1	1	1	NA	NA	NA	NA	NA	NA	NA
RCAN1	regulator of calcineurin 1	1827	ENSG00000159200	HGNC:3040		DSCR1	21q22.12	protein-coding gene	P53805	0.14945	0.027555	0.027555	0	0	NA	NA|NA|NA	0	NA	NA|NA|NA	0	NA	NA|NA|NA	0	NA	NA|NA|NA	0	NA	NA|NA|NA	0	NA	NA	NA	NA	NA	NA	NA	NA	NA	NA	NA	NA	NA	NA	NA	NA	NA	NA	NA	NA
RELN	reelin	5649	ENSG00000189056	HGNC:9957	RL|PRO1598		07q22.1	protein-coding gene	P78509	0.20351	0.15976	0.15976	0	0	NA	NA|NA|NA	0	NA	NA|NA|NA	0	NA	NA|NA|NA	0	NA	NA|NA|NA	0	NA	NA|NA|NA	0	NA	NA	NA	NA	NA	NA	NA	NA	NA	NA	NA	NA	NA	NA	NA	NA	NA	NA	NA	NA
RICTOR	RPTOR independent companion of MTOR complex 2	253260	ENSG00000164327	HGNC:28611	MGC39830|AVO3|PIA|KIAA1999		05p13.1	protein-coding gene	Q6R327	0.13566	0.39204	0.13566	0	0	NA	NA|NA|NA	0	NA	NA|NA|NA	0	NA	NA|NA|NA	0	NA	NA|NA|NA	0	NA	NA|NA|NA	0	NA	NA	NA	NA	NA	NA	NA	NA	NA	NA	NA	NA	NA	NA	NA	NA	NA	NA	NA	1
RIMS1	regulating synaptic membrane exocytosis 1	22999	ENSG00000079841	HGNC:17282	RIM|KIAA0340|RIM1	RAB3IP2|CORD7	06q13	protein-coding gene	Q86UR5	0.82423	0.92845	0.82423	0	0	NA	NA|NA|NA	0	NA	NA|NA|NA	0	NA	NA|NA|NA	0	NA	NA|NA|NA	0	NA	NA|NA|NA	0	NA	NA	0	1	NA	NA	NA	NA	NA	0	NA	1	1	NA	NA	NA	NA	NA	NA	NA
RNF4	ring finger protein 4	6047	ENSG00000063978	HGNC:10067	RES4-26|SNURF|SLX5		04p16.3	protein-coding gene	P78317	0.36349	0.0073973	0.0073973	0	1	Positional	2|NA|NA	0	NA	NA|NA|NA	0	NA	NA|NA|NA	1	Positional,eQTL	2|eQTLcatalogue/TwinsUK_ge_LCL:GTEx/v8/Cells_EBV-transformed_lymphocytes:GTEx/v8/Colon_Transverse:GTEx/v8/Esophagus_Muscularis|NA	0	NA	NA|NA|NA	2	1	NA	NA	NA	NA	NA	NA	NA	NA	NA	NA	NA	NA	NA	NA	NA	NA	NA	NA	NA
RNF41	ring finger protein 41	10193	ENSG00000181852	HGNC:18401	SBBI03|NRDP1		12q13.3	protein-coding gene	Q9H4P4	0.19285	0.019413	0.019413	0	0	NA	NA|NA|NA	0	NA	NA|NA|NA	0	NA	NA|NA|NA	0	NA	NA|NA|NA	0	NA	NA|NA|NA	0	NA	NA	NA	NA	NA	NA	NA	NA	NA	NA	NA	NA	NA	NA	NA	NA	NA	NA	NA	NA
RPA2	replication protein A2	6118	ENSG00000117748	HGNC:10290			01p35.3	protein-coding gene	P15927	0.025104	0.0091434	0.0091434	0	0	NA	NA|NA|NA	0	NA	NA|NA|NA	0	NA	NA|NA|NA	0	NA	NA|NA|NA	0	NA	NA|NA|NA	0	NA	1	NA	NA	NA	NA	NA	NA	NA	NA	NA	NA	NA	NA	NA	NA	NA	NA	NA	NA
RPS21	ribosomal protein S21	6227	ENSG00000171858	HGNC:10409	S21		20q13.33	protein-coding gene	P63220	0.02244	0.0009834	0.0009834	1	0	NA	NA|NA|NA	0	NA	NA|NA|NA	0	NA	NA|NA|NA	0	NA	NA|NA|NA	0	NA	NA|NA|NA	0	NA	NA	NA	NA	NA	NA	NA	NA	NA	NA	NA	NA	NA	NA	NA	NA	NA	NA	NA	NA
RTN4R	reticulon 4 receptor	65078	ENSG00000040608	HGNC:18601	NOGOR		22q11.21	protein-coding gene	Q9BZR6	0.25736	0.92417	0.25736	0	0	NA	NA|NA|NA	0	NA	NA|NA|NA	0	NA	NA|NA|NA	0	NA	NA|NA|NA	0	NA	NA|NA|NA	0	NA	NA	NA	NA	NA	NA	NA	NA	NA	NA	NA	NA	NA	NA	NA	NA	NA	NA	NA	NA
SCN5A	sodium voltage-gated channel alpha subunit 5	6331	ENSG00000183873	HGNC:10593	Nav1.5|LQT3|HB1|HBBD|PFHB1|IVF|HB2|HH1|SSS1|CDCD2|CMPD2|ICCD	CMD1E	03p22.2	protein-coding gene	Q14524	0.24792	0.74521	0.24792	0	0	NA	NA|NA|NA	0	NA	NA|NA|NA	0	NA	NA|NA|NA	0	NA	NA|NA|NA	0	NA	NA|NA|NA	0	NA	NA	NA	NA	NA	NA	NA	NA	NA	NA	NA	NA	NA	NA	NA	NA	NA	NA	NA	NA
SEL1L	SEL1L adaptor subunit of ERAD E3 ubiquitin ligase	6400	ENSG00000071537	HGNC:10717	IBD2|SEL1L1|Hrd3		14q31	protein-coding gene	Q9UBV2	0.57955	0.60488	0.57955	0	0	NA	NA|NA|NA	0	NA	NA|NA|NA	0	NA	NA|NA|NA	0	NA	NA|NA|NA	0	NA	NA|NA|NA	0	NA	NA	NA	NA	NA	NA	NA	NA	NA	NA	NA	NA	NA	NA	NA	NA	NA	NA	NA	NA
SELENOK	selenoprotein K	58515	ENSG00000113811	HGNC:30394	SELK		03p21.1	protein-coding gene	Q9Y6D0	0.34151	0.39645	0.34151	0	0	NA	NA|NA|NA	0	NA	NA|NA|NA	0	NA	NA|NA|NA	1	CI	0|NA|Mesenchymal_Stem_Cell	0	NA	NA|NA|NA	1	1	NA	NA	NA	NA	NA	NA	NA	NA	NA	NA	NA	NA	NA	NA	NA	NA	NA	NA	NA
SENP1	SUMO specific peptidase 1	29843	ENSG00000079387	HGNC:17927			12q13.11	protein-coding gene	Q9P0U3	0.0011044	0.0085297	0.0011044	0	0	NA	NA|NA|NA	0	NA	NA|NA|NA	0	NA	NA|NA|NA	0	NA	NA|NA|NA	0	NA	NA|NA|NA	0	NA	NA	NA	NA	NA	NA	NA	NA	NA	NA	NA	NA	NA	1	NA	NA	NA	NA	NA	NA
SERPINE2	serpin family E member 2	5270	ENSG00000135919	HGNC:8951	PN1|GDN|PNI|nexin	PI7	02q36.1	protein-coding gene	P07093	0.46837	0.25874	0.25874	0	0	NA	NA|NA|NA	0	NA	NA|NA|NA	0	NA	NA|NA|NA	0	NA	NA|NA|NA	0	NA	NA|NA|NA	0	NA	NA	NA	NA	NA	NA	NA	NA	NA	NA	NA	NA	NA	NA	NA	NA	NA	NA	NA	NA
SESN2	sestrin 2	83667	ENSG00000130766	HGNC:20746	SES2|DKFZp761M0212|HI95|SEST2		01p35.3	protein-coding gene	P58004	0.7677	0.53705	0.53705	0	0	NA	NA|NA|NA	0	NA	NA|NA|NA	0	NA	NA|NA|NA	1	CI	0|NA|Left_Ventricle	0	NA	NA|NA|NA	1	1	NA	NA	NA	NA	NA	NA	NA	NA	NA	NA	NA	NA	NA	NA	NA	NA	NA	NA	NA
SF3A2	splicing factor 3a subunit 2	8175	ENSG00000104897	HGNC:10766	SF3a66|SAP62|PRPF11|Prp11		19p13.3	protein-coding gene	Q15428	0.068655	0.53097	0.068655	0	0	NA	NA|NA|NA	0	NA	NA|NA|NA	0	NA	NA|NA|NA	0	NA	NA|NA|NA	0	NA	NA|NA|NA	0	NA	NA	NA	NA	NA	NA	NA	NA	NA	NA	NA	NA	NA	NA	NA	NA	NA	NA	NA	NA
SH3GLB1	SH3 domain containing GRB2 like, endophilin B1	51100	ENSG00000097033	HGNC:10833	CGI-61|KIAA0491|Bif-1|PPP1R70		01p22.3	protein-coding gene	Q9Y371	0.98869	0.90874	0.90874	0	0	NA	NA|NA|NA	0	NA	NA|NA|NA	0	NA	NA|NA|NA	1	CI	0|NA|Mesenchymal_Stem_Cell:Mesendoderm:Trophoblast-like_Cell:hESC	1	CI	0|NA|Mesenchymal_Stem_Cell:Mesendoderm:Trophoblast-like_Cell:hESC	2	1	NA	NA	NA	NA	NA	NA	NA	NA	NA	NA	NA	NA	NA	NA	NA	NA	NA	NA	NA
SLC24A2	solute carrier family 24 member 2	25769	ENSG00000155886	HGNC:10976	NCKX2		09p22.1	protein-coding gene	Q9UI40	0.0047806	0.00085959	0.00085959	1	0	NA	NA|NA|NA	0	NA	NA|NA|NA	0	NA	NA|NA|NA	0	NA	NA|NA|NA	0	NA	NA|NA|NA	0	NA	NA	NA	NA	NA	NA	NA	NA	NA	NA	NA	NA	NA	NA	NA	NA	NA	NA	NA	NA
SLC25A1	solute carrier family 25 member 1	6576	ENSG00000100075	HGNC:10979	CTP	SLC20A3	22q11.21	protein-coding gene	P53007	0.98293	0.95888	0.95888	0	0	NA	NA|NA|NA	0	NA	NA|NA|NA	0	NA	NA|NA|NA	0	NA	NA|NA|NA	0	NA	NA|NA|NA	0	NA	NA	NA	NA	NA	NA	NA	NA	NA	NA	NA	NA	NA	NA	NA	NA	NA	NA	NA	NA
SLC29A3	solute carrier family 29 member 3	55315	ENSG00000198246	HGNC:23096	ENT3|FLJ11160		10q22.1	protein-coding gene	Q9BZD2	0.62016	0.84684	0.62016	0	0	NA	NA|NA|NA	0	NA	NA|NA|NA	0	NA	NA|NA|NA	0	NA	NA|NA|NA	0	NA	NA|NA|NA	0	NA	NA	NA	NA	NA	NA	NA	NA	NA	NA	NA	NA	NA	NA	NA	NA	NA	NA	NA	NA
SLC30A6	solute carrier family 30 member 6	55676	ENSG00000152683	HGNC:19305	FLJ31101|ZNT6		02p22.3	protein-coding gene	Q6NXT4	0.016184	0.037854	0.016184	0	0	NA	NA|NA|NA	0	NA	NA|NA|NA	0	NA	NA|NA|NA	0	NA	NA|NA|NA	0	NA	NA|NA|NA	0	NA	1	NA	NA	NA	NA	NA	NA	NA	NA	NA	NA	NA	NA	NA	NA	NA	NA	NA	NA
SLC30A9	solute carrier family 30 member 9	10463	ENSG00000014824	HGNC:1329	HUEL|ZNT9|GAC63	C4orf1	04p13	protein-coding gene	Q6PML9	0.30434	0.23727	0.23727	0	0	NA	NA|NA|NA	0	NA	NA|NA|NA	0	NA	NA|NA|NA	0	NA	NA|NA|NA	0	NA	NA|NA|NA	0	NA	NA	1	1	NA	NA	NA	NA	NA	1	1	1	1	NA	NA	NA	NA	NA	NA	NA
SLC39A12	solute carrier family 39 member 12	221074	ENSG00000148482	HGNC:20860	FLJ30499		10p12.33	protein-coding gene	Q504Y0	0.013463	0.0068769	0.0068769	0	0	NA	NA|NA|NA	0	NA	NA|NA|NA	0	NA	NA|NA|NA	0	NA	NA|NA|NA	0	NA	NA|NA|NA	0	NA	1	NA	NA	NA	NA	NA	NA	NA	NA	NA	NA	NA	NA	NA	NA	NA	NA	NA	NA
SLC6A2	solute carrier family 6 member 2	6530	ENSG00000103546	HGNC:11048	NET	NET1|NAT1|SLC6A5	16q12.2	protein-coding gene	P23975	0.50013	0.48474	0.48474	0	0	NA	NA|NA|NA	0	NA	NA|NA|NA	0	NA	NA|NA|NA	0	NA	NA|NA|NA	0	NA	NA|NA|NA	0	NA	NA	NA	NA	NA	NA	NA	NA	NA	NA	NA	NA	NA	NA	NA	NA	NA	NA	NA	NA
SLC6A4	solute carrier family 6 member 4	6532	ENSG00000108576	HGNC:11050	5-HTT|SERT1	HTT|OCD1	17q11.2	protein-coding gene	P31645	0.77357	0.26557	0.26557	0	0	NA	NA|NA|NA	0	NA	NA|NA|NA	0	NA	NA|NA|NA	0	NA	NA|NA|NA	0	NA	NA|NA|NA	0	NA	NA	NA	NA	NA	NA	NA	NA	NA	NA	NA	NA	NA	NA	NA	NA	NA	NA	NA	NA
SNAP29	synaptosome associated protein 29	9342	ENSG00000099940	HGNC:11133	SNAP-29|CEDNIK		22q11.21	protein-coding gene	O95721	0.93389	0.90763	0.90763	0	0	NA	NA|NA|NA	0	NA	NA|NA|NA	0	NA	NA|NA|NA	0	NA	NA|NA|NA	0	NA	NA|NA|NA	0	NA	NA	NA	NA	NA	NA	NA	NA	NA	NA	NA	NA	NA	NA	NA	NA	NA	NA	NA	NA
SNU13	small nuclear ribonucleoprotein 13	4809	ENSG00000100138	HGNC:7819	FA-1|SPAG12|SNRNP15-5|15.5K	SSFA1|NHP2L1	22q13.2	protein-coding gene	P55769	0.13705	0.15287	0.13705	0	0	NA	NA|NA|NA	0	NA	NA|NA|NA	0	NA	NA|NA|NA	1	eQTL	0|eQTLGen_cis_eQTLs|NA	0	NA	NA|NA|NA	1	1	NA	NA	NA	NA	NA	NA	NA	NA	NA	NA	NA	NA	NA	NA	NA	NA	NA	NA	NA
STING1	stimulator of interferon response cGAMP interactor 1	340061	ENSG00000184584	HGNC:27962	FLJ38577|NET23|ERIS|MPYS|STING|MITA	TMEM173	05q31.2	protein-coding gene	Q86WV6	0.0037759	0.00021213	0.00021213	1	0	NA	NA|NA|NA	0	NA	NA|NA|NA	0	NA	NA|NA|NA	0	NA	NA|NA|NA	0	NA	NA|NA|NA	0	NA	NA	NA	NA	NA	NA	NA	NA	NA	NA	NA	NA	NA	NA	NA	NA	NA	NA	NA	NA
SUGP1	SURP and G-patch domain containing 1	57794	ENSG00000105705	HGNC:18643	F23858|DKFZp434E2216|RBP	SF4	19p13.11	protein-coding gene	Q8IWZ8	0.11933	0.10869	0.10869	0	0	NA	NA|NA|NA	0	NA	NA|NA|NA	0	NA	NA|NA|NA	0	NA	NA|NA|NA	0	NA	NA|NA|NA	0	NA	NA	NA	NA	NA	NA	NA	NA	NA	NA	NA	NA	NA	NA	NA	NA	NA	NA	NA	NA
SULT4A1	sulfotransferase family 4A member 1	25830	ENSG00000130540	HGNC:14903	SULTX3|hBR-STL-1		22q13.31	protein-coding gene	Q9BR01	0.66295	0.80122	0.66295	0	0	NA	NA|NA|NA	0	NA	NA|NA|NA	0	NA	NA|NA|NA	0	NA	NA|NA|NA	0	NA	NA|NA|NA	0	NA	NA	NA	NA	NA	NA	NA	NA	NA	NA	NA	NA	NA	NA	NA	NA	NA	NA	NA	NA
SYT17	synaptotagmin 17	51760	ENSG00000103528	HGNC:24119	Syt-17		16p12.3	protein-coding gene	Q9BSW7	0.86765	0.47834	0.47834	0	0	NA	NA|NA|NA	0	NA	NA|NA|NA	0	NA	NA|NA|NA	0	NA	NA|NA|NA	0	NA	NA|NA|NA	0	NA	NA	NA	NA	NA	NA	NA	NA	NA	NA	NA	NA	NA	NA	NA	NA	NA	NA	NA	NA
TADA3	transcriptional adaptor 3	10474	ENSG00000171148	HGNC:19422	FLJ20221|FLJ21329|ADA3|hADA3|NGG1	TADA3L	03p25.3	protein-coding gene	O75528	0.43124	0.69501	0.43124	0	0	NA	NA|NA|NA	0	NA	NA|NA|NA	0	NA	NA|NA|NA	0	NA	NA|NA|NA	0	NA	NA|NA|NA	0	NA	NA	NA	NA	NA	NA	NA	NA	NA	NA	NA	NA	NA	NA	NA	NA	NA	NA	NA	NA
TANC1	tetratricopeptide repeat, ankyrin repeat and coiled-coil containing 1	85461	ENSG00000115183	HGNC:29364	KIAA1728|ROLSB		02q24.2	protein-coding gene	Q9C0D5	0.54156	0.18775	0.18775	0	0	NA	NA|NA|NA	0	NA	NA|NA|NA	0	NA	NA|NA|NA	1	eQTL,CI	0|GTEx/v8/Artery_Tibial:GTEx/v8/Skin_Sun_Exposed_Lower_leg|Left_Ventricle:Liver:GM12878:IMR90:Mesenchymal_Stem_Cell:Mesendoderm:Trophoblast-like_Cell:hESC	0	NA	NA|NA|NA	1	1	NA	NA	NA	NA	NA	NA	NA	NA	NA	NA	NA	NA	NA	NA	NA	NA	NA	NA	NA
TCF20	transcription factor 20	6942	ENSG00000100207	HGNC:11631	AR1|SPBP		22q13.2	protein-coding gene	Q9UGU0	0.35197	0.24327	0.24327	0	0	NA	NA|NA|NA	0	NA	NA|NA|NA	0	NA	NA|NA|NA	0	NA	NA|NA|NA	0	NA	NA|NA|NA	0	NA	NA	NA	NA	NA	1	NA	NA	NA	1	1	1	1	NA	NA	NA	NA	NA	NA	NA
TCOF1	treacle ribosome biogenesis factor 1	6949	ENSG00000070814	HGNC:11654	treacle|TCS		05q32-q33.1	protein-coding gene	Q13428	0.89476	0.90311	0.89476	0	0	NA	NA|NA|NA	0	NA	NA|NA|NA	0	NA	NA|NA|NA	0	NA	NA|NA|NA	0	NA	NA|NA|NA	0	NA	NA	NA	NA	NA	NA	NA	NA	NA	NA	NA	NA	NA	NA	NA	NA	NA	NA	NA	NA
TEAD2	TEA domain transcription factor 2	8463	ENSG00000074219	HGNC:11715	TEF-4|ETF|TEF4		19q13.33	protein-coding gene	Q15562	0.8118	0.54937	0.54937	0	0	NA	NA|NA|NA	0	NA	NA|NA|NA	0	NA	NA|NA|NA	0	NA	NA|NA|NA	0	NA	NA|NA|NA	0	NA	NA	NA	NA	NA	NA	NA	NA	NA	NA	NA	NA	NA	NA	NA	NA	NA	NA	NA	NA
TERF2IP	TERF2 interacting protein	54386	ENSG00000166848	HGNC:19246	RAP1		16q23.1	protein-coding gene	Q9NYB0	0.2742	0.22107	0.22107	0	0	NA	NA|NA|NA	0	NA	NA|NA|NA	0	NA	NA|NA|NA	1	CI	0|NA|IMR90:Mesenchymal_Stem_Cell:Mesendoderm:Trophoblast-like_Cell:hESC	0	NA	NA|NA|NA	1	1	NA	NA	NA	NA	NA	NA	NA	NA	NA	NA	NA	NA	NA	NA	NA	NA	NA	NA	NA
THAP7	THAP domain containing 7	80764	ENSG00000184436	HGNC:23190	MGC10963		22q11.21	protein-coding gene	Q9BT49	0.2539	0.94515	0.2539	0	0	NA	NA|NA|NA	0	NA	NA|NA|NA	0	NA	NA|NA|NA	0	NA	NA|NA|NA	0	NA	NA|NA|NA	0	NA	NA	NA	NA	NA	NA	NA	NA	NA	NA	NA	NA	NA	NA	NA	NA	NA	NA	NA	NA
TJP1	tight junction protein 1	7082	ENSG00000104067	HGNC:11827	ZO-1|MGC133289|DKFZp686M05161		15q13.1	protein-coding gene	Q07157	0.94009	0.9102	0.9102	0	0	NA	NA|NA|NA	0	NA	NA|NA|NA	0	NA	NA|NA|NA	0	NA	NA|NA|NA	0	NA	NA|NA|NA	0	NA	NA	NA	NA	NA	NA	NA	NA	NA	NA	NA	NA	NA	NA	NA	NA	NA	NA	NA	NA
TLN2	talin 2	83660	ENSG00000171914	HGNC:15447	KIAA0320|ILWEQ		15q22.2	protein-coding gene	Q9Y4G6	0.79462	0.26407	0.26407	0	0	NA	NA|NA|NA	0	NA	NA|NA|NA	0	NA	NA|NA|NA	0	NA	NA|NA|NA	0	NA	NA|NA|NA	0	NA	NA	NA	NA	NA	NA	NA	NA	NA	NA	NA	NA	NA	NA	NA	NA	NA	0	1	NA
TMEM231	transmembrane protein 231	79583	ENSG00000205084	HGNC:37234	FLJ22167|ALYE870|PRO1886|JBTS20|MKS11		16q23.1	protein-coding gene	Q9H6L2	0.26953	0.38527	0.26953	0	0	NA	NA|NA|NA	0	NA	NA|NA|NA	0	NA	NA|NA|NA	1	CI	0|NA|Mesenchymal_Stem_Cell	0	NA	NA|NA|NA	1	1	NA	NA	NA	NA	NA	NA	NA	NA	NA	NA	NA	NA	NA	NA	NA	NA	NA	NA	NA
TMEM33	transmembrane protein 33	55161	ENSG00000109133	HGNC:25541	FLJ10525|Pom33		04p13	protein-coding gene	P57088	0.8523	0.68879	0.68879	0	0	NA	NA|NA|NA	0	NA	NA|NA|NA	0	NA	NA|NA|NA	0	NA	NA|NA|NA	0	NA	NA|NA|NA	0	NA	NA	1	1	NA	NA	NA	NA	NA	1	1	1	1	NA	NA	NA	NA	NA	NA	NA
TNFAIP2	TNF alpha induced protein 2	7127	ENSG00000185215	HGNC:11895	B94|EXOC3L3		14q32.32	protein-coding gene	Q03169	0.67814	0.98565	0.67814	0	0	NA	NA|NA|NA	0	NA	NA|NA|NA	0	NA	NA|NA|NA	0	NA	NA|NA|NA	0	NA	NA|NA|NA	0	NA	NA	1	1	NA	NA	NA	NA	NA	1	1	1	1	NA	NA	NA	NA	NA	NA	NA
TNIK	TRAF2 and NCK interacting kinase	23043	ENSG00000154310	HGNC:30765	KIAA0551		03q26.2-q26.31	protein-coding gene	Q9UKE5	0.92861	0.89155	0.89155	0	0	NA	NA|NA|NA	0	NA	NA|NA|NA	0	NA	NA|NA|NA	0	NA	NA|NA|NA	0	NA	NA|NA|NA	0	NA	NA	NA	NA	NA	NA	NA	NA	NA	NA	NA	NA	NA	NA	NA	NA	NA	NA	NA	NA
TNIP2	TNFAIP3 interacting protein 2	79155	ENSG00000168884	HGNC:19118	ABIN-2|MGC4289|KLIP|FLIP1		04p16.3	protein-coding gene	Q8NFZ5	0.79014	0.91857	0.79014	0	1	eQTL	0|CMC_SVA_cis|NA	0	NA	NA|NA|NA	0	NA	NA|NA|NA	1	eQTL	0|CMC_SVA_cis|NA	0	NA	NA|NA|NA	2	1	NA	NA	NA	NA	NA	NA	NA	NA	NA	NA	NA	NA	NA	NA	NA	NA	NA	NA	NA
TNKS1BP1	tankyrase 1 binding protein 1	85456	ENSG00000149115	HGNC:19081	TAB182|KIAA1741|FLJ45975		11q12.1	protein-coding gene	Q9C0C2	0.27546	0.3852	0.27546	0	0	NA	NA|NA|NA	0	NA	NA|NA|NA	0	NA	NA|NA|NA	0	NA	NA|NA|NA	0	NA	NA|NA|NA	0	NA	NA	NA	NA	NA	NA	NA	NA	NA	NA	NA	NA	NA	NA	NA	NA	NA	NA	NA	NA
TNRC6A	trinucleotide repeat containing adaptor 6A	27327	ENSG00000090905	HGNC:11969	CAGH26|KIAA1460|GW182	TNRC6	16p12.1	protein-coding gene	Q8NDV7	0.79486	0.93105	0.79486	0	0	NA	NA|NA|NA	0	NA	NA|NA|NA	0	NA	NA|NA|NA	0	NA	NA|NA|NA	0	NA	NA|NA|NA	0	NA	NA	NA	NA	NA	NA	NA	NA	NA	NA	NA	NA	NA	NA	NA	NA	NA	NA	NA	0
TOR1A	torsin family 1 member A	1861	ENSG00000136827	HGNC:3098	DQ2	DYT1	09q34.11	protein-coding gene	O14656	0.23362	0.030368	0.030368	0	0	NA	NA|NA|NA	0	NA	NA|NA|NA	0	NA	NA|NA|NA	0	NA	NA|NA|NA	0	NA	NA|NA|NA	0	NA	1	NA	NA	NA	NA	NA	NA	NA	NA	NA	NA	NA	NA	NA	NA	NA	NA	NA	NA
TRAF3	TNF receptor associated factor 3	7187	ENSG00000131323	HGNC:12033	CAP-1|CD40bp|CRAF1|LAP1|RNF118		14q32.32	protein-coding gene	Q13114	0.15546	0.32106	0.15546	0	0	NA	NA|NA|NA	0	NA	NA|NA|NA	0	NA	NA|NA|NA	0	NA	NA|NA|NA	0	NA	NA|NA|NA	0	NA	NA	1	1	NA	NA	NA	NA	NA	1	1	1	1	NA	NA	NA	NA	NA	NA	NA
TRIP6	thyroid hormone receptor interactor 6	7205	ENSG00000087077	HGNC:12311	ZRP-1|OIP1|MGC10556|MGC10558|MGC29959|MGC3837|MGC4423		07q22.1	protein-coding gene	Q15654	0.12277	0.10653	0.10653	0	0	NA	NA|NA|NA	0	NA	NA|NA|NA	0	NA	NA|NA|NA	0	NA	NA|NA|NA	0	NA	NA|NA|NA	0	NA	NA	NA	NA	1	NA	NA	NA	NA	1	1	1	1	NA	NA	NA	NA	NA	NA	NA
TSPYL5	TSPY like 5	85453	ENSG00000180543	HGNC:29367	KIAA1750		08q22.1	protein-coding gene	Q86VY4	0.44337	0.3357	0.3357	0	0	NA	NA|NA|NA	0	NA	NA|NA|NA	0	NA	NA|NA|NA	0	NA	NA|NA|NA	0	NA	NA|NA|NA	0	NA	NA	NA	NA	NA	NA	NA	NA	1	1	1	1	1	NA	NA	NA	NA	NA	NA	NA
TTN	titin	7273	ENSG00000155657	HGNC:12403	CMPD4|FLJ32040|TMD|CMH9|LGMD2J|MYLK5	CMD1G	02q31.2	protein-coding gene	Q8WZ42	0.0293	0.022203	0.022203	0	0	NA	NA|NA|NA	0	NA	NA|NA|NA	0	NA	NA|NA|NA	0	NA	NA|NA|NA	0	NA	NA|NA|NA	0	NA	NA	NA	NA	NA	NA	NA	NA	NA	NA	NA	NA	NA	NA	NA	NA	NA	NA	NA	NA
TUBA1A	tubulin alpha 1a	7846	ENSG00000167552	HGNC:20766	TUBA3|B-ALPHA-1|FLJ25113		12q13.12	protein-coding gene	Q71U36	0.030743	0.0045379	0.0045379	0	0	NA	NA|NA|NA	0	NA	NA|NA|NA	0	NA	NA|NA|NA	1	CI	0|NA|IMR90:Mesenchymal_Stem_Cell	0	NA	NA|NA|NA	1	1	NA	NA	NA	NA	NA	NA	NA	NA	NA	NA	NA	NA	NA	NA	NA	NA	NA	NA	NA
TXNRD2	thioredoxin reductase 2	10587	ENSG00000184470	HGNC:18155	TR|TRXR2|TR3|SELZ		22q11.21	protein-coding gene	Q9NNW7	0.32734	0.5974	0.32734	0	0	NA	NA|NA|NA	0	NA	NA|NA|NA	0	NA	NA|NA|NA	0	NA	NA|NA|NA	0	NA	NA|NA|NA	0	NA	NA	NA	NA	NA	NA	NA	NA	NA	NA	NA	NA	NA	NA	NA	NA	NA	NA	NA	NA
UBE2J1	ubiquitin conjugating enzyme E2 J1	51465	ENSG00000198833	HGNC:17598	HSPC153|CGI-76|NCUBE1|UBC6		06q15	protein-coding gene	Q9Y385	0.79307	0.35833	0.35833	0	0	NA	NA|NA|NA	0	NA	NA|NA|NA	0	NA	NA|NA|NA	0	NA	NA|NA|NA	0	NA	NA|NA|NA	0	NA	1	NA	NA	NA	NA	NA	NA	NA	NA	NA	NA	NA	NA	NA	NA	NA	NA	NA	NA
UCHL1	ubiquitin C-terminal hydrolase L1	7345	ENSG00000154277	HGNC:12513	PGP9.5|Uch-L1	PARK5	04p13	protein-coding gene	P09936	0.28705	0.56432	0.28705	0	0	NA	NA|NA|NA	0	NA	NA|NA|NA	0	NA	NA|NA|NA	0	NA	NA|NA|NA	0	NA	NA|NA|NA	0	NA	NA	1	1	NA	NA	NA	NA	NA	1	1	1	1	NA	NA	NA	NA	NA	NA	NA
URB1	URB1 ribosome biogenesis homolog	9875	ENSG00000142207	HGNC:17344	KIAA0539|NPA1	C21orf108	21q22.11	protein-coding gene	O60287	0.62063	0.73693	0.62063	0	0	NA	NA|NA|NA	0	NA	NA|NA|NA	0	NA	NA|NA|NA	0	NA	NA|NA|NA	0	NA	NA|NA|NA	0	NA	NA	NA	NA	NA	NA	NA	NA	NA	NA	NA	NA	NA	NA	NA	NA	NA	NA	NA	NA
USP4	ubiquitin specific peptidase 4	7375	ENSG00000114316	HGNC:12627	Unph	UNP	03p21.31	protein-coding gene	Q13107	0.0075857	0.01889	0.0075857	0	0	NA	NA|NA|NA	0	NA	NA|NA|NA	0	NA	NA|NA|NA	0	NA	NA|NA|NA	0	NA	NA|NA|NA	0	NA	NA	NA	NA	NA	NA	1	1	NA	1	1	1	1	NA	NA	NA	NA	NA	NA	NA
VAMP7	vesicle associated membrane protein 7	6845	ENSG00000124333	HGNC:11486	VAMP-7|TI-VAMP	SYBL1	Xq28 and Yq12	protein-coding gene	P51809	NA	NA	NA	NA	0	NA	NA|NA|NA	0	NA	NA|NA|NA	0	NA	NA|NA|NA	0	NA	NA|NA|NA	0	NA	NA|NA|NA	0	NA	NA	NA	NA	NA	NA	NA	NA	NA	NA	NA	NA	NA	NA	NA	NA	NA	NA	NA	NA
VRK2	VRK serine/threonine kinase 2	7444	ENSG00000028116	HGNC:12719			02p16.1	protein-coding gene	Q86Y07	0.93319	0.85646	0.85646	0	0	NA	NA|NA|NA	0	NA	NA|NA|NA	0	NA	NA|NA|NA	1	CI	0|NA|Left_Ventricle:IMR90:Mesenchymal_Stem_Cell:Mesendoderm:hESC	0	NA	NA|NA|NA	1	1	NA	NA	NA	NA	NA	NA	NA	NA	NA	NA	NA	NA	NA	NA	NA	NA	NA	NA	NA
WNT1	Wnt family member 1	7471	ENSG00000125084	HGNC:12774		INT1	12q13.12	protein-coding gene	P04628	NA	0.091859	0.091859	0	0	NA	NA|NA|NA	0	NA	NA|NA|NA	0	NA	NA|NA|NA	1	CI	0|NA|IMR90	0	NA	NA|NA|NA	1	1	NA	NA	NA	NA	NA	NA	NA	NA	NA	NA	NA	NA	NA	NA	NA	NA	NA	NA	NA
WNT5A	Wnt family member 5A	7474	ENSG00000114251	HGNC:12784	hWNT5A		03p14.3	protein-coding gene	P41221	0.94858	0.9371	0.9371	0	0	NA	NA|NA|NA	0	NA	NA|NA|NA	0	NA	NA|NA|NA	1	CI	0|NA|Promoter_anchored_loops:Left_Ventricle:Liver:IMR90:Mesenchymal_Stem_Cell:Mesendoderm:Neural_Progenitor_Cell:Trophoblast-like_Cell:hESC	1	CI	0|NA|Left_Ventricle:Liver:IMR90:Mesenchymal_Stem_Cell:Mesendoderm:Neural_Progenitor_Cell:Trophoblast-like_Cell:hESC	2	1	NA	NA	NA	NA	NA	NA	NA	NA	NA	NA	NA	NA	NA	NA	NA	NA	NA	NA	NA
WWOX	WW domain containing oxidoreductase	51741	ENSG00000186153	HGNC:12799	FOR|WOX1|SDR41C1		16q23.1-q23.2	protein-coding gene	Q9NZC7	0.32795	0.47115	0.32795	0	0	NA	NA|NA|NA	0	NA	NA|NA|NA	0	NA	NA|NA|NA	1	CI	0|NA|IMR90:hESC	0	NA	NA|NA|NA	1	1	NA	NA	NA	NA	NA	NA	NA	NA	NA	NA	NA	NA	NA	NA	NA	NA	NA	NA	NA
YTHDF2	YTH N6-methyladenosine RNA binding protein 2	51441	ENSG00000198492	HGNC:31675	HGRG8|NY-REN-2|CAHL		01p35.3	protein-coding gene	Q9Y5A9	0.92363	0.19487	0.19487	0	0	NA	NA|NA|NA	0	NA	NA|NA|NA	0	NA	NA|NA|NA	1	CI	0|NA|GM12878:IMR90:Mesenchymal_Stem_Cell:Mesendoderm:Trophoblast-like_Cell	0	NA	NA|NA|NA	1	1	NA	NA	NA	NA	NA	NA	NA	NA	NA	NA	NA	NA	NA	NA	NA	NA	NA	NA	NA
ZDHHC11	zinc finger DHHC-type containing 11	79844	ENSG00000188818	HGNC:19158	ZNF399|FLJ13153		05p15.33	protein-coding gene	Q9H8X9	0.065871	0.22157	0.065871	0	0	NA	NA|NA|NA	0	NA	NA|NA|NA	0	NA	NA|NA|NA	0	NA	NA|NA|NA	0	NA	NA|NA|NA	0	NA	NA	NA	NA	NA	NA	NA	NA	NA	NA	NA	NA	NA	NA	NA	NA	NA	NA	NA	NA
ZDHHC17	zinc finger DHHC-type palmitoyltransferase 17	23390	ENSG00000186908	HGNC:18412	HIP14|HYPH|KIAA0946		12q21.2	protein-coding gene	Q8IUH5	0.32186	0.29988	0.29988	0	0	NA	NA|NA|NA	0	NA	NA|NA|NA	0	NA	NA|NA|NA	0	NA	NA|NA|NA	0	NA	NA|NA|NA	0	NA	NA	NA	NA	NA	NA	NA	NA	NA	NA	NA	NA	NA	NA	NA	NA	NA	NA	NA	NA
ZDHHC8	zinc finger DHHC-type palmitoyltransferase 8	29801	ENSG00000099904	HGNC:18474	ZNF378|KIAA1292		22q11.21	protein-coding gene	Q9ULC8	0.74802	0.84474	0.74802	0	0	NA	NA|NA|NA	0	NA	NA|NA|NA	0	NA	NA|NA|NA	0	NA	NA|NA|NA	0	NA	NA|NA|NA	0	NA	NA	NA	NA	NA	NA	NA	NA	NA	NA	NA	NA	NA	NA	NA	NA	NA	NA	NA	NA
ZNF536	zinc finger protein 536	9745	ENSG00000198597	HGNC:29025	KIAA0390		19q12	protein-coding gene	O15090	0.064618	0.059657	0.059657	0	0	NA	NA|NA|NA	0	NA	NA|NA|NA	0	NA	NA|NA|NA	0	NA	NA|NA|NA	0	NA	NA|NA|NA	0	NA	NA	NA	NA	NA	1	NA	NA	NA	1	1	1	1	NA	NA	NA	NA	NA	NA	NA
ZNF837	zinc finger protein 837	116412	ENSG00000152475	HGNC:25164			19q13.43	protein-coding gene	Q96EG3	0.58475	0.37581	0.37581	0	0	NA	NA|NA|NA	0	NA	NA|NA|NA	0	NA	NA|NA|NA	0	NA	NA|NA|NA	0	NA	NA|NA|NA	0	NA	NA	NA	NA	NA	NA	NA	NA	NA	NA	NA	NA	NA	NA	NA	NA	NA	NA	NA	NA
AADAC	arylacetamide deacetylase	13	ENSG00000114771	HGNC:17	DAC|CES5A1		03q25.1	protein-coding gene	P22760	0.38592	0.29314	0.29314	0	0	NA	NA|NA|NA	0	NA	NA|NA|NA	0	NA	NA|NA|NA	0	NA	NA|NA|NA	0	NA	NA|NA|NA	0	NA	NA	NA	NA	NA	NA	NA	NA	NA	NA	NA	NA	NA	NA	NA	NA	NA	NA	NA	NA
ABCA2	ATP binding cassette subfamily A member 2	20	ENSG00000107331	HGNC:32		ABC2	09q34.3	protein-coding gene	Q9BZC7	0.13342	0.053422	0.053422	0	0	NA	NA|NA|NA	0	NA	NA|NA|NA	0	NA	NA|NA|NA	0	NA	NA|NA|NA	0	NA	NA|NA|NA	0	NA	NA	NA	NA	NA	NA	NA	NA	NA	NA	NA	NA	NA	NA	NA	NA	NA	NA	NA	NA
ABCB9	ATP binding cassette subfamily B member 9	23457	ENSG00000150967	HGNC:50	EST122234		12q24.31	protein-coding gene	Q9NP78	0.35703	0.035532	0.035532	0	0	NA	NA|NA|NA	0	NA	NA|NA|NA	0	NA	NA|NA|NA	0	NA	NA|NA|NA	0	NA	NA|NA|NA	0	NA	1	NA	NA	NA	NA	NA	NA	NA	NA	NA	NA	NA	NA	NA	NA	NA	NA	NA	NA
ABCC6	ATP binding cassette subfamily C member 6	368	ENSG00000091262	HGNC:57	MRP6|EST349056|MLP1|URG7	ARA|PXE	16p13.11	protein-coding gene	O95255	0.87558	0.86427	0.86427	0	0	NA	NA|NA|NA	0	NA	NA|NA|NA	0	NA	NA|NA|NA	0	NA	NA|NA|NA	0	NA	NA|NA|NA	0	NA	NA	NA	NA	NA	NA	NA	NA	NA	NA	NA	NA	NA	NA	NA	NA	NA	NA	NA	NA
ABCF2	ATP binding cassette subfamily F member 2	10061	ENSG00000033050	HGNC:71	EST133090|ABC28|M-ABC1|HUSSY-18		07q36.1	protein-coding gene	Q9UG63	0.14647	0.07086	0.07086	0	0	NA	NA|NA|NA	0	NA	NA|NA|NA	0	NA	NA|NA|NA	0	NA	NA|NA|NA	0	NA	NA|NA|NA	0	NA	1	NA	NA	NA	NA	NA	NA	NA	NA	NA	NA	NA	NA	NA	NA	NA	NA	NA	NA
ADAM23	ADAM metallopeptidase domain 23	8745	ENSG00000114948	HGNC:202	MDC3		02q33.3	protein-coding gene	O75077	0.011639	0.015361	0.011639	0	0	NA	NA|NA|NA	0	NA	NA|NA|NA	0	NA	NA|NA|NA	0	NA	NA|NA|NA	0	NA	NA|NA|NA	0	NA	1	NA	NA	NA	NA	NA	NA	NA	NA	NA	NA	NA	NA	NA	NA	NA	NA	NA	NA
ADAT1	adenosine deaminase tRNA specific 1	23536	ENSG00000065457	HGNC:228			16q23.1	protein-coding gene	Q9BUB4	0.16953	0.28656	0.16953	0	0	NA	NA|NA|NA	0	NA	NA|NA|NA	0	NA	NA|NA|NA	1	CI	0|NA|IMR90:Mesenchymal_Stem_Cell:Mesendoderm:Trophoblast-like_Cell:hESC	0	NA	NA|NA|NA	1	1	NA	NA	NA	NA	NA	NA	NA	NA	NA	NA	NA	NA	NA	NA	NA	NA	NA	NA	NA
AFF3	AF4/FMR2 family member 3	3899	ENSG00000144218	HGNC:6473	MLLT2-like	LAF4	02q11.2	protein-coding gene	P51826	0.65232	0.63867	0.63867	0	0	NA	NA|NA|NA	0	NA	NA|NA|NA	0	NA	NA|NA|NA	0	NA	NA|NA|NA	0	NA	NA|NA|NA	0	NA	NA	NA	NA	NA	NA	NA	NA	NA	NA	NA	NA	NA	NA	NA	NA	NA	NA	NA	NA
AIFM3	apoptosis inducing factor mitochondria associated 3	150209	ENSG00000183773	HGNC:26398	AIFL|FLJ30473		22q11.21	protein-coding gene	Q96NN9	0.32196	0.96122	0.32196	0	0	NA	NA|NA|NA	0	NA	NA|NA|NA	0	NA	NA|NA|NA	0	NA	NA|NA|NA	0	NA	NA|NA|NA	0	NA	NA	NA	NA	NA	NA	NA	NA	NA	NA	NA	NA	NA	NA	NA	NA	NA	NA	NA	NA
ALDH18A1	aldehyde dehydrogenase 18 family member A1	5832	ENSG00000059573	HGNC:9722	P5CS	GSAS|PYCS|SPG9	10q24.1	protein-coding gene	P54886	0.42956	0.52588	0.42956	0	0	NA	NA|NA|NA	0	NA	NA|NA|NA	0	NA	NA|NA|NA	0	NA	NA|NA|NA	0	NA	NA|NA|NA	0	NA	NA	NA	NA	NA	NA	NA	NA	NA	NA	NA	NA	NA	NA	NA	NA	NA	NA	NA	NA
ALKBH6	alkB homolog 6	84964	ENSG00000239382	HGNC:28243	MGC15677		19q13.12	protein-coding gene	Q3KRA9	0.28841	0.0015426	0.0015426	0	0	NA	NA|NA|NA	0	NA	NA|NA|NA	0	NA	NA|NA|NA	0	NA	NA|NA|NA	0	NA	NA|NA|NA	0	NA	NA	NA	NA	NA	NA	NA	NA	NA	NA	NA	NA	NA	NA	NA	NA	NA	NA	NA	NA
ALPK3	alpha kinase 3	57538	ENSG00000136383	HGNC:17574	MAK|KIAA1330|Midori		15q25.3	protein-coding gene	Q96L96	0.02663	0.066276	0.02663	0	0	NA	NA|NA|NA	0	NA	NA|NA|NA	0	NA	NA|NA|NA	0	NA	NA|NA|NA	0	NA	NA|NA|NA	0	NA	NA	NA	NA	1	NA	NA	NA	NA	1	1	1	1	NA	NA	NA	NA	NA	NA	NA
AMH	anti-Mullerian hormone	268	ENSG00000104899	HGNC:464	MIS		19p13.3	protein-coding gene	P03971	NA	0.5517	0.5517	0	0	NA	NA|NA|NA	0	NA	NA|NA|NA	0	NA	NA|NA|NA	0	NA	NA|NA|NA	0	NA	NA|NA|NA	0	NA	NA	NA	NA	NA	NA	NA	NA	NA	NA	NA	NA	NA	NA	NA	NA	NA	NA	NA	NA
ANKRD34C	ankyrin repeat domain 34C	390616	ENSG00000235711	HGNC:33888			15q25.1	protein-coding gene	P0C6C1	0.34966	0.011337	0.011337	0	0	NA	NA|NA|NA	0	NA	NA|NA|NA	0	NA	NA|NA|NA	1	CI	0|NA|Left_Ventricle:IMR90:Mesenchymal_Stem_Cell	0	NA	NA|NA|NA	1	1	NA	NA	NA	NA	NA	NA	NA	NA	NA	NA	NA	NA	NA	NA	NA	NA	NA	NA	NA
ANKRD45	ankyrin repeat domain 45	339416	ENSG00000183831	HGNC:24786	FLJ45235|CT117		01q25.1	protein-coding gene	Q5TZF3	0.025313	0.12032	0.025313	0	0	NA	NA|NA|NA	0	NA	NA|NA|NA	0	NA	NA|NA|NA	0	NA	NA|NA|NA	0	NA	NA|NA|NA	0	NA	NA	NA	NA	1	NA	NA	NA	NA	1	1	1	1	NA	NA	NA	NA	NA	NA	NA
AQP5	aquaporin 5	362	ENSG00000161798	HGNC:638			12q13.12	protein-coding gene	P55064	0.43934	0.074754	0.074754	0	0	NA	NA|NA|NA	0	NA	NA|NA|NA	0	NA	NA|NA|NA	1	CI	0|NA|Trophoblast-like_Cell	0	NA	NA|NA|NA	1	1	NA	NA	NA	NA	NA	NA	NA	NA	NA	NA	NA	NA	NA	NA	NA	NA	NA	NA	NA
ARHGEF3	Rho guanine nucleotide exchange factor 3	50650	ENSG00000163947	HGNC:683	STA3|XPLN|GEF3|DKFZP434F2429		03p14.3	protein-coding gene	Q9NR81	0.92961	0.95394	0.92961	0	0	NA	NA|NA|NA	0	NA	NA|NA|NA	0	NA	NA|NA|NA	1	eQTL	0|eQTLGen_cis_eQTLs|NA	1	eQTL	0|eQTLGen_cis_eQTLs|NA	2	1	NA	NA	NA	NA	NA	NA	NA	NA	NA	NA	NA	NA	NA	NA	NA	NA	NA	NA	NA
ARHGEF33	Rho guanine nucleotide exchange factor 33	100271715	ENSG00000214694	HGNC:37252			02p22.1	protein-coding gene	A8MVX0	0.07506	0.015215	0.015215	0	0	NA	NA|NA|NA	0	NA	NA|NA|NA	0	NA	NA|NA|NA	0	NA	NA|NA|NA	0	NA	NA|NA|NA	0	NA	1	NA	NA	NA	NA	NA	NA	NA	NA	NA	NA	NA	NA	NA	NA	NA	NA	NA	NA
ARIH2OS	ARIH2 opposite strand lncRNA	646450	ENSG00000221883	HGNC:34425		C3orf71	03p21.31	non-coding RNA	Q8N7S6	0.9417	0.016464	0.016464	0	0	NA	NA|NA|NA	0	NA	NA|NA|NA	0	NA	NA|NA|NA	0	NA	NA|NA|NA	0	NA	NA|NA|NA	0	NA	NA	NA	NA	NA	NA	NA	NA	NA	NA	NA	NA	NA	1	NA	NA	NA	NA	NA	NA
ARL5A	ADP ribosylation factor like GTPase 5A	26225	ENSG00000162980	HGNC:696		ARL5	02q23.3	protein-coding gene	Q9Y689	0.00029003	0.00092913	0.00029003	1	0	NA	NA|NA|NA	0	NA	NA|NA|NA	0	NA	NA|NA|NA	0	NA	NA|NA|NA	0	NA	NA|NA|NA	0	NA	NA	NA	NA	NA	NA	NA	NA	NA	NA	NA	NA	NA	NA	NA	NA	NA	NA	NA	NA
ARVCF	ARVCF delta catenin family member	421	ENSG00000099889	HGNC:728			22q11.21	protein-coding gene	O00192	0.84111	0.63929	0.63929	0	0	NA	NA|NA|NA	0	NA	NA|NA|NA	0	NA	NA|NA|NA	0	NA	NA|NA|NA	0	NA	NA|NA|NA	0	NA	NA	NA	NA	NA	NA	NA	NA	NA	NA	NA	NA	NA	NA	NA	NA	NA	NA	NA	NA
ASPN	asporin	54829	ENSG00000106819	HGNC:14872	FLJ20129|SLRR1C|PLAP-1		09q22.31	protein-coding gene	Q9BXN1	0.29615	0.50315	0.29615	0	0	NA	NA|NA|NA	0	NA	NA|NA|NA	0	NA	NA|NA|NA	0	NA	NA|NA|NA	0	NA	NA|NA|NA	0	NA	NA	NA	NA	NA	NA	NA	NA	NA	NA	NA	NA	NA	NA	NA	NA	NA	NA	NA	NA
ASS1P2	argininosuccinate synthetase 1 pseudogene 2	447	ENSG00000223922	HGNC:765		ASSP2	02p22.1	pseudogene		NA	NA	NA	NA	0	NA	NA|NA|NA	0	NA	NA|NA|NA	0	NA	NA|NA|NA	0	NA	NA|NA|NA	0	NA	NA|NA|NA	0	NA	1	NA	NA	NA	NA	NA	NA	NA	NA	NA	NA	NA	NA	NA	NA	NA	NA	NA	NA
B3GNT4	UDP-GlcNAc:betaGal beta-1,3-N-acetylglucosaminyltransferase 4	79369	ENSG00000176383	HGNC:15683	B3GN-T4|beta3Gn-T4		12q24.31	protein-coding gene	Q9C0J1	0.02782	0.00082619	0.00082619	1	0	NA	NA|NA|NA	0	NA	NA|NA|NA	0	NA	NA|NA|NA	0	NA	NA|NA|NA	0	NA	NA|NA|NA	0	NA	NA	NA	NA	NA	NA	NA	NA	NA	NA	NA	NA	NA	NA	NA	NA	NA	NA	NA	NA
BAZ2B	bromodomain adjacent to zinc finger domain 2B	29994	ENSG00000123636	HGNC:963	WALp4		02q24.2	protein-coding gene	Q9UIF8	0.18679	0.015228	0.015228	0	1	Positional	6|NA|NA	0	NA	NA|NA|NA	0	NA	NA|NA|NA	1	Positional,eQTL	6|eQTLcatalogue/Lepik_2017_ge_blood:GTEx/v8/Colon_Sigmoid|Aorta:Left_Ventricle:Liver:Right_Ventricle:GM12878:IMR90:Mesenchymal_Stem_Cell:Mesendoderm:Neural_Progenitor_Cell:Trophoblast-like_Cell:hESC	0	NA	NA|NA|NA	2	1	NA	NA	NA	NA	NA	NA	NA	NA	NA	NA	NA	NA	NA	NA	NA	NA	NA	NA	NA
BCDIN3D-AS1	BCDIN3D antisense RNA 1	100286844	ENSG00000258057	HGNC:44113			12q13.12	non-coding RNA		NA	NA	NA	NA	0	NA	NA|NA|NA	0	NA	NA|NA|NA	0	NA	NA|NA|NA	0	NA	NA|NA|NA	0	NA	NA|NA|NA	0	NA	1	NA	NA	NA	NA	NA	NA	NA	NA	NA	NA	NA	NA	NA	NA	NA	NA	NA	NA
BEND4	BEN domain containing 4	389206	ENSG00000188848	HGNC:23815	FLJ35632|FLJ43965	CCDC4	04p13	protein-coding gene	Q6ZU67	0.23476	0.070839	0.070839	0	0	NA	NA|NA|NA	0	NA	NA|NA|NA	0	NA	NA|NA|NA	0	NA	NA|NA|NA	0	NA	NA|NA|NA	0	NA	NA	1	1	NA	NA	NA	NA	NA	1	1	1	1	NA	NA	NA	NA	NA	NA	NA
BNC1	basonuclin 1	646	ENSG00000169594	HGNC:1081	HsT19447	BNC	15q25.2	protein-coding gene	Q01954	0.94012	0.87349	0.87349	0	0	NA	NA|NA|NA	0	NA	NA|NA|NA	0	NA	NA|NA|NA	1	CI	0|NA|Mesenchymal_Stem_Cell	0	NA	NA|NA|NA	1	1	NA	NA	NA	NA	NA	NA	NA	NA	NA	NA	NA	NA	NA	NA	NA	NA	NA	NA	NA
BOLA3P2	bolA family member 3 pseudogene 2	100287463	ENSG00000267332	HGNC:51441			19p13.2	pseudogene		NA	NA	NA	NA	0	NA	NA|NA|NA	0	NA	NA|NA|NA	0	NA	NA|NA|NA	0	NA	NA|NA|NA	0	NA	NA|NA|NA	0	NA	NA	NA	NA	NA	NA	NA	NA	1	1	1	1	1	NA	NA	NA	NA	NA	NA	NA
BPIFB3	BPI fold containing family B member 3	359710	ENSG00000186190	HGNC:16178	dJ726C3.4|LPLUNC3|RYA3	C20orf185	20q11.21	protein-coding gene	P59826	0.53031	0.74199	0.53031	0	0	NA	NA|NA|NA	0	NA	NA|NA|NA	0	NA	NA|NA|NA	0	NA	NA|NA|NA	0	NA	NA|NA|NA	0	NA	NA	NA	NA	NA	NA	NA	NA	NA	NA	NA	NA	NA	NA	NA	NA	NA	NA	NA	NA
BST1	bone marrow stromal cell antigen 1	683	ENSG00000109743	HGNC:1118	CD157|BST-1		04p15.32	protein-coding gene	Q10588	0.1831	0.28466	0.1831	0	0	NA	NA|NA|NA	0	NA	NA|NA|NA	0	NA	NA|NA|NA	0	NA	NA|NA|NA	0	NA	NA|NA|NA	0	NA	NA	NA	NA	NA	NA	NA	NA	NA	NA	NA	NA	NA	NA	NA	NA	NA	NA	NA	NA
C12orf54	chromosome 12 open reading frame 54	121273	ENSG00000177627	HGNC:28553	MGC35033		12q13.11	protein-coding gene	Q6X4T0	0.18276	0.14886	0.14886	0	1	eQTL	0|GTEx/v8/Brain_Spinal_cord_cervical_c-1|NA	0	NA	NA|NA|NA	0	NA	NA|NA|NA	1	eQTL	0|GTEx/v8/Brain_Spinal_cord_cervical_c-1|NA	0	NA	NA|NA|NA	2	1	NA	NA	NA	NA	NA	NA	NA	NA	NA	NA	NA	NA	NA	NA	NA	NA	NA	NA	NA
C20orf204	chromosome 20 open reading frame 204	284739	ENSG00000196421	HGNC:27655	DKFZp434G015|FLJ27267	PRR17|NCRNA00176|LINC00176	20q13.33	protein-coding gene	A0A1B0GTL2	NA	NA	NA	NA	0	NA	NA|NA|NA	0	NA	NA|NA|NA	0	NA	NA|NA|NA	0	NA	NA|NA|NA	0	NA	NA|NA|NA	0	NA	1	NA	NA	NA	NA	NA	NA	NA	NA	NA	NA	NA	NA	NA	NA	NA	NA	NA	NA
C22orf39	chromosome 22 open reading frame 39	128977	ENSG00000242259	HGNC:27012	MGC74441		22q11.21	protein-coding gene	Q6P5X5	0.49553	0.82364	0.49553	0	0	NA	NA|NA|NA	0	NA	NA|NA|NA	0	NA	NA|NA|NA	0	NA	NA|NA|NA	0	NA	NA|NA|NA	0	NA	NA	NA	NA	NA	NA	NA	NA	NA	NA	NA	NA	NA	NA	NA	NA	NA	NA	NA	NA
C4orf48	chromosome 4 open reading frame 48	401115	ENSG00000243449	HGNC:34437			04p16.3	protein-coding gene	Q5BLP8	NA	0.81601	0.81601	0	0	NA	NA|NA|NA	0	NA	NA|NA|NA	0	NA	NA|NA|NA	1	CI	0|NA|IMR90	0	NA	NA|NA|NA	1	1	NA	NA	NA	NA	NA	NA	NA	NA	NA	NA	NA	NA	NA	NA	NA	NA	NA	NA	NA
CAB39	calcium binding protein 39	51719	ENSG00000135932	HGNC:20292	CGI-66|MO25		02q37.1	protein-coding gene	Q9Y376	0.0003981	0.019187	0.0003981	1	0	NA	NA|NA|NA	0	NA	NA|NA|NA	0	NA	NA|NA|NA	0	NA	NA|NA|NA	0	NA	NA|NA|NA	0	NA	NA	NA	NA	NA	NA	NA	NA	NA	NA	NA	NA	NA	NA	NA	NA	NA	NA	NA	NA
CABLES2	Cdk5 and Abl enzyme substrate 2	81928	ENSG00000149679	HGNC:16143	dJ908M14.2|ik3-2	C20orf150	20q13.33	protein-coding gene	Q9BTV7	0.072108	0.00088065	0.00088065	1	0	NA	NA|NA|NA	0	NA	NA|NA|NA	0	NA	NA|NA|NA	0	NA	NA|NA|NA	0	NA	NA|NA|NA	0	NA	NA	NA	NA	NA	NA	NA	NA	NA	NA	NA	NA	NA	NA	NA	NA	NA	NA	NA	NA
CACNA1I	calcium voltage-gated channel subunit alpha1 I	8911	ENSG00000100346	HGNC:1396	Cav3.3		22q13.1	protein-coding gene	Q9P0X4	0.032297	0.059663	0.032297	0	0	NA	NA|NA|NA	0	NA	NA|NA|NA	0	NA	NA|NA|NA	0	NA	NA|NA|NA	0	NA	NA|NA|NA	0	NA	NA	NA	NA	NA	1	NA	NA	NA	1	1	1	1	NA	NA	NA	NA	NA	NA	NA
CACNA2D3	calcium voltage-gated channel auxiliary subunit alpha2delta 3	55799	ENSG00000157445	HGNC:15460	HSA272268		03p21.1-p14.3	protein-coding gene	Q8IZS8	0.029551	0.17414	0.029551	0	0	NA	NA|NA|NA	0	NA	NA|NA|NA	0	NA	NA|NA|NA	1	CI	0|NA|Left_Ventricle:Mesenchymal_Stem_Cell	1	CI	0|NA|Left_Ventricle:Mesenchymal_Stem_Cell	2	1	NA	NA	NA	NA	NA	NA	NA	NA	NA	NA	NA	NA	NA	NA	NA	NA	NA	NA	NA
CADPS2	calcium dependent secretion activator 2	93664	ENSG00000081803	HGNC:16018	CAPS2		07q31.32	protein-coding gene	Q86UW7	0.84778	0.94424	0.84778	0	0	NA	NA|NA|NA	0	NA	NA|NA|NA	0	NA	NA|NA|NA	0	NA	NA|NA|NA	0	NA	NA|NA|NA	0	NA	NA	NA	NA	NA	NA	NA	NA	NA	NA	NA	NA	NA	NA	NA	NA	NA	NA	NA	NA
CALN1	calneuron 1	83698	ENSG00000183166	HGNC:13248	CABP8		07q11.22	protein-coding gene	Q9BXU9	0.2122	0.20911	0.20911	0	0	NA	NA|NA|NA	0	NA	NA|NA|NA	0	NA	NA|NA|NA	0	NA	NA|NA|NA	0	NA	NA|NA|NA	0	NA	NA	NA	NA	NA	NA	1	1	NA	1	1	1	1	NA	NA	NA	NA	NA	NA	NA
CAMK1D	calcium/calmodulin dependent protein kinase ID	57118	ENSG00000183049	HGNC:19341	CKLiK		10p13	protein-coding gene	Q8IU85	0.0056088	0.007031	0.0056088	0	0	NA	NA|NA|NA	0	NA	NA|NA|NA	0	NA	NA|NA|NA	0	NA	NA|NA|NA	0	NA	NA|NA|NA	0	NA	NA	NA	NA	1	NA	NA	NA	NA	1	1	1	1	NA	NA	NA	NA	NA	NA	NA
CAMKMT	calmodulin-lysine N-methyltransferase	79823	ENSG00000143919	HGNC:26276	CLNMT	C2orf34	02p21	protein-coding gene	Q7Z624	0.36371	0.24431	0.24431	0	0	NA	NA|NA|NA	0	NA	NA|NA|NA	0	NA	NA|NA|NA	1	CI	0|NA|hESC	0	NA	NA|NA|NA	1	1	NA	NA	NA	NA	NA	NA	NA	NA	NA	NA	NA	NA	NA	NA	NA	NA	NA	NA	NA
CARF	calcium responsive transcription factor	79800	ENSG00000138380	HGNC:14435	FLJ21579|NYD-SP24	ALS2CR8	02q33.2	protein-coding gene	Q8N187	0.50546	0.32195	0.32195	0	0	NA	NA|NA|NA	0	NA	NA|NA|NA	0	NA	NA|NA|NA	0	NA	NA|NA|NA	0	NA	NA|NA|NA	0	NA	NA	NA	NA	NA	NA	NA	NA	NA	NA	NA	NA	NA	NA	NA	NA	NA	NA	NA	NA
CBR3	carbonyl reductase 3	874	ENSG00000159231	HGNC:1549	SDR21C2		21q22.12	protein-coding gene	O75828	0.057392	0.24795	0.057392	0	0	NA	NA|NA|NA	0	NA	NA|NA|NA	0	NA	NA|NA|NA	0	NA	NA|NA|NA	0	NA	NA|NA|NA	0	NA	NA	NA	NA	NA	NA	NA	NA	NA	NA	NA	NA	NA	NA	NA	NA	NA	NA	NA	NA
CCDC134	coiled-coil domain containing 134	79879	ENSG00000100147	HGNC:26185	FLJ22349		22q13.2	protein-coding gene	Q9H6E4	0.32845	0.41449	0.32845	0	0	NA	NA|NA|NA	0	NA	NA|NA|NA	0	NA	NA|NA|NA	1	eQTL	0|eQTLGen_cis_eQTLs|NA	0	NA	NA|NA|NA	1	1	NA	NA	NA	NA	NA	NA	NA	NA	NA	NA	NA	NA	NA	NA	NA	NA	NA	NA	NA
CCDC71	coiled-coil domain containing 71	64925	ENSG00000177352	HGNC:25760	FLJ12800		03p21.31	protein-coding gene	Q8IV32	0.023738	0.027953	0.023738	0	0	NA	NA|NA|NA	0	NA	NA|NA|NA	0	NA	NA|NA|NA	0	NA	NA|NA|NA	0	NA	NA|NA|NA	0	NA	NA	NA	NA	NA	NA	1	1	NA	1	1	1	1	NA	NA	NA	NA	NA	NA	NA
CCDC85A	coiled-coil domain containing 85A	114800	ENSG00000055813	HGNC:29400	KIAA1912		02p16.1	protein-coding gene	Q96PX6	0.98602	0.9126	0.9126	0	0	NA	NA|NA|NA	0	NA	NA|NA|NA	0	NA	NA|NA|NA	1	CI	0|NA|IMR90	0	NA	NA|NA|NA	1	1	NA	NA	NA	NA	NA	NA	NA	NA	NA	NA	NA	NA	NA	NA	NA	NA	NA	NA	NA
CDC45	cell division cycle 45	8318	ENSG00000093009	HGNC:1739		CDC45L2|CDC45L	22q11.21	protein-coding gene	O75419	0.93	0.95105	0.93	0	0	NA	NA|NA|NA	0	NA	NA|NA|NA	0	NA	NA|NA|NA	0	NA	NA|NA|NA	0	NA	NA|NA|NA	0	NA	NA	NA	NA	NA	NA	NA	NA	NA	NA	NA	NA	NA	NA	NA	NA	NA	NA	NA	NA
CDH7	cadherin 7	1005	ENSG00000081138	HGNC:1766			18q22.1	protein-coding gene	Q9ULB5	0.04833	0.016627	0.016627	0	0	NA	NA|NA|NA	0	NA	NA|NA|NA	0	NA	NA|NA|NA	0	NA	NA|NA|NA	0	NA	NA|NA|NA	0	NA	1	NA	NA	NA	NA	NA	NA	NA	NA	NA	NA	NA	NA	NA	NA	NA	NA	NA	NA
CENPT	centromere protein T	80152	ENSG00000102901	HGNC:25787	FLJ13111|CENP-T	C16orf56	16q22.1	protein-coding gene	Q96BT3	0.008731	0.0049956	0.0049956	0	0	NA	NA|NA|NA	0	NA	NA|NA|NA	0	NA	NA|NA|NA	0	NA	NA|NA|NA	0	NA	NA|NA|NA	0	NA	NA	NA	NA	1	NA	NA	NA	NA	1	1	1	1	NA	NA	NA	NA	NA	NA	NA
CEP295NL	CEP295 N-terminal like	100653515	ENSG00000178404	HGNC:44659	DDC8	KIAA1731NL	17q25.3	protein-coding gene	Q96MC4	0.0043214	0.015247	0.0043214	0	0	NA	NA|NA|NA	0	NA	NA|NA|NA	0	NA	NA|NA|NA	0	NA	NA|NA|NA	0	NA	NA|NA|NA	0	NA	1	NA	NA	NA	NA	NA	NA	NA	NA	NA	NA	NA	NA	NA	NA	NA	NA	NA	NA
CFAP251	cilia and flagella associated protein 251	144406	ENSG00000158023	HGNC:28506	MGC33630|CaM-IP4	WDR66	12q24.31	protein-coding gene	Q8TBY9	0.026126	0.0010148	0.0010148	0	0	NA	NA|NA|NA	0	NA	NA|NA|NA	0	NA	NA|NA|NA	0	NA	NA|NA|NA	0	NA	NA|NA|NA	0	NA	1	NA	NA	NA	NA	NA	NA	NA	NA	NA	NA	NA	NA	NA	NA	NA	NA	NA	NA
CHMP1A	charged multivesicular body protein 1A	5119	ENSG00000131165	HGNC:8740	KIAA0047|CHMP1|Vps46A	PRSM1|PCOLN3	16q24.3	protein-coding gene	Q9HD42	0.016768	0.0060112	0.0060112	0	0	NA	NA|NA|NA	0	NA	NA|NA|NA	0	NA	NA|NA|NA	0	NA	NA|NA|NA	0	NA	NA|NA|NA	0	NA	1	NA	NA	NA	NA	NA	NA	NA	NA	NA	NA	NA	NA	NA	NA	NA	NA	NA	NA
CHST5	carbohydrate sulfotransferase 5	23563	ENSG00000135702	HGNC:1973	I-GLCNAC-6-ST|FLJ22167		16q23.1	protein-coding gene	Q9GZS9	0.26712	0.40718	0.26712	0	0	NA	NA|NA|NA	0	NA	NA|NA|NA	0	NA	NA|NA|NA	1	CI	0|NA|Mesenchymal_Stem_Cell	0	NA	NA|NA|NA	1	1	NA	NA	NA	NA	NA	NA	NA	NA	NA	NA	NA	NA	NA	NA	NA	NA	NA	NA	NA
CHST6	carbohydrate sulfotransferase 6	4166	ENSG00000183196	HGNC:6938		MCDC1	16q23.1	protein-coding gene	Q9GZX3	0.78074	0.59595	0.59595	0	0	NA	NA|NA|NA	0	NA	NA|NA|NA	0	NA	NA|NA|NA	1	CI	0|NA|Mesenchymal_Stem_Cell	0	NA	NA|NA|NA	1	1	NA	NA	NA	NA	NA	NA	NA	NA	NA	NA	NA	NA	NA	NA	NA	NA	NA	NA	NA
CLCA4	chloride channel accessory 4	22802	ENSG00000016602	HGNC:2018	CaCC2		01p22.3	protein-coding gene	Q14CN2	0.86659	0.87814	0.86659	0	0	NA	NA|NA|NA	0	NA	NA|NA|NA	0	NA	NA|NA|NA	1	CI	0|NA|Mesendoderm	1	CI	0|NA|Mesendoderm	2	1	NA	NA	NA	NA	NA	NA	NA	NA	NA	NA	NA	NA	NA	NA	NA	NA	NA	NA	NA
CLDN5	claudin 5	7122	ENSG00000184113	HGNC:2047	CPETRL1|BEC1	AWAL|TMVCF	22q11.21	protein-coding gene	O00501	0.83611	0.9542	0.83611	0	0	NA	NA|NA|NA	0	NA	NA|NA|NA	0	NA	NA|NA|NA	0	NA	NA|NA|NA	0	NA	NA|NA|NA	0	NA	NA	NA	NA	NA	NA	NA	NA	NA	NA	NA	NA	NA	NA	NA	NA	NA	NA	NA	NA
CMTM5	CKLF like MARVEL transmembrane domain containing 5	116173	ENSG00000166091	HGNC:19176	FLJ37521	CKLFSF5	14q11.2	protein-coding gene	Q96DZ9	0.17086	0.062992	0.062992	0	0	NA	NA|NA|NA	0	NA	NA|NA|NA	0	NA	NA|NA|NA	0	NA	NA|NA|NA	0	NA	NA|NA|NA	0	NA	NA	NA	NA	NA	NA	NA	NA	NA	NA	NA	NA	NA	NA	NA	NA	NA	NA	NA	NA
CNTNAP4	contactin associated protein family member 4	85445	ENSG00000152910	HGNC:18747	CASPR4|KIAA1763		16q23.1	protein-coding gene	Q9C0A0	0.0073979	0.0058	0.0058	0	0	NA	NA|NA|NA	0	NA	NA|NA|NA	0	NA	NA|NA|NA	1	CI	0|NA|Left_Ventricle:IMR90:Mesenchymal_Stem_Cell:Mesendoderm:hESC	0	NA	NA|NA|NA	1	1	NA	NA	NA	NA	NA	NA	NA	NA	NA	NA	NA	NA	NA	NA	NA	NA	NA	NA	NA
CNTNAP5	contactin associated protein family member 5	129684	ENSG00000155052	HGNC:18748	caspr5|FLJ31966		02q14.3	protein-coding gene	Q8WYK1	0.4608	0.35592	0.35592	0	0	NA	NA|NA|NA	0	NA	NA|NA|NA	0	NA	NA|NA|NA	0	NA	NA|NA|NA	0	NA	NA|NA|NA	0	NA	NA	NA	NA	NA	NA	NA	NA	NA	NA	NA	NA	NA	NA	NA	NA	NA	NA	NA	NA
COA8	cytochrome c oxidase assembly factor 8	84334	ENSG00000256053	HGNC:20492	MGC2562|APOP-1	C14orf153|APOPT1	14q32.33	protein-coding gene	Q96IL0	0.10886	0.027968	0.027968	0	0	NA	NA|NA|NA	0	NA	NA|NA|NA	0	NA	NA|NA|NA	0	NA	NA|NA|NA	0	NA	NA|NA|NA	0	NA	NA	1	1	NA	NA	NA	NA	NA	1	1	1	1	NA	NA	NA	NA	NA	NA	NA
COL6A6	collagen type VI alpha 6 chain	131873	ENSG00000206384	HGNC:27023			03q22.1	protein-coding gene	A6NMZ7	0.78629	0.24021	0.24021	0	0	NA	NA|NA|NA	0	NA	NA|NA|NA	0	NA	NA|NA|NA	0	NA	NA|NA|NA	0	NA	NA|NA|NA	0	NA	NA	NA	NA	NA	NA	NA	NA	NA	NA	NA	NA	NA	NA	NA	NA	NA	NA	NA	NA
COL9A2	collagen type IX alpha 2 chain	1298	ENSG00000049089	HGNC:2218	MED	EDM2	01p34.2	protein-coding gene	Q14055	0.4035	0.21712	0.21712	0	0	NA	NA|NA|NA	0	NA	NA|NA|NA	0	NA	NA|NA|NA	0	NA	NA|NA|NA	0	NA	NA|NA|NA	0	NA	NA	NA	NA	NA	NA	NA	NA	NA	NA	NA	NA	NA	NA	NA	NA	NA	NA	NA	NA
CORO7-PAM16	CORO7-PAM16 readthrough	100529144	ENSG00000103426	HGNC:44424			16p13.3	other		0.31851	0.77459	0.31851	0	0	NA	NA|NA|NA	0	NA	NA|NA|NA	0	NA	NA|NA|NA	0	NA	NA|NA|NA	0	NA	NA|NA|NA	0	NA	NA	NA	NA	NA	NA	NA	NA	NA	NA	NA	NA	NA	NA	NA	NA	NA	NA	NA	NA
CPEB1	cytoplasmic polyadenylation element binding protein 1	64506	ENSG00000214575	HGNC:21744	FLJ13203|CPEB		15q25.2	protein-coding gene	Q9BZB8	0.04712	0.047792	0.04712	0	1	Positional	2|NA|NA	0	NA	NA|NA|NA	0	NA	NA|NA|NA	1	Positional	2|NA|NA	0	NA	NA|NA|NA	2	1	NA	NA	NA	NA	NA	NA	NA	NA	NA	NA	NA	NA	NA	NA	NA	NA	NA	NA	NA
CPT1C	carnitine palmitoyltransferase 1C	126129	ENSG00000169169	HGNC:18540	FLJ23809|CPTIC|CPT1P|CATL1		19q13.33	protein-coding gene	Q8TCG5	0.00079218	0.11669	0.00079218	1	0	NA	NA|NA|NA	0	NA	NA|NA|NA	0	NA	NA|NA|NA	0	NA	NA|NA|NA	0	NA	NA|NA|NA	0	NA	NA	NA	NA	NA	NA	NA	NA	NA	NA	NA	NA	NA	NA	NA	NA	NA	NA	NA	NA
CRLS1	cardiolipin synthase 1	54675	ENSG00000088766	HGNC:16148	dJ967N21.6|CLS1|GCD10	C20orf155	20p12.3	protein-coding gene	Q9UJA2	0.038876	0.0033849	0.0033849	0	0	NA	NA|NA|NA	0	NA	NA|NA|NA	0	NA	NA|NA|NA	0	NA	NA|NA|NA	0	NA	NA|NA|NA	0	NA	1	NA	NA	NA	NA	NA	NA	NA	NA	NA	NA	NA	NA	NA	NA	NA	NA	NA	NA
CSMD1	CUB and Sushi multiple domains 1	64478	ENSG00000183117	HGNC:14026	KIAA1890|PPP1R24		08p23.2	protein-coding gene	Q96PZ7	0.11219	0.12248	0.11219	0	0	NA	NA|NA|NA	0	NA	NA|NA|NA	0	NA	NA|NA|NA	0	NA	NA|NA|NA	0	NA	NA|NA|NA	0	NA	NA	1	1	NA	NA	NA	NA	NA	1	1	1	1	NA	NA	NA	NA	NA	NA	NA
CSMD3	CUB and Sushi multiple domains 3	114788	ENSG00000164796	HGNC:19291			08q23.3	protein-coding gene	Q7Z407	0.049676	0.023425	0.023425	0	0	NA	NA|NA|NA	0	NA	NA|NA|NA	0	NA	NA|NA|NA	0	NA	NA|NA|NA	0	NA	NA|NA|NA	0	NA	NA	NA	NA	NA	NA	NA	NA	1	1	1	1	1	NA	NA	NA	NA	NA	NA	NA
CTRL	chymotrypsin like	1506	ENSG00000141086	HGNC:2524			16q22.1	protein-coding gene	P40313	0.006653	0.010211	0.006653	0	0	NA	NA|NA|NA	0	NA	NA|NA|NA	0	NA	NA|NA|NA	0	NA	NA|NA|NA	0	NA	NA|NA|NA	0	NA	NA	NA	NA	1	NA	NA	NA	NA	1	1	1	1	NA	NA	NA	NA	NA	NA	NA
CXCL14	C-X-C motif chemokine ligand 14	9547	ENSG00000145824	HGNC:10640	BRAK|NJAC|bolekine|Kec|MIP-2g|BMAC|KS1	SCYB14	05q31.1	protein-coding gene	O95715	0.44396	0.04721	0.04721	0	0	NA	NA|NA|NA	0	NA	NA|NA|NA	0	NA	NA|NA|NA	0	NA	NA|NA|NA	0	NA	NA|NA|NA	0	NA	1	NA	NA	NA	NA	NA	NA	NA	NA	NA	NA	NA	NA	NA	NA	NA	NA	NA	NA
DAP	death associated protein	1611	ENSG00000112977	HGNC:2672			05p15.2	protein-coding gene	P51397	0.46323	0.92958	0.46323	0	0	NA	NA|NA|NA	0	NA	NA|NA|NA	0	NA	NA|NA|NA	0	NA	NA|NA|NA	0	NA	NA|NA|NA	0	NA	NA	NA	NA	NA	NA	NA	NA	NA	NA	NA	NA	NA	NA	NA	NA	NA	NA	NA	NA
DCAF4L1	DDB1 and CUL4 associated factor 4 like 1	285429	ENSG00000182308	HGNC:27723		WDR21B	04p13	protein-coding gene	Q3SXM0	0.56669	0.51818	0.51818	0	0	NA	NA|NA|NA	0	NA	NA|NA|NA	0	NA	NA|NA|NA	0	NA	NA|NA|NA	0	NA	NA|NA|NA	0	NA	NA	1	1	NA	NA	NA	NA	NA	1	1	1	1	NA	NA	NA	NA	NA	NA	NA
DCC	DCC netrin 1 receptor	1630	ENSG00000187323	HGNC:2701	IGDCC1|NTN1R1		18q21.2	protein-coding gene	P43146	0.037624	0.041105	0.037624	0	0	NA	NA|NA|NA	0	NA	NA|NA|NA	0	NA	NA|NA|NA	0	NA	NA|NA|NA	0	NA	NA|NA|NA	0	NA	NA	1	1	NA	NA	NA	NA	NA	1	1	1	1	NA	NA	NA	NA	NA	NA	NA
DDN	dendrin	23109	ENSG00000181418	HGNC:24458	KIAA0749		12q13.12	protein-coding gene	O94850	0.34058	0.1056	0.1056	0	0	NA	NA|NA|NA	0	NA	NA|NA|NA	0	NA	NA|NA|NA	1	CI	0|NA|IMR90	0	NA	NA|NA|NA	1	1	NA	NA	NA	NA	NA	NA	NA	NA	NA	NA	NA	NA	NA	NA	NA	NA	NA	NA	NA
DGCR11	DiGeorge syndrome critical region gene 11	25786	ENSG00000273311	HGNC:17226	DGS-D		22q11.21	non-coding RNA		NA	NA	NA	NA	0	NA	NA|NA|NA	0	NA	NA|NA|NA	0	NA	NA|NA|NA	0	NA	NA|NA|NA	0	NA	NA|NA|NA	0	NA	NA	NA	NA	NA	NA	NA	NA	NA	NA	NA	NA	NA	NA	NA	NA	NA	NA	NA	NA
DGCR2	DiGeorge syndrome critical region gene 2	9993	ENSG00000070413	HGNC:2845	KIAA0163|LAN|IDD|DGS-C|SEZ-12		22q11.21	protein-coding gene	P98153	0.54923	0.84923	0.54923	0	0	NA	NA|NA|NA	0	NA	NA|NA|NA	0	NA	NA|NA|NA	0	NA	NA|NA|NA	0	NA	NA|NA|NA	0	NA	NA	NA	NA	NA	NA	NA	NA	NA	NA	NA	NA	NA	NA	NA	NA	NA	NA	NA	NA
DGCR5	DiGeorge syndrome critical region gene 5	26220	ENSG00000273032	HGNC:16757	NCRNA00037|LINC00037|X91348|DGS-A|POM121L5P|DGS-B	DGCR9|DGCR10	22q11.21	non-coding RNA		NA	NA	NA	NA	0	NA	NA|NA|NA	0	NA	NA|NA|NA	0	NA	NA|NA|NA	0	NA	NA|NA|NA	0	NA	NA|NA|NA	0	NA	NA	NA	NA	NA	NA	NA	NA	NA	NA	NA	NA	NA	NA	NA	NA	NA	NA	NA	NA
DGCR6L	DiGeorge syndrome critical region gene 6 like	85359	ENSG00000128185	HGNC:18551	FLJ10666		22q11.21	protein-coding gene	Q9BY27	0.13723	0.53073	0.13723	0	0	NA	NA|NA|NA	0	NA	NA|NA|NA	0	NA	NA|NA|NA	0	NA	NA|NA|NA	0	NA	NA|NA|NA	0	NA	NA	NA	NA	NA	NA	NA	NA	NA	NA	NA	NA	NA	NA	NA	NA	NA	NA	NA	NA
DLEC1	DLEC1 cilia and flagella associated protein	9940	ENSG00000008226	HGNC:2899	DLC1|CFAP81|FAP81		03p22.2	protein-coding gene	Q9Y238	0.8875	0.088432	0.088432	0	0	NA	NA|NA|NA	0	NA	NA|NA|NA	0	NA	NA|NA|NA	0	NA	NA|NA|NA	0	NA	NA|NA|NA	0	NA	NA	NA	NA	NA	NA	NA	NA	NA	NA	NA	NA	NA	NA	NA	NA	NA	0	1	NA
DLX6	distal-less homeobox 6	1750	ENSG00000006377	HGNC:2919			07q21.3	protein-coding gene	P56179	0.97704	0.7116	0.7116	0	0	NA	NA|NA|NA	0	NA	NA|NA|NA	0	NA	NA|NA|NA	0	NA	NA|NA|NA	0	NA	NA|NA|NA	0	NA	NA	NA	NA	NA	NA	NA	NA	NA	NA	NA	NA	NA	NA	NA	NA	NA	NA	NA	NA
DNAJB7	DnaJ heat shock protein family (Hsp40) member B7	150353	ENSG00000172404	HGNC:24986	HSC3		22q13.2	protein-coding gene	Q7Z6W7	0.1698	0.02233	0.02233	0	1	eQTL	0|eQTLcatalogue/BrainSeq_ge_brain|NA	1	eQTL	0|eQTLcatalogue/BrainSeq_ge_brain|NA	1	eQTL	0|eQTLcatalogue/BrainSeq_ge_brain|NA	1	eQTL	0|eQTLcatalogue/BrainSeq_ge_brain:BIOSQTL/BIOS_eQTL_geneLevel:GTEx/v8/Thyroid|NA	1	eQTL	0|eQTLcatalogue/BrainSeq_ge_brain:BIOSQTL/BIOS_eQTL_geneLevel:GTEx/v8/Thyroid|NA	4	1	NA	NA	NA	NA	NA	NA	NA	NA	NA	NA	NA	NA	NA	NA	NA	NA	NA	NA	NA
DNAJC8	DnaJ heat shock protein family (Hsp40) member C8	22826	ENSG00000126698	HGNC:15470	SPF31		01p35.3	protein-coding gene	O75937	0.41078	0.56344	0.41078	0	0	NA	NA|NA|NA	0	NA	NA|NA|NA	0	NA	NA|NA|NA	1	eQTL	0|GTEx/v8/Lung|NA	0	NA	NA|NA|NA	1	1	NA	NA	NA	NA	NA	NA	NA	NA	NA	NA	NA	NA	NA	NA	NA	NA	NA	NA	NA
DPCD	deleted in primary ciliary dyskinesia homolog (mouse)	25911	ENSG00000166171	HGNC:24542	DKFZP566F084|RP11-529I10.4		10q24.32	protein-coding gene	Q9BVM2	0.047008	0.060952	0.047008	0	0	NA	NA|NA|NA	0	NA	NA|NA|NA	0	NA	NA|NA|NA	0	NA	NA|NA|NA	0	NA	NA|NA|NA	0	NA	1	NA	NA	NA	NA	NA	NA	NA	NA	NA	NA	NA	NA	NA	NA	NA	NA	NA	NA
DPP6	dipeptidyl peptidase like 6	1804	ENSG00000130226	HGNC:3010	DPPX|DPL1		07q36.2	protein-coding gene	P42658	NA	NA	NA	NA	0	NA	NA|NA|NA	0	NA	NA|NA|NA	0	NA	NA|NA|NA	0	NA	NA|NA|NA	0	NA	NA|NA|NA	0	NA	NA	NA	NA	NA	NA	NA	NA	NA	NA	NA	NA	NA	NA	NA	NA	NA	NA	NA	NA
DPP7	dipeptidyl peptidase 7	29952	ENSG00000176978	HGNC:14892	DPPII|DPP2		09q34.3	protein-coding gene	Q9UHL4	0.22255	0.0053987	0.0053987	0	0	NA	NA|NA|NA	0	NA	NA|NA|NA	0	NA	NA|NA|NA	0	NA	NA|NA|NA	0	NA	NA|NA|NA	0	NA	1	NA	NA	NA	NA	NA	NA	NA	NA	NA	NA	NA	NA	NA	NA	NA	NA	NA	NA
DSTYK	dual serine/threonine and tyrosine protein kinase	25778	ENSG00000133059	HGNC:29043	KIAA0472|DustyPK|RIP5	RIPK5|SPG23	01q32.1	protein-coding gene	Q6XUX3	0.0068109	0.016476	0.0068109	0	0	NA	NA|NA|NA	0	NA	NA|NA|NA	0	NA	NA|NA|NA	0	NA	NA|NA|NA	0	NA	NA|NA|NA	0	NA	NA	NA	NA	1	NA	NA	NA	NA	1	1	1	1	NA	NA	NA	NA	NA	NA	NA
DTX2P1	DTX2 pseudogene 1	107161144	ENSG00000186704	HGNC:42352			07q11.23	pseudogene		NA	NA	NA	NA	0	NA	NA|NA|NA	0	NA	NA|NA|NA	0	NA	NA|NA|NA	0	NA	NA|NA|NA	0	NA	NA|NA|NA	0	NA	1	NA	NA	NA	NA	NA	NA	NA	NA	NA	NA	NA	NA	NA	NA	NA	NA	NA	NA
EIF4EBP2P3	eukaryotic translation initiation factor 4E binding protein 2 pseudogene 3	100190924	ENSG00000220505	HGNC:49318			06q16.1	pseudogene		NA	NA	NA	NA	0	NA	NA|NA|NA	0	NA	NA|NA|NA	0	NA	NA|NA|NA	0	NA	NA|NA|NA	0	NA	NA|NA|NA	0	NA	NA	NA	NA	NA	NA	NA	NA	1	1	1	1	1	NA	NA	NA	NA	NA	NA	NA
EPSTI1	epithelial stromal interaction 1	94240	ENSG00000133106	HGNC:16465	BRESI1|MGC29634		13q14.11	protein-coding gene	Q96J88	0.83383	0.55223	0.55223	0	0	NA	NA|NA|NA	0	NA	NA|NA|NA	0	NA	NA|NA|NA	0	NA	NA|NA|NA	0	NA	NA|NA|NA	0	NA	NA	NA	NA	NA	NA	NA	NA	NA	NA	NA	NA	NA	NA	NA	NA	NA	NA	NA	NA
ERC2	ELKS/RAB6-interacting/CAST family member 2	26059	ENSG00000187672	HGNC:31922	CAST|CAST1|KIAA0378|SPBC110|Spc110|ELKSL		03p14.3	protein-coding gene	O15083	0.0012774	0.0025125	0.0012774	0	1	Positional,eQTL	96|PsychENCODE_eQTLs:CMC_SVA_cis|NA	1	Positional,eQTL	9|PsychENCODE_eQTLs:CMC_SVA_cis|NA	1	Positional,eQTL	1|PsychENCODE_eQTLs:CMC_SVA_cis|NA	1	Positional,eQTL	96|PsychENCODE_eQTLs:CMC_SVA_cis|NA	1	Positional,eQTL	9|PsychENCODE_eQTLs:CMC_SVA_cis|NA	4	1	NA	NA	NA	NA	NA	NA	NA	NA	NA	NA	NA	NA	NA	NA	NA	NA	NA	NA	NA
ETV7	ETS variant transcription factor 7	51513	ENSG00000010030	HGNC:18160	TEL2|TEL-2		06p21.31	protein-coding gene	Q9Y603	0.66586	0.38662	0.38662	0	1	eQTL	0|PsychENCODE_eQTLs|NA	1	eQTL	0|PsychENCODE_eQTLs|NA	1	eQTL	0|PsychENCODE_eQTLs|NA	1	eQTL,CI	0|eQTLcatalogue/Lepik_2017_ge_blood:PsychENCODE_eQTLs:eQTLGen_cis_eQTLs:GTEx/v8/Whole_Blood|IMR90	1	eQTL	0|PsychENCODE_eQTLs:eQTLGen_cis_eQTLs:GTEx/v8/Whole_Blood|NA	4	1	NA	NA	NA	NA	NA	NA	NA	NA	NA	NA	NA	NA	NA	NA	NA	NA	NA	NA	NA
EXOC3L4	exocyst complex component 3 like 4	91828	ENSG00000205436	HGNC:20120		C14orf73	14q32.32	protein-coding gene	Q17RC7	0.63884	0.9884	0.63884	0	0	NA	NA|NA|NA	0	NA	NA|NA|NA	0	NA	NA|NA|NA	0	NA	NA|NA|NA	0	NA	NA|NA|NA	0	NA	NA	1	1	NA	NA	NA	NA	NA	1	1	1	1	NA	NA	NA	NA	NA	NA	NA
FAM153B	family with sequence similarity 153 member B	202134	ENSG00000182230	HGNC:27323			05q35.2	protein-coding gene	P0C7A2	NA	0.0018528	0.0018528	0	0	NA	NA|NA|NA	0	NA	NA|NA|NA	0	NA	NA|NA|NA	0	NA	NA|NA|NA	0	NA	NA|NA|NA	0	NA	1	NA	NA	NA	NA	NA	NA	NA	NA	NA	NA	NA	NA	NA	NA	NA	NA	NA	NA
FAXC	failed axon connections homolog, metaxin like GST domain containing	84553	ENSG00000146267	HGNC:20742	MGC2817|dJ273F20	C6orf168	06q16.2	protein-coding gene	Q5TGI0	0.81221	0.86114	0.81221	0	0	NA	NA|NA|NA	0	NA	NA|NA|NA	0	NA	NA|NA|NA	1	CI	0|NA|Mesendoderm	0	NA	NA|NA|NA	1	1	NA	NA	NA	NA	NA	NA	NA	NA	NA	NA	NA	NA	NA	NA	NA	NA	NA	NA	NA
FBXO10	F-box protein 10	26267	ENSG00000147912	HGNC:13589	FBX10		09p13.2	protein-coding gene	Q9UK96	0.13212	0.33587	0.13212	0	0	NA	NA|NA|NA	0	NA	NA|NA|NA	0	NA	NA|NA|NA	0	NA	NA|NA|NA	0	NA	NA|NA|NA	0	NA	NA	NA	NA	NA	NA	NA	NA	NA	NA	NA	NA	NA	NA	NA	NA	NA	NA	NA	NA
FGF17	fibroblast growth factor 17	8822	ENSG00000158815	HGNC:3673	FGF-13		08p21.3	protein-coding gene	O60258	0.13514	0.13748	0.13514	0	0	NA	NA|NA|NA	0	NA	NA|NA|NA	0	NA	NA|NA|NA	0	NA	NA|NA|NA	0	NA	NA|NA|NA	0	NA	NA	NA	NA	NA	NA	NA	NA	NA	NA	NA	NA	NA	NA	NA	NA	NA	NA	NA	NA
FLG	filaggrin	2312	ENSG00000143631	HGNC:3748			01q21.3	protein-coding gene	P20930	0.088847	0.057261	0.057261	0	0	NA	NA|NA|NA	0	NA	NA|NA|NA	0	NA	NA|NA|NA	0	NA	NA|NA|NA	0	NA	NA|NA|NA	0	NA	NA	NA	NA	NA	NA	NA	NA	NA	NA	NA	NA	NA	NA	NA	NA	NA	NA	NA	NA
FMNL3	formin like 3	91010	ENSG00000161791	HGNC:23698	DKFZp762B245|MGC45819|WBP3		12q13.12	protein-coding gene	Q8IVF7	0.019051	0.0040974	0.0040974	0	1	eQTL,CI	0|PsychENCODE_eQTLs|Adult_Cortex:Fetal_Cortex	0	NA	NA|NA|NA	0	NA	NA|NA|NA	1	eQTL,CI	0|eQTLcatalogue/BLUEPRINT_ge_neutrophil:PsychENCODE_eQTLs:eQTLGen_cis_eQTLs|Adult_Cortex:Fetal_Cortex:GM12878:IMR90:Mesenchymal_Stem_Cell	1	eQTL,CI	0|eQTLGen_cis_eQTLs|GM12878:IMR90:Mesenchymal_Stem_Cell	3	1	NA	NA	NA	NA	NA	NA	NA	NA	NA	NA	NA	NA	NA	NA	NA	NA	NA	NA	NA
FMO2	flavin containing dimethylaniline monoxygenase 2	2327	ENSG00000094963	HGNC:3770			01q24.3	protein-coding gene	Q99518	0.68974	0.69048	0.68974	0	0	NA	NA|NA|NA	0	NA	NA|NA|NA	0	NA	NA|NA|NA	0	NA	NA|NA|NA	0	NA	NA|NA|NA	0	NA	NA	NA	NA	NA	NA	NA	NA	NA	NA	NA	NA	NA	NA	NA	NA	NA	NA	NA	NA
FSCB	fibrous sheath CABYR binding protein	84075	ENSG00000189139	HGNC:20494	DKFZP434F1017	C14orf155	14q21.2	protein-coding gene	Q5H9T9	0.44772	0.77728	0.44772	0	0	NA	NA|NA|NA	0	NA	NA|NA|NA	0	NA	NA|NA|NA	0	NA	NA|NA|NA	0	NA	NA|NA|NA	0	NA	NA	NA	NA	NA	NA	NA	NA	NA	NA	NA	NA	NA	NA	NA	NA	NA	NA	NA	NA
FSIP1	fibrous sheath interacting protein 1	161835	ENSG00000150667	HGNC:21674	FLJ35989		15q14	protein-coding gene	Q8NA03	0.90708	0.92358	0.90708	0	0	NA	NA|NA|NA	0	NA	NA|NA|NA	0	NA	NA|NA|NA	0	NA	NA|NA|NA	0	NA	NA|NA|NA	0	NA	NA	1	1	NA	NA	NA	NA	NA	1	1	1	1	NA	NA	NA	NA	NA	NA	NA
GAL3ST2	galactose-3-O-sulfotransferase 2	64090	ENSG00000154252	HGNC:24869	GP3ST		02q37.3	protein-coding gene	Q9H3Q3	0.035448	0.52832	0.035448	0	0	NA	NA|NA|NA	0	NA	NA|NA|NA	0	NA	NA|NA|NA	0	NA	NA|NA|NA	0	NA	NA|NA|NA	0	NA	1	NA	NA	NA	NA	NA	NA	NA	NA	NA	NA	NA	NA	NA	NA	NA	NA	NA	NA
GFUS	GDP-L-fucose synthase	7264	ENSG00000104522	HGNC:12390	FX|P35B|SDR4E1	TSTA3	08q24.3	protein-coding gene	Q13630	0.75811	0.3525	0.3525	0	0	NA	NA|NA|NA	0	NA	NA|NA|NA	0	NA	NA|NA|NA	0	NA	NA|NA|NA	0	NA	NA|NA|NA	0	NA	NA	NA	NA	NA	NA	NA	NA	NA	NA	NA	NA	NA	NA	NA	NA	NA	NA	NA	NA
GNB1L	G protein subunit beta 1 like	54584	ENSG00000185838	HGNC:4397	GY2|WDR14		22q11.21	protein-coding gene	Q9BYB4	0.60741	0.23126	0.23126	0	0	NA	NA|NA|NA	0	NA	NA|NA|NA	0	NA	NA|NA|NA	0	NA	NA|NA|NA	0	NA	NA|NA|NA	0	NA	NA	NA	NA	NA	NA	NA	NA	NA	NA	NA	NA	NA	NA	NA	NA	NA	NA	NA	NA
GNPDA2	glucosamine-6-phosphate deaminase 2	132789	ENSG00000163281	HGNC:21526	SB52		04p12	protein-coding gene	Q8TDQ7	0.42276	0.69568	0.42276	0	0	NA	NA|NA|NA	0	NA	NA|NA|NA	0	NA	NA|NA|NA	1	CI	0|NA|Left_Ventricle:Mesendoderm	0	NA	NA|NA|NA	1	1	NA	NA	NA	NA	NA	NA	NA	NA	NA	NA	NA	NA	NA	NA	NA	NA	NA	NA	NA
GOLGA6L9	golgin A6 family like 9	440295	ENSG00000197978	HGNC:37229		GOLGA6L20	15q25.2	protein-coding gene	A6NEM1	NA	0.05501	0.05501	0	1	Positional	1|NA|NA	0	NA	NA|NA|NA	0	NA	NA|NA|NA	1	Positional,eQTL	1|BIOSQTL/BIOS_eQTL_geneLevel:GTEx/v8/Adipose_Visceral_Omentum:GTEx/v8/Whole_Blood:GTEx/v8/Artery_Aorta:GTEx/v8/Artery_Tibial:GTEx/v8/Breast_Mammary_Tissue:GTEx/v8/Colon_Sigmoid:GTEx/v8/Colon_Transverse:GTEx/v8/Esophagus_Gastroesophageal_Junction:GTEx/v8/Esophagus_Mucosa:GTEx/v8/Esophagus_Muscularis:GTEx/v8/Heart_Atrial_Appendage:GTEx/v8/Nerve_Tibial:GTEx/v8/Pituitary:GTEx/v8/Prostate:GTEx/v8/Cel…	1	eQTL	0|GTEx/v8/Artery_Tibial:GTEx/v8/Breast_Mammary_Tissue:GTEx/v8/Colon_Transverse:GTEx/v8/Esophagus_Mucosa:GTEx/v8/Heart_Atrial_Appendage:GTEx/v8/Skin_Not_Sun_Exposed_Suprapubic:GTEx/v8/Skin_Sun_Exposed_Lower_leg|NA	3	1	NA	NA	NA	NA	NA	NA	NA	NA	NA	NA	NA	NA	NA	NA	NA	NA	NA	NA	NA
GP1BB	glycoprotein Ib platelet subunit beta	2812	ENSG00000203618	HGNC:4440	CD42c|GPIbbeta		22q11.21	protein-coding gene	P13224	NA	0.19459	0.19459	0	0	NA	NA|NA|NA	0	NA	NA|NA|NA	0	NA	NA|NA|NA	0	NA	NA|NA|NA	0	NA	NA|NA|NA	0	NA	NA	NA	NA	NA	NA	NA	NA	NA	NA	NA	NA	NA	NA	NA	NA	NA	NA	NA	NA
GPR149	G protein-coupled receptor 149	344758	ENSG00000174948	HGNC:23627	PGR10|IEDA|R35		03q25.2	protein-coding gene	Q86SP6	0.37513	0.61649	0.37513	0	0	NA	NA|NA|NA	0	NA	NA|NA|NA	0	NA	NA|NA|NA	0	NA	NA|NA|NA	0	NA	NA|NA|NA	0	NA	NA	NA	NA	NA	NA	NA	NA	NA	NA	NA	NA	NA	NA	NA	NA	NA	NA	NA	NA
GPR157	G protein-coupled receptor 157	80045	ENSG00000180758	HGNC:23687	FLJ12132		01p36.22	protein-coding gene	Q5UAW9	0.31253	0.51978	0.31253	0	0	NA	NA|NA|NA	0	NA	NA|NA|NA	0	NA	NA|NA|NA	0	NA	NA|NA|NA	0	NA	NA|NA|NA	0	NA	1	NA	NA	NA	NA	NA	NA	NA	NA	NA	NA	NA	NA	NA	NA	NA	NA	NA	NA
GPR42	G protein-coupled receptor 42	2866	ENSG00000126251	HGNC:4500	GPR41L|FFAR3L	GPR42P	19q13.12	protein-coding gene	O15529	NA	NA	NA	NA	0	NA	NA|NA|NA	0	NA	NA|NA|NA	0	NA	NA|NA|NA	0	NA	NA|NA|NA	0	NA	NA|NA|NA	0	NA	1	NA	NA	NA	NA	NA	NA	NA	NA	NA	NA	NA	NA	NA	NA	NA	NA	NA	NA
GPR63	G protein-coupled receptor 63	81491	ENSG00000112218	HGNC:13302	PSP24(beta)|PSP24B		06q16.1	protein-coding gene	Q9BZJ6	0.39086	0.15376	0.15376	0	0	NA	NA|NA|NA	0	NA	NA|NA|NA	0	NA	NA|NA|NA	0	NA	NA|NA|NA	0	NA	NA|NA|NA	0	NA	NA	NA	NA	NA	NA	NA	NA	NA	NA	NA	NA	NA	NA	NA	NA	NA	NA	NA	NA
GPR75	G protein-coupled receptor 75	10936	ENSG00000119737	HGNC:4526	WI-31133		02p16.2	protein-coding gene	O95800	0.019784	0.010755	0.010755	0	0	NA	NA|NA|NA	0	NA	NA|NA|NA	0	NA	NA|NA|NA	0	NA	NA|NA|NA	0	NA	NA|NA|NA	0	NA	NA	NA	NA	1	NA	NA	NA	NA	1	1	1	1	NA	NA	NA	NA	NA	NA	NA
GPR75-ASB3	GPR75-ASB3 readthrough	100302652	ENSG00000270898	HGNC:40043			02p16.2	other		0.02792	0.014112	0.014112	0	0	NA	NA|NA|NA	0	NA	NA|NA|NA	0	NA	NA|NA|NA	0	NA	NA|NA|NA	0	NA	NA|NA|NA	0	NA	NA	NA	NA	1	NA	NA	NA	NA	1	1	1	1	NA	NA	NA	NA	NA	NA	NA
GPR89A	G protein-coupled receptor 89A	653519	ENSG00000117262	HGNC:31984	UNQ192		01q21.1	protein-coding gene	B7ZAQ6	NA	0.00052511	0.00052511	1	0	NA	NA|NA|NA	0	NA	NA|NA|NA	0	NA	NA|NA|NA	0	NA	NA|NA|NA	0	NA	NA|NA|NA	0	NA	NA	NA	NA	NA	NA	NA	NA	NA	NA	NA	NA	NA	NA	NA	NA	NA	NA	NA	NA
GPRIN1	G protein regulated inducer of neurite outgrowth 1	114787	ENSG00000169258	HGNC:24835	GRIN1|KIAA1893		05q35.2	protein-coding gene	Q7Z2K8	0.10431	0.21371	0.10431	0	0	NA	NA|NA|NA	0	NA	NA|NA|NA	0	NA	NA|NA|NA	0	NA	NA|NA|NA	0	NA	NA|NA|NA	0	NA	NA	NA	NA	NA	NA	NA	NA	NA	NA	NA	NA	NA	NA	NA	NA	NA	NA	NA	NA
GSC2	goosecoid homeobox 2	2928	ENSG00000063515	HGNC:4613		GSCL	22q11.21	protein-coding gene	O15499	0.5905	0.8709	0.5905	0	0	NA	NA|NA|NA	0	NA	NA|NA|NA	0	NA	NA|NA|NA	0	NA	NA|NA|NA	0	NA	NA|NA|NA	0	NA	NA	NA	NA	NA	NA	NA	NA	NA	NA	NA	NA	NA	NA	NA	NA	NA	NA	NA	NA
GTF3A	general transcription factor IIIA	2971	ENSG00000122034	HGNC:4662	TFIIIA|AP2		13q12.2	protein-coding gene	Q92664	0.45443	0.52476	0.45443	0	0	NA	NA|NA|NA	0	NA	NA|NA|NA	0	NA	NA|NA|NA	1	CI	0|NA|GM12878:IMR90:Mesenchymal_Stem_Cell:Mesendoderm	1	CI	0|NA|IMR90:Mesenchymal_Stem_Cell:Mesendoderm	2	1	NA	NA	NA	NA	NA	NA	NA	NA	NA	NA	NA	NA	NA	NA	NA	NA	NA	NA	NA
HEXA-AS1	HEXA antisense RNA 1	80072	ENSG00000260339	HGNC:25810	FLJ13315	C15orf34	15q23	non-coding RNA	Q9H8Q6	NA	NA	NA	NA	0	NA	NA|NA|NA	0	NA	NA|NA|NA	0	NA	NA|NA|NA	0	NA	NA|NA|NA	0	NA	NA|NA|NA	0	NA	1	NA	NA	NA	NA	NA	NA	NA	NA	NA	NA	NA	NA	NA	NA	NA	NA	NA	NA
HEXB	hexosaminidase subunit beta	3074	ENSG00000049860	HGNC:4879			05q13.3	protein-coding gene	P07686	0.50535	0.25494	0.25494	0	0	NA	NA|NA|NA	0	NA	NA|NA|NA	0	NA	NA|NA|NA	0	NA	NA|NA|NA	0	NA	NA|NA|NA	0	NA	NA	NA	NA	NA	NA	NA	NA	NA	NA	NA	NA	NA	NA	NA	NA	NA	NA	NA	NA
HGSNAT	heparan-alpha-glucosaminide N-acetyltransferase	138050	ENSG00000165102	HGNC:26527	FLJ32731|HGNAT	TMEM76	08p11.21-p11.1	protein-coding gene	Q68CP4	0.56295	0.30753	0.30753	0	0	NA	NA|NA|NA	0	NA	NA|NA|NA	0	NA	NA|NA|NA	0	NA	NA|NA|NA	0	NA	NA|NA|NA	0	NA	NA	NA	NA	NA	NA	NA	NA	NA	NA	NA	NA	NA	NA	NA	NA	NA	NA	NA	NA
HIRA	histone cell cycle regulator	7290	ENSG00000100084	HGNC:4916	DGCR1|TUP1	TUPLE1	22q11.21	protein-coding gene	P54198	0.61622	0.89472	0.61622	0	0	NA	NA|NA|NA	0	NA	NA|NA|NA	0	NA	NA|NA|NA	0	NA	NA|NA|NA	0	NA	NA|NA|NA	0	NA	NA	NA	NA	NA	NA	NA	NA	NA	NA	NA	NA	NA	NA	NA	NA	NA	NA	NA	NA
HMGN2	high mobility group nucleosomal binding domain 2	3151	ENSG00000198830	HGNC:4986		HMG17	01p36.11	protein-coding gene	P05204	0.29467	0.19924	0.19924	0	0	NA	NA|NA|NA	0	NA	NA|NA|NA	0	NA	NA|NA|NA	1	CI	0|NA|Left_Ventricle	0	NA	NA|NA|NA	1	1	NA	NA	NA	NA	NA	NA	NA	NA	NA	NA	NA	NA	NA	NA	NA	NA	NA	NA	NA
HNRNPLL	heterogeneous nuclear ribonucleoprotein L like	92906	ENSG00000143889	HGNC:25127		HNRPLL	02p22.1	protein-coding gene	Q8WVV9	0.71296	0.23837	0.23837	0	0	NA	NA|NA|NA	0	NA	NA|NA|NA	0	NA	NA|NA|NA	0	NA	NA|NA|NA	0	NA	NA|NA|NA	0	NA	1	NA	NA	NA	NA	NA	NA	NA	NA	NA	NA	NA	NA	NA	NA	NA	NA	NA	NA
HPD	4-hydroxyphenylpyruvate dioxygenase	3242	ENSG00000158104	HGNC:5147	4-HPPD|4HPPD|GLOD3	PPD	12q24.31	protein-coding gene	P32754	0.035778	0.011561	0.011561	0	0	NA	NA|NA|NA	0	NA	NA|NA|NA	0	NA	NA|NA|NA	0	NA	NA|NA|NA	0	NA	NA|NA|NA	0	NA	1	0	1	NA	NA	NA	NA	NA	0	NA	1	1	NA	NA	NA	NA	NA	NA	NA
HS2ST1	heparan sulfate 2-O-sulfotransferase 1	9653	ENSG00000153936	HGNC:5193	KIAA0448		01p22.3	protein-coding gene	Q7LGA3	0.20685	0.29613	0.20685	0	0	NA	NA|NA|NA	0	NA	NA|NA|NA	0	NA	NA|NA|NA	1	CI	0|NA|IMR90:Mesenchymal_Stem_Cell:Mesendoderm	1	CI	0|NA|IMR90:Mesenchymal_Stem_Cell:Mesendoderm	2	1	NA	NA	NA	NA	NA	NA	NA	NA	NA	NA	NA	NA	NA	NA	NA	NA	NA	NA	NA
HS3ST4	heparan sulfate-glucosamine 3-sulfotransferase 4	9951	ENSG00000182601	HGNC:5200	3OST4		16p12.1	protein-coding gene	Q9Y661	0.49426	0.61497	0.49426	0	0	NA	NA|NA|NA	0	NA	NA|NA|NA	0	NA	NA|NA|NA	0	NA	NA|NA|NA	0	NA	NA|NA|NA	0	NA	NA	NA	NA	NA	NA	NA	NA	NA	NA	NA	NA	NA	NA	NA	NA	NA	NA	NA	NA
HYKK	hydroxylysine kinase	123688	ENSG00000188266	HGNC:34403	LOC123688	AGPHD1	15q25.1	protein-coding gene	A2RU49	0.058981	0.03993	0.03993	0	0	NA	NA|NA|NA	0	NA	NA|NA|NA	0	NA	NA|NA|NA	0	NA	NA|NA|NA	0	NA	NA|NA|NA	0	NA	NA	0	1	1	NA	NA	NA	NA	1	1	2	1	NA	NA	NA	NA	NA	NA	NA
ICA1	islet cell autoantigen 1	3382	ENSG00000003147	HGNC:5343	ICAp69|ICA69		07p21.3	protein-coding gene	Q05084	0.028945	0.14242	0.028945	0	0	NA	NA|NA|NA	0	NA	NA|NA|NA	0	NA	NA|NA|NA	1	CI	0|NA|Mesenchymal_Stem_Cell	0	NA	NA|NA|NA	1	1	NA	NA	NA	NA	NA	NA	NA	NA	NA	NA	NA	NA	NA	NA	NA	NA	NA	NA	NA
ICE1	interactor of little elongation complex ELL subunit 1	23379	ENSG00000164151	HGNC:29154		KIAA0947	05p15.32	protein-coding gene	Q9Y2F5	0.02658	0.043839	0.02658	0	0	NA	NA|NA|NA	0	NA	NA|NA|NA	0	NA	NA|NA|NA	0	NA	NA|NA|NA	0	NA	NA|NA|NA	0	NA	NA	NA	NA	1	NA	NA	NA	NA	1	1	1	1	NA	NA	NA	NA	NA	NA	NA
IGIP	IgA inducing protein	492311	ENSG00000182700	HGNC:33847	LOC492311	C5orf53	05q31.3	protein-coding gene	A6NJ69	NA	0.0075202	0.0075202	0	0	NA	NA|NA|NA	0	NA	NA|NA|NA	0	NA	NA|NA|NA	0	NA	NA|NA|NA	0	NA	NA|NA|NA	0	NA	NA	NA	NA	NA	NA	NA	NA	NA	NA	NA	NA	NA	NA	NA	NA	NA	NA	NA	NA
IGSF10	immunoglobulin superfamily member 10	285313	ENSG00000152580	HGNC:26384	FLJ25972|CMF608		03q25.1	protein-coding gene	Q6WRI0	0.74168	0.33434	0.33434	0	0	NA	NA|NA|NA	0	NA	NA|NA|NA	0	NA	NA|NA|NA	0	NA	NA|NA|NA	0	NA	NA|NA|NA	0	NA	NA	NA	NA	NA	NA	NA	NA	NA	NA	NA	NA	NA	NA	NA	NA	NA	NA	NA	NA
IGSF3	immunoglobulin superfamily member 3	3321	ENSG00000143061	HGNC:5950	V8|EWI-3|MGC117164		01p13.1	protein-coding gene	O75054	0.27642	0.060953	0.060953	0	0	NA	NA|NA|NA	0	NA	NA|NA|NA	0	NA	NA|NA|NA	0	NA	NA|NA|NA	0	NA	NA|NA|NA	0	NA	NA	NA	NA	NA	NA	NA	NA	NA	NA	NA	NA	NA	NA	NA	NA	NA	NA	NA	NA
IQCK	IQ motif containing K	124152	ENSG00000174628	HGNC:28556	MGC35048|FLJ36575		16p12.3	protein-coding gene	Q8N0W5	0.010661	0.00048918	0.00048918	1	0	NA	NA|NA|NA	0	NA	NA|NA|NA	0	NA	NA|NA|NA	0	NA	NA|NA|NA	0	NA	NA|NA|NA	0	NA	NA	NA	NA	NA	NA	NA	NA	NA	NA	NA	NA	NA	NA	NA	NA	NA	NA	NA	NA
ITGB6	integrin subunit beta 6	3694	ENSG00000115221	HGNC:6161			02q24.2	protein-coding gene	P18564	0.21338	0.24042	0.21338	0	1	Positional	18|NA|NA	0	NA	NA|NA|NA	0	NA	NA|NA|NA	1	Positional,eQTL	18|GTEx/v8/Artery_Tibial|Aorta:Left_Ventricle:Liver:IMR90:Mesenchymal_Stem_Cell:Mesendoderm:Trophoblast-like_Cell:hESC	1	CI	0|NA|Aorta:Left_Ventricle:Liver:IMR90:Mesenchymal_Stem_Cell:Mesendoderm:Trophoblast-like_Cell:hESC	3	1	NA	NA	NA	NA	NA	NA	NA	NA	NA	NA	NA	NA	NA	NA	NA	NA	NA	NA	NA
KBTBD12	kelch repeat and BTB domain containing 12	166348	ENSG00000187715	HGNC:25731	FLJ46299	KLHDC6	03q21.3	protein-coding gene	Q3ZCT8	0.32594	0.036269	0.036269	0	0	NA	NA|NA|NA	0	NA	NA|NA|NA	0	NA	NA|NA|NA	0	NA	NA|NA|NA	0	NA	NA|NA|NA	0	NA	NA	NA	NA	NA	NA	NA	NA	NA	NA	NA	NA	NA	NA	NA	NA	NA	NA	NA	NA
KCNC3	potassium voltage-gated channel subfamily C member 3	3748	ENSG00000131398	HGNC:6235	Kv3.3	SCA13	19q13.33	protein-coding gene	Q14003	0.07412	0.0018711	0.0018711	0	0	NA	NA|NA|NA	0	NA	NA|NA|NA	0	NA	NA|NA|NA	0	NA	NA|NA|NA	0	NA	NA|NA|NA	0	NA	1	NA	NA	NA	NA	NA	NA	NA	NA	NA	NA	NA	NA	NA	NA	NA	NA	NA	NA
KCNH7	potassium voltage-gated channel subfamily H member 7	90134	ENSG00000184611	HGNC:18863	Kv11.3|HERG3|erg3		02q24.2	protein-coding gene	Q9NS40	0.32781	0.03559	0.03559	0	1	CI	0|NA|Fetal_Cortex	0	NA	NA|NA|NA	0	NA	NA|NA|NA	1	CI	0|NA|Fetal_Cortex	0	NA	NA|NA|NA	2	1	NA	NA	NA	NA	NA	NA	NA	NA	NA	NA	NA	NA	NA	NA	NA	NA	NA	NA	NA
KCNIP4	potassium voltage-gated channel interacting protein 4	80333	ENSG00000185774	HGNC:30083	CALP|KCHIP4|MGC44947		04p15.31-p15.2	protein-coding gene	Q6PIL6	0.12954	0.15982	0.12954	0	0	NA	NA|NA|NA	0	NA	NA|NA|NA	0	NA	NA|NA|NA	0	NA	NA|NA|NA	0	NA	NA|NA|NA	0	NA	NA	NA	NA	NA	NA	NA	NA	NA	NA	NA	NA	NA	NA	NA	NA	NA	NA	NA	NA
KCNMB3	potassium calcium-activated channel subfamily M regulatory beta subunit 3	27094	ENSG00000171121	HGNC:6287		KCNMB2|KCNMBL	03q26.32	protein-coding gene	Q9NPA1	0.082708	0.016599	0.016599	0	0	NA	NA|NA|NA	0	NA	NA|NA|NA	0	NA	NA|NA|NA	0	NA	NA|NA|NA	0	NA	NA|NA|NA	0	NA	1	NA	NA	NA	NA	NA	NA	NA	NA	NA	NA	NA	NA	NA	NA	NA	NA	NA	NA
KCTD20	potassium channel tetramerization domain containing 20	222658	ENSG00000112078	HGNC:21052	dJ108K11.3|MGC14254	C6orf69	06p21.31	protein-coding gene	Q7Z5Y7	0.22388	0.32164	0.22388	0	0	NA	NA|NA|NA	0	NA	NA|NA|NA	0	NA	NA|NA|NA	1	eQTL	0|eQTLGen_cis_eQTLs|NA	1	eQTL	0|eQTLGen_cis_eQTLs|NA	2	1	NA	NA	NA	NA	NA	NA	NA	NA	NA	NA	NA	NA	NA	NA	NA	NA	NA	NA	NA
KIF20B	kinesin family member 20B	9585	ENSG00000138182	HGNC:7212	MPP1|KRMP1|CT90	MPHOSPH1	10q23.31	protein-coding gene	Q96Q89	0.031254	0.066854	0.031254	0	0	NA	NA|NA|NA	0	NA	NA|NA|NA	0	NA	NA|NA|NA	0	NA	NA|NA|NA	0	NA	NA|NA|NA	0	NA	NA	NA	NA	1	NA	NA	NA	NA	1	1	1	1	NA	NA	NA	NA	NA	NA	NA
KIF24	kinesin family member 24	347240	ENSG00000186638	HGNC:19916	bA571F15.4|FLJ10933|FLJ43884	C9orf48	09p13.3	protein-coding gene	Q5T7B8	0.037832	0.025664	0.025664	0	0	NA	NA|NA|NA	0	NA	NA|NA|NA	0	NA	NA|NA|NA	0	NA	NA|NA|NA	0	NA	NA|NA|NA	0	NA	1	NA	NA	NA	NA	NA	NA	NA	NA	NA	NA	NA	NA	NA	NA	NA	NA	NA	NA
KIRREL1	kirre like nephrin family adhesion molecule 1	55243	ENSG00000183853	HGNC:15734	NEPH1	KIRREL	01q23.1	protein-coding gene	Q96J84	0.81434	0.97067	0.81434	0	0	NA	NA|NA|NA	0	NA	NA|NA|NA	0	NA	NA|NA|NA	0	NA	NA|NA|NA	0	NA	NA|NA|NA	0	NA	NA	NA	NA	NA	NA	NA	NA	NA	NA	NA	NA	NA	NA	NA	NA	NA	NA	NA	NA
KLB	klotho beta	152831	ENSG00000134962	HGNC:15527			04p14	protein-coding gene	Q86Z14	0.054874	0.41976	0.054874	0	0	NA	NA|NA|NA	0	NA	NA|NA|NA	0	NA	NA|NA|NA	0	NA	NA|NA|NA	0	NA	NA|NA|NA	0	NA	NA	NA	NA	NA	NA	NA	NA	NA	NA	NA	NA	NA	NA	NA	NA	NA	NA	NA	NA
KLHL32	kelch like family member 32	114792	ENSG00000186231	HGNC:21221		BKLHD5|KIAA1900	06q16.1	protein-coding gene	Q96NJ5	0.23196	0.36406	0.23196	0	0	NA	NA|NA|NA	0	NA	NA|NA|NA	0	NA	NA|NA|NA	0	NA	NA|NA|NA	0	NA	NA|NA|NA	0	NA	NA	NA	NA	NA	NA	NA	NA	NA	NA	NA	NA	NA	NA	NA	NA	NA	NA	NA	NA
KLHL38	kelch like family member 38	340359	ENSG00000175946	HGNC:34435	C8ORFK36		08q24.13	protein-coding gene	Q2WGJ6	0.46594	0.73623	0.46594	0	0	NA	NA|NA|NA	0	NA	NA|NA|NA	0	NA	NA|NA|NA	0	NA	NA|NA|NA	0	NA	NA|NA|NA	0	NA	NA	NA	NA	NA	NA	NA	NA	NA	NA	NA	NA	NA	NA	NA	NA	NA	NA	NA	NA
LINC02694	long intergenic non-protein coding RNA 2694	400359	ENSG00000175779	HGNC:33796	FLJ35695	C15orf53	15q14	non-coding RNA	Q8NAA6	0.035581	0.14491	0.035581	0	0	NA	NA|NA|NA	0	NA	NA|NA|NA	0	NA	NA|NA|NA	0	NA	NA|NA|NA	0	NA	NA|NA|NA	0	NA	NA	1	1	NA	NA	NA	NA	NA	1	1	1	1	NA	NA	NA	NA	NA	NA	NA
LIX1L	limb and CNS expressed 1 like	128077	ENSG00000271601	HGNC:28715	MGC46719		01q21.1	protein-coding gene	Q8IVB5	0.33828	0.0056213	0.0056213	0	0	NA	NA|NA|NA	0	NA	NA|NA|NA	0	NA	NA|NA|NA	0	NA	NA|NA|NA	0	NA	NA|NA|NA	0	NA	NA	NA	NA	NA	NA	NA	NA	NA	NA	NA	NA	NA	NA	NA	NA	NA	NA	NA	NA
LMO4	LIM domain only 4	8543	ENSG00000143013	HGNC:6644			01p22.3	protein-coding gene	P61968	0.60151	0.58264	0.58264	0	0	NA	NA|NA|NA	0	NA	NA|NA|NA	0	NA	NA|NA|NA	1	CI	0|NA|Fetal_Cortex:Aorta:Left_Ventricle:Liver:Pancreas:Right_Ventricle:GM12878:IMR90:Mesenchymal_Stem_Cell:Mesendoderm:Trophoblast-like_Cell:hESC	1	CI	0|NA|Fetal_Cortex:Aorta:Left_Ventricle:Liver:Pancreas:Right_Ventricle:GM12878:IMR90:Mesenchymal_Stem_Cell:Mesendoderm:Trophoblast-like_Cell:hESC	2	1	NA	NA	NA	NA	NA	NA	NA	NA	NA	NA	NA	NA	NA	NA	NA	NA	NA	NA	NA
LRATD1	LRAT domain containing 1	151354	ENSG00000162981	HGNC:20743	NSE1|FLJ35392	FAM84A	02p24.3	protein-coding gene	Q96KN4	0.69374	0.060302	0.060302	0	0	NA	NA|NA|NA	0	NA	NA|NA|NA	0	NA	NA|NA|NA	0	NA	NA|NA|NA	0	NA	NA|NA|NA	0	NA	1	NA	NA	NA	NA	NA	NA	NA	NA	NA	NA	NA	NA	NA	NA	NA	NA	NA	NA
LRRC43	leucine rich repeat containing 43	254050	ENSG00000158113	HGNC:28562	MGC35140		12q24.31	protein-coding gene	Q8N309	0.2468	0.00080944	0.00080944	1	0	NA	NA|NA|NA	0	NA	NA|NA|NA	0	NA	NA|NA|NA	0	NA	NA|NA|NA	0	NA	NA|NA|NA	0	NA	NA	NA	NA	NA	NA	NA	NA	NA	NA	NA	NA	NA	NA	NA	NA	NA	NA	NA	NA
LY6G5B	lymphocyte antigen 6 family member G5B	58496	ENSG00000240053	HGNC:13931	G5b	C6orf19	06p21.33	protein-coding gene	Q8NDX9	0.044304	0.0023464	0.0023464	0	0	NA	NA|NA|NA	0	NA	NA|NA|NA	0	NA	NA|NA|NA	0	NA	NA|NA|NA	0	NA	NA|NA|NA	0	NA	1	NA	NA	NA	NA	NA	NA	NA	NA	NA	NA	NA	NA	NA	NA	NA	NA	NA	NA
LY6G6D	lymphocyte antigen 6 family member G6D	58530	ENSG00000244355	HGNC:13935	MEGT1|Ly6-D|G6D|LY6-D|NG25	C6orf23	06p21.33	protein-coding gene	O95868	0.0013036	0.002351	0.0013036	0	0	NA	NA|NA|NA	0	NA	NA|NA|NA	0	NA	NA|NA|NA	0	NA	NA|NA|NA	0	NA	NA|NA|NA	0	NA	NA	NA	NA	NA	NA	1	1	NA	1	1	1	1	NA	NA	NA	NA	NA	NA	NA
LY6G6F	lymphocyte antigen 6 family member G6F	259215	ENSG00000204424	HGNC:13933	G6f|NG32	LY6G6D|C6orf21	06p21.33	protein-coding gene	Q5SQ64	0.0093102	0.0027427	0.0027427	0	0	NA	NA|NA|NA	0	NA	NA|NA|NA	0	NA	NA|NA|NA	0	NA	NA|NA|NA	0	NA	NA|NA|NA	0	NA	NA	NA	NA	NA	NA	1	1	NA	1	1	1	1	NA	NA	NA	NA	NA	NA	NA
LY75-CD302	LY75-CD302 readthrough	100526664	ENSG00000248672	HGNC:38828			02q24.2	other		0.04937	0.019871	0.019871	0	1	Positional	93|NA|NA	1	Positional	3|NA|NA	1	Positional	2|NA|NA	1	Positional,CI	93|NA|Aorta:Left_Ventricle:Liver:Pancreas:GM12878:IMR90:Mesenchymal_Stem_Cell:Mesendoderm:Trophoblast-like_Cell:hESC	1	Positional,CI	3|NA|IMR90:Mesenchymal_Stem_Cell:Mesendoderm:Trophoblast-like_Cell	4	1	NA	NA	NA	NA	NA	NA	NA	NA	NA	NA	NA	NA	NA	NA	NA	NA	NA	NA	NA
LZTR1	leucine zipper like transcription regulator 1	8216	ENSG00000099949	HGNC:6742	LZTR-1|BTBD29		22q11.21	protein-coding gene	Q8N653	0.8004	0.95458	0.8004	0	0	NA	NA|NA|NA	0	NA	NA|NA|NA	0	NA	NA|NA|NA	0	NA	NA|NA|NA	0	NA	NA|NA|NA	0	NA	NA	NA	NA	NA	NA	NA	NA	NA	NA	NA	NA	NA	NA	NA	NA	NA	NA	NA	NA
MANBA	mannosidase beta	4126	ENSG00000109323	HGNC:6831			04q24	protein-coding gene	O00462	0.20218	0.45982	0.20218	0	0	NA	NA|NA|NA	0	NA	NA|NA|NA	0	NA	NA|NA|NA	0	NA	NA|NA|NA	0	NA	NA|NA|NA	0	NA	NA	NA	NA	NA	NA	1	1	NA	1	1	1	1	NA	NA	NA	NA	NA	NA	NA
MAP3K6	mitogen-activated protein kinase kinase kinase 6	9064	ENSG00000142733	HGNC:6858	MAPKKK6|ASK2|MEKK6		01p36.11	protein-coding gene	O95382	0.71714	0.45555	0.45555	0	0	NA	NA|NA|NA	0	NA	NA|NA|NA	0	NA	NA|NA|NA	0	NA	NA|NA|NA	0	NA	NA|NA|NA	0	NA	NA	NA	NA	NA	NA	NA	NA	NA	NA	NA	NA	NA	NA	NA	NA	NA	NA	NA	NA
MARCHF7	membrane associated ring-CH-type finger 7	64844	ENSG00000136536	HGNC:17393	MARCH-VII|RNF177	AXOT|MARCH7	02q24.2	protein-coding gene	Q9H992	0.026783	0.0083614	0.0083614	0	1	Positional,CI	38|NA|Adult_Cortex:Fetal_Cortex	1	Positional	4|NA|NA	1	Positional	4|NA|NA	1	Positional,CI	38|NA|Adult_Cortex:Fetal_Cortex:Aorta:Left_Ventricle:Liver:Pancreas:Right_Ventricle:GM12878:IMR90:Mesenchymal_Stem_Cell:Mesendoderm:Trophoblast-like_Cell:hESC	1	Positional,CI	4|NA|Left_Ventricle:IMR90:Mesenchymal_Stem_Cell	4	1	NA	NA	NA	NA	NA	NA	NA	NA	NA	NA	NA	NA	NA	NA	NA	NA	NA	NA	NA
MATN1	matrilin 1	4146	ENSG00000162510	HGNC:6907		CRTM|CMP	01p35.2	protein-coding gene	P21941	0.70652	0.28391	0.28391	0	0	NA	NA|NA|NA	0	NA	NA|NA|NA	0	NA	NA|NA|NA	1	CI	0|NA|Spleen:GM12878:IMR90:Mesenchymal_Stem_Cell:Mesendoderm:Neural_Progenitor_Cell:Trophoblast-like_Cell:hESC	0	NA	NA|NA|NA	1	1	NA	NA	NA	NA	NA	NA	NA	NA	NA	NA	NA	NA	NA	NA	NA	NA	NA	NA	NA
MCHR1	melanin concentrating hormone receptor 1	2847	ENSG00000128285	HGNC:4479	SLC1|MCH1R	GPR24	22q13.2	protein-coding gene	Q99705	0.47225	0.15463	0.15463	0	0	NA	NA|NA|NA	0	NA	NA|NA|NA	0	NA	NA|NA|NA	1	eQTL	0|eQTLGen_cis_eQTLs:GTEx/v8/Ovary|NA	1	eQTL	0|eQTLGen_cis_eQTLs|NA	2	1	NA	NA	NA	NA	NA	NA	NA	NA	NA	NA	NA	NA	NA	NA	NA	NA	NA	NA	NA
MCHR2	melanin concentrating hormone receptor 2	84539	ENSG00000152034	HGNC:20867	SLT|MCH2|MCH2R	GPR145	06q16.2	protein-coding gene	Q969V1	0.018966	0.012183	0.012183	0	0	NA	NA|NA|NA	0	NA	NA|NA|NA	0	NA	NA|NA|NA	0	NA	NA|NA|NA	0	NA	NA|NA|NA	0	NA	NA	NA	NA	NA	NA	NA	NA	NA	NA	NA	NA	NA	1	NA	NA	NA	NA	NA	NA
MDGA2	MAM domain containing glycosylphosphatidylinositol anchor 2	161357	ENSG00000139915	HGNC:19835		MAMDC1	14q21.3	protein-coding gene	Q7Z553	0.0010996	0.0011477	0.0010996	0	0	NA	NA|NA|NA	0	NA	NA|NA|NA	0	NA	NA|NA|NA	0	NA	NA|NA|NA	0	NA	NA|NA|NA	0	NA	NA	NA	NA	1	NA	NA	NA	NA	1	1	1	1	NA	NA	NA	NA	NA	NA	NA
MED15	mediator complex subunit 15	51586	ENSG00000099917	HGNC:14248	TIG-1|CAG7A|Arc105	TNRC7|PCQAP	22q11.21	protein-coding gene	Q96RN5	0.3455	0.51168	0.3455	0	0	NA	NA|NA|NA	0	NA	NA|NA|NA	0	NA	NA|NA|NA	0	NA	NA|NA|NA	0	NA	NA|NA|NA	0	NA	NA	NA	NA	NA	NA	NA	NA	NA	NA	NA	NA	NA	NA	NA	NA	NA	NA	NA	NA
MEI1	meiotic double-stranded break formation protein 1	150365	ENSG00000167077	HGNC:28613	MGC40042|SPATA38		22q13.2	protein-coding gene	Q5TIA1	0.17026	0.28558	0.17026	0	0	NA	NA|NA|NA	0	NA	NA|NA|NA	0	NA	NA|NA|NA	1	eQTL	0|eQTLcatalogue/TwinsUK_ge_LCL:eQTLGen_cis_eQTLs:GTEx/v8/Esophagus_Muscularis:GTEx/v8/Heart_Left_Ventricle|NA	1	eQTL	0|eQTLGen_cis_eQTLs|NA	2	1	NA	NA	NA	NA	NA	NA	NA	NA	NA	NA	NA	NA	NA	NA	NA	NA	NA	NA	NA
MESD	mesoderm development LRP chaperone	23184	ENSG00000117899	HGNC:13520	KIAA0081|BOCA	MESDC2	15q25.1	protein-coding gene	Q14696	0.55877	0.116	0.116	0	0	NA	NA|NA|NA	0	NA	NA|NA|NA	0	NA	NA|NA|NA	1	CI	0|NA|IMR90:Mesenchymal_Stem_Cell:Mesendoderm:Trophoblast-like_Cell:hESC	0	NA	NA|NA|NA	1	1	NA	NA	NA	NA	NA	NA	NA	NA	NA	NA	NA	NA	NA	NA	NA	NA	NA	NA	NA
MINAR1	membrane integral NOTCH2 associated receptor 1	23251	ENSG00000169330	HGNC:29172	UBTOR	KIAA1024	15q25.1	protein-coding gene	Q9UPX6	0.19986	0.25484	0.19986	0	0	NA	NA|NA|NA	0	NA	NA|NA|NA	0	NA	NA|NA|NA	1	CI	0|NA|Mesendoderm	0	NA	NA|NA|NA	1	1	NA	NA	NA	NA	NA	NA	NA	NA	NA	NA	NA	NA	NA	NA	NA	NA	NA	NA	NA
MIR2113	microRNA 2113	100302164	ENSG00000238367	HGNC:37058	hsa-mir-2113		06q16.1	non-coding RNA		NA	NA	NA	NA	0	NA	NA|NA|NA	0	NA	NA|NA|NA	0	NA	NA|NA|NA	0	NA	NA|NA|NA	0	NA	NA|NA|NA	0	NA	NA	NA	NA	NA	NA	NA	NA	1	1	1	1	1	NA	NA	NA	NA	NA	NA	NA
MPIG6B	megakaryocyte and platelet inhibitory receptor G6b	80739	ENSG00000204420	HGNC:13937	G6b|NG31|G6b-B	C6orf25	06p21.33	protein-coding gene	O95866	0.019777	0.0014998	0.0014998	0	0	NA	NA|NA|NA	0	NA	NA|NA|NA	0	NA	NA|NA|NA	0	NA	NA|NA|NA	0	NA	NA|NA|NA	0	NA	1	NA	NA	NA	NA	NA	NA	NA	NA	NA	NA	NA	NA	NA	NA	NA	NA	NA	NA
MPL	MPL proto-oncogene, thrombopoietin receptor	4352	ENSG00000117400	HGNC:7217	CD110|TPOR|THPOR		01p34.2	protein-coding gene	P40238	0.5623	0.8207	0.5623	0	0	NA	NA|NA|NA	0	NA	NA|NA|NA	0	NA	NA|NA|NA	0	NA	NA|NA|NA	0	NA	NA|NA|NA	0	NA	NA	NA	NA	NA	NA	NA	NA	NA	NA	NA	NA	NA	NA	NA	NA	NA	0	1	NA
MRC1	mannose receptor C-type 1	4360	ENSG00000260314	HGNC:7228	CLEC13D|CD206|bA541I19.1|CLEC13DL	MRC1L1	10p12.33	protein-coding gene	P22897	NA	0.00028707	0.00028707	1	0	NA	NA|NA|NA	0	NA	NA|NA|NA	0	NA	NA|NA|NA	0	NA	NA|NA|NA	0	NA	NA|NA|NA	0	NA	NA	NA	NA	NA	NA	NA	NA	NA	NA	NA	NA	NA	NA	NA	NA	NA	NA	NA	NA
MUC16	mucin 16, cell surface associated	94025	ENSG00000181143	HGNC:15582	CA125|FLJ14303|CA-125		19p13.2	protein-coding gene	Q8WXI7	0.030626	0.070428	0.030626	0	0	NA	NA|NA|NA	0	NA	NA|NA|NA	0	NA	NA|NA|NA	0	NA	NA|NA|NA	0	NA	NA|NA|NA	0	NA	NA	NA	NA	NA	NA	NA	NA	1	1	1	1	1	NA	NA	NA	NA	NA	NA	NA
MUC6	mucin 6, oligomeric mucus/gel-forming	4588	ENSG00000184956	HGNC:7517			11p15.5	protein-coding gene	Q6W4X9	0.33622	0.38962	0.33622	0	0	NA	NA|NA|NA	0	NA	NA|NA|NA	0	NA	NA|NA|NA	0	NA	NA|NA|NA	0	NA	NA|NA|NA	0	NA	NA	NA	NA	NA	NA	NA	NA	NA	NA	NA	NA	NA	NA	NA	NA	NA	NA	NA	NA
MXD4	MAX dimerization protein 4	10608	ENSG00000123933	HGNC:13906	MAD4|MSTP149|MST149|bHLHc12		04p16.3	protein-coding gene	Q14582	0.087554	0.50314	0.087554	0	1	CI	0|NA|Promoter_anchored_loops:EP_correlation_cell_type_oneway	0	NA	NA|NA|NA	0	NA	NA|NA|NA	1	CI	0|NA|Promoter_anchored_loops:EP_correlation_cell_type_oneway:Adult_Cortex:Fetal_Cortex	0	NA	NA|NA|NA	2	1	NA	NA	NA	NA	NA	NA	NA	NA	NA	NA	NA	NA	NA	NA	NA	NA	NA	NA	NA
NAPSA	napsin A aspartic peptidase	9476	ENSG00000131400	HGNC:13395	NAP1|NAPA|Kdap|KAP		19q13.33	protein-coding gene	O96009	0.00066644	0.00032195	0.00032195	1	0	NA	NA|NA|NA	0	NA	NA|NA|NA	0	NA	NA|NA|NA	0	NA	NA|NA|NA	0	NA	NA|NA|NA	0	NA	NA	NA	NA	NA	NA	NA	NA	NA	NA	NA	NA	NA	NA	NA	NA	NA	NA	NA	NA
NAPSB	napsin B aspartic peptidase, pseudogene	256236	ENSG00000131401	HGNC:13396	NAP1L|NAP2|NAPB|NAPSBP		19q13.33	pseudogene		NA	NA	NA	NA	0	NA	NA|NA|NA	0	NA	NA|NA|NA	0	NA	NA|NA|NA	0	NA	NA|NA|NA	0	NA	NA|NA|NA	0	NA	1	NA	NA	NA	NA	NA	NA	NA	NA	NA	NA	NA	NA	NA	NA	NA	NA	NA	NA
NCKAP5	NCK associated protein 5	344148	ENSG00000176771	HGNC:29847	NAP5|ERIH1|ERIH2		02q21.2	protein-coding gene	O14513	0.42175	0.49148	0.42175	0	0	NA	NA|NA|NA	0	NA	NA|NA|NA	0	NA	NA|NA|NA	0	NA	NA|NA|NA	0	NA	NA|NA|NA	0	NA	NA	NA	NA	NA	NA	NA	NA	NA	NA	NA	NA	NA	NA	NA	NA	NA	NA	NA	NA
NEB	nebulin	4703	ENSG00000183091	HGNC:7720	NEB177D	NEM2	02q23.3	protein-coding gene	P20929	0.1517	0.043804	0.043804	0	0	NA	NA|NA|NA	0	NA	NA|NA|NA	0	NA	NA|NA|NA	0	NA	NA|NA|NA	0	NA	NA|NA|NA	0	NA	1	NA	NA	NA	NA	NA	NA	NA	NA	NA	NA	NA	NA	NA	NA	NA	NA	NA	NA
NEGR1	neuronal growth regulator 1	257194	ENSG00000172260	HGNC:17302	KILON|MGC46680|Ntra|IGLON4		01p31.1	protein-coding gene	Q7Z3B1	0.73614	0.72563	0.72563	0	0	NA	NA|NA|NA	0	NA	NA|NA|NA	0	NA	NA|NA|NA	0	NA	NA|NA|NA	0	NA	NA|NA|NA	0	NA	NA	1	1	NA	NA	NA	NA	NA	1	1	1	1	NA	NA	NA	NA	NA	NA	NA
NELFA	negative elongation factor complex member A	7469	ENSG00000185049	HGNC:12768	NELF-A	WHSC2	04p16.3	protein-coding gene	Q9H3P2	0.56512	0.69896	0.56512	0	0	NA	NA|NA|NA	0	NA	NA|NA|NA	0	NA	NA|NA|NA	1	CI	0|NA|IMR90	0	NA	NA|NA|NA	1	1	NA	NA	NA	NA	NA	NA	NA	NA	NA	NA	NA	NA	NA	NA	NA	NA	NA	NA	NA
NEO1	neogenin 1	4756	ENSG00000067141	HGNC:7754	NGN|HsT17534|IGDCC2|NTN1R2		15q24.1	protein-coding gene	Q92859	0.22212	0.19591	0.19591	0	0	NA	NA|NA|NA	0	NA	NA|NA|NA	0	NA	NA|NA|NA	1	CI	0|NA|Mesenchymal_Stem_Cell	1	CI	0|NA|Mesenchymal_Stem_Cell	2	1	NA	NA	NA	NA	NA	NA	NA	NA	NA	NA	NA	NA	NA	NA	NA	NA	NA	NA	NA
NFE2L3	NFE2 like bZIP transcription factor 3	9603	ENSG00000050344	HGNC:7783	Nrf3		07p15.2	protein-coding gene	Q9Y4A8	0.70587	0.2864	0.2864	0	0	NA	NA|NA|NA	0	NA	NA|NA|NA	0	NA	NA|NA|NA	0	NA	NA|NA|NA	0	NA	NA|NA|NA	0	NA	NA	NA	NA	NA	NA	NA	NA	NA	NA	NA	NA	NA	NA	NA	NA	NA	NA	NA	NA
NIPA1	NIPA magnesium transporter 1	123606	ENSG00000170113	HGNC:17043	MGC35570|SLC57A1	SPG6	15q11.2	protein-coding gene	Q7RTP0	0.51653	0.40558	0.40558	0	0	NA	NA|NA|NA	0	NA	NA|NA|NA	0	NA	NA|NA|NA	0	NA	NA|NA|NA	0	NA	NA|NA|NA	0	NA	NA	NA	NA	NA	NA	NA	NA	NA	NA	NA	NA	NA	NA	NA	NA	NA	NA	NA	NA
NISCH	nischarin	11188	ENSG00000010322	HGNC:18006	KIAA0975|I-1|IRAS		03p21.1	protein-coding gene	Q9Y2I1	0.43595	0.34984	0.34984	0	0	NA	NA|NA|NA	0	NA	NA|NA|NA	0	NA	NA|NA|NA	0	NA	NA|NA|NA	0	NA	NA|NA|NA	0	NA	NA	0	1	NA	NA	NA	NA	NA	0	NA	1	1	NA	NA	NA	NA	NA	NA	NA
NKX2-2	NK2 homeobox 2	4821	ENSG00000125820	HGNC:7835	NKX2.2	NKX2B	20p11.22	protein-coding gene	O95096	0.044106	0.066228	0.044106	0	0	NA	NA|NA|NA	0	NA	NA|NA|NA	0	NA	NA|NA|NA	0	NA	NA|NA|NA	0	NA	NA|NA|NA	0	NA	NA	NA	NA	NA	NA	1	1	NA	1	1	1	1	NA	NA	NA	NA	NA	NA	NA
NSUN5	NOP2/Sun RNA methyltransferase 5	55695	ENSG00000130305	HGNC:16385	NOL1R|p120(NOL1)|FLJ10267|NSUN5A|Ynl022cL	WBSCR20|WBSCR20A	07q11.23	protein-coding gene	Q96P11	NA	0.10773	0.10773	0	0	NA	NA|NA|NA	0	NA	NA|NA|NA	0	NA	NA|NA|NA	0	NA	NA|NA|NA	0	NA	NA|NA|NA	0	NA	NA	NA	NA	NA	NA	NA	NA	NA	NA	NA	NA	NA	NA	NA	NA	NA	NA	NA	NA
NUDT12	nudix hydrolase 12	83594	ENSG00000112874	HGNC:18826	DKFZP761I172		05q21.2	protein-coding gene	Q9BQG2	0.0067839	0.040962	0.0067839	0	0	NA	NA|NA|NA	0	NA	NA|NA|NA	0	NA	NA|NA|NA	0	NA	NA|NA|NA	0	NA	NA|NA|NA	0	NA	NA	NA	NA	NA	NA	1	1	NA	1	1	1	1	NA	NA	NA	NA	NA	NA	NA
OBSCN	obscurin, cytoskeletal calmodulin and titin-interacting RhoGEF	84033	ENSG00000154358	HGNC:15719	KIAA1556|UNC89|KIAA1639|ARHGEF30		01q42.13	protein-coding gene	Q5VST9	0.62466	0.69465	0.62466	0	0	NA	NA|NA|NA	0	NA	NA|NA|NA	0	NA	NA|NA|NA	0	NA	NA|NA|NA	0	NA	NA|NA|NA	0	NA	NA	NA	NA	NA	NA	NA	NA	NA	NA	NA	NA	NA	NA	NA	NA	NA	NA	NA	NA
OFCC1	orofacial cleft 1 candidate 1	266553	ENSG00000181355	HGNC:21017	MRDS1|Opo		06p24.3	other	Q8IZS5	0.55351	0.68374	0.55351	0	0	NA	NA|NA|NA	0	NA	NA|NA|NA	0	NA	NA|NA|NA	0	NA	NA|NA|NA	0	NA	NA|NA|NA	0	NA	NA	NA	NA	NA	NA	NA	NA	NA	NA	NA	NA	NA	NA	NA	NA	1	NA	NA	NA
OGFOD2	2-oxoglutarate and iron dependent oxygenase domain containing 2	79676	ENSG00000111325	HGNC:25823	FLJ13491|FLJ37501		12q24.31	protein-coding gene	Q6N063	0.0011513	0.0062922	0.0011513	0	0	NA	NA|NA|NA	0	NA	NA|NA|NA	0	NA	NA|NA|NA	0	NA	NA|NA|NA	0	NA	NA|NA|NA	0	NA	1	NA	NA	NA	NA	NA	NA	NA	NA	NA	NA	NA	NA	NA	NA	NA	NA	NA	NA
OR52A5	olfactory receptor family 52 subfamily A member 5	390054	ENSG00000171944	HGNC:19580			11p15.4	protein-coding gene	Q9H2C5	0.0006019	0.079048	0.0006019	1	0	NA	NA|NA|NA	0	NA	NA|NA|NA	0	NA	NA|NA|NA	0	NA	NA|NA|NA	0	NA	NA|NA|NA	0	NA	NA	NA	NA	NA	NA	NA	NA	NA	NA	NA	NA	NA	NA	NA	NA	NA	NA	NA	NA
OR56A1	olfactory receptor family 56 subfamily A member 1	120796	ENSG00000180934	HGNC:14781			11p15.4	protein-coding gene	Q8NGH5	0.9465	0.00019515	0.00019515	1	0	NA	NA|NA|NA	0	NA	NA|NA|NA	0	NA	NA|NA|NA	0	NA	NA|NA|NA	0	NA	NA|NA|NA	0	NA	NA	NA	NA	NA	NA	NA	NA	NA	NA	NA	NA	NA	NA	NA	NA	NA	NA	NA	NA
OR56B4	olfactory receptor family 56 subfamily B member 4	196335	ENSG00000180919	HGNC:15248			11p15.4	protein-coding gene	Q8NH76	0.0012119	0.00018585	0.00018585	1	0	NA	NA|NA|NA	0	NA	NA|NA|NA	0	NA	NA|NA|NA	0	NA	NA|NA|NA	0	NA	NA|NA|NA	0	NA	NA	NA	NA	NA	NA	NA	NA	NA	NA	NA	NA	NA	NA	NA	NA	NA	NA	NA	NA
OR8T1P	olfactory receptor family 8 subfamily T member 1 pseudogene	282791	ENSG00000226413	HGNC:19630			12q13.11	pseudogene		NA	NA	NA	NA	0	NA	NA|NA|NA	0	NA	NA|NA|NA	0	NA	NA|NA|NA	0	NA	NA|NA|NA	0	NA	NA|NA|NA	0	NA	1	NA	NA	NA	NA	NA	NA	NA	NA	NA	NA	NA	NA	NA	NA	NA	NA	NA	NA
OTUD1	OTU deubiquitinase 1	220213	ENSG00000165312	HGNC:27346	DUBA7	OTDC1	10p12.2	protein-coding gene	Q5VV17	0.002946	0.14184	0.002946	0	0	NA	NA|NA|NA	0	NA	NA|NA|NA	0	NA	NA|NA|NA	0	NA	NA|NA|NA	0	NA	NA|NA|NA	0	NA	NA	NA	NA	NA	NA	NA	NA	1	1	1	1	1	NA	NA	NA	NA	NA	NA	NA
OVCH1	ovochymase 1	341350	ENSG00000187950	HGNC:23080	OVCH		12p11.22	protein-coding gene	Q7RTY7	0.014247	0.00072295	0.00072295	1	0	NA	NA|NA|NA	0	NA	NA|NA|NA	0	NA	NA|NA|NA	0	NA	NA|NA|NA	0	NA	NA|NA|NA	0	NA	NA	NA	NA	NA	NA	NA	NA	NA	NA	NA	NA	NA	NA	NA	NA	NA	NA	NA	NA
P2RX2	purinergic receptor P2X 2	22953	ENSG00000187848	HGNC:15459	P2X2	DFNA41	12q24.33	protein-coding gene	Q9UBL9	0.50565	0.12278	0.12278	0	0	NA	NA|NA|NA	0	NA	NA|NA|NA	0	NA	NA|NA|NA	0	NA	NA|NA|NA	0	NA	NA|NA|NA	0	NA	NA	NA	NA	NA	NA	NA	NA	NA	NA	NA	NA	NA	NA	NA	NA	NA	NA	NA	NA
P2RX6	purinergic receptor P2X 6	9127	ENSG00000099957	HGNC:8538	P2XM|MGC129625|P2X6	P2RXL1	22q11.21	protein-coding gene	O15547	0.36339	0.93506	0.36339	0	0	NA	NA|NA|NA	0	NA	NA|NA|NA	0	NA	NA|NA|NA	0	NA	NA|NA|NA	0	NA	NA|NA|NA	0	NA	NA	NA	NA	NA	NA	NA	NA	NA	NA	NA	NA	NA	NA	NA	NA	NA	NA	NA	NA
P2RX6P	purinergic receptor P2X 6 pseudogene	440799	ENSG00000206145	HGNC:34076			22q11.21	pseudogene		NA	NA	NA	NA	0	NA	NA|NA|NA	0	NA	NA|NA|NA	0	NA	NA|NA|NA	0	NA	NA|NA|NA	0	NA	NA|NA|NA	0	NA	NA	NA	NA	NA	NA	NA	NA	NA	NA	NA	NA	NA	NA	NA	NA	NA	NA	NA	NA
P3H2	prolyl 3-hydroxylase 2	55214	ENSG00000090530	HGNC:19317	FLJ10718|MLAT4	LEPREL1	03q28	protein-coding gene	Q8IVL5	0.73447	0.81664	0.73447	0	0	NA	NA|NA|NA	0	NA	NA|NA|NA	0	NA	NA|NA|NA	0	NA	NA|NA|NA	0	NA	NA|NA|NA	0	NA	NA	NA	NA	NA	NA	NA	NA	NA	NA	NA	NA	NA	NA	NA	NA	NA	NA	NA	NA
PABPC5	poly(A) binding protein cytoplasmic 5	140886	ENSG00000174740	HGNC:13629	PABP5		Xq21.31	protein-coding gene	Q96DU9	NA	NA	NA	NA	0	NA	NA|NA|NA	0	NA	NA|NA|NA	0	NA	NA|NA|NA	0	NA	NA|NA|NA	0	NA	NA|NA|NA	0	NA	NA	NA	NA	NA	NA	NA	NA	NA	NA	NA	NA	NA	NA	NA	NA	NA	NA	NA	NA
PALM2AKAP2	PALM2 and AKAP2 fusion	445815	ENSG00000157654	HGNC:33529		PALM2-AKAP2	09q31.3	protein-coding gene		0.21265	0.33456	0.21265	0	0	NA	NA|NA|NA	0	NA	NA|NA|NA	0	NA	NA|NA|NA	0	NA	NA|NA|NA	0	NA	NA|NA|NA	0	NA	NA	NA	NA	NA	NA	NA	NA	NA	NA	NA	NA	NA	NA	NA	NA	NA	NA	NA	NA
PCDH11X	protocadherin 11 X-linked	27328	ENSG00000102290	HGNC:8656	PCDH-X|PCDHX|PPP1R119	PCDH11	Xq21.31	protein-coding gene	Q9BZA7	NA	NA	NA	NA	0	NA	NA|NA|NA	0	NA	NA|NA|NA	0	NA	NA|NA|NA	0	NA	NA|NA|NA	0	NA	NA|NA|NA	0	NA	NA	NA	NA	NA	NA	NA	NA	NA	NA	NA	NA	NA	NA	NA	NA	NA	NA	NA	NA
PCDHAC1	protocadherin alpha subfamily C, 1	56135	ENSG00000248383	HGNC:8676			05q31.3	other	Q9H158	0.063226	0.19901	0.063226	0	0	NA	NA|NA|NA	0	NA	NA|NA|NA	0	NA	NA|NA|NA	0	NA	NA|NA|NA	0	NA	NA|NA|NA	0	NA	NA	NA	NA	NA	NA	NA	NA	NA	NA	NA	NA	NA	NA	NA	NA	NA	NA	NA	NA
PCDHB12	protocadherin beta 12	56124	ENSG00000120328	HGNC:8683	PCDH-BETA12		05q31.3	other	Q9Y5F1	0.50709	0.53094	0.50709	0	0	NA	NA|NA|NA	0	NA	NA|NA|NA	0	NA	NA|NA|NA	0	NA	NA|NA|NA	0	NA	NA|NA|NA	0	NA	NA	NA	NA	NA	NA	NA	NA	NA	NA	NA	NA	NA	NA	NA	NA	NA	NA	NA	NA
PCDHB13	protocadherin beta 13	56123	ENSG00000187372	HGNC:8684	PCDH-BETA13		05q31.3	other	Q9Y5F0	0.37164	0.5272	0.37164	0	0	NA	NA|NA|NA	0	NA	NA|NA|NA	0	NA	NA|NA|NA	0	NA	NA|NA|NA	0	NA	NA|NA|NA	0	NA	NA	NA	NA	NA	NA	NA	NA	NA	NA	NA	NA	NA	NA	NA	NA	NA	NA	NA	NA
PCDHGA2	protocadherin gamma subfamily A, 2	56113	ENSG00000081853	HGNC:8700	PCDH-GAMMA-A2		05q31.3	other	Q9Y5H1	0.18611	0.18128	0.18128	0	0	NA	NA|NA|NA	0	NA	NA|NA|NA	0	NA	NA|NA|NA	0	NA	NA|NA|NA	0	NA	NA|NA|NA	0	NA	1	NA	NA	NA	NA	NA	NA	NA	NA	NA	NA	NA	NA	NA	NA	NA	NA	NA	NA
PCDHGA9	protocadherin gamma subfamily A, 9	56107	ENSG00000261934	HGNC:8707	PCDH-GAMMA-A9		05q31	other	Q9Y5G4	0.12146	0.13389	0.12146	0	0	NA	NA|NA|NA	0	NA	NA|NA|NA	0	NA	NA|NA|NA	0	NA	NA|NA|NA	0	NA	NA|NA|NA	0	NA	NA	NA	NA	NA	NA	NA	NA	NA	NA	NA	NA	NA	NA	NA	NA	NA	NA	NA	NA
PDCD1	programmed cell death 1	5133	ENSG00000188389	HGNC:8760	CD279|PD1|hSLE1|PD-1	SLEB2	02q37.3	protein-coding gene	Q15116	0.81317	0.45711	0.45711	0	0	NA	NA|NA|NA	0	NA	NA|NA|NA	0	NA	NA|NA|NA	0	NA	NA|NA|NA	0	NA	NA|NA|NA	0	NA	1	NA	NA	NA	NA	NA	NA	NA	NA	NA	NA	NA	NA	NA	NA	NA	NA	NA	NA
PDE6B	phosphodiesterase 6B	5158	ENSG00000133256	HGNC:8786	CSNB3|rd1|RP40|CSNBAD2	PDEB	04p16.3	protein-coding gene	P35913	0.071543	0.016581	0.016581	0	0	NA	NA|NA|NA	0	NA	NA|NA|NA	0	NA	NA|NA|NA	0	NA	NA|NA|NA	0	NA	NA|NA|NA	0	NA	1	NA	NA	NA	NA	NA	NA	NA	NA	NA	NA	NA	NA	NA	NA	NA	NA	NA	NA
PDE9A	phosphodiesterase 9A	5152	ENSG00000160191	HGNC:8795			21q22.3	protein-coding gene	O76083	0.22784	0.003811	0.003811	0	0	NA	NA|NA|NA	0	NA	NA|NA|NA	0	NA	NA|NA|NA	0	NA	NA|NA|NA	0	NA	NA|NA|NA	0	NA	1	NA	NA	NA	NA	NA	NA	NA	NA	NA	NA	NA	NA	NA	NA	NA	NA	NA	NA
PDGFRL	platelet derived growth factor receptor like	5157	ENSG00000104213	HGNC:8805	PRLTS		08p22	protein-coding gene	Q15198	0.012795	0.01451	0.012795	0	0	NA	NA|NA|NA	0	NA	NA|NA|NA	0	NA	NA|NA|NA	0	NA	NA|NA|NA	0	NA	NA|NA|NA	0	NA	1	NA	NA	NA	NA	NA	NA	NA	NA	NA	NA	NA	NA	NA	NA	NA	NA	NA	NA
PHF2	PHD finger protein 2	5253	ENSG00000197724	HGNC:8920	KIAA0662|JHDM1E|CENP-35|KDM7C		09q22.31	protein-coding gene	O75151	0.46181	0.42712	0.42712	0	0	NA	NA|NA|NA	0	NA	NA|NA|NA	0	NA	NA|NA|NA	0	NA	NA|NA|NA	0	NA	NA|NA|NA	0	NA	NA	NA	NA	NA	NA	NA	NA	NA	NA	NA	NA	NA	NA	NA	NA	NA	NA	NA	NA
PHOX2B	paired like homeobox 2B	8929	ENSG00000109132	HGNC:9143	NBPhox	PMX2B	04p13	protein-coding gene	Q99453	0.59721	0.40648	0.40648	0	0	NA	NA|NA|NA	0	NA	NA|NA|NA	0	NA	NA|NA|NA	0	NA	NA|NA|NA	0	NA	NA|NA|NA	0	NA	NA	1	1	NA	NA	NA	NA	NA	1	1	1	1	NA	NA	NA	NA	NA	NA	NA
PI16	peptidase inhibitor 16	221476	ENSG00000164530	HGNC:21245	MGC45378|dJ90K10.5|MSMBBP|CD364		06p21.2	protein-coding gene	Q6UXB8	0.033925	0.020755	0.020755	0	0	NA	NA|NA|NA	0	NA	NA|NA|NA	0	NA	NA|NA|NA	1	eQTL,CI	0|eQTLGen_cis_eQTLs|Promoter_anchored_loops	0	NA	NA|NA|NA	1	1	NA	NA	NA	NA	NA	NA	NA	NA	NA	NA	NA	NA	NA	NA	NA	NA	NA	NA	NA
PI4KAP1	phosphatidylinositol 4-kinase alpha pseudogene 1	728233	ENSG00000274602	HGNC:33576			22q11.21	pseudogene	Q8N8J0	NA	NA	NA	NA	0	NA	NA|NA|NA	0	NA	NA|NA|NA	0	NA	NA|NA|NA	0	NA	NA|NA|NA	0	NA	NA|NA|NA	0	NA	NA	NA	NA	NA	NA	NA	NA	NA	NA	NA	NA	NA	NA	NA	NA	NA	NA	NA	NA
PIWIL3	piwi like RNA-mediated gene silencing 3	440822	ENSG00000184571	HGNC:18443	HIWI3		22q11.23	protein-coding gene	Q7Z3Z3	0.52436	0.59371	0.52436	0	0	NA	NA|NA|NA	0	NA	NA|NA|NA	0	NA	NA|NA|NA	0	NA	NA|NA|NA	0	NA	NA|NA|NA	0	NA	NA	NA	NA	NA	NA	NA	NA	NA	NA	NA	NA	NA	NA	NA	NA	NA	NA	NA	NA
PLEK2	pleckstrin 2	26499	ENSG00000100558	HGNC:19238			14q23.3-q24.1	protein-coding gene	Q9NYT0	0.14424	0.37034	0.14424	0	0	NA	NA|NA|NA	0	NA	NA|NA|NA	0	NA	NA|NA|NA	0	NA	NA|NA|NA	0	NA	NA|NA|NA	0	NA	1	NA	NA	NA	NA	NA	NA	NA	NA	NA	NA	NA	NA	NA	NA	NA	NA	NA	NA
PLEKHH2	pleckstrin homology, MyTH4 and FERM domain containing H2	130271	ENSG00000152527	HGNC:30506	KIAA2028|PLEKHH1L		02p21	protein-coding gene	Q8IVE3	0.064975	0.062414	0.062414	0	0	NA	NA|NA|NA	0	NA	NA|NA|NA	0	NA	NA|NA|NA	1	CI	0|NA|IMR90:Mesenchymal_Stem_Cell	0	NA	NA|NA|NA	1	1	NA	NA	NA	NA	NA	NA	NA	NA	NA	NA	NA	NA	NA	NA	NA	NA	NA	NA	NA
POLD1	DNA polymerase delta 1, catalytic subunit	5424	ENSG00000062822	HGNC:9175	CDC2	POLD	19q13.3	protein-coding gene	P28340	0.0042331	0.00054987	0.00054987	1	0	NA	NA|NA|NA	0	NA	NA|NA|NA	0	NA	NA|NA|NA	0	NA	NA|NA|NA	0	NA	NA|NA|NA	0	NA	NA	NA	NA	NA	NA	NA	NA	NA	NA	NA	NA	NA	NA	NA	NA	NA	NA	NA	NA
POLE	DNA polymerase epsilon, catalytic subunit	5426	ENSG00000177084	HGNC:9177	POLE1		12q24.33	protein-coding gene	Q07864	0.14966	0.16967	0.14966	0	0	NA	NA|NA|NA	0	NA	NA|NA|NA	0	NA	NA|NA|NA	0	NA	NA|NA|NA	0	NA	NA|NA|NA	0	NA	NA	NA	NA	NA	NA	NA	NA	NA	NA	NA	NA	NA	NA	NA	NA	NA	NA	NA	NA
POLN	DNA polymerase nu	353497	ENSG00000130997	HGNC:18870			04p16.3	protein-coding gene	Q7Z5Q5	0.80989	0.68703	0.68703	0	1	CI	0|NA|Promoter_anchored_loops:EP_correlation_cell_type_oneway	0	NA	NA|NA|NA	0	NA	NA|NA|NA	1	CI	0|NA|Promoter_anchored_loops:EP_correlation_cell_type_oneway:Adult_Cortex	0	NA	NA|NA|NA	2	1	NA	NA	NA	NA	NA	NA	NA	NA	NA	NA	NA	NA	NA	NA	NA	NA	NA	NA	NA
POM121L4P	POM121 transmembrane nucleoporin like 4, pseudogene	266697	ENSG00000217261	HGNC:19326			22q11.2	pseudogene		NA	NA	NA	NA	0	NA	NA|NA|NA	0	NA	NA|NA|NA	0	NA	NA|NA|NA	0	NA	NA|NA|NA	0	NA	NA|NA|NA	0	NA	NA	NA	NA	NA	NA	NA	NA	NA	NA	NA	NA	NA	NA	NA	NA	NA	NA	NA	NA
POMP	proteasome maturation protein	51371	ENSG00000132963	HGNC:20330	HSPC014|UMP1	C13orf12	13q12.3	protein-coding gene	Q9Y244	0.52673	0.25554	0.25554	0	0	NA	NA|NA|NA	0	NA	NA|NA|NA	0	NA	NA|NA|NA	1	CI	0|NA|Mesenchymal_Stem_Cell	1	CI	0|NA|Mesenchymal_Stem_Cell	2	1	NA	NA	NA	NA	NA	NA	NA	NA	NA	NA	NA	NA	NA	NA	NA	NA	NA	NA	NA
POTEA	POTE ankyrin domain family member A	340441	ENSG00000188877	HGNC:33893	POTE8|POTE-8|CT104.3	A26A1	08p11.1	protein-coding gene	Q6S8J7	0.21436	0.32871	0.21436	0	0	NA	NA|NA|NA	0	NA	NA|NA|NA	0	NA	NA|NA|NA	0	NA	NA|NA|NA	0	NA	NA|NA|NA	0	NA	NA	NA	NA	NA	NA	NA	NA	NA	NA	NA	NA	NA	NA	NA	NA	NA	NA	NA	NA
POU4F3	POU class 4 homeobox 3	5459	ENSG00000091010	HGNC:9220	BRN3C	DFNA15|DFNA52|DFNA42	05q32	protein-coding gene	Q15319	0.1257	0.00041225	0.00041225	1	0	NA	NA|NA|NA	0	NA	NA|NA|NA	0	NA	NA|NA|NA	0	NA	NA|NA|NA	0	NA	NA|NA|NA	0	NA	NA	NA	NA	NA	NA	NA	NA	NA	NA	NA	NA	NA	NA	NA	NA	NA	NA	NA	NA
PPIL1	peptidylprolyl isomerase like 1	51645	ENSG00000137168	HGNC:9260	CYPL1		06p21.2	protein-coding gene	Q9Y3C6	0.61034	0.034961	0.034961	0	0	NA	NA|NA|NA	0	NA	NA|NA|NA	0	NA	NA|NA|NA	1	CI	0|NA|IMR90:Mesenchymal_Stem_Cell	0	NA	NA|NA|NA	1	1	NA	NA	NA	NA	NA	NA	NA	NA	NA	NA	NA	NA	NA	NA	NA	NA	NA	NA	NA
PPP1R16B	protein phosphatase 1 regulatory subunit 16B	26051	ENSG00000101445	HGNC:15850	KIAA0823|TIMAP|ANKRD4		20q11.23	protein-coding gene	Q96T49	0.18917	0.26444	0.18917	0	0	NA	NA|NA|NA	0	NA	NA|NA|NA	0	NA	NA|NA|NA	0	NA	NA|NA|NA	0	NA	NA|NA|NA	0	NA	NA	NA	NA	NA	NA	NA	NA	NA	NA	NA	NA	NA	NA	NA	NA	NA	NA	NA	NA
PRB1	proline rich protein BstNI subfamily 1	5542	ENSG00000251655	HGNC:9337	PM|PMF|PMS|PRB1M|PRB1L		12p13.2	protein-coding gene	P04280	0.0037126	0.0022904	0.0022904	0	0	NA	NA|NA|NA	0	NA	NA|NA|NA	0	NA	NA|NA|NA	0	NA	NA|NA|NA	0	NA	NA|NA|NA	0	NA	NA	NA	NA	NA	NA	NA	NA	NA	NA	NA	NA	NA	NA	NA	NA	NA	NA	NA	NA
PRKAG1	protein kinase AMP-activated non-catalytic subunit gamma 1	5571	ENSG00000181929	HGNC:9385			12q13.12	protein-coding gene	P54619	0.46022	0.10095	0.10095	0	0	NA	NA|NA|NA	0	NA	NA|NA|NA	0	NA	NA|NA|NA	1	CI	0|NA|GM12878:Mesenchymal_Stem_Cell:hESC	0	NA	NA|NA|NA	1	1	NA	NA	NA	NA	NA	NA	NA	NA	NA	NA	NA	NA	NA	NA	NA	NA	NA	NA	NA
PRODH	proline dehydrogenase 1	5625	ENSG00000100033	HGNC:9453	HSPOX2|PRODH1|PIG6|PRODH2|TP53I6		22q11.21	protein-coding gene	O43272	0.89672	0.81128	0.81128	0	0	NA	NA|NA|NA	0	NA	NA|NA|NA	0	NA	NA|NA|NA	0	NA	NA|NA|NA	0	NA	NA|NA|NA	0	NA	NA	NA	NA	NA	NA	NA	NA	NA	NA	NA	NA	NA	NA	NA	NA	NA	NA	NA	NA
PRR7	proline rich 7, synaptic	80758	ENSG00000131188	HGNC:28130	MGC10772		05q35.3	protein-coding gene	Q8TB68	0.20035	0.0004914	0.0004914	1	0	NA	NA|NA|NA	0	NA	NA|NA|NA	0	NA	NA|NA|NA	0	NA	NA|NA|NA	0	NA	NA|NA|NA	0	NA	NA	NA	NA	NA	NA	NA	NA	NA	NA	NA	NA	NA	NA	NA	NA	NA	NA	NA	NA
PRSS3	serine protease 3	5646	ENSG00000010438	HGNC:9486	TRY3|TRY4	PRSS4	09p13.3	protein-coding gene	P35030	0.034527	0.01512	0.01512	0	0	NA	NA|NA|NA	0	NA	NA|NA|NA	0	NA	NA|NA|NA	0	NA	NA|NA|NA	0	NA	NA|NA|NA	0	NA	1	NA	NA	NA	NA	NA	NA	NA	NA	NA	NA	NA	NA	NA	NA	NA	NA	NA	NA
PSKH1	protein serine kinase H1	5681	ENSG00000159792	HGNC:9529			16q22.1	protein-coding gene	P11801	0.014923	0.0086675	0.0086675	0	0	NA	NA|NA|NA	0	NA	NA|NA|NA	0	NA	NA|NA|NA	0	NA	NA|NA|NA	0	NA	NA|NA|NA	0	NA	NA	NA	NA	1	NA	NA	NA	NA	1	1	1	1	NA	NA	NA	NA	NA	NA	NA
PTBP2	polypyrimidine tract binding protein 2	58155	ENSG00000117569	HGNC:17662	brPTB|nPTB|PTB|PTBLP		01p21.3	protein-coding gene	Q9UKA9	0.29964	0.22301	0.22301	0	0	NA	NA|NA|NA	0	NA	NA|NA|NA	0	NA	NA|NA|NA	0	NA	NA|NA|NA	0	NA	NA|NA|NA	0	NA	NA	NA	NA	NA	1	NA	NA	NA	1	1	1	1	NA	NA	NA	NA	NA	NA	NA
RAB11FIP3	RAB11 family interacting protein 3	9727	ENSG00000090565	HGNC:17224	KIAA0665|Rab11-FIP3|eferin		16p13.3	protein-coding gene	O75154	0.74783	0.9341	0.74783	0	0	NA	NA|NA|NA	0	NA	NA|NA|NA	0	NA	NA|NA|NA	0	NA	NA|NA|NA	0	NA	NA|NA|NA	0	NA	NA	NA	NA	NA	NA	NA	NA	NA	NA	NA	NA	NA	NA	NA	NA	NA	NA	NA	NA
RAB19	RAB19, member RAS oncogene family	401409	ENSG00000146955	HGNC:19982	RAB19B		07q34	protein-coding gene	A4D1S5	0.82204	0.988	0.82204	0	0	NA	NA|NA|NA	0	NA	NA|NA|NA	0	NA	NA|NA|NA	0	NA	NA|NA|NA	0	NA	NA|NA|NA	0	NA	NA	NA	NA	NA	NA	NA	NA	NA	NA	NA	NA	NA	NA	NA	NA	NA	NA	NA	NA
RAB42	RAB42, member RAS oncogene family	115273	ENSG00000188060	HGNC:28702	MGC45806		01p35.3	protein-coding gene	Q8N4Z0	0.524	0.15909	0.15909	0	1	CI	0|NA|Promoter_anchored_loops	0	NA	NA|NA|NA	0	NA	NA|NA|NA	1	CI	0|NA|Promoter_anchored_loops	0	NA	NA|NA|NA	2	1	NA	NA	NA	NA	NA	NA	NA	NA	NA	NA	NA	NA	NA	NA	NA	NA	NA	NA	NA
RAB44	RAB44, member RAS oncogene family	401258	ENSG00000255587	HGNC:21068	dJ431A14.3	RASD3|RASL13	06p21.2	protein-coding gene	Q7Z6P3	0.029368	0.00018542	0.00018542	1	0	NA	NA|NA|NA	0	NA	NA|NA|NA	0	NA	NA|NA|NA	1	eQTL	0|eQTLcatalogue/Lepik_2017_ge_blood:eQTLGen_cis_eQTLs:BIOSQTL/BIOS_eQTL_geneLevel:GTEx/v8/Whole_Blood:GTEx/v8/Cells_Cultured_fibroblasts|NA	1	eQTL	0|eQTLcatalogue/Lepik_2017_ge_blood:eQTLGen_cis_eQTLs:BIOSQTL/BIOS_eQTL_geneLevel:GTEx/v8/Whole_Blood:GTEx/v8/Cells_Cultured_fibroblasts|NA	2	1	1	NA	NA	NA	NA	NA	NA	NA	NA	NA	NA	NA	NA	NA	NA	NA	NA	NA	NA
RAMAC	RNA guanine-7 methyltransferase activating subunit	83640	ENSG00000169612	HGNC:31022	HsT19360|C15orf18|MGC2560|RAM	FAM103A1|RAMMET	15q25.2	protein-coding gene	Q9BTL3	0.53244	0.6642	0.53244	0	0	NA	NA|NA|NA	0	NA	NA|NA|NA	0	NA	NA|NA|NA	1	CI	0|NA|Fetal_Cortex	0	NA	NA|NA|NA	1	1	NA	NA	NA	NA	NA	NA	NA	NA	NA	NA	NA	NA	NA	NA	NA	NA	NA	NA	NA
RANBP10	RAN binding protein 10	57610	ENSG00000141084	HGNC:29285	KIAA1464		16q22	protein-coding gene	Q6VN20	0.0045492	0.0055838	0.0045492	0	0	NA	NA|NA|NA	0	NA	NA|NA|NA	0	NA	NA|NA|NA	0	NA	NA|NA|NA	0	NA	NA|NA|NA	0	NA	NA	NA	NA	1	NA	NA	NA	NA	1	1	1	1	NA	NA	NA	NA	NA	NA	NA
RASL11A	RAS like family 11 member A	387496	ENSG00000122035	HGNC:23802			13q12.2	protein-coding gene	Q6T310	0.94025	0.40007	0.40007	0	1	eQTL	0|BRAINEAC/MEDU|NA	1	eQTL	0|BRAINEAC/MEDU|NA	0	NA	NA|NA|NA	1	eQTL	0|BRAINEAC/MEDU|NA	1	eQTL	0|BRAINEAC/MEDU|NA	4	1	NA	NA	NA	NA	NA	NA	NA	NA	NA	NA	NA	NA	NA	NA	NA	NA	NA	NA	NA
RBM12B	RNA binding motif protein 12B	389677	ENSG00000183808	HGNC:32310			08q22.1	protein-coding gene	Q8IXT5	0.051434	0.036732	0.036732	0	0	NA	NA|NA|NA	0	NA	NA|NA|NA	0	NA	NA|NA|NA	1	CI	0|NA|Mesenchymal_Stem_Cell:Mesendoderm:hESC	0	NA	NA|NA|NA	1	1	NA	NA	NA	NA	NA	NA	NA	NA	NA	NA	NA	NA	NA	NA	NA	NA	NA	NA	NA
RFWD3	ring finger and WD repeat domain 3	55159	ENSG00000168411	HGNC:25539	FLJ10520|RNF201|FANCW		16q23.1	protein-coding gene	Q6PCD5	0.15288	0.24265	0.15288	0	0	NA	NA|NA|NA	0	NA	NA|NA|NA	0	NA	NA|NA|NA	0	NA	NA|NA|NA	0	NA	NA|NA|NA	0	NA	NA	NA	NA	NA	NA	NA	NA	NA	NA	NA	NA	NA	NA	NA	NA	NA	0	1	NA
RGS12	regulator of G protein signaling 12	6002	ENSG00000159788	HGNC:9994			04p16.3	protein-coding gene	O14924	0.35355	0.67434	0.35355	0	0	NA	NA|NA|NA	0	NA	NA|NA|NA	0	NA	NA|NA|NA	1	eQTL	0|eQTLGen_cis_eQTLs|NA	0	NA	NA|NA|NA	1	1	NA	NA	NA	NA	NA	NA	NA	NA	NA	NA	NA	NA	NA	NA	NA	NA	NA	NA	NA
RHEBL1	RHEB like 1	121268	ENSG00000167550	HGNC:21166	MGC34869|FLJ25797|RHEB2		12q13.12	protein-coding gene	Q8TAI7	0.35771	0.15989	0.15989	0	1	CI	0|NA|Promoter_anchored_loops	0	NA	NA|NA|NA	0	NA	NA|NA|NA	1	CI	0|NA|Promoter_anchored_loops	0	NA	NA|NA|NA	2	1	NA	NA	NA	NA	NA	NA	NA	NA	NA	NA	NA	NA	NA	NA	NA	NA	NA	NA	NA
RIMBP3	RIMS binding protein 3	85376	ENSG00000275793	HGNC:29344	KIAA1666|RIMBP3.1|RIMBP3A		22q11.21	protein-coding gene	Q9UFD9	NA	NA	NA	NA	0	NA	NA|NA|NA	0	NA	NA|NA|NA	0	NA	NA|NA|NA	0	NA	NA|NA|NA	0	NA	NA|NA|NA	0	NA	NA	NA	NA	NA	NA	NA	NA	NA	NA	NA	NA	NA	NA	NA	NA	NA	NA	NA	NA
RMND5B	required for meiotic nuclear division 5 homolog B	64777	ENSG00000145916	HGNC:26181	FLJ22318|GID2|GID2B		05q35.3	protein-coding gene	Q96G75	0.10108	0.14554	0.10108	0	0	NA	NA|NA|NA	0	NA	NA|NA|NA	0	NA	NA|NA|NA	0	NA	NA|NA|NA	0	NA	NA|NA|NA	0	NA	NA	NA	NA	NA	NA	NA	NA	NA	NA	NA	NA	NA	NA	NA	NA	NA	NA	NA	NA
RNA5SP172	RNA, 5S ribosomal pseudogene 172	106478997	ENSG00000201931	HGNC:43072		RN5S172	04q34.3	pseudogene		NA	NA	NA	NA	0	NA	NA|NA|NA	0	NA	NA|NA|NA	0	NA	NA|NA|NA	0	NA	NA|NA|NA	0	NA	NA|NA|NA	0	NA	NA	NA	NA	NA	NA	NA	NA	1	1	1	1	1	NA	NA	NA	NA	NA	NA	NA
RNF169	ring finger protein 169	254225	ENSG00000166439	HGNC:26961	KIAA1991		11q13.4	protein-coding gene	Q8NCN4	0.37876	0.36544	0.36544	0	0	NA	NA|NA|NA	0	NA	NA|NA|NA	0	NA	NA|NA|NA	0	NA	NA|NA|NA	0	NA	NA|NA|NA	0	NA	NA	NA	NA	NA	NA	NA	NA	NA	NA	NA	NA	NA	NA	NA	NA	NA	NA	NA	NA
RNF215	ring finger protein 215	200312	ENSG00000099999	HGNC:33434			22q12.2	protein-coding gene	Q9Y6U7	0.044753	0.081504	0.044753	0	0	NA	NA|NA|NA	0	NA	NA|NA|NA	0	NA	NA|NA|NA	0	NA	NA|NA|NA	0	NA	NA|NA|NA	0	NA	1	NA	NA	NA	NA	NA	NA	NA	NA	NA	NA	NA	NA	NA	NA	NA	NA	NA	NA
RNU6-1228P	RNA, U6 small nuclear 1228, pseudogene	106480103	ENSG00000212316	HGNC:48191			09q21.13	pseudogene		NA	NA	NA	NA	0	NA	NA|NA|NA	0	NA	NA|NA|NA	0	NA	NA|NA|NA	0	NA	NA|NA|NA	0	NA	NA|NA|NA	0	NA	NA	NA	NA	NA	NA	NA	NA	1	1	1	1	1	NA	NA	NA	NA	NA	NA	NA
ROBO3	roundabout guidance receptor 3	64221	ENSG00000154134	HGNC:13433	RBIG1|FLJ21044|HGPS	HGPPS	11q24.2	protein-coding gene	Q96MS0	0.31159	0.76646	0.31159	0	0	NA	NA|NA|NA	0	NA	NA|NA|NA	0	NA	NA|NA|NA	0	NA	NA|NA|NA	0	NA	NA|NA|NA	0	NA	NA	NA	NA	NA	NA	NA	NA	NA	NA	NA	NA	NA	NA	NA	NA	NA	NA	NA	NA
RP1L1	RP1 like 1	94137	ENSG00000183638	HGNC:15946	DCDC4B		08p23.1	protein-coding gene	Q8IWN7	0.86302	0.93959	0.86302	0	0	NA	NA|NA|NA	0	NA	NA|NA|NA	0	NA	NA|NA|NA	0	NA	NA|NA|NA	0	NA	NA|NA|NA	0	NA	NA	NA	NA	NA	NA	NA	NA	NA	NA	NA	NA	NA	NA	NA	NA	NA	NA	NA	NA
RRM1	ribonucleotide reductase catalytic subunit M1	6240	ENSG00000167325	HGNC:10451			11p15.4	protein-coding gene	P23921	0.02286	0.033397	0.02286	0	0	NA	NA|NA|NA	0	NA	NA|NA|NA	0	NA	NA|NA|NA	0	NA	NA|NA|NA	0	NA	NA|NA|NA	0	NA	1	NA	NA	NA	NA	NA	NA	NA	NA	NA	NA	NA	NA	NA	NA	NA	NA	NA	NA
RTL10	retrotransposon Gag like 10	79680	ENSG00000215012	HGNC:26112	FLJ21125|BOP	C22orf29	22q11.21	protein-coding gene	Q7L3V2	0.84882	0.49348	0.49348	0	0	NA	NA|NA|NA	0	NA	NA|NA|NA	0	NA	NA|NA|NA	0	NA	NA|NA|NA	0	NA	NA|NA|NA	0	NA	NA	NA	NA	NA	NA	NA	NA	NA	NA	NA	NA	NA	NA	NA	NA	NA	NA	NA	NA
SAMD11	sterile alpha motif domain containing 11	148398	ENSG00000187634	HGNC:28706	MGC45873		01p36.33	protein-coding gene	Q96NU1	0.71583	0.86035	0.71583	0	0	NA	NA|NA|NA	0	NA	NA|NA|NA	0	NA	NA|NA|NA	0	NA	NA|NA|NA	0	NA	NA|NA|NA	0	NA	NA	NA	NA	NA	NA	NA	NA	NA	NA	NA	NA	NA	NA	NA	NA	NA	NA	NA	NA
SAXO2	stabilizer of axonemal microtubules 2	283726	ENSG00000188659	HGNC:33727	DKFZp666G057	FAM154B	15q25.2	protein-coding gene	Q658L1	0.033838	0.009095	0.009095	0	1	Positional,eQTL	5|CMC_SVA_cis:CMC_NoSVA_cis|NA	0	NA	NA|NA|NA	0	NA	NA|NA|NA	1	Positional,eQTL	5|eQTLcatalogue/Lepik_2017_ge_blood:eQTLGen_cis_eQTLs:BIOSQTL/BIOS_eQTL_geneLevel:CMC_SVA_cis:CMC_NoSVA_cis|Mesenchymal_Stem_Cell:Mesendoderm:hESC	1	eQTL	0|eQTLcatalogue/Lepik_2017_ge_blood:eQTLGen_cis_eQTLs:BIOSQTL/BIOS_eQTL_geneLevel:CMC_SVA_cis|NA	3	1	NA	NA	NA	NA	NA	NA	NA	NA	NA	NA	NA	NA	NA	NA	NA	NA	NA	NA	NA
SBNO1	strawberry notch homolog 1	55206	ENSG00000139697	HGNC:22973	MOP3|FLJ10701|FLJ10833|Sno		12q24.31	protein-coding gene	A3KN83	0.11098	0.0035937	0.0035937	0	0	NA	NA|NA|NA	0	NA	NA|NA|NA	0	NA	NA|NA|NA	0	NA	NA|NA|NA	0	NA	NA|NA|NA	0	NA	1	NA	NA	NA	NA	NA	NA	NA	NA	NA	NA	NA	NA	NA	NA	NA	NA	NA	NA
SCARF2	scavenger receptor class F member 2	91179	ENSG00000244486	HGNC:19869	SREC-II|SREC2|HUMZD58C02		22q11.21	protein-coding gene	Q96GP6	0.055536	0.16666	0.055536	0	0	NA	NA|NA|NA	0	NA	NA|NA|NA	0	NA	NA|NA|NA	0	NA	NA|NA|NA	0	NA	NA|NA|NA	0	NA	NA	NA	NA	NA	NA	NA	NA	NA	NA	NA	NA	NA	NA	NA	NA	NA	NA	NA	NA
SDC3	syndecan 3	9672	ENSG00000162512	HGNC:10660	N-syndecan|SYND3		01p35.2	protein-coding gene	O75056	0.42847	0.018181	0.018181	0	0	NA	NA|NA|NA	0	NA	NA|NA|NA	0	NA	NA|NA|NA	1	CI	0|NA|IMR90:Mesenchymal_Stem_Cell:Trophoblast-like_Cell	0	NA	NA|NA|NA	1	1	NA	NA	NA	NA	NA	NA	NA	NA	NA	NA	NA	NA	NA	NA	NA	NA	NA	NA	NA
SEL1L3	SEL1L family member 3	23231	ENSG00000091490	HGNC:29108	KIAA0746		04p15.2	protein-coding gene	Q68CR1	0.65024	0.72034	0.65024	0	0	NA	NA|NA|NA	0	NA	NA|NA|NA	0	NA	NA|NA|NA	0	NA	NA|NA|NA	0	NA	NA|NA|NA	0	NA	NA	NA	NA	NA	NA	NA	NA	NA	NA	NA	NA	NA	NA	NA	NA	NA	0	1	NA
SELENOF	selenoprotein F	9403	ENSG00000183291	HGNC:17705	SEP15		01p22.3	protein-coding gene	O60613	0.24894	0.40347	0.24894	0	0	NA	NA|NA|NA	0	NA	NA|NA|NA	0	NA	NA|NA|NA	1	CI	0|NA|IMR90:Mesenchymal_Stem_Cell:Mesendoderm	1	CI	0|NA|IMR90:Mesenchymal_Stem_Cell:Mesendoderm	2	1	NA	NA	NA	NA	NA	NA	NA	NA	NA	NA	NA	NA	NA	NA	NA	NA	NA	NA	NA
SEMA3E	semaphorin 3E	9723	ENSG00000170381	HGNC:10727	M-SemaK|KIAA0331|coll-5	SEMAH	07q21.11	protein-coding gene	O15041	0.020909	0.015738	0.015738	0	0	NA	NA|NA|NA	0	NA	NA|NA|NA	0	NA	NA|NA|NA	0	NA	NA|NA|NA	0	NA	NA|NA|NA	0	NA	NA	NA	NA	NA	NA	NA	NA	NA	NA	NA	NA	NA	NA	NA	NA	NA	NA	NA	NA
SEPTIN5	septin 5	5413	ENSG00000184702	HGNC:9164	HCDCREL-1|H5	PNUTL1|SEPT5	22q11.21	protein-coding gene	Q99719	NA	0.19867	0.19867	0	0	NA	NA|NA|NA	0	NA	NA|NA|NA	0	NA	NA|NA|NA	0	NA	NA|NA|NA	0	NA	NA|NA|NA	0	NA	NA	NA	NA	NA	NA	NA	NA	NA	NA	NA	NA	NA	NA	NA	NA	NA	NA	NA	NA
SERINC2	serine incorporator 2	347735	ENSG00000168528	HGNC:23231	FKSG84|PRO0899|TDE2	TDE2L	01p35.2	protein-coding gene	Q96SA4	0.6666	0.89314	0.6666	0	0	NA	NA|NA|NA	0	NA	NA|NA|NA	0	NA	NA|NA|NA	1	CI	0|NA|Left_Ventricle	0	NA	NA|NA|NA	1	1	NA	NA	NA	NA	NA	NA	NA	NA	NA	NA	NA	NA	NA	NA	NA	NA	NA	NA	NA
SGCZ	sarcoglycan zeta	137868	ENSG00000185053	HGNC:14075	ZSG1		08p22	protein-coding gene	Q96LD1	0.39184	0.52297	0.39184	0	0	NA	NA|NA|NA	0	NA	NA|NA|NA	0	NA	NA|NA|NA	0	NA	NA|NA|NA	0	NA	NA|NA|NA	0	NA	NA	NA	NA	NA	NA	NA	NA	NA	NA	NA	NA	NA	NA	NA	NA	NA	NA	NA	NA
SH3BP2	SH3 domain binding protein 2	6452	ENSG00000087266	HGNC:10825	RES4-23|CRBM		04p16.3	protein-coding gene	P78314	0.86316	0.72169	0.72169	0	0	NA	NA|NA|NA	0	NA	NA|NA|NA	0	NA	NA|NA|NA	1	eQTL	0|GTEx/v8/Thyroid|NA	0	NA	NA|NA|NA	1	1	NA	NA	NA	NA	NA	NA	NA	NA	NA	NA	NA	NA	NA	NA	NA	NA	NA	NA	NA
SHANK2	SH3 and multiple ankyrin repeat domains 2	22941	ENSG00000162105	HGNC:14295	CTTNBP1|ProSAP1|SHANK|SPANK-3	CORTBP1	11q13.3-q13.4	protein-coding gene	Q9UPX8	0.0018128	0.00099643	0.00099643	1	0	NA	NA|NA|NA	0	NA	NA|NA|NA	0	NA	NA|NA|NA	0	NA	NA|NA|NA	0	NA	NA|NA|NA	0	NA	NA	NA	NA	NA	NA	NA	NA	NA	NA	NA	NA	NA	NA	NA	NA	NA	NA	NA	NA
SLC23A2	solute carrier family 23 member 2	9962	ENSG00000089057	HGNC:10973	SVCT2|KIAA0238|YSPL2	SLC23A1	20p13	protein-coding gene	Q9UGH3	0.68301	0.96072	0.68301	0	0	NA	NA|NA|NA	0	NA	NA|NA|NA	0	NA	NA|NA|NA	0	NA	NA|NA|NA	0	NA	NA|NA|NA	0	NA	NA	NA	NA	NA	NA	NA	NA	NA	NA	NA	NA	NA	NA	NA	NA	NA	NA	NA	NA
SLC35G1	solute carrier family 35 member G1	159371	ENSG00000176273	HGNC:26607	FLJ33990|C10orf60	TMEM20	10q23.33	protein-coding gene	Q2M3R5	0.39207	0.61008	0.39207	0	0	NA	NA|NA|NA	0	NA	NA|NA|NA	0	NA	NA|NA|NA	0	NA	NA|NA|NA	0	NA	NA|NA|NA	0	NA	1	NA	NA	NA	NA	NA	NA	NA	NA	NA	NA	NA	NA	NA	NA	NA	NA	NA	NA
SLC43A1	solute carrier family 43 member 1	8501	ENSG00000149150	HGNC:9225	R00504|PB39	POV1	11q12.1	protein-coding gene	O75387	0.1797	0.34191	0.1797	0	0	NA	NA|NA|NA	0	NA	NA|NA|NA	0	NA	NA|NA|NA	0	NA	NA|NA|NA	0	NA	NA|NA|NA	0	NA	NA	0	1	NA	NA	NA	NA	NA	0	NA	1	1	NA	NA	NA	NA	NA	NA	NA
SLC45A1	solute carrier family 45 member 1	50651	ENSG00000162426	HGNC:17939		DNB5	01p36.23	protein-coding gene	Q9Y2W3	0.22507	0.015877	0.015877	0	0	NA	NA|NA|NA	0	NA	NA|NA|NA	0	NA	NA|NA|NA	0	NA	NA|NA|NA	0	NA	NA|NA|NA	0	NA	NA	1	1	NA	NA	NA	NA	NA	1	1	1	1	NA	NA	NA	NA	NA	NA	NA
SLC49A3	solute carrier family 49 member 3	84179	ENSG00000169026	HGNC:26177	FLJ22269|LP2561	MFSD7	04p16.3	protein-coding gene	Q6UXD7	0.013145	0.024833	0.013145	0	0	NA	NA|NA|NA	0	NA	NA|NA|NA	0	NA	NA|NA|NA	0	NA	NA|NA|NA	0	NA	NA|NA|NA	0	NA	1	NA	NA	NA	NA	NA	NA	NA	NA	NA	NA	NA	NA	NA	NA	NA	NA	NA	NA
SLC7A4	solute carrier family 7 member 4	6545	ENSG00000099960	HGNC:11062	HCAT3|CAT-4|VH		22q11.21	protein-coding gene	O43246	0.5966	0.9193	0.5966	0	0	NA	NA|NA|NA	0	NA	NA|NA|NA	0	NA	NA|NA|NA	0	NA	NA|NA|NA	0	NA	NA|NA|NA	0	NA	NA	NA	NA	NA	NA	NA	NA	NA	NA	NA	NA	NA	NA	NA	NA	NA	NA	NA	NA
SLCO4C1	solute carrier organic anion transporter family member 4C1	353189	ENSG00000173930	HGNC:23612	SLC21A20|OATP4C1|OATPX|OATP-H		05q21.1	protein-coding gene	Q6ZQN7	0.93893	0.5793	0.5793	0	0	NA	NA|NA|NA	0	NA	NA|NA|NA	0	NA	NA|NA|NA	0	NA	NA|NA|NA	0	NA	NA|NA|NA	0	NA	NA	NA	NA	NA	NA	NA	NA	NA	NA	NA	NA	NA	NA	NA	NA	NA	NA	NA	NA
SLCO6A1	solute carrier organic anion transporter family member 6A1	133482	ENSG00000205359	HGNC:23613	OATP6A1|OATPY|MGC26949|CT48		05q21.1	protein-coding gene	Q86UG4	0.6234	0.60415	0.60415	0	0	NA	NA|NA|NA	0	NA	NA|NA|NA	0	NA	NA|NA|NA	0	NA	NA|NA|NA	0	NA	NA|NA|NA	0	NA	NA	NA	NA	NA	NA	NA	NA	NA	NA	NA	NA	NA	NA	NA	NA	NA	NA	NA	NA
SNORA79	small nucleolar RNA, H/ACA box 79	677845	ENSG00000221303	HGNC:32665	ACA65|SNORA79A		14q31.1	non-coding RNA		NA	NA	NA	NA	0	NA	NA|NA|NA	0	NA	NA|NA|NA	0	NA	NA|NA|NA	0	NA	NA|NA|NA	0	NA	NA|NA|NA	0	NA	NA	NA	NA	NA	NA	NA	NA	NA	NA	NA	NA	NA	NA	NA	NA	NA	NA	NA	NA
SNORC	secondary ossification center associated regulator of chondrocyte maturation	389084	ENSG00000182600	HGNC:33763	UNQ830|ASCL830	C2orf82	02q37.1	protein-coding gene	Q6UX34	0.11193	0.012631	0.012631	0	0	NA	NA|NA|NA	0	NA	NA|NA|NA	0	NA	NA|NA|NA	0	NA	NA|NA|NA	0	NA	NA|NA|NA	0	NA	NA	NA	NA	NA	1	NA	NA	NA	1	1	1	1	NA	NA	NA	NA	NA	NA	NA
SOS1	SOS Ras/Rac guanine nucleotide exchange factor 1	6654	ENSG00000115904	HGNC:11187	HGF|GF1	GINGF	02p22.1	protein-coding gene	Q07889	0.73908	0.18942	0.18942	0	0	NA	NA|NA|NA	0	NA	NA|NA|NA	0	NA	NA|NA|NA	0	NA	NA|NA|NA	0	NA	NA|NA|NA	0	NA	1	NA	NA	NA	NA	NA	NA	NA	NA	NA	NA	NA	NA	NA	NA	NA	NA	NA	NA
SOWAHA	sosondowah ankyrin repeat domain family member A	134548	ENSG00000198944	HGNC:27033		ANKRD43	05q31.1	protein-coding gene	Q2M3V2	0.070178	0.017954	0.017954	0	0	NA	NA|NA|NA	0	NA	NA|NA|NA	0	NA	NA|NA|NA	0	NA	NA|NA|NA	0	NA	NA|NA|NA	0	NA	NA	NA	NA	NA	NA	NA	NA	NA	NA	NA	NA	NA	NA	NA	NA	NA	NA	NA	NA
SPAG17	sperm associated antigen 17	200162	ENSG00000155761	HGNC:26620	FLJ34497|PF6|RP4-776P7.2|CT143		01p12	protein-coding gene	Q6Q759	0.81114	0.74659	0.74659	0	0	NA	NA|NA|NA	0	NA	NA|NA|NA	0	NA	NA|NA|NA	0	NA	NA|NA|NA	0	NA	NA|NA|NA	0	NA	NA	NA	NA	NA	NA	NA	NA	NA	NA	NA	NA	NA	NA	NA	NA	NA	NA	NA	NA
SPINK1	serine peptidase inhibitor Kazal type 1	6690	ENSG00000164266	HGNC:11244	Spink3|PCTT|PSTI|TATI		05q32	protein-coding gene	P00995	0.80967	0.51975	0.51975	0	0	NA	NA|NA|NA	0	NA	NA|NA|NA	0	NA	NA|NA|NA	0	NA	NA|NA|NA	0	NA	NA|NA|NA	0	NA	NA	NA	NA	NA	NA	NA	NA	NA	NA	NA	NA	NA	NA	NA	NA	NA	NA	NA	NA
SPINK5	serine peptidase inhibitor Kazal type 5	11005	ENSG00000133710	HGNC:15464	VAKTI|LEKTI|LETKI|NETS|NS|FLJ21544|FLJ97536|FLJ97596|FLJ99794|DKFZp686K19184		05q32	protein-coding gene	Q9NQ38	0.82572	0.58373	0.58373	0	0	NA	NA|NA|NA	0	NA	NA|NA|NA	0	NA	NA|NA|NA	0	NA	NA|NA|NA	0	NA	NA|NA|NA	0	NA	NA	NA	NA	NA	NA	NA	NA	NA	NA	NA	NA	NA	NA	NA	NA	NA	NA	NA	NA
SPPL3	signal peptide peptidase like 3	121665	ENSG00000157837	HGNC:30424	IMP2|PSL4|MGC90402|MGC126674|MGC126676|DKFZP586C1324		12q24.31	protein-coding gene	Q8TCT6	0.051931	0.025168	0.025168	0	0	NA	NA|NA|NA	0	NA	NA|NA|NA	0	NA	NA|NA|NA	0	NA	NA|NA|NA	0	NA	NA|NA|NA	0	NA	NA	0	1	1	NA	NA	NA	NA	1	1	2	1	NA	NA	NA	NA	NA	NA	NA
SPRY2	sprouty RTK signaling antagonist 2	10253	ENSG00000136158	HGNC:11270	hSPRY2		13q31.1	protein-coding gene	O43597	0.49975	0.60742	0.49975	0	0	NA	NA|NA|NA	0	NA	NA|NA|NA	0	NA	NA|NA|NA	0	NA	NA|NA|NA	0	NA	NA|NA|NA	0	NA	NA	NA	NA	NA	NA	NA	NA	NA	NA	NA	NA	NA	NA	NA	NA	NA	0	1	NA
SPRY3	sprouty RTK signaling antagonist 3	10251	ENSG00000168939	HGNC:11271	HSPRY3		Xq28 and Yq12	protein-coding gene	O43610	NA	NA	NA	NA	0	NA	NA|NA|NA	0	NA	NA|NA|NA	0	NA	NA|NA|NA	0	NA	NA|NA|NA	0	NA	NA|NA|NA	0	NA	NA	NA	NA	NA	NA	NA	NA	NA	NA	NA	NA	NA	NA	NA	NA	NA	NA	NA	NA
ST20	suppressor of tumorigenicity 20	400410	ENSG00000180953	HGNC:33520	HCCS-1		15q25.1	protein-coding gene	Q9HBF5	0.73992	0.71802	0.71802	0	0	NA	NA|NA|NA	0	NA	NA|NA|NA	0	NA	NA|NA|NA	1	CI	0|NA|IMR90	0	NA	NA|NA|NA	1	1	NA	NA	NA	NA	NA	NA	NA	NA	NA	NA	NA	NA	NA	NA	NA	NA	NA	NA	NA
ST20-AS1	ST20 antisense RNA 1	283687	ENSG00000259642	HGNC:27521	FLJ33788	C15orf37	15q25.1	non-coding RNA	Q8NBB2	NA	NA	NA	NA	0	NA	NA|NA|NA	0	NA	NA|NA|NA	0	NA	NA|NA|NA	1	CI	0|NA|IMR90	0	NA	NA|NA|NA	1	1	NA	NA	NA	NA	NA	NA	NA	NA	NA	NA	NA	NA	NA	NA	NA	NA	NA	NA	NA
ST20-MTHFS	ST20-MTHFS readthrough	100528021	ENSG00000259332	HGNC:44655			15q25.1	other		0.68643	0.71757	0.68643	0	0	NA	NA|NA|NA	0	NA	NA|NA|NA	0	NA	NA|NA|NA	1	CI	0|NA|IMR90	0	NA	NA|NA|NA	1	1	NA	NA	NA	NA	NA	NA	NA	NA	NA	NA	NA	NA	NA	NA	NA	NA	NA	NA	NA
ST3GAL3	ST3 beta-galactoside alpha-2,3-sialyltransferase 3	6487	ENSG00000126091	HGNC:10866		SIAT6|MRT12	01p34.1	protein-coding gene	Q11203	0.40961	0.37951	0.37951	0	0	NA	NA|NA|NA	0	NA	NA|NA|NA	0	NA	NA|NA|NA	0	NA	NA|NA|NA	0	NA	NA|NA|NA	0	NA	NA	NA	NA	NA	NA	1	1	NA	1	1	1	1	NA	NA	NA	NA	NA	NA	NA
STAB2	stabilin 2	55576	ENSG00000136011	HGNC:18629	DKFZP434E0321|FELL|STAB-2|HARE|FEEL-2|SCARH1		12q23.3	protein-coding gene	Q8WWQ8	0.63418	0.37105	0.37105	0	0	NA	NA|NA|NA	0	NA	NA|NA|NA	0	NA	NA|NA|NA	0	NA	NA|NA|NA	0	NA	NA|NA|NA	0	NA	NA	NA	NA	NA	NA	NA	NA	NA	NA	NA	NA	NA	NA	NA	NA	NA	NA	NA	NA
STARD3NL	STARD3 N-terminal like	83930	ENSG00000010270	HGNC:19169	MENTHO|MGC3251		07p14-p13	protein-coding gene	O95772	0.14336	0.14949	0.14336	0	0	NA	NA|NA|NA	0	NA	NA|NA|NA	0	NA	NA|NA|NA	0	NA	NA|NA|NA	0	NA	NA|NA|NA	0	NA	1	NA	NA	NA	NA	NA	NA	NA	NA	NA	NA	NA	NA	NA	NA	NA	NA	NA	NA
STARD5	StAR related lipid transfer domain containing 5	80765	ENSG00000172345	HGNC:18065	MGC10327		15q25.1	protein-coding gene	Q9NSY2	0.24036	0.058197	0.058197	0	0	NA	NA|NA|NA	0	NA	NA|NA|NA	0	NA	NA|NA|NA	1	CI	0|NA|Aorta:Left_Ventricle:Liver:GM12878:IMR90:Mesenchymal_Stem_Cell:Mesendoderm:Trophoblast-like_Cell:hESC	0	NA	NA|NA|NA	1	1	NA	NA	NA	NA	NA	NA	NA	NA	NA	NA	NA	NA	NA	NA	NA	NA	NA	NA	NA
STARD9	StAR related lipid transfer domain containing 9	57519	ENSG00000159433	HGNC:19162	KIAA1300|KIF16A		15q15.2	protein-coding gene	Q9P2P6	0.42974	0.3719	0.3719	0	0	NA	NA|NA|NA	0	NA	NA|NA|NA	0	NA	NA|NA|NA	0	NA	NA|NA|NA	0	NA	NA|NA|NA	0	NA	NA	NA	NA	NA	NA	NA	NA	NA	NA	NA	NA	NA	NA	NA	NA	NA	NA	NA	NA
SYCE1L	synaptonemal complex central element protein 1 like	100130958	ENSG00000205078	HGNC:37236	MRP2		16q23.1	protein-coding gene	A8MT33	0.81179	0.72116	0.72116	0	0	NA	NA|NA|NA	0	NA	NA|NA|NA	0	NA	NA|NA|NA	1	eQTL,CI	0|BIOSQTL/BIOS_eQTL_geneLevel|Mesendoderm:hESC	1	eQTL	0|BIOSQTL/BIOS_eQTL_geneLevel|NA	2	1	NA	NA	NA	NA	NA	NA	NA	NA	NA	NA	NA	NA	NA	NA	NA	NA	NA	NA	NA
SYNJ2	synaptojanin 2	8871	ENSG00000078269	HGNC:11504	INPP5H		06q25.3	protein-coding gene	O15056	0.85614	0.95439	0.85614	0	0	NA	NA|NA|NA	0	NA	NA|NA|NA	0	NA	NA|NA|NA	0	NA	NA|NA|NA	0	NA	NA|NA|NA	0	NA	NA	NA	NA	NA	NA	NA	NA	NA	NA	NA	NA	NA	NA	NA	NA	NA	NA	NA	NA
TANGO2	transport and golgi organization 2 homolog	128989	ENSG00000183597	HGNC:25439	DKFZp761P1121	C22orf25	22q11.21	protein-coding gene	Q6ICL3	0.26982	0.7273	0.26982	0	0	NA	NA|NA|NA	0	NA	NA|NA|NA	0	NA	NA|NA|NA	0	NA	NA|NA|NA	0	NA	NA|NA|NA	0	NA	NA	NA	NA	NA	NA	NA	NA	NA	NA	NA	NA	NA	NA	NA	NA	NA	NA	NA	NA
TBC1D3H	TBC1 domain family member 3H	729877	ENSG00000274226	HGNC:30708			17q12	protein-coding gene	P0C7X1	NA	0.00026647	0.00026647	1	0	NA	NA|NA|NA	0	NA	NA|NA|NA	0	NA	NA|NA|NA	0	NA	NA|NA|NA	0	NA	NA|NA|NA	0	NA	NA	NA	NA	NA	NA	NA	NA	NA	NA	NA	NA	NA	NA	NA	NA	NA	NA	NA	NA
TBCB	tubulin folding cofactor B	1155	ENSG00000105254	HGNC:1989	CG22|CKAPI	CKAP1	19q13.12	protein-coding gene	Q99426	0.0026686	0.0061998	0.0026686	0	0	NA	NA|NA|NA	0	NA	NA|NA|NA	0	NA	NA|NA|NA	0	NA	NA|NA|NA	0	NA	NA|NA|NA	0	NA	1	NA	NA	NA	NA	NA	NA	NA	NA	NA	NA	NA	NA	NA	NA	NA	NA	NA	NA
TBX1	T-box transcription factor 1	6899	ENSG00000184058	HGNC:11592	CATCH22	VCF	22q11.21	protein-coding gene	O43435	0.24034	0.20032	0.20032	0	0	NA	NA|NA|NA	0	NA	NA|NA|NA	0	NA	NA|NA|NA	0	NA	NA|NA|NA	0	NA	NA|NA|NA	0	NA	NA	NA	NA	NA	NA	NA	NA	NA	NA	NA	NA	NA	NA	NA	NA	NA	NA	NA	NA
TEK	TEK receptor tyrosine kinase	7010	ENSG00000120156	HGNC:11724	TIE2|TIE-2|VMCM1|CD202b	VMCM	09p21.2	protein-coding gene	Q02763	0.45095	0.61534	0.45095	0	0	NA	NA|NA|NA	0	NA	NA|NA|NA	0	NA	NA|NA|NA	0	NA	NA|NA|NA	0	NA	NA|NA|NA	0	NA	NA	NA	NA	NA	NA	NA	NA	NA	NA	NA	NA	NA	NA	NA	NA	NA	NA	NA	NA
TGFBRAP1	transforming growth factor beta receptor associated protein 1	9392	ENSG00000135966	HGNC:16836	TRAP-1|TRAP1|VPS3		02q12.1-q12.2	protein-coding gene	Q8WUH2	0.00032263	0.0001931	0.0001931	1	0	NA	NA|NA|NA	0	NA	NA|NA|NA	0	NA	NA|NA|NA	0	NA	NA|NA|NA	0	NA	NA|NA|NA	0	NA	NA	NA	NA	NA	NA	NA	NA	NA	NA	NA	NA	NA	NA	NA	NA	NA	NA	NA	NA
THEM7P	thioesterase superfamily member 7, pseudogene	106480297	ENSG00000227160	HGNC:50386	RP1-65P5.1		11p13	pseudogene		NA	NA	NA	NA	0	NA	NA|NA|NA	0	NA	NA|NA|NA	0	NA	NA|NA|NA	0	NA	NA|NA|NA	0	NA	NA|NA|NA	0	NA	1	NA	NA	NA	NA	NA	NA	NA	NA	NA	NA	NA	NA	NA	NA	NA	NA	NA	NA
TIMP2	TIMP metallopeptidase inhibitor 2	7077	ENSG00000035862	HGNC:11821	CSC-21K		17q25.3	protein-coding gene	P16035	0.036179	0.023016	0.023016	0	0	NA	NA|NA|NA	0	NA	NA|NA|NA	0	NA	NA|NA|NA	0	NA	NA|NA|NA	0	NA	NA|NA|NA	0	NA	1	NA	NA	NA	NA	NA	NA	NA	NA	NA	NA	NA	NA	NA	NA	NA	NA	NA	NA
TLCD4	TLC domain containing 4	148534	ENSG00000152078	HGNC:26477	FLJ31842	TMEM56	01p21.3	protein-coding gene	Q96MV1	0.21232	0.006838	0.006838	0	0	NA	NA|NA|NA	0	NA	NA|NA|NA	0	NA	NA|NA|NA	0	NA	NA|NA|NA	0	NA	NA|NA|NA	0	NA	NA	NA	NA	NA	1	NA	NA	NA	1	1	1	1	NA	NA	NA	NA	NA	NA	NA
TLNRD1	talin rod domain containing 1	59274	ENSG00000140406	HGNC:13519	MGC99595	MESDC1	15q25.1	protein-coding gene	Q9H1K6	NA	0.058445	0.058445	0	0	NA	NA|NA|NA	0	NA	NA|NA|NA	0	NA	NA|NA|NA	1	CI	0|NA|IMR90:Mesenchymal_Stem_Cell:Mesendoderm:Trophoblast-like_Cell:hESC	0	NA	NA|NA|NA	1	1	NA	NA	NA	NA	NA	NA	NA	NA	NA	NA	NA	NA	NA	NA	NA	NA	NA	NA	NA
TM6SF1	transmembrane 6 superfamily member 1	53346	ENSG00000136404	HGNC:11860			15q25.2	protein-coding gene	Q9BZW5	0.52609	0.7516	0.52609	0	0	NA	NA|NA|NA	0	NA	NA|NA|NA	0	NA	NA|NA|NA	1	CI	0|NA|Mesenchymal_Stem_Cell:Mesendoderm:hESC	0	NA	NA|NA|NA	1	1	NA	NA	NA	NA	NA	NA	NA	NA	NA	NA	NA	NA	NA	NA	NA	NA	NA	NA	NA
TMED3	transmembrane p24 trafficking protein 3	23423	ENSG00000166557	HGNC:28889	p24B|p24gamma4|p24g4	C15orf22	15q25.1	protein-coding gene	Q9Y3Q3	0.08994	0.017841	0.017841	0	0	NA	NA|NA|NA	0	NA	NA|NA|NA	0	NA	NA|NA|NA	1	CI	0|NA|Left_Ventricle:Mesenchymal_Stem_Cell	0	NA	NA|NA|NA	1	1	NA	NA	NA	NA	NA	NA	NA	NA	NA	NA	NA	NA	NA	NA	NA	NA	NA	NA	NA
TMEM170A	transmembrane protein 170A	124491	ENSG00000166822	HGNC:29577	FLJ37611	TMEM170	16q23.1	protein-coding gene	Q8WVE7	0.73051	0.65036	0.65036	0	0	NA	NA|NA|NA	0	NA	NA|NA|NA	0	NA	NA|NA|NA	1	CI	0|NA|Left_Ventricle:IMR90:Mesenchymal_Stem_Cell:Mesendoderm:Trophoblast-like_Cell	0	NA	NA|NA|NA	1	1	NA	NA	NA	NA	NA	NA	NA	NA	NA	NA	NA	NA	NA	NA	NA	NA	NA	NA	NA
TMEM178B	transmembrane protein 178B	100507421	ENSG00000261115	HGNC:44112	DKFZp547G036		07q34	protein-coding gene	H3BS89	0.00064498	0.0020547	0.00064498	1	0	NA	NA|NA|NA	0	NA	NA|NA|NA	0	NA	NA|NA|NA	0	NA	NA|NA|NA	0	NA	NA|NA|NA	0	NA	NA	NA	NA	NA	NA	NA	NA	NA	NA	NA	NA	NA	NA	NA	NA	NA	NA	NA	NA
TMEM191A	transmembrane protein 191A (pseudogene)	84222	ENSG00000226287	HGNC:25317	DKFZp434N035|TMEM191AP		22q11.21	pseudogene	Q9H0A3	NA	NA	NA	NA	0	NA	NA|NA|NA	0	NA	NA|NA|NA	0	NA	NA|NA|NA	0	NA	NA|NA|NA	0	NA	NA|NA|NA	0	NA	NA	NA	NA	NA	NA	NA	NA	NA	NA	NA	NA	NA	NA	NA	NA	NA	NA	NA	NA
TMEM67	transmembrane protein 67	91147	ENSG00000164953	HGNC:28396	MGC26979|JBTS6|NPHP11	MKS3	08q22.1	protein-coding gene	Q5HYA8	0.030659	0.081249	0.030659	0	0	NA	NA|NA|NA	0	NA	NA|NA|NA	0	NA	NA|NA|NA	1	CI	0|NA|Mesenchymal_Stem_Cell	0	NA	NA|NA|NA	1	1	NA	NA	NA	NA	NA	NA	NA	NA	NA	NA	NA	NA	NA	NA	NA	NA	NA	NA	NA
TNFRSF13C	TNF receptor superfamily member 13C	115650	ENSG00000159958	HGNC:17755	BAFFR|CD268		22q13.2	protein-coding gene	Q96RJ3	0.9843	0.55808	0.55808	0	0	NA	NA|NA|NA	0	NA	NA|NA|NA	0	NA	NA|NA|NA	1	eQTL	0|GTEx/v8/Cells_Cultured_fibroblasts|NA	0	NA	NA|NA|NA	1	1	NA	NA	NA	NA	NA	NA	NA	NA	NA	NA	NA	NA	NA	NA	NA	NA	NA	NA	NA
TRIM50	tripartite motif containing 50	135892	ENSG00000146755	HGNC:19017	FLJ32804	TRIM50A	07q11.23	protein-coding gene	Q86XT4	0.088737	0.097259	0.088737	0	0	NA	NA|NA|NA	0	NA	NA|NA|NA	0	NA	NA|NA|NA	0	NA	NA|NA|NA	0	NA	NA|NA|NA	0	NA	NA	NA	NA	NA	NA	NA	NA	NA	NA	NA	NA	NA	NA	NA	NA	NA	NA	NA	NA
TRIQK	triple QxxK/R motif containing	286144	ENSG00000205133	HGNC:27828	DKFZp779L1068|PRO0845|LOC286144	C8orf83	08q22.1	protein-coding gene	Q629K1	0.92211	0.95159	0.92211	0	0	NA	NA|NA|NA	0	NA	NA|NA|NA	0	NA	NA|NA|NA	1	CI	0|NA|Left_Ventricle:IMR90:Mesenchymal_Stem_Cell:Mesendoderm:hESC	0	NA	NA|NA|NA	1	1	NA	NA	NA	NA	NA	NA	NA	NA	NA	NA	NA	NA	NA	NA	NA	NA	NA	NA	NA
TRMT2A	tRNA methyltransferase 2 homolog A	27037	ENSG00000099899	HGNC:24974	HTF9C		22q11.21	protein-coding gene	Q8IZ69	0.5569	0.75688	0.5569	0	0	NA	NA|NA|NA	0	NA	NA|NA|NA	0	NA	NA|NA|NA	0	NA	NA|NA|NA	0	NA	NA|NA|NA	0	NA	NA	NA	NA	NA	NA	NA	NA	NA	NA	NA	NA	NA	NA	NA	NA	NA	NA	NA	NA
TRMT61A	tRNA methyltransferase 61A	115708	ENSG00000166166	HGNC:23790	FLJ40452|GCD14|Gcd14p|hTRM61	C14orf172	14q32.33	protein-coding gene	Q96FX7	0.12096	0.027221	0.027221	0	0	NA	NA|NA|NA	0	NA	NA|NA|NA	0	NA	NA|NA|NA	0	NA	NA|NA|NA	0	NA	NA|NA|NA	0	NA	NA	1	1	NA	NA	NA	NA	NA	1	1	1	1	NA	NA	NA	NA	NA	NA	NA
TSNAXIP1	translin associated factor X interacting protein 1	55815	ENSG00000102904	HGNC:18586	TXI1		16q22.1	protein-coding gene	Q2TAA8	0.004998	0.0055418	0.004998	0	0	NA	NA|NA|NA	0	NA	NA|NA|NA	0	NA	NA|NA|NA	0	NA	NA|NA|NA	0	NA	NA|NA|NA	0	NA	NA	NA	NA	1	NA	NA	NA	NA	1	1	1	1	NA	NA	NA	NA	NA	NA	NA
TSSK2	testis specific serine kinase 2	23617	ENSG00000206203	HGNC:11401	SPOGA2|FLJ38613	STK22B	22q11.21	protein-coding gene	Q96PF2	0.27302	0.82667	0.27302	0	0	NA	NA|NA|NA	0	NA	NA|NA|NA	0	NA	NA|NA|NA	0	NA	NA|NA|NA	0	NA	NA|NA|NA	0	NA	NA	NA	NA	NA	NA	NA	NA	NA	NA	NA	NA	NA	NA	NA	NA	NA	NA	NA	NA
TUBGCP5	tubulin gamma complex associated protein 5	114791	ENSG00000275835	HGNC:18600	GCP5|KIAA1899		15q11.2	protein-coding gene	Q96RT8	0.2866	0.27035	0.27035	0	0	NA	NA|NA|NA	0	NA	NA|NA|NA	0	NA	NA|NA|NA	0	NA	NA|NA|NA	0	NA	NA|NA|NA	0	NA	NA	NA	NA	NA	NA	NA	NA	NA	NA	NA	NA	NA	NA	NA	NA	NA	NA	NA	NA
UFD1	ubiquitin recognition factor in ER associated degradation 1	7353	ENSG00000070010	HGNC:12520		UFD1L	22q11.21	protein-coding gene	Q92890	0.61257	0.88017	0.61257	0	0	NA	NA|NA|NA	0	NA	NA|NA|NA	0	NA	NA|NA|NA	0	NA	NA|NA|NA	0	NA	NA|NA|NA	0	NA	NA	NA	NA	NA	NA	NA	NA	NA	NA	NA	NA	NA	NA	NA	NA	NA	NA	NA	NA
UNC13C	unc-13 homolog C	440279	ENSG00000137766	HGNC:23149	Munc13-3|DKFZp547H074		15q21.3	protein-coding gene	Q8NB66	0.27351	0.37967	0.27351	0	0	NA	NA|NA|NA	0	NA	NA|NA|NA	0	NA	NA|NA|NA	0	NA	NA|NA|NA	0	NA	NA|NA|NA	0	NA	NA	NA	NA	NA	NA	NA	NA	NA	NA	NA	NA	NA	NA	NA	NA	NA	NA	NA	NA
VPS37B	VPS37B subunit of ESCRT-I	79720	ENSG00000139722	HGNC:25754	FLJ12750		12q24.31	protein-coding gene	Q9H9H4	0.10854	0.048606	0.048606	0	0	NA	NA|NA|NA	0	NA	NA|NA|NA	0	NA	NA|NA|NA	0	NA	NA|NA|NA	0	NA	NA|NA|NA	0	NA	1	NA	NA	NA	NA	NA	NA	NA	NA	NA	NA	NA	NA	NA	NA	NA	NA	NA	NA
VPS9D1-AS1	VPS9D1 antisense RNA 1	100128881	ENSG00000261373	HGNC:48915	MYU		16q24.3	non-coding RNA		NA	NA	NA	NA	0	NA	NA|NA|NA	0	NA	NA|NA|NA	0	NA	NA|NA|NA	0	NA	NA|NA|NA	0	NA	NA|NA|NA	0	NA	1	NA	NA	NA	NA	NA	NA	NA	NA	NA	NA	NA	NA	NA	NA	NA	NA	NA	NA
VWC2	von Willebrand factor C domain containing 2	375567	ENSG00000188730	HGNC:30200	PSST739|UNQ739		07p12.2	protein-coding gene	Q2TAL6	0.7946	0.84201	0.7946	0	0	NA	NA|NA|NA	0	NA	NA|NA|NA	0	NA	NA|NA|NA	0	NA	NA|NA|NA	0	NA	NA|NA|NA	0	NA	NA	NA	NA	NA	NA	NA	NA	NA	NA	NA	NA	NA	NA	NA	NA	NA	NA	NA	NA
WBP2NL	WBP2 N-terminal like	164684	ENSG00000183066	HGNC:28389	FLJ26145|MGC26816|PAWP|GRAMD7		22q13.2	protein-coding gene	Q6ICG8	0.10437	0.25772	0.10437	0	1	eQTL	0|PsychENCODE_eQTLs:CMC_SVA_cis|NA	1	eQTL	0|PsychENCODE_eQTLs|NA	1	eQTL	0|PsychENCODE_eQTLs|NA	1	eQTL	0|PsychENCODE_eQTLs:CMC_SVA_cis|NA	1	eQTL	0|PsychENCODE_eQTLs|NA	4	1	NA	NA	NA	NA	NA	NA	NA	NA	NA	NA	NA	NA	NA	NA	NA	NA	NA	NA	NA
WDPCP	WD repeat containing planar cell polarity effector	51057	ENSG00000143951	HGNC:28027	hFrtz|fritz|BBS15|CPLANE5	C2orf86	02p15	protein-coding gene	O95876	0.083478	0.081515	0.081515	0	0	NA	NA|NA|NA	0	NA	NA|NA|NA	0	NA	NA|NA|NA	0	NA	NA|NA|NA	0	NA	NA|NA|NA	0	NA	NA	NA	NA	NA	NA	1	1	NA	1	1	1	1	NA	NA	NA	NA	NA	NA	NA
WDSUB1	WD repeat, sterile alpha motif and U-box domain containing 1	151525	ENSG00000196151	HGNC:26697	UBOX6|FLJ36175	WDSAM1	02q24.2	protein-coding gene	Q8N9V3	0.030417	0.16771	0.030417	0	0	NA	NA|NA|NA	0	NA	NA|NA|NA	0	NA	NA|NA|NA	1	CI	0|NA|Aorta:Left_Ventricle:Liver:GM12878:IMR90:Mesenchymal_Stem_Cell:Mesendoderm:Trophoblast-like_Cell:hESC	0	NA	NA|NA|NA	1	1	NA	NA	NA	NA	NA	NA	NA	NA	NA	NA	NA	NA	NA	NA	NA	NA	NA	NA	NA
WHAMM	WASP homolog associated with actin, golgi membranes and microtubules	123720	ENSG00000156232	HGNC:30493	KIAA1971|WHAMM1	WHDC1	15q25.2	protein-coding gene	Q8TF30	0.059676	0.11366	0.059676	0	0	NA	NA|NA|NA	0	NA	NA|NA|NA	0	NA	NA|NA|NA	1	eQTL	0|eQTLGen_cis_eQTLs:GTEx/v8/Adipose_Subcutaneous:GTEx/v8/Adipose_Visceral_Omentum:GTEx/v8/Artery_Aorta|NA	1	eQTL	0|GTEx/v8/Adipose_Subcutaneous|NA	2	1	NA	NA	NA	NA	NA	NA	NA	NA	NA	NA	NA	NA	NA	NA	NA	NA	NA	NA	NA
XYLT1	xylosyltransferase 1	64131	ENSG00000103489	HGNC:15516	XT-I|PXYLT1		16p12.3	protein-coding gene	Q86Y38	0.077433	0.022936	0.022936	0	0	NA	NA|NA|NA	0	NA	NA|NA|NA	0	NA	NA|NA|NA	0	NA	NA|NA|NA	0	NA	NA|NA|NA	0	NA	NA	NA	NA	NA	NA	NA	NA	1	1	1	1	1	NA	NA	NA	NA	NA	NA	NA
YIPF7	Yip1 domain family member 7	285525	ENSG00000177752	HGNC:26825	FLJ39576|FinGER9		04p12	protein-coding gene	Q8N8F6	0.7014	0.68958	0.68958	0	0	NA	NA|NA|NA	0	NA	NA|NA|NA	0	NA	NA|NA|NA	1	CI	0|NA|Mesendoderm:hESC	0	NA	NA|NA|NA	1	1	NA	NA	NA	NA	NA	NA	NA	NA	NA	NA	NA	NA	NA	NA	NA	NA	NA	NA	NA
YJEFN3	YjeF N-terminal domain containing 3	374887	ENSG00000250067	HGNC:24785	hYjeF_N3-19p13.11|FLJ44968		19p13.11	protein-coding gene	A6XGL0	0.021709	0.026045	0.021709	0	0	NA	NA|NA|NA	0	NA	NA|NA|NA	0	NA	NA|NA|NA	0	NA	NA|NA|NA	0	NA	NA|NA|NA	0	NA	NA	NA	NA	NA	1	NA	NA	NA	1	1	1	1	NA	NA	NA	NA	NA	NA	NA
YPEL4	yippee like 4	219539	ENSG00000166793	HGNC:18328	FLJ30213		11q12.1	protein-coding gene	Q96NS1	0.8128	0.49081	0.49081	0	0	NA	NA|NA|NA	0	NA	NA|NA|NA	0	NA	NA|NA|NA	0	NA	NA|NA|NA	0	NA	NA|NA|NA	0	NA	NA	NA	NA	NA	NA	NA	NA	NA	NA	NA	NA	NA	NA	NA	NA	NA	NA	NA	NA
ZAR1	zygote arrest 1	326340	ENSG00000182223	HGNC:20436	Z3CXXC6		04p11	protein-coding gene	Q86SH2	0.023159	0.0099573	0.0099573	0	0	NA	NA|NA|NA	0	NA	NA|NA|NA	0	NA	NA|NA|NA	0	NA	NA|NA|NA	0	NA	NA|NA|NA	0	NA	NA	NA	NA	NA	NA	NA	NA	NA	NA	NA	NA	NA	1	NA	NA	NA	NA	NA	NA
ZBTB20	zinc finger and BTB domain containing 20	26137	ENSG00000181722	HGNC:13503	ODA-8S|DKFZp566F123|DPZF	ZNF288	03q13.31	protein-coding gene	Q9HC78	0.069071	0.077463	0.069071	0	0	NA	NA|NA|NA	0	NA	NA|NA|NA	0	NA	NA|NA|NA	0	NA	NA|NA|NA	0	NA	NA|NA|NA	0	NA	NA	NA	NA	NA	NA	NA	NA	NA	NA	NA	NA	NA	NA	NA	NA	NA	NA	NA	NA
ZC2HC1C	zinc finger C2HC-type containing 1C	79696	ENSG00000119703	HGNC:20354		C14orf140|FAM164C	14q24.3	protein-coding gene	Q53FD0	0.010735	0.0080063	0.0080063	0	0	NA	NA|NA|NA	0	NA	NA|NA|NA	0	NA	NA|NA|NA	0	NA	NA|NA|NA	0	NA	NA|NA|NA	0	NA	1	NA	NA	NA	NA	NA	NA	NA	NA	NA	NA	NA	NA	NA	NA	NA	NA	NA	NA
ZCRB1	zinc finger CCHC-type and RNA binding motif containing 1	85437	ENSG00000139168	HGNC:29620	MADP-1|MADP1|RBM36|ZCCHC19|SNRNP31		12q12	protein-coding gene	Q8TBF4	0.084152	0.16029	0.084152	0	0	NA	NA|NA|NA	0	NA	NA|NA|NA	0	NA	NA|NA|NA	0	NA	NA|NA|NA	0	NA	NA|NA|NA	0	NA	1	NA	NA	NA	NA	NA	NA	NA	NA	NA	NA	NA	NA	NA	NA	NA	NA	NA	NA
ZFAND6	zinc finger AN1-type containing 6	54469	ENSG00000086666	HGNC:30164	ZFAND5B|AWP1	ZA20D3	15q25.1	protein-coding gene	Q6FIF0	0.26594	0.64586	0.26594	0	0	NA	NA|NA|NA	0	NA	NA|NA|NA	0	NA	NA|NA|NA	1	CI	0|NA|IMR90:Mesenchymal_Stem_Cell	0	NA	NA|NA|NA	1	1	NA	NA	NA	NA	NA	NA	NA	NA	NA	NA	NA	NA	NA	NA	NA	NA	NA	NA	NA
ZNF169	zinc finger protein 169	169841	ENSG00000175787	HGNC:12957	MGC51961		09q22.32	protein-coding gene	Q14929	0.56649	0.21509	0.21509	0	0	NA	NA|NA|NA	0	NA	NA|NA|NA	0	NA	NA|NA|NA	0	NA	NA|NA|NA	0	NA	NA|NA|NA	0	NA	1	NA	NA	NA	NA	NA	NA	NA	NA	NA	NA	NA	NA	NA	NA	NA	NA	NA	NA
ZNF260	zinc finger protein 260	339324	ENSG00000254004	HGNC:13499	ozrf1|Zfp260		19q13.12	protein-coding gene	Q3ZCT1	0.0067045	0.0014379	0.0014379	0	0	NA	NA|NA|NA	0	NA	NA|NA|NA	0	NA	NA|NA|NA	0	NA	NA|NA|NA	0	NA	NA|NA|NA	0	NA	1	NA	NA	NA	NA	NA	NA	NA	NA	NA	NA	NA	NA	NA	NA	NA	NA	NA	NA
ZNF33B	zinc finger protein 33B	7582	ENSG00000196693	HGNC:13097	KOX31|KOX2	ZNF11B	10q11.21	protein-coding gene	Q06732	0.0053584	0.0072565	0.0053584	0	1	Positional,eQTL	5|PsychENCODE_eQTLs|NA	0	NA	NA|NA|NA	0	NA	NA|NA|NA	1	Positional,eQTL	5|PsychENCODE_eQTLs:eQTLGen_cis_eQTLs:GTEx/v8/Adipose_Subcutaneous:GTEx/v8/Adipose_Visceral_Omentum:GTEx/v8/Whole_Blood:GTEx/v8/Artery_Tibial:GTEx/v8/Esophagus_Gastroesophageal_Junction:GTEx/v8/Heart_Left_Ventricle|Mesenchymal_Stem_Cell:Mesendoderm	0	NA	NA|NA|NA	2	1	NA	NA	NA	NA	NA	NA	NA	NA	NA	NA	NA	NA	NA	NA	NA	NA	NA	NA	NA
ZNF385D	zinc finger protein 385D	79750	ENSG00000151789	HGNC:26191	FLJ22419	ZNF659	03p24.3	protein-coding gene	Q9H6B1	0.4061	0.25249	0.25249	0	0	NA	NA|NA|NA	0	NA	NA|NA|NA	0	NA	NA|NA|NA	0	NA	NA|NA|NA	0	NA	NA|NA|NA	0	NA	NA	NA	NA	NA	NA	NA	NA	NA	NA	NA	NA	NA	NA	NA	NA	NA	NA	NA	NA
ZNF461	zinc finger protein 461	92283	ENSG00000197808	HGNC:21629	GIOT-1|MGC33911		19q13.13	protein-coding gene	Q8TAF7	0.0019322	0.0014013	0.0014013	0	0	NA	NA|NA|NA	0	NA	NA|NA|NA	0	NA	NA|NA|NA	0	NA	NA|NA|NA	0	NA	NA|NA|NA	0	NA	NA	NA	NA	NA	NA	NA	NA	NA	NA	NA	NA	NA	1	NA	NA	NA	NA	NA	NA
ZNF485	zinc finger protein 485	220992	ENSG00000198298	HGNC:23440			10q11.21	protein-coding gene	Q8NCK3	0.64937	0.37008	0.37008	0	0	NA	NA|NA|NA	0	NA	NA|NA|NA	0	NA	NA|NA|NA	1	CI	0|NA|Mesenchymal_Stem_Cell	0	NA	NA|NA|NA	1	1	NA	NA	NA	NA	NA	NA	NA	NA	NA	NA	NA	NA	NA	NA	NA	NA	NA	NA	NA
ZNF518B	zinc finger protein 518B	85460	ENSG00000178163	HGNC:29365	KIAA1729		04p16.1	protein-coding gene	Q9C0D4	0.081802	0.32495	0.081802	0	0	NA	NA|NA|NA	0	NA	NA|NA|NA	0	NA	NA|NA|NA	0	NA	NA|NA|NA	0	NA	NA|NA|NA	0	NA	NA	NA	NA	1	NA	NA	NA	NA	1	1	1	1	NA	NA	NA	NA	NA	NA	NA
ZNF557	zinc finger protein 557	79230	ENSG00000130544	HGNC:28632	MGC4054		19p13.2	protein-coding gene	Q8N988	0.79708	0.87491	0.79708	0	0	NA	NA|NA|NA	0	NA	NA|NA|NA	0	NA	NA|NA|NA	0	NA	NA|NA|NA	0	NA	NA|NA|NA	0	NA	NA	NA	NA	NA	NA	NA	NA	NA	NA	NA	NA	NA	NA	NA	NA	NA	NA	NA	NA
ZNF560	zinc finger protein 560	147741	ENSG00000198028	HGNC:26484	FLJ31986		19p13.2	protein-coding gene	Q96MR9	0.85225	0.8836	0.85225	0	0	NA	NA|NA|NA	0	NA	NA|NA|NA	0	NA	NA|NA|NA	0	NA	NA|NA|NA	0	NA	NA|NA|NA	0	NA	NA	NA	NA	NA	NA	NA	NA	NA	NA	NA	NA	NA	NA	NA	NA	NA	NA	NA	NA
ZNF567	zinc finger protein 567	163081	ENSG00000189042	HGNC:28696	MGC45586		19q13.12	protein-coding gene	Q8N184	0.00095484	0.0030047	0.00095484	1	0	NA	NA|NA|NA	0	NA	NA|NA|NA	0	NA	NA|NA|NA	0	NA	NA|NA|NA	0	NA	NA|NA|NA	0	NA	NA	NA	NA	NA	NA	NA	NA	NA	NA	NA	NA	NA	NA	NA	NA	NA	NA	NA	NA
ZNF568	zinc finger protein 568	374900	ENSG00000198453	HGNC:25392	DKFZp686B0797		19q13.12	protein-coding gene	Q3ZCX4	0.02014	0.031457	0.02014	0	0	NA	NA|NA|NA	0	NA	NA|NA|NA	0	NA	NA|NA|NA	0	NA	NA|NA|NA	0	NA	NA|NA|NA	0	NA	1	NA	NA	NA	NA	NA	NA	NA	NA	NA	NA	NA	NA	NA	NA	NA	NA	NA	NA
ZNF581	zinc finger protein 581	51545	ENSG00000171425	HGNC:25017	HSPC189|FLJ22550		19q13.42	protein-coding gene	Q9P0T4	0.78281	0.27186	0.27186	0	0	NA	NA|NA|NA	0	NA	NA|NA|NA	0	NA	NA|NA|NA	0	NA	NA|NA|NA	0	NA	NA|NA|NA	0	NA	1	NA	NA	NA	NA	NA	NA	NA	NA	NA	NA	NA	NA	NA	NA	NA	NA	NA	NA
ZNF613	zinc finger protein 613	79898	ENSG00000176024	HGNC:25827	FLJ13590		19q13.41	protein-coding gene	Q6PF04	0.1198	0.18488	0.1198	0	1	Positional	2|NA|NA	0	NA	NA|NA|NA	0	NA	NA|NA|NA	1	Positional,eQTL	2|eQTLcatalogue/BLUEPRINT_ge_neutrophil:eQTLcatalogue/CEDAR_neutrophil_CD15:eQTLcatalogue/Fairfax_2014_IFN24:eQTLGen_cis_eQTLs:BIOSQTL/BIOS_eQTL_geneLevel:GTEx/v8/Adipose_Subcutaneous:GTEx/v8/Whole_Blood:GTEx/v8/Artery_Tibial:GTEx/v8/Esophagus_Gastroesophageal_Junction:GTEx/v8/Nerve_Tibial:GTEx/v8/Skin_Sun_Exposed_Lower_leg|NA	0	NA	NA|NA|NA	2	1	NA	NA	NA	NA	NA	NA	NA	NA	NA	NA	NA	NA	NA	NA	NA	NA	NA	NA	NA
ZNF681	zinc finger protein 681	148213	ENSG00000196172	HGNC:26457	FLJ31526		19p12	protein-coding gene	Q96N22	0.54584	0.65978	0.54584	0	0	NA	NA|NA|NA	0	NA	NA|NA|NA	0	NA	NA|NA|NA	0	NA	NA|NA|NA	0	NA	NA|NA|NA	0	NA	NA	NA	NA	NA	NA	NA	NA	NA	NA	NA	NA	NA	NA	NA	NA	NA	NA	NA	NA
ZNF799	zinc finger protein 799	90576	ENSG00000196466	HGNC:28071	HIT-40|MGC71805	ZNF842	19p13.2	protein-coding gene	Q96GE5	0.13315	0.074133	0.074133	0	0	NA	NA|NA|NA	0	NA	NA|NA|NA	0	NA	NA|NA|NA	0	NA	NA|NA|NA	0	NA	NA|NA|NA	0	NA	NA	NA	NA	NA	NA	NA	NA	NA	NA	NA	NA	NA	NA	NA	NA	NA	0	1	NA
ZNF83	zinc finger protein 83	55769	ENSG00000167766	HGNC:13158	FLJ11015|HPF1	ZNF816B	19q13.41	protein-coding gene	P51522	0.36021	0.67152	0.36021	0	1	eQTL	0|CMC_SVA_cis|NA	0	NA	NA|NA|NA	0	NA	NA|NA|NA	1	eQTL	0|CMC_SVA_cis|NA	0	NA	NA|NA|NA	2	1	NA	NA	NA	NA	NA	NA	NA	NA	NA	NA	NA	NA	NA	NA	NA	NA	NA	NA	NA
ADAM10	ADAM metallopeptidase domain 10	102	ENSG00000137845	HGNC:188	kuz|MADM|HsT18717|CD156C		15q21.3	protein-coding gene	O14672	0.70429	0.8097	0.70429	0	0	NA	NA|NA|NA	0	NA	NA|NA|NA	0	NA	NA|NA|NA	0	NA	NA|NA|NA	0	NA	NA|NA|NA	0	NA	NA	NA	NA	NA	NA	NA	NA	NA	NA	NA	NA	NA	NA	NA	NA	NA	NA	NA	NA
ADGRL1	adhesion G protein-coupled receptor L1	22859	ENSG00000072071	HGNC:20973	KIAA0821|CIRL1|LEC2	LPHN1	19p13.12	protein-coding gene	O94910	0.31959	0.61824	0.31959	0	0	NA	NA|NA|NA	0	NA	NA|NA|NA	0	NA	NA|NA|NA	0	NA	NA|NA|NA	0	NA	NA|NA|NA	0	NA	NA	NA	NA	NA	NA	NA	NA	NA	NA	NA	NA	NA	NA	NA	NA	NA	NA	NA	NA
ANXA1	annexin A1	301	ENSG00000135046	HGNC:533		ANX1|LPC1	09q21.13	protein-coding gene	P04083	0.029149	0.33141	0.029149	0	0	NA	NA|NA|NA	0	NA	NA|NA|NA	0	NA	NA|NA|NA	0	NA	NA|NA|NA	0	NA	NA|NA|NA	0	NA	NA	NA	NA	NA	NA	NA	NA	NA	NA	NA	NA	NA	NA	NA	NA	NA	NA	NA	NA
CRH	corticotropin releasing hormone	1392	ENSG00000147571	HGNC:2355	CRF|CRH1		08q13.1	protein-coding gene	P06850	0.064005	0.003502	0.003502	0	0	NA	NA|NA|NA	0	NA	NA|NA|NA	0	NA	NA|NA|NA	0	NA	NA|NA|NA	0	NA	NA|NA|NA	0	NA	NA	NA	NA	NA	NA	NA	NA	NA	NA	NA	NA	NA	NA	NA	NA	NA	NA	NA	NA
CX3CR1	C-X3-C motif chemokine receptor 1	1524	ENSG00000168329	HGNC:2558	CMKDR1|V28|CCRL1	GPR13|CMKBRL1	03p22.2	protein-coding gene	P49238	0.61265	0.72524	0.61265	0	0	NA	NA|NA|NA	0	NA	NA|NA|NA	0	NA	NA|NA|NA	0	NA	NA|NA|NA	0	NA	NA|NA|NA	0	NA	NA	NA	NA	NA	NA	NA	NA	NA	NA	NA	NA	NA	NA	NA	NA	NA	NA	NA	NA
DEPDC5	DEP domain containing 5, GATOR1 subcomplex subunit	9681	ENSG00000100150	HGNC:18423	KIAA0645|DEP.5		22q12.2-q12.3	protein-coding gene	O75140	0.57823	0.6603	0.57823	0	0	NA	NA|NA|NA	0	NA	NA|NA|NA	0	NA	NA|NA|NA	0	NA	NA|NA|NA	0	NA	NA|NA|NA	0	NA	NA	NA	NA	NA	NA	NA	NA	NA	NA	NA	NA	NA	NA	NA	NA	NA	NA	NA	NA
FABP3	fatty acid binding protein 3	2170	ENSG00000121769	HGNC:3557	H-FABP|O-FABP	MDGI|FABP11	01p35.2	protein-coding gene	P05413	0.36594	0.8203	0.36594	0	0	NA	NA|NA|NA	0	NA	NA|NA|NA	0	NA	NA|NA|NA	0	NA	NA|NA|NA	0	NA	NA|NA|NA	0	NA	NA	NA	NA	NA	NA	NA	NA	NA	NA	NA	NA	NA	NA	NA	NA	NA	NA	NA	NA
FLT3LG	fms related receptor tyrosine kinase 3 ligand	2323	ENSG00000090554	HGNC:3766			19q13.33	protein-coding gene	P49771	0.74527	0.30162	0.30162	0	0	NA	NA|NA|NA	0	NA	NA|NA|NA	0	NA	NA|NA|NA	0	NA	NA|NA|NA	0	NA	NA|NA|NA	0	NA	NA	NA	NA	NA	NA	NA	NA	NA	NA	NA	NA	NA	NA	NA	NA	NA	NA	NA	NA
FOXP2	forkhead box P2	93986	ENSG00000128573	HGNC:13875	CAGH44	TNRC10|SPCH1	07q31.1	protein-coding gene	O15409	0.49003	0.036024	0.036024	0	0	NA	NA|NA|NA	0	NA	NA|NA|NA	0	NA	NA|NA|NA	0	NA	NA|NA|NA	0	NA	NA|NA|NA	0	NA	NA	NA	NA	NA	NA	NA	NA	NA	NA	NA	NA	NA	NA	NA	NA	NA	NA	NA	NA
GRIN1	glutamate ionotropic receptor NMDA type subunit 1	2902	ENSG00000176884	HGNC:4584	GluN1	NMDAR1	09q34.3	protein-coding gene	Q05586	0.20679	0.012985	0.012985	0	0	NA	NA|NA|NA	0	NA	NA|NA|NA	0	NA	NA|NA|NA	0	NA	NA|NA|NA	0	NA	NA|NA|NA	0	NA	NA	NA	NA	NA	NA	NA	NA	NA	NA	NA	NA	NA	NA	NA	NA	NA	NA	NA	NA
GRIN2B	glutamate ionotropic receptor NMDA type subunit 2B	2904	ENSG00000273079	HGNC:4586	GluN2B	NMDAR2B	12p13.1	protein-coding gene	Q13224	0.81174	0.43545	0.43545	0	0	NA	NA|NA|NA	0	NA	NA|NA|NA	0	NA	NA|NA|NA	0	NA	NA|NA|NA	0	NA	NA|NA|NA	0	NA	NA	NA	NA	NA	NA	NA	NA	NA	NA	NA	NA	NA	NA	NA	NA	NA	NA	NA	NA
GRIN3A	glutamate ionotropic receptor NMDA type subunit 3A	116443	ENSG00000198785	HGNC:16767	GluN3A		09q31.1	protein-coding gene	Q8TCU5	0.23541	0.25685	0.23541	0	0	NA	NA|NA|NA	0	NA	NA|NA|NA	0	NA	NA|NA|NA	0	NA	NA|NA|NA	0	NA	NA|NA|NA	0	NA	NA	NA	NA	NA	NA	NA	NA	NA	NA	NA	NA	NA	NA	NA	NA	NA	NA	NA	NA
HNMT	histamine N-methyltransferase	3176	ENSG00000150540	HGNC:5028			02q22.1	protein-coding gene	P50135	0.91452	0.21354	0.21354	0	0	NA	NA|NA|NA	0	NA	NA|NA|NA	0	NA	NA|NA|NA	0	NA	NA|NA|NA	0	NA	NA|NA|NA	0	NA	NA	NA	NA	NA	NA	NA	NA	NA	NA	NA	NA	NA	NA	NA	NA	NA	NA	NA	NA
IL17A	interleukin 17A	3605	ENSG00000112115	HGNC:5981	IL-17A|IL-17	CTLA8|IL17	06p12.2	protein-coding gene	Q16552	0.61552	0.15925	0.15925	0	0	NA	NA|NA|NA	0	NA	NA|NA|NA	0	NA	NA|NA|NA	0	NA	NA|NA|NA	0	NA	NA|NA|NA	0	NA	NA	NA	NA	NA	NA	NA	NA	NA	NA	NA	NA	NA	NA	NA	NA	NA	NA	NA	NA
IL17RA	interleukin 17 receptor A	23765		HGNC:5985				protein-coding gene				NA	NA	NA	NA	NA	NA	NA	NA	NA	NA	NA	NA	NA	NA	NA	NA	NA	NA	NA	NA								NA	NA	NA	NA	NA
ITGA4	integrin subunit alpha 4	3676	ENSG00000115232	HGNC:6140	CD49d	CD49D	02q31.3	protein-coding gene	P13612	0.76004	0.70449	0.70449	0	0	NA	NA|NA|NA	0	NA	NA|NA|NA	0	NA	NA|NA|NA	0	NA	NA|NA|NA	0	NA	NA|NA|NA	0	NA	NA	NA	NA	NA	NA	NA	NA	NA	NA	NA	NA	NA	NA	NA	NA	NA	NA	NA	NA
ITGB1	integrin subunit beta 1	3688	ENSG00000150093	HGNC:6153	CD29|GPIIA	FNRB|MSK12|MDF2	10p11.22	protein-coding gene	P05556	0.62977	0.77143	0.62977	0	0	NA	NA|NA|NA	0	NA	NA|NA|NA	0	NA	NA|NA|NA	0	NA	NA|NA|NA	0	NA	NA|NA|NA	0	NA	NA	NA	NA	NA	NA	NA	NA	NA	NA	NA	NA	NA	NA	NA	NA	NA	NA	NA	NA
LRP8	LDL receptor related protein 8	7804	ENSG00000157193	HGNC:6700	APOER2|MCI1|LRP-8|HSZ75190		01p32.3	protein-coding gene	Q14114	0.063035	0.10067	0.063035	0	0	NA	NA|NA|NA	0	NA	NA|NA|NA	0	NA	NA|NA|NA	0	NA	NA|NA|NA	0	NA	NA|NA|NA	0	NA	NA	NA	NA	NA	NA	NA	NA	NA	NA	NA	NA	NA	NA	NA	NA	NA	NA	NA	NA
MICU1	mitochondrial calcium uptake 1	10367	ENSG00000107745	HGNC:1530	CALC|EFHA3|FLJ12684	CBARA1	10q22.1	protein-coding gene	Q9BPX6	0.85481	0.56082	0.56082	0	0	NA	NA|NA|NA	0	NA	NA|NA|NA	0	NA	NA|NA|NA	0	NA	NA|NA|NA	0	NA	NA|NA|NA	0	NA	NA	NA	NA	NA	NA	NA	NA	NA	NA	NA	NA	NA	NA	NA	NA	NA	NA	NA	NA
NUS1	NUS1 dehydrodolichyl diphosphate synthase subunit	116150	ENSG00000153989	HGNC:21042	MGC7199|NgBR|TANGO14	C6orf68	06q22.1	protein-coding gene	Q96E22	0.093923	0.49384	0.093923	0	0	NA	NA|NA|NA	0	NA	NA|NA|NA	0	NA	NA|NA|NA	0	NA	NA|NA|NA	0	NA	NA|NA|NA	0	NA	NA	NA	NA	NA	NA	NA	NA	NA	NA	NA	NA	NA	NA	NA	NA	NA	NA	NA	NA
PROK2	prokineticin 2	60675	ENSG00000163421	HGNC:18455	PK2|BV8|MIT1|KAL4		03p13	protein-coding gene	Q9HC23	0.9712	0.26468	0.26468	0	0	NA	NA|NA|NA	0	NA	NA|NA|NA	0	NA	NA|NA|NA	0	NA	NA|NA|NA	0	NA	NA|NA|NA	0	NA	NA	NA	NA	NA	NA	NA	NA	NA	NA	NA	NA	NA	NA	NA	NA	NA	NA	NA	NA
RHOA	ras homolog family member A	387	ENSG00000067560	HGNC:667	Rho12|RHOH12	ARH12|ARHA	03p21.31	protein-coding gene	P61586	0.045861	0.021528	0.021528	0	0	NA	NA|NA|NA	0	NA	NA|NA|NA	0	NA	NA|NA|NA	0	NA	NA|NA|NA	0	NA	NA|NA|NA	0	NA	NA	NA	NA	NA	NA	NA	NA	NA	NA	NA	NA	NA	NA	NA	NA	NA	NA	NA	NA
RIMKLA	ribosomal modification protein rimK like family member A	284716	ENSG00000177181	HGNC:28725	MGC47816|RP11-157D18.1|NAAGS-II	FAM80A	01p34.2	protein-coding gene	Q8IXN7	0.094297	0.23426	0.094297	0	0	NA	NA|NA|NA	0	NA	NA|NA|NA	0	NA	NA|NA|NA	0	NA	NA|NA|NA	0	NA	NA|NA|NA	0	NA	NA	NA	NA	NA	NA	NA	NA	NA	NA	NA	NA	NA	NA	NA	NA	NA	NA	NA	NA
RIMKLB	ribosomal modification protein rimK like family member B	57494	ENSG00000166532	HGNC:29228	KIAA1238|NAAGS|NAAGS-I	FAM80B	12p13.31	protein-coding gene	Q9ULI2	0.42786	0.058622	0.058622	0	0	NA	NA|NA|NA	0	NA	NA|NA|NA	0	NA	NA|NA|NA	0	NA	NA|NA|NA	0	NA	NA|NA|NA	0	NA	NA	NA	NA	NA	NA	NA	NA	NA	NA	NA	NA	NA	NA	NA	NA	NA	NA	NA	NA
SELPLG	selectin P ligand	6404	ENSG00000110876	HGNC:10722	PSGL-1|CD162		12q24.11	protein-coding gene	Q14242	0.50807	0.73331	0.50807	0	0	NA	NA|NA|NA	0	NA	NA|NA|NA	0	NA	NA|NA|NA	0	NA	NA|NA|NA	0	NA	NA|NA|NA	0	NA	NA	NA	NA	NA	NA	NA	NA	NA	NA	NA	NA	NA	NA	NA	NA	NA	NA	NA	NA
SLC16A2	solute carrier family 16 member 2	6567	ENSG00000147100	HGNC:10923	XPCT|MCT8|MCT7	DXS128|AHDS|MRX22	Xq13.2	protein-coding gene	P36021	NA	NA	NA	NA	0	NA	NA|NA|NA	0	NA	NA|NA|NA	0	NA	NA|NA|NA	0	NA	NA|NA|NA	0	NA	NA|NA|NA	0	NA	NA	NA	NA	NA	NA	NA	NA	NA	NA	NA	NA	NA	NA	NA	NA	NA	NA	NA	NA
SLC22A3	solute carrier family 22 member 3	6581	ENSG00000146477	HGNC:10967	OCT3|EMT		06q25.3	protein-coding gene	O75751	0.73217	0.88176	0.73217	0	0	NA	NA|NA|NA	0	NA	NA|NA|NA	0	NA	NA|NA|NA	0	NA	NA|NA|NA	0	NA	NA|NA|NA	0	NA	NA	NA	NA	NA	NA	NA	NA	NA	NA	NA	NA	NA	NA	NA	NA	NA	NA	NA	NA
TBK1	TANK binding kinase 1	29110	ENSG00000183735	HGNC:11584	NAK		12q14.2	protein-coding gene	Q9UHD2	0.75073	0.61098	0.61098	0	0	NA	NA|NA|NA	0	NA	NA|NA|NA	0	NA	NA|NA|NA	0	NA	NA|NA|NA	0	NA	NA|NA|NA	0	NA	NA	NA	NA	NA	NA	NA	NA	NA	NA	NA	NA	NA	NA	NA	NA	NA	NA	NA	NA
TGFB1	transforming growth factor beta 1	7040	ENSG00000105329	HGNC:11766	CED|TGFbeta	TGFB|DPD1	19q13.2	protein-coding gene	P01137	0.1319	0.68926	0.1319	0	0	NA	NA|NA|NA	0	NA	NA|NA|NA	0	NA	NA|NA|NA	0	NA	NA|NA|NA	0	NA	NA|NA|NA	0	NA	NA	NA	NA	NA	NA	NA	NA	NA	NA	NA	NA	NA	NA	NA	NA	NA	NA	NA	NA
TGFB3	transforming growth factor beta 3	7043	ENSG00000119699	HGNC:11769		ARVD1|ARVD	14q24.3	protein-coding gene	P10600	0.53718	0.47831	0.47831	0	0	NA	NA|NA|NA	0	NA	NA|NA|NA	0	NA	NA|NA|NA	0	NA	NA|NA|NA	0	NA	NA|NA|NA	0	NA	NA	NA	NA	NA	NA	NA	NA	NA	NA	NA	NA	NA	NA	NA	NA	NA	NA	NA	NA
TNFRSF1A	TNF receptor superfamily member 1A	7132	ENSG00000067182	HGNC:11916	TNF-R|TNFAR|TNFR60|TNF-R-I|CD120a|TNF-R55	TNFR1	12p13.31	protein-coding gene	P19438	0.46522	0.47201	0.46522	0	0	NA	NA|NA|NA	0	NA	NA|NA|NA	0	NA	NA|NA|NA	0	NA	NA|NA|NA	0	NA	NA|NA|NA	0	NA	NA	NA	NA	NA	NA	NA	NA	NA	NA	NA	NA	NA	NA	NA	NA	NA	NA	NA	NA
TNFRSF1B	TNF receptor superfamily member 1B	7133	ENSG00000028137	HGNC:11917	TNFBR|TNFR80|TNF-R75|TNF-R-II|p75|CD120b	TNFR2	01p36.22	protein-coding gene	P20333	0.09402	0.013861	0.013861	0	0	NA	NA|NA|NA	0	NA	NA|NA|NA	0	NA	NA|NA|NA	0	NA	NA|NA|NA	0	NA	NA|NA|NA	0	NA	NA	NA	NA	NA	NA	NA	NA	NA	NA	NA	NA	NA	NA	NA	NA	NA	NA	NA	NA
A1CF	APOBEC1 complementation factor	29974	ENSG00000148584	HGNC:24086	ACF|ASP|ACF64|ACF65|APOBEC1CF		10q11.23	protein-coding gene	Q9NQ94	0.51373	0.61789	0.51373	0	0	NA	NA|NA|NA	0	NA	NA|NA|NA	0	NA	NA|NA|NA	0	NA	NA|NA|NA	0	NA	NA|NA|NA	0	NA	NA	NA	NA	NA	NA	NA	NA	NA	NA	NA	NA	NA	NA	NA	NA	NA	NA	NA	NA
A2M	alpha-2-macroglobulin	2	ENSG00000175899	HGNC:7	FWP007|S863-7|CPAMD5		12p13.31	protein-coding gene	P01023	0.61744	0.5564	0.5564	0	0	NA	NA|NA|NA	0	NA	NA|NA|NA	0	NA	NA|NA|NA	0	NA	NA|NA|NA	0	NA	NA|NA|NA	0	NA	NA	NA	NA	NA	NA	NA	NA	NA	NA	NA	NA	NA	NA	NA	NA	NA	NA	NA	NA
A2ML1	alpha-2-macroglobulin like 1	144568	ENSG00000166535	HGNC:23336	FLJ25179|p170	CPAMD9	12p13.31	protein-coding gene	A8K2U0	0.10518	0.024473	0.024473	0	0	NA	NA|NA|NA	0	NA	NA|NA|NA	0	NA	NA|NA|NA	0	NA	NA|NA|NA	0	NA	NA|NA|NA	0	NA	NA	NA	NA	NA	NA	NA	NA	NA	NA	NA	NA	NA	NA	NA	NA	NA	NA	NA	NA
A4GALT	alpha 1,4-galactosyltransferase (P blood group)	53947	ENSG00000128274	HGNC:18149	A14GALT|Gb3S|P(k)	P1	22q13.2	protein-coding gene	Q9NPC4	0.21966	0.31252	0.21966	0	0	NA	NA|NA|NA	0	NA	NA|NA|NA	0	NA	NA|NA|NA	0	NA	NA|NA|NA	0	NA	NA|NA|NA	0	NA	NA	NA	NA	NA	NA	NA	NA	NA	NA	NA	NA	NA	NA	NA	NA	NA	NA	NA	NA
A4GNT	alpha-1,4-N-acetylglucosaminyltransferase	51146	ENSG00000118017	HGNC:17968	alpha4GnT		03q22.3	protein-coding gene	Q9UNA3	0.11318	0.0052382	0.0052382	0	0	NA	NA|NA|NA	0	NA	NA|NA|NA	0	NA	NA|NA|NA	0	NA	NA|NA|NA	0	NA	NA|NA|NA	0	NA	NA	NA	NA	NA	NA	NA	NA	NA	NA	NA	NA	NA	NA	NA	NA	NA	NA	NA	NA
AACSP1	acetoacetyl-CoA synthetase pseudogene 1	729522	ENSG00000250420	HGNC:18226		AACSL	05q35.3	pseudogene		NA	NA	NA	NA	0	NA	NA|NA|NA	0	NA	NA|NA|NA	0	NA	NA|NA|NA	0	NA	NA|NA|NA	0	NA	NA|NA|NA	0	NA	NA	NA	NA	NA	NA	NA	NA	NA	NA	NA	NA	NA	NA	NA	NA	NA	NA	NA	NA
AADACL2	arylacetamide deacetylase like 2	344752	ENSG00000197953	HGNC:24427	MGC72001		03q25.1	protein-coding gene	Q6P093	0.27182	0.18845	0.18845	0	0	NA	NA|NA|NA	0	NA	NA|NA|NA	0	NA	NA|NA|NA	0	NA	NA|NA|NA	0	NA	NA|NA|NA	0	NA	NA	NA	NA	NA	NA	NA	NA	NA	NA	NA	NA	NA	NA	NA	NA	NA	NA	NA	NA
AAK1	AP2 associated kinase 1	22848	ENSG00000115977	HGNC:19679	KIAA1048|DKFZp686K16132		02p13.3	protein-coding gene	Q2M2I8	0.097572	0.10594	0.097572	0	0	NA	NA|NA|NA	0	NA	NA|NA|NA	0	NA	NA|NA|NA	0	NA	NA|NA|NA	0	NA	NA|NA|NA	0	NA	NA	NA	NA	NA	NA	NA	NA	NA	NA	NA	NA	NA	NA	NA	NA	NA	NA	NA	NA
AAMP	angio associated migratory cell protein	14	ENSG00000127837	HGNC:18			02q35	protein-coding gene	Q13685	0.41324	0.79261	0.41324	0	0	NA	NA|NA|NA	0	NA	NA|NA|NA	0	NA	NA|NA|NA	0	NA	NA|NA|NA	0	NA	NA|NA|NA	0	NA	NA	NA	NA	NA	NA	NA	NA	NA	NA	NA	NA	NA	NA	NA	NA	NA	NA	NA	NA
AARS1	alanyl-tRNA synthetase 1	16	ENSG00000090861	HGNC:20	CMT2N|AlaRS	AARS	16q22.1	protein-coding gene	P49588	0.13778	0.1249	0.1249	0	0	NA	NA|NA|NA	0	NA	NA|NA|NA	0	NA	NA|NA|NA	0	NA	NA|NA|NA	0	NA	NA|NA|NA	0	NA	NA	NA	NA	NA	NA	NA	NA	NA	NA	NA	NA	NA	NA	NA	NA	NA	NA	NA	NA
AARS2	alanyl-tRNA synthetase 2, mitochondrial	57505	ENSG00000124608	HGNC:21022	KIAA1270|bA444E17.1	AARSL	06p21.1	protein-coding gene	Q5JTZ9	0.18979	0.40133	0.18979	0	0	NA	NA|NA|NA	0	NA	NA|NA|NA	0	NA	NA|NA|NA	0	NA	NA|NA|NA	0	NA	NA|NA|NA	0	NA	NA	NA	NA	NA	NA	NA	NA	NA	NA	NA	NA	NA	NA	NA	NA	NA	NA	NA	NA
AARSD1	alanyl-tRNA synthetase domain containing 1	80755	ENSG00000266967	HGNC:28417	MGC2744|AlaXp		17q21.31	protein-coding gene	Q9BTE6	0.64652	0.68334	0.64652	0	0	NA	NA|NA|NA	0	NA	NA|NA|NA	0	NA	NA|NA|NA	0	NA	NA|NA|NA	0	NA	NA|NA|NA	0	NA	NA	NA	NA	NA	NA	NA	NA	NA	NA	NA	NA	NA	NA	NA	NA	NA	NA	NA	NA
AASDH	aminoadipate-semialdehyde dehydrogenase	132949	ENSG00000157426	HGNC:23993	NRPS998|LYS2|ACSF4		04q12	protein-coding gene	Q4L235	0.98743	0.7245	0.7245	0	0	NA	NA|NA|NA	0	NA	NA|NA|NA	0	NA	NA|NA|NA	0	NA	NA|NA|NA	0	NA	NA|NA|NA	0	NA	NA	NA	NA	NA	NA	NA	NA	NA	NA	NA	NA	NA	NA	NA	NA	NA	NA	NA	NA
AATF	apoptosis antagonizing transcription factor	26574	ENSG00000275700	HGNC:19235	DED|CHE-1|CHE1|BFR2		17q12	protein-coding gene	Q9NY61	0.21546	0.38395	0.21546	0	0	NA	NA|NA|NA	0	NA	NA|NA|NA	0	NA	NA|NA|NA	0	NA	NA|NA|NA	0	NA	NA|NA|NA	0	NA	NA	NA	NA	NA	NA	NA	NA	NA	NA	NA	NA	NA	NA	NA	NA	NA	NA	NA	NA
AATK	apoptosis associated tyrosine kinase	9625	ENSG00000181409	HGNC:21	AATYK|KIAA0641|LMTK1|LMR1|AATYK1|PPP1R77		17q25.3	protein-coding gene	Q6ZMQ8	0.74486	0.040423	0.040423	0	0	NA	NA|NA|NA	0	NA	NA|NA|NA	0	NA	NA|NA|NA	0	NA	NA|NA|NA	0	NA	NA|NA|NA	0	NA	NA	NA	NA	NA	NA	NA	NA	NA	NA	NA	NA	NA	NA	NA	NA	NA	NA	NA	NA
ABCA1	ATP binding cassette subfamily A member 1	19	ENSG00000165029	HGNC:29	TGD	ABC1|HDLDT1	09q31.1	protein-coding gene	O95477	0.48326	0.51361	0.48326	0	0	NA	NA|NA|NA	0	NA	NA|NA|NA	0	NA	NA|NA|NA	0	NA	NA|NA|NA	0	NA	NA|NA|NA	0	NA	NA	NA	NA	NA	NA	NA	NA	NA	NA	NA	NA	NA	NA	NA	NA	NA	NA	NA	NA
ABCA12	ATP binding cassette subfamily A member 12	26154	ENSG00000144452	HGNC:14637	DKFZP434G232|LI2	ICR2B	02q35	protein-coding gene	Q86UK0	0.21774	0.24693	0.21774	0	0	NA	NA|NA|NA	0	NA	NA|NA|NA	0	NA	NA|NA|NA	0	NA	NA|NA|NA	0	NA	NA|NA|NA	0	NA	NA	NA	NA	NA	NA	NA	NA	NA	NA	NA	NA	NA	NA	NA	NA	NA	NA	NA	NA
ABCA13	ATP binding cassette subfamily A member 13	154664	ENSG00000179869	HGNC:14638	FLJ33876|FLJ33951		07p12.3	protein-coding gene	Q86UQ4	0.35512	0.4332	0.35512	0	0	NA	NA|NA|NA	0	NA	NA|NA|NA	0	NA	NA|NA|NA	0	NA	NA|NA|NA	0	NA	NA|NA|NA	0	NA	NA	NA	NA	NA	NA	NA	NA	NA	NA	NA	NA	NA	NA	NA	NA	NA	NA	NA	NA
ABCA6	ATP binding cassette subfamily A member 6	23460	ENSG00000154262	HGNC:36	EST155051		17q24.2-q24.3	protein-coding gene	Q8N139	0.04283	0.027264	0.027264	0	0	NA	NA|NA|NA	0	NA	NA|NA|NA	0	NA	NA|NA|NA	0	NA	NA|NA|NA	0	NA	NA|NA|NA	0	NA	NA	NA	NA	NA	NA	NA	NA	NA	NA	NA	NA	NA	NA	NA	NA	NA	NA	NA	NA
ABCA8	ATP binding cassette subfamily A member 8	10351	ENSG00000141338	HGNC:38	KIAA0822		17q24.2	protein-coding gene	O94911	0.58749	0.49264	0.49264	0	0	NA	NA|NA|NA	0	NA	NA|NA|NA	0	NA	NA|NA|NA	0	NA	NA|NA|NA	0	NA	NA|NA|NA	0	NA	NA	NA	NA	NA	NA	NA	NA	NA	NA	NA	NA	NA	NA	NA	NA	NA	NA	NA	NA
ABCB1	ATP binding cassette subfamily B member 1	5243	ENSG00000085563	HGNC:40	P-gp|CD243|GP170|ABC20|p-170	PGY1|MDR1|CLCS	07q21.12	protein-coding gene	P08183	0.3652	0.42034	0.3652	0	0	NA	NA|NA|NA	0	NA	NA|NA|NA	0	NA	NA|NA|NA	0	NA	NA|NA|NA	0	NA	NA|NA|NA	0	NA	NA	NA	NA	NA	NA	NA	NA	NA	NA	NA	NA	NA	NA	NA	NA	NA	NA	NA	NA
ABCB11	ATP binding cassette subfamily B member 11	8647	ENSG00000073734	HGNC:42	ABC16|SPGP|PFIC-2|PGY4	BSEP|PFIC2	02q31.1	protein-coding gene	O95342	0.19681	0.16225	0.16225	0	0	NA	NA|NA|NA	0	NA	NA|NA|NA	0	NA	NA|NA|NA	0	NA	NA|NA|NA	0	NA	NA|NA|NA	0	NA	NA	NA	NA	NA	NA	NA	NA	NA	NA	NA	NA	NA	NA	NA	NA	NA	NA	NA	NA
ABCB5	ATP binding cassette subfamily B member 5	340273	ENSG00000004846	HGNC:46	EST422562|ABCB5beta|ABCB5alpha		07p21.1	protein-coding gene	Q2M3G0	0.5787	0.65543	0.5787	0	0	NA	NA|NA|NA	0	NA	NA|NA|NA	0	NA	NA|NA|NA	0	NA	NA|NA|NA	0	NA	NA|NA|NA	0	NA	NA	NA	NA	NA	NA	NA	NA	NA	NA	NA	NA	NA	NA	NA	NA	NA	NA	NA	NA
ABCB7	ATP binding cassette subfamily B member 7	22	ENSG00000131269	HGNC:48	EST140535|Atm1p|ASAT	ABC7	Xq13.3	protein-coding gene	O75027	NA	NA	NA	NA	0	NA	NA|NA|NA	0	NA	NA|NA|NA	0	NA	NA|NA|NA	0	NA	NA|NA|NA	0	NA	NA|NA|NA	0	NA	NA	NA	NA	NA	NA	NA	NA	NA	NA	NA	NA	NA	NA	NA	NA	NA	NA	NA	NA
ABCB8	ATP binding cassette subfamily B member 8	11194	ENSG00000197150	HGNC:49	EST328128|M-ABC1|MABC1|MITOSUR		07q36.1	protein-coding gene	Q9NUT2	0.28102	0.09521	0.09521	0	0	NA	NA|NA|NA	0	NA	NA|NA|NA	0	NA	NA|NA|NA	0	NA	NA|NA|NA	0	NA	NA|NA|NA	0	NA	NA	NA	NA	NA	NA	NA	NA	NA	NA	NA	NA	NA	NA	NA	NA	NA	NA	NA	NA
ABCC10	ATP binding cassette subfamily C member 10	89845	ENSG00000124574	HGNC:52	EST182763|MRP7|SIMRP7		06p21.1	protein-coding gene	Q5T3U5	0.18998	0.57085	0.18998	0	0	NA	NA|NA|NA	0	NA	NA|NA|NA	0	NA	NA|NA|NA	0	NA	NA|NA|NA	0	NA	NA|NA|NA	0	NA	NA	NA	NA	NA	NA	NA	NA	NA	NA	NA	NA	NA	NA	NA	NA	NA	NA	NA	NA
ABCC11	ATP binding cassette subfamily C member 11	85320	ENSG00000121270	HGNC:14639	MRP8		16q12.1	protein-coding gene	Q96J66	0.13114	0.14146	0.13114	0	0	NA	NA|NA|NA	0	NA	NA|NA|NA	0	NA	NA|NA|NA	0	NA	NA|NA|NA	0	NA	NA|NA|NA	0	NA	NA	NA	NA	NA	NA	NA	NA	NA	NA	NA	NA	NA	NA	NA	NA	NA	NA	NA	NA
ABCC12	ATP binding cassette subfamily C member 12	94160	ENSG00000140798	HGNC:14640	MRP9		16q12.1	protein-coding gene	Q96J65	0.58888	0.14734	0.14734	0	0	NA	NA|NA|NA	0	NA	NA|NA|NA	0	NA	NA|NA|NA	0	NA	NA|NA|NA	0	NA	NA|NA|NA	0	NA	NA	NA	NA	NA	NA	NA	NA	NA	NA	NA	NA	NA	NA	NA	NA	NA	NA	NA	NA
ABCC3	ATP binding cassette subfamily C member 3	8714	ENSG00000108846	HGNC:54	MRP3|cMOAT2|EST90757|MLP2|MOAT-D		17q21.33	protein-coding gene	O15438	0.62463	0.29887	0.29887	0	0	NA	NA|NA|NA	0	NA	NA|NA|NA	0	NA	NA|NA|NA	0	NA	NA|NA|NA	0	NA	NA|NA|NA	0	NA	NA	NA	NA	NA	NA	NA	NA	NA	NA	NA	NA	NA	NA	NA	NA	NA	NA	NA	NA
ABCC4	ATP binding cassette subfamily C member 4	10257	ENSG00000125257	HGNC:55	MRP4|EST170205|MOAT-B|MOATB		13q32.1	protein-coding gene	O15439	0.94335	0.81242	0.81242	0	0	NA	NA|NA|NA	0	NA	NA|NA|NA	0	NA	NA|NA|NA	0	NA	NA|NA|NA	0	NA	NA|NA|NA	0	NA	NA	NA	NA	NA	NA	NA	NA	NA	NA	NA	NA	NA	NA	NA	NA	NA	NA	NA	NA
ABCC8	ATP binding cassette subfamily C member 8	6833	ENSG00000006071	HGNC:59	HI|PHHI|SUR1|MRP8|ABC36|HHF1|TNDM2	SUR|HRINS	11p15.1	protein-coding gene	Q09428	0.59966	0.3189	0.3189	0	0	NA	NA|NA|NA	0	NA	NA|NA|NA	0	NA	NA|NA|NA	0	NA	NA|NA|NA	0	NA	NA|NA|NA	0	NA	NA	NA	NA	NA	NA	NA	NA	NA	NA	NA	NA	NA	NA	NA	NA	NA	NA	NA	NA
ABCC9	ATP binding cassette subfamily C member 9	10060	ENSG00000069431	HGNC:60	SUR2|CMD1O		12p12.1	protein-coding gene	O60706	0.2216	0.18033	0.18033	0	0	NA	NA|NA|NA	0	NA	NA|NA|NA	0	NA	NA|NA|NA	0	NA	NA|NA|NA	0	NA	NA|NA|NA	0	NA	NA	NA	NA	NA	NA	NA	NA	NA	NA	NA	NA	NA	NA	NA	NA	NA	NA	NA	NA
ABCD1	ATP binding cassette subfamily D member 1	215	ENSG00000101986	HGNC:61	AMN|ALDP|adrenoleukodystrophy	ALD	Xq28	protein-coding gene	P33897	NA	NA	NA	NA	0	NA	NA|NA|NA	0	NA	NA|NA|NA	0	NA	NA|NA|NA	0	NA	NA|NA|NA	0	NA	NA|NA|NA	0	NA	NA	NA	NA	NA	NA	NA	NA	NA	NA	NA	NA	NA	NA	NA	NA	NA	NA	NA	NA
ABCD3	ATP binding cassette subfamily D member 3	5825	ENSG00000117528	HGNC:67	PMP70|ZWS2	PXMP1	01p21.3	protein-coding gene	P28288	0.69554	0.73289	0.69554	0	0	NA	NA|NA|NA	0	NA	NA|NA|NA	0	NA	NA|NA|NA	0	NA	NA|NA|NA	0	NA	NA|NA|NA	0	NA	NA	NA	NA	NA	NA	NA	NA	NA	NA	NA	NA	NA	NA	NA	NA	NA	NA	NA	NA
ABCD4	ATP binding cassette subfamily D member 4	5826	ENSG00000119688	HGNC:68	PMP69|P70R|EST352188	PXMP1L	14q24.3	protein-coding gene	O14678	0.46556	0.12183	0.12183	0	0	NA	NA|NA|NA	0	NA	NA|NA|NA	0	NA	NA|NA|NA	0	NA	NA|NA|NA	0	NA	NA|NA|NA	0	NA	NA	NA	NA	NA	NA	NA	NA	NA	NA	NA	NA	NA	NA	NA	NA	NA	NA	NA	NA
ABCE1	ATP binding cassette subfamily E member 1	6059	ENSG00000164163	HGNC:69	RLI|OABP|RLI1	RNASEL1|RNASELI|RNS4I	04q31.21	protein-coding gene	P61221	0.94586	0.90327	0.90327	0	0	NA	NA|NA|NA	0	NA	NA|NA|NA	0	NA	NA|NA|NA	0	NA	NA|NA|NA	0	NA	NA|NA|NA	0	NA	NA	NA	NA	NA	NA	NA	NA	NA	NA	NA	NA	NA	NA	NA	NA	NA	NA	NA	NA
ABCG2	ATP binding cassette subfamily G member 2 (Junior blood group)	9429	ENSG00000118777	HGNC:74	EST157481|MXR|BCRP|ABCP|CD338		04q22.1	protein-coding gene	Q9UNQ0	0.62344	0.36941	0.36941	0	0	NA	NA|NA|NA	0	NA	NA|NA|NA	0	NA	NA|NA|NA	0	NA	NA|NA|NA	0	NA	NA|NA|NA	0	NA	NA	NA	NA	NA	NA	NA	NA	NA	NA	NA	NA	NA	NA	NA	NA	NA	NA	NA	NA
ABCG4	ATP binding cassette subfamily G member 4	64137	ENSG00000172350	HGNC:13884	WHITE2		11q23.3	protein-coding gene	Q9H172	0.6952	0.50427	0.50427	0	0	NA	NA|NA|NA	0	NA	NA|NA|NA	0	NA	NA|NA|NA	0	NA	NA|NA|NA	0	NA	NA|NA|NA	0	NA	NA	NA	NA	NA	NA	NA	NA	NA	NA	NA	NA	NA	NA	NA	NA	NA	NA	NA	NA
ABCG5	ATP binding cassette subfamily G member 5	64240	ENSG00000138075	HGNC:13886	STSL		02p21	protein-coding gene	Q9H222	0.43697	0.0056159	0.0056159	0	0	NA	NA|NA|NA	0	NA	NA|NA|NA	0	NA	NA|NA|NA	0	NA	NA|NA|NA	0	NA	NA|NA|NA	0	NA	NA	NA	NA	NA	NA	NA	NA	NA	NA	NA	NA	NA	NA	NA	NA	NA	NA	NA	NA
ABHD10	abhydrolase domain containing 10, depalmitoylase	55347	ENSG00000144827	HGNC:25656	FLJ11342		03q13.2	protein-coding gene	Q9NUJ1	0.14068	0.45398	0.14068	0	0	NA	NA|NA|NA	0	NA	NA|NA|NA	0	NA	NA|NA|NA	0	NA	NA|NA|NA	0	NA	NA|NA|NA	0	NA	NA	NA	NA	NA	NA	NA	NA	NA	NA	NA	NA	NA	NA	NA	NA	NA	NA	NA	NA
ABHD11	abhydrolase domain containing 11	83451	ENSG00000106077	HGNC:16407	PP1226	WBSCR21	07q11.23	protein-coding gene	Q8NFV4	0.67115	0.10746	0.10746	0	0	NA	NA|NA|NA	0	NA	NA|NA|NA	0	NA	NA|NA|NA	0	NA	NA|NA|NA	0	NA	NA|NA|NA	0	NA	NA	NA	NA	NA	NA	NA	NA	NA	NA	NA	NA	NA	NA	NA	NA	NA	NA	NA	NA
ABHD11-AS1	ABHD11 antisense RNA 1 (tail to tail)	171022	ENSG00000225969	HGNC:18289	NCRNA00035	WBSCR26|LINC00035	07q11.23	non-coding RNA		NA	NA	NA	NA	0	NA	NA|NA|NA	0	NA	NA|NA|NA	0	NA	NA|NA|NA	0	NA	NA|NA|NA	0	NA	NA|NA|NA	0	NA	NA	NA	NA	NA	NA	NA	NA	NA	NA	NA	NA	NA	NA	NA	NA	NA	NA	NA	NA
ABHD12B	abhydrolase domain containing 12B	145447	ENSG00000131969	HGNC:19837	BEM46L3	C14orf29	14q22.1	protein-coding gene	Q7Z5M8	0.28958	0.57445	0.28958	0	0	NA	NA|NA|NA	0	NA	NA|NA|NA	0	NA	NA|NA|NA	0	NA	NA|NA|NA	0	NA	NA|NA|NA	0	NA	NA	NA	NA	NA	NA	NA	NA	NA	NA	NA	NA	NA	NA	NA	NA	NA	NA	NA	NA
ABHD14A	abhydrolase domain containing 14A	25864	ENSG00000248487	HGNC:24538	DKFZP564O243|DORZ1		03p21.2	protein-coding gene	Q9BUJ0	0.29097	0.2399	0.2399	0	0	NA	NA|NA|NA	0	NA	NA|NA|NA	0	NA	NA|NA|NA	0	NA	NA|NA|NA	0	NA	NA|NA|NA	0	NA	NA	0	1	NA	NA	NA	NA	NA	0	NA	1	1	NA	NA	NA	NA	NA	NA	NA
ABHD14B	abhydrolase domain containing 14B	84836	ENSG00000114779	HGNC:28235	MGC15429|CIB		03p21.2	protein-coding gene	Q96IU4	0.21945	0.27914	0.21945	0	0	NA	NA|NA|NA	0	NA	NA|NA|NA	0	NA	NA|NA|NA	0	NA	NA|NA|NA	0	NA	NA|NA|NA	0	NA	NA	0	1	NA	NA	NA	NA	NA	0	NA	1	1	NA	NA	NA	NA	NA	NA	NA
ABHD16B	abhydrolase domain containing 16B	140701	ENSG00000183260	HGNC:16128	dJ591C20.1	C20orf135	20q13.33	protein-coding gene	Q9H3Z7	0.5213	0.35014	0.35014	0	0	NA	NA|NA|NA	0	NA	NA|NA|NA	0	NA	NA|NA|NA	0	NA	NA|NA|NA	0	NA	NA|NA|NA	0	NA	NA	NA	NA	NA	NA	NA	NA	NA	NA	NA	NA	NA	NA	NA	NA	NA	NA	NA	NA
ABHD17A	abhydrolase domain containing 17A, depalmitoylase	81926	ENSG00000129968	HGNC:28756	MGC5244	C19orf27|FAM108A1	19p13.3	protein-coding gene	Q96GS6	0.50389	0.55785	0.50389	0	0	NA	NA|NA|NA	0	NA	NA|NA|NA	0	NA	NA|NA|NA	0	NA	NA|NA|NA	0	NA	NA|NA|NA	0	NA	NA	NA	NA	NA	NA	NA	NA	NA	NA	NA	NA	NA	NA	NA	NA	NA	NA	NA	NA
ABHD2	abhydrolase domain containing 2, acylglycerol lipase	11057	ENSG00000140526	HGNC:18717	LABH2		15q26.1	protein-coding gene	P08910	0.29652	0.63097	0.29652	0	0	NA	NA|NA|NA	0	NA	NA|NA|NA	0	NA	NA|NA|NA	0	NA	NA|NA|NA	0	NA	NA|NA|NA	0	NA	NA	NA	NA	NA	NA	NA	NA	NA	NA	NA	NA	NA	NA	NA	NA	NA	NA	NA	NA
ABHD4	abhydrolase domain containing 4, N-acyl phospholipase B	63874	ENSG00000100439	HGNC:20154	FLJ12816		14q11.2	protein-coding gene	Q8TB40	0.34442	0.62505	0.34442	0	0	NA	NA|NA|NA	0	NA	NA|NA|NA	0	NA	NA|NA|NA	0	NA	NA|NA|NA	0	NA	NA|NA|NA	0	NA	NA	NA	NA	NA	NA	NA	NA	NA	NA	NA	NA	NA	NA	NA	NA	NA	NA	NA	NA
ABHD5	abhydrolase domain containing 5, lysophosphatidic acid acyltransferase	51099	ENSG00000011198	HGNC:21396	CGI-58|NCIE2		03p21.33	protein-coding gene	Q8WTS1	0.094684	0.030065	0.030065	0	0	NA	NA|NA|NA	0	NA	NA|NA|NA	0	NA	NA|NA|NA	0	NA	NA|NA|NA	0	NA	NA|NA|NA	0	NA	NA	NA	NA	NA	NA	NA	NA	NA	NA	NA	NA	NA	NA	NA	NA	NA	NA	NA	NA
ABHD6	abhydrolase domain containing 6, acylglycerol lipase	57406	ENSG00000163686	HGNC:21398			03p14.3	protein-coding gene	Q9BV23	0.5523	0.2127	0.2127	0	0	NA	NA|NA|NA	0	NA	NA|NA|NA	0	NA	NA|NA|NA	0	NA	NA|NA|NA	0	NA	NA|NA|NA	0	NA	NA	NA	NA	NA	NA	NA	NA	NA	NA	NA	NA	NA	NA	NA	NA	NA	NA	NA	NA
ABI1	abl interactor 1	10006	ENSG00000136754	HGNC:11320	E3B1|ABI-1	SSH3BP1	10p12.1	protein-coding gene	Q8IZP0	0.65173	0.49995	0.49995	0	0	NA	NA|NA|NA	0	NA	NA|NA|NA	0	NA	NA|NA|NA	0	NA	NA|NA|NA	0	NA	NA|NA|NA	0	NA	NA	NA	NA	NA	NA	NA	NA	NA	NA	NA	NA	NA	NA	NA	NA	NA	NA	NA	NA
ABI3	ABI family member 3	51225	ENSG00000108798	HGNC:29859	NESH|SSH3BP3		17q21.32	protein-coding gene	Q9P2A4	0.46033	0.17531	0.17531	0	0	NA	NA|NA|NA	0	NA	NA|NA|NA	0	NA	NA|NA|NA	0	NA	NA|NA|NA	0	NA	NA|NA|NA	0	NA	NA	NA	NA	NA	NA	NA	NA	NA	NA	NA	NA	NA	NA	NA	NA	NA	NA	NA	NA
ABI3BP	ABI family member 3 binding protein	25890	ENSG00000154175	HGNC:17265	NESHBP|DKFZP586L2024|TARSH		03q12.2	protein-coding gene	Q7Z7G0	0.51749	0.51497	0.51497	0	0	NA	NA|NA|NA	0	NA	NA|NA|NA	0	NA	NA|NA|NA	0	NA	NA|NA|NA	0	NA	NA|NA|NA	0	NA	NA	NA	NA	NA	NA	NA	NA	NA	NA	NA	NA	NA	NA	NA	NA	NA	NA	NA	NA
ABLIM2	actin binding LIM protein family member 2	84448	ENSG00000163995	HGNC:19195	KIAA1808		04p16.1	protein-coding gene	Q6H8Q1	0.63418	0.24089	0.24089	0	0	NA	NA|NA|NA	0	NA	NA|NA|NA	0	NA	NA|NA|NA	0	NA	NA|NA|NA	0	NA	NA|NA|NA	0	NA	NA	NA	NA	NA	NA	NA	NA	NA	NA	NA	NA	NA	NA	NA	NA	NA	NA	NA	NA
ABLIM3	actin binding LIM protein family member 3	22885	ENSG00000173210	HGNC:29132	KIAA0843		05q32	protein-coding gene	O94929	0.6167	0.31477	0.31477	0	0	NA	NA|NA|NA	0	NA	NA|NA|NA	0	NA	NA|NA|NA	0	NA	NA|NA|NA	0	NA	NA|NA|NA	0	NA	NA	NA	NA	NA	NA	NA	NA	NA	NA	NA	NA	NA	NA	NA	NA	NA	NA	NA	NA
ABO	ABO, alpha 1-3-N-acetylgalactosaminyltransferase and alpha 1-3-galactosyltransferase	28	ENSG00000175164	HGNC:79	A3GALNT|A3GALT1		09q34.2	protein-coding gene	P16442	0.29793	0.32309	0.29793	0	0	NA	NA|NA|NA	0	NA	NA|NA|NA	0	NA	NA|NA|NA	0	NA	NA|NA|NA	0	NA	NA|NA|NA	0	NA	NA	NA	NA	NA	NA	NA	NA	NA	NA	NA	NA	NA	NA	NA	NA	NA	NA	NA	NA
ABR	ABR activator of RhoGEF and GTPase	29	ENSG00000159842	HGNC:81	MDB		17p13.3	protein-coding gene	Q12979	0.059393	0.12334	0.059393	0	0	NA	NA|NA|NA	0	NA	NA|NA|NA	0	NA	NA|NA|NA	0	NA	NA|NA|NA	0	NA	NA|NA|NA	0	NA	NA	NA	NA	NA	NA	NA	NA	NA	NA	NA	NA	NA	NA	NA	NA	NA	NA	NA	NA
ABRAXAS2	abraxas 2, BRISC complex subunit	23172	ENSG00000165660	HGNC:28975	Em:AC068896.4|ABRO1	KIAA0157|FAM175B	10q26.13	protein-coding gene	Q15018	0.2571	0.38164	0.2571	0	0	NA	NA|NA|NA	0	NA	NA|NA|NA	0	NA	NA|NA|NA	0	NA	NA|NA|NA	0	NA	NA|NA|NA	0	NA	NA	NA	NA	NA	NA	NA	NA	NA	NA	NA	NA	NA	NA	NA	NA	NA	NA	NA	NA
ACACA	acetyl-CoA carboxylase alpha	31	ENSG00000278540	HGNC:84	ACC1|ACC-alpha|ACCA|ACCalpha|ACACalpha|Acac1|hACC1	ACAC|ACC	17q12	protein-coding gene	Q13085	0.52201	0.45333	0.45333	0	0	NA	NA|NA|NA	0	NA	NA|NA|NA	0	NA	NA|NA|NA	0	NA	NA|NA|NA	0	NA	NA|NA|NA	0	NA	NA	NA	NA	NA	NA	NA	NA	NA	NA	NA	NA	NA	NA	NA	NA	NA	NA	NA	NA
ACACB	acetyl-CoA carboxylase beta	32	ENSG00000076555	HGNC:85	HACC275|ACC2|ACCB|ACC-beta|ACCbeta|ACACbeta		12q24.11	protein-coding gene	O00763	0.90894	0.73972	0.73972	0	0	NA	NA|NA|NA	0	NA	NA|NA|NA	0	NA	NA|NA|NA	0	NA	NA|NA|NA	0	NA	NA|NA|NA	0	NA	NA	NA	NA	NA	NA	NA	NA	NA	NA	NA	NA	NA	NA	NA	NA	NA	NA	NA	NA
ACAD11	acyl-CoA dehydrogenase family member 11	84129	ENSG00000240303	HGNC:30211	FLJ12592		03q22.1	protein-coding gene	Q709F0	0.40341	0.65952	0.40341	0	0	NA	NA|NA|NA	0	NA	NA|NA|NA	0	NA	NA|NA|NA	0	NA	NA|NA|NA	0	NA	NA|NA|NA	0	NA	NA	NA	NA	NA	NA	NA	NA	NA	NA	NA	NA	NA	NA	NA	NA	NA	NA	NA	NA
ACAD9	acyl-CoA dehydrogenase family member 9	28976	ENSG00000177646	HGNC:21497	NPD002|MGC14452		03q21.3	protein-coding gene	Q9H845	0.60179	0.39932	0.39932	0	0	NA	NA|NA|NA	0	NA	NA|NA|NA	0	NA	NA|NA|NA	0	NA	NA|NA|NA	0	NA	NA|NA|NA	0	NA	NA	NA	NA	NA	NA	NA	NA	NA	NA	NA	NA	NA	NA	NA	NA	NA	NA	NA	NA
ACADL	acyl-CoA dehydrogenase long chain	33	ENSG00000115361	HGNC:88	LCAD|ACAD4		02q34	protein-coding gene	P28330	0.11848	0.11649	0.11649	0	0	NA	NA|NA|NA	0	NA	NA|NA|NA	0	NA	NA|NA|NA	0	NA	NA|NA|NA	0	NA	NA|NA|NA	0	NA	NA	NA	NA	NA	NA	NA	NA	NA	NA	NA	NA	NA	NA	NA	NA	NA	NA	NA	NA
ACADM	acyl-CoA dehydrogenase medium chain	34	ENSG00000117054	HGNC:89	MCAD|MCADH|ACAD1		01p31.1	protein-coding gene	P11310	0.20724	0.33363	0.20724	0	0	NA	NA|NA|NA	0	NA	NA|NA|NA	0	NA	NA|NA|NA	0	NA	NA|NA|NA	0	NA	NA|NA|NA	0	NA	NA	NA	NA	NA	NA	NA	NA	NA	NA	NA	NA	NA	NA	NA	NA	NA	NA	NA	NA
ACADS	acyl-CoA dehydrogenase short chain	35	ENSG00000122971	HGNC:90	SCAD|ACAD3		12q24.31	protein-coding gene	P16219	0.022621	0.022201	0.022201	0	0	NA	NA|NA|NA	0	NA	NA|NA|NA	0	NA	NA|NA|NA	0	NA	NA|NA|NA	0	NA	NA|NA|NA	0	NA	NA	0	1	NA	NA	NA	NA	NA	0	NA	1	1	NA	NA	NA	NA	NA	NA	NA
ACAP1	ArfGAP with coiled-coil, ankyrin repeat and PH domains 1	9744	ENSG00000072818	HGNC:16467	KIAA0050	CENTB1	17p13.1	protein-coding gene	Q15027	0.75347	0.67162	0.67162	0	0	NA	NA|NA|NA	0	NA	NA|NA|NA	0	NA	NA|NA|NA	0	NA	NA|NA|NA	0	NA	NA|NA|NA	0	NA	NA	NA	NA	NA	NA	NA	NA	NA	NA	NA	NA	NA	NA	NA	NA	NA	NA	NA	NA
ACAP2	ArfGAP with coiled-coil, ankyrin repeat and PH domains 2	23527	ENSG00000114331	HGNC:16469	KIAA0041|CNT-B2	CENTB2	03q29	protein-coding gene	Q15057	0.80157	0.76464	0.76464	0	0	NA	NA|NA|NA	0	NA	NA|NA|NA	0	NA	NA|NA|NA	0	NA	NA|NA|NA	0	NA	NA|NA|NA	0	NA	NA	NA	NA	NA	NA	NA	NA	NA	NA	NA	NA	NA	NA	NA	NA	NA	NA	NA	NA
ACAP3	ArfGAP with coiled-coil, ankyrin repeat and PH domains 3	116983	ENSG00000131584	HGNC:16754	KIAA1716	CENTB5	01p36.33	protein-coding gene	Q96P50	0.89768	0.75543	0.75543	0	0	NA	NA|NA|NA	0	NA	NA|NA|NA	0	NA	NA|NA|NA	0	NA	NA|NA|NA	0	NA	NA|NA|NA	0	NA	NA	NA	NA	NA	NA	NA	NA	NA	NA	NA	NA	NA	NA	NA	NA	NA	NA	NA	NA
ACAT1	acetyl-CoA acetyltransferase 1	38	ENSG00000075239	HGNC:93	THIL	ACAT	11q22.3	protein-coding gene	P24752	0.71062	0.72033	0.71062	0	0	NA	NA|NA|NA	0	NA	NA|NA|NA	0	NA	NA|NA|NA	0	NA	NA|NA|NA	0	NA	NA|NA|NA	0	NA	NA	NA	NA	NA	NA	NA	NA	NA	NA	NA	NA	NA	NA	NA	NA	NA	NA	NA	NA
ACBD3	acyl-CoA binding domain containing 3	64746	ENSG00000182827	HGNC:15453	GCP60|PAP7	GOLPH1|GOCAP1	01q42.12	protein-coding gene	Q9H3P7	0.61914	0.22453	0.22453	0	0	NA	NA|NA|NA	0	NA	NA|NA|NA	0	NA	NA|NA|NA	0	NA	NA|NA|NA	0	NA	NA|NA|NA	0	NA	NA	NA	NA	NA	NA	NA	NA	NA	NA	NA	NA	NA	NA	NA	NA	NA	NA	NA	NA
ACBD4	acyl-CoA binding domain containing 4	79777	ENSG00000181513	HGNC:23337	FLJ13322		17q21.31	protein-coding gene	Q8NC06	0.10263	0.21091	0.10263	0	0	NA	NA|NA|NA	0	NA	NA|NA|NA	0	NA	NA|NA|NA	0	NA	NA|NA|NA	0	NA	NA|NA|NA	0	NA	NA	NA	NA	NA	NA	NA	NA	NA	NA	NA	NA	NA	NA	NA	NA	NA	NA	NA	NA
ACCS	1-aminocyclopropane-1-carboxylate synthase homolog (inactive)	84680	ENSG00000110455	HGNC:23989	PHACS|ACS		11p11.2	protein-coding gene	Q96QU6	0.50869	0.89116	0.50869	0	0	NA	NA|NA|NA	0	NA	NA|NA|NA	0	NA	NA|NA|NA	0	NA	NA|NA|NA	0	NA	NA|NA|NA	0	NA	NA	NA	NA	NA	NA	NA	NA	NA	NA	NA	NA	NA	NA	NA	NA	NA	NA	NA	NA
ACE2	angiotensin converting enzyme 2	59272	ENSG00000130234	HGNC:13557	ACEH		Xp22.2	protein-coding gene	Q9BYF1	NA	NA	NA	NA	0	NA	NA|NA|NA	0	NA	NA|NA|NA	0	NA	NA|NA|NA	0	NA	NA|NA|NA	0	NA	NA|NA|NA	0	NA	NA	NA	NA	NA	NA	NA	NA	NA	NA	NA	NA	NA	NA	NA	NA	NA	NA	NA	NA
ACER1	alkaline ceramidase 1	125981	ENSG00000167769	HGNC:18356		ASAH3	19p13.3	protein-coding gene	Q8TDN7	0.77369	0.65301	0.65301	0	0	NA	NA|NA|NA	0	NA	NA|NA|NA	0	NA	NA|NA|NA	0	NA	NA|NA|NA	0	NA	NA|NA|NA	0	NA	NA	NA	NA	NA	NA	NA	NA	NA	NA	NA	NA	NA	NA	NA	NA	NA	NA	NA	NA
ACER3	alkaline ceramidase 3	55331	ENSG00000078124	HGNC:16066	FLJ11238|APHC	PHCA	11q13.5	protein-coding gene	Q9NUN7	0.15658	0.10155	0.10155	0	0	NA	NA|NA|NA	0	NA	NA|NA|NA	0	NA	NA|NA|NA	0	NA	NA|NA|NA	0	NA	NA|NA|NA	0	NA	NA	NA	NA	NA	NA	NA	NA	NA	NA	NA	NA	NA	NA	NA	NA	NA	NA	NA	NA
ACHE	acetylcholinesterase (Cartwright blood group)	43	ENSG00000087085	HGNC:108		YT	07q22.1	protein-coding gene	P22303	0.19284	0.088725	0.088725	0	0	NA	NA|NA|NA	0	NA	NA|NA|NA	0	NA	NA|NA|NA	0	NA	NA|NA|NA	0	NA	NA|NA|NA	0	NA	NA	NA	NA	NA	NA	NA	NA	NA	NA	NA	NA	NA	NA	NA	NA	NA	NA	NA	NA
ACIN1	apoptotic chromatin condensation inducer 1	22985	ENSG00000100813	HGNC:17066	KIAA0670|fSAP152	ACINUS	14q11.2	protein-coding gene	Q9UKV3	0.73618	0.37221	0.37221	0	0	NA	NA|NA|NA	0	NA	NA|NA|NA	0	NA	NA|NA|NA	0	NA	NA|NA|NA	0	NA	NA|NA|NA	0	NA	NA	NA	NA	NA	NA	NA	NA	NA	NA	NA	NA	NA	NA	NA	NA	NA	NA	NA	NA
ACKR1	atypical chemokine receptor 1 (Duffy blood group)	2532	ENSG00000213088	HGNC:4035	CCBP1|GPD|Dfy|CD234	FY|DARC	01q23.2	protein-coding gene	Q16570	0.63412	0.037458	0.037458	0	0	NA	NA|NA|NA	0	NA	NA|NA|NA	0	NA	NA|NA|NA	0	NA	NA|NA|NA	0	NA	NA|NA|NA	0	NA	NA	NA	NA	NA	NA	NA	NA	NA	NA	NA	NA	NA	NA	NA	NA	NA	NA	NA	NA
ACKR4	atypical chemokine receptor 4	51554	ENSG00000129048	HGNC:1611	CCR11|CCBP2|VSHK1|CCX-CKR|PPR1	CCRL1	03q22.1	protein-coding gene	Q9NPB9	0.59661	0.56838	0.56838	0	0	NA	NA|NA|NA	0	NA	NA|NA|NA	0	NA	NA|NA|NA	0	NA	NA|NA|NA	0	NA	NA|NA|NA	0	NA	NA	NA	NA	NA	NA	NA	NA	NA	NA	NA	NA	NA	NA	NA	NA	NA	NA	NA	NA
ACLY	ATP citrate lyase	47	ENSG00000131473	HGNC:115	ATPCL|CLATP|ACL		17q21.2	protein-coding gene	P53396	0.17298	0.18966	0.17298	0	0	NA	NA|NA|NA	0	NA	NA|NA|NA	0	NA	NA|NA|NA	0	NA	NA|NA|NA	0	NA	NA|NA|NA	0	NA	NA	NA	NA	NA	NA	NA	NA	NA	NA	NA	NA	NA	NA	NA	NA	NA	NA	NA	NA
ACO1	aconitase 1	48	ENSG00000122729	HGNC:117	IRP1|IREBP	IREB1	09p21.1	protein-coding gene	P21399	0.57939	0.53191	0.53191	0	0	NA	NA|NA|NA	0	NA	NA|NA|NA	0	NA	NA|NA|NA	0	NA	NA|NA|NA	0	NA	NA|NA|NA	0	NA	NA	NA	NA	NA	NA	NA	NA	NA	NA	NA	NA	NA	NA	NA	NA	NA	NA	NA	NA
ACOT11	acyl-CoA thioesterase 11	26027	ENSG00000162390	HGNC:18156	STARD14|BFIT|KIAA0707|BFIT1|THEM1	THEA	01p32.3	protein-coding gene	Q8WXI4	0.2932	0.28427	0.28427	0	0	NA	NA|NA|NA	0	NA	NA|NA|NA	0	NA	NA|NA|NA	0	NA	NA|NA|NA	0	NA	NA|NA|NA	0	NA	NA	NA	NA	NA	NA	NA	NA	NA	NA	NA	NA	NA	NA	NA	NA	NA	NA	NA	NA
ACOT12	acyl-CoA thioesterase 12	134526	ENSG00000172497	HGNC:24436	Cach|THEAL|STARD15		05q14.1	protein-coding gene	Q8WYK0	0.98513	0.83013	0.83013	0	0	NA	NA|NA|NA	0	NA	NA|NA|NA	0	NA	NA|NA|NA	0	NA	NA|NA|NA	0	NA	NA|NA|NA	0	NA	NA	NA	NA	NA	NA	NA	NA	NA	NA	NA	NA	NA	NA	NA	NA	NA	NA	NA	NA
ACOT13	acyl-CoA thioesterase 13	55856	ENSG00000112304	HGNC:20999	HT012	THEM2	06p22.3	protein-coding gene	Q9NPJ3	0.099706	0.19205	0.099706	0	0	NA	NA|NA|NA	0	NA	NA|NA|NA	0	NA	NA|NA|NA	0	NA	NA|NA|NA	0	NA	NA|NA|NA	0	NA	NA	NA	NA	NA	NA	NA	NA	NA	NA	NA	NA	NA	NA	NA	NA	NA	NA	NA	NA
ACOT2	acyl-CoA thioesterase 2	10965	ENSG00000119673	HGNC:18431	Mte1|ZAP128		14q24.3	protein-coding gene	P49753	0.37263	0.85257	0.37263	0	0	NA	NA|NA|NA	0	NA	NA|NA|NA	0	NA	NA|NA|NA	0	NA	NA|NA|NA	0	NA	NA|NA|NA	0	NA	NA	NA	NA	NA	NA	NA	NA	NA	NA	NA	NA	NA	NA	NA	NA	NA	NA	NA	NA
ACOT7	acyl-CoA thioesterase 7	11332	ENSG00000097021	HGNC:24157	BACH|ACH1|ACT|CTE-II|LACH1|MGC1126|hBACH		01p36.31	protein-coding gene	O00154	0.85879	0.94219	0.85879	0	0	NA	NA|NA|NA	0	NA	NA|NA|NA	0	NA	NA|NA|NA	0	NA	NA|NA|NA	0	NA	NA|NA|NA	0	NA	NA	NA	NA	NA	NA	NA	NA	NA	NA	NA	NA	NA	NA	NA	NA	NA	NA	NA	NA
ACOT8	acyl-CoA thioesterase 8	10005	ENSG00000101473	HGNC:15919	hACTE-III|hTE|PTE-2|NAP1	PTE1	20q13.12	protein-coding gene	O14734	0.026204	0.059058	0.026204	0	0	NA	NA|NA|NA	0	NA	NA|NA|NA	0	NA	NA|NA|NA	0	NA	NA|NA|NA	0	NA	NA|NA|NA	0	NA	NA	NA	NA	NA	NA	NA	NA	NA	NA	NA	NA	NA	NA	NA	NA	NA	NA	NA	NA
ACP1	acid phosphatase 1	52	ENSG00000143727	HGNC:122	HAAP|LMW-PTP|LMWPTP		02p25.3	protein-coding gene	P24666	0.55293	0.73601	0.55293	0	0	NA	NA|NA|NA	0	NA	NA|NA|NA	0	NA	NA|NA|NA	0	NA	NA|NA|NA	0	NA	NA|NA|NA	0	NA	NA	NA	NA	NA	NA	NA	NA	NA	NA	NA	NA	NA	NA	NA	NA	NA	NA	NA	NA
ACP2	acid phosphatase 2, lysosomal	53	ENSG00000134575	HGNC:123	LAP		11p11.2	protein-coding gene	P11117	0.014682	0.06633	0.014682	0	0	NA	NA|NA|NA	0	NA	NA|NA|NA	0	NA	NA|NA|NA	0	NA	NA|NA|NA	0	NA	NA|NA|NA	0	NA	NA	NA	NA	NA	NA	NA	NA	NA	NA	NA	NA	NA	NA	NA	NA	NA	NA	NA	NA
ACP3	acid phosphatase 3	55	ENSG00000014257	HGNC:125	ACP-3|PAP|TM-PAP	ACPP	03q22.1	protein-coding gene	P15309	0.69413	0.8705	0.69413	0	0	NA	NA|NA|NA	0	NA	NA|NA|NA	0	NA	NA|NA|NA	0	NA	NA|NA|NA	0	NA	NA|NA|NA	0	NA	NA	NA	NA	NA	NA	NA	NA	NA	NA	NA	NA	NA	NA	NA	NA	NA	NA	NA	NA
ACP6	acid phosphatase 6, lysophosphatidic	51205	ENSG00000162836	HGNC:29609	LPAP|ACPL1		01q21.2	protein-coding gene	Q9NPH0	0.67268	0.83882	0.67268	0	0	NA	NA|NA|NA	0	NA	NA|NA|NA	0	NA	NA|NA|NA	0	NA	NA|NA|NA	0	NA	NA|NA|NA	0	NA	NA	NA	NA	NA	NA	NA	NA	NA	NA	NA	NA	NA	NA	NA	NA	NA	NA	NA	NA
ACP7	acid phosphatase 7, tartrate resistant (putative)	390928	ENSG00000183760	HGNC:33781	FLJ16165|PAPL1|PAPL		19q13.2	protein-coding gene	Q6ZNF0	0.085497	0.098869	0.085497	0	0	NA	NA|NA|NA	0	NA	NA|NA|NA	0	NA	NA|NA|NA	0	NA	NA|NA|NA	0	NA	NA|NA|NA	0	NA	NA	NA	NA	NA	NA	NA	NA	NA	NA	NA	NA	NA	NA	NA	NA	NA	NA	NA	NA
ACRBP	acrosin binding protein	84519	ENSG00000111644	HGNC:17195	SP32|OY-TES-1|CT23		12p13.31	protein-coding gene	Q8NEB7	0.21444	0.094971	0.094971	0	0	NA	NA|NA|NA	0	NA	NA|NA|NA	0	NA	NA|NA|NA	0	NA	NA|NA|NA	0	NA	NA|NA|NA	0	NA	NA	NA	NA	NA	NA	NA	NA	NA	NA	NA	NA	NA	NA	NA	NA	NA	NA	NA	NA
ACSBG1	acyl-CoA synthetase bubblegum family member 1	23205	ENSG00000103740	HGNC:29567	BGM|FLJ30320|MGC14352|BG1|KIAA0631|hBG1|hsBG		15q25.1	protein-coding gene	Q96GR2	0.70273	0.38383	0.38383	0	0	NA	NA|NA|NA	0	NA	NA|NA|NA	0	NA	NA|NA|NA	0	NA	NA|NA|NA	0	NA	NA|NA|NA	0	NA	NA	0	1	NA	NA	NA	NA	NA	0	NA	1	1	NA	NA	NA	NA	NA	NA	NA
ACSF3	acyl-CoA synthetase family member 3	197322	ENSG00000176715	HGNC:27288			16q24.3	protein-coding gene	Q4G176	0.47466	0.49484	0.47466	0	0	NA	NA|NA|NA	0	NA	NA|NA|NA	0	NA	NA|NA|NA	0	NA	NA|NA|NA	0	NA	NA|NA|NA	0	NA	NA	NA	NA	NA	NA	NA	NA	NA	NA	NA	NA	NA	NA	NA	NA	NA	NA	NA	NA
ACSL1	acyl-CoA synthetase long chain family member 1	2180	ENSG00000151726	HGNC:3569	LACS2|LACS|ACS1|LACS1|FACL1	FACL2	04q35.1	protein-coding gene	P33121	0.70645	0.55491	0.55491	0	0	NA	NA|NA|NA	0	NA	NA|NA|NA	0	NA	NA|NA|NA	0	NA	NA|NA|NA	0	NA	NA|NA|NA	0	NA	NA	NA	NA	NA	NA	NA	NA	NA	NA	NA	NA	NA	NA	NA	NA	NA	NA	NA	NA
ACSL3	acyl-CoA synthetase long chain family member 3	2181	ENSG00000123983	HGNC:3570	ACS3|PRO2194	FACL3	02q36.1	protein-coding gene	O95573	0.3605	0.1178	0.1178	0	0	NA	NA|NA|NA	0	NA	NA|NA|NA	0	NA	NA|NA|NA	0	NA	NA|NA|NA	0	NA	NA|NA|NA	0	NA	NA	NA	NA	NA	NA	NA	NA	NA	NA	NA	NA	NA	NA	NA	NA	NA	NA	NA	NA
ACSL5	acyl-CoA synthetase long chain family member 5	51703	ENSG00000197142	HGNC:16526	ACS5|ACS2	FACL5	10q25.2	protein-coding gene	Q9ULC5	0.87966	0.96954	0.87966	0	0	NA	NA|NA|NA	0	NA	NA|NA|NA	0	NA	NA|NA|NA	0	NA	NA|NA|NA	0	NA	NA|NA|NA	0	NA	NA	NA	NA	NA	NA	NA	NA	NA	NA	NA	NA	NA	NA	NA	NA	NA	NA	NA	NA
ACSL6	acyl-CoA synthetase long chain family member 6	23305	ENSG00000164398	HGNC:16496	KIAA0837|ACS2|LACS5|LACS2	FACL6	05q31.1	protein-coding gene	Q9UKU0	0.64578	0.67003	0.64578	0	0	NA	NA|NA|NA	0	NA	NA|NA|NA	0	NA	NA|NA|NA	0	NA	NA|NA|NA	0	NA	NA|NA|NA	0	NA	NA	NA	NA	NA	NA	NA	NA	NA	NA	NA	NA	NA	NA	NA	NA	NA	NA	NA	NA
ACSM5	acyl-CoA synthetase medium chain family member 5	54988	ENSG00000183549	HGNC:26060	FLJ20581		16p12.3	protein-coding gene	Q6NUN0	0.76028	0.69373	0.69373	0	0	NA	NA|NA|NA	0	NA	NA|NA|NA	0	NA	NA|NA|NA	0	NA	NA|NA|NA	0	NA	NA|NA|NA	0	NA	NA	NA	NA	NA	NA	NA	NA	NA	NA	NA	NA	NA	NA	NA	NA	NA	NA	NA	NA
ACSS1	acyl-CoA synthetase short chain family member 1	84532	ENSG00000154930	HGNC:16091	dJ568C11.3|AceCS2L|MGC33843	ACAS2L	20p11.21	protein-coding gene	Q9NUB1	0.59376	0.50045	0.50045	0	0	NA	NA|NA|NA	0	NA	NA|NA|NA	0	NA	NA|NA|NA	0	NA	NA|NA|NA	0	NA	NA|NA|NA	0	NA	NA	NA	NA	NA	NA	NA	NA	NA	NA	NA	NA	NA	NA	NA	NA	NA	NA	NA	NA
ACTA1	actin alpha 1, skeletal muscle	58	ENSG00000143632	HGNC:129	NEM3	ACTA	01q42.13	protein-coding gene	P68133	0.1031	0.32378	0.1031	0	0	NA	NA|NA|NA	0	NA	NA|NA|NA	0	NA	NA|NA|NA	0	NA	NA|NA|NA	0	NA	NA|NA|NA	0	NA	NA	NA	NA	NA	NA	NA	NA	NA	NA	NA	NA	NA	NA	NA	NA	NA	NA	NA	NA
ACTB	actin beta	60	ENSG00000075624	HGNC:132			07p22.1	protein-coding gene	P60709	0.47881	0.62671	0.47881	0	0	NA	NA|NA|NA	0	NA	NA|NA|NA	0	NA	NA|NA|NA	0	NA	NA|NA|NA	0	NA	NA|NA|NA	0	NA	NA	NA	NA	NA	NA	NA	NA	NA	NA	NA	NA	NA	NA	NA	NA	NA	NA	NA	NA
ACTC1	actin alpha cardiac muscle 1	70	ENSG00000159251	HGNC:143	CMD1R	ACTC	15q14	protein-coding gene	P68032	0.92763	0.69307	0.69307	0	0	NA	NA|NA|NA	0	NA	NA|NA|NA	0	NA	NA|NA|NA	0	NA	NA|NA|NA	0	NA	NA|NA|NA	0	NA	NA	NA	NA	NA	NA	NA	NA	NA	NA	NA	NA	NA	NA	NA	NA	NA	NA	NA	NA
ACTG1	actin gamma 1	71	ENSG00000184009	HGNC:144		ACTG|DFNA20|DFNA26	17q25.3	protein-coding gene	P63261	0.18467	0.763	0.18467	0	0	NA	NA|NA|NA	0	NA	NA|NA|NA	0	NA	NA|NA|NA	0	NA	NA|NA|NA	0	NA	NA|NA|NA	0	NA	NA	NA	NA	NA	NA	NA	NA	NA	NA	NA	NA	NA	NA	NA	NA	NA	NA	NA	NA
ACTL6B	actin like 6B	51412	ENSG00000077080	HGNC:160	BAF53B|SMARCN2	ACTL6	07q22.1	protein-coding gene	O94805	0.499	0.36024	0.36024	0	0	NA	NA|NA|NA	0	NA	NA|NA|NA	0	NA	NA|NA|NA	0	NA	NA|NA|NA	0	NA	NA|NA|NA	0	NA	NA	NA	NA	NA	NA	NA	NA	NA	NA	NA	NA	NA	NA	NA	NA	NA	NA	NA	NA
ACTL7A	actin like 7A	10881	ENSG00000187003	HGNC:161			09q31.3	protein-coding gene	Q9Y615	0.3877	0.85661	0.3877	0	0	NA	NA|NA|NA	0	NA	NA|NA|NA	0	NA	NA|NA|NA	0	NA	NA|NA|NA	0	NA	NA|NA|NA	0	NA	NA	NA	NA	NA	NA	NA	NA	NA	NA	NA	NA	NA	NA	NA	NA	NA	NA	NA	NA
ACTL8	actin like 8	81569	ENSG00000117148	HGNC:24018	CT57		01p36.13	protein-coding gene	Q9H568	0.78363	0.94864	0.78363	0	0	NA	NA|NA|NA	0	NA	NA|NA|NA	0	NA	NA|NA|NA	0	NA	NA|NA|NA	0	NA	NA|NA|NA	0	NA	NA	NA	NA	NA	NA	NA	NA	NA	NA	NA	NA	NA	NA	NA	NA	NA	NA	NA	NA
ACTL9	actin like 9	284382	ENSG00000181786	HGNC:28494	MGC33407		19p13.2	protein-coding gene	Q8TC94	0.98247	0.90516	0.90516	0	0	NA	NA|NA|NA	0	NA	NA|NA|NA	0	NA	NA|NA|NA	0	NA	NA|NA|NA	0	NA	NA|NA|NA	0	NA	NA	NA	NA	NA	NA	NA	NA	NA	NA	NA	NA	NA	NA	NA	NA	NA	NA	NA	NA
ACTN2	actinin alpha 2	88	ENSG00000077522	HGNC:164			01q43	protein-coding gene	P35609	0.27279	0.64241	0.27279	0	0	NA	NA|NA|NA	0	NA	NA|NA|NA	0	NA	NA|NA|NA	0	NA	NA|NA|NA	0	NA	NA|NA|NA	0	NA	NA	NA	NA	NA	NA	NA	NA	NA	NA	NA	NA	NA	NA	NA	NA	NA	NA	NA	NA
ACTN3	actinin alpha 3	89	ENSG00000248746	HGNC:165			11q13.2	protein-coding gene	Q08043	0.49739	0.68717	0.49739	0	0	NA	NA|NA|NA	0	NA	NA|NA|NA	0	NA	NA|NA|NA	0	NA	NA|NA|NA	0	NA	NA|NA|NA	0	NA	NA	NA	NA	NA	NA	NA	NA	NA	NA	NA	NA	NA	NA	NA	NA	NA	NA	NA	NA
ACTN4	actinin alpha 4	81	ENSG00000130402	HGNC:166		FSGS1	19q13.2	protein-coding gene	O43707	0.099936	0.10349	0.099936	0	0	NA	NA|NA|NA	0	NA	NA|NA|NA	0	NA	NA|NA|NA	0	NA	NA|NA|NA	0	NA	NA|NA|NA	0	NA	NA	NA	NA	NA	NA	NA	NA	NA	NA	NA	NA	NA	NA	NA	NA	NA	NA	NA	NA
ACTR2	actin related protein 2	10097	ENSG00000138071	HGNC:169	ARP2		02p14	protein-coding gene	P61160	0.76761	0.60607	0.60607	0	0	NA	NA|NA|NA	0	NA	NA|NA|NA	0	NA	NA|NA|NA	0	NA	NA|NA|NA	0	NA	NA|NA|NA	0	NA	NA	NA	NA	NA	NA	NA	NA	NA	NA	NA	NA	NA	NA	NA	NA	NA	NA	NA	NA
ACTR6	actin related protein 6	64431	ENSG00000075089	HGNC:24025	ARP6|FLJ13433		12q23.1	protein-coding gene	Q9GZN1	0.66706	0.23935	0.23935	0	0	NA	NA|NA|NA	0	NA	NA|NA|NA	0	NA	NA|NA|NA	0	NA	NA|NA|NA	0	NA	NA|NA|NA	0	NA	NA	NA	NA	NA	NA	NA	NA	NA	NA	NA	NA	NA	NA	NA	NA	NA	NA	NA	NA
ACVR1B	activin A receptor type 1B	91	ENSG00000135503	HGNC:172	ALK4|SKR2|ActRIB	ACVRLK4	12q13.13	protein-coding gene	P36896	0.64441	0.28731	0.28731	0	0	NA	NA|NA|NA	0	NA	NA|NA|NA	0	NA	NA|NA|NA	0	NA	NA|NA|NA	0	NA	NA|NA|NA	0	NA	NA	NA	NA	NA	NA	NA	NA	NA	NA	NA	NA	NA	NA	NA	NA	NA	NA	NA	NA
ACVRL1	activin A receptor like type 1	94	ENSG00000139567	HGNC:175	HHT2|ALK1|HHT	ACVRLK1|ORW2	12q13.13	protein-coding gene	P37023	0.96973	0.97734	0.96973	0	0	NA	NA|NA|NA	0	NA	NA|NA|NA	0	NA	NA|NA|NA	0	NA	NA|NA|NA	0	NA	NA|NA|NA	0	NA	NA	NA	NA	NA	NA	NA	NA	NA	NA	NA	NA	NA	NA	NA	NA	NA	NA	NA	NA
ACY1	aminoacylase 1	95	ENSG00000243989	HGNC:177			03p21.2	protein-coding gene	Q03154	0.41769	0.17137	0.17137	0	0	NA	NA|NA|NA	0	NA	NA|NA|NA	0	NA	NA|NA|NA	0	NA	NA|NA|NA	0	NA	NA|NA|NA	0	NA	NA	0	1	NA	NA	NA	NA	NA	0	NA	1	1	NA	NA	NA	NA	NA	NA	NA
ACYP1	acylphosphatase 1	97	ENSG00000119640	HGNC:179			14q24.3	protein-coding gene	P07311	0.0088378	0.0088162	0.0088162	0	0	NA	NA|NA|NA	0	NA	NA|NA|NA	0	NA	NA|NA|NA	0	NA	NA|NA|NA	0	NA	NA|NA|NA	0	NA	NA	NA	NA	NA	NA	NA	NA	NA	NA	NA	NA	NA	NA	NA	NA	NA	NA	NA	NA
ACYP2	acylphosphatase 2	98	ENSG00000170634	HGNC:180			02p16.2	protein-coding gene	P14621	0.43346	0.1205	0.1205	0	0	NA	NA|NA|NA	0	NA	NA|NA|NA	0	NA	NA|NA|NA	0	NA	NA|NA|NA	0	NA	NA|NA|NA	0	NA	NA	NA	NA	NA	NA	NA	NA	NA	NA	NA	NA	NA	NA	NA	NA	NA	NA	NA	NA
ADA	adenosine deaminase	100	ENSG00000196839	HGNC:186	ADA1		20q13.12	protein-coding gene	P00813	0.69532	0.35473	0.35473	0	0	NA	NA|NA|NA	0	NA	NA|NA|NA	0	NA	NA|NA|NA	0	NA	NA|NA|NA	0	NA	NA|NA|NA	0	NA	NA	NA	NA	NA	NA	NA	NA	NA	NA	NA	NA	NA	NA	NA	NA	NA	NA	NA	NA
ADA2	adenosine deaminase 2	51816	ENSG00000093072	HGNC:1839	ADGF	IDGFL|CECR1	22q11.1	protein-coding gene	Q9NZK5	0.22312	0.12995	0.12995	0	0	NA	NA|NA|NA	0	NA	NA|NA|NA	0	NA	NA|NA|NA	0	NA	NA|NA|NA	0	NA	NA|NA|NA	0	NA	NA	NA	NA	NA	NA	NA	NA	NA	NA	NA	NA	NA	NA	NA	NA	NA	NA	NA	NA
ADAD2	adenosine deaminase domain containing 2	161931	ENSG00000140955	HGNC:30714	TENRL|FLJ00337		16q24.1	protein-coding gene	Q8NCV1	0.62893	0.92453	0.62893	0	0	NA	NA|NA|NA	0	NA	NA|NA|NA	0	NA	NA|NA|NA	0	NA	NA|NA|NA	0	NA	NA|NA|NA	0	NA	NA	NA	NA	NA	NA	NA	NA	NA	NA	NA	NA	NA	NA	NA	NA	NA	NA	NA	NA
ADAM11	ADAM metallopeptidase domain 11	4185	ENSG00000073670	HGNC:189		MDC	17q21.31	protein-coding gene	O75078	0.21585	0.25561	0.21585	0	0	NA	NA|NA|NA	0	NA	NA|NA|NA	0	NA	NA|NA|NA	0	NA	NA|NA|NA	0	NA	NA|NA|NA	0	NA	NA	NA	NA	NA	NA	NA	NA	NA	NA	NA	NA	NA	NA	NA	NA	NA	NA	NA	NA
ADAM15	ADAM metallopeptidase domain 15	8751	ENSG00000143537	HGNC:193	MDC15		01q21.3	protein-coding gene	Q13444	0.82904	0.61104	0.61104	0	0	NA	NA|NA|NA	0	NA	NA|NA|NA	0	NA	NA|NA|NA	0	NA	NA|NA|NA	0	NA	NA|NA|NA	0	NA	NA	NA	NA	NA	NA	NA	NA	NA	NA	NA	NA	NA	NA	NA	NA	NA	NA	NA	NA
ADAM17	ADAM metallopeptidase domain 17	6868	ENSG00000151694	HGNC:195	cSVP|CD156B	TACE	02p25.1	protein-coding gene	P78536	0.54746	0.70836	0.54746	0	0	NA	NA|NA|NA	0	NA	NA|NA|NA	0	NA	NA|NA|NA	0	NA	NA|NA|NA	0	NA	NA|NA|NA	0	NA	NA	NA	NA	NA	NA	NA	NA	NA	NA	NA	NA	NA	NA	NA	NA	NA	NA	NA	NA
ADAM19	ADAM metallopeptidase domain 19	8728	ENSG00000135074	HGNC:197	MLTNB		05q33.3	protein-coding gene	Q9H013	0.19085	0.14556	0.14556	0	0	NA	NA|NA|NA	0	NA	NA|NA|NA	0	NA	NA|NA|NA	0	NA	NA|NA|NA	0	NA	NA|NA|NA	0	NA	NA	NA	NA	NA	NA	NA	NA	NA	NA	NA	NA	NA	NA	NA	NA	NA	NA	NA	NA
ADAM28	ADAM metallopeptidase domain 28	10863	ENSG00000042980	HGNC:206	eMDCII|MDC-Lm|MDC-Ls|ADAM23		08p21.2	protein-coding gene	Q9UKQ2	0.0062078	0.02573	0.0062078	0	0	NA	NA|NA|NA	0	NA	NA|NA|NA	0	NA	NA|NA|NA	0	NA	NA|NA|NA	0	NA	NA|NA|NA	0	NA	NA	NA	NA	NA	NA	NA	NA	NA	NA	NA	NA	NA	NA	NA	NA	NA	NA	NA	NA
ADAM32	ADAM metallopeptidase domain 32	203102	ENSG00000197140	HGNC:15479			08p11.22	protein-coding gene	Q8TC27	0.36823	0.51706	0.36823	0	0	NA	NA|NA|NA	0	NA	NA|NA|NA	0	NA	NA|NA|NA	0	NA	NA|NA|NA	0	NA	NA|NA|NA	0	NA	NA	NA	NA	NA	NA	NA	NA	NA	NA	NA	NA	NA	NA	NA	NA	NA	NA	NA	NA
ADAM33	ADAM metallopeptidase domain 33	80332	ENSG00000149451	HGNC:15478	DKFZp434K0521|dJ964F7.1	C20orf153	20p13	protein-coding gene	Q9BZ11	0.22393	0.17065	0.17065	0	0	NA	NA|NA|NA	0	NA	NA|NA|NA	0	NA	NA|NA|NA	0	NA	NA|NA|NA	0	NA	NA|NA|NA	0	NA	NA	NA	NA	NA	NA	NA	NA	NA	NA	NA	NA	NA	NA	NA	NA	NA	NA	NA	NA
ADAM5	ADAM metallopeptidase domain 5 (pseudogene)	255926	ENSG00000196115	HGNC:212	tMDCII	ADAM5P	08p11.22	pseudogene	Q6NVV9	NA	NA	NA	NA	0	NA	NA|NA|NA	0	NA	NA|NA|NA	0	NA	NA|NA|NA	0	NA	NA|NA|NA	0	NA	NA|NA|NA	0	NA	NA	NA	NA	NA	NA	NA	NA	NA	NA	NA	NA	NA	NA	NA	NA	NA	NA	NA	NA
ADAM7	ADAM metallopeptidase domain 7	8756	ENSG00000069206	HGNC:214	GP-83|EAPI		08p21.2	protein-coding gene	Q9H2U9	0.1425	0.043964	0.043964	0	0	NA	NA|NA|NA	0	NA	NA|NA|NA	0	NA	NA|NA|NA	0	NA	NA|NA|NA	0	NA	NA|NA|NA	0	NA	NA	NA	NA	NA	NA	NA	NA	NA	NA	NA	NA	NA	NA	NA	NA	NA	NA	NA	NA
ADAM8	ADAM metallopeptidase domain 8	101	ENSG00000151651	HGNC:215	CD156|MS2|CD156A		10q26.3	protein-coding gene	P78325	0.09541	0.54443	0.09541	0	0	NA	NA|NA|NA	0	NA	NA|NA|NA	0	NA	NA|NA|NA	0	NA	NA|NA|NA	0	NA	NA|NA|NA	0	NA	NA	NA	NA	NA	NA	NA	NA	NA	NA	NA	NA	NA	NA	NA	NA	NA	NA	NA	NA
ADAM9	ADAM metallopeptidase domain 9	8754	ENSG00000168615	HGNC:216	MDC9|KIAA0021|MCMP|Mltng	CORD9	08p11.22	protein-coding gene	Q13443	0.77397	0.68252	0.68252	0	0	NA	NA|NA|NA	0	NA	NA|NA|NA	0	NA	NA|NA|NA	0	NA	NA|NA|NA	0	NA	NA|NA|NA	0	NA	NA	NA	NA	NA	NA	NA	NA	NA	NA	NA	NA	NA	NA	NA	NA	NA	NA	NA	NA
ADAMTS10	ADAM metallopeptidase with thrombospondin type 1 motif 10	81794	ENSG00000142303	HGNC:13201	ADAM-TS10		19p13.2	protein-coding gene	Q9H324	0.77274	0.27249	0.27249	0	0	NA	NA|NA|NA	0	NA	NA|NA|NA	0	NA	NA|NA|NA	0	NA	NA|NA|NA	0	NA	NA|NA|NA	0	NA	NA	NA	NA	NA	NA	NA	NA	NA	NA	NA	NA	NA	NA	NA	NA	NA	NA	NA	NA
ADAMTS12	ADAM metallopeptidase with thrombospondin type 1 motif 12	81792	ENSG00000151388	HGNC:14605			05p13.3-p13.2	protein-coding gene	P58397	0.14288	0.12779	0.12779	0	0	NA	NA|NA|NA	0	NA	NA|NA|NA	0	NA	NA|NA|NA	0	NA	NA|NA|NA	0	NA	NA|NA|NA	0	NA	NA	NA	NA	NA	NA	NA	NA	NA	NA	NA	NA	NA	NA	NA	NA	NA	NA	NA	NA
ADAMTS13	ADAM metallopeptidase with thrombospondin type 1 motif 13	11093	ENSG00000160323	HGNC:1366	VWFCP|TTP|vWF-CP|FLJ42993|MGC118899|MGC118900|DKFZp434C2322	C9orf8	09q34.2	protein-coding gene	Q76LX8	0.32906	0.59834	0.32906	0	0	NA	NA|NA|NA	0	NA	NA|NA|NA	0	NA	NA|NA|NA	0	NA	NA|NA|NA	0	NA	NA|NA|NA	0	NA	NA	NA	NA	NA	NA	NA	NA	NA	NA	NA	NA	NA	NA	NA	NA	NA	NA	NA	NA
ADAMTS14	ADAM metallopeptidase with thrombospondin type 1 motif 14	140766	ENSG00000138316	HGNC:14899			10q22.1	protein-coding gene	Q8WXS8	0.13104	0.48913	0.13104	0	0	NA	NA|NA|NA	0	NA	NA|NA|NA	0	NA	NA|NA|NA	0	NA	NA|NA|NA	0	NA	NA|NA|NA	0	NA	NA	NA	NA	NA	NA	NA	NA	NA	NA	NA	NA	NA	NA	NA	NA	NA	NA	NA	NA
ADAMTS16	ADAM metallopeptidase with thrombospondin type 1 motif 16	170690	ENSG00000145536	HGNC:17108	ADAMTS16s		05p15.32	protein-coding gene	Q8TE57	0.0039012	0.013129	0.0039012	0	0	NA	NA|NA|NA	0	NA	NA|NA|NA	0	NA	NA|NA|NA	0	NA	NA|NA|NA	0	NA	NA|NA|NA	0	NA	NA	NA	NA	NA	NA	NA	NA	NA	NA	NA	NA	NA	NA	NA	NA	NA	NA	NA	NA
ADAMTS17	ADAM metallopeptidase with thrombospondin type 1 motif 17	170691	ENSG00000140470	HGNC:17109	FLJ32769|FLJ16363		15q26.3	protein-coding gene	Q8TE56	0.85521	0.7281	0.7281	0	0	NA	NA|NA|NA	0	NA	NA|NA|NA	0	NA	NA|NA|NA	0	NA	NA|NA|NA	0	NA	NA|NA|NA	0	NA	NA	NA	NA	NA	NA	NA	NA	NA	NA	NA	NA	NA	NA	NA	NA	NA	NA	NA	NA
ADAMTS18	ADAM metallopeptidase with thrombospondin type 1 motif 18	170692	ENSG00000140873	HGNC:17110		ADAMTS21	16q23.1	protein-coding gene	Q8TE60	0.81222	0.8003	0.8003	0	0	NA	NA|NA|NA	0	NA	NA|NA|NA	0	NA	NA|NA|NA	0	NA	NA|NA|NA	0	NA	NA|NA|NA	0	NA	NA	NA	NA	NA	NA	NA	NA	NA	NA	NA	NA	NA	NA	NA	NA	NA	NA	NA	NA
ADAMTS19	ADAM metallopeptidase with thrombospondin type 1 motif 19	171019	ENSG00000145808	HGNC:17111			05q23.3	protein-coding gene	Q8TE59	0.63914	0.52542	0.52542	0	0	NA	NA|NA|NA	0	NA	NA|NA|NA	0	NA	NA|NA|NA	0	NA	NA|NA|NA	0	NA	NA|NA|NA	0	NA	NA	NA	NA	NA	NA	NA	NA	NA	NA	NA	NA	NA	NA	NA	NA	NA	NA	NA	NA
ADAMTS2	ADAM metallopeptidase with thrombospondin type 1 motif 2	9509	ENSG00000087116	HGNC:218	ADAMTS-3|hPCPNI|PCINP|ADAM-TS2|NPI		05q35.3	protein-coding gene	O95450	0.85042	0.61026	0.61026	0	0	NA	NA|NA|NA	0	NA	NA|NA|NA	0	NA	NA|NA|NA	0	NA	NA|NA|NA	0	NA	NA|NA|NA	0	NA	NA	NA	NA	NA	NA	NA	NA	NA	NA	NA	NA	NA	NA	NA	NA	NA	NA	NA	NA
ADAMTS20	ADAM metallopeptidase with thrombospondin type 1 motif 20	80070	ENSG00000173157	HGNC:17178	GON-1		12q12	protein-coding gene	P59510	0.96878	0.8727	0.8727	0	0	NA	NA|NA|NA	0	NA	NA|NA|NA	0	NA	NA|NA|NA	0	NA	NA|NA|NA	0	NA	NA|NA|NA	0	NA	NA	NA	NA	NA	NA	NA	NA	NA	NA	NA	NA	NA	NA	NA	NA	NA	NA	NA	NA
ADAMTS7	ADAM metallopeptidase with thrombospondin type 1 motif 7	11173	ENSG00000136378	HGNC:223	ADAM-TS7|DKFZp434H204		15q25.1	protein-coding gene	Q9UKP4	0.37434	0.2812	0.2812	0	0	NA	NA|NA|NA	0	NA	NA|NA|NA	0	NA	NA|NA|NA	0	NA	NA|NA|NA	0	NA	NA|NA|NA	0	NA	NA	0	1	NA	NA	NA	NA	NA	0	NA	1	1	NA	NA	NA	NA	NA	NA	NA
ADAMTS9	ADAM metallopeptidase with thrombospondin type 1 motif 9	56999	ENSG00000163638	HGNC:13202	KIAA1312		03p14.1	protein-coding gene	Q9P2N4	0.44482	0.78443	0.44482	0	0	NA	NA|NA|NA	0	NA	NA|NA|NA	0	NA	NA|NA|NA	0	NA	NA|NA|NA	0	NA	NA|NA|NA	0	NA	NA	NA	NA	NA	NA	NA	NA	NA	NA	NA	NA	NA	NA	NA	NA	NA	NA	NA	NA
ADAMTSL4	ADAMTS like 4	54507	ENSG00000143382	HGNC:19706	DKFZP434K1772	TSRC1	01q21.2	protein-coding gene	Q6UY14	0.86555	0.15921	0.15921	0	0	NA	NA|NA|NA	0	NA	NA|NA|NA	0	NA	NA|NA|NA	0	NA	NA|NA|NA	0	NA	NA|NA|NA	0	NA	NA	NA	NA	NA	NA	NA	NA	NA	NA	NA	NA	NA	NA	NA	NA	NA	NA	NA	NA
ADAMTSL5	ADAMTS like 5	339366	ENSG00000185761	HGNC:27912		THSD6	19p13.3	protein-coding gene	Q6ZMM2	0.56348	0.26097	0.26097	0	0	NA	NA|NA|NA	0	NA	NA|NA|NA	0	NA	NA|NA|NA	0	NA	NA|NA|NA	0	NA	NA|NA|NA	0	NA	NA	NA	NA	NA	NA	NA	NA	NA	NA	NA	NA	NA	NA	NA	NA	NA	NA	NA	NA
ADAP1	ArfGAP with dual PH domains 1	11033	ENSG00000105963	HGNC:16486	GCS1L	CENTA1	07p22.3	protein-coding gene	O75689	0.085923	0.13989	0.085923	0	0	NA	NA|NA|NA	0	NA	NA|NA|NA	0	NA	NA|NA|NA	0	NA	NA|NA|NA	0	NA	NA|NA|NA	0	NA	NA	NA	NA	NA	NA	NA	NA	NA	NA	NA	NA	NA	NA	NA	NA	NA	NA	NA	NA
ADAP2	ArfGAP with dual PH domains 2	55803	ENSG00000184060	HGNC:16487		CENTA2	17q11.2	protein-coding gene	Q9NPF8	0.96721	0.98797	0.96721	0	0	NA	NA|NA|NA	0	NA	NA|NA|NA	0	NA	NA|NA|NA	0	NA	NA|NA|NA	0	NA	NA|NA|NA	0	NA	NA	NA	NA	NA	NA	NA	NA	NA	NA	NA	NA	NA	NA	NA	NA	NA	NA	NA	NA
ADAR	adenosine deaminase RNA specific	103	ENSG00000160710	HGNC:225	ADAR1	IFI4|G1P1	01q21.3	protein-coding gene	P55265	0.87588	0.92131	0.87588	0	0	NA	NA|NA|NA	0	NA	NA|NA|NA	0	NA	NA|NA|NA	0	NA	NA|NA|NA	0	NA	NA|NA|NA	0	NA	NA	NA	NA	NA	NA	NA	NA	NA	NA	NA	NA	NA	NA	NA	NA	NA	NA	NA	NA
ADARB1	adenosine deaminase RNA specific B1	104	ENSG00000197381	HGNC:226	ADAR2|DRADA2|ADAR2g|DRABA2|RED1|hRED1|ADAR2a-L1|ADAR2a-L2|ADAR2a-L3|ADAR2a|ADAR2b|ADAR2c|ADAR2d		21q22.3	protein-coding gene	P78563	0.94067	0.86463	0.86463	0	0	NA	NA|NA|NA	0	NA	NA|NA|NA	0	NA	NA|NA|NA	0	NA	NA|NA|NA	0	NA	NA|NA|NA	0	NA	NA	NA	NA	NA	NA	NA	NA	NA	NA	NA	NA	NA	NA	NA	NA	NA	NA	NA	NA
ADCK2	aarF domain containing kinase 2	90956	ENSG00000133597	HGNC:19039	MGC20727		07q34	protein-coding gene	Q7Z695	0.017025	0.093187	0.017025	0	0	NA	NA|NA|NA	0	NA	NA|NA|NA	0	NA	NA|NA|NA	0	NA	NA|NA|NA	0	NA	NA|NA|NA	0	NA	NA	NA	NA	NA	NA	NA	NA	NA	NA	NA	NA	NA	NA	NA	NA	NA	NA	NA	NA
ADCK5	aarF domain containing kinase 5	203054	ENSG00000173137	HGNC:21738	FLJ35454		08q24.3	protein-coding gene	Q3MIX3	0.41412	0.49069	0.41412	0	0	NA	NA|NA|NA	0	NA	NA|NA|NA	0	NA	NA|NA|NA	0	NA	NA|NA|NA	0	NA	NA|NA|NA	0	NA	NA	NA	NA	NA	NA	NA	NA	NA	NA	NA	NA	NA	NA	NA	NA	NA	NA	NA	NA
ADCY1	adenylate cyclase 1	107	ENSG00000164742	HGNC:232	AC1	DFNB44	07p12.3	protein-coding gene	Q08828	0.9593	0.87755	0.87755	0	0	NA	NA|NA|NA	0	NA	NA|NA|NA	0	NA	NA|NA|NA	0	NA	NA|NA|NA	0	NA	NA|NA|NA	0	NA	NA	NA	NA	NA	NA	NA	NA	NA	NA	NA	NA	NA	NA	NA	NA	NA	NA	NA	NA
ADCY3	adenylate cyclase 3	109	ENSG00000138031	HGNC:234	AC3		02p23.3	protein-coding gene	O60266	0.68401	0.22758	0.22758	0	0	NA	NA|NA|NA	0	NA	NA|NA|NA	0	NA	NA|NA|NA	0	NA	NA|NA|NA	0	NA	NA|NA|NA	0	NA	NA	NA	NA	NA	NA	NA	NA	NA	NA	NA	NA	NA	NA	NA	NA	NA	NA	NA	NA
ADCY4	adenylate cyclase 4	196883	ENSG00000129467	HGNC:235	AC4		14q12	protein-coding gene	Q8NFM4	0.83899	0.77047	0.77047	0	0	NA	NA|NA|NA	0	NA	NA|NA|NA	0	NA	NA|NA|NA	0	NA	NA|NA|NA	0	NA	NA|NA|NA	0	NA	NA	NA	NA	NA	NA	NA	NA	NA	NA	NA	NA	NA	NA	NA	NA	NA	NA	NA	NA
ADCY5	adenylate cyclase 5	111	ENSG00000173175	HGNC:236	AC5		03q21.1	protein-coding gene	O95622	0.098991	0.013122	0.013122	0	0	NA	NA|NA|NA	0	NA	NA|NA|NA	0	NA	NA|NA|NA	0	NA	NA|NA|NA	0	NA	NA|NA|NA	0	NA	NA	NA	NA	NA	NA	NA	NA	NA	NA	NA	NA	NA	NA	NA	NA	NA	NA	NA	NA
ADCY8	adenylate cyclase 8	114	ENSG00000155897	HGNC:239	HBAC1|AC8	ADCY3	08q24.22	protein-coding gene	P40145	0.67272	0.79691	0.67272	0	0	NA	NA|NA|NA	0	NA	NA|NA|NA	0	NA	NA|NA|NA	0	NA	NA|NA|NA	0	NA	NA|NA|NA	0	NA	NA	NA	NA	NA	NA	NA	NA	NA	NA	NA	NA	NA	NA	NA	NA	NA	NA	NA	NA
ADCYAP1	adenylate cyclase activating polypeptide 1	116	ENSG00000141433	HGNC:241	PACAP		18p11.32	protein-coding gene	P18509	0.77685	0.29993	0.29993	0	0	NA	NA|NA|NA	0	NA	NA|NA|NA	0	NA	NA|NA|NA	0	NA	NA|NA|NA	0	NA	NA|NA|NA	0	NA	NA	NA	NA	NA	NA	NA	NA	NA	NA	NA	NA	NA	NA	NA	NA	NA	NA	NA	NA
ADD2	adducin 2	119	ENSG00000075340	HGNC:244	ADDB		02p13.3	protein-coding gene	P35612	0.54143	0.77642	0.54143	0	0	NA	NA|NA|NA	0	NA	NA|NA|NA	0	NA	NA|NA|NA	0	NA	NA|NA|NA	0	NA	NA|NA|NA	0	NA	NA	NA	NA	NA	NA	NA	NA	NA	NA	NA	NA	NA	NA	NA	NA	NA	NA	NA	NA
ADD3	adducin 3	120	ENSG00000148700	HGNC:245		ADDL	10q25.1-q25.2	protein-coding gene	Q9UEY8	0.70191	0.42828	0.42828	0	0	NA	NA|NA|NA	0	NA	NA|NA|NA	0	NA	NA|NA|NA	0	NA	NA|NA|NA	0	NA	NA|NA|NA	0	NA	NA	NA	NA	NA	NA	NA	NA	NA	NA	NA	NA	NA	NA	NA	NA	NA	NA	NA	NA
ADGRA3	adhesion G protein-coupled receptor A3	166647	ENSG00000152990	HGNC:13839	FLJ38547|PGR21	GPR125	04p15.2	protein-coding gene	Q8IWK6	0.80665	0.8551	0.80665	0	0	NA	NA|NA|NA	0	NA	NA|NA|NA	0	NA	NA|NA|NA	0	NA	NA|NA|NA	0	NA	NA|NA|NA	0	NA	NA	NA	NA	NA	NA	NA	NA	NA	NA	NA	NA	NA	NA	NA	NA	NA	NA	NA	NA
ADGRB2	adhesion G protein-coupled receptor B2	576	ENSG00000121753	HGNC:944		BAI2	01p35.2	protein-coding gene	O60241	0.59696	0.34478	0.34478	0	0	NA	NA|NA|NA	0	NA	NA|NA|NA	0	NA	NA|NA|NA	0	NA	NA|NA|NA	0	NA	NA|NA|NA	0	NA	NA	NA	NA	NA	NA	NA	NA	NA	NA	NA	NA	NA	NA	NA	NA	NA	NA	NA	NA
ADGRB3	adhesion G protein-coupled receptor B3	577	ENSG00000135298	HGNC:945	KIAA0550	BAI3	06q12-q13	protein-coding gene	O60242	0.33572	0.30708	0.30708	0	0	NA	NA|NA|NA	0	NA	NA|NA|NA	0	NA	NA|NA|NA	0	NA	NA|NA|NA	0	NA	NA|NA|NA	0	NA	NA	NA	NA	NA	NA	NA	NA	NA	NA	NA	NA	NA	NA	NA	NA	NA	NA	NA	NA
ADGRD1	adhesion G protein-coupled receptor D1	283383	ENSG00000111452	HGNC:19893	DKFZp434B1272|PGR25	GPR133	12q24.33	protein-coding gene	Q6QNK2	0.61966	0.8509	0.61966	0	0	NA	NA|NA|NA	0	NA	NA|NA|NA	0	NA	NA|NA|NA	0	NA	NA|NA|NA	0	NA	NA|NA|NA	0	NA	NA	NA	NA	NA	NA	NA	NA	NA	NA	NA	NA	NA	NA	NA	NA	NA	NA	NA	NA
ADGRD2	adhesion G protein-coupled receptor D2	347088	ENSG00000180264	HGNC:18651	PGR24	GPR144	09q33.3	protein-coding gene	Q7Z7M1	0.66373	0.24493	0.24493	0	0	NA	NA|NA|NA	0	NA	NA|NA|NA	0	NA	NA|NA|NA	0	NA	NA|NA|NA	0	NA	NA|NA|NA	0	NA	NA	NA	NA	NA	NA	NA	NA	NA	NA	NA	NA	NA	NA	NA	NA	NA	NA	NA	NA
ADGRE1	adhesion G protein-coupled receptor E1	2015	ENSG00000174837	HGNC:3336		TM7LN3|EMR1	19p13.3-p13.2	protein-coding gene	Q14246	0.40893	0.81654	0.40893	0	0	NA	NA|NA|NA	0	NA	NA|NA|NA	0	NA	NA|NA|NA	0	NA	NA|NA|NA	0	NA	NA|NA|NA	0	NA	NA	NA	NA	NA	NA	NA	NA	NA	NA	NA	NA	NA	NA	NA	NA	NA	NA	NA	NA
ADGRE2	adhesion G protein-coupled receptor E2	30817	ENSG00000127507	HGNC:3337	CD312	EMR2	19p13.12	protein-coding gene	Q9UHX3	0.68401	0.97901	0.68401	0	0	NA	NA|NA|NA	0	NA	NA|NA|NA	0	NA	NA|NA|NA	0	NA	NA|NA|NA	0	NA	NA|NA|NA	0	NA	NA	NA	NA	NA	NA	NA	NA	NA	NA	NA	NA	NA	NA	NA	NA	NA	NA	NA	NA
ADGRE3	adhesion G protein-coupled receptor E3	84658	ENSG00000131355	HGNC:23647		EMR3	19p13.12	protein-coding gene	Q9BY15	0.97474	0.92951	0.92951	0	0	NA	NA|NA|NA	0	NA	NA|NA|NA	0	NA	NA|NA|NA	0	NA	NA|NA|NA	0	NA	NA|NA|NA	0	NA	NA	NA	NA	NA	NA	NA	NA	NA	NA	NA	NA	NA	NA	NA	NA	NA	NA	NA	NA
ADGRE5	adhesion G protein-coupled receptor E5	976	ENSG00000123146	HGNC:1711	TM7LN1	CD97	19p13.12	protein-coding gene	P48960	0.65149	0.51791	0.51791	0	0	NA	NA|NA|NA	0	NA	NA|NA|NA	0	NA	NA|NA|NA	0	NA	NA|NA|NA	0	NA	NA|NA|NA	0	NA	NA	NA	NA	NA	NA	NA	NA	NA	NA	NA	NA	NA	NA	NA	NA	NA	NA	NA	NA
ADGRF2	adhesion G protein-coupled receptor F2	222611	ENSG00000164393	HGNC:18991	hGPCR35|PGR20	GPR111	06p12.3	protein-coding gene	Q8IZF7	0.13082	0.33171	0.13082	0	0	NA	NA|NA|NA	0	NA	NA|NA|NA	0	NA	NA|NA|NA	0	NA	NA|NA|NA	0	NA	NA|NA|NA	0	NA	NA	NA	NA	NA	NA	NA	NA	NA	NA	NA	NA	NA	NA	NA	NA	NA	NA	NA	NA
ADGRF3	adhesion G protein-coupled receptor F3	165082	ENSG00000173567	HGNC:18989	hGPCR37|PGR23	GPR113	02p23.3	protein-coding gene	Q8IZF5	0.04943	0.053148	0.04943	0	0	NA	NA|NA|NA	0	NA	NA|NA|NA	0	NA	NA|NA|NA	0	NA	NA|NA|NA	0	NA	NA|NA|NA	0	NA	NA	NA	NA	NA	NA	NA	NA	NA	NA	NA	NA	NA	NA	NA	NA	NA	NA	NA	NA
ADGRF4	adhesion G protein-coupled receptor F4	221393	ENSG00000153294	HGNC:19011	FLJ38076|PGR18	GPR115	06p12.3	protein-coding gene	Q8IZF3	0.17949	0.32606	0.17949	0	0	NA	NA|NA|NA	0	NA	NA|NA|NA	0	NA	NA|NA|NA	0	NA	NA|NA|NA	0	NA	NA|NA|NA	0	NA	NA	NA	NA	NA	NA	NA	NA	NA	NA	NA	NA	NA	NA	NA	NA	NA	NA	NA	NA
ADGRG1	adhesion G protein-coupled receptor G1	9289	ENSG00000205336	HGNC:4512	TM7LN4|TM7XN1	GPR56	16q21	protein-coding gene	Q9Y653	0.22041	0.79584	0.22041	0	0	NA	NA|NA|NA	0	NA	NA|NA|NA	0	NA	NA|NA|NA	0	NA	NA|NA|NA	0	NA	NA|NA|NA	0	NA	NA	NA	NA	NA	NA	NA	NA	NA	NA	NA	NA	NA	NA	NA	NA	NA	NA	NA	NA
ADGRG3	adhesion G protein-coupled receptor G3	222487	ENSG00000182885	HGNC:13728	Pb99|PGR26	GPR97	16q21	protein-coding gene	Q86Y34	0.65002	0.51175	0.51175	0	0	NA	NA|NA|NA	0	NA	NA|NA|NA	0	NA	NA|NA|NA	0	NA	NA|NA|NA	0	NA	NA|NA|NA	0	NA	NA	NA	NA	NA	NA	NA	NA	NA	NA	NA	NA	NA	NA	NA	NA	NA	NA	NA	NA
ADGRG5	adhesion G protein-coupled receptor G5	221188	ENSG00000159618	HGNC:19010	PGR27	GPR114	16q21	protein-coding gene	Q8IZF4	0.82968	0.80235	0.80235	0	0	NA	NA|NA|NA	0	NA	NA|NA|NA	0	NA	NA|NA|NA	0	NA	NA|NA|NA	0	NA	NA|NA|NA	0	NA	NA	NA	NA	NA	NA	NA	NA	NA	NA	NA	NA	NA	NA	NA	NA	NA	NA	NA	NA
ADGRL2	adhesion G protein-coupled receptor L2	23266	ENSG00000117114	HGNC:18582	KIAA0786|LEC1|CIRL2	LPHH1|LPHN2	01p31.1	protein-coding gene	O95490	0.25216	0.21037	0.21037	0	0	NA	NA|NA|NA	0	NA	NA|NA|NA	0	NA	NA|NA|NA	0	NA	NA|NA|NA	0	NA	NA|NA|NA	0	NA	NA	NA	NA	NA	NA	NA	NA	NA	NA	NA	NA	NA	NA	NA	NA	NA	NA	NA	NA
ADGRL4	adhesion G protein-coupled receptor L4	64123	ENSG00000162618	HGNC:20822	ETL	ELTD1	01p31.1	protein-coding gene	Q9HBW9	0.19608	0.41999	0.19608	0	0	NA	NA|NA|NA	0	NA	NA|NA|NA	0	NA	NA|NA|NA	0	NA	NA|NA|NA	0	NA	NA|NA|NA	0	NA	NA	NA	NA	NA	NA	NA	NA	NA	NA	NA	NA	NA	NA	NA	NA	NA	NA	NA	NA
ADGRV1	adhesion G protein-coupled receptor V1	84059	ENSG00000164199	HGNC:17416	DKFZp761P0710|KIAA0686|FEB4|VLGR1	USH2C|MASS1|GPR98	05q14.3	protein-coding gene	Q8WXG9	0.7281	0.69948	0.69948	0	0	NA	NA|NA|NA	0	NA	NA|NA|NA	0	NA	NA|NA|NA	0	NA	NA|NA|NA	0	NA	NA|NA|NA	0	NA	NA	NA	NA	NA	NA	NA	NA	NA	NA	NA	NA	NA	NA	NA	NA	NA	NA	NA	NA
ADH1B	alcohol dehydrogenase 1B (class I), beta polypeptide	125	ENSG00000196616	HGNC:250		ADH2	04q23	protein-coding gene	P00325	0.58096	0.74263	0.58096	0	0	NA	NA|NA|NA	0	NA	NA|NA|NA	0	NA	NA|NA|NA	0	NA	NA|NA|NA	0	NA	NA|NA|NA	0	NA	NA	NA	NA	NA	NA	NA	NA	NA	NA	NA	NA	NA	NA	NA	NA	NA	NA	NA	NA
ADH4	alcohol dehydrogenase 4 (class II), pi polypeptide	127	ENSG00000198099	HGNC:252	ADH-2		04q23	protein-coding gene	P08319	0.4166	0.14186	0.14186	0	0	NA	NA|NA|NA	0	NA	NA|NA|NA	0	NA	NA|NA|NA	0	NA	NA|NA|NA	0	NA	NA|NA|NA	0	NA	NA	NA	NA	NA	NA	NA	NA	NA	NA	NA	NA	NA	NA	NA	NA	NA	NA	NA	NA
ADH6	alcohol dehydrogenase 6 (class V)	130	ENSG00000172955	HGNC:255	ADH-5		04q23	protein-coding gene	P28332	0.21095	0.24939	0.21095	0	0	NA	NA|NA|NA	0	NA	NA|NA|NA	0	NA	NA|NA|NA	0	NA	NA|NA|NA	0	NA	NA|NA|NA	0	NA	NA	NA	NA	NA	NA	NA	NA	NA	NA	NA	NA	NA	NA	NA	NA	NA	NA	NA	NA
ADH7	alcohol dehydrogenase 7 (class IV), mu or sigma polypeptide	131	ENSG00000196344	HGNC:256	ADH-4		04q23	protein-coding gene	P40394	0.42624	0.77181	0.42624	0	0	NA	NA|NA|NA	0	NA	NA|NA|NA	0	NA	NA|NA|NA	0	NA	NA|NA|NA	0	NA	NA|NA|NA	0	NA	NA	NA	NA	NA	NA	NA	NA	NA	NA	NA	NA	NA	NA	NA	NA	NA	NA	NA	NA
ADI1	acireductone dioxygenase 1	55256	ENSG00000182551	HGNC:30576	SIPL|MTCBP-1|ARD|APL1|FLJ10913|HMFT1638|mtnD		02p25.3	protein-coding gene	Q9BV57	0.42791	0.51207	0.42791	0	0	NA	NA|NA|NA	0	NA	NA|NA|NA	0	NA	NA|NA|NA	0	NA	NA|NA|NA	0	NA	NA|NA|NA	0	NA	NA	NA	NA	NA	NA	NA	NA	NA	NA	NA	NA	NA	NA	NA	NA	NA	NA	NA	NA
ADIG	adipogenin	149685	ENSG00000182035	HGNC:28606	MGC39724|SMAF1|RP5-1100H13.2		20q11.23	protein-coding gene	Q0VDE8	0.73618	0.6897	0.6897	0	0	NA	NA|NA|NA	0	NA	NA|NA|NA	0	NA	NA|NA|NA	0	NA	NA|NA|NA	0	NA	NA|NA|NA	0	NA	NA	NA	NA	NA	NA	NA	NA	NA	NA	NA	NA	NA	NA	NA	NA	NA	NA	NA	NA
ADM2	adrenomedullin 2	79924	ENSG00000128165	HGNC:28898	AM2|FLJ21135		22q13.33	protein-coding gene	Q7Z4H4	0.07045	0.7692	0.07045	0	0	NA	NA|NA|NA	0	NA	NA|NA|NA	0	NA	NA|NA|NA	0	NA	NA|NA|NA	0	NA	NA|NA|NA	0	NA	NA	NA	NA	NA	NA	NA	NA	NA	NA	NA	NA	NA	NA	NA	NA	NA	NA	NA	NA
ADNP	activity dependent neuroprotector homeobox	23394	ENSG00000101126	HGNC:15766	KIAA0784|ADNP1		20q13.13	protein-coding gene	Q9H2P0	0.52017	0.91269	0.52017	0	0	NA	NA|NA|NA	0	NA	NA|NA|NA	0	NA	NA|NA|NA	0	NA	NA|NA|NA	0	NA	NA|NA|NA	0	NA	NA	NA	NA	NA	NA	NA	NA	NA	NA	NA	NA	NA	NA	NA	NA	NA	NA	NA	NA
ADNP2	ADNP homeobox 2	22850	ENSG00000101544	HGNC:23803	KIAA0863	ZNF508	18q23	protein-coding gene	Q6IQ32	0.29395	0.55017	0.29395	0	0	NA	NA|NA|NA	0	NA	NA|NA|NA	0	NA	NA|NA|NA	0	NA	NA|NA|NA	0	NA	NA|NA|NA	0	NA	NA	NA	NA	NA	NA	NA	NA	NA	NA	NA	NA	NA	NA	NA	NA	NA	NA	NA	NA
ADO	2-aminoethanethiol dioxygenase	84890	ENSG00000181915	HGNC:23506	FLJ14547	C10orf22	10q21.3	protein-coding gene	Q96SZ5	0.94237	0.99163	0.94237	0	0	NA	NA|NA|NA	0	NA	NA|NA|NA	0	NA	NA|NA|NA	0	NA	NA|NA|NA	0	NA	NA|NA|NA	0	NA	NA	NA	NA	NA	NA	NA	NA	NA	NA	NA	NA	NA	NA	NA	NA	NA	NA	NA	NA
ADORA2B	adenosine A2b receptor	136	ENSG00000170425	HGNC:264			17p12	protein-coding gene	P29275	0.78859	0.33079	0.33079	0	0	NA	NA|NA|NA	0	NA	NA|NA|NA	0	NA	NA|NA|NA	0	NA	NA|NA|NA	0	NA	NA|NA|NA	0	NA	NA	NA	NA	NA	NA	NA	NA	NA	NA	NA	NA	NA	NA	NA	NA	NA	NA	NA	NA
ADORA3	adenosine A3 receptor	140	ENSG00000282608	HGNC:268	AD026|A3AR		01p13.2	protein-coding gene	P0DMS8	0.57078	0.67906	0.57078	0	0	NA	NA|NA|NA	0	NA	NA|NA|NA	0	NA	NA|NA|NA	0	NA	NA|NA|NA	0	NA	NA|NA|NA	0	NA	NA	NA	NA	NA	NA	NA	NA	NA	NA	NA	NA	NA	NA	NA	NA	NA	NA	NA	NA
ADPGK	ADP dependent glucokinase	83440	ENSG00000159322	HGNC:25250	DKFZp434B195|ADP-GK		15q24.1	protein-coding gene	Q9BRR6	0.0041708	0.010125	0.0041708	0	0	NA	NA|NA|NA	0	NA	NA|NA|NA	0	NA	NA|NA|NA	0	NA	NA|NA|NA	0	NA	NA|NA|NA	0	NA	NA	NA	NA	NA	NA	NA	NA	NA	NA	NA	NA	NA	NA	NA	NA	NA	NA	NA	NA
ADRA1A	adrenoceptor alpha 1A	148	ENSG00000120907	HGNC:277	ADRA1L1	ADRA1C	08p21.2	protein-coding gene	P35348	0.39206	0.72781	0.39206	0	0	NA	NA|NA|NA	0	NA	NA|NA|NA	0	NA	NA|NA|NA	0	NA	NA|NA|NA	0	NA	NA|NA|NA	0	NA	NA	NA	NA	NA	NA	NA	NA	NA	NA	NA	NA	NA	NA	NA	NA	NA	NA	NA	NA
ADRA1B	adrenoceptor alpha 1B	147	ENSG00000170214	HGNC:278			05q33.3	protein-coding gene	P35368	0.93831	0.28531	0.28531	0	0	NA	NA|NA|NA	0	NA	NA|NA|NA	0	NA	NA|NA|NA	0	NA	NA|NA|NA	0	NA	NA|NA|NA	0	NA	NA	NA	NA	NA	NA	NA	NA	NA	NA	NA	NA	NA	NA	NA	NA	NA	NA	NA	NA
ADRB1	adrenoceptor beta 1	153	ENSG00000043591	HGNC:285		ADRB1R	10q25.3	protein-coding gene	P08588	0.7799	0.46914	0.46914	0	0	NA	NA|NA|NA	0	NA	NA|NA|NA	0	NA	NA|NA|NA	0	NA	NA|NA|NA	0	NA	NA|NA|NA	0	NA	NA	NA	NA	NA	NA	NA	NA	NA	NA	NA	NA	NA	NA	NA	NA	NA	NA	NA	NA
ADRB2	adrenoceptor beta 2	154	ENSG00000169252	HGNC:286	ADRBR|BAR|B2AR	ADRB2R	05q32	protein-coding gene	P07550	0.69246	0.88857	0.69246	0	0	NA	NA|NA|NA	0	NA	NA|NA|NA	0	NA	NA|NA|NA	0	NA	NA|NA|NA	0	NA	NA|NA|NA	0	NA	NA	NA	NA	NA	NA	NA	NA	NA	NA	NA	NA	NA	NA	NA	NA	NA	NA	NA	NA
ADSS2	adenylosuccinate synthase 2	159	ENSG00000035687	HGNC:292		ADSS	01q44	protein-coding gene	P30520	0.1939	0.31256	0.1939	0	0	NA	NA|NA|NA	0	NA	NA|NA|NA	0	NA	NA|NA|NA	0	NA	NA|NA|NA	0	NA	NA|NA|NA	0	NA	NA	NA	NA	NA	NA	NA	NA	NA	NA	NA	NA	NA	NA	NA	NA	NA	NA	NA	NA
ADTRP	androgen dependent TFPI regulating protein	84830	ENSG00000111863	HGNC:21214	dJ413H6.1|AIG1L	C6orf105	06p24.1	protein-coding gene	Q96IZ2	0.93375	0.010867	0.010867	0	0	NA	NA|NA|NA	0	NA	NA|NA|NA	0	NA	NA|NA|NA	0	NA	NA|NA|NA	0	NA	NA|NA|NA	0	NA	NA	NA	NA	NA	NA	NA	NA	NA	NA	NA	NA	NA	NA	NA	NA	NA	NA	NA	NA
AFAP1	actin filament associated protein 1	60312	ENSG00000196526	HGNC:24017	AFAP-110|AFAP		04p16.1	protein-coding gene	Q8N556	0.60072	0.84526	0.60072	0	0	NA	NA|NA|NA	0	NA	NA|NA|NA	0	NA	NA|NA|NA	0	NA	NA|NA|NA	0	NA	NA|NA|NA	0	NA	NA	NA	NA	NA	NA	NA	NA	NA	NA	NA	NA	NA	NA	NA	NA	NA	NA	NA	NA
AFAP1L1	actin filament associated protein 1 like 1	134265	ENSG00000157510	HGNC:26714	FLJ36748		05q32	protein-coding gene	Q8TED9	0.052881	0.40566	0.052881	0	0	NA	NA|NA|NA	0	NA	NA|NA|NA	0	NA	NA|NA|NA	0	NA	NA|NA|NA	0	NA	NA|NA|NA	0	NA	NA	NA	NA	NA	NA	NA	NA	NA	NA	NA	NA	NA	NA	NA	NA	NA	NA	NA	NA
AFDN	afadin, adherens junction formation factor	4301	ENSG00000130396	HGNC:7137	AF-6|AF6	MLLT4	06q27	protein-coding gene	P55196	0.81931	0.76073	0.76073	0	0	NA	NA|NA|NA	0	NA	NA|NA|NA	0	NA	NA|NA|NA	0	NA	NA|NA|NA	0	NA	NA|NA|NA	0	NA	NA	NA	NA	NA	NA	NA	NA	NA	NA	NA	NA	NA	NA	NA	NA	NA	NA	NA	NA
AFF1	AF4/FMR2 family member 1	4299	ENSG00000172493	HGNC:7135	AF-4|AF4	PBM1|MLLT2	04q21.3-q22.1	protein-coding gene	P51825	0.087476	0.051655	0.051655	0	0	NA	NA|NA|NA	0	NA	NA|NA|NA	0	NA	NA|NA|NA	0	NA	NA|NA|NA	0	NA	NA|NA|NA	0	NA	NA	NA	NA	NA	NA	NA	NA	NA	NA	NA	NA	NA	NA	NA	NA	NA	NA	NA	NA
AFF4	AF4/FMR2 family member 4	27125	ENSG00000072364	HGNC:17869	AF5Q31|MCEF		05q31.1	protein-coding gene	Q9UHB7	0.11734	0.10194	0.10194	0	0	NA	NA|NA|NA	0	NA	NA|NA|NA	0	NA	NA|NA|NA	0	NA	NA|NA|NA	0	NA	NA|NA|NA	0	NA	NA	NA	NA	NA	NA	NA	NA	NA	NA	NA	NA	NA	NA	NA	NA	NA	NA	NA	NA
AGAP1	ArfGAP with GTPase domain, ankyrin repeat and PH domain 1	116987	ENSG00000157985	HGNC:16922	KIAA1099|GGAP1	CENTG2	02q37.2	protein-coding gene	Q9UPQ3	0.75451	0.58117	0.58117	0	0	NA	NA|NA|NA	0	NA	NA|NA|NA	0	NA	NA|NA|NA	0	NA	NA|NA|NA	0	NA	NA|NA|NA	0	NA	NA	NA	NA	NA	NA	NA	NA	NA	NA	NA	NA	NA	NA	NA	NA	NA	NA	NA	NA
AGAP11	ArfGAP with GTPase domain, ankyrin repeat and PH domain 11	119385	ENSG00000261011	HGNC:29421	KIAA1975		10q23.2	other	Q8TF27	0.89763	0.66152	0.66152	0	0	NA	NA|NA|NA	0	NA	NA|NA|NA	0	NA	NA|NA|NA	0	NA	NA|NA|NA	0	NA	NA|NA|NA	0	NA	NA	NA	NA	NA	NA	NA	NA	NA	NA	NA	NA	NA	NA	NA	NA	NA	NA	NA	NA
AGBL1	AGBL carboxypeptidase 1	123624	ENSG00000273540	HGNC:26504	FLJ32310|CCP4		15q25.3	protein-coding gene	Q96MI9	0.11393	0.12115	0.11393	0	0	NA	NA|NA|NA	0	NA	NA|NA|NA	0	NA	NA|NA|NA	0	NA	NA|NA|NA	0	NA	NA|NA|NA	0	NA	NA	NA	NA	NA	NA	NA	NA	NA	NA	NA	NA	NA	NA	NA	NA	NA	NA	NA	NA
AGBL2	AGBL carboxypeptidase 2	79841	ENSG00000165923	HGNC:26296	FLJ23598|CCP2		11p11.2	protein-coding gene	Q5U5Z8	0.60229	0.57242	0.57242	0	0	NA	NA|NA|NA	0	NA	NA|NA|NA	0	NA	NA|NA|NA	0	NA	NA|NA|NA	0	NA	NA|NA|NA	0	NA	NA	NA	NA	NA	NA	NA	NA	NA	NA	NA	NA	NA	NA	NA	NA	NA	NA	NA	NA
AGFG1	ArfGAP with FG repeats 1	3267	ENSG00000173744	HGNC:5175	RIP|RAB	HRB	02q36.3	protein-coding gene	P52594	0.32603	0.15058	0.15058	0	0	NA	NA|NA|NA	0	NA	NA|NA|NA	0	NA	NA|NA|NA	0	NA	NA|NA|NA	0	NA	NA|NA|NA	0	NA	NA	NA	NA	NA	NA	NA	NA	NA	NA	NA	NA	NA	NA	NA	NA	NA	NA	NA	NA
AGFG2	ArfGAP with FG repeats 2	3268	ENSG00000106351	HGNC:5177	RABR	HRBL	07q22.1	protein-coding gene	O95081	0.33419	0.61857	0.33419	0	0	NA	NA|NA|NA	0	NA	NA|NA|NA	0	NA	NA|NA|NA	0	NA	NA|NA|NA	0	NA	NA|NA|NA	0	NA	NA	NA	NA	NA	NA	NA	NA	NA	NA	NA	NA	NA	NA	NA	NA	NA	NA	NA	NA
AGL	amylo-alpha-1, 6-glucosidase, 4-alpha-glucanotransferase	178	ENSG00000162688	HGNC:321	GDE		01p21.2	protein-coding gene	P35573	0.089502	0.23009	0.089502	0	0	NA	NA|NA|NA	0	NA	NA|NA|NA	0	NA	NA|NA|NA	0	NA	NA|NA|NA	0	NA	NA|NA|NA	0	NA	NA	NA	NA	NA	NA	NA	NA	NA	NA	NA	NA	NA	NA	NA	NA	NA	NA	NA	NA
AGO1	argonaute RISC component 1	26523	ENSG00000092847	HGNC:3262	hAGO1	EIF2C1	01p34.3	protein-coding gene	Q9UL18	0.69149	0.86539	0.69149	0	0	NA	NA|NA|NA	0	NA	NA|NA|NA	0	NA	NA|NA|NA	0	NA	NA|NA|NA	0	NA	NA|NA|NA	0	NA	NA	NA	NA	NA	NA	NA	NA	NA	NA	NA	NA	NA	NA	NA	NA	NA	NA	NA	NA
AGO4	argonaute RISC component 4	192670	ENSG00000134698	HGNC:18424	hAGO4|KIAA1567|FLJ20033	EIF2C4	01p34.3	protein-coding gene	Q9HCK5	0.95417	0.90907	0.90907	0	0	NA	NA|NA|NA	0	NA	NA|NA|NA	0	NA	NA|NA|NA	0	NA	NA|NA|NA	0	NA	NA|NA|NA	0	NA	NA	NA	NA	NA	NA	NA	NA	NA	NA	NA	NA	NA	NA	NA	NA	NA	NA	NA	NA
AGPAT3	1-acylglycerol-3-phosphate O-acyltransferase 3	56894	ENSG00000160216	HGNC:326	LPAAT-gamma|LPAAT3		21q22.3	protein-coding gene	Q9NRZ7	0.84088	0.91808	0.84088	0	0	NA	NA|NA|NA	0	NA	NA|NA|NA	0	NA	NA|NA|NA	0	NA	NA|NA|NA	0	NA	NA|NA|NA	0	NA	NA	NA	NA	NA	NA	NA	NA	NA	NA	NA	NA	NA	NA	NA	NA	NA	NA	NA	NA
AGPAT5	1-acylglycerol-3-phosphate O-acyltransferase 5	55326	ENSG00000155189	HGNC:20886	FLJ11210|LPAAT-e|LPAAT-epsilon		08p23.1	protein-coding gene	Q9NUQ2	0.85001	0.8808	0.85001	0	0	NA	NA|NA|NA	0	NA	NA|NA|NA	0	NA	NA|NA|NA	0	NA	NA|NA|NA	0	NA	NA|NA|NA	0	NA	NA	NA	NA	NA	NA	NA	NA	NA	NA	NA	NA	NA	NA	NA	NA	NA	NA	NA	NA
AGPS	alkylglycerone phosphate synthase	8540	ENSG00000018510	HGNC:327	ADHAPS|ADAS|ALDHPSY|ADPS|ADAP-S		02q31.2	protein-coding gene	O00116	0.89433	0.84174	0.84174	0	0	NA	NA|NA|NA	0	NA	NA|NA|NA	0	NA	NA|NA|NA	0	NA	NA|NA|NA	0	NA	NA|NA|NA	0	NA	NA	NA	NA	NA	NA	NA	NA	NA	NA	NA	NA	NA	NA	NA	NA	NA	NA	NA	NA
AGTRAP	angiotensin II receptor associated protein	57085	ENSG00000177674	HGNC:13539	ATRAP		01p36.22	protein-coding gene	Q6RW13	0.79253	0.88767	0.79253	0	0	NA	NA|NA|NA	0	NA	NA|NA|NA	0	NA	NA|NA|NA	0	NA	NA|NA|NA	0	NA	NA|NA|NA	0	NA	NA	NA	NA	NA	NA	NA	NA	NA	NA	NA	NA	NA	NA	NA	NA	NA	NA	NA	NA
AHCTF1	AT-hook containing transcription factor 1	25909	ENSG00000153207	HGNC:24618	ELYS		01q44	protein-coding gene	Q8WYP5	0.7877	0.9046	0.7877	0	0	NA	NA|NA|NA	0	NA	NA|NA|NA	0	NA	NA|NA|NA	0	NA	NA|NA|NA	0	NA	NA|NA|NA	0	NA	NA	NA	NA	NA	NA	NA	NA	NA	NA	NA	NA	NA	NA	NA	NA	NA	NA	NA	NA
AHR	aryl hydrocarbon receptor	196	ENSG00000106546	HGNC:348	bHLHe76		07p21.1	protein-coding gene	P35869	0.31261	0.32035	0.31261	0	0	NA	NA|NA|NA	0	NA	NA|NA|NA	0	NA	NA|NA|NA	0	NA	NA|NA|NA	0	NA	NA|NA|NA	0	NA	NA	NA	NA	NA	NA	NA	NA	NA	NA	NA	NA	NA	NA	NA	NA	NA	NA	NA	NA
AHSA2P	activator of HSP90 ATPase homolog 2, pseudogene	130872	ENSG00000173209	HGNC:20437	DKFZp564C236|Hch1|AHA1	AHSA2	02p15	pseudogene	Q719I0	0.012016	0.079371	0.012016	0	0	NA	NA|NA|NA	0	NA	NA|NA|NA	0	NA	NA|NA|NA	0	NA	NA|NA|NA	0	NA	NA|NA|NA	0	NA	NA	NA	NA	NA	NA	NA	NA	NA	NA	NA	NA	NA	NA	NA	NA	NA	NA	NA	NA
AHSG	alpha 2-HS glycoprotein	197	ENSG00000145192	HGNC:349	FETUA|A2HS|HSGA		03q27.3	protein-coding gene	P02765	0.036144	0.02423	0.02423	0	0	NA	NA|NA|NA	0	NA	NA|NA|NA	0	NA	NA|NA|NA	0	NA	NA|NA|NA	0	NA	NA|NA|NA	0	NA	NA	NA	NA	NA	NA	NA	NA	NA	NA	NA	NA	NA	NA	NA	NA	NA	NA	NA	NA
AIDA	axin interactor, dorsalization associated	64853	ENSG00000186063	HGNC:25761	FLJ12806	C1orf80	01q41	protein-coding gene	Q96BJ3	0.032486	0.067554	0.032486	0	0	NA	NA|NA|NA	0	NA	NA|NA|NA	0	NA	NA|NA|NA	0	NA	NA|NA|NA	0	NA	NA|NA|NA	0	NA	NA	NA	NA	NA	NA	NA	NA	NA	NA	NA	NA	NA	NA	NA	NA	NA	NA	NA	NA
AIF1	allograft inflammatory factor 1	199	ENSG00000204472	HGNC:352	IRT-1|AIF-1|Em:AF129756.17|IBA1		06p21.33	protein-coding gene	P55008	0.47267	0.010577	0.010577	0	0	NA	NA|NA|NA	0	NA	NA|NA|NA	0	NA	NA|NA|NA	0	NA	NA|NA|NA	0	NA	NA|NA|NA	0	NA	NA	NA	NA	NA	NA	NA	NA	NA	NA	NA	NA	NA	NA	NA	NA	NA	NA	NA	NA
AIM2	absent in melanoma 2	9447	ENSG00000163568	HGNC:357	PYHIN4		01q23.1-q23.2	protein-coding gene	O14862	0.35121	0.19097	0.19097	0	0	NA	NA|NA|NA	0	NA	NA|NA|NA	0	NA	NA|NA|NA	0	NA	NA|NA|NA	0	NA	NA|NA|NA	0	NA	NA	NA	NA	NA	NA	NA	NA	NA	NA	NA	NA	NA	NA	NA	NA	NA	NA	NA	NA
AIMP1	aminoacyl tRNA synthetase complex interacting multifunctional protein 1	9255	ENSG00000164022	HGNC:10648	EMAPII|EMAP-2|p43	SCYE1	04q24	protein-coding gene	Q12904	0.13049	0.1832	0.13049	0	0	NA	NA|NA|NA	0	NA	NA|NA|NA	0	NA	NA|NA|NA	0	NA	NA|NA|NA	0	NA	NA|NA|NA	0	NA	NA	NA	NA	NA	NA	NA	NA	NA	NA	NA	NA	NA	NA	NA	NA	NA	NA	NA	NA
AIPL1	aryl hydrocarbon receptor interacting protein like 1	23746	ENSG00000129221	HGNC:359		LCA4	17p13.2	protein-coding gene	Q9NZN9	0.86865	0.99032	0.86865	0	0	NA	NA|NA|NA	0	NA	NA|NA|NA	0	NA	NA|NA|NA	0	NA	NA|NA|NA	0	NA	NA|NA|NA	0	NA	NA	NA	NA	NA	NA	NA	NA	NA	NA	NA	NA	NA	NA	NA	NA	NA	NA	NA	NA
AJUBA	ajuba LIM protein	84962	ENSG00000129474	HGNC:20250	MGC15563	JUB	14q11.2	protein-coding gene	Q96IF1	0.14283	0.1521	0.14283	0	0	NA	NA|NA|NA	0	NA	NA|NA|NA	0	NA	NA|NA|NA	0	NA	NA|NA|NA	0	NA	NA|NA|NA	0	NA	NA	NA	NA	NA	NA	NA	NA	NA	NA	NA	NA	NA	NA	NA	NA	NA	NA	NA	NA
AK2	adenylate kinase 2	204	ENSG00000004455	HGNC:362			01p35.1	protein-coding gene	P54819	0.41012	0.55776	0.41012	0	0	NA	NA|NA|NA	0	NA	NA|NA|NA	0	NA	NA|NA|NA	0	NA	NA|NA|NA	0	NA	NA|NA|NA	0	NA	NA	NA	NA	NA	NA	NA	NA	NA	NA	NA	NA	NA	NA	NA	NA	NA	NA	NA	NA
AK4	adenylate kinase 4	205	ENSG00000162433	HGNC:363		AK3|AK3L1	01p31.3	protein-coding gene	P27144	0.037869	0.087656	0.037869	0	0	NA	NA|NA|NA	0	NA	NA|NA|NA	0	NA	NA|NA|NA	0	NA	NA|NA|NA	0	NA	NA|NA|NA	0	NA	NA	NA	NA	NA	NA	NA	NA	NA	NA	NA	NA	NA	NA	NA	NA	NA	NA	NA	NA
AK5	adenylate kinase 5	26289	ENSG00000154027	HGNC:365			01p31.1	protein-coding gene	Q9Y6K8	0.11937	0.20126	0.11937	0	0	NA	NA|NA|NA	0	NA	NA|NA|NA	0	NA	NA|NA|NA	0	NA	NA|NA|NA	0	NA	NA|NA|NA	0	NA	NA	NA	NA	NA	NA	NA	NA	NA	NA	NA	NA	NA	NA	NA	NA	NA	NA	NA	NA
AK7	adenylate kinase 7	122481	ENSG00000140057	HGNC:20091	FLJ32864|FAP75|CFAP75		14q32.2	protein-coding gene	Q96M32	0.83478	0.52164	0.52164	0	0	NA	NA|NA|NA	0	NA	NA|NA|NA	0	NA	NA|NA|NA	0	NA	NA|NA|NA	0	NA	NA|NA|NA	0	NA	NA	NA	NA	NA	NA	NA	NA	NA	NA	NA	NA	NA	NA	NA	NA	NA	NA	NA	NA
AK9	adenylate kinase 9	221264	ENSG00000155085	HGNC:33814	FLJ42177|FLJ25791|dJ70A9.1|MGC26954	C6orf224|AKD2|C6orf199|AKD1	06q21	protein-coding gene	Q5TCS8	0.50354	0.5083	0.50354	0	0	NA	NA|NA|NA	0	NA	NA|NA|NA	0	NA	NA|NA|NA	0	NA	NA|NA|NA	0	NA	NA|NA|NA	0	NA	NA	NA	NA	NA	NA	NA	NA	NA	NA	NA	NA	NA	NA	NA	NA	NA	NA	NA	NA
AKAP1	A-kinase anchoring protein 1	8165	ENSG00000121057	HGNC:367	AKAP121|AKAP149|SAKAP84|S-AKAP84|AKAP84|D-AKAP1|PPP1R43|TDRD17	PRKA1	17q22	protein-coding gene	Q92667	0.59773	0.62149	0.59773	0	0	NA	NA|NA|NA	0	NA	NA|NA|NA	0	NA	NA|NA|NA	0	NA	NA|NA|NA	0	NA	NA|NA|NA	0	NA	NA	NA	NA	NA	NA	NA	NA	NA	NA	NA	NA	NA	NA	NA	NA	NA	NA	NA	NA
AKAP10	A-kinase anchoring protein 10	11216	ENSG00000108599	HGNC:368	D-AKAP2|PRKA10|MGC9414		17p11.2	protein-coding gene	O43572	0.11683	0.043125	0.043125	0	0	NA	NA|NA|NA	0	NA	NA|NA|NA	0	NA	NA|NA|NA	0	NA	NA|NA|NA	0	NA	NA|NA|NA	0	NA	NA	NA	NA	NA	NA	NA	NA	NA	NA	NA	NA	NA	NA	NA	NA	NA	NA	NA	NA
AKAP11	A-kinase anchoring protein 11	11215	ENSG00000023516	HGNC:369	KIAA0629|AKAP220|PRKA11|FLJ11304|DKFZp781I12161|PPP1R44		13q14.11	protein-coding gene	Q9UKA4	0.50649	0.90364	0.50649	0	0	NA	NA|NA|NA	0	NA	NA|NA|NA	0	NA	NA|NA|NA	0	NA	NA|NA|NA	0	NA	NA|NA|NA	0	NA	NA	NA	NA	NA	NA	NA	NA	NA	NA	NA	NA	NA	NA	NA	NA	NA	NA	NA	NA
AKAP13	A-kinase anchoring protein 13	11214	ENSG00000170776	HGNC:371	Ht31|BRX|AKAP-Lbc|c-lbc|PROTO-LB|HA-3|ARHGEF13	LBC	15q25.3	protein-coding gene	Q12802	0.71042	0.46708	0.46708	0	0	NA	NA|NA|NA	0	NA	NA|NA|NA	0	NA	NA|NA|NA	0	NA	NA|NA|NA	0	NA	NA|NA|NA	0	NA	NA	NA	NA	NA	NA	NA	NA	NA	NA	NA	NA	NA	NA	NA	NA	NA	NA	NA	NA
AKAP14	A-kinase anchoring protein 14	158798	ENSG00000186471	HGNC:24061	AKAP28		Xq24	protein-coding gene	Q86UN6	NA	NA	NA	NA	0	NA	NA|NA|NA	0	NA	NA|NA|NA	0	NA	NA|NA|NA	0	NA	NA|NA|NA	0	NA	NA|NA|NA	0	NA	NA	NA	NA	NA	NA	NA	NA	NA	NA	NA	NA	NA	NA	NA	NA	NA	NA	NA	NA
AKAP17A	A-kinase anchoring protein 17A	8227	ENSG00000197976	HGNC:18783	XE7|XE7Y|DXYS155E|MGC39904|721P|CCDC133	CXYorf3|SFRS17A	Xp22.33 and Yp11.32	protein-coding gene	Q02040	NA	NA	NA	NA	0	NA	NA|NA|NA	0	NA	NA|NA|NA	0	NA	NA|NA|NA	0	NA	NA|NA|NA	0	NA	NA|NA|NA	0	NA	NA	NA	NA	NA	NA	NA	NA	NA	NA	NA	NA	NA	NA	NA	NA	NA	NA	NA	NA
AKAP3	A-kinase anchoring protein 3	10566	ENSG00000111254	HGNC:373	FSP95|SOB1|AKAP110|CT82		12p13.32	protein-coding gene	O75969	0.084486	0.13565	0.084486	0	0	NA	NA|NA|NA	0	NA	NA|NA|NA	0	NA	NA|NA|NA	0	NA	NA|NA|NA	0	NA	NA|NA|NA	0	NA	NA	NA	NA	NA	NA	NA	NA	NA	NA	NA	NA	NA	NA	NA	NA	NA	NA	NA	NA
AKAP5	A-kinase anchoring protein 5	9495	ENSG00000179841	HGNC:375	AKAP75|AKAP79		14q23.3	protein-coding gene	P24588	0.71514	0.65114	0.65114	0	0	NA	NA|NA|NA	0	NA	NA|NA|NA	0	NA	NA|NA|NA	0	NA	NA|NA|NA	0	NA	NA|NA|NA	0	NA	NA	NA	NA	NA	NA	NA	NA	NA	NA	NA	NA	NA	NA	NA	NA	NA	NA	NA	NA
AKAP6	A-kinase anchoring protein 6	9472	ENSG00000151320	HGNC:376	KIAA0311|mAKAP|AKAP100|PRKA6|ADAP6		14q12	protein-coding gene	Q13023	0.88144	0.85094	0.85094	0	0	NA	NA|NA|NA	0	NA	NA|NA|NA	0	NA	NA|NA|NA	0	NA	NA|NA|NA	0	NA	NA|NA|NA	0	NA	NA	0	1	NA	NA	NA	NA	NA	0	NA	1	1	NA	NA	NA	NA	NA	NA	NA
AKIP1	A-kinase interacting protein 1	56672	ENSG00000166452	HGNC:1170	BCA3	C11orf17	11p15.4	protein-coding gene	Q9NQ31	0.36438	0.34823	0.34823	0	0	NA	NA|NA|NA	0	NA	NA|NA|NA	0	NA	NA|NA|NA	0	NA	NA|NA|NA	0	NA	NA|NA|NA	0	NA	NA	NA	NA	NA	NA	NA	NA	NA	NA	NA	NA	NA	NA	NA	NA	NA	NA	NA	NA
AKNAD1	AKNA domain containing 1	254268	ENSG00000162641	HGNC:28398	MGC26989	C1orf62	01p13.3	protein-coding gene	Q5T1N1	0.27093	0.19952	0.19952	0	0	NA	NA|NA|NA	0	NA	NA|NA|NA	0	NA	NA|NA|NA	0	NA	NA|NA|NA	0	NA	NA|NA|NA	0	NA	NA	NA	NA	NA	NA	NA	NA	NA	NA	NA	NA	NA	NA	NA	NA	NA	NA	NA	NA
AKR1A1	aldo-keto reductase family 1 member A1	10327	ENSG00000117448	HGNC:380	ALR|DD3		01p34.1	protein-coding gene	P14550	0.92077	0.76718	0.76718	0	0	NA	NA|NA|NA	0	NA	NA|NA|NA	0	NA	NA|NA|NA	0	NA	NA|NA|NA	0	NA	NA|NA|NA	0	NA	NA	NA	NA	NA	NA	NA	NA	NA	NA	NA	NA	NA	NA	NA	NA	NA	NA	NA	NA
AKR1B1	aldo-keto reductase family 1 member B	231	ENSG00000085662	HGNC:381	AR	ALDR1	07q33	protein-coding gene	P15121	0.53528	0.82977	0.53528	0	0	NA	NA|NA|NA	0	NA	NA|NA|NA	0	NA	NA|NA|NA	0	NA	NA|NA|NA	0	NA	NA|NA|NA	0	NA	NA	NA	NA	NA	NA	NA	NA	NA	NA	NA	NA	NA	NA	NA	NA	NA	NA	NA	NA
AKR1C3	aldo-keto reductase family 1 member C3	8644	ENSG00000196139	HGNC:386	KIAA0119|DDX|HAKRB|PGFS	HSD17B5	10p15.1	protein-coding gene	P42330	0.15388	0.37344	0.15388	0	0	NA	NA|NA|NA	0	NA	NA|NA|NA	0	NA	NA|NA|NA	0	NA	NA|NA|NA	0	NA	NA|NA|NA	0	NA	NA	NA	NA	NA	NA	NA	NA	NA	NA	NA	NA	NA	NA	NA	NA	NA	NA	NA	NA
AKR1E2	aldo-keto reductase family 1 member E2	83592	ENSG00000165568	HGNC:23437	MGC10612|HTSP1|htAKR	AKRDC1|AKR1CL2	10p15.1	protein-coding gene	Q96JD6	0.28098	0.47126	0.28098	0	0	NA	NA|NA|NA	0	NA	NA|NA|NA	0	NA	NA|NA|NA	0	NA	NA|NA|NA	0	NA	NA|NA|NA	0	NA	NA	NA	NA	NA	NA	NA	NA	NA	NA	NA	NA	NA	NA	NA	NA	NA	NA	NA	NA
AKR7A2	aldo-keto reductase family 7 member A2	8574	ENSG00000053371	HGNC:389	AFAR		01p36.13	protein-coding gene	O43488	0.36895	0.49408	0.36895	0	0	NA	NA|NA|NA	0	NA	NA|NA|NA	0	NA	NA|NA|NA	0	NA	NA|NA|NA	0	NA	NA|NA|NA	0	NA	NA	NA	NA	NA	NA	NA	NA	NA	NA	NA	NA	NA	NA	NA	NA	NA	NA	NA	NA
AKT2	AKT serine/threonine kinase 2	208	ENSG00000105221	HGNC:392	PKB√é¬≤		19q13.2	protein-coding gene	P31751	0.70874	0.88101	0.70874	0	0	NA	NA|NA|NA	0	NA	NA|NA|NA	0	NA	NA|NA|NA	0	NA	NA|NA|NA	0	NA	NA|NA|NA	0	NA	NA	NA	NA	NA	NA	NA	NA	NA	NA	NA	NA	NA	NA	NA	NA	NA	NA	NA	NA
AKT3	AKT serine/threonine kinase 3	10000	ENSG00000117020	HGNC:393	PKBG|RAC-gamma|PRKBG		01q43-q44	protein-coding gene	Q9Y243	0.93267	0.71183	0.71183	0	0	NA	NA|NA|NA	0	NA	NA|NA|NA	0	NA	NA|NA|NA	0	NA	NA|NA|NA	0	NA	NA|NA|NA	0	NA	NA	NA	NA	NA	NA	NA	NA	NA	NA	NA	NA	NA	NA	NA	NA	NA	NA	NA	NA
ALAD	aminolevulinate dehydratase	210	ENSG00000148218	HGNC:395	ALADH|PBGS		09q32	protein-coding gene	P13716	0.0066364	0.015317	0.0066364	0	0	NA	NA|NA|NA	0	NA	NA|NA|NA	0	NA	NA|NA|NA	0	NA	NA|NA|NA	0	NA	NA|NA|NA	0	NA	NA	NA	NA	NA	NA	NA	NA	NA	NA	NA	NA	NA	NA	NA	NA	NA	NA	NA	NA
ALAS1	5'-aminolevulinate synthase 1	211	ENSG00000023330	HGNC:396		ALAS3|ALAS	03p21.2	protein-coding gene	P13196	0.11945	0.20498	0.11945	0	0	NA	NA|NA|NA	0	NA	NA|NA|NA	0	NA	NA|NA|NA	0	NA	NA|NA|NA	0	NA	NA|NA|NA	0	NA	NA	0	1	NA	NA	NA	NA	NA	0	NA	1	1	NA	NA	NA	NA	NA	NA	NA
ALAS2	5'-aminolevulinate synthase 2	212	ENSG00000158578	HGNC:397		ASB	Xp11.21	protein-coding gene	P22557	NA	NA	NA	NA	0	NA	NA|NA|NA	0	NA	NA|NA|NA	0	NA	NA|NA|NA	0	NA	NA|NA|NA	0	NA	NA|NA|NA	0	NA	NA	NA	NA	NA	NA	NA	NA	NA	NA	NA	NA	NA	NA	NA	NA	NA	NA	NA	NA
ALB	albumin	213	ENSG00000163631	HGNC:399			04q13.3	protein-coding gene	P02768	0.85241	0.87798	0.85241	0	0	NA	NA|NA|NA	0	NA	NA|NA|NA	0	NA	NA|NA|NA	0	NA	NA|NA|NA	0	NA	NA|NA|NA	0	NA	NA	NA	NA	NA	NA	NA	NA	NA	NA	NA	NA	NA	NA	NA	NA	NA	NA	NA	NA
ALDH1L1	aldehyde dehydrogenase 1 family member L1	10840	ENSG00000144908	HGNC:3978	10-fTHF|FDH	FTHFD	03q21.3	protein-coding gene	O75891	0.30066	0.55823	0.30066	0	0	NA	NA|NA|NA	0	NA	NA|NA|NA	0	NA	NA|NA|NA	0	NA	NA|NA|NA	0	NA	NA|NA|NA	0	NA	NA	NA	NA	NA	NA	NA	NA	NA	NA	NA	NA	NA	NA	NA	NA	NA	NA	NA	NA
ALDH1L2	aldehyde dehydrogenase 1 family member L2	160428	ENSG00000136010	HGNC:26777	FLJ38508|mtFDH		12q23.3	protein-coding gene	Q3SY69	0.901	0.92144	0.901	0	0	NA	NA|NA|NA	0	NA	NA|NA|NA	0	NA	NA|NA|NA	0	NA	NA|NA|NA	0	NA	NA|NA|NA	0	NA	NA	NA	NA	NA	NA	NA	NA	NA	NA	NA	NA	NA	NA	NA	NA	NA	NA	NA	NA
ALDH3A2	aldehyde dehydrogenase 3 family member A2	224	ENSG00000072210	HGNC:403	FALDH	SLS|ALDH10	17p11.2	protein-coding gene	P51648	0.12555	0.20373	0.12555	0	0	NA	NA|NA|NA	0	NA	NA|NA|NA	0	NA	NA|NA|NA	0	NA	NA|NA|NA	0	NA	NA|NA|NA	0	NA	NA	NA	NA	NA	NA	NA	NA	NA	NA	NA	NA	NA	NA	NA	NA	NA	NA	NA	NA
ALDH3B1	aldehyde dehydrogenase 3 family member B1	221	ENSG00000006534	HGNC:410		ALDH7	11q13.2	protein-coding gene	P43353	0.8837	0.86156	0.86156	0	0	NA	NA|NA|NA	0	NA	NA|NA|NA	0	NA	NA|NA|NA	0	NA	NA|NA|NA	0	NA	NA|NA|NA	0	NA	NA	NA	NA	NA	NA	NA	NA	NA	NA	NA	NA	NA	NA	NA	NA	NA	NA	NA	NA
ALDH9A1	aldehyde dehydrogenase 9 family member A1	223	ENSG00000143149	HGNC:412	E3	ALDH7|ALDH4|ALDH9	01q24.1	protein-coding gene	P49189	0.40812	0.38509	0.38509	0	0	NA	NA|NA|NA	0	NA	NA|NA|NA	0	NA	NA|NA|NA	0	NA	NA|NA|NA	0	NA	NA|NA|NA	0	NA	NA	NA	NA	NA	NA	NA	NA	NA	NA	NA	NA	NA	NA	NA	NA	NA	NA	NA	NA
ALDOB	aldolase, fructose-bisphosphate B	229	ENSG00000136872	HGNC:417			09q31.1	protein-coding gene	P05062	0.47069	0.60246	0.47069	0	0	NA	NA|NA|NA	0	NA	NA|NA|NA	0	NA	NA|NA|NA	0	NA	NA|NA|NA	0	NA	NA|NA|NA	0	NA	NA	NA	NA	NA	NA	NA	NA	NA	NA	NA	NA	NA	NA	NA	NA	NA	NA	NA	NA
ALDOC	aldolase, fructose-bisphosphate C	230	ENSG00000109107	HGNC:418			17q11.2	protein-coding gene	P09972	0.1218	0.38783	0.1218	0	0	NA	NA|NA|NA	0	NA	NA|NA|NA	0	NA	NA|NA|NA	0	NA	NA|NA|NA	0	NA	NA|NA|NA	0	NA	NA	NA	NA	NA	NA	NA	NA	NA	NA	NA	NA	NA	NA	NA	NA	NA	NA	NA	NA
ALG11	ALG11 alpha-1,2-mannosyltransferase	440138	ENSG00000253710	HGNC:32456	KIAA0266|CDG1P		13q14.3	protein-coding gene	Q2TAA5	0.65675	0.86009	0.65675	0	0	NA	NA|NA|NA	0	NA	NA|NA|NA	0	NA	NA|NA|NA	0	NA	NA|NA|NA	0	NA	NA|NA|NA	0	NA	NA	NA	NA	NA	NA	NA	NA	NA	NA	NA	NA	NA	NA	NA	NA	NA	NA	NA	NA
ALG13	ALG13 UDP-N-acetylglucosaminyltransferase subunit	79868	ENSG00000101901	HGNC:30881	MDS031|YGL047W|FLJ23018|TDRD13|CDG1S	GLT28D1|CXorf45	Xq23	protein-coding gene	Q9NP73	NA	NA	NA	NA	0	NA	NA|NA|NA	0	NA	NA|NA|NA	0	NA	NA|NA|NA	0	NA	NA|NA|NA	0	NA	NA|NA|NA	0	NA	NA	NA	NA	NA	NA	NA	NA	NA	NA	NA	NA	NA	NA	NA	NA	NA	NA	NA	NA
ALG8	ALG8 alpha-1,3-glucosyltransferase	79053	ENSG00000159063	HGNC:23161	MGC2840		11q14.1	protein-coding gene	Q9BVK2	0.90627	0.97973	0.90627	0	0	NA	NA|NA|NA	0	NA	NA|NA|NA	0	NA	NA|NA|NA	0	NA	NA|NA|NA	0	NA	NA|NA|NA	0	NA	NA	NA	NA	NA	NA	NA	NA	NA	NA	NA	NA	NA	NA	NA	NA	NA	NA	NA	NA
ALKAL2	ALK and LTK ligand 2	285016	ENSG00000189292	HGNC:27683	AUGA	FAM150B	02p25.3	protein-coding gene	Q6UX46	0.64104	0.68625	0.64104	0	0	NA	NA|NA|NA	0	NA	NA|NA|NA	0	NA	NA|NA|NA	0	NA	NA|NA|NA	0	NA	NA|NA|NA	0	NA	NA	NA	NA	NA	NA	NA	NA	NA	NA	NA	NA	NA	NA	NA	NA	NA	NA	NA	NA
ALKBH2	alkB homolog 2, alpha-ketoglutarate dependent dioxygenase	121642	ENSG00000189046	HGNC:32487	MGC90512|ABH2		12q24.11	protein-coding gene	Q6NS38	0.99365	0.82218	0.82218	0	0	NA	NA|NA|NA	0	NA	NA|NA|NA	0	NA	NA|NA|NA	0	NA	NA|NA|NA	0	NA	NA|NA|NA	0	NA	NA	NA	NA	NA	NA	NA	NA	NA	NA	NA	NA	NA	NA	NA	NA	NA	NA	NA	NA
ALKBH7	alkB homolog 7	84266	ENSG00000125652	HGNC:21306	MGC10974	SPATA11	19p13.3	protein-coding gene	Q9BT30	0.45043	0.6631	0.45043	0	0	NA	NA|NA|NA	0	NA	NA|NA|NA	0	NA	NA|NA|NA	0	NA	NA|NA|NA	0	NA	NA|NA|NA	0	NA	NA	NA	NA	NA	NA	NA	NA	NA	NA	NA	NA	NA	NA	NA	NA	NA	NA	NA	NA
ALLC	allantoicase	55821	ENSG00000151360	HGNC:17377	ALC		02p25.3	protein-coding gene	Q8N6M5	0.81169	0.74945	0.74945	0	0	NA	NA|NA|NA	0	NA	NA|NA|NA	0	NA	NA|NA|NA	0	NA	NA|NA|NA	0	NA	NA|NA|NA	0	NA	NA	NA	NA	NA	NA	NA	NA	NA	NA	NA	NA	NA	NA	NA	NA	NA	NA	NA	NA
ALMS1	ALMS1 centrosome and basal body associated protein	7840	ENSG00000116127	HGNC:428	KIAA0328		02p13.1	protein-coding gene	Q8TCU4	0.68033	0.66365	0.66365	0	0	NA	NA|NA|NA	0	NA	NA|NA|NA	0	NA	NA|NA|NA	0	NA	NA|NA|NA	0	NA	NA|NA|NA	0	NA	NA	NA	NA	NA	NA	NA	NA	NA	NA	NA	NA	NA	NA	NA	NA	NA	NA	NA	NA
ALOX12B	arachidonate 12-lipoxygenase, 12R type	242	ENSG00000179477	HGNC:430	12R-LOX		17p13.1	protein-coding gene	O75342	0.64639	0.087609	0.087609	0	0	NA	NA|NA|NA	0	NA	NA|NA|NA	0	NA	NA|NA|NA	0	NA	NA|NA|NA	0	NA	NA|NA|NA	0	NA	NA	NA	NA	NA	NA	NA	NA	NA	NA	NA	NA	NA	NA	NA	NA	NA	NA	NA	NA
ALOX15B	arachidonate 15-lipoxygenase type B	247	ENSG00000179593	HGNC:434	15-LOX-2		17p13.1	protein-coding gene	O15296	0.60253	0.083143	0.083143	0	0	NA	NA|NA|NA	0	NA	NA|NA|NA	0	NA	NA|NA|NA	0	NA	NA|NA|NA	0	NA	NA|NA|NA	0	NA	NA	NA	NA	NA	NA	NA	NA	NA	NA	NA	NA	NA	NA	NA	NA	NA	NA	NA	NA
ALOX5	arachidonate 5-lipoxygenase	240	ENSG00000012779	HGNC:435	5-LOX		10q11.21	protein-coding gene	P09917	0.35887	0.59252	0.35887	0	0	NA	NA|NA|NA	0	NA	NA|NA|NA	0	NA	NA|NA|NA	0	NA	NA|NA|NA	0	NA	NA|NA|NA	0	NA	NA	NA	NA	NA	NA	NA	NA	NA	NA	NA	NA	NA	NA	NA	NA	NA	NA	NA	NA
ALOX5AP	arachidonate 5-lipoxygenase activating protein	241	ENSG00000132965	HGNC:436	FLAP		13q12.3	protein-coding gene	P20292	0.76285	0.97917	0.76285	0	0	NA	NA|NA|NA	0	NA	NA|NA|NA	0	NA	NA|NA|NA	0	NA	NA|NA|NA	0	NA	NA|NA|NA	0	NA	NA	NA	NA	NA	NA	NA	NA	NA	NA	NA	NA	NA	NA	NA	NA	NA	NA	NA	NA
ALOXE3	arachidonate lipoxygenase 3	59344	ENSG00000179148	HGNC:13743	eLOX3|E-LOX		17p13.1	protein-coding gene	Q9BYJ1	0.18174	0.55214	0.18174	0	0	NA	NA|NA|NA	0	NA	NA|NA|NA	0	NA	NA|NA|NA	0	NA	NA|NA|NA	0	NA	NA|NA|NA	0	NA	NA	NA	NA	NA	NA	NA	NA	NA	NA	NA	NA	NA	NA	NA	NA	NA	NA	NA	NA
ALPI	alkaline phosphatase, intestinal	248	ENSG00000163295	HGNC:437	IAP		02q37.1	protein-coding gene	P09923	0.68493	0.79423	0.68493	0	0	NA	NA|NA|NA	0	NA	NA|NA|NA	0	NA	NA|NA|NA	0	NA	NA|NA|NA	0	NA	NA|NA|NA	0	NA	NA	NA	NA	NA	NA	NA	NA	NA	NA	NA	NA	NA	NA	NA	NA	NA	NA	NA	NA
ALPK1	alpha kinase 1	80216	ENSG00000073331	HGNC:20917	Lak|FLJ22670|KIAA1527		04q25	protein-coding gene	Q96QP1	0.44775	0.31049	0.31049	0	0	NA	NA|NA|NA	0	NA	NA|NA|NA	0	NA	NA|NA|NA	0	NA	NA|NA|NA	0	NA	NA|NA|NA	0	NA	NA	NA	NA	NA	NA	NA	NA	NA	NA	NA	NA	NA	NA	NA	NA	NA	NA	NA	NA
ALPL	alkaline phosphatase, biomineralization associated	249	ENSG00000162551	HGNC:438	TNSALP|TNALP|TNAP	HOPS	01p36.12	protein-coding gene	P05186	0.6935	0.29746	0.29746	0	0	NA	NA|NA|NA	0	NA	NA|NA|NA	0	NA	NA|NA|NA	0	NA	NA|NA|NA	0	NA	NA|NA|NA	0	NA	NA	NA	NA	NA	NA	NA	NA	NA	NA	NA	NA	NA	NA	NA	NA	NA	NA	NA	NA
ALS2CL	ALS2 C-terminal like	259173	ENSG00000178038	HGNC:20605	FLJ36525|RN49018|DKFZp686I0110		03p21.31	protein-coding gene	Q60I27	0.053879	0.048327	0.048327	0	0	NA	NA|NA|NA	0	NA	NA|NA|NA	0	NA	NA|NA|NA	0	NA	NA|NA|NA	0	NA	NA|NA|NA	0	NA	NA	NA	NA	NA	NA	NA	NA	NA	NA	NA	NA	NA	NA	NA	NA	NA	NA	NA	NA
AMACR	alpha-methylacyl-CoA racemase	23600	ENSG00000242110	HGNC:451	RACE|P504S		05p13.2	protein-coding gene	Q9UHK6	0.62197	0.66007	0.62197	0	0	NA	NA|NA|NA	0	NA	NA|NA|NA	0	NA	NA|NA|NA	0	NA	NA|NA|NA	0	NA	NA|NA|NA	0	NA	NA	NA	NA	NA	NA	NA	NA	NA	NA	NA	NA	NA	NA	NA	NA	NA	NA	NA	NA
AMBRA1	autophagy and beclin 1 regulator 1	55626	ENSG00000110497	HGNC:25990	FLJ20294|KIAA1736|WDR94|DCAF3		11p11.2	protein-coding gene	Q9C0C7	0.76098	0.67676	0.67676	0	0	NA	NA|NA|NA	0	NA	NA|NA|NA	0	NA	NA|NA|NA	0	NA	NA|NA|NA	0	NA	NA|NA|NA	0	NA	NA	NA	NA	NA	NA	NA	NA	NA	NA	NA	NA	NA	NA	NA	NA	NA	NA	NA	NA
AMD1	adenosylmethionine decarboxylase 1	262	ENSG00000123505	HGNC:457	SAMDC		06q21	protein-coding gene	P17707	0.281	0.16988	0.16988	0	0	NA	NA|NA|NA	0	NA	NA|NA|NA	0	NA	NA|NA|NA	0	NA	NA|NA|NA	0	NA	NA|NA|NA	0	NA	NA	NA	NA	NA	NA	NA	NA	NA	NA	NA	NA	NA	NA	NA	NA	NA	NA	NA	NA
AMDHD2	amidohydrolase domain containing 2	51005	ENSG00000162066	HGNC:24262	CGI-14		16p13.3	protein-coding gene	Q9Y303	NA	0.6984	0.6984	0	0	NA	NA|NA|NA	0	NA	NA|NA|NA	0	NA	NA|NA|NA	0	NA	NA|NA|NA	0	NA	NA|NA|NA	0	NA	NA	NA	NA	NA	NA	NA	NA	NA	NA	NA	NA	NA	NA	NA	NA	NA	NA	NA	NA
AMFR	autocrine motility factor receptor	267	ENSG00000159461	HGNC:463	RNF45|gp78		16q13	protein-coding gene	Q9UKV5	0.2759	0.39042	0.2759	0	0	NA	NA|NA|NA	0	NA	NA|NA|NA	0	NA	NA|NA|NA	0	NA	NA|NA|NA	0	NA	NA|NA|NA	0	NA	NA	NA	NA	NA	NA	NA	NA	NA	NA	NA	NA	NA	NA	NA	NA	NA	NA	NA	NA
AMIGO3	adhesion molecule with Ig like domain 3	386724	ENSG00000176020	HGNC:24075			03p21.31	protein-coding gene	Q86WK7	0.2508	0.031769	0.031769	0	0	NA	NA|NA|NA	0	NA	NA|NA|NA	0	NA	NA|NA|NA	0	NA	NA|NA|NA	0	NA	NA|NA|NA	0	NA	NA	NA	NA	NA	NA	NA	NA	NA	NA	NA	NA	NA	NA	NA	NA	NA	NA	NA	NA
AMMECR1	AMMECR nuclear protein 1	9949	ENSG00000101935	HGNC:467			Xq23	protein-coding gene	Q9Y4X0	NA	NA	NA	NA	0	NA	NA|NA|NA	0	NA	NA|NA|NA	0	NA	NA|NA|NA	0	NA	NA|NA|NA	0	NA	NA|NA|NA	0	NA	NA	NA	NA	NA	NA	NA	NA	NA	NA	NA	NA	NA	NA	NA	NA	NA	NA	NA	NA
AMN	amnion associated transmembrane protein	81693	ENSG00000166126	HGNC:14604	amnionless		14q32.32	protein-coding gene	Q9BXJ7	0.55152	0.46373	0.46373	0	0	NA	NA|NA|NA	0	NA	NA|NA|NA	0	NA	NA|NA|NA	0	NA	NA|NA|NA	0	NA	NA|NA|NA	0	NA	NA	NA	NA	NA	NA	NA	NA	NA	NA	NA	NA	NA	NA	NA	NA	NA	NA	NA	NA
AMOT	angiomotin	154796	ENSG00000126016	HGNC:17810	KIAA1071		Xq23	protein-coding gene	Q4VCS5	NA	NA	NA	NA	0	NA	NA|NA|NA	0	NA	NA|NA|NA	0	NA	NA|NA|NA	0	NA	NA|NA|NA	0	NA	NA|NA|NA	0	NA	NA	NA	NA	NA	NA	NA	NA	NA	NA	NA	NA	NA	NA	NA	NA	NA	NA	NA	NA
AMOTL2	angiomotin like 2	51421	ENSG00000114019	HGNC:17812	LCCP		03q22.2	protein-coding gene	Q9Y2J4	0.88581	0.43759	0.43759	0	0	NA	NA|NA|NA	0	NA	NA|NA|NA	0	NA	NA|NA|NA	0	NA	NA|NA|NA	0	NA	NA|NA|NA	0	NA	NA	NA	NA	NA	NA	NA	NA	NA	NA	NA	NA	NA	NA	NA	NA	NA	NA	NA	NA
AMPD1	adenosine monophosphate deaminase 1	270	ENSG00000116748	HGNC:468	MAD|MADA		01p13.2	protein-coding gene	P23109	0.95532	0.79028	0.79028	0	0	NA	NA|NA|NA	0	NA	NA|NA|NA	0	NA	NA|NA|NA	0	NA	NA|NA|NA	0	NA	NA|NA|NA	0	NA	NA	NA	NA	NA	NA	NA	NA	NA	NA	NA	NA	NA	NA	NA	NA	NA	NA	NA	NA
AMPD3	adenosine monophosphate deaminase 3	272	ENSG00000133805	HGNC:470			11p15.4	protein-coding gene	Q01432	0.82301	0.52817	0.52817	0	0	NA	NA|NA|NA	0	NA	NA|NA|NA	0	NA	NA|NA|NA	0	NA	NA|NA|NA	0	NA	NA|NA|NA	0	NA	NA	NA	NA	NA	NA	NA	NA	NA	NA	NA	NA	NA	NA	NA	NA	NA	NA	NA	NA
AMPH	amphiphysin	273	ENSG00000078053	HGNC:471			07p14.1	protein-coding gene	P49418	0.0017812	0.0055668	0.0017812	0	0	NA	NA|NA|NA	0	NA	NA|NA|NA	0	NA	NA|NA|NA	0	NA	NA|NA|NA	0	NA	NA|NA|NA	0	NA	NA	NA	NA	NA	NA	NA	NA	NA	NA	NA	NA	NA	NA	NA	NA	NA	NA	NA	NA
AMT	aminomethyltransferase	275	ENSG00000145020	HGNC:473	GCST|NKH		03p21.31	protein-coding gene	P48728	0.015824	0.024764	0.015824	0	0	NA	NA|NA|NA	0	NA	NA|NA|NA	0	NA	NA|NA|NA	0	NA	NA|NA|NA	0	NA	NA|NA|NA	0	NA	NA	NA	NA	NA	NA	NA	NA	NA	NA	NA	NA	NA	NA	NA	NA	NA	NA	NA	NA
AMY2B	amylase alpha 2B	280	ENSG00000240038	HGNC:478		AMY2	01p21.1	protein-coding gene	P19961	0.90554	0.8846	0.8846	0	0	NA	NA|NA|NA	0	NA	NA|NA|NA	0	NA	NA|NA|NA	0	NA	NA|NA|NA	0	NA	NA|NA|NA	0	NA	NA	NA	NA	NA	NA	NA	NA	NA	NA	NA	NA	NA	NA	NA	NA	NA	NA	NA	NA
ANAPC1	anaphase promoting complex subunit 1	64682	ENSG00000153107	HGNC:19988	MCPR|TSG24|APC1		02q13	protein-coding gene	Q9H1A4	0.97573	0.38957	0.38957	0	0	NA	NA|NA|NA	0	NA	NA|NA|NA	0	NA	NA|NA|NA	0	NA	NA|NA|NA	0	NA	NA|NA|NA	0	NA	NA	NA	NA	NA	NA	NA	NA	NA	NA	NA	NA	NA	NA	NA	NA	NA	NA	NA	NA
ANAPC10	anaphase promoting complex subunit 10	10393	ENSG00000164162	HGNC:24077	APC10|DOC1|DKFZP564L0562		04q31.21	protein-coding gene	Q9UM13	0.83234	0.91586	0.83234	0	0	NA	NA|NA|NA	0	NA	NA|NA|NA	0	NA	NA|NA|NA	0	NA	NA|NA|NA	0	NA	NA|NA|NA	0	NA	NA	NA	NA	NA	NA	NA	NA	NA	NA	NA	NA	NA	NA	NA	NA	NA	NA	NA	NA
ANAPC11	anaphase promoting complex subunit 11	51529	ENSG00000141552	HGNC:14452	HSPC214|APC11|Apc11p|MGC882		17q25.3	protein-coding gene	Q9NYG5	NA	0.97972	0.97972	0	0	NA	NA|NA|NA	0	NA	NA|NA|NA	0	NA	NA|NA|NA	0	NA	NA|NA|NA	0	NA	NA|NA|NA	0	NA	NA	NA	NA	NA	NA	NA	NA	NA	NA	NA	NA	NA	NA	NA	NA	NA	NA	NA	NA
ANAPC5	anaphase promoting complex subunit 5	51433	ENSG00000089053	HGNC:15713	APC5		12q24.31	protein-coding gene	Q9UJX4	0.79086	0.19003	0.19003	0	0	NA	NA|NA|NA	0	NA	NA|NA|NA	0	NA	NA|NA|NA	0	NA	NA|NA|NA	0	NA	NA|NA|NA	0	NA	NA	0	1	NA	NA	NA	NA	NA	0	NA	1	1	NA	NA	NA	NA	NA	NA	NA
ANGEL1	angel homolog 1	23357	ENSG00000013523	HGNC:19961	Ccr4e	KIAA0759	14q24.3	protein-coding gene	Q9UNK9	0.98381	0.12567	0.12567	0	0	NA	NA|NA|NA	0	NA	NA|NA|NA	0	NA	NA|NA|NA	0	NA	NA|NA|NA	0	NA	NA|NA|NA	0	NA	NA	NA	NA	NA	NA	NA	NA	NA	NA	NA	NA	NA	NA	NA	NA	NA	NA	NA	NA
ANGEL2	angel homolog 2	90806	ENSG00000174606	HGNC:30534	KIAA0759L|FLJ12793|Ccr4d		01q32.3	protein-coding gene	Q5VTE6	0.93154	0.52801	0.52801	0	0	NA	NA|NA|NA	0	NA	NA|NA|NA	0	NA	NA|NA|NA	0	NA	NA|NA|NA	0	NA	NA|NA|NA	0	NA	NA	NA	NA	NA	NA	NA	NA	NA	NA	NA	NA	NA	NA	NA	NA	NA	NA	NA	NA
ANGPT2	angiopoietin 2	285	ENSG00000091879	HGNC:485	Ang2		08p23.1	protein-coding gene	O15123	0.75273	0.083555	0.083555	0	0	NA	NA|NA|NA	0	NA	NA|NA|NA	0	NA	NA|NA|NA	0	NA	NA|NA|NA	0	NA	NA|NA|NA	0	NA	NA	NA	NA	NA	NA	NA	NA	NA	NA	NA	NA	NA	NA	NA	NA	NA	NA	NA	NA
ANGPTL1	angiopoietin like 1	9068	ENSG00000116194	HGNC:489	ANG3|AngY|ARP1	ANGPT3	01q25.2	protein-coding gene	O95841	0.093677	0.16735	0.093677	0	0	NA	NA|NA|NA	0	NA	NA|NA|NA	0	NA	NA|NA|NA	0	NA	NA|NA|NA	0	NA	NA|NA|NA	0	NA	NA	NA	NA	NA	NA	NA	NA	NA	NA	NA	NA	NA	NA	NA	NA	NA	NA	NA	NA
ANGPTL4	angiopoietin like 4	51129	ENSG00000167772	HGNC:16039	pp1158|PGAR|ARP4|HFARP|FIAF|NL2		19p13.2	protein-coding gene	Q9BY76	0.099224	0.16013	0.099224	0	0	NA	NA|NA|NA	0	NA	NA|NA|NA	0	NA	NA|NA|NA	0	NA	NA|NA|NA	0	NA	NA|NA|NA	0	NA	NA	NA	NA	NA	NA	NA	NA	NA	NA	NA	NA	NA	NA	NA	NA	NA	NA	NA	NA
ANK1	ankyrin 1	286	ENSG00000029534	HGNC:492	SPH1	ANK	08p11.21	protein-coding gene	P16157	0.014628	0.017967	0.014628	0	0	NA	NA|NA|NA	0	NA	NA|NA|NA	0	NA	NA|NA|NA	0	NA	NA|NA|NA	0	NA	NA|NA|NA	0	NA	NA	NA	NA	NA	NA	NA	NA	NA	NA	NA	NA	NA	NA	NA	NA	NA	NA	NA	NA
ANK2	ankyrin 2	287	ENSG00000145362	HGNC:493	FAP87|CFAP87	LQT4	04q25-q26	protein-coding gene	Q01484	0.33756	0.35105	0.33756	0	0	NA	NA|NA|NA	0	NA	NA|NA|NA	0	NA	NA|NA|NA	0	NA	NA|NA|NA	0	NA	NA|NA|NA	0	NA	NA	NA	NA	NA	NA	NA	NA	NA	NA	NA	NA	NA	NA	NA	NA	NA	NA	NA	NA
ANKEF1	ankyrin repeat and EF-hand domain containing 1	63926	ENSG00000132623	HGNC:15803	FLJ21669|dJ839B4.6	ANKRD5	20p12.2	protein-coding gene	Q9NU02	0.81566	0.95912	0.81566	0	0	NA	NA|NA|NA	0	NA	NA|NA|NA	0	NA	NA|NA|NA	0	NA	NA|NA|NA	0	NA	NA|NA|NA	0	NA	NA	NA	NA	NA	NA	NA	NA	NA	NA	NA	NA	NA	NA	NA	NA	NA	NA	NA	NA
ANKFY1	ankyrin repeat and FYVE domain containing 1	51479	ENSG00000185722	HGNC:20763	ANKHZN|KIAA1255|ZFYVE14|BTBD23|RANK-5		17p13.2	protein-coding gene	Q9P2R3	0.87861	0.83424	0.83424	0	0	NA	NA|NA|NA	0	NA	NA|NA|NA	0	NA	NA|NA|NA	0	NA	NA|NA|NA	0	NA	NA|NA|NA	0	NA	NA	NA	NA	NA	NA	NA	NA	NA	NA	NA	NA	NA	NA	NA	NA	NA	NA	NA	NA
ANKH	ANKH inorganic pyrophosphate transport regulator	56172	ENSG00000154122	HGNC:15492	HANK|ANK|CPPDD|SLC62A1	CCAL2|CMDJ	05p15.2	protein-coding gene	Q9HCJ1	0.32643	0.33334	0.32643	0	0	NA	NA|NA|NA	0	NA	NA|NA|NA	0	NA	NA|NA|NA	0	NA	NA|NA|NA	0	NA	NA|NA|NA	0	NA	NA	NA	NA	NA	NA	NA	NA	NA	NA	NA	NA	NA	NA	NA	NA	NA	NA	NA	NA
ANKHD1	ankyrin repeat and KH domain containing 1	54882	ENSG00000131503	HGNC:24714	MASK|FLJ20288|FLJ11979|FLJ10042|FLJ14127|KIAA1085|MASK1		05q31.3	protein-coding gene	Q8IWZ3	0.16167	0.055095	0.055095	0	0	NA	NA|NA|NA	0	NA	NA|NA|NA	0	NA	NA|NA|NA	0	NA	NA|NA|NA	0	NA	NA|NA|NA	0	NA	NA	NA	NA	NA	NA	NA	NA	NA	NA	NA	NA	NA	NA	NA	NA	NA	NA	NA	NA
ANKHD1-EIF4EBP3	ANKHD1-EIF4EBP3 readthrough	404734	ENSG00000254996	HGNC:33530	MASK-BP3		05q31.3	other		0.1612	0.06861	0.06861	0	0	NA	NA|NA|NA	0	NA	NA|NA|NA	0	NA	NA|NA|NA	0	NA	NA|NA|NA	0	NA	NA|NA|NA	0	NA	NA	NA	NA	NA	NA	NA	NA	NA	NA	NA	NA	NA	NA	NA	NA	NA	NA	NA	NA
ANKIB1	ankyrin repeat and IBR domain containing 1	54467	ENSG00000001629	HGNC:22215	DKFZP434A0225|KIAA1386		07q21.2	protein-coding gene	Q9P2G1	0.45286	0.38956	0.38956	0	0	NA	NA|NA|NA	0	NA	NA|NA|NA	0	NA	NA|NA|NA	0	NA	NA|NA|NA	0	NA	NA|NA|NA	0	NA	NA	NA	NA	NA	NA	NA	NA	NA	NA	NA	NA	NA	NA	NA	NA	NA	NA	NA	NA
ANKMY1	ankyrin repeat and MYND domain containing 1	51281	ENSG00000144504	HGNC:20987	FLJ20499|ZMYND13		02q37.3	protein-coding gene	Q9P2S6	0.93997	0.96375	0.93997	0	0	NA	NA|NA|NA	0	NA	NA|NA|NA	0	NA	NA|NA|NA	0	NA	NA|NA|NA	0	NA	NA|NA|NA	0	NA	NA	NA	NA	NA	NA	NA	NA	NA	NA	NA	NA	NA	NA	NA	NA	NA	NA	NA	NA
ANKRA2	ankyrin repeat family A member 2	57763	ENSG00000164331	HGNC:13208			05q13.2	protein-coding gene	Q9H9E1	0.82442	0.79206	0.79206	0	0	NA	NA|NA|NA	0	NA	NA|NA|NA	0	NA	NA|NA|NA	0	NA	NA|NA|NA	0	NA	NA|NA|NA	0	NA	NA	NA	NA	NA	NA	NA	NA	NA	NA	NA	NA	NA	NA	NA	NA	NA	NA	NA	NA
ANKRD11	ankyrin repeat domain containing 11	29123	ENSG00000167522	HGNC:21316	LZ16|T13|ANCO1|ANCO-1		16q24.3	protein-coding gene	Q6UB99	0.085795	0.11266	0.085795	0	0	NA	NA|NA|NA	0	NA	NA|NA|NA	0	NA	NA|NA|NA	0	NA	NA|NA|NA	0	NA	NA|NA|NA	0	NA	NA	NA	NA	NA	NA	NA	NA	NA	NA	NA	NA	NA	NA	NA	NA	NA	0	1	NA
ANKRD12	ankyrin repeat domain 12	23253	ENSG00000101745	HGNC:29135	KIAA0874|FLJ20053|GAC-1|ANCO-2		18p11.22	protein-coding gene	Q6UB98	0.023989	0.028489	0.023989	0	0	NA	NA|NA|NA	0	NA	NA|NA|NA	0	NA	NA|NA|NA	0	NA	NA|NA|NA	0	NA	NA|NA|NA	0	NA	NA	NA	NA	NA	NA	NA	NA	NA	NA	NA	NA	NA	NA	NA	NA	NA	NA	NA	NA
ANKRD13A	ankyrin repeat domain 13A	88455	ENSG00000076513	HGNC:21268	NY-REN-25	ANKRD13	12q24.11	protein-coding gene	Q8IZ07	0.070577	0.11873	0.070577	0	0	NA	NA|NA|NA	0	NA	NA|NA|NA	0	NA	NA|NA|NA	0	NA	NA|NA|NA	0	NA	NA|NA|NA	0	NA	NA	NA	NA	NA	NA	NA	NA	NA	NA	NA	NA	NA	NA	NA	NA	NA	NA	NA	NA
ANKRD13B	ankyrin repeat domain 13B	124930	ENSG00000198720	HGNC:26363	FLJ25555		17q11.2	protein-coding gene	Q86YJ7	0.66297	0.73431	0.66297	0	0	NA	NA|NA|NA	0	NA	NA|NA|NA	0	NA	NA|NA|NA	0	NA	NA|NA|NA	0	NA	NA|NA|NA	0	NA	NA	NA	NA	NA	NA	NA	NA	NA	NA	NA	NA	NA	NA	NA	NA	NA	NA	NA	NA
ANKRD13C	ankyrin repeat domain 13C	81573	ENSG00000118454	HGNC:25374	DKFZP566D1346|dJ677H15.3		01p31.1	protein-coding gene	Q8N6S4	0.2447	0.59419	0.2447	0	0	NA	NA|NA|NA	0	NA	NA|NA|NA	0	NA	NA|NA|NA	0	NA	NA|NA|NA	0	NA	NA|NA|NA	0	NA	NA	NA	NA	NA	NA	NA	NA	NA	NA	NA	NA	NA	NA	NA	NA	NA	NA	NA	NA
ANKRD16	ankyrin repeat domain 16	54522	ENSG00000134461	HGNC:23471	DKFZP434N1511		10p15.1	protein-coding gene	Q6P6B7	0.22695	0.20807	0.20807	0	0	NA	NA|NA|NA	0	NA	NA|NA|NA	0	NA	NA|NA|NA	0	NA	NA|NA|NA	0	NA	NA|NA|NA	0	NA	NA	NA	NA	NA	NA	NA	NA	NA	NA	NA	NA	NA	NA	NA	NA	NA	NA	NA	NA
ANKRD17	ankyrin repeat domain 17	26057	ENSG00000132466	HGNC:23575	GTAR|KIAA0697|FLJ22206|NY-BR-16|MASK2		04q13.3	protein-coding gene	O75179	0.69982	0.77751	0.69982	0	0	NA	NA|NA|NA	0	NA	NA|NA|NA	0	NA	NA|NA|NA	0	NA	NA|NA|NA	0	NA	NA|NA|NA	0	NA	NA	NA	NA	NA	NA	NA	NA	NA	NA	NA	NA	NA	NA	NA	NA	NA	NA	NA	NA
ANKRD20A12P	ankyrin repeat domain 20 family member A12, pseudogene	100874392		HGNC:43603			4	pseudogene	Q8NF67	NA	NA	NA	NA	0	NA	NA|NA|NA	0	NA	NA|NA|NA	0	NA	NA|NA|NA	0	NA	NA|NA|NA	0	NA	NA|NA|NA	0	NA	NA	NA	NA	NA	NA	NA	NA	NA	NA	NA	NA	NA	NA	NA	NA	NA	NA	NA	NA
ANKRD20A5P	ankyrin repeat domain 20 family member A5, pseudogene	440482	ENSG00000186481	HGNC:33833	MGC26718	ANKRD20A5	18p11.21	pseudogene	A0PJZ0	NA	NA	NA	NA	0	NA	NA|NA|NA	0	NA	NA|NA|NA	0	NA	NA|NA|NA	0	NA	NA|NA|NA	0	NA	NA|NA|NA	0	NA	NA	NA	NA	NA	NA	NA	NA	NA	NA	NA	NA	NA	NA	NA	NA	NA	NA	NA	NA
ANKRD22	ankyrin repeat domain 22	118932	ENSG00000152766	HGNC:28321	MGC22805		10q23.31	protein-coding gene	Q5VYY1	0.9304	0.8264	0.8264	0	0	NA	NA|NA|NA	0	NA	NA|NA|NA	0	NA	NA|NA|NA	0	NA	NA|NA|NA	0	NA	NA|NA|NA	0	NA	NA	NA	NA	NA	NA	NA	NA	NA	NA	NA	NA	NA	NA	NA	NA	NA	NA	NA	NA
ANKRD23	ankyrin repeat domain 23	200539	ENSG00000163126	HGNC:24470	DARP|FLJ32449|MARP3		02q11.2	protein-coding gene	Q86SG2	0.91355	0.99131	0.91355	0	0	NA	NA|NA|NA	0	NA	NA|NA|NA	0	NA	NA|NA|NA	0	NA	NA|NA|NA	0	NA	NA|NA|NA	0	NA	NA	NA	NA	NA	NA	NA	NA	NA	NA	NA	NA	NA	NA	NA	NA	NA	NA	NA	NA
ANKRD26P1	ankyrin repeat domain 26 pseudogene 1	124149	ENSG00000261239	HGNC:32955	FLJ43980		16q11.2	pseudogene	Q6NSI1	NA	NA	NA	NA	0	NA	NA|NA|NA	0	NA	NA|NA|NA	0	NA	NA|NA|NA	0	NA	NA|NA|NA	0	NA	NA|NA|NA	0	NA	NA	NA	NA	NA	NA	NA	NA	NA	NA	NA	NA	NA	NA	NA	NA	NA	NA	NA	NA
ANKRD29	ankyrin repeat domain 29	147463	ENSG00000154065	HGNC:27110	FLJ25053		18q11.2	protein-coding gene	Q8N6D5	0.88559	0.63848	0.63848	0	0	NA	NA|NA|NA	0	NA	NA|NA|NA	0	NA	NA|NA|NA	0	NA	NA|NA|NA	0	NA	NA|NA|NA	0	NA	NA	NA	NA	NA	NA	NA	NA	NA	NA	NA	NA	NA	NA	NA	NA	NA	NA	NA	NA
ANKRD30A	ankyrin repeat domain 30A	91074	ENSG00000148513	HGNC:17234	NY-BR-1		10p11.21	protein-coding gene	Q9BXX3	0.15079	0.17625	0.15079	0	0	NA	NA|NA|NA	0	NA	NA|NA|NA	0	NA	NA|NA|NA	0	NA	NA|NA|NA	0	NA	NA|NA|NA	0	NA	NA	NA	NA	NA	NA	NA	NA	NA	NA	NA	NA	NA	NA	NA	NA	NA	NA	NA	NA
ANKRD30B	ankyrin repeat domain 30B	374860	ENSG00000180777	HGNC:24165	NY-BR-1.1		18p11.21	protein-coding gene	Q9BXX2	0.4577	0.54869	0.4577	0	0	NA	NA|NA|NA	0	NA	NA|NA|NA	0	NA	NA|NA|NA	0	NA	NA|NA|NA	0	NA	NA|NA|NA	0	NA	NA	NA	NA	NA	NA	NA	NA	NA	NA	NA	NA	NA	NA	NA	NA	NA	NA	NA	NA
ANKRD34A	ankyrin repeat domain 34A	284615	ENSG00000272031	HGNC:27639		ANKRD34	01q21.1	protein-coding gene	Q69YU3	0.35106	0.016074	0.016074	0	0	NA	NA|NA|NA	0	NA	NA|NA|NA	0	NA	NA|NA|NA	0	NA	NA|NA|NA	0	NA	NA|NA|NA	0	NA	NA	NA	NA	NA	NA	NA	NA	NA	NA	NA	NA	NA	NA	NA	NA	NA	NA	NA	NA
ANKRD35	ankyrin repeat domain 35	148741	ENSG00000198483	HGNC:26323	FLJ25124		01q21.1	protein-coding gene	Q8N283	0.010064	0.0016066	0.0016066	0	0	NA	NA|NA|NA	0	NA	NA|NA|NA	0	NA	NA|NA|NA	0	NA	NA|NA|NA	0	NA	NA|NA|NA	0	NA	NA	NA	NA	NA	NA	NA	NA	NA	NA	NA	NA	NA	NA	NA	NA	NA	NA	NA	NA
ANKRD36B	ankyrin repeat domain 36B	57730	ENSG00000196912	HGNC:29333	FLJ21281	KIAA1641	02q11.2	protein-coding gene	Q8N2N9	0.47998	0.57925	0.47998	0	0	NA	NA|NA|NA	0	NA	NA|NA|NA	0	NA	NA|NA|NA	0	NA	NA|NA|NA	0	NA	NA|NA|NA	0	NA	NA	NA	NA	NA	NA	NA	NA	NA	NA	NA	NA	NA	NA	NA	NA	NA	NA	NA	NA
ANKRD36BP1	ankyrin repeat domain 36B pseudogene 1	84832	ENSG00000214262	HGNC:28169	MGC12538	ANKRD26L1|ANKRD36BL1	01q24.2	pseudogene	Q96IX9	NA	NA	NA	NA	0	NA	NA|NA|NA	0	NA	NA|NA|NA	0	NA	NA|NA|NA	0	NA	NA|NA|NA	0	NA	NA|NA|NA	0	NA	NA	NA	NA	NA	NA	NA	NA	NA	NA	NA	NA	NA	NA	NA	NA	NA	NA	NA	NA
ANKRD37	ankyrin repeat domain 37	353322	ENSG00000186352	HGNC:29593	Lrp2bp		04q35.1	protein-coding gene	Q7Z713	0.817	0.72058	0.72058	0	0	NA	NA|NA|NA	0	NA	NA|NA|NA	0	NA	NA|NA|NA	0	NA	NA|NA|NA	0	NA	NA|NA|NA	0	NA	NA	NA	NA	NA	NA	NA	NA	NA	NA	NA	NA	NA	NA	NA	NA	NA	NA	NA	NA
ANKRD40CL	ANKRD40 C-terminal like	55018	ENSG00000167117	HGNC:26080	FLJ20694	C17orf73|LINC00483	17q21.33	protein-coding gene	Q53H64	NA	NA	NA	NA	0	NA	NA|NA|NA	0	NA	NA|NA|NA	0	NA	NA|NA|NA	0	NA	NA|NA|NA	0	NA	NA|NA|NA	0	NA	NA	NA	NA	NA	NA	NA	NA	NA	NA	NA	NA	NA	NA	NA	NA	NA	NA	NA	NA
ANKRD44	ankyrin repeat domain 44	91526	ENSG00000065413	HGNC:25259	PP6-ARS-B		02q33.1	protein-coding gene	Q8N8A2	0.21225	0.23469	0.21225	0	0	NA	NA|NA|NA	0	NA	NA|NA|NA	0	NA	NA|NA|NA	0	NA	NA|NA|NA	0	NA	NA|NA|NA	0	NA	NA	0	1	NA	NA	NA	NA	NA	0	NA	1	1	NA	NA	NA	NA	NA	NA	NA
ANKRD50	ankyrin repeat domain containing 50	57182	ENSG00000151458	HGNC:29223	KIAA1223		04q28.1	protein-coding gene	Q9ULJ7	0.83549	0.45727	0.45727	0	0	NA	NA|NA|NA	0	NA	NA|NA|NA	0	NA	NA|NA|NA	0	NA	NA|NA|NA	0	NA	NA|NA|NA	0	NA	NA	NA	NA	NA	NA	NA	NA	NA	NA	NA	NA	NA	NA	NA	NA	NA	NA	NA	NA
ANKRD53	ankyrin repeat domain 53	79998	ENSG00000144031	HGNC:25691	FLJ12056|FLJ36160		02p13.3	protein-coding gene	Q8N9V6	0.027675	0.30399	0.027675	0	0	NA	NA|NA|NA	0	NA	NA|NA|NA	0	NA	NA|NA|NA	0	NA	NA|NA|NA	0	NA	NA|NA|NA	0	NA	NA	NA	NA	NA	NA	NA	NA	NA	NA	NA	NA	NA	NA	NA	NA	NA	NA	NA	NA
ANKRD6	ankyrin repeat domain 6	22881	ENSG00000135299	HGNC:17280	KIAA0957		06q15	protein-coding gene	Q9Y2G4	0.015031	0.013816	0.013816	0	0	NA	NA|NA|NA	0	NA	NA|NA|NA	0	NA	NA|NA|NA	0	NA	NA|NA|NA	0	NA	NA|NA|NA	0	NA	NA	NA	NA	NA	NA	NA	NA	NA	NA	NA	NA	NA	NA	NA	NA	NA	NA	NA	NA
ANKRD60	ankyrin repeat domain 60	140731	ENSG00000124227	HGNC:16217	bA196N14.3	C20orf86	20q13.32	protein-coding gene	Q9BZ19	0.7167	0.32487	0.32487	0	0	NA	NA|NA|NA	0	NA	NA|NA|NA	0	NA	NA|NA|NA	0	NA	NA|NA|NA	0	NA	NA|NA|NA	0	NA	NA	NA	NA	NA	NA	NA	NA	NA	NA	NA	NA	NA	NA	NA	NA	NA	NA	NA	NA
ANKRD7	ankyrin repeat domain 7	56311	ENSG00000106013	HGNC:18588	TSA806		07q31.31	protein-coding gene	Q92527	0.67415	0.39191	0.39191	0	0	NA	NA|NA|NA	0	NA	NA|NA|NA	0	NA	NA|NA|NA	0	NA	NA|NA|NA	0	NA	NA|NA|NA	0	NA	NA	NA	NA	NA	NA	NA	NA	NA	NA	NA	NA	NA	NA	NA	NA	NA	NA	NA	NA
ANKRD9	ankyrin repeat domain 9	122416	ENSG00000156381	HGNC:20096			14q32.31	protein-coding gene	Q96BM1	0.67158	0.87389	0.67158	0	0	NA	NA|NA|NA	0	NA	NA|NA|NA	0	NA	NA|NA|NA	0	NA	NA|NA|NA	0	NA	NA|NA|NA	0	NA	NA	NA	NA	NA	NA	NA	NA	NA	NA	NA	NA	NA	NA	NA	NA	NA	NA	NA	NA
ANKS3	ankyrin repeat and sterile alpha motif domain containing 3	124401	ENSG00000168096	HGNC:29422	KIAA1977|FLJ32345|FLJ32767		16p13.3	protein-coding gene	Q6ZW76	0.62482	0.87998	0.62482	0	0	NA	NA|NA|NA	0	NA	NA|NA|NA	0	NA	NA|NA|NA	0	NA	NA|NA|NA	0	NA	NA|NA|NA	0	NA	NA	NA	NA	NA	NA	NA	NA	NA	NA	NA	NA	NA	NA	NA	NA	NA	NA	NA	NA
ANKS4B	ankyrin repeat and sterile alpha motif domain containing 4B	257629	ENSG00000175311	HGNC:26795	FLJ38819|HARP		16p12.2	protein-coding gene	Q8N8V4	0.30463	0.71212	0.30463	0	0	NA	NA|NA|NA	0	NA	NA|NA|NA	0	NA	NA|NA|NA	0	NA	NA|NA|NA	0	NA	NA|NA|NA	0	NA	NA	NA	NA	NA	NA	NA	NA	NA	NA	NA	NA	NA	NA	NA	NA	NA	NA	NA	NA
ANKS6	ankyrin repeat and sterile alpha motif domain containing 6	203286	ENSG00000165138	HGNC:26724	FLJ36928|NPHP16	SAMD6|ANKRD14	09q22.33	protein-coding gene	Q68DC2	0.83841	0.78556	0.78556	0	0	NA	NA|NA|NA	0	NA	NA|NA|NA	0	NA	NA|NA|NA	0	NA	NA|NA|NA	0	NA	NA|NA|NA	0	NA	NA	NA	NA	NA	NA	NA	NA	NA	NA	NA	NA	NA	NA	NA	NA	NA	NA	NA	NA
ANKUB1	ankyrin repeat and ubiquitin domain containing 1	389161	ENSG00000206199	HGNC:29642		C3orf16	03q25.1	protein-coding gene	A6NFN9	0.12193	0.15561	0.12193	0	0	NA	NA|NA|NA	0	NA	NA|NA|NA	0	NA	NA|NA|NA	0	NA	NA|NA|NA	0	NA	NA|NA|NA	0	NA	NA	NA	NA	NA	NA	NA	NA	NA	NA	NA	NA	NA	NA	NA	NA	NA	NA	NA	NA
ANLN	anillin actin binding protein	54443	ENSG00000011426	HGNC:14082	ANILLIN|Scraps|scra		07p14.2	protein-coding gene	Q9NQW6	0.42877	0.34327	0.34327	0	0	NA	NA|NA|NA	0	NA	NA|NA|NA	0	NA	NA|NA|NA	0	NA	NA|NA|NA	0	NA	NA|NA|NA	0	NA	NA	NA	NA	NA	NA	NA	NA	NA	NA	NA	NA	NA	NA	NA	NA	NA	NA	NA	NA
ANP32A	acidic nuclear phosphoprotein 32 family member A	8125	ENSG00000140350	HGNC:13233	LANP|PP32|I1PP2A|PHAPI|MAPM|mapmodulin	C15orf1	15q23	protein-coding gene	P39687	0.065745	0.21263	0.065745	0	0	NA	NA|NA|NA	0	NA	NA|NA|NA	0	NA	NA|NA|NA	0	NA	NA|NA|NA	0	NA	NA|NA|NA	0	NA	NA	NA	NA	NA	NA	NA	NA	NA	NA	NA	NA	NA	NA	NA	NA	NA	NA	NA	NA
ANP32A-IT1	ANP32A intronic transcript 1	80035		HGNC:25672	FLJ11722|HsT18971	C15orf28|NCRNA00321	15q23	non-coding RNA		NA	NA	NA	NA	0	NA	NA|NA|NA	0	NA	NA|NA|NA	0	NA	NA|NA|NA	0	NA	NA|NA|NA	0	NA	NA|NA|NA	0	NA	NA	NA	NA	NA	NA	NA	NA	NA	NA	NA	NA	NA	NA	NA	NA	NA	NA	NA	NA
ANPEP	alanyl aminopeptidase, membrane	290	ENSG00000166825	HGNC:500	LAP1|gp150|p150	CD13|PEPN	15q26.1	protein-coding gene	P15144	0.22853	0.491	0.22853	0	0	NA	NA|NA|NA	0	NA	NA|NA|NA	0	NA	NA|NA|NA	0	NA	NA|NA|NA	0	NA	NA|NA|NA	0	NA	NA	NA	NA	NA	NA	NA	NA	NA	NA	NA	NA	NA	NA	NA	NA	NA	NA	NA	NA
ANTKMT	adenine nucleotide translocase lysine methyltransferase	65990	ENSG00000103254	HGNC:14152	MGC2494	C16orf24|FAM173A	16p13.3	protein-coding gene	Q9BQD7	0.86796	0.76282	0.76282	0	0	NA	NA|NA|NA	0	NA	NA|NA|NA	0	NA	NA|NA|NA	0	NA	NA|NA|NA	0	NA	NA|NA|NA	0	NA	NA	NA	NA	NA	NA	NA	NA	NA	NA	NA	NA	NA	NA	NA	NA	NA	NA	NA	NA
ANTXR2	ANTXR cell adhesion molecule 2	118429	ENSG00000163297	HGNC:21732	CMG2|CMG-2|FLJ31074		04q21.21	protein-coding gene	P58335	0.18568	0.39329	0.18568	0	0	NA	NA|NA|NA	0	NA	NA|NA|NA	0	NA	NA|NA|NA	0	NA	NA|NA|NA	0	NA	NA|NA|NA	0	NA	NA	NA	NA	NA	NA	NA	NA	NA	NA	NA	NA	NA	NA	NA	NA	NA	NA	NA	NA
ANXA13	annexin A13	312	ENSG00000104537	HGNC:536		ANX13	08q24.13	protein-coding gene	P27216	0.86073	0.73863	0.73863	0	0	NA	NA|NA|NA	0	NA	NA|NA|NA	0	NA	NA|NA|NA	0	NA	NA|NA|NA	0	NA	NA|NA|NA	0	NA	NA	NA	NA	NA	NA	NA	NA	NA	NA	NA	NA	NA	NA	NA	NA	NA	NA	NA	NA
ANXA2	annexin A2	302	ENSG00000182718	HGNC:537	LIP2	ANX2|ANX2L4|CAL1H|LPC2D	15q22.2	protein-coding gene	P07355	0.7621	0.35028	0.35028	0	0	NA	NA|NA|NA	0	NA	NA|NA|NA	0	NA	NA|NA|NA	0	NA	NA|NA|NA	0	NA	NA|NA|NA	0	NA	NA	NA	NA	NA	NA	NA	NA	NA	NA	NA	NA	NA	NA	NA	NA	NA	NA	NA	NA
ANXA2R	annexin A2 receptor	389289	ENSG00000177721	HGNC:33463	AXIIR	C5orf39	05p12	protein-coding gene	Q3ZCQ2	0.5138	0.63324	0.5138	0	0	NA	NA|NA|NA	0	NA	NA|NA|NA	0	NA	NA|NA|NA	0	NA	NA|NA|NA	0	NA	NA|NA|NA	0	NA	NA	NA	NA	NA	NA	NA	NA	NA	NA	NA	NA	NA	NA	NA	NA	NA	NA	NA	NA
ANXA2R-AS1	ANXA2R antisense RNA 1	153684	ENSG00000215068	HGNC:27208			05p12	non-coding RNA		NA	NA	NA	NA	0	NA	NA|NA|NA	0	NA	NA|NA|NA	0	NA	NA|NA|NA	0	NA	NA|NA|NA	0	NA	NA|NA|NA	0	NA	NA	NA	NA	NA	NA	NA	NA	NA	NA	NA	NA	NA	NA	NA	NA	NA	NA	NA	NA
ANXA3	annexin A3	306	ENSG00000138772	HGNC:541		ANX3	04q21.21	protein-coding gene	P12429	0.63963	0.80761	0.63963	0	0	NA	NA|NA|NA	0	NA	NA|NA|NA	0	NA	NA|NA|NA	0	NA	NA|NA|NA	0	NA	NA|NA|NA	0	NA	NA	NA	NA	NA	NA	NA	NA	NA	NA	NA	NA	NA	NA	NA	NA	NA	NA	NA	NA
ANXA4	annexin A4	307	ENSG00000196975	HGNC:542		ANX4	02p13.3	protein-coding gene	P09525	0.48428	0.38791	0.38791	0	0	NA	NA|NA|NA	0	NA	NA|NA|NA	0	NA	NA|NA|NA	0	NA	NA|NA|NA	0	NA	NA|NA|NA	0	NA	NA	NA	NA	NA	NA	NA	NA	NA	NA	NA	NA	NA	NA	NA	NA	NA	NA	NA	NA
ANXA6	annexin A6	309	ENSG00000197043	HGNC:544		ANX6	05q33.1	protein-coding gene	P08133	0.58252	0.37537	0.37537	0	0	NA	NA|NA|NA	0	NA	NA|NA|NA	0	NA	NA|NA|NA	0	NA	NA|NA|NA	0	NA	NA|NA|NA	0	NA	NA	NA	NA	NA	NA	NA	NA	NA	NA	NA	NA	NA	NA	NA	NA	NA	NA	NA	NA
ANXA7	annexin A7	310	ENSG00000138279	HGNC:545		ANX7	10q22.2	protein-coding gene	P20073	0.29065	0.33406	0.29065	0	0	NA	NA|NA|NA	0	NA	NA|NA|NA	0	NA	NA|NA|NA	0	NA	NA|NA|NA	0	NA	NA|NA|NA	0	NA	NA	NA	NA	NA	NA	NA	NA	NA	NA	NA	NA	NA	NA	NA	NA	NA	NA	NA	NA
AOAH	acyloxyacyl hydrolase	313	ENSG00000136250	HGNC:548			07p14.2	protein-coding gene	P28039	0.035352	0.16212	0.035352	0	0	NA	NA|NA|NA	0	NA	NA|NA|NA	0	NA	NA|NA|NA	0	NA	NA|NA|NA	0	NA	NA|NA|NA	0	NA	NA	NA	NA	NA	NA	NA	NA	NA	NA	NA	NA	NA	NA	NA	NA	NA	NA	NA	NA
AOC1	amine oxidase copper containing 1	26	ENSG00000002726	HGNC:80	DAO	ABP1|ABP	07q36.1	protein-coding gene	P19801	0.96489	0.8644	0.8644	0	0	NA	NA|NA|NA	0	NA	NA|NA|NA	0	NA	NA|NA|NA	0	NA	NA|NA|NA	0	NA	NA|NA|NA	0	NA	NA	NA	NA	NA	NA	NA	NA	NA	NA	NA	NA	NA	NA	NA	NA	NA	NA	NA	NA
AOPEP	aminopeptidase O (putative)	84909	ENSG00000148120	HGNC:1361	C90RF3|FLJ14675|APO|AP-O	C9orf3	09q22.32	protein-coding gene	Q8N6M6	0.73824	0.47556	0.47556	0	0	NA	NA|NA|NA	0	NA	NA|NA|NA	0	NA	NA|NA|NA	0	NA	NA|NA|NA	0	NA	NA|NA|NA	0	NA	NA	NA	NA	NA	NA	NA	NA	NA	NA	NA	NA	NA	NA	NA	NA	NA	NA	NA	NA
AOX1	aldehyde oxidase 1	316	ENSG00000138356	HGNC:553	AO|AOH1		02q33.1	protein-coding gene	Q06278	0.33757	0.1366	0.1366	0	0	NA	NA|NA|NA	0	NA	NA|NA|NA	0	NA	NA|NA|NA	0	NA	NA|NA|NA	0	NA	NA|NA|NA	0	NA	NA	NA	NA	NA	NA	NA	NA	NA	NA	NA	NA	NA	NA	NA	NA	NA	NA	NA	NA
AP1G1	adaptor related protein complex 1 subunit gamma 1	164	ENSG00000166747	HGNC:555		CLAPG1|ADTG	16q22.2	protein-coding gene	O43747	0.94282	0.97956	0.94282	0	0	NA	NA|NA|NA	0	NA	NA|NA|NA	0	NA	NA|NA|NA	0	NA	NA|NA|NA	0	NA	NA|NA|NA	0	NA	NA	NA	NA	NA	NA	NA	NA	NA	NA	NA	NA	NA	NA	NA	NA	NA	NA	NA	NA
AP1M1	adaptor related protein complex 1 subunit mu 1	8907	ENSG00000072958	HGNC:13667	AP47|CLAPM2|mu1A		19p13.11	protein-coding gene	Q9BXS5	0.13873	0.10491	0.10491	0	0	NA	NA|NA|NA	0	NA	NA|NA|NA	0	NA	NA|NA|NA	0	NA	NA|NA|NA	0	NA	NA|NA|NA	0	NA	NA	NA	NA	NA	NA	NA	NA	NA	NA	NA	NA	NA	NA	NA	NA	NA	NA	NA	NA
AP1M2	adaptor related protein complex 1 subunit mu 2	10053	ENSG00000129354	HGNC:558	HSMU1B|mu2|AP1-mu2		19p13.2	protein-coding gene	Q9Y6Q5	0.54284	0.47431	0.47431	0	0	NA	NA|NA|NA	0	NA	NA|NA|NA	0	NA	NA|NA|NA	0	NA	NA|NA|NA	0	NA	NA|NA|NA	0	NA	NA	NA	NA	NA	NA	NA	NA	NA	NA	NA	NA	NA	NA	NA	NA	NA	NA	NA	NA
AP1S2	adaptor related protein complex 1 subunit sigma 2	8905	ENSG00000182287	HGNC:560	SIGMA1B	MRX59|MRXS5|PGS	Xp22.2	protein-coding gene	P56377	NA	NA	NA	NA	0	NA	NA|NA|NA	0	NA	NA|NA|NA	0	NA	NA|NA|NA	0	NA	NA|NA|NA	0	NA	NA|NA|NA	0	NA	NA	NA	NA	NA	NA	NA	NA	NA	NA	NA	NA	NA	NA	NA	NA	NA	NA	NA	NA
AP1S3	adaptor related protein complex 1 subunit sigma 3	130340	ENSG00000152056	HGNC:18971	sigma1C		02q36.1	protein-coding gene	Q96PC3	0.2174	0.10097	0.10097	0	0	NA	NA|NA|NA	0	NA	NA|NA|NA	0	NA	NA|NA|NA	0	NA	NA|NA|NA	0	NA	NA|NA|NA	0	NA	NA	NA	NA	NA	NA	NA	NA	NA	NA	NA	NA	NA	NA	NA	NA	NA	NA	NA	NA
AP2A1	adaptor related protein complex 2 subunit alpha 1	160	ENSG00000196961	HGNC:561		CLAPA1|ADTAA	19q13.33	protein-coding gene	O95782	0.53305	0.052053	0.052053	0	0	NA	NA|NA|NA	0	NA	NA|NA|NA	0	NA	NA|NA|NA	0	NA	NA|NA|NA	0	NA	NA|NA|NA	0	NA	NA	NA	NA	NA	NA	NA	NA	NA	NA	NA	NA	NA	NA	NA	NA	NA	NA	NA	NA
AP2A2	adaptor related protein complex 2 subunit alpha 2	161	ENSG00000183020	HGNC:562	DKFZP564D1864|HYPJ|KIAA0899|HIP9	CLAPA2|ADTAB	11p15.5	protein-coding gene	O94973	0.23086	0.33894	0.23086	0	0	NA	NA|NA|NA	0	NA	NA|NA|NA	0	NA	NA|NA|NA	0	NA	NA|NA|NA	0	NA	NA|NA|NA	0	NA	NA	NA	NA	NA	NA	NA	NA	NA	NA	NA	NA	NA	NA	NA	NA	NA	NA	NA	NA
AP2B1	adaptor related protein complex 2 subunit beta 1	163	ENSG00000006125	HGNC:563		ADTB2|CLAPB1	17q12	protein-coding gene	P63010	0.033793	0.028414	0.028414	0	0	NA	NA|NA|NA	0	NA	NA|NA|NA	0	NA	NA|NA|NA	0	NA	NA|NA|NA	0	NA	NA|NA|NA	0	NA	NA	NA	NA	NA	NA	NA	NA	NA	NA	NA	NA	NA	NA	NA	NA	NA	NA	NA	NA
AP2M1	adaptor related protein complex 2 subunit mu 1	1173	ENSG00000161203	HGNC:564	AP50|mu2	CLAPM1	03q27.1	protein-coding gene	Q96CW1	0.72173	0.33634	0.33634	0	0	NA	NA|NA|NA	0	NA	NA|NA|NA	0	NA	NA|NA|NA	0	NA	NA|NA|NA	0	NA	NA|NA|NA	0	NA	NA	NA	NA	NA	NA	NA	NA	NA	NA	NA	NA	NA	NA	NA	NA	NA	NA	NA	NA
AP3B1	adaptor related protein complex 3 subunit beta 1	8546	ENSG00000132842	HGNC:566	ADTB3A|HPS2		05q14.1	protein-coding gene	O00203	0.68122	0.72026	0.68122	0	0	NA	NA|NA|NA	0	NA	NA|NA|NA	0	NA	NA|NA|NA	0	NA	NA|NA|NA	0	NA	NA|NA|NA	0	NA	NA	NA	NA	NA	NA	NA	NA	NA	NA	NA	NA	NA	NA	NA	NA	NA	NA	NA	NA
AP3D1	adaptor related protein complex 3 subunit delta 1	8943	ENSG00000065000	HGNC:568	ADTD		19p13.3	protein-coding gene	O14617	0.42691	0.48848	0.42691	0	0	NA	NA|NA|NA	0	NA	NA|NA|NA	0	NA	NA|NA|NA	0	NA	NA|NA|NA	0	NA	NA|NA|NA	0	NA	NA	NA	NA	NA	NA	NA	NA	NA	NA	NA	NA	NA	NA	NA	NA	NA	NA	NA	NA
AP3M2	adaptor related protein complex 3 subunit mu 2	10947	ENSG00000070718	HGNC:570	CLA20|AP47B		08p11.21	protein-coding gene	P53677	0.38249	0.54149	0.38249	0	0	NA	NA|NA|NA	0	NA	NA|NA|NA	0	NA	NA|NA|NA	0	NA	NA|NA|NA	0	NA	NA|NA|NA	0	NA	NA	NA	NA	NA	NA	NA	NA	NA	NA	NA	NA	NA	NA	NA	NA	NA	NA	NA	NA
AP3S2	adaptor related protein complex 3 subunit sigma 2	10239	ENSG00000157823	HGNC:571	sigma3b		15q26.1	protein-coding gene	P59780	0.70857	0.3526	0.3526	0	0	NA	NA|NA|NA	0	NA	NA|NA|NA	0	NA	NA|NA|NA	0	NA	NA|NA|NA	0	NA	NA|NA|NA	0	NA	NA	NA	NA	NA	NA	NA	NA	NA	NA	NA	NA	NA	NA	NA	NA	NA	NA	NA	NA
AP4B1	adaptor related protein complex 4 subunit beta 1	10717	ENSG00000134262	HGNC:572	BETA-4	SPG47	01p13.2	protein-coding gene	Q9Y6B7	0.4001	0.041221	0.041221	0	0	NA	NA|NA|NA	0	NA	NA|NA|NA	0	NA	NA|NA|NA	0	NA	NA|NA|NA	0	NA	NA|NA|NA	0	NA	NA	NA	NA	NA	NA	NA	NA	NA	NA	NA	NA	NA	NA	NA	NA	NA	NA	NA	NA
AP4M1	adaptor related protein complex 4 subunit mu 1	9179	ENSG00000221838	HGNC:574	MU-ARP2|MU-4|SPG50		07q22.1	protein-coding gene	O00189	0.18982	0.20554	0.18982	0	0	NA	NA|NA|NA	0	NA	NA|NA|NA	0	NA	NA|NA|NA	0	NA	NA|NA|NA	0	NA	NA|NA|NA	0	NA	NA	NA	NA	NA	NA	NA	NA	NA	NA	NA	NA	NA	NA	NA	NA	NA	NA	NA	NA
AP4S1	adaptor related protein complex 4 subunit sigma 1	11154	ENSG00000100478	HGNC:575	CLA20|AP47B|SPG52		14q12	protein-coding gene	Q9Y587	0.082894	0.03661	0.03661	0	0	NA	NA|NA|NA	0	NA	NA|NA|NA	0	NA	NA|NA|NA	0	NA	NA|NA|NA	0	NA	NA|NA|NA	0	NA	NA	NA	NA	NA	NA	NA	NA	NA	NA	NA	NA	NA	NA	NA	NA	NA	NA	NA	NA
AP5S1	adaptor related protein complex 5 subunit sigma 1	55317	ENSG00000125843	HGNC:15875	FLJ11168	C20orf29	20p13	protein-coding gene	Q9NUS5	0.097488	0.30191	0.097488	0	0	NA	NA|NA|NA	0	NA	NA|NA|NA	0	NA	NA|NA|NA	0	NA	NA|NA|NA	0	NA	NA|NA|NA	0	NA	NA	NA	NA	NA	NA	NA	NA	NA	NA	NA	NA	NA	NA	NA	NA	NA	NA	NA	NA
AP5Z1	adaptor related protein complex 5 subunit zeta 1	9907	ENSG00000242802	HGNC:22197	SPG48|zeta	KIAA0415	07p22.1	protein-coding gene	O43299	0.85415	0.7418	0.7418	0	0	NA	NA|NA|NA	0	NA	NA|NA|NA	0	NA	NA|NA|NA	0	NA	NA|NA|NA	0	NA	NA|NA|NA	0	NA	NA	NA	NA	NA	NA	NA	NA	NA	NA	NA	NA	NA	NA	NA	NA	NA	NA	NA	NA
APBA2	amyloid beta precursor protein binding family A member 2	321	ENSG00000034053	HGNC:579	D15S1518E|LIN-10|MGC:14091|HsT16821	X11L|MINT2	15q13.1	protein-coding gene	Q99767	0.45845	0.64587	0.45845	0	0	NA	NA|NA|NA	0	NA	NA|NA|NA	0	NA	NA|NA|NA	0	NA	NA|NA|NA	0	NA	NA|NA|NA	0	NA	NA	NA	NA	NA	NA	NA	NA	NA	NA	NA	NA	NA	NA	NA	NA	NA	NA	NA	NA
APBA3	amyloid beta precursor protein binding family A member 3	9546	ENSG00000011132	HGNC:580	X11L2|mint3		19p13.3	protein-coding gene	O96018	0.34694	0.83884	0.34694	0	0	NA	NA|NA|NA	0	NA	NA|NA|NA	0	NA	NA|NA|NA	0	NA	NA|NA|NA	0	NA	NA|NA|NA	0	NA	NA	NA	NA	NA	NA	NA	NA	NA	NA	NA	NA	NA	NA	NA	NA	NA	NA	NA	NA
APBB1IP	amyloid beta precursor protein binding family B member 1 interacting protein	54518	ENSG00000077420	HGNC:17379	INAG1|RIAM		10p12.1	protein-coding gene	Q7Z5R6	0.39407	0.57233	0.39407	0	0	NA	NA|NA|NA	0	NA	NA|NA|NA	0	NA	NA|NA|NA	0	NA	NA|NA|NA	0	NA	NA|NA|NA	0	NA	NA	NA	NA	NA	NA	NA	NA	NA	NA	NA	NA	NA	NA	NA	NA	NA	NA	NA	NA
APBB3	amyloid beta precursor protein binding family B member 3	10307	ENSG00000113108	HGNC:20708	FE65L2		05q31.3	protein-coding gene	O95704	0.46823	0.25493	0.25493	0	0	NA	NA|NA|NA	0	NA	NA|NA|NA	0	NA	NA|NA|NA	0	NA	NA|NA|NA	0	NA	NA|NA|NA	0	NA	NA	NA	NA	NA	NA	NA	NA	NA	NA	NA	NA	NA	NA	NA	NA	NA	NA	NA	NA
APC	APC regulator of WNT signaling pathway	324	ENSG00000134982	HGNC:583	DP2|DP3|DP2.5|PPP1R46		05q22.2	protein-coding gene	P25054	0.075808	0.046404	0.046404	0	0	NA	NA|NA|NA	0	NA	NA|NA|NA	0	NA	NA|NA|NA	0	NA	NA|NA|NA	0	NA	NA|NA|NA	0	NA	NA	NA	NA	NA	NA	NA	NA	NA	NA	NA	NA	NA	NA	NA	NA	NA	NA	NA	NA
APCDD1	APC down-regulated 1	147495	ENSG00000154856	HGNC:15718	B7323		18p11.22	protein-coding gene	Q8J025	0.065398	0.4456	0.065398	0	0	NA	NA|NA|NA	0	NA	NA|NA|NA	0	NA	NA|NA|NA	0	NA	NA|NA|NA	0	NA	NA|NA|NA	0	NA	NA	NA	NA	NA	NA	NA	NA	NA	NA	NA	NA	NA	NA	NA	NA	NA	NA	NA	NA
APCS	amyloid P component, serum	325	ENSG00000132703	HGNC:584	SAP|PTX2|MGC88159		01q23.2	protein-coding gene	P02743	0.71975	0.68714	0.68714	0	0	NA	NA|NA|NA	0	NA	NA|NA|NA	0	NA	NA|NA|NA	0	NA	NA|NA|NA	0	NA	NA|NA|NA	0	NA	NA	NA	NA	NA	NA	NA	NA	NA	NA	NA	NA	NA	NA	NA	NA	NA	NA	NA	NA
APEH	acylaminoacyl-peptide hydrolase	327	ENSG00000164062	HGNC:586		D3F15S2|DNF15S2|D3S48E	03p21.31	protein-coding gene	P13798	0.0040836	0.024923	0.0040836	0	0	NA	NA|NA|NA	0	NA	NA|NA|NA	0	NA	NA|NA|NA	0	NA	NA|NA|NA	0	NA	NA|NA|NA	0	NA	NA	NA	NA	NA	NA	NA	NA	NA	NA	NA	NA	NA	NA	NA	NA	NA	NA	NA	NA
APEX1	apurinic/apyrimidinic endodeoxyribonuclease 1	328	ENSG00000100823	HGNC:587	APE|REF1|HAP1|APX|APEN|REF-1|APE-1	APEX	14q11.2	protein-coding gene	P27695	0.38862	0.38676	0.38676	0	0	NA	NA|NA|NA	0	NA	NA|NA|NA	0	NA	NA|NA|NA	0	NA	NA|NA|NA	0	NA	NA|NA|NA	0	NA	NA	NA	NA	NA	NA	NA	NA	NA	NA	NA	NA	NA	NA	NA	NA	NA	NA	NA	NA
APH1A	aph-1 homolog A, gamma-secretase subunit	51107	ENSG00000117362	HGNC:29509	APH-1A|CGI-78		01q21.2	protein-coding gene	Q96BI3	0.31388	0.15209	0.15209	0	0	NA	NA|NA|NA	0	NA	NA|NA|NA	0	NA	NA|NA|NA	0	NA	NA|NA|NA	0	NA	NA|NA|NA	0	NA	NA	NA	NA	NA	NA	NA	NA	NA	NA	NA	NA	NA	NA	NA	NA	NA	NA	NA	NA
API5	apoptosis inhibitor 5	8539	ENSG00000166181	HGNC:594	AAC-11|API5L1|AAC11		11p12	protein-coding gene	Q9BZZ5	0.12889	0.32209	0.12889	0	0	NA	NA|NA|NA	0	NA	NA|NA|NA	0	NA	NA|NA|NA	0	NA	NA|NA|NA	0	NA	NA|NA|NA	0	NA	NA	NA	NA	NA	NA	NA	NA	NA	NA	NA	NA	NA	NA	NA	NA	NA	NA	NA	NA
APIP	APAF1 interacting protein	51074	ENSG00000149089	HGNC:17581	CGI-29|Mmrp19|APIP2		11p13	protein-coding gene	Q96GX9	0.68448	0.50735	0.50735	0	0	NA	NA|NA|NA	0	NA	NA|NA|NA	0	NA	NA|NA|NA	0	NA	NA|NA|NA	0	NA	NA|NA|NA	0	NA	NA	NA	NA	NA	NA	NA	NA	NA	NA	NA	NA	NA	NA	NA	NA	NA	NA	NA	NA
APLN	apelin	8862	ENSG00000171388	HGNC:16665	apelin|XNPEP2		Xq26.1	protein-coding gene	Q9ULZ1	NA	NA	NA	NA	0	NA	NA|NA|NA	0	NA	NA|NA|NA	0	NA	NA|NA|NA	0	NA	NA|NA|NA	0	NA	NA|NA|NA	0	NA	NA	NA	NA	NA	NA	NA	NA	NA	NA	NA	NA	NA	NA	NA	NA	NA	NA	NA	NA
APLNR	apelin receptor	187	ENSG00000134817	HGNC:339	FLJ90771|APJ|APJR	AGTRL1	11q12.1	protein-coding gene	P35414	0.9495	0.36723	0.36723	0	0	NA	NA|NA|NA	0	NA	NA|NA|NA	0	NA	NA|NA|NA	0	NA	NA|NA|NA	0	NA	NA|NA|NA	0	NA	NA	NA	NA	NA	NA	NA	NA	NA	NA	NA	NA	NA	NA	NA	NA	NA	NA	NA	NA
APLP2	amyloid beta precursor like protein 2	334	ENSG00000084234	HGNC:598	APPH	APPL2	11q24.3	protein-coding gene	Q06481	0.76644	0.22991	0.22991	0	0	NA	NA|NA|NA	0	NA	NA|NA|NA	0	NA	NA|NA|NA	0	NA	NA|NA|NA	0	NA	NA|NA|NA	0	NA	NA	NA	NA	NA	NA	NA	NA	NA	NA	NA	NA	NA	NA	NA	NA	NA	NA	NA	NA
APOA4	apolipoprotein A4	337	ENSG00000110244	HGNC:602			11q23.3	protein-coding gene	P06727	0.29384	0.20259	0.20259	0	0	NA	NA|NA|NA	0	NA	NA|NA|NA	0	NA	NA|NA|NA	0	NA	NA|NA|NA	0	NA	NA|NA|NA	0	NA	NA	NA	NA	NA	NA	NA	NA	NA	NA	NA	NA	NA	NA	NA	NA	NA	NA	NA	NA
APOA5	apolipoprotein A5	116519	ENSG00000110243	HGNC:17288	RAP3|APOA-V		11q23.3	protein-coding gene	Q6Q788	0.16128	0.14099	0.14099	0	0	NA	NA|NA|NA	0	NA	NA|NA|NA	0	NA	NA|NA|NA	0	NA	NA|NA|NA	0	NA	NA|NA|NA	0	NA	NA	NA	NA	NA	NA	NA	NA	NA	NA	NA	NA	NA	NA	NA	NA	NA	NA	NA	NA
APOB	apolipoprotein B	338	ENSG00000084674	HGNC:603			02p24.1	protein-coding gene	P04114	0.1041	0.56206	0.1041	0	0	NA	NA|NA|NA	0	NA	NA|NA|NA	0	NA	NA|NA|NA	0	NA	NA|NA|NA	0	NA	NA|NA|NA	0	NA	NA	NA	NA	NA	NA	NA	NA	NA	NA	NA	NA	NA	NA	NA	NA	NA	NA	NA	NA
APOBEC3B	apolipoprotein B mRNA editing enzyme catalytic subunit 3B	9582	ENSG00000179750	HGNC:17352	PHRBNL|FLJ21201		22q13.1	protein-coding gene	Q9UH17	NA	0.64888	0.64888	0	0	NA	NA|NA|NA	0	NA	NA|NA|NA	0	NA	NA|NA|NA	0	NA	NA|NA|NA	0	NA	NA|NA|NA	0	NA	NA	NA	NA	NA	NA	NA	NA	NA	NA	NA	NA	NA	NA	NA	NA	NA	NA	NA	NA
APOBEC3C	apolipoprotein B mRNA editing enzyme catalytic subunit 3C	27350	ENSG00000244509	HGNC:17353	APOBEC1L|PBI|bK150C2.3|ARDC2|ARDC4|ARP5		22q13.1	protein-coding gene	Q9NRW3	0.56727	0.55749	0.55749	0	0	NA	NA|NA|NA	0	NA	NA|NA|NA	0	NA	NA|NA|NA	0	NA	NA|NA|NA	0	NA	NA|NA|NA	0	NA	NA	NA	NA	NA	NA	NA	NA	NA	NA	NA	NA	NA	NA	NA	NA	NA	NA	NA	NA
APOC2	apolipoprotein C2	344	ENSG00000234906	HGNC:609			19q13.32	protein-coding gene	P02655	0.74795	0.79106	0.74795	0	0	NA	NA|NA|NA	0	NA	NA|NA|NA	0	NA	NA|NA|NA	0	NA	NA|NA|NA	0	NA	NA|NA|NA	0	NA	NA	NA	NA	NA	NA	NA	NA	NA	NA	NA	NA	NA	NA	NA	NA	NA	NA	NA	NA
[truncated: 8,467 more rows]
[truncated: 256 more columns]

## Sheet: Notes
Column	Meaning
Gene	Gene symbol. Color coding refers to the colors used in the molecular landscape of TD (Figure 1).
[truncated: 31 more rows]
