# Supplementary material for: Molecular Landscape of Tourette’s Disorder
Source: Int J Mol Sci. 2023 Jan 11;24(2):1428. doi: 10.3390/ijms24021428 (PMC9865021; doi:10.3390/ijms24021428)
Supplement: Supplementary file 1 [file ijms-24-01428-s001.zip › supplementary Table S3.xlsx]

## Sheet: S3-a. Canonical Pathways
Canonical Pathway	-log(p-value)	-log(B-H p-value)	Ratio	Molecules
cAMP-mediated signaling	4.41	1.71	0.0936	ADCY2,AKAP9,CAMK1D,CRHR1,DRD2,DUSP6,FFAR3,FPR1,FPR2,GRK4,HRH2,MAPK3,MPPE1,OPRD1,OPRK1,OPRM1,PALM2AKAP2,PDE4A,PDE6B,PDE9A,PRKAR2A,RGS12
Endocannabinoid Neuronal Synapse Pathway	4.06	1.66	0.107	ADCY2,CACNA1D,CACNA1I,CACNA1S,CACNA2D3,DAGLA,DNAH1,DNAH10,DNAH3,GNB1L,GRIN2A,MAPK3,PLCH1,PRKAG1,PRKAR2A,RIMS1
Gαi Signaling	3.31	1.09	0.1	ADCY2,DRD2,FFAR3,FPR1,FPR2,GNB1L,MAPK3,OPRD1,OPRK1,OPRM1,PRKAG1,PRKAR2A,RGS12,SOS1
Synaptogenesis Signaling Pathway	2.96	0.971	0.0726	ACTR3,ADCY2,CDH23,CDH7,CNTNAP2,CRKL,EFNA5,EPHB2,GRIN2A,KALRN,MAPK3,MAPT,NLGN3,NLGN4X,NRXN1,NSF,PRKAG1,PRKAR2A,RASGRP1,RELN,SOS1,SYT17,THBS1
Choline Degradation I	2.9	0.971	1	ALDH7A1,CHDH
Axonal Guidance Signaling	2.82	0.971	0.0629	ACTR3,ADAM23,ADAMTS6,CHMP1A,CRKL,DCC,EFNA5,EPHB2,FARP2,GNB1L,ITGB6,KALRN,KLC1,LINGO1,MAPK3,NGEF,PLCH1,PRKAG1,PRKAR2A,PSMD14,ROBO3,RTN4R,SEMA3E,SHANK2,SOS1,TUBA1A,TUBA1B,TUBA1C,WNT1,WNT10B,WNT3,WNT5A
G-Protein Coupled Receptor Signaling	2.82	0.971	0.0583	ADCY2,CELSR3,CRHR1,DRD2,DUSP6,FFAR3,FPR1,FPR2,FPR3,GNB1L,GPR149,GPR157,GPR37,GPR63,GPR75,GPR89A/GPR89B,GPRIN1,GRK4,HCN1,HCN4,HRH2,MAP3K4,MAP3K6,MAPK3,MCHR1,MPPE1,MRTFA,OPRD1,OPRK1,OPRM1,PDE4A,PDE6B,PDE9A,PREX1,PRKAG1,PRKAR2A,RASGRP1,RGS12,SOS1,TSHR,TTN
Cardiac β-adrenergic Signaling	2.71	0.943	0.0838	ADCY2,AKAP9,CACNA1D,CACNA1S,CACNA2D3,GNB1L,MPPE1,PALM2AKAP2,PDE4A,PDE6B,PDE9A,PPP1R3A,PPP2R2B,PRKAG1,PRKAR2A
Parkinson's Signaling	2.68	0.943	0.25	GPR37,PARK7,SEPTIN5,UCHL1
Gustation Pathway	2.58	0.886	0.0788	ADCY2,CACNA1D,CACNA1I,CACNA1S,CACNA2D3,GABRA2,GABRB3,GABRG1,GCG,GPR37,KCNJ11,P2RX2,P2RX6,PRKAG1,PRKAR2A,SCN5A
Xenobiotic Metabolism CAR Signaling Pathway	2.46	0.807	0.0789	ABCC1,ALDH18A1,ALDH7A1,CHST5,EGFR,EP300,FMO2,GAL3ST2,HS2ST1,HS3ST4,HSP90AA1,MAPK3,MGST1,PPP2R2B,SULT4A1
Chondroitin Sulfate Biosynthesis	2.35	0.74	0.121	CHST5,CSGALNACT2,GAL3ST2,HS2ST1,HS3ST4,SULT4A1,XYLT1
Dermatan Sulfate Biosynthesis	2.27	0.74	0.117	CHST5,CSGALNACT2,GAL3ST2,HS2ST1,HS3ST4,SULT4A1,XYLT1
Opioid Signaling Pathway	2.23	0.74	0.0679	ADCY2,CACNA1D,CACNA1I,CACNA1S,CACNA2D3,CAMK1D,CLTCL1,EP300,GNB1L,GRIN2A,GRK4,MAPK3,OPRD1,OPRK1,OPRM1,PRKAG1,PRKAR2A,RGS12,SOS1
Aldosterone Signaling in Epithelial Cells	2.22	0.74	0.0793	AHCY,DNAJB7,DNAJC13,DNAJC15,DNAJC18,DNAJC22,DNAJC8,HSP90AA1,MAPK3,PI4KA,PIKFYVE,PLCH1,SOS1
G Beta Gamma Signaling	2.18	0.74	0.0853	ADCY2,CACNA1D,CACNA1I,CACNA1S,CACNA2D3,EGFR,GNB1L,MAPK3,PRKAG1,PRKAR2A,SOS1
CREB Signaling in Neurons	2.18	0.74	0.0561	ADCY2,CACNA1D,CACNA1I,CACNA1S,CACNA2D3,CELSR3,CRHR1,DRD2,EGFR,EP300,FFAR3,FPR1,FPR2,FPR3,GNB1L,GPR149,GPR157,GPR37,GPR63,GPR75,GPR89A/GPR89B,GRIN2A,HRH2,MAPK3,MCHR1,OPRD1,OPRK1,OPRM1,PLCH1,POLR2I,PRKAG1,PRKAR2A,SOS1,TSHR
Dilated Cardiomyopathy Signaling Pathway	2.16	0.74	0.0811	ADCY2,CACNA1D,CACNA1I,CACNA1S,CACNA2D3,CAMK1D,MAPK3,MYO10,PRKAG1,PRKAR2A,SCN5A,TTN
Neurovascular Coupling Signaling Pathway	2.15	0.74	0.0711	CACNA1D,CACNA1I,CACNA1S,CACNA2D3,DAGLA,GABRA2,GABRB3,GABRG1,GRIN2A,KCNJ11,KCNMB3,MAPT,MPRIP,PLA2R1,PRKAG1,PRKAR2A
Cellular Effects of Sildenafil (Viagra)	2.12	0.74	0.08	ADCY2,CACNA1D,CACNA1S,CACNA2D3,GPR37,MPRIP,MYO10,PDE4A,PLCH1,PRKAG1,PRKAR2A,SLC4A10
Androgen Signaling	2.11	0.74	0.0769	CACNA1D,CACNA1I,CACNA1S,CACNA2D3,EP300,GNB1L,GTF2A1,GTF2H1,HSP90AA1,MAPK3,POLR2I,PRKAG1,PRKAR2A
GABA Receptor Signaling	2.09	0.74	0.0827	ADCY2,CACNA1D,CACNA1I,CACNA1S,CACNA2D3,GABRA2,GABRB3,GABRG1,GNB1L,GPR37,NSF
Chondroitin Sulfate Biosynthesis (Late Stages)	2.07	0.74	0.12	CHST5,CSGALNACT2,GAL3ST2,HS2ST1,HS3ST4,SULT4A1
GPCR-Mediated Nutrient Sensing in Enteroendocrine Cells	2.01	0.699	0.0847	ADCY2,CACNA1D,CACNA1I,CACNA1S,CACNA2D3,FFAR3,GCG,PLCH1,PRKAG1,PRKAR2A
BAG2 Signaling Pathway	1.99	0.695	0.0952	CDKN1A,CHRNA7,HSP90AA1,MAPK3,MAPT,PSMD14,PSMD7,PSME4
White Adipose Tissue Browning Pathway	1.97	0.693	0.0797	ADCY2,CACNA1D,CACNA1I,CACNA1S,CACNA2D3,DIO2,KLB,PRKAG1,PRKAR2A,RUNX1T1,VGF
Reelin Signaling in Neurons	1.95	0.688	0.0791	ACTR3,ARHGEF3,ARHGEF33,CRKL,DNAH1,DNAH10,DNAH3,GRIN2A,MAPK3,MAPT,RELN
Pulmonary Fibrosis Idiopathic Signaling Pathway	1.87	0.616	0.0613	COL4A2,COL5A1,COL6A3,COL6A6,COL8A1,COL9A2,EGFR,EP300,FN1,ITGB6,MAPK3,MRTFA,NOTCH1,SOS1,STK38,THBS1,WNT1,WNT10B,WNT3,WNT5A
Netrin Signaling	1.85	0.616	0.0972	CACNA1D,CACNA1I,CACNA1S,CACNA2D3,DCC,PRKAG1,PRKAR2A
Superpathway of Citrulline Metabolism	1.83	0.607	0.2	ALDH18A1,CPS1,LOC102724788/PRODH
GNRH Signaling	1.69	0.503	0.0677	ADCY2,CACNA1D,CACNA1I,CACNA1S,CACNA2D3,EGFR,GNB1L,MAP3K4,MAP3K6,MAPK3,PRKAG1,PRKAR2A,SOS1
Xenobiotic Metabolism PXR Signaling Pathway	1.67	0.503	0.0674	ALDH18A1,ALDH7A1,CHST5,EP300,GAL3ST2,HS2ST1,HS3ST4,HSP90AA1,MGST1,PPP1R3A,PRKAG1,PRKAR2A,SULT4A1
Estrogen Receptor Signaling	1.66	0.503	0.0562	ADCY2,CACNA1D,CACNA1S,CACNA2D3,CDKN1A,EGFR,EIF2B2,EP300,ESR1,GNB1L,HSP90AA1,MAPK3,MED15,MPRIP,NDUFA13,NDUFA4,NDUFA6,NDUFB1,NOTCH1,PLCH1,PRKAG1,PRKAR2A,SOS1
Dopamine Receptor Signaling	1.65	0.503	0.0886	ADCY2,COMT,DRD2,PPP1R3A,PPP2R2B,PRKAG1,PRKAR2A
Breast Cancer Regulation by Stathmin1	1.64	0.503	0.0522	ARHGEF3,CAMK1D,CELSR3,CRHR1,DRD2,FFAR3,FPR1,FPR2,FPR3,GNB1L,GPR149,GPR157,GPR37,GPR63,GPR75,GPR89A/GPR89B,HRH2,MAPK3,MCHR1,OPRD1,OPRK1,OPRM1,PPP1R3A,PPP2R2B,PRKAG1,PRKAR2A,SOS1,TSHR,TUBA1A,TUBA1B,TUBA1C
Role of RIG1-like Receptors in Antiviral Innate Immunity	1.63	0.503	0.109	CASP8,EP300,IFIH1,TANK,TRAF3
Role of OCT4 in Mammalian Embryonic Stem Cell Pluripotency	1.63	0.503	0.109	CDX2,IGF2BP1,KDM5B,PHC3,SH3GLB1
Calcium Signaling	1.6	0.496	0.0642	CACNA1D,CACNA1I,CACNA1S,CACNA2D3,CAMK1D,CHRNA7,CHRNB4,EP300,GRIN2A,MAPK3,MYO10,PRKAG1,PRKAR2A,RCAN1
Dermatan Sulfate Biosynthesis (Late Stages)	1.6	0.496	0.106	CHST5,GAL3ST2,HS2ST1,HS3ST4,SULT4A1
Gap Junction Signaling	1.59	0.496	0.0657	ADCY2,DBN1,DRD2,EGFR,MAPK3,PLCH1,PRKAG1,PRKAR2A,SOS1,TJP1,TUBA1A,TUBA1B,TUBA1C
Role of NFAT in Cardiac Hypertrophy	1.54	0.46	0.0631	ADCY2,CACNA1D,CACNA1I,CACNA1S,CACNA2D3,CAMK1D,EP300,GNB1L,MAPK3,PLCH1,PRKAG1,PRKAR2A,RCAN1,SOS1
NER (Nucleotide Excision Repair, Enhanced Pathway)	1.51	0.452	0.0777	EP300,ERCC5,GTF2H1,POLD1,POLE,POLR2I,RBX1,RPA2
Xenobiotic Metabolism Signaling	1.5	0.452	0.0586	ALDH18A1,ALDH7A1,CAMK1D,CHST5,EP300,FMO2,GAL3ST2,HS2ST1,HS3ST4,HSP90AA1,MAP3K4,MAP3K6,MAPK3,MGST1,PPP2R2B,RBX1,SULT4A1
HOTAIR Regulatory Pathway	1.49	0.452	0.0675	CDKN1A,EP300,ESR1,KMT2C,MEX3B,MRTFA,STK38,WNT1,WNT10B,WNT3,WNT5A
Dopamine-DARPP32 Feedback in cAMP Signaling	1.49	0.452	0.0652	ADCY2,CACNA1D,CACNA1S,CACNA2D3,DRD2,GRIN2A,KCNJ11,PLCH1,PPP1R3A,PPP2R2B,PRKAG1,PRKAR2A
Sirtuin Signaling Pathway	1.47	0.452	0.0582	CPS1,CPT1C,DUSP6,GABARAPL2,GABPB1,MAP1LC3B,MAPK3,NDUFA13,NDUFA4,NDUFA6,NDUFB1,NR1H2,PFKM,TUBA1A,TUBA1B,TUBA1C,XRCC6
Amyloid Processing	1.46	0.452	0.098	CAPN6,MAPK3,MAPT,PRKAG1,PRKAR2A
Nucleotide Excision Repair Pathway	1.45	0.452	0.114	ERCC5,GTF2H1,POLR2I,RPA2
Melatonin Degradation III	1.45	0.452	1	MPO
Histamine Biosynthesis	1.45	0.452	1	HDC
Phagosome Formation	1.43	0.452	0.0492	ACTR3,CELSR3,CRHR1,CRKL,DRD2,FFAR3,FN1,FPR1,FPR2,FPR3,GPLD1,GPR149,GPR157,GPR37,GPR63,GPR75,GPR89A/GPR89B,HRH2,ITGB6,MAPK3,MCHR1,MRC1,MYO10,OPRD1,OPRK1,OPRM1,PI4KA,PIKFYVE,PLA2R1,RASGRP1,SOS1,TLN2,TSHR,TTN
Telomerase Signaling	1.42	0.452	0.0748	CDKN1A,EGFR,ETS1,HSP90AA1,MAPK3,PPP2R2B,SOS1,TERF2IP
Heparan Sulfate Biosynthesis	1.42	0.452	0.0795	AADAC,CHST5,GAL3ST2,HS2ST1,HS3ST4,SULT4A1,XYLT1
Citrulline Biosynthesis	1.41	0.449	0.222	ALDH18A1,LOC102724788/PRODH
Corticotropin Releasing Hormone Signaling	1.35	0.397	0.0662	ADCY2,CACNA1D,CACNA1I,CACNA1S,CACNA2D3,CRHR1,JUND,MAPK3,PRKAG1,PRKAR2A
ERK/MAPK Signaling	1.33	0.387	0.0602	CRKL,DUSP6,ESR1,ETS1,ITGB6,MAPK3,PPP1R3A,PPP2R2B,PRKAG1,PRKAR2A,SOS1,TLN2,VRK2
Vitamin-C Transport	1.33	0.387	0.13	SLC23A1,SLC23A2,TXNRD2
CSDE1 Signaling Pathway	1.31	0.378	0.0893	EDC4,FN1,PABPC5,PIWIL1,TRIO
CDK5 Signaling	1.29	0.365	0.0702	ADCY2,LAMA5,MAPK3,MAPT,PPP1R3A,PPP2R2B,PRKAG1,PRKAR2A
Pulmonary Healing Signaling Pathway	1.27	0.352	0.0603	CHRNA7,EGFR,EP300,MAPK3,NOTCH1,PRKAG1,SOS1,THBS1,WNT1,WNT10B,WNT3,WNT5A
Neuregulin Signaling	1.24	0.325	0.0684	CRKL,EGFR,ERRFI1,HSP90AA1,ITGB6,MAPK3,RNF41,SOS1
PCP (Planar Cell Polarity) Pathway	1.2	0.316	0.0833	JUND,WNT1,WNT10B,WNT3,WNT5A
Maturity Onset Diabetes of Young (MODY) Signaling	1.2	0.316	0.0759	APOM,CACNA1D,CACNA1S,CACNA2D3,EP300,KCNJ11
IL-17A Signaling in Gastric Cells	1.19	0.316	0.115	EGFR,IL17RB,MAPK3
D-myo-inositol (1,4,5)-Trisphosphate Biosynthesis	1.19	0.316	0.115	PI4KA,PIKFYVE,PLCH1
Sertoli Cell-Sertoli Cell Junction Signaling	1.18	0.316	0.0583	CLDN5,EPB41,ITGB6,MAP3K4,MAP3K6,MAPK3,PRKAG1,PRKAR2A,TJP1,TUBA1A,TUBA1B,TUBA1C
Heparan Sulfate Biosynthesis (Late Stages)	1.16	0.316	0.0741	AADAC,CHST5,GAL3ST2,HS2ST1,HS3ST4,SULT4A1
Neuropathic Pain Signaling In Dorsal Horn Neurons	1.16	0.316	0.0693	CAMK1D,GPR37,GRIN2A,MAPK3,PLCH1,PRKAG1,PRKAR2A
Dolichol and Dolichyl Phosphate Biosynthesis	1.15	0.316	0.5	DHDDS
L-DOPA Degradation	1.15	0.316	0.5	COMT
GDP-L-fucose Biosynthesis I (from GDP-D-mannose)	1.15	0.316	0.5	GFUS
Gluconeogenesis I	1.15	0.316	0.111	ENO1,MDH1,ME2
LPS/IL-1 Mediated Inhibition of RXR Function	1.14	0.31	0.0551	ABCB9,ABCG8,ALDH18A1,ALDH7A1,CHST5,CPT1C,FMO2,GAL3ST2,HS2ST1,HS3ST4,MGST1,NR1H2,SLC27A2,SULT4A1
Sumoylation Pathway	1.12	0.304	0.068	EP300,ETS1,PIAS4,RANGAP1,RNF4,SENP1,SENP6
Coronavirus Replication Pathway	1.12	0.304	0.0889	TUBA1A,TUBA1B,TUBA1C,ZCRB1
RHOA Signaling	1.12	0.304	0.0645	ACTR3,DLC1,MPRIP,NGEF,PI4KA,PIKFYVE,SEPTIN5,TTN
Cardiac Hypertrophy Signaling (Enhanced)	1.1	0.295	0.0479	ADCY2,CACNA1D,CACNA1S,CACNA2D3,EIF2B2,EP300,FGF17,GNB1L,IL17RB,IL31,ITGB6,MAP3K4,MAP3K6,MAPK3,MPPE1,PDE4A,PDE6B,PDE9A,PLCH1,PRKAG1,PRKAR2A,RCAN1,WNT1,WNT10B,WNT3,WNT5A
Integrin Signaling	1.09	0.295	0.0563	ACTR3,ARF3,ARHGAP26,CAPN6,CRKL,ITGB6,MAPK3,MPRIP,PIKFYVE,SOS1,TLN2,TTN
tRNA Splicing	1.09	0.295	0.087	MPPE1,PDE4A,PDE6B,PDE9A
Autophagy	1.07	0.285	0.0558	ARL8B,BIRC6,GABARAPL2,GCG,GNB1L,MAP1LC3B,MAPK3,PPP2R2B,PRKAG1,PRKAR2A,SNAP29,TRAF3
Cardiac Hypertrophy Signaling	1.07	0.285	0.0536	ADCY2,CACNA1D,CACNA1S,CACNA2D3,EIF2B2,EP300,GNB1L,MAP3K4,MAP3K6,MAPK3,PLCH1,PRKAG1,PRKAR2A,SOS1
Phenylalanine Degradation IV (Mammalian, via Side Chain)	1.06	0.285	0.143	HPD,SLC27A2
Colanic Acid Building Blocks Biosynthesis	1.06	0.285	0.143	GFUS,PMM1
Xenobiotic Metabolism AHR Signaling Pathway	1.04	0.285	0.069	ALDH18A1,ALDH7A1,EP300,HSP90AA1,MGST1,SENP1
nNOS Signaling in Skeletal Muscle Cells	1.04	0.285	0.0833	CACNA1D,CACNA1I,CACNA1S,CACNA2D3
PFKFB4 Signaling Pathway	1.04	0.285	0.0833	MAPK3,PFKM,PRKAG1,PRKAR2A
Telomere Extension by Telomerase	1.01	0.285	0.133	TERF2IP,XRCC6
Choline Biosynthesis III	1.01	0.285	0.133	CEPT1,GPLD1
HGF Signaling	1	0.285	0.0606	CDKN1A,CRKL,ETS1,ITGB6,MAP3K4,MAP3K6,MAPK3,SOS1
Actin Cytoskeleton Signaling	0.996	0.285	0.0531	ABI2,ACTR3,CRKL,FGF17,FN1,ITGB6,MAPK3,MPRIP,MYO10,SOS1,TLN2,TRIO,TTN
Unfolded protein response	0.991	0.285	0.0667	DNAJB7,DNAJC13,DNAJC15,DNAJC18,DNAJC8,SEL1L
Diphthamide Biosynthesis	0.987	0.285	0.333	EEF2
Proline Degradation	0.987	0.285	0.333	LOC102724788/PRODH
Thyronamine and Iodothyronamine Metabolism	0.987	0.285	0.333	DIO2
Palmitate Biosynthesis I (Animals)	0.987	0.285	0.333	CBR4
Inosine-5'-phosphate Biosynthesis II	0.987	0.285	0.333	ADSL
Thyroid Hormone Metabolism I (via Deiodination)	0.987	0.285	0.333	DIO2
N-acetylglucosamine Degradation I	0.987	0.285	0.333	GNPDA2
Relaxin Signaling	0.983	0.285	0.0581	ADCY2,GNB1L,MAPK3,MPPE1,PDE4A,PDE6B,PDE9A,PRKAG1,PRKAR2A
Antioxidant Action of Vitamin C	0.975	0.28	0.0625	GPLD1,MAPK3,PLA2R1,PLCH1,SLC23A1,SLC23A2,TXNRD2
D-myo-inositol (1,4,5)-trisphosphate Degradation	0.959	0.268	0.125	IMPA1,SYNJ2
Ephrin Receptor Signaling	0.951	0.265	0.0542	ACTR3,CRKL,EFNA5,EPHB2,GNB1L,GRIN2A,ITGB6,KALRN,MAPK3,NGEF,SOS1
SNARE Signaling Pathway	0.943	0.261	0.0588	ADCY2,MYO10,NSF,PRKAG1,PRKAR2A,RIMS1,SNAP29,SYT17
eNOS Signaling	0.936	0.258	0.0566	ADCY2,AQP5,CASP8,CHRNA7,CHRNB4,ESR1,HSP90AA1,PRKAG1,PRKAR2A
Protein Ubiquitination Pathway	0.932	0.258	0.0509	BIRC6,DNAJB7,DNAJC13,DNAJC15,DNAJC18,DNAJC22,DNAJC8,HSP90AA1,PSMD14,PSMD7,RBX1,UBE2J1,UCHL1,USP4
RAN Signaling	0.914	0.245	0.118	RANBP1,RANGAP1
Inhibition of ARE-Mediated mRNA Degradation Pathway	0.91	0.245	0.0559	EDC4,MAPK3,PAPOLG,PPP2R2B,PRKAG1,PRKAR2A,PSMD14,PSMD7,PSME4
Insulin Receptor Signaling	0.893	0.242	0.0571	CRKL,EIF2B2,MAPK3,PPP1R3A,PRKAG1,PRKAR2A,SOS1,SYNJ2
GPCR-Mediated Integration of Enteroendocrine Signaling Exemplified by an L Cell	0.886	0.242	0.0667	ADCY2,GCG,PLCH1,PRKAG1,PRKAR2A
Lymphotoxin β Receptor Signaling	0.879	0.242	0.0727	DIABLO,EP300,MAPK3,TRAF3
Leptin Signaling in Obesity	0.87	0.242	0.0658	ADCY2,MAPK3,PLCH1,PRKAG1,PRKAR2A
Proline Biosynthesis I	0.87	0.242	0.25	ALDH18A1
N-acetylglucosamine Degradation II	0.87	0.242	0.25	GNPDA2
Huntington's Disease Signaling	0.863	0.242	0.0495	CAPN6,CASP8,CLTCL1,EGFR,EP300,GNB1L,MAPK3,NSF,POLR2I,PSMD14,PSMD7,PSME4,SOS1,ZDHHC17
Melanocyte Development and Pigmentation Signaling	0.86	0.242	0.0612	ADCY2,EP300,MAPK3,PRKAG1,PRKAR2A,SOS1
Role of NANOG in Mammalian Embryonic Stem Cell Pluripotency	0.86	0.242	0.0583	CDX2,MAPK3,SOS1,WNT1,WNT10B,WNT3,WNT5A
Neuroprotective Role of THOP1 in Alzheimer's Disease	0.86	0.242	0.0583	CTRL,DPP4,HTRA3,MAPT,PRKAG1,PRKAR2A,PRSS3
Nitric Oxide Signaling in the Cardiovascular System	0.86	0.242	0.0583	CACNA1D,CACNA1S,CACNA2D3,HSP90AA1,MAPK3,PRKAG1,PRKAR2A
Cell Cycle Control of Chromosomal Replication	0.857	0.242	0.0714	CDC45,POLD1,POLE,RPA2
FAT10 Signaling Pathway	0.857	0.242	0.0714	MAP1LC3B,PSMD14,PSMD7,PSME4
Xenobiotic Metabolism General Signaling Pathway	0.854	0.242	0.0559	ABCA2,EP300,MAP3K4,MAP3K6,MAPK3,MGST1,NR1H2,RBX1
NRF2-mediated Oxidative Stress Response	0.848	0.241	0.0506	ABCC1,DNAJB7,DNAJC13,DNAJC15,DNAJC18,DNAJC8,EP300,HSP90AA1,JUND,MAPK3,MGST1,RBX1
Superpathway of Inositol Phosphate Compounds	0.848	0.241	0.0506	DUSP6,IP6K2,NUDT12,PDCD1,PI4KA,PIKFYVE,PLCH1,PPP1R16B,PPP1R3A,PPP2R2B,SGPP2,SYNJ2
Hepatic Cholestasis	0.836	0.236	0.0524	ABCC1,ABCG8,ADCY2,ESR1,GCG,IL31,MAP3K4,NR1H2,PRKAG1,PRKAR2A
Mitochondrial L-carnitine Shuttle Pathway	0.836	0.236	0.105	CPT1C,SLC27A2
RHOGDI Signaling	0.83	0.235	0.0512	ACTR3,ARHGEF3,CDH23,CDH7,DLC1,EP300,ESR1,GNB1L,ITGB6,PI4KA,PIKFYVE
Hepatic Fibrosis / Hepatic Stellate Cell Activation	0.804	0.224	0.0515	COL4A2,COL5A1,COL6A3,COL6A6,COL8A1,COL9A2,EGFR,FN1,MYO10,TIMP2
Renal Cell Carcinoma Signaling	0.804	0.224	0.0625	EP300,ETS1,MAPK3,RBX1,SOS1
Mitochondrial Dysfunction	0.799	0.224	0.0526	ACO2,CASP8,CPT1C,NDUFA13,NDUFA4,NDUFA6,NDUFB1,PARK7,TXNRD2
Glioblastoma Multiforme Signaling	0.799	0.224	0.0526	CDKN1A,EGFR,MAPK3,PLCH1,SOS1,WNT1,WNT10B,WNT3,WNT5A
Gαs Signaling	0.796	0.224	0.056	ADCY2,CRHR1,GNB1L,HRH2,MAPK3,PRKAG1,PRKAR2A
Regulation of the Epithelial-Mesenchymal Transition Pathway	0.796	0.224	0.0513	EGFR,ETS1,FGF17,MAPK3,NOTCH1,SOS1,WNT1,WNT10B,WNT3,WNT5A
AMPK Signaling	0.785	0.224	0.0492	CAB39,CDKN1A,CHRNA7,CHRNB4,CPT1C,EEF2,EP300,GNB1L,PFKM,PPP2R2B,PRKAG1,PRKAR2A
Creatine-phosphate Biosynthesis	0.78	0.224	0.2	CKB
Lysine Degradation II	0.78	0.224	0.2	ALDH7A1
Myo-inositol Biosynthesis	0.78	0.224	0.2	IMPA1
Lysine Degradation V	0.78	0.224	0.2	ALDH7A1
Tyrosine Degradation I	0.78	0.224	0.2	HPD
JAK/STAT Signaling	0.772	0.223	0.061	CDKN1A,MAPK3,PIAS3,PIAS4,SOS1
GP6 Signaling Pathway	0.772	0.223	0.0551	COL4A2,COL5A1,COL6A3,COL6A6,COL8A1,COL9A2,LAMA5
Semaphorin Neuronal Repulsive Signaling Pathway	0.762	0.217	0.053	FARP2,ITGB6,MAPT,MPRIP,PDE4A,PRKAG1,PRKAR2A,SEMA3E
ID1 Signaling Pathway	0.747	0.206	0.05	BHLHE40,CDKN1A,CHRNA7,CHRNB4,EGFR,EP300,ETS1,FN1,MAPK3,PARK7
Insulin Secretion Signaling Pathway	0.747	0.206	0.0476	ADCY2,CACNA1D,CACNA1I,CACNA1S,CACNA2D3,EIF2B2,GCG,KCNJ11,MAPK3,NSF,PLCH1,PRKAG1,PRKAR2A
Type II Diabetes Mellitus Signaling	0.742	0.205	0.0523	CACNA1D,CACNA1I,CACNA1S,CACNA2D3,KCNJ11,MAPK3,PRKAG1,SLC27A2
Superpathway of D-myo-inositol (1,4,5)-trisphosphate Metabolism	0.735	0.201	0.0909	IMPA1,SYNJ2
FcγRIIB Signaling in B Lymphocytes	0.728	0.198	0.0588	CACNA1D,CACNA1I,CACNA1S,CACNA2D3,SOS1
Synaptic Long Term Potentiation	0.726	0.198	0.0534	EP300,GRIN2A,MAPK3,PLCH1,PPP1R3A,PRKAG1,PRKAR2A
Wound Healing Signaling Pathway	0.719	0.194	0.0476	COL4A2,COL5A1,COL6A3,COL6A6,COL8A1,COL9A2,EGFR,FN1,IL31,LAMA5,MAPK3,SOS1
p70S6K Signaling	0.714	0.194	0.053	EEF2,EGFR,MAPK3,MAPT,PLCH1,PPP2R2B,SOS1
Urea Cycle	0.708	0.194	0.167	CPS1
Chondroitin and Dermatan Biosynthesis	0.708	0.194	0.167	CSGALNACT2
GDP-mannose Biosynthesis	0.708	0.194	0.167	PMM1
Regulation Of The Epithelial Mesenchymal Transition In Development Pathway	0.701	0.19	0.0575	NOTCH1,WNT1,WNT10B,WNT3,WNT5A
Ovarian Cancer Signaling	0.69	0.188	0.0506	EGFR,MAPK3,PRKAG1,PRKAR2A,WNT1,WNT10B,WNT3,WNT5A
BER (Base Excision Repair) Pathway	0.684	0.188	0.0682	MAPK3,POLE,POLG
Aryl Hydrocarbon Receptor Signaling	0.682	0.188	0.0503	ALDH18A1,ALDH7A1,CDKN1A,EP300,ESR1,HSP90AA1,MAPK3,MGST1
STAT3 Pathway	0.682	0.188	0.0519	CDKN1A,EGFR,IL17RB,MAPK3,NDUFA13,PIAS3,PIM1
Phagosome Maturation	0.682	0.188	0.0503	DYNC2H1,MPO,NSF,PIKFYVE,TUBA1A,TUBA1B,TUBA1C,VPS37B
Pyridoxal 5'-phosphate Salvage Pathway	0.68	0.188	0.0606	GRK4,MAP3K6,MAPK3,PIM1
TCA Cycle II (Eukaryotic)	0.678	0.188	0.0833	ACO2,MDH1
Methionine Degradation I (to Homocysteine)	0.678	0.188	0.0833	AHCY,PRMT1
Regulation of Cellular Mechanics by Calpain Protease	0.674	0.188	0.0562	CAPN6,EGFR,ITGB6,MAPK3,TLN2
Remodeling of Epithelial Adherens Junctions	0.65	0.178	0.0588	ACTR3,TUBA1A,TUBA1B,TUBA1C
Thioredoxin Pathway	0.648	0.178	0.143	TXNRD2
Phosphatidylcholine Biosynthesis I	0.648	0.178	0.143	CEPT1
Glycoaminoglycan-protein Linkage Region Biosynthesis	0.648	0.178	0.143	XYLT1
Aspartate Degradation II	0.648	0.178	0.143	MDH1
Apelin Adipocyte Signaling Pathway	0.648	0.178	0.0549	ADCY2,MAPK3,MGST1,PRKAG1,PRKAR2A
SPINK1 General Cancer Pathway	0.635	0.171	0.058	EGFR,MAPK3,PRSS3,SPINK1
Amyotrophic Lateral Sclerosis Signaling	0.631	0.171	0.0517	CACNA1D,CACNA1S,CACNA2D3,CAPN6,GRIN2A,PRPH
Granulocyte Adhesion and Diapedesis	0.631	0.171	0.0476	CLDN5,CX3CL1,CXCL14,FPR1,FPR2,FPR3,HRH2,SDC3,SELE
nNOS Signaling in Neurons	0.629	0.171	0.0638	CAPN6,GRIN2A,PFKM
Estrogen-mediated S-phase Entry	0.625	0.171	0.0769	CDKN1A,ESR1
Cysteine Biosynthesis III (mammalia)	0.625	0.171	0.0769	AHCY,PRMT1
Agrin Interactions at Neuromuscular Junction	0.62	0.171	0.0571	AGRN,EGFR,GABPB1,MAPK3
GM-CSF Signaling	0.62	0.171	0.0571	ETS1,MAPK3,PIM1,SOS1
Glycolysis I	0.602	0.162	0.0741	ENO1,PFKM
Inositol Pyrophosphates Biosynthesis	0.599	0.162	0.125	IP6K2
Clathrin-mediated Endocytosis Signaling	0.597	0.162	0.0466	ACTR3,APOM,CLTCL1,EPHB2,FGF17,GAK,ITGB6,SH3GLB1,STON2
Circadian Rhythm Signaling	0.593	0.162	0.0446	ADCY2,BHLHE40,CACNA1D,CACNA1I,CACNA1S,CACNA2D3,GNB1L,GRIN2A,MAPK3,PLCH1,PRKAG1,PRKAR2A
Melatonin Signaling	0.593	0.162	0.0556	MAPK3,PLCH1,PRKAG1,PRKAR2A
Basal Cell Carcinoma Signaling	0.593	0.162	0.0556	WNT1,WNT10B,WNT3,WNT5A
Ephrin B Signaling	0.593	0.162	0.0556	EPHB2,GNB1L,KALRN,MAPK3
3-phosphoinositide Degradation	0.59	0.162	0.0464	DUSP6,NUDT12,PDCD1,PIKFYVE,PPP1R16B,PPP1R3A,PPP2R2B,SGPP2,SYNJ2
TGF-β Signaling	0.588	0.162	0.0521	AMH,EP300,MAPK3,PIAS4,SOS1
Synaptic Long Term Depression	0.582	0.162	0.0462	CACNA1D,CACNA1I,CACNA1S,CACNA2D3,CRHR1,MAPK3,PLA2R1,PLCH1,PPP2R2B
PPARα/RXRα Activation	0.582	0.162	0.0462	ACAA1,ADCY2,EP300,HSP90AA1,MAPK3,PLCH1,PRKAG1,PRKAR2A,SOS1
Colorectal Cancer Metastasis Signaling	0.582	0.162	0.0443	ADCY2,DCC,EGFR,GNB1L,MAPK3,PRKAG1,PRKAR2A,SOS1,WNT1,WNT10B,WNT3,WNT5A
MYC Mediated Apoptosis Signaling	0.578	0.162	0.06	CASP8,PRKAG1,PRKAR2A
Assembly of RNA Polymerase II Complex	0.578	0.162	0.06	GTF2A1,GTF2H1,POLR2I
p53 Signaling	0.565	0.154	0.051	CDKN1A,EP300,SERPINE2,ST13,THBS1
Endocannabinoid Cancer Inhibition Pathway	0.565	0.154	0.0476	ADCY2,CASP8,CDKN1A,GNB1L,MAPK3,PRKAG1,PRKAR2A
D-myo-inositol-5-phosphate Metabolism	0.559	0.151	0.0455	DUSP6,NUDT12,PDCD1,PIKFYVE,PLCH1,PPP1R16B,PPP1R3A,PPP2R2B,SGPP2
Sonic Hedgehog Signaling	0.558	0.151	0.069	PRKAG1,PRKAR2A
Sphingosine and Sphingosine-1-phosphate Metabolism	0.554	0.151	0.111	SGPP2
Phosphatidylethanolamine Biosynthesis II	0.554	0.151	0.111	CEPT1
Adrenomedullin signaling pathway	0.551	0.15	0.0452	ADCY2,ADM,GPR37,MAPK3,PLCH1,PRKAG1,PRKAR2A,SOS1,TTN
Thrombin Signaling	0.547	0.148	0.0444	ADCY2,ARHGEF3,ARHGEF33,CAMK1D,EGFR,GNB1L,MAPK3,MPRIP,PLCH1,SOS1
GDNF Family Ligand-Receptor Interactions	0.542	0.148	0.0526	DOK3,MAPK3,PDLIM7,SOS1
Hypoxia Signaling in the Cardiovascular System	0.542	0.148	0.0526	BIRC6,EP300,HSP90AA1,UBE2J1
PTEN Signaling	0.541	0.148	0.0467	CDKN1A,EGFR,ITGB6,MAPK3,MCRS1,SOS1,SYNJ2
HER-2 Signaling in Breast Cancer	0.533	0.144	0.0441	ARF3,CDKN1A,EGFR,ETS1,GLE1,GNB1L,ITGB6,MAPK3,NUP85,SOS1
Protein Kinase A Signaling	0.533	0.144	0.0416	ADCY2,AKAP9,DCC,DUSP6,GNB1L,MAPK3,MPPE1,PALM2AKAP2,PDE4A,PDE6B,PDE9A,PLCH1,PPP1R3A,PRKAG1,PRKAR2A,PTPRU,TTN
14-3-3-mediated Signaling	0.521	0.141	0.0472	MAPK3,MAPT,PLCH1,TUBA1A,TUBA1B,TUBA1C
Tight Junction Signaling	0.519	0.141	0.0449	CLDN5,EPB41,MYO10,NSF,PPP2R2B,PRKAG1,PRKAR2A,TJP1
Role of WNT/GSK-3β Signaling in the Pathogenesis of Influenza	0.519	0.141	0.0513	WNT1,WNT10B,WNT3,WNT5A
Sperm Motility	0.519	0.141	0.0431	CACNA1I,DSTYK,EGFR,EPHB2,GNB1L,PDE4A,PLA2R1,PLCH1,PRKAG1,PRKAR2A,TEK
Phototransduction Pathway	0.519	0.141	0.0556	PDE6B,PRKAG1,PRKAR2A
Oxytocin Signaling Pathway	0.513	0.137	0.0426	CACNA1D,CACNA1S,CACNA2D3,EEF2,EGFR,GNB1L,MAPK3,MPRIP,MYO10,PRKAG1,PRKAR2A,SOS1
EGF Signaling	0.504	0.133	0.0545	EGFR,MAPK3,SOS1
Apoptosis Signaling	0.504	0.133	0.0481	BIRC6,CAPN6,CASP8,DIABLO,MAPK3
Dopamine Degradation	0.499	0.13	0.0625	ALDH7A1,COMT
D-myo-inositol (1,4,5,6)-Tetrakisphosphate Biosynthesis	0.489	0.129	0.044	DUSP6,NUDT12,PDCD1,PIKFYVE,PPP1R16B,PPP1R3A,PPP2R2B,SGPP2
D-myo-inositol (3,4,5,6)-tetrakisphosphate Biosynthesis	0.489	0.129	0.044	DUSP6,NUDT12,PDCD1,PIKFYVE,PPP1R16B,PPP1R3A,PPP2R2B,SGPP2
3-phosphoinositide Biosynthesis	0.488	0.129	0.0433	DUSP6,NUDT12,PDCD1,PI4KA,PIKFYVE,PPP1R16B,PPP1R3A,PPP2R2B,SGPP2
fMLP Signaling in Neutrophils	0.487	0.129	0.0458	ACTR3,FPR1,FPR2,FPR3,GNB1L,MAPK3
Estrogen-Dependent Breast Cancer Signaling	0.485	0.129	0.0494	DHRS11,EGFR,ESR1,MAPK3
Epithelial Adherens Junction Signaling	0.484	0.129	0.0446	ACTR3,EGFR,FARP2,NOTCH1,PPP2R2B,PRKAG1,WWC1
Purine Nucleotides De Novo Biosynthesis II	0.483	0.129	0.0909	ADSL
CD27 Signaling in Lymphocytes	0.479	0.129	0.0526	CASP8,MAP3K4,MAP3K6
Role of CHK Proteins in Cell Cycle Checkpoint Control	0.479	0.129	0.0526	CDKN1A,PPP2R2B,TLK1
Molecular Mechanisms of Cancer	0.478	0.129	0.0403	ADCY2,ARHGEF3,CASP8,CDKN1A,DIABLO,EP300,GNB1L,ITGB6,MAPK3,NOTCH1,PRKAG1,PRKAR2A,RASGRP1,SOS1,WNT1,WNT10B,WNT3,WNT5A
P2Y Purigenic Receptor Signaling Pathway	0.471	0.124	0.0451	ADCY2,GNB1L,MAPK3,PLCH1,PRKAG1,PRKAR2A
α-Adrenergic Signaling	0.466	0.121	0.0463	ADCY2,GNB1L,MAPK3,PRKAG1,PRKAR2A
Inhibition of Angiogenesis by TSP1	0.465	0.121	0.0588	CD47,THBS1
TR/RXR Activation	0.453	0.114	0.0476	COL6A3,DIO2,ENO1,EP300
Triacylglycerol Degradation	0.453	0.114	0.0508	AADAC,ABHD16A,DAGLA
Fatty Acid β-oxidation I	0.449	0.111	0.0571	ACAA1,SLC27A2
HIPPO signaling	0.444	0.108	0.0471	PPP1R3A,PPP2R2B,TEAD2,WWC1
SPINK1 Pancreatic Cancer Pathway	0.441	0.108	0.05	CTRL,PRSS3,SPINK1
Kinetochore Metaphase Signaling Pathway	0.44	0.108	0.045	CENPT,DNAH1,DNAH10,DNAH3,PPP1R3A
FGF Signaling	0.434	0.106	0.0465	CRKL,FGF17,MAPK3,SOS1
PDGF Signaling	0.434	0.106	0.0465	CRKL,MAPK3,SOS1,SYNJ2
RAC Signaling	0.432	0.105	0.0435	ABI2,ACTR3,ITGB6,MAPK3,PI4KA,PIKFYVE
Assembly of RNA Polymerase III Complex	0.425	0.103	0.0769	GTF3A
UDP-N-acetyl-D-galactosamine Biosynthesis II	0.425	0.103	0.0769	GNPDA2
BMP signaling pathway	0.425	0.103	0.046	MAPK3,PRKAG1,PRKAR2A,SOS1
Cell Cycle Regulation by BTG Family Proteins	0.418	0.102	0.0541	PPP2R2B,PRMT1
TWEAK Signaling	0.418	0.102	0.0541	CASP8,TRAF3
Noradrenaline and Adrenaline Degradation	0.418	0.102	0.0541	ALDH7A1,COMT
Thrombopoietin Signaling	0.408	0.0964	0.0476	MAPK3,MPL,SOS1
IL-17A Signaling in Fibroblasts	0.403	0.0964	0.0526	IL17RB,MAPK3
Regulation of Actin-based Motility by Rho	0.399	0.0964	0.0431	ACTR3,ITGB6,MPRIP,PI4KA,PIKFYVE
Bladder Cancer Signaling	0.399	0.0964	0.0431	CDKN1A,EGFR,FGF17,MAPK3,THBS1
DNA Double-Strand Break Repair by Non-Homologous End Joining	0.399	0.0964	0.0714	XRCC6
Role of IL-17A in Psoriasis	0.399	0.0964	0.0714	IL17RB
Glycogen Degradation III	0.399	0.0964	0.0714	MGAM
Oxytocin In Brain Signaling Pathway	0.393	0.0958	0.0406	CACNA1D,CACNA1I,CACNA1S,CACNA2D3,EGFR,GNB1L,MAPK3,PLA2R1
tRNA Charging	0.389	0.0958	0.0513	KARS1,NARS2
Superpathway of Methionine Degradation	0.389	0.0958	0.0513	AHCY,PRMT1
Acute Myeloid Leukemia Signaling	0.388	0.0958	0.044	FLT3,MAPK3,PIM1,SOS1
Germ Cell-Sertoli Cell Junction Signaling	0.387	0.0958	0.0409	MAP3K4,MAP3K6,MAPK3,TJP1,TUBA1A,TUBA1B,TUBA1C
PXR/RXR Activation	0.386	0.0958	0.0462	ABCB9,PRKAG1,PRKAR2A
Activation of IRF by Cytosolic Pattern Recognition Receptors	0.386	0.0958	0.0462	IFIH1,TANK,TRAF3
PI3K/AKT Signaling	0.381	0.0942	0.0402	CDKN1A,HSP90AA1,IL17RB,ITGB6,MAPK3,PPP2R2B,SOS1,SYNJ2
Fatty Acid Activation	0.377	0.0942	0.0667	SLC27A2
Leukotriene Biosynthesis	0.377	0.0942	0.0667	DPEP2
WNT/Ca+ pathway	0.377	0.0942	0.0455	PDE6B,PLCH1,WNT5A
Glutamate Receptor Signaling	0.377	0.0942	0.0455	GNB1L,GRIN2A,HOMER2
Pyroptosis Signaling Pathway	0.372	0.0931	0.043	CASP8,PRKAG1,PRKAR2A,TRAF3
NGF Signaling	0.37	0.0931	0.0417	MAP3K4,MAP3K6,MAPK3,SOS1,TRIO
CD40 Signaling	0.367	0.0931	0.0448	MAPK3,TANK,TRAF3
Phospholipases	0.367	0.0931	0.0448	GPLD1,PLA2R1,PLCH1
Fcγ Receptor-mediated Phagocytosis in Macrophages and Monocytes	0.364	0.0931	0.0426	ACTR3,GPLD1,MAPK3,TLN2
Non-Small Cell Lung Cancer Signaling	0.364	0.0931	0.0426	EGFR,FHIT,MAPK3,SOS1
Coronavirus Pathogenesis Pathway	0.359	0.0931	0.0394	CASP8,EP300,MAPK3,OAS3,PIKFYVE,RPS21,STING1,TRAF3
Eicosanoid Signaling	0.358	0.0931	0.0441	DPEP2,FPR2,PLA2R1
Renin-Angiotensin Signaling	0.356	0.0931	0.041	ADCY2,MAPK3,PRKAG1,PRKAR2A,SOS1
Granzyme B Signaling	0.356	0.0931	0.0625	CASP8
Mismatch Repair in Eukaryotes	0.356	0.0931	0.0625	POLD1
Chondroitin Sulfate Degradation (Metazoa)	0.356	0.0931	0.0625	HEXB
IL-1 Signaling	0.348	0.0872	0.0417	ADCY2,GNB1L,PRKAG1,PRKAR2A
Glioma Signaling	0.342	0.0851	0.0403	CAMK1D,CDKN1A,EGFR,MAPK3,SOS1
B Cell Activating Factor Signaling	0.34	0.0851	0.0465	TNFRSF13C,TRAF3
Oncostatin M Signaling	0.34	0.0851	0.0465	MAPK3,SOS1
1D-myo-inositol Hexakisphosphate Biosynthesis II (Mammalian)	0.336	0.0851	0.0588	SYNJ2
Dermatan Sulfate Degradation (Metazoa)	0.336	0.0851	0.0588	HEXB
D-myo-inositol (1,3,4)-trisphosphate Biosynthesis	0.336	0.0851	0.0588	SYNJ2
Factors Promoting Cardiogenesis in Vertebrates	0.333	0.0835	0.0392	PLCH1,SCN5A,WNT1,WNT10B,WNT3,WNT5A
Salvage Pathways of Pyrimidine Ribonucleotides	0.333	0.0835	0.0408	GRK4,MAP3K6,MAPK3,PIM1
Pancreatic Adenocarcinoma Signaling	0.329	0.0825	0.0397	CDKN1A,EGFR,GPLD1,MAPK3,NOTCH1
Endocannabinoid Developing Neuron Pathway	0.322	0.0773	0.0394	ADCY2,GNB1L,MAPK3,PRKAG1,PRKAR2A
Serotonin Receptor Signaling	0.319	0.0747	0.0444	ADCY2,SLC6A4
Signaling by Rho Family GTPases	0.312	0.0696	0.0373	ACTR3,ARHGEF3,CDH23,CDH7,GNB1L,ITGB6,MAPK3,PI4KA,PIKFYVE,SEPTIN5
Apelin Pancreas Signaling Pathway	0.308	0.0675	0.0435	PRKAG1,PRKAR2A
Senescence Pathway	0.304	0.066	0.0369	BHLHE40,CACNA1D,CACNA1S,CACNA2D3,CAPN6,CDKN1A,EP300,ETS1,MAPK3,PPP2R2B,STING1
Granzyme A Signaling	0.302	0.066	0.0526	EP300
γ-linolenate Biosynthesis II (Animals)	0.302	0.066	0.0526	SLC27A2
Role of IL-17F in Allergic Inflammatory Airway Diseases	0.298	0.065	0.0426	IL17RB,MAPK3
Ephrin A Signaling	0.298	0.065	0.0426	EFNA5,NGEF
Glucocorticoid Receptor Signaling	0.295	0.0645	0.0361	CDKN1A,DNAH1,DNAH10,DNAH3,EGFR,EP300,ESR1,GABPB1,GTF2A1,GTF2H1,HSP90AA1,IL17RB,MAPK3,NDUFA13,NDUFA4,NDUFA6,NDUFB1,POLR2I,PRKAG1,SELE,SOS1
Ferroptosis Signaling Pathway	0.292	0.0645	0.0379	ARF3,CDKN1A,DPP4,MAPK3,PRKAG1
IGF-1 Signaling	0.292	0.0645	0.0385	MAPK3,PRKAG1,PRKAR2A,SOS1
Apelin Muscle Signaling Pathway	0.288	0.0645	0.0417	GNB1L,PRKAG1
Glutaryl-CoA Degradation	0.287	0.0645	0.05	PARK7
Inflammasome pathway	0.287	0.0645	0.05	CASP8
Antiproliferative Role of Somatostatin Receptor 2	0.283	0.0645	0.039	CDKN1A,GNB1L,MAPK3
Production of Nitric Oxide and Reactive Oxygen Species in Macrophages	0.28	0.0645	0.0366	APOM,MAP3K4,MAP3K6,MAPK3,MPO,PPP1R3A,PPP2R2B
Spliceosomal Cycle	0.279	0.0645	0.0408	PRPF40B,SF3A2
Endothelin-1 Signaling	0.276	0.0645	0.0365	ADCY2,CASP8,GPLD1,MAPK3,PLA2R1,PLCH1,SOS1
Neurotrophin/TRK Signaling	0.276	0.0645	0.0385	MAPK3,SOS1,SPRY2
Chronic Myeloid Leukemia Signaling	0.273	0.0645	0.0374	CDKN1A,CRKL,MAPK3,SOS1
PPAR Signaling	0.273	0.0645	0.0374	EP300,HSP90AA1,MAPK3,SOS1
Histamine Degradation	0.272	0.0645	0.0476	ALDH7A1
Fatty Acid α-oxidation	0.272	0.0645	0.0476	ALDH7A1
Leukocyte Extravasation Signaling	0.271	0.0645	0.0363	CLDN5,CRKL,CTNNA3,DLC1,MAP3K4,RASGRP1,TIMP2
Role of PKR in Interferon Induction and Antiviral Response	0.271	0.0645	0.0368	CASP8,HSP90AA1,IFIH1,MAPK3,TRAF3
Melanoma Signaling	0.27	0.0645	0.04	CDKN1A,MAPK3
Cell Cycle: G2/M DNA Damage Checkpoint Regulation	0.27	0.0645	0.04	CDKN1A,EP300
IL-3 Signaling	0.268	0.0645	0.038	CRKL,MAPK3,SOS1
UVC-Induced MAPK Signaling	0.262	0.0605	0.0392	EGFR,MAPK3
Chemokine Signaling	0.262	0.0605	0.0375	CAMK1D,MAPK3,MPRIP
Putrescine Degradation III	0.26	0.0595	0.0455	ALDH7A1
BEX2 Signaling Pathway	0.255	0.0575	0.037	CDKN1A,ITGB6,PPP2R2B
TNFR1 Signaling	0.253	0.0575	0.0385	CASP8,TANK
UVB-Induced MAPK Signaling	0.253	0.0575	0.0385	EGFR,MAPK3
Oxidative Phosphorylation	0.25	0.0565	0.036	NDUFA13,NDUFA4,NDUFA6,NDUFB1
FLT3 Signaling in Hematopoietic Progenitor Cells	0.249	0.0565	0.0366	FLT3,MAPK3,SOS1
Pyrimidine Deoxyribonucleotides De Novo Biosynthesis I	0.247	0.0565	0.0435	RRM1
Apelin Cardiac Fibroblast Signaling Pathway	0.247	0.0565	0.0435	PRKAG1
IL-22 Signaling	0.235	0.0487	0.0417	MAPK3
Tumoricidal Function of Hepatic Natural Killer Cells	0.235	0.0487	0.0417	CASP8
Ethanol Degradation IV	0.235	0.0487	0.0417	ALDH7A1
Role of JAK family kinases in IL-6-type Cytokine Signaling	0.224	0.0405	0.04	MAPK3
CDP-diacylglycerol Biosynthesis I	0.224	0.0405	0.04	CRLS1
NAD Salvage Pathway II	0.204	0.0259	0.037	NUDT12
Tryptophan Degradation X (Mammalian, via Tryptamine)	0.204	0.0259	0.037	ALDH7A1
Phosphatidylglycerol Biosynthesis II (Non-plastidic)	0.204	0.0259	0.037	CRLS1
Tryptophan Degradation III (Eukaryotic)	0.204	0.0259	0.037	PARK7
Glutathione Redox Reactions I	0.194	0.0177	0.0357	MGST1
NAD Signaling Pathway	0	0	0.0331	BST1,NUDT12,POLR2I,PRKAG1,SLC29A3
CLEAR Signaling Pathway	0	0	0.0316	EGFR,EP300,GNB1L,HEXB,MAPK3,NPRL2,PPP2R2B,PRKAG1,SESN2
IL-13 Signaling Pathway	0	0	0.0345	CLCA1,IL17RB,MAPK3,POSTN
Oxytocin In Spinal Neurons Signaling Pathway	0	0	0.0286	KCNJ11
Natural Killer Cell Signaling	0	0	0.0201	MAP3K4,MAP3K6,MAPK3,SOS1
Fc Epsilon RI Signaling	0	0	0.0254	MAPK3,SOS1,SYNJ2
Coagulation System	0	0	0.0286	SERPIND1
Acute Phase Response Signaling	0	0	0.0216	FN1,MAPK3,SERPIND1,SOS1
LXR/RXR Activation	0	0	0.0244	ABCG8,APOM,NR1H2
VDR/RXR Activation	0	0	0.0256	CDKN1A,EP300
FXR/RXR Activation	0	0	0.0159	ABCG8,APOM
Ceramide Signaling	0	0	0.0333	DIABLO,MAPK3,PPP2R2B
Role of BRCA1 in DNA Damage Response	0	0	0.0125	CDKN1A
RAR Activation	0	0	0.0343	ADCY2,EP300,GTF2H1,NSD1,PRKAG1,PRKAR2A,PRMT1
Erythropoietin Signaling Pathway	0	0	0.0226	IL31,MAPK3,SOS1,WNT1
Caveolar-mediated Endocytosis Signaling	0	0	0.0267	EGFR,ITGB6
IL-8 Signaling	0	0	0.0286	EGFR,GNB1L,GPLD1,MAPK3,MPO,TEK
IL-12 Signaling and Production in Macrophages	0	0	0.0221	APOM,EP300,MAPK3
Role of Pattern Recognition Receptors in Recognition of Bacteria and Viruses	0	0	0.0256	IFIH1,IL31,MAPK3,OAS3
TREM1 Signaling	0	0	0.026	MAPK3,MPO
MIF Regulation of Innate Immunity	0	0	0.0227	MAPK3
Role of NFAT in Regulation of the Immune Response	0	0	0.00679	GNB1L,MAPK3,RCAN1,SOS1
LPS-stimulated MAPK Signaling	0	0	0.0118	MAPK3
NF-κB Activation by Viruses	0	0	0.0128	MAPK3
CCR5 Signaling in Macrophages	0	0	0.01	CACNA1D,CACNA1I,CACNA1S,CACNA2D3,GNB1L
Calcium-induced T Lymphocyte Apoptosis	0	0	0.00217	EP300
Cytotoxic T Lymphocyte-mediated Apoptosis of Target Cells	0	0	0.00235	CASP8
IL-17 Signaling	0	0	0.0214	HSP90AA1,IL17RB,IL31,MAPK3
Airway Pathology in Chronic Obstructive Pulmonary Disease	0	0	0.0339	APOM,FGF17,IL31,MPO
CXCR4 Signaling	0	0	0.0178	ADCY2,GNB1L,MAPK3
4-1BB Signaling in T Lymphocytes	0	0	0.0294	MAPK3
CTLA4 Signaling in Cytotoxic T Lymphocytes	0	0	0.00418	CLTCL1,PPP2R2B
Induction of Apoptosis by HIV1	0	0	0.0308	CASP8,DIABLO
IL-15 Production	0	0	0.0325	DSTYK,EGFR,EPHB2,TEK
CCR3 Signaling in Eosinophils	0	0	0.0222	GNB1L,MAPK3,MPRIP
CD28 Signaling in T Helper Cells	0	0	0.00193	ACTR3
IL-15 Signaling	0	0	0.00379	GNB1L,MAPK3
Virus Entry via Endocytic Pathways	0	0	0.0192	CLTCL1,ITGB6
Dendritic Cell Maturation	0	0	0.00507	LY75,MAPK3,PLCH1
Mechanisms of Viral Exit from Host Cells	0	0	0.0244	SH3GLB1
HIF1α Signaling	0	0	0.0337	ADM,CAMK1D,CDKN1A,EP300,HSP90AA1,MAPK3,RBX1
Angiopoietin Signaling	0	0	0.026	SOS1,TEK
CNTF Signaling	0	0	0.0351	MAPK3,SOS1
Semaphorin Signaling in Neurons	0	0	0.0161	MAPK3
Mitotic Roles of Polo-Like Kinase	0	0	0.0303	HSP90AA1,PPP2R2B
HMGB1 Signaling	0	0	0.018	IL31,MAPK3,SELE
Polyamine Regulation in Colon Cancer	0	0	0.0345	GNB1L,MAPK3
Cholecystokinin/Gastrin-mediated Signaling	0	0	0.0252	EGFR,MAPK3,SOS1
Human Embryonic Stem Cell Pluripotency	0	0	0.0301	GNB1L,WNT1,WNT10B,WNT3,WNT5A
ATM Signaling	0	0	0.0303	CDKN1A,PPP2R2B,TLK1
Growth Hormone Signaling	0	0	0.0141	MAPK3
Prolactin Signaling	0	0	0.0349	EP300,MAPK3,SOS1
Prostate Cancer Signaling	0	0	0.0351	CDKN1A,HSP90AA1,MAPK3,SOS1
Type I Diabetes Mellitus Signaling	0	0	0.00393	CASP8,ICA1
Small Cell Lung Cancer Signaling	0	0	0.0312	FHIT,PIAS3,TRAF3
Endometrial Cancer Signaling	0	0	0.0333	MAPK3,SOS1
Primary Immunodeficiency Signaling	0	0	0.0179	TNFRSF13C
Autoimmune Thyroid Disease Signaling	0	0	0.0022	TSHR
Thyroid Cancer Signaling	0	0	0.0127	MAPK3
Gα12/13 Signaling	0	0	0.0226	CDH23,CDH7,MAPK3
ERK5 Signaling	0	0	0.0135	EGFR
mTOR Signaling	0	0	0.033	GNB1L,GPLD1,MAPK3,PPP2R2B,PRKAG1,RICTOR,RPS21
G Protein Signaling Mediated by Tubby	0	0	0.0227	GNB1L
Communication between Innate and Adaptive Immune Cells	0	0	0.00108	TNFRSF13C
Sphingosine-1-phosphate Signaling	0	0	0.0333	ADCY2,CASP8,MAPK3,PLCH1
Crosstalk between Dendritic Cells and Natural Killer Cells	0	0	0.011	TLN2
Systemic Lupus Erythematosus Signaling	0	0	0.00965	MAPK3,PRPF40B,SNU13,SOS1,TNFRSF13C,ZCRB1
CDC42 Signaling	0	0	0.00522	ACTR3,ITGB6,MPRIP
ILK Signaling	0	0	0.03	FN1,ITGB6,MAPK3,MYO10,PPP2R2B,RICTOR
FAK Signaling	0	0	0.0288	ACTR3,CAPN6,CELSR3,CRHR1,CRKL,DRD2,EFNA5,EGFR,ETS1,FFAR3,FPR1,FPR2,FPR3,GPR149,GPR157,GPR37,GPR63,GPR75,GPR89A/GPR89B,HRH2,IL17RB,ITGB6,MAPK3,MCHR1,OPRD1,OPRK1,OPRM1,PCDH12,SOS1,TSHR
EIF2 Signaling	0	0	0.0179	EIF2B2,MAPK3,RPS21,SOS1
April Mediated Signaling	0	0	0.0238	TRAF3
Retinoic acid Mediated Apoptosis Signaling	0	0	0.0167	CASP8
PAK Signaling	0	0	0.0254	ITGB6,MAPK3,SOS1
Hereditary Breast Cancer Signaling	0	0	0.0211	CDKN1A,EP300,POLR2I
Role of Osteoblasts, Osteoclasts and Chondrocytes in Rheumatoid Arthritis	0	0	0.0223	MAPK3,WNT1,WNT10B,WNT3,WNT5A
Phospholipase C Signaling	0	0	0.0133	ADCY2,ARHGEF3,EP300,GNB1L,GPLD1,ITGB6,MAPK3,MPRIP,SOS1
Altered T Cell and B Cell Signaling in Rheumatoid Arthritis	0	0	0.00407	TNFRSF13C,TRAF3
Atherosclerosis Signaling	0	0	0.0229	APOM,PLA2R1,SELE
Role of Macrophages, Fibroblasts and Endothelial Cells in Rheumatoid Arthritis	0	0	0.0335	FN1,IL17RB,MAPK3,PLCH1,PRSS3,SELE,TRAF3,WNT1,WNT10B,WNT3,WNT5A
Regulation of eIF4 and p70S6K Signaling	0	0	0.0335	EIF2B2,ITGB6,MAPK3,PPP2R2B,RPS21,SOS1
Glioma Invasiveness Signaling	0	0	0.0274	MAPK3,TIMP2
RANK Signaling in Osteoclasts	0	0	0.033	MAP3K4,MAP3K6,MAPK3
Regulation of IL-2 Expression in Activated and Anergic T Lymphocytes	0	0	0.00434	MAPK3,SOS1
NUR77 Signaling in T Lymphocytes	0	0	0.00391	EP300,MAPK3
PKCθ Signaling in T Lymphocytes	0	0	0.0143	CACNA1D,CACNA1I,CACNA1S,CACNA2D3,MAP3K4,MAP3K6,MAPK3,SOS1
Role of MAPK Signaling in the Pathogenesis of Influenza	0	0	0.0244	MAPK3,PLA2R1
TNFR2 Signaling	0	0	0.0312	TANK
Role of PI3K/AKT Signaling in the Pathogenesis of Influenza	0	0	0.0303	CRKL,MAPK3
Role of Hypercytokinemia/hyperchemokinemia in the Pathogenesis of Influenza	0	0	0.0116	OAS3
Antiproliferative Role of TOB in T Cell Signaling	0	0	0.00235	DPP7
OX40 Signaling Pathway	0	0	0.00209	TRAF3
PI3K Signaling in B Lymphocytes	0	0	0.014	MAPK3,PLCH1
MIF-mediated Glucocorticoid Regulation	0	0	0.0278	MAPK3
Cyclins and Cell Cycle Regulation	0	0	0.0238	CDKN1A,PPP2R2B
Role of Tissue Factor in Cancer	0	0	0.0172	EGFR,MAPK3
IL-17A Signaling in Airway Cells	0	0	0.0299	IL17RB,MAPK3
Role of IL-17A in Arthritis	0	0	0.0351	IL17RB,MAPK3
Role of JAK1 and JAK3 in γc Cytokine Signaling	0	0	0.0145	MAPK3
Actin Nucleation by ARP-WASP Complex	0	0	0.0323	ACTR3,ITGB6,SOS1
Paxillin Signaling	0	0	0.0278	ITGB6,SOS1,TLN2
Mouse Embryonic Stem Cell Pluripotency	0	0	0.0192	MAPK3,SOS1
Transcriptional Regulatory Network in Embryonic Stem Cells	0	0	0.0185	CDX2
VEGF Family Ligand-Receptor Interactions	0	0	0.0238	MAPK3,SOS1
ERBB Signaling	0	0	0.0319	EGFR,MAPK3,SOS1
ERB2-ERBB3 Signaling	0	0	0.0308	MAPK3,SOS1
ERBB4 Signaling	0	0	0.0294	MAPK3,SOS1
GADD45 Signaling	0	0	0.0333	CDKN1A,MAP3K4
Thyroid Hormone Metabolism II (via Conjugation and/or Degradation)	0	0	0.025	DIO2
Ubiquinol-10 Biosynthesis (Eukaryotic)	0	0	0.0333	URAD
Estrogen Biosynthesis	0	0	0.0222	DHRS11
Glutathione-mediated Detoxification	0	0	0.027	MGST1
Nicotine Degradation II	0	0	0.0152	FMO2
Serotonin Degradation	0	0	0.0141	ALDH7A1
Retinol Biosynthesis	0	0	0.0213	AADAC
Triacylglycerol Biosynthesis	0	0	0.0196	CRLS1
Methylglyoxal Degradation III	0	0	0.0323	DHRS11
Superpathway of Melatonin Degradation	0	0	0.0149	MPO
Stearate Biosynthesis I (Animals)	0	0	0.0308	DHRS11,SLC27A2
Acetone Degradation I (to Methylglyoxal)	0	0	0.0238	DHRS11
Oxidative Ethanol Degradation III	0	0	0.0179	ALDH7A1
Ethanol Degradation II	0	0	0.0294	ALDH7A1
Gαq Signaling	0	0	0.0176	GNB1L,GPLD1,MAPK3
Inhibition of Matrix Metalloproteases	0	0	0.0256	TIMP2
PEDF Signaling	0	0	0.0238	CASP8,MAPK3
Agranulocyte Adhesion and Diapedesis	0	0	0.028	CLDN5,CX3CL1,CXCL14,FN1,MYO10,SELE
TEC Kinase Signaling	0	0	0.00345	GNB1L,ITGB6
UVA-Induced MAPK Signaling	0	0	0.0306	EGFR,MAPK3,PLCH1
Adipogenesis pathway	0	0	0.0296	GTF2H1,RUNX1T1,WNT10B,WNT5A
Cell Cycle: G1/S Checkpoint Regulation	0	0	0.0147	CDKN1A
SAPK/JNK Signaling	0	0	0.00797	CRKL,GNB1L,MAP3K4,SOS1
IL-2 Signaling	0	0	0.0328	MAPK3,SOS1
IL-4 Signaling	0	0	0.0215	SOS1,SYNJ2
B Cell Receptor Signaling	0	0	0.00951	ETS1,MAP3K4,MAP3K6,MAPK3,SOS1,SYNJ2
WNT/β-catenin Signaling	0	0	0.0347	EP300,PPP2R2B,WNT1,WNT10B,WNT3,WNT5A
Death Receptor Signaling	0	0	0.0312	CASP8,DIABLO,TANK
p38 MAPK Signaling	0	0	0.00833	MAPT
Notch Signaling	0	0	0.0263	NOTCH1
NF-κB Signaling	0	0	0.00877	CASP8,EGFR,EP300,TANK,TRAF3
VEGF Signaling	0	0	0.0303	EIF2B2,MAPK3,SOS1
T Cell Receptor Signaling	0	0	0.00814	DUSP6,GNB1L,MAPK3,RASGRP1,SOS1
IL-6 Signaling	0	0	0.0156	MAPK3,SOS1
Macropinocytosis Signaling	0	0	0.0263	ITGB6,MRC1
PD-1, PD-L1 cancer immunotherapy pathway	0	0	0.0189	PDCD1,RASGRP1
Cancer Drug Resistance By Drug Efflux	0	0	0.0345	ABCC1,MAPK3
Th1 and Th2 Activation Pathway	0	0	0.0174	IL17RB,IL31,NOTCH1
Th1 Pathway	0	0	0.0082	NOTCH1
Th2 Pathway	0	0	0.0219	IL17RB,IL31,NOTCH1
Osteoarthritis Pathway	0	0	0.0212	CASP8,FN1,ITGB6,NOTCH1,PRKAG1
IL-7 Signaling Pathway	0	0	0.0256	MAPK3,SOS1
Neuroinflammation Signaling Pathway	0	0	0.0347	BIRC6,CASP8,CX3CL1,GABRA2,GABRB3,GABRG1,GRIN2A,MAPK3,MAPT,TRAF3,WNT1
Iron homeostasis signaling pathway	0	0	0.0216	ACO2,EGFR,MAPK3
Th17 Activation Pathway	0	0	0.00207	HSP90AA1
Apelin Cardiomyocyte Signaling Pathway	0	0	0.0202	MAPK3,PLCH1
Apelin Endothelial Signaling Pathway	0	0	0.0355	ADCY2,GNB1L,MAPK3,PRKAG1,TEK
T Cell Exhaustion Signaling Pathway	0	0	0.00707	FOXP1,MAPK3,PDCD1,PPP2R2B
Systemic Lupus Erythematosus In T Cell Signaling Pathway	0	0	0.00936	CASP8,ESR1,GNB1L,MAPK3,PPP2R2B,SOS1
Systemic Lupus Erythematosus In B Cell Signaling Pathway	0	0	0.0138	IFIH1,IL31,MAPK3,PDCD1,RASGRP1,SOS1,STING1,SYNJ2,TNFRSF13C,TRAF3
Hepatic Fibrosis Signaling Pathway	0	0	0.0308	CACNA1D,CACNA1S,CACNA2D3,ITGB6,MAPK3,PRKAG1,PRKAR2A,SOS1,TTN,WNT1,WNT10B,WNT3,WNT5A
Necroptosis Signaling Pathway	0	0	0.0127	CAPN6,CASP8
Regulation Of The Epithelial Mesenchymal Transition By Growth Factors Pathway	0	0	0.026	EGFR,ETS1,FGF17,MAPK3,SOS1
Tumor Microenvironment Pathway	0	0	0.0168	FGF17,FN1,MAPK3
MSP-RON Signaling In Cancer Cells Pathway	0	0	0.0286	EGFR,ETS1,MAPK3,SOS1
MSP-RON Signaling In Macrophages Pathway	0	0	0.0168	MAPK3,SOS1
Role of MAPK Signaling in Promoting the Pathogenesis of Influenza	0	0	0.0177	MAPK3,PLA2R1
Role of MAPK Signaling in Inhibiting the Pathogenesis of Influenza	0	0	0.026	MAPK3,PLA2R1

## Sheet: S3-b. Diseases and Functions
Main Category	Categories	Functions	Diseases or Functions Annotation	p-value	B-H p-value	Molecules	# Molecules
Diseases and Disorders	Cancer,Organismal Injury and Abnormalities	non-melanoma solid tumor	Non-melanoma solid tumor	1.87e-52	3e-48	AADAC,ABCA2,ABCA7,ABCB9,ABCC1,ABCC6,ABCF2,ABCG8,ABHD16A,ABI2,ACAA1,ACO2,ACTR3,ACTR8,ADAM23,ADAMTS6,ADAT1,ADCY2,ADM,ADRM1,ADSL,AEBP1,AFF3,AGBL4,AGRN,AHCY,AIFM3,AKAP9,ALDH18A1,ALDH7A1,ALKBH6,ALPK3,AMH,ANK3,ANKRD34C,ANKRD45,AP3B2,AQP5,ARF3,ARHGAP26,ARHGEF3,ARHGEF33,ARIH2OS,ARL5A,ARL8B,ARVCF,ASB3/GPR75-ASB3,ASB8,ASH1L,ASPN,ASTN2,ATN1,ATP5IF1,B3GNT4,BAG5,BAZ2B,BBX,BCL11A,BCL7A,BEND4,BHLHE40,BIRC6,BMS1…	820
Diseases and Disorders	Cancer,Organismal Injury and Abnormalities	nonhematologic malignant neoplasm	Nonhematologic malignant neoplasm	5.98e-52	4.8e-48	AADAC,ABCA2,ABCA7,ABCB9,ABCC1,ABCC6,ABCF2,ABCG8,ABHD16A,ABI2,ACAA1,ACO2,ACTR3,ACTR8,ADAM23,ADAMTS6,ADAT1,ADCY2,ADM,ADRM1,ADSL,AEBP1,AFF3,AGBL4,AGRN,AHCY,AIFM3,AKAP9,ALDH18A1,ALDH7A1,ALKBH6,ALPK3,AMH,ANK3,ANKRD34C,ANKRD45,AP3B2,AQP5,ARF3,ARHGAP26,ARHGEF3,ARHGEF33,ARIH2OS,ARL5A,ARL8B,ARVCF,ASB3/GPR75-ASB3,ASB8,ASH1L,ASPN,ASTN2,ATN1,ATP5IF1,B3GNT4,BAG5,BAZ2B,BBX,BCL11A,BCL7A,BEND4,BHLHE40,BIRC6,BMS1…	820
Diseases and Disorders	Cancer,Organismal Injury and Abnormalities	non-hematological solid tumor	Non-hematological solid tumor	1.7e-51	9.09e-48	AADAC,ABCA2,ABCA7,ABCB9,ABCC1,ABCC6,ABCF2,ABCG8,ABHD16A,ABI2,ACAA1,ACO2,ACTR3,ACTR8,ADAM23,ADAMTS6,ADAT1,ADCY2,ADM,ADRM1,ADSL,AEBP1,AFF3,AGBL4,AGRN,AHCY,AIFM3,AKAP9,ALDH18A1,ALDH7A1,ALKBH6,ALPK3,AMH,ANK3,ANKRD34C,ANKRD45,AP3B2,AQP5,ARF3,ARHGAP26,ARHGEF3,ARHGEF33,ARIH2OS,ARL5A,ARL8B,ARVCF,ASB3/GPR75-ASB3,ASB8,ASH1L,ASPN,ASTN2,ATN1,ATP5IF1,B3GNT4,BAG5,BAZ2B,BBX,BCL11A,BCL7A,BEND4,BHLHE40,BIRC6,BMS1…	821
Diseases and Disorders	Cancer,Organismal Injury and Abnormalities	neoplasia	Epithelial neoplasm	2.43e-51	9.75e-48	AADAC,ABCA2,ABCA7,ABCB9,ABCC1,ABCC6,ABCF2,ABCG8,ABHD16A,ABI2,ACAA1,ACO2,ACTR3,ACTR8,ADAM23,ADAMTS6,ADAT1,ADCY2,ADM,ADRM1,ADSL,AEBP1,AFF3,AGBL4,AGRN,AHCY,AIFM3,AKAP9,ALDH18A1,ALDH7A1,ALKBH6,ALPK3,AMH,ANK3,ANKRD34C,ANKRD45,AP3B2,AQP5,ARF3,ARHGAP26,ARHGEF3,ARHGEF33,ARIH2OS,ARL5A,ARL8B,ARVCF,ASB3/GPR75-ASB3,ASB8,ASH1L,ASPN,ASTN2,ATN1,ATP5IF1,B3GNT4,BAG5,BAZ2B,BBX,BCL11A,BCL7A,BEND4,BHLHE40,BIRC6,BMS1…	814
Diseases and Disorders	Cancer,Organismal Injury and Abnormalities	carcinoma	Carcinoma	4.69e-51	1.51e-47	AADAC,ABCA2,ABCA7,ABCB9,ABCC1,ABCC6,ABCF2,ABCG8,ABHD16A,ABI2,ACAA1,ACO2,ACTR3,ACTR8,ADAM23,ADAMTS6,ADAT1,ADCY2,ADM,ADRM1,ADSL,AEBP1,AFF3,AGBL4,AGRN,AHCY,AIFM3,AKAP9,ALDH18A1,ALDH7A1,ALKBH6,ALPK3,AMH,ANK3,ANKRD34C,ANKRD45,AP3B2,AQP5,ARF3,ARHGAP26,ARHGEF3,ARHGEF33,ARIH2OS,ARL5A,ARL8B,ARVCF,ASB3/GPR75-ASB3,ASB8,ASH1L,ASPN,ASTN2,ATN1,ATP5IF1,B3GNT4,BAG5,BAZ2B,BBX,BCL11A,BCL7A,BEND4,BHLHE40,BIRC6,BMS1…	813
Diseases and Disorders	Cancer,Organismal Injury and Abnormalities	head and neck neoplasia	Head and neck tumor	6.37e-50	1.7e-46	AADAC,ABCA2,ABCA7,ABCB9,ABCC1,ABCC6,ABCF2,ABCG8,ABHD16A,ABI2,ACAA1,ACO2,ACTR3,ACTR8,ADAM23,ADAMTS6,ADAT1,ADCY2,ADM,ADRM1,ADSL,AEBP1,AFF3,AGBL4,AGRN,AHCY,AIFM3,AKAP9,ALDH18A1,ALDH7A1,ALKBH6,ALPK3,AMH,ANK3,ANKRD34C,ANKRD45,AP3B2,AQP5,ARF3,ARHGAP26,ARHGEF3,ARHGEF33,ARIH2OS,ARL5A,ARL8B,ARVCF,ASB3/GPR75-ASB3,ASH1L,ASPN,ASTN2,ATN1,B3GNT4,BAG5,BAZ2B,BBX,BCL11A,BCL7A,BEND4,BHLHE40,BIRC6,BMS1,BNC1,BPIFB3,…	760
Diseases and Disorders	Cancer,Organismal Injury and Abnormalities	cancer	Cancer of secretory structure	5.96e-49	1.37e-45	AADAC,ABCA2,ABCA7,ABCB9,ABCC1,ABCC6,ABCF2,ABCG8,ABHD16A,ABI2,ACAA1,ACO2,ACTR3,ADAM23,ADAMTS6,ADAT1,ADCY2,ADRM1,ADSL,AEBP1,AFF3,AGBL4,AGRN,AHCY,AIFM3,AKAP9,ALDH18A1,ALDH7A1,ALKBH6,ALPK3,AMH,ANK3,AP3B2,AQP5,ARHGAP26,ARHGEF3,ARHGEF33,ARIH2OS,ARL5A,ARL8B,ARVCF,ASB3/GPR75-ASB3,ASH1L,ASPN,ASTN2,ATN1,B3GNT4,BAZ2B,BBX,BCL11A,BCL7A,BEND4,BHLHE40,BIRC6,BMS1,BNC1,BPIFB3,BRPF3,BST1,C10orf67,C12orf54,C1QL4,C2…	734
Diseases and Disorders	Cancer,Organismal Injury and Abnormalities	malignant solid tumor	Malignant solid tumor	5.86e-46	1.17e-42	AADAC,ABCA2,ABCA7,ABCB9,ABCC1,ABCC6,ABCF2,ABCG8,ABHD16A,ABI2,ACAA1,ACO2,ACTR3,ACTR8,ADAM23,ADAMTS6,ADAT1,ADCY2,ADM,ADRM1,ADSL,AEBP1,AFF3,AGBL4,AGRN,AHCY,AIFM3,AKAP9,ALDH18A1,ALDH7A1,ALKBH6,ALPK3,AMH,ANK3,ANKRD34C,ANKRD45,AP3B2,AQP5,ARF3,ARHGAP26,ARHGEF3,ARHGEF33,ARIH2OS,ARL5A,ARL8B,ARVCF,ASB3/GPR75-ASB3,ASB8,ASH1L,ASPN,ASTN2,ATN1,ATP5IF1,B3GNT4,BAG5,BAZ2B,BBX,BCL11A,BCL7A,BEND4,BHLHE40,BIRC6,BMS1…	821
Diseases and Disorders	Cancer,Organismal Injury and Abnormalities	extracranial solid tumor	Extracranial solid tumor	2.18e-45	3.89e-42	AADAC,ABCA2,ABCA7,ABCB9,ABCC1,ABCC6,ABCF2,ABCG8,ABHD16A,ABI2,ACAA1,ACO2,ACTR3,ACTR8,ADAM23,ADAMTS6,ADAT1,ADCY2,ADM,ADRM1,ADSL,AEBP1,AFF3,AGBL4,AGRN,AHCY,AIFM3,AKAP9,ALDH18A1,ALDH7A1,ALKBH6,ALPK3,AMH,ANK3,ANKRD34C,ANKRD45,AP3B2,AQP5,ARF3,ARHGAP26,ARHGEF3,ARHGEF33,ARIH2OS,ARL5A,ARL8B,ARVCF,ASB3/GPR75-ASB3,ASB8,ASH1L,ASPN,ASTN2,ATN1,ATP5IF1,B3GNT4,BAG5,BAZ2B,BBX,BCL11A,BCL7A,BEND4,BHLHE40,BIRC6,BMS1…	819
Diseases and Disorders	Cancer,Organismal Injury and Abnormalities	cancer	Cancer	4.13e-45	6.63e-42	AADAC,ABCA2,ABCA7,ABCB9,ABCC1,ABCC6,ABCF2,ABCG8,ABHD16A,ABI2,ACAA1,ACO2,ACTR3,ACTR8,ADAM23,ADAMTS6,ADAT1,ADCY2,ADM,ADRM1,ADSL,AEBP1,AFF3,AGBL4,AGRN,AHCY,AIFM3,AKAP9,ALDH18A1,ALDH7A1,ALKBH6,ALPK3,AMH,ANK3,ANKRD34C,ANKRD45,AP3B2,AQP5,ARF3,ARHGAP26,ARHGEF3,ARHGEF33,ARIH2OS,ARL5A,ARL8B,ARVCF,ASB3/GPR75-ASB3,ASB8,ASH1L,ASPN,ASTN2,ATN1,ATP5IF1,B3GNT4,BAG5,BAZ2B,BBX,BCL11A,BCL7A,BEND4,BHLHE40,BIRC6,BMS1…	822
Diseases and Disorders	Cancer,Organismal Injury and Abnormalities	solid tumor	Solid tumor	4.98e-45	7.26e-42	AADAC,ABCA2,ABCA7,ABCB9,ABCC1,ABCC6,ABCF2,ABCG8,ABHD16A,ABI2,ACAA1,ACO2,ACTR3,ACTR8,ADAM23,ADAMTS6,ADAT1,ADCY2,ADM,ADRM1,ADSL,AEBP1,AFF3,AGBL4,AGRN,AHCY,AIFM3,AKAP9,ALDH18A1,ALDH7A1,ALKBH6,ALPK3,AMH,ANK3,ANKRD34C,ANKRD45,AP3B2,AQP5,ARF3,ARHGAP26,ARHGEF3,ARHGEF33,ARIH2OS,ARL5A,ARL8B,ARVCF,ASB3/GPR75-ASB3,ASB8,ASH1L,ASPN,ASTN2,ATN1,ATP5IF1,B3GNT4,BAG5,BAZ2B,BBX,BCL11A,BCL7A,BEND4,BHLHE40,BIRC6,BMS1…	822
Diseases and Disorders	Organismal Injury and Abnormalities	abdominal lesion	Abdominal lesion	5.6e-45	7.29e-42	AADAC,ABCA2,ABCA7,ABCB9,ABCC1,ABCC6,ABCF2,ABCG8,ABHD16A,ABI2,ACAA1,ACO2,ACTR3,ACTR8,ADAM23,ADAMTS6,ADAT1,ADCY2,ADM,ADRM1,ADSL,AEBP1,AFF3,AGBL4,AGRN,AHCY,AIFM3,AKAP9,ALDH18A1,ALDH7A1,ALKBH6,ALPK3,AMH,ANK3,ANKRD34C,ANKRD45,AP3B2,ARF3,ARHGAP26,ARHGEF3,ARHGEF33,ARIH2OS,ARL5A,ARL8B,ARVCF,ASB3/GPR75-ASB3,ASB8,ASH1L,ASPN,ASTN2,ATN1,ATP5IF1,B3GNT4,BAG5,BAZ2B,BBX,BCL11A,BCL7A,BEND4,BHLHE40,BIRC6,BMS1,BNC1…	789
Diseases and Disorders	Cancer,Organismal Injury and Abnormalities	abdominal cancer	Abdominal cancer	5.9e-45	7.29e-42	AADAC,ABCA2,ABCA7,ABCB9,ABCC1,ABCC6,ABCF2,ABCG8,ABHD16A,ABI2,ACAA1,ACO2,ACTR3,ACTR8,ADAM23,ADAMTS6,ADAT1,ADCY2,ADM,ADRM1,ADSL,AEBP1,AFF3,AGBL4,AGRN,AHCY,AIFM3,AKAP9,ALDH18A1,ALDH7A1,ALKBH6,ALPK3,AMH,ANK3,ANKRD34C,ANKRD45,AP3B2,ARF3,ARHGAP26,ARHGEF3,ARHGEF33,ARL5A,ARL8B,ARVCF,ASB3/GPR75-ASB3,ASB8,ASH1L,ASPN,ASTN2,ATN1,ATP5IF1,B3GNT4,BAG5,BAZ2B,BBX,BCL11A,BCL7A,BEND4,BHLHE40,BIRC6,BMS1,BNC1,BPIFB3,…	783
Diseases and Disorders	Cancer,Endocrine System Disorders,Organismal Injury and Abnormalities	epithelial thyroid cancer	Thyroid carcinoma	9.37e-45	1.07e-41	AADAC,ABCA2,ABCA7,ABCB9,ABCC1,ABCC6,ABCF2,ABCG8,ABHD16A,ABI2,ACAA1,ACO2,ACTR3,ADAM23,ADAMTS6,ADAT1,ADCY2,ADRM1,ADSL,AEBP1,AFF3,AGBL4,AGRN,AHCY,AIFM3,AKAP9,ALDH18A1,ALDH7A1,ALKBH6,ALPK3,AMH,ANK3,AP3B2,AQP5,ARHGAP26,ARHGEF3,ARHGEF33,ARIH2OS,ARL5A,ARL8B,ARVCF,ASB3/GPR75-ASB3,ASH1L,ASPN,ASTN2,ATN1,BAZ2B,BBX,BCL11A,BCL7A,BEND4,BIRC6,BMS1,BPIFB3,BRPF3,BST1,C12orf54,C1QL4,C22orf39,C4orf48,CAB39,CABLES2,…	681
Diseases and Disorders	Cancer,Organismal Injury and Abnormalities	abdominal neoplasm	Abdominal neoplasm	6.45e-44	6.9e-41	AADAC,ABCA2,ABCA7,ABCB9,ABCC1,ABCC6,ABCF2,ABCG8,ABHD16A,ABI2,ACAA1,ACO2,ACTR3,ACTR8,ADAM23,ADAMTS6,ADAT1,ADCY2,ADM,ADRM1,ADSL,AEBP1,AFF3,AGBL4,AGRN,AHCY,AIFM3,AKAP9,ALDH18A1,ALDH7A1,ALKBH6,ALPK3,AMH,ANK3,ANKRD34C,ANKRD45,AP3B2,ARF3,ARHGAP26,ARHGEF3,ARHGEF33,ARIH2OS,ARL5A,ARL8B,ARVCF,ASB3/GPR75-ASB3,ASB8,ASH1L,ASPN,ASTN2,ATN1,ATP5IF1,B3GNT4,BAG5,BAZ2B,BBX,BCL11A,BCL7A,BEND4,BHLHE40,BIRC6,BMS1,BNC1…	786
Diseases and Disorders	Cancer,Organismal Injury and Abnormalities	abdominal adenocarcinoma	Abdominal adenocarcinoma	1.82e-43	1.74e-40	AADAC,ABCA2,ABCA7,ABCB9,ABCC1,ABCC6,ABCF2,ABHD16A,ABI2,ACAA1,ACO2,ACTR3,ACTR8,ADAM23,ADAMTS6,ADAT1,ADCY2,ADM,ADRM1,ADSL,AEBP1,AFF3,AGBL4,AGRN,AHCY,AKAP9,ALDH18A1,ALDH7A1,ALKBH6,ALPK3,AMH,ANK3,ANKRD34C,ANKRD45,AP3B2,ARF3,ARHGAP26,ARHGEF3,ARHGEF33,ARL5A,ARL8B,ARVCF,ASB3/GPR75-ASB3,ASB8,ASH1L,ASPN,ASTN2,ATN1,ATP5IF1,B3GNT4,BAG5,BAZ2B,BBX,BCL11A,BEND4,BHLHE40,BIRC6,BMS1,BNC1,BPIFB3,BRPF3,BST1,C10orf6…	743
Diseases and Disorders	Cancer,Organismal Injury and Abnormalities	abdominal carcinoma	Abdominal carcinoma	1.84e-43	1.74e-40	AADAC,ABCA2,ABCA7,ABCB9,ABCC1,ABCC6,ABCF2,ABCG8,ABHD16A,ABI2,ACAA1,ACO2,ACTR3,ACTR8,ADAM23,ADAMTS6,ADAT1,ADCY2,ADM,ADRM1,ADSL,AEBP1,AFF3,AGBL4,AGRN,AHCY,AIFM3,AKAP9,ALDH18A1,ALDH7A1,ALKBH6,ALPK3,AMH,ANK3,ANKRD34C,ANKRD45,AP3B2,ARF3,ARHGAP26,ARHGEF3,ARHGEF33,ARL5A,ARL8B,ARVCF,ASB3/GPR75-ASB3,ASB8,ASH1L,ASPN,ASTN2,ATN1,ATP5IF1,B3GNT4,BAG5,BAZ2B,BBX,BCL11A,BEND4,BHLHE40,BIRC6,BMS1,BNC1,BPIFB3,BRPF3,…	767
Diseases and Disorders	Cancer,Endocrine System Disorders,Organismal Injury and Abnormalities	endocrine carcinoma	Endocrine carcinoma	3.28e-43	2.93e-40	AADAC,ABCA2,ABCA7,ABCB9,ABCC1,ABCC6,ABCF2,ABCG8,ABHD16A,ABI2,ACAA1,ACO2,ACTR3,ADAM23,ADAMTS6,ADAT1,ADCY2,ADRM1,ADSL,AEBP1,AFF3,AGBL4,AGRN,AHCY,AIFM3,AKAP9,ALDH18A1,ALDH7A1,ALKBH6,ALPK3,AMH,ANK3,AP3B2,AQP5,ARHGAP26,ARHGEF3,ARHGEF33,ARIH2OS,ARL5A,ARL8B,ARVCF,ASB3/GPR75-ASB3,ASH1L,ASPN,ASTN2,ATN1,BAZ2B,BBX,BCL11A,BCL7A,BEND4,BIRC6,BMS1,BPIFB3,BRPF3,BST1,C12orf54,C1QL4,C22orf39,C4orf48,CAB39,CABLES2,…	698
Diseases and Disorders	Cancer,Organismal Injury and Abnormalities	adenocarcinoma	Adenocarcinoma	4.25e-43	3.59e-40	AADAC,ABCA2,ABCA7,ABCB9,ABCC1,ABCC6,ABCF2,ABHD16A,ABI2,ACAA1,ACO2,ACTR3,ACTR8,ADAM23,ADAMTS6,ADAT1,ADCY2,ADM,ADRM1,ADSL,AEBP1,AFF3,AGBL4,AGRN,AHCY,AKAP9,ALDH18A1,ALDH7A1,ALKBH6,ALPK3,AMH,ANK3,ANKRD34C,ANKRD45,AP3B2,ARF3,ARHGAP26,ARHGEF3,ARHGEF33,ARL5A,ARL8B,ARVCF,ASB3/GPR75-ASB3,ASB8,ASH1L,ASPN,ASTN2,ATN1,ATP5IF1,B3GNT4,BAG5,BAZ2B,BBX,BCL11A,BEND4,BHLHE40,BIRC6,BMS1,BNC1,BPIFB3,BRPF3,BST1,C10orf6…	752
Diseases and Disorders	Cancer,Endocrine System Disorders,Organismal Injury and Abnormalities	nonpituitary endocrine tumor	Nonpituitary endocrine tumor	9.39e-43	7.54e-40	AADAC,ABCA2,ABCA7,ABCB9,ABCC1,ABCC6,ABCF2,ABCG8,ABHD16A,ABI2,ACAA1,ACO2,ACTR3,ADAM23,ADAMTS6,ADAT1,ADCY2,ADRM1,ADSL,AEBP1,AFF3,AGBL4,AGRN,AHCY,AIFM3,AKAP9,ALDH18A1,ALDH7A1,ALKBH6,ALPK3,AMH,ANK3,AP3B2,AQP5,ARHGAP26,ARHGEF3,ARHGEF33,ARIH2OS,ARL5A,ARL8B,ARVCF,ASB3/GPR75-ASB3,ASH1L,ASPN,ASTN2,ATN1,BAZ2B,BBX,BCL11A,BCL7A,BEND4,BIRC6,BMS1,BPIFB3,BRPF3,BST1,C12orf54,C1QL4,C22orf39,C4orf48,CAB39,CABLES2,…	687
Diseases and Disorders	Cancer,Organismal Injury and Abnormalities	extrapancreatic malignant tumor	Extrapancreatic malignant tumor	9.88e-43	7.56e-40	AADAC,ABCA2,ABCA7,ABCB9,ABCC1,ABCC6,ABCF2,ABCG8,ABHD16A,ABI2,ACAA1,ACO2,ACTR3,ACTR8,ADAM23,ADAMTS6,ADAT1,ADCY2,ADM,ADRM1,ADSL,AEBP1,AFF3,AGBL4,AGRN,AHCY,AIFM3,AKAP9,ALDH18A1,ALDH7A1,ALKBH6,ALPK3,AMH,ANK3,ANKRD34C,ANKRD45,AP3B2,ARF3,ARHGAP26,ARHGEF3,ARHGEF33,ARL5A,ARL8B,ARVCF,ASB3/GPR75-ASB3,ASB8,ASH1L,ASPN,ASTN2,ATN1,ATP5IF1,B3GNT4,BAG5,BAZ2B,BBX,BCL11A,BCL7A,BEND4,BHLHE40,BIRC6,BMS1,BNC1,BPIFB3,…	802
Diseases and Disorders	Cancer,Organismal Injury and Abnormalities	neck neoplasm	Neck neoplasm	2.73e-42	1.99e-39	AADAC,ABCA2,ABCA7,ABCB9,ABCC1,ABCC6,ABCF2,ABCG8,ABHD16A,ABI2,ACAA1,ACO2,ACTR3,ADAM23,ADAMTS6,ADAT1,ADCY2,ADRM1,ADSL,AEBP1,AFF3,AGBL4,AGRN,AHCY,AIFM3,AKAP9,ALDH18A1,ALDH7A1,ALKBH6,ALPK3,AMH,ANK3,AP3B2,AQP5,ARHGAP26,ARHGEF3,ARHGEF33,ARIH2OS,ARL5A,ARL8B,ARVCF,ASB3/GPR75-ASB3,ASH1L,ASPN,ASTN2,ATN1,BAZ2B,BBX,BCL11A,BCL7A,BEND4,BIRC6,BMS1,BPIFB3,BRPF3,BST1,C12orf54,C1QL4,C22orf39,C4orf48,CAB39,CABLES2,…	682
Diseases and Disorders	Cancer,Organismal Injury and Abnormalities	intraabdominal organ tumor	Intraabdominal organ tumor	5.6e-42	3.91e-39	AADAC,ABCA2,ABCA7,ABCB9,ABCC1,ABCC6,ABCF2,ABCG8,ABHD16A,ABI2,ACAA1,ACO2,ACTR3,ACTR8,ADAM23,ADAMTS6,ADAT1,ADCY2,ADM,ADRM1,ADSL,AEBP1,AFF3,AGBL4,AGRN,AHCY,AIFM3,AKAP9,ALDH18A1,ALDH7A1,ALKBH6,ALPK3,AMH,ANK3,ANKRD34C,ANKRD45,AP3B2,ARF3,ARHGAP26,ARHGEF3,ARHGEF33,ARIH2OS,ARL5A,ARL8B,ARVCF,ASB3/GPR75-ASB3,ASB8,ASH1L,ASPN,ASTN2,ATN1,ATP5IF1,B3GNT4,BAG5,BAZ2B,BBX,BCL11A,BCL7A,BEND4,BHLHE40,BIRC6,BMS1,BNC1…	776
Diseases and Disorders	Cancer,Organismal Injury and Abnormalities	head and neck cancer	Head and neck cancer	6.3e-42	4.21e-39	AADAC,ABCA2,ABCA7,ABCB9,ABCC1,ABCC6,ABCF2,ABCG8,ABHD16A,ABI2,ACAA1,ACO2,ACTR3,ACTR8,ADAM23,ADAMTS6,ADAT1,ADCY2,ADM,ADRM1,ADSL,AEBP1,AFF3,AGBL4,AGRN,AHCY,AIFM3,AKAP9,ALDH18A1,ALDH7A1,ALKBH6,ALPK3,AMH,ANK3,AP3B2,AQP5,ARF3,ARHGAP26,ARHGEF3,ARHGEF33,ARIH2OS,ARL5A,ARL8B,ARVCF,ASB3/GPR75-ASB3,ASH1L,ASPN,ASTN2,ATN1,B3GNT4,BAG5,BAZ2B,BBX,BCL11A,BCL7A,BEND4,BHLHE40,BIRC6,BMS1,BNC1,BPIFB3,BRPF3,BST1,C10orf…	717
Diseases and Disorders	Cancer,Organismal Injury and Abnormalities	head and neck carcinoma	Head and neck carcinoma	1.42e-41	8.77e-39	AADAC,ABCA2,ABCA7,ABCB9,ABCC1,ABCC6,ABCF2,ABCG8,ABHD16A,ABI2,ACAA1,ACO2,ACTR3,ADAM23,ADAMTS6,ADAT1,ADCY2,ADRM1,ADSL,AEBP1,AFF3,AGBL4,AGRN,AHCY,AIFM3,AKAP9,ALDH18A1,ALDH7A1,ALKBH6,ALPK3,AMH,ANK3,AP3B2,AQP5,ARHGAP26,ARHGEF3,ARHGEF33,ARIH2OS,ARL5A,ARL8B,ARVCF,ASB3/GPR75-ASB3,ASH1L,ASPN,ASTN2,ATN1,BAZ2B,BBX,BCL11A,BCL7A,BEND4,BIRC6,BMS1,BPIFB3,BRPF3,BST1,C12orf54,C1QL4,C22orf39,C4orf48,CAB39,CABLES2,…	700
Diseases and Disorders	Cancer,Endocrine System Disorders,Organismal Injury and Abnormalities	endocrine gland tumor	Endocrine gland tumor	1.42e-41	8.77e-39	AADAC,ABCA2,ABCA7,ABCB9,ABCC1,ABCC6,ABCF2,ABCG8,ABHD16A,ABI2,ACAA1,ACO2,ACTR3,ADAM23,ADAMTS6,ADAT1,ADCY2,ADRM1,ADSL,AEBP1,AFF3,AGBL4,AGRN,AHCY,AIFM3,AKAP9,ALDH18A1,ALDH7A1,ALKBH6,ALPK3,AMH,ANK3,AP3B2,AQP5,ARHGAP26,ARHGEF3,ARHGEF33,ARIH2OS,ARL5A,ARL8B,ARVCF,ASB3/GPR75-ASB3,ASH1L,ASPN,ASTN2,ATN1,BAZ2B,BBX,BCL11A,BCL7A,BEND4,BIRC6,BMS1,BPIFB3,BRPF3,BST1,C12orf54,C1QL4,C22orf39,C4orf48,CAB39,CABLES2,…	701
Diseases and Disorders	Cancer,Gastrointestinal Disease,Organismal Injury and Abnormalities	gastrointestinal adenocarcinoma	Gastrointestinal adenocarcinoma	2.56e-41	1.52e-38	AADAC,ABCA2,ABCA7,ABCB9,ABCC1,ABCC6,ABCF2,ABHD16A,ABI2,ACAA1,ACO2,ACTR8,ADAM23,ADAMTS6,ADCY2,ADM,ADRM1,ADSL,AEBP1,AFF3,AGBL4,AGRN,AHCY,AKAP9,ALDH18A1,ALKBH6,ALPK3,AMH,ANK3,ANKRD34C,ANKRD45,AP3B2,ARF3,ARHGAP26,ARHGEF3,ARHGEF33,ARL5A,ARVCF,ASB3/GPR75-ASB3,ASB8,ASH1L,ASPN,ASTN2,ATN1,B3GNT4,BAG5,BAZ2B,BBX,BCL11A,BEND4,BHLHE40,BIRC6,BMS1,BNC1,BPIFB3,BRPF3,BST1,C1QL4,CAB39,CABLES2,CACNA1D,CACNA1I,CACNA…	678
Diseases and Disorders	Cancer,Gastrointestinal Disease,Organismal Injury and Abnormalities	gastrointestinal carcinoma	Gastrointestinal carcinoma	5.04e-41	2.89e-38	AADAC,ABCA2,ABCA7,ABCB9,ABCC1,ABCC6,ABCF2,ABCG8,ABHD16A,ABI2,ACAA1,ACO2,ACTR8,ADAM23,ADAMTS6,ADCY2,ADM,ADRM1,ADSL,AEBP1,AFF3,AGBL4,AGRN,AHCY,AKAP9,ALDH18A1,ALKBH6,ALPK3,AMH,ANK3,ANKRD34C,ANKRD45,AP3B2,ARF3,ARHGAP26,ARHGEF3,ARHGEF33,ARL5A,ARVCF,ASB3/GPR75-ASB3,ASB8,ASH1L,ASPN,ASTN2,ATN1,ATP5IF1,B3GNT4,BAG5,BAZ2B,BBX,BCL11A,BEND4,BHLHE40,BIRC6,BMS1,BNC1,BPIFB3,BRPF3,BST1,C10orf67,C1QL4,CAB39,CABLES…	699
Diseases and Disorders	Cancer,Gastrointestinal Disease,Organismal Injury and Abnormalities	neoplasia	Gastrointestinal tumor	2.14e-39	1.18e-36	AADAC,ABCA2,ABCA7,ABCB9,ABCC1,ABCC6,ABCF2,ABCG8,ABHD16A,ABI2,ACAA1,ACO2,ACTR8,ADAM23,ADAMTS6,ADCY2,ADM,ADRM1,ADSL,AEBP1,AFF3,AGBL4,AGRN,AHCY,AKAP9,ALDH18A1,ALKBH6,ALPK3,AMH,ANK3,ANKRD34C,ANKRD45,AP3B2,ARF3,ARHGAP26,ARHGEF3,ARHGEF33,ARL5A,ARVCF,ASB3/GPR75-ASB3,ASB8,ASH1L,ASPN,ASTN2,ATN1,ATP5IF1,B3GNT4,BAG5,BAZ2B,BBX,BCL11A,BCL7A,BEND4,BHLHE40,BIRC6,BMS1,BNC1,BPIFB3,BRPF3,BST1,C10orf67,C1QL4,CAB39,…	714
Diseases and Disorders	Cancer,Gastrointestinal Disease,Organismal Injury and Abnormalities	gastrointestinal tract cancer	Gastrointestinal tract cancer	8.94e-39	4.78e-36	AADAC,ABCA2,ABCA7,ABCB9,ABCC1,ABCC6,ABCF2,ABCG8,ABHD16A,ABI2,ACAA1,ACO2,ACTR8,ADAM23,ADAMTS6,ADCY2,ADM,ADRM1,ADSL,AEBP1,AFF3,AGBL4,AGRN,AHCY,AKAP9,ALDH18A1,ALKBH6,ALPK3,AMH,ANK3,ANKRD34C,ANKRD45,AP3B2,ARF3,ARHGAP26,ARHGEF3,ARHGEF33,ARL5A,ARVCF,ASB3/GPR75-ASB3,ASB8,ASH1L,ASPN,ASTN2,ATN1,ATP5IF1,B3GNT4,BAG5,BAZ2B,BBX,BCL11A,BCL7A,BEND4,BHLHE40,BIRC6,BMS1,BNC1,BPIFB3,BRPF3,BST1,C10orf67,C1QL4,CAB39,…	711
Diseases and Disorders	Cancer,Gastrointestinal Disease,Organismal Injury and Abnormalities	intestinal adenocarcinoma	Intestinal adenocarcinoma	1.07e-38	5.52e-36	ABCA2,ABCA7,ABCB9,ABCC1,ABCC6,ABCF2,ABHD16A,ABI2,ACAA1,ACO2,ACTR8,ADAM23,ADAMTS6,ADCY2,ADM,ADRM1,ADSL,AEBP1,AFF3,AGBL4,AGRN,AHCY,AKAP9,ALDH18A1,ALKBH6,ALPK3,AMH,ANK3,ANKRD34C,ANKRD45,AP3B2,ARF3,ARHGAP26,ARHGEF3,ARHGEF33,ARL5A,ARVCF,ASB3/GPR75-ASB3,ASB8,ASH1L,ASPN,ASTN2,ATN1,B3GNT4,BAG5,BAZ2B,BBX,BCL11A,BEND4,BHLHE40,BIRC6,BMS1,BNC1,BPIFB3,BRPF3,BST1,C1QL4,CAB39,CABLES2,CACNA1D,CACNA1I,CACNA1S,CAC…	657
Diseases and Disorders	Cancer,Organismal Injury and Abnormalities	formation	Formation of solid tumor	1.85e-38	9.27e-36	AADAC,ABCA2,ABCA7,ABCB9,ABCC1,ABCC6,ABCF2,ABCG8,ABI2,ACAA1,ACO2,ACTR3,ACTR8,ADAM23,ADAMTS6,ADCY2,ADM,ADSL,AEBP1,AFF3,AGBL4,AGRN,AHCY,AIFM3,AKAP9,ALDH18A1,ALDH7A1,ALKBH6,ALPK3,AMH,ANK3,ANKRD34C,ANKRD45,AP3B2,ARF3,ARHGAP26,ARHGEF3,ARHGEF33,ARL8B,ARVCF,ASB3/GPR75-ASB3,ASH1L,ASPN,ASTN2,ATN1,ATP5IF1,B3GNT4,BAG5,BAZ2B,BBX,BCL11A,BCL7A,BEND4,BHLHE40,BIRC6,BMS1,BNC1,BPIFB3,BRPF3,BST1,C10orf67,C1QL4,C2orf…	733
Diseases and Disorders	Cancer,Gastrointestinal Disease,Organismal Injury and Abnormalities	intestinal carcinoma	Intestinal carcinoma	1.91e-38	9.27e-36	ABCA2,ABCA7,ABCB9,ABCC1,ABCC6,ABCF2,ABHD16A,ABI2,ACAA1,ACO2,ACTR8,ADAM23,ADAMTS6,ADCY2,ADM,ADRM1,ADSL,AEBP1,AFF3,AGBL4,AGRN,AHCY,AKAP9,ALDH18A1,ALKBH6,ALPK3,AMH,ANK3,ANKRD34C,ANKRD45,AP3B2,ARF3,ARHGAP26,ARHGEF3,ARHGEF33,ARL5A,ARVCF,ASB3/GPR75-ASB3,ASB8,ASH1L,ASPN,ASTN2,ATN1,ATP5IF1,B3GNT4,BAG5,BAZ2B,BBX,BCL11A,BEND4,BHLHE40,BIRC6,BMS1,BNC1,BPIFB3,BRPF3,BST1,C1QL4,CAB39,CABLES2,CACNA1D,CACNA1I,CAC…	660
Diseases and Disorders	Cancer,Gastrointestinal Disease,Organismal Injury and Abnormalities	large intestine adenocarcinoma	Large intestine adenocarcinoma	1.98e-38	9.37e-36	ABCA2,ABCA7,ABCB9,ABCC1,ABCC6,ABCF2,ABHD16A,ABI2,ACAA1,ACO2,ACTR8,ADAM23,ADAMTS6,ADCY2,ADM,ADRM1,ADSL,AEBP1,AFF3,AGBL4,AGRN,AHCY,AKAP9,ALDH18A1,ALKBH6,ALPK3,AMH,ANK3,ANKRD34C,ANKRD45,AP3B2,ARF3,ARHGAP26,ARHGEF3,ARHGEF33,ARL5A,ARVCF,ASB3/GPR75-ASB3,ASB8,ASH1L,ASPN,ASTN2,ATN1,B3GNT4,BAG5,BAZ2B,BBX,BCL11A,BEND4,BHLHE40,BIRC6,BMS1,BNC1,BPIFB3,BRPF3,BST1,C1QL4,CAB39,CABLES2,CACNA1D,CACNA1I,CACNA1S,CAC…	656
Diseases and Disorders	Cancer,Gastrointestinal Disease,Organismal Injury and Abnormalities	large intestine carcinoma	Large intestine carcinoma	3.45e-38	1.58e-35	ABCA2,ABCA7,ABCB9,ABCC1,ABCC6,ABCF2,ABHD16A,ABI2,ACAA1,ACO2,ACTR8,ADAM23,ADAMTS6,ADCY2,ADM,ADRM1,ADSL,AEBP1,AFF3,AGBL4,AGRN,AHCY,AKAP9,ALDH18A1,ALKBH6,ALPK3,AMH,ANK3,ANKRD34C,ANKRD45,AP3B2,ARF3,ARHGAP26,ARHGEF3,ARHGEF33,ARL5A,ARVCF,ASB3/GPR75-ASB3,ASB8,ASH1L,ASPN,ASTN2,ATN1,ATP5IF1,B3GNT4,BAG5,BAZ2B,BBX,BCL11A,BEND4,BHLHE40,BIRC6,BMS1,BNC1,BPIFB3,BRPF3,BST1,C1QL4,CAB39,CABLES2,CACNA1D,CACNA1I,CAC…	659
Diseases and Disorders	Cancer,Gastrointestinal Disease,Organismal Injury and Abnormalities	digestive organ tumor	Digestive organ tumor	1.66e-36	7.4e-34	AADAC,ABCA2,ABCA7,ABCB9,ABCC1,ABCC6,ABCF2,ABCG8,ABHD16A,ABI2,ACAA1,ACO2,ACTR3,ACTR8,ADAM23,ADAMTS6,ADAT1,ADCY2,ADM,ADRM1,ADSL,AEBP1,AFF3,AGBL4,AGRN,AHCY,AIFM3,AKAP9,ALDH18A1,ALDH7A1,ALKBH6,ALPK3,AMH,ANK3,ANKRD34C,ANKRD45,AP3B2,ARF3,ARHGAP26,ARHGEF3,ARHGEF33,ARIH2OS,ARL5A,ARVCF,ASB3/GPR75-ASB3,ASB8,ASH1L,ASPN,ASTN2,ATN1,ATP5IF1,B3GNT4,BAG5,BAZ2B,BBX,BCL11A,BCL7A,BEND4,BHLHE40,BIRC6,BMS1,BNC1,BPIFB…	748
Diseases and Disorders	Cancer,Gastrointestinal Disease,Organismal Injury and Abnormalities	digestive system cancer	Digestive system cancer	5.21e-36	2.26e-33	AADAC,ABCA2,ABCA7,ABCB9,ABCC1,ABCC6,ABCF2,ABCG8,ABHD16A,ABI2,ACAA1,ACO2,ACTR3,ACTR8,ADAM23,ADAMTS6,ADAT1,ADCY2,ADM,ADRM1,ADSL,AEBP1,AFF3,AGBL4,AGRN,AHCY,AIFM3,AKAP9,ALDH18A1,ALDH7A1,ALKBH6,ALPK3,AMH,ANK3,ANKRD34C,ANKRD45,AP3B2,ARF3,ARHGAP26,ARHGEF3,ARHGEF33,ARL5A,ARVCF,ASB3/GPR75-ASB3,ASB8,ASH1L,ASPN,ASTN2,ATN1,ATP5IF1,B3GNT4,BAG5,BAZ2B,BBX,BCL11A,BCL7A,BEND4,BHLHE40,BIRC6,BMS1,BNC1,BPIFB3,BRPF3,…	740
Diseases and Disorders	Cancer,Gastrointestinal Disease,Organismal Injury and Abnormalities	intestinal cancer	Intestinal cancer	1.12e-34	4.75e-32	ABCA2,ABCA7,ABCB9,ABCC1,ABCC6,ABCF2,ABHD16A,ABI2,ACAA1,ACO2,ACTR8,ADAM23,ADAMTS6,ADCY2,ADM,ADRM1,ADSL,AEBP1,AFF3,AGBL4,AGRN,AHCY,AKAP9,ALDH18A1,ALKBH6,ALPK3,AMH,ANK3,ANKRD34C,ANKRD45,AP3B2,ARF3,ARHGAP26,ARHGEF3,ARHGEF33,ARL5A,ARVCF,ASB3/GPR75-ASB3,ASB8,ASH1L,ASPN,ASTN2,ATN1,ATP5IF1,B3GNT4,BAG5,BAZ2B,BBX,BCL11A,BCL7A,BEND4,BHLHE40,BIRC6,BMS1,BNC1,BPIFB3,BRPF3,BST1,C1QL4,CAB39,CABLES2,CACNA1D,CACNA…	671
Diseases and Disorders	Cancer,Gastrointestinal Disease,Organismal Injury and Abnormalities	intestinal tumor	Intestinal tumor	1.2e-34	4.93e-32	ABCA2,ABCA7,ABCB9,ABCC1,ABCC6,ABCF2,ABHD16A,ABI2,ACAA1,ACO2,ACTR8,ADAM23,ADAMTS6,ADCY2,ADM,ADRM1,ADSL,AEBP1,AFF3,AGBL4,AGRN,AHCY,AKAP9,ALDH18A1,ALKBH6,ALPK3,AMH,ANK3,ANKRD34C,ANKRD45,AP3B2,ARF3,ARHGAP26,ARHGEF3,ARHGEF33,ARL5A,ARVCF,ASB3/GPR75-ASB3,ASB8,ASH1L,ASPN,ASTN2,ATN1,ATP5IF1,B3GNT4,BAG5,BAZ2B,BBX,BCL11A,BCL7A,BEND4,BHLHE40,BIRC6,BMS1,BNC1,BPIFB3,BRPF3,BST1,C1QL4,CAB39,CABLES2,CACNA1D,CACNA…	673
Diseases and Disorders	Cancer,Gastrointestinal Disease,Organismal Injury and Abnormalities	large intestine neoplasm	Large intestine neoplasm	3.59e-34	1.44e-31	ABCA2,ABCA7,ABCB9,ABCC1,ABCC6,ABCF2,ABHD16A,ABI2,ACAA1,ACO2,ACTR8,ADAM23,ADAMTS6,ADCY2,ADM,ADRM1,ADSL,AEBP1,AFF3,AGBL4,AGRN,AHCY,AKAP9,ALDH18A1,ALKBH6,ALPK3,AMH,ANK3,ANKRD34C,ANKRD45,AP3B2,ARF3,ARHGAP26,ARHGEF3,ARHGEF33,ARL5A,ARVCF,ASB3/GPR75-ASB3,ASB8,ASH1L,ASPN,ASTN2,ATN1,ATP5IF1,B3GNT4,BAG5,BAZ2B,BBX,BCL11A,BEND4,BHLHE40,BIRC6,BMS1,BNC1,BPIFB3,BRPF3,BST1,C1QL4,CAB39,CABLES2,CACNA1D,CACNA1I,CAC…	671
Diseases and Disorders	Cancer,Gastrointestinal Disease,Organismal Injury and Abnormalities	malignant neoplasm of large intestine	Malignant neoplasm of large intestine	4.93e-34	1.93e-31	ABCA2,ABCA7,ABCB9,ABCC1,ABCC6,ABCF2,ABHD16A,ABI2,ACAA1,ACO2,ACTR8,ADAM23,ADAMTS6,ADCY2,ADM,ADRM1,ADSL,AEBP1,AFF3,AGBL4,AGRN,AHCY,AKAP9,ALDH18A1,ALKBH6,ALPK3,AMH,ANK3,ANKRD34C,ANKRD45,AP3B2,ARF3,ARHGAP26,ARHGEF3,ARHGEF33,ARL5A,ARVCF,ASB3/GPR75-ASB3,ASB8,ASH1L,ASPN,ASTN2,ATN1,ATP5IF1,B3GNT4,BAG5,BAZ2B,BBX,BCL11A,BEND4,BHLHE40,BIRC6,BMS1,BNC1,BPIFB3,BRPF3,BST1,C1QL4,CAB39,CABLES2,CACNA1D,CACNA1I,CAC…	669
Diseases and Disorders	Cancer,Organismal Injury and Abnormalities	development	Development of malignant tumor	1.79e-33	6.83e-31	AADAC,ABCA2,ABCA7,ABCB9,ABCC1,ABCC6,ABCF2,ABI2,ACAA1,ACO2,ACTR8,ADAM23,ADCY2,ADM,ADSL,AEBP1,AFF3,AGBL4,AGRN,AHCY,AKAP9,ALDH18A1,ALDH7A1,ALPK3,AMH,ANK3,ANKRD34C,AP3B2,ARHGAP26,ARHGEF3,ARHGEF33,ARL8B,ARVCF,ASB3/GPR75-ASB3,ASH1L,ASPN,ASTN2,ATN1,ATP5IF1,B3GNT4,BAG5,BAZ2B,BCL11A,BEND4,BHLHE40,BIRC6,BMS1,BNC1,BPIFB3,BRPF3,BST1,C10orf67,C1QL4,C2orf49,CAB39,CACNA1D,CACNA1I,CACNA1S,CACNA2D3,CADM2,CADPS2,C…	651
Diseases and Disorders	Cancer,Organismal Injury and Abnormalities	development	Development of carcinoma	2.13e-33	7.93e-31	AADAC,ABCA2,ABCA7,ABCB9,ABCC1,ABCC6,ABCF2,ABI2,ACAA1,ACO2,ACTR8,ADAM23,ADCY2,ADM,ADSL,AEBP1,AFF3,AGBL4,AGRN,AHCY,AKAP9,ALDH18A1,ALDH7A1,ALPK3,AMH,ANK3,ANKRD34C,AP3B2,ARHGAP26,ARHGEF3,ARHGEF33,ARL8B,ARVCF,ASB3/GPR75-ASB3,ASH1L,ASPN,ASTN2,ATN1,ATP5IF1,B3GNT4,BAG5,BAZ2B,BCL11A,BEND4,BHLHE40,BIRC6,BMS1,BNC1,BPIFB3,BRPF3,BST1,C10orf67,C1QL4,C2orf49,CAB39,CACNA1D,CACNA1I,CACNA1S,CACNA2D3,CADM2,CADPS2,C…	647
Diseases and Disorders	Cancer,Gastrointestinal Disease,Organismal Injury and Abnormalities	development	Development of digestive organ tumor	5.62e-33	2.05e-30	AADAC,ABCA2,ABCA7,ABCB9,ABCC1,ABCF2,ABI2,ACAA1,ACO2,ACTR8,ADAM23,ADCY2,ADM,AEBP1,AFF3,AGBL4,AGRN,AKAP9,ALDH18A1,ALPK3,AMH,ANK3,ANKRD34C,ARHGAP26,ARHGEF3,ARHGEF33,ARVCF,ASB3/GPR75-ASB3,ASH1L,ASPN,ASTN2,ATN1,ATP5IF1,BAG5,BAZ2B,BCL11A,BEND4,BHLHE40,BIRC6,BMS1,BNC1,BPIFB3,BST1,C10orf67,C1QL4,CAB39,CACNA1D,CACNA1I,CACNA1S,CACNA2D3,CADM2,CADPS2,CALN1,CAMK1D,CAMKMT,CAPN6,CARF,CASP8,CCDC66,CCDC71,CCDC85A…	530
Diseases and Disorders	Cancer,Organismal Injury and Abnormalities	frequency	Frequency of tumor	8.69e-33	3.1e-30	AADAC,ABCA2,ABCA7,ABCB9,ABCC1,ABCC6,ABCF2,ABI2,ACAA1,ACO2,ACTR8,ADAM23,ADCY2,ADM,ADSL,AEBP1,AFF3,AGBL4,AGRN,AHCY,AKAP9,ALDH18A1,ALDH7A1,ALPK3,AMH,ANK3,ANKRD34C,AP3B2,ARHGAP26,ARHGEF3,ARHGEF33,ARL8B,ARVCF,ASB3/GPR75-ASB3,ASH1L,ASPN,ASTN2,ATN1,ATP5IF1,B3GNT4,BAG5,BAZ2B,BCL11A,BEND4,BHLHE40,BIRC6,BMS1,BNC1,BPIFB3,BRPF3,BST1,C10orf67,C1QL4,C2orf49,CAB39,CACNA1D,CACNA1I,CACNA1S,CACNA2D3,CADM2,CADPS2,C…	654
Diseases and Disorders	Cancer,Organismal Injury and Abnormalities	tumorigenesis	Tumorigenesis of epithelial neoplasm	1.5e-32	5.24e-30	AADAC,ABCA2,ABCA7,ABCB9,ABCC1,ABCC6,ABCF2,ABI2,ACAA1,ACO2,ACTR8,ADAM23,ADCY2,ADM,ADSL,AEBP1,AFF3,AGBL4,AGRN,AHCY,AKAP9,ALDH18A1,ALDH7A1,ALPK3,AMH,ANK3,ANKRD34C,AP3B2,ARHGAP26,ARHGEF3,ARHGEF33,ARL8B,ARVCF,ASB3/GPR75-ASB3,ASH1L,ASPN,ASTN2,ATN1,ATP5IF1,B3GNT4,BAG5,BAZ2B,BCL11A,BEND4,BHLHE40,BIRC6,BMS1,BNC1,BPIFB3,BRPF3,BST1,C10orf67,C1QL4,C2orf49,CAB39,CACNA1D,CACNA1I,CACNA1S,CACNA2D3,CADM2,CADPS2,C…	649
Diseases and Disorders	Cancer,Organismal Injury and Abnormalities	malignant genitourinary solid tumor	Malignant genitourinary solid tumor	1.46e-31	4.98e-29	AADAC,ABCA2,ABCB9,ABCC1,ABCC6,ABCF2,ABI2,ACAA1,ACTR3,ADAM23,ADAMTS6,ADAT1,ADCY2,ADM,ADRM1,ADSL,AEBP1,AFF3,AGBL4,AGRN,AHCY,AKAP9,ALDH18A1,ALDH7A1,ALKBH6,ALPK3,ANK3,ANKRD34C,AP3B2,ARF3,ARHGAP26,ARHGEF3,ARHGEF33,ARL8B,ARVCF,ASB3/GPR75-ASB3,ASH1L,ASPN,ASTN2,ATN1,ATP5IF1,B3GNT4,BAZ2B,BCL11A,BHLHE40,BIRC6,BMS1,BNC1,BPIFB3,BRPF3,BST1,C10orf67,C22orf39,CAB39,CACNA1D,CACNA1I,CACNA1S,CACNA2D3,CADM2,CADPS2,…	637
Diseases and Disorders	Cancer,Organismal Injury and Abnormalities	incidence	Incidence of tumor	3.65e-31	1.22e-28	AADAC,ABCA2,ABCA7,ABCB9,ABCC1,ABCC6,ABCF2,ABI2,ACAA1,ACO2,ACTR3,ACTR8,ADAM23,ADCY2,ADM,ADSL,AEBP1,AFF3,AGBL4,AGRN,AHCY,AKAP9,ALDH18A1,ALDH7A1,ALKBH6,ALPK3,AMH,ANK3,ANKRD34C,AP3B2,ARHGAP26,ARHGEF3,ARHGEF33,ARL8B,ARVCF,ASB3/GPR75-ASB3,ASH1L,ASPN,ASTN2,ATN1,ATP5IF1,B3GNT4,BAG5,BAZ2B,BCL11A,BEND4,BHLHE40,BIRC6,BMS1,BNC1,BPIFB3,BRPF3,BST1,C10orf67,C1QL4,C2orf49,CAB39,CACNA1D,CACNA1I,CACNA1S,CACNA2D3,C…	663
Diseases and Disorders	Cancer,Organismal Injury and Abnormalities	genitourinary carcinoma	Genitourinary carcinoma	5.17e-31	1.69e-28	AADAC,ABCA2,ABCB9,ABCC1,ABCC6,ABCF2,ABI2,ADAM23,ADAMTS6,ADAT1,ADCY2,ADM,ADSL,AEBP1,AFF3,AGBL4,AGRN,AHCY,AKAP9,ALDH18A1,ALDH7A1,ALKBH6,ALPK3,ANK3,ANKRD34C,AP3B2,ARF3,ARHGAP26,ARHGEF3,ARHGEF33,ARL8B,ARVCF,ASB3/GPR75-ASB3,ASH1L,ASPN,ASTN2,ATN1,ATP5IF1,B3GNT4,BAZ2B,BCL11A,BHLHE40,BIRC6,BMS1,BNC1,BPIFB3,BRPF3,BST1,C10orf67,C22orf39,CAB39,CACNA1D,CACNA1I,CACNA1S,CACNA2D3,CADM2,CADPS2,CALN1,CAMKMT,CAPN6…	609
Diseases and Disorders	Cancer,Neurological Disease,Organismal Injury and Abnormalities	nervous system cancer	Nervous system cancer	1.12e-30	3.61e-28	AADAC,ABCA2,ABCA7,ABCC1,ABCC6,ABCF2,ABCG8,ACAA1,ACTR8,ADAM23,ADAMTS6,ADCY2,ADM,ADSL,AFF3,AGRN,AHCY,AIFM3,AKAP9,ALDH18A1,ALPK3,AMH,ANK3,ANKRD34C,ANKRD45,AP3B2,ARF3,ARHGEF33,ARL8B,ARVCF,ASB3/GPR75-ASB3,ASH1L,ASTN2,ATN1,B3GNT4,BAG5,BAZ2B,BBX,BCL11A,BCL7A,BHLHE40,BIRC6,BMS1,BNC1,BPIFB3,BRPF3,BST1,C10orf67,C1QL4,CACNA1D,CACNA1I,CACNA1S,CACNA2D3,CADPS2,CALN1,CAMK1D,CASP8,CBR4,CCDC66,CCDC71,CCDC85A,CCDC…	537
Diseases and Disorders	Cancer,Organismal Injury and Abnormalities	genitourinary adenocarcinoma	Genitourinary adenocarcinoma	1.59e-30	4.91e-28	ABCA2,ABCB9,ABCC1,ABCC6,ABCF2,ABI2,ADAM23,ADAMTS6,ADAT1,ADCY2,ADM,ADSL,AEBP1,AFF3,AGBL4,AHCY,AKAP9,ALDH18A1,ALDH7A1,ALPK3,ANK3,ANKRD34C,AP3B2,ARF3,ARHGAP26,ARHGEF3,ARHGEF33,ARL8B,ARVCF,ASB3/GPR75-ASB3,ASH1L,ASPN,ASTN2,ATP5IF1,B3GNT4,BAZ2B,BCL11A,BHLHE40,BIRC6,BMS1,BNC1,BRPF3,BST1,C10orf67,C22orf39,CAB39,CACNA1D,CACNA1S,CACNA2D3,CADM2,CADPS2,CALN1,CAPN6,CARF,CASP8,CBR4,CCDC66,CCDC85A,CD276,CD47,CD…	553
Diseases and Disorders	Cancer,Organismal Injury and Abnormalities	genitourinary tumor	Genitourinary tumor	1.59e-30	4.91e-28	AADAC,ABCA2,ABCB9,ABCC1,ABCC6,ABCF2,ABI2,ACAA1,ACTR3,ADAM23,ADAMTS6,ADAT1,ADCY2,ADM,ADRM1,ADSL,AEBP1,AFF3,AGBL4,AGRN,AHCY,AKAP9,ALDH18A1,ALDH7A1,ALKBH6,ALPK3,AMH,ANK3,ANKRD34C,AP3B2,ARF3,ARHGAP26,ARHGEF3,ARHGEF33,ARL8B,ARVCF,ASB3/GPR75-ASB3,ASH1L,ASPN,ASTN2,ATN1,ATP5IF1,B3GNT4,BAZ2B,BCL11A,BHLHE40,BIRC6,BMS1,BNC1,BPIFB3,BRPF3,BST1,C10orf67,C22orf39,CAB39,CACNA1D,CACNA1I,CACNA1S,CACNA2D3,CADM2,CAD…	641
Diseases and Disorders	Cancer,Neurological Disease,Organismal Injury and Abnormalities	central nervous system cancer	Central nervous system cancer	2.47e-30	7.47e-28	AADAC,ABCA2,ABCA7,ABCC1,ABCC6,ABCF2,ABCG8,ACAA1,ACTR8,ADAM23,ADAMTS6,ADCY2,ADM,ADSL,AFF3,AGRN,AHCY,AIFM3,AKAP9,ALDH18A1,ALPK3,AMH,ANK3,ANKRD34C,ANKRD45,AP3B2,ARF3,ARHGEF33,ARL8B,ARVCF,ASB3/GPR75-ASB3,ASH1L,ASTN2,ATN1,B3GNT4,BAG5,BAZ2B,BBX,BCL11A,BCL7A,BHLHE40,BIRC6,BMS1,BNC1,BPIFB3,BRPF3,BST1,C10orf67,C1QL4,CACNA1D,CACNA1I,CACNA1S,CACNA2D3,CADPS2,CALN1,CAMK1D,CASP8,CBR4,CCDC66,CCDC71,CCDC85A,CCDC…	536
Diseases and Disorders	Cancer,Neurological Disease,Organismal Injury and Abnormalities	brain glioma formation	Brain glioma	3.62e-30	1.08e-27	AADAC,ABCA2,ABCA7,ABCB9,ABCC1,ABCC6,ABCF2,ABCG8,ABI2,ACAA1,ACTR8,ADAM23,ADAMTS6,ADCY2,ADM,ADSL,AFF3,AGRN,AHCY,AIFM3,AKAP9,ALDH18A1,ALPK3,AMH,ANK3,ANKRD34C,ANKRD45,AP3B2,ARF3,ARHGEF33,ARL8B,ARVCF,ASB3/GPR75-ASB3,ASH1L,ASTN2,ATN1,B3GNT4,BAG5,BAZ2B,BBX,BCL11A,BCL7A,BHLHE40,BIRC6,BMS1,BNC1,BRPF3,BST1,C10orf67,C1QL4,CACNA1D,CACNA1I,CACNA1S,CACNA2D3,CADPS2,CALN1,CAMK1D,CASP8,CBR4,CCDC66,CCDC71,CCDC85A,…	523
Diseases and Disorders	Cancer,Neurological Disease,Organismal Injury and Abnormalities	nervous system neoplasm	Nervous system neoplasm	3.79e-30	1.11e-27	AADAC,ABCA2,ABCA7,ABCB9,ABCC1,ABCC6,ABCF2,ABCG8,ABI2,ACAA1,ACTR8,ADAM23,ADAMTS6,ADCY2,ADM,ADSL,AFF3,AGBL4,AGRN,AHCY,AIFM3,AKAP9,ALDH18A1,ALPK3,AMH,ANK3,ANKRD34C,ANKRD45,AP3B2,ARF3,ARHGEF33,ARL8B,ARVCF,ASB3/GPR75-ASB3,ASH1L,ASTN2,ATN1,B3GNT4,BAG5,BAZ2B,BBX,BCL11A,BCL7A,BHLHE40,BIRC6,BMS1,BNC1,BPIFB3,BRPF3,BST1,C10orf67,C1QL4,CACNA1D,CACNA1I,CACNA1S,CACNA2D3,CADPS2,CALN1,CAMK1D,CASP8,CBR4,CCDC66,CC…	550
Diseases and Disorders	Cancer,Organismal Injury and Abnormalities	melanoma	Melanoma	7.13e-30	2.04e-27	AADAC,ABCA2,ABCA7,ABCB9,ABCC1,ABCC6,ABCG8,ABHD16A,ABI2,ACAA1,ACO2,ACTR3,ACTR8,ADAM23,ADAMTS6,ADAT1,ADM,ADRM1,AEBP1,AFF3,AGBL4,AGRN,AHCY,AIFM3,AKAP9,ALDH18A1,ALDH7A1,ALPK3,AMH,ANK3,ANKRD34C,ANKRD45,AP3B2,ARHGAP26,ARHGEF33,ARIH2OS,ARL8B,ARVCF,ASB3/GPR75-ASB3,ASH1L,ASTN2,ATN1,B3GNT4,BAZ2B,BBX,BCL11A,BEND4,BIRC6,BNC1,BPIFB3,BRPF3,C12orf54,CABLES2,CACNA1D,CACNA1I,CACNA1S,CACNA2D3,CADM2,CADPS2,CALN1,CA…	621
Diseases and Disorders	Cancer,Neurological Disease,Organismal Injury and Abnormalities	central nervous system tumor	Central nervous system tumor	7.41e-30	2.09e-27	AADAC,ABCA2,ABCA7,ABCB9,ABCC1,ABCC6,ABCF2,ABCG8,ABI2,ACAA1,ACTR8,ADAM23,ADAMTS6,ADCY2,ADM,ADSL,AFF3,AGBL4,AGRN,AHCY,AIFM3,AKAP9,ALDH18A1,ALPK3,AMH,ANK3,ANKRD34C,ANKRD45,AP3B2,ARF3,ARHGEF33,ARL8B,ARVCF,ASB3/GPR75-ASB3,ASH1L,ASTN2,ATN1,B3GNT4,BAG5,BAZ2B,BBX,BCL11A,BCL7A,BHLHE40,BIRC6,BMS1,BNC1,BPIFB3,BRPF3,BST1,C10orf67,C1QL4,CACNA1D,CACNA1I,CACNA1S,CACNA2D3,CADPS2,CALN1,CAMK1D,CASP8,CBR4,CCDC66,CC…	546
Diseases and Disorders	Cancer,Neurological Disease,Organismal Injury and Abnormalities	glioma cancer	Glioma cancer	7.71e-30	2.13e-27	AADAC,ABCA2,ABCA7,ABCC1,ABCC6,ABCF2,ABCG8,ACAA1,ACTR8,ADAM23,ADAMTS6,ADCY2,ADM,ADSL,AFF3,AGRN,AHCY,AIFM3,AKAP9,ALDH18A1,ALPK3,AMH,ANK3,ANKRD34C,ANKRD45,AP3B2,ARF3,ARHGEF33,ARL8B,ARVCF,ASB3/GPR75-ASB3,ASH1L,ASTN2,ATN1,B3GNT4,BAG5,BAZ2B,BBX,BCL11A,BCL7A,BHLHE40,BIRC6,BMS1,BNC1,BRPF3,BST1,C10orf67,C1QL4,CACNA1D,CACNA1I,CACNA1S,CACNA2D3,CADPS2,CALN1,CAMK1D,CASP8,CBR4,CCDC66,CCDC71,CCDC85A,CCDC92,CD27…	528
Diseases and Disorders	Cancer,Neurological Disease,Organismal Injury and Abnormalities	central nervous system solid tumor	Central nervous system solid tumor	1.57e-29	4.26e-27	AADAC,ABCA2,ABCA7,ABCB9,ABCC1,ABCC6,ABCF2,ABCG8,ABI2,ACAA1,ACTR8,ADAM23,ADAMTS6,ADCY2,ADM,ADSL,AFF3,AGBL4,AGRN,AHCY,AIFM3,AKAP9,ALDH18A1,ALPK3,AMH,ANK3,ANKRD34C,ANKRD45,AP3B2,ARF3,ARHGEF33,ARL8B,ARVCF,ASB3/GPR75-ASB3,ASH1L,ASTN2,ATN1,B3GNT4,BAG5,BAZ2B,BBX,BCL11A,BCL7A,BHLHE40,BIRC6,BMS1,BNC1,BPIFB3,BRPF3,BST1,C10orf67,C1QL4,CACNA1D,CACNA1I,CACNA1S,CACNA2D3,CADPS2,CALN1,CAMK1D,CASP8,CBR4,CCDC66,CC…	545
Diseases and Disorders	Cancer,Neurological Disease,Organismal Injury and Abnormalities	glioma formation	Glioma	2.38e-29	6.37e-27	AADAC,ABCA2,ABCA7,ABCB9,ABCC1,ABCC6,ABCF2,ABCG8,ABI2,ACAA1,ACTR8,ADAM23,ADAMTS6,ADCY2,ADM,ADSL,AFF3,AGRN,AHCY,AIFM3,AKAP9,ALDH18A1,ALPK3,AMH,ANK3,ANKRD34C,ANKRD45,AP3B2,ARF3,ARHGEF33,ARL8B,ARVCF,ASB3/GPR75-ASB3,ASH1L,ASTN2,ATN1,B3GNT4,BAG5,BAZ2B,BBX,BCL11A,BCL7A,BHLHE40,BIRC6,BMS1,BNC1,BRPF3,BST1,C10orf67,C1QL4,CACNA1D,CACNA1I,CACNA1S,CACNA2D3,CADPS2,CALN1,CAMK1D,CASP8,CBR4,CCDC66,CCDC71,CCDC85A,…	534
Diseases and Disorders	Cancer,Neurological Disease,Organismal Injury and Abnormalities	brain tumor	Brain tumor	2.54e-29	6.67e-27	AADAC,ABCA2,ABCA7,ABCB9,ABCC1,ABCC6,ABCF2,ABCG8,ABI2,ACAA1,ACTR8,ADAM23,ADAMTS6,ADCY2,ADM,ADSL,AFF3,AGRN,AHCY,AIFM3,AKAP9,ALDH18A1,ALPK3,AMH,ANK3,ANKRD34C,ANKRD45,AP3B2,ARF3,ARHGEF33,ARL8B,ARVCF,ASB3/GPR75-ASB3,ASH1L,ASTN2,ATN1,B3GNT4,BAG5,BAZ2B,BBX,BCL11A,BCL7A,BHLHE40,BIRC6,BMS1,BNC1,BRPF3,BST1,C10orf67,C1QL4,CACNA1D,CACNA1I,CACNA1S,CACNA2D3,CADPS2,CALN1,CAMK1D,CASP8,CBR4,CCDC66,CCDC71,CCDC85A,…	525
Diseases and Disorders	Neurological Disease,Organismal Injury and Abnormalities	brain lesion	Brain lesion	2.8e-29	7.25e-27	AADAC,ABCA2,ABCA7,ABCB9,ABCC1,ABCC6,ABCF2,ABCG8,ABI2,ACAA1,ACTR8,ADAM23,ADAMTS6,ADCY2,ADM,ADSL,AFF3,AGRN,AHCY,AIFM3,AKAP9,ALDH18A1,ALPK3,AMH,ANK3,ANKRD34C,ANKRD45,AP3B2,ARF3,ARHGEF33,ARL8B,ARVCF,ASB3/GPR75-ASB3,ASH1L,ASTN2,ATN1,B3GNT4,BAG5,BAZ2B,BBX,BCL11A,BCL7A,BHLHE40,BIRC6,BMS1,BNC1,BRPF3,BST1,C10orf67,C1QL4,CACNA1D,CACNA1I,CACNA1S,CACNA2D3,CADPS2,CALN1,CAMK1D,CASP8,CBR4,CCDC66,CCDC71,CCDC85A,…	528
Diseases and Disorders	Cancer,Gastrointestinal Disease,Organismal Injury and Abnormalities	non-colon gastrointestinal cancer	Non-colon gastrointestinal cancer	3.34e-29	8.52e-27	AADAC,ABCA2,ABCA7,ABCB9,ABCC1,ABCF2,ABCG8,ACAA1,ADAM23,ADAMTS6,ADCY2,ADSL,AEBP1,AFF3,AGBL4,AGRN,AKAP9,ALDH18A1,ALPK3,ANK3,ANKRD34C,ARHGAP26,ARHGEF3,ARVCF,ASB3/GPR75-ASB3,ASH1L,ASPN,ASTN2,ATN1,BAG5,BAZ2B,BCL11A,BCL7A,BEND4,BIRC6,BMS1,BNC1,BPIFB3,BRPF3,BST1,C10orf67,CABLES2,CACNA1D,CACNA1I,CACNA1S,CACNA2D3,CADPS2,CALN1,CAPN6,CARF,CASP8,CCDC134,CCDC66,CCDC85A,CCDC92,CD276,CD47,CDC45,CDH23,CDHR1,CDK2…	443
Diseases and Disorders	Cancer,Gastrointestinal Disease,Organismal Injury and Abnormalities	upper gastrointestinal tract tumor	Upper gastrointestinal tract tumor	3.52e-29	8.82e-27	AADAC,ABCA2,ABCA7,ABCB9,ABCC1,ABCF2,ABCG8,ACAA1,ADAM23,ADAMTS6,ADCY2,ADSL,AEBP1,AFF3,AGBL4,AGRN,AKAP9,ALDH18A1,ALPK3,ANK3,ANKRD34C,ARHGAP26,ARHGEF3,ARVCF,ASB3/GPR75-ASB3,ASH1L,ASPN,ASTN2,ATN1,BAG5,BAZ2B,BCL11A,BCL7A,BEND4,BIRC6,BMS1,BNC1,BPIFB3,BRPF3,BST1,C10orf67,CABLES2,CACNA1D,CACNA1I,CACNA1S,CACNA2D3,CADPS2,CALN1,CAPN6,CARF,CASP8,CCDC134,CCDC85A,CCDC92,CD276,CD47,CDC45,CDHR1,CDK2AP1,CDKN1A,CD…	427
Diseases and Disorders	Cancer,Gastrointestinal Disease,Organismal Injury and Abnormalities	upper gastrointestinal carcinoma	Upper gastrointestinal carcinoma	3.95e-29	9.75e-27	AADAC,ABCA2,ABCA7,ABCB9,ABCC1,ABCF2,ABCG8,ACAA1,ADAM23,ADAMTS6,ADCY2,ADSL,AEBP1,AFF3,AGBL4,AGRN,AKAP9,ALDH18A1,ALPK3,ANK3,ANKRD34C,ARHGAP26,ARHGEF3,ARVCF,ASB3/GPR75-ASB3,ASH1L,ASPN,ASTN2,ATN1,BAG5,BAZ2B,BCL11A,BEND4,BIRC6,BMS1,BNC1,BPIFB3,BRPF3,BST1,C10orf67,CABLES2,CACNA1D,CACNA1I,CACNA1S,CACNA2D3,CADPS2,CALN1,CAPN6,CARF,CASP8,CCDC134,CCDC85A,CCDC92,CD276,CD47,CDC45,CDHR1,CDK2AP1,CDX2,CELSR3,CEN…	417
Diseases and Disorders	Cancer,Gastrointestinal Disease,Organismal Injury and Abnormalities	colon adenocarcinoma	Colon adenocarcinoma	7.71e-29	1.88e-26	ABCA2,ABCB9,ABCC1,ABCF2,ABI2,ACO2,ACTR8,ADAM23,ADCY2,ADM,AEBP1,AFF3,AGRN,AKAP9,ALPK3,AMH,ANK3,ARHGEF3,ARHGEF33,ARVCF,ASH1L,ASTN2,BAZ2B,BCL11A,BEND4,BHLHE40,BIRC6,BMS1,BST1,C1QL4,CAB39,CACNA1D,CADM2,CADPS2,CALN1,CAMK1D,CAMKMT,CAPN6,CARF,CASP8,CCDC66,CCDC71,CCDC85A,CDC45,CDH23,CDH7,CDHR1,CDK2AP1,CDX2,CELSR3,CENPJ,CENPT,CEP85L,CEPT1,CERS5,CHST5,CLCA1,CLCA4,CNTNAP4,CNTNAP5,COL4A2,COL5A1,COL6A3,COL6A6…	411
Diseases and Disorders	Cancer,Gastrointestinal Disease,Organismal Injury and Abnormalities	upper gastrointestinal tract cancer	Upper gastrointestinal tract cancer	8.14e-29	1.95e-26	AADAC,ABCA2,ABCA7,ABCB9,ABCC1,ABCF2,ABCG8,ACAA1,ADAM23,ADAMTS6,ADCY2,ADSL,AEBP1,AFF3,AGBL4,AGRN,AKAP9,ALDH18A1,ALPK3,ANK3,ANKRD34C,ARHGAP26,ARHGEF3,ARVCF,ASB3/GPR75-ASB3,ASH1L,ASPN,ASTN2,ATN1,BAG5,BAZ2B,BCL11A,BCL7A,BEND4,BIRC6,BMS1,BNC1,BPIFB3,BRPF3,BST1,C10orf67,CABLES2,CACNA1D,CACNA1I,CACNA1S,CACNA2D3,CADPS2,CALN1,CAPN6,CARF,CASP8,CCDC134,CCDC85A,CCDC92,CD276,CD47,CDC45,CDHR1,CDK2AP1,CDKN1A,CD…	425
Diseases and Disorders	Cancer,Gastrointestinal Disease,Hepatic System Disease,Organismal Injury and Abnormalities	liver carcinoma	Liver carcinoma	9.34e-29	2.2e-26	AADAC,ABCA2,ABCA7,ABCC1,ABCC6,ABCG8,ABHD16A,ACAA1,ACO2,ACTR3,ADAM23,ADAMTS6,ADAT1,ADCY2,ADRM1,AEBP1,AFF3,AGBL4,AGRN,AIFM3,AKAP9,ALDH7A1,AMH,ANK3,ANKRD34C,ARHGEF3,ARVCF,ASB3/GPR75-ASB3,ASH1L,ASPN,ASTN2,ATN1,BAG5,BAZ2B,BCL11A,BEND4,BHLHE40,BIRC6,BMS1,BNC1,C1QL4,C20orf204,C2orf49,CABLES2,CACNA1D,CACNA1I,CACNA1S,CACNA2D3,CADM2,CADPS2,CALN1,CAMK1D,CARF,CASP8,CCDC92,CD276,CD47,CDC45,CDH23,CDH7,CDHR1,CD…	398
Diseases and Disorders	Cancer,Gastrointestinal Disease,Organismal Injury and Abnormalities	colon cancer	Colon cancer	1.01e-28	2.35e-26	ABCA2,ABCB9,ABCC1,ABCF2,ABI2,ACO2,ACTR8,ADAM23,ADCY2,ADM,ADSL,AEBP1,AFF3,AGRN,AHCY,AKAP9,ALPK3,AMH,ANK3,ARHGEF3,ARHGEF33,ARVCF,ASH1L,ASTN2,ATP5IF1,BAZ2B,BCL11A,BEND4,BHLHE40,BIRC6,BMS1,BST1,C1QL4,CAB39,CACNA1D,CADM2,CADPS2,CALN1,CAMK1D,CAMKMT,CAPN6,CARF,CASP8,CCDC66,CCDC71,CCDC85A,CDC45,CDH23,CDH7,CDHR1,CDK2AP1,CDKN1A,CDX2,CELSR3,CENPJ,CENPT,CEP85L,CEPT1,CERS5,CHMP1A,CHST5,CLCA1,CLCA4,CNTNAP2,CNT…	427
Diseases and Disorders	Gastrointestinal Disease,Hepatic System Disease,Organismal Injury and Abnormalities	liver lesion	Liver lesion	1.23e-28	2.82e-26	AADAC,ABCA2,ABCA7,ABCC1,ABCC6,ABCG8,ABHD16A,ABI2,ACAA1,ACO2,ACTR3,ADAM23,ADAMTS6,ADAT1,ADCY2,ADM,ADRM1,AEBP1,AFF3,AGBL4,AGRN,AIFM3,AKAP9,ALDH7A1,AMH,ANK3,ANKRD34C,ARHGEF3,ARIH2OS,ARVCF,ASB3/GPR75-ASB3,ASH1L,ASPN,ASTN2,ATN1,BAG5,BAZ2B,BBX,BCL11A,BEND4,BHLHE40,BIRC6,BMS1,BNC1,C1QL4,C20orf204,C2orf49,CABLES2,CACNA1D,CACNA1I,CACNA1S,CACNA2D3,CADM2,CADPS2,CALN1,CAMK1D,CARF,CASP8,CCDC71,CCDC92,CD276,CD…	465
Diseases and Disorders	Cancer,Gastrointestinal Disease,Hepatic System Disease,Organismal Injury and Abnormalities	liver tumor	Liver tumor	2.01e-28	4.55e-26	AADAC,ABCA2,ABCA7,ABCC1,ABCC6,ABCG8,ABHD16A,ABI2,ACAA1,ACO2,ACTR3,ADAM23,ADAMTS6,ADAT1,ADCY2,ADRM1,AEBP1,AFF3,AGBL4,AGRN,AIFM3,AKAP9,ALDH7A1,AMH,ANK3,ANKRD34C,ARHGEF3,ARIH2OS,ARVCF,ASB3/GPR75-ASB3,ASH1L,ASPN,ASTN2,ATN1,BAG5,BAZ2B,BBX,BCL11A,BEND4,BHLHE40,BIRC6,BMS1,BNC1,C1QL4,C20orf204,C2orf49,CABLES2,CACNA1D,CACNA1I,CACNA1S,CACNA2D3,CADM2,CADPS2,CALN1,CAMK1D,CARF,CASP8,CCDC71,CCDC92,CD276,CD47,C…	450
Diseases and Disorders	Cancer,Organismal Injury and Abnormalities	anogenital cancer	Anogenital cancer	2.55e-28	5.69e-26	AADAC,ABCA2,ABCB9,ABCC1,ABCC6,ABCF2,ABI2,ACAA1,ACTR3,ADAM23,ADAMTS6,ADAT1,ADCY2,ADM,ADRM1,ADSL,AEBP1,AFF3,AGBL4,AGRN,AHCY,AKAP9,ALDH18A1,ALDH7A1,ALKBH6,ALPK3,ANK3,ANKRD34C,AP3B2,ARF3,ARHGAP26,ARHGEF3,ARHGEF33,ARL8B,ARVCF,ASB3/GPR75-ASB3,ASH1L,ASPN,ASTN2,ATN1,ATP5IF1,B3GNT4,BAZ2B,BCL11A,BHLHE40,BIRC6,BMS1,BNC1,BPIFB3,BRPF3,BST1,C10orf67,C22orf39,CAB39,CACNA1D,CACNA1I,CACNA1S,CACNA2D3,CADPS2,CALN1,…	598
Diseases and Disorders	Cancer,Gastrointestinal Disease,Organismal Injury and Abnormalities	colorectal adenocarcinoma	Colorectal adenocarcinoma	2.84e-28	6.24e-26	ABCA2,ABCB9,ABCC1,ABCF2,ABI2,ACO2,ACTR8,ADAM23,ADCY2,ADM,AEBP1,AFF3,AGRN,AKAP9,ALPK3,AMH,ANK3,ARHGEF3,ARHGEF33,ARVCF,ASH1L,ASTN2,BAZ2B,BCL11A,BEND4,BHLHE40,BIRC6,BMS1,BST1,C1QL4,CAB39,CACNA1D,CADM2,CADPS2,CALN1,CAMK1D,CAMKMT,CAPN6,CARF,CASP8,CCDC66,CCDC71,CCDC85A,CDC45,CDH23,CDH7,CDHR1,CDK2AP1,CDX2,CELSR3,CENPJ,CENPT,CEP85L,CEPT1,CERS5,CHST5,CLCA1,CLCA4,CNTNAP4,CNTNAP5,COL4A2,COL5A1,COL6A3,COL6A6…	424
Diseases and Disorders	Cancer,Gastrointestinal Disease,Organismal Injury and Abnormalities	colon carcinoma	Colon carcinoma	3e-28	6.52e-26	ABCA2,ABCB9,ABCC1,ABCF2,ABI2,ACO2,ACTR8,ADAM23,ADCY2,ADM,AEBP1,AFF3,AGRN,AKAP9,ALPK3,AMH,ANK3,ARHGEF3,ARHGEF33,ARVCF,ASH1L,ASTN2,ATP5IF1,BAZ2B,BCL11A,BEND4,BHLHE40,BIRC6,BMS1,BST1,C1QL4,CAB39,CACNA1D,CADM2,CADPS2,CALN1,CAMK1D,CAMKMT,CAPN6,CARF,CASP8,CCDC66,CCDC71,CCDC85A,CDC45,CDH23,CDH7,CDHR1,CDK2AP1,CDX2,CELSR3,CENPJ,CENPT,CEP85L,CEPT1,CERS5,CHST5,CLCA1,CLCA4,CNTNAP4,CNTNAP5,COL4A2,COL5A1,COL6A…	414
Diseases and Disorders	Cancer,Gastrointestinal Disease,Organismal Injury and Abnormalities	colon tumor	Colon tumor	3.33e-28	7.13e-26	ABCA2,ABCB9,ABCC1,ABCF2,ABI2,ACO2,ACTR8,ADAM23,ADCY2,ADM,ADSL,AEBP1,AFF3,AGRN,AHCY,AKAP9,ALPK3,AMH,ANK3,ARHGEF3,ARHGEF33,ARVCF,ASH1L,ASTN2,ATP5IF1,BAZ2B,BCL11A,BEND4,BHLHE40,BIRC6,BMS1,BST1,C1QL4,CAB39,CACNA1D,CADM2,CADPS2,CALN1,CAMK1D,CAMKMT,CAPN6,CARF,CASP8,CCDC66,CCDC71,CCDC85A,CD276,CDC45,CDH23,CDH7,CDHR1,CDK2AP1,CDKN1A,CDX2,CELSR3,CENPJ,CENPT,CEP85L,CEPT1,CERS5,CHMP1A,CHST5,CLCA1,CLCA4,CNTNA…	429
Diseases and Disorders	Cancer,Gastrointestinal Disease,Organismal Injury and Abnormalities	development	Development of colorectal tumor	2.67e-27	5.64e-25	ABCA2,ABCB9,ABCC1,ABCF2,ABI2,ACO2,ACTR8,ADAM23,ADCY2,ADM,AEBP1,AFF3,AGRN,AKAP9,ALPK3,AMH,ANK3,ARHGEF3,ARHGEF33,ARVCF,ASH1L,ASTN2,ATP5IF1,BAZ2B,BCL11A,BEND4,BHLHE40,BIRC6,BMS1,BST1,C1QL4,CAB39,CACNA1D,CADM2,CADPS2,CALN1,CAMK1D,CAMKMT,CAPN6,CARF,CASP8,CCDC66,CCDC71,CCDC85A,CDC45,CDH23,CDH7,CDHR1,CDK2AP1,CDX2,CELSR3,CENPJ,CENPT,CEP85L,CEPT1,CERS5,CHST5,CLCA1,CLCA4,CLCN2,CNTNAP4,CNTNAP5,COL4A2,COL5A1…	429
Diseases and Disorders	Cancer,Gastrointestinal Disease,Organismal Injury and Abnormalities	tumorigenesis	Tumorigenesis of gastrointestinal tumor	3.12e-27	6.51e-25	ABCA2,ABCB9,ABCC1,ABCF2,ABI2,ACO2,ACTR8,ADAM23,ADCY2,ADM,AEBP1,AFF3,AGRN,AKAP9,ALPK3,AMH,ANK3,ARHGEF3,ARHGEF33,ARVCF,ASH1L,ASTN2,ATP5IF1,BAZ2B,BCL11A,BEND4,BHLHE40,BIRC6,BMS1,BST1,C1QL4,CAB39,CACNA1D,CADM2,CADPS2,CALN1,CAMK1D,CAMKMT,CAPN6,CARF,CASP8,CCDC66,CCDC71,CCDC85A,CDC45,CDH23,CDH7,CDHR1,CDK2AP1,CDX2,CELSR3,CENPJ,CENPT,CEP85L,CEPT1,CERS5,CHST5,CLCA1,CLCA4,CLCN2,CNTNAP4,CNTNAP5,COL4A2,COL5A1…	430
Diseases and Disorders	Cancer,Gastrointestinal Disease,Organismal Injury and Abnormalities	colorectal carcinomagenesis	Colorectal carcinoma	4.26e-27	8.76e-25	ABCA2,ABCB9,ABCC1,ABCF2,ABI2,ACO2,ACTR8,ADAM23,ADCY2,ADM,AEBP1,AFF3,AGRN,AKAP9,ALPK3,AMH,ANK3,ARHGEF3,ARHGEF33,ARVCF,ASH1L,ASTN2,ATP5IF1,BAZ2B,BCL11A,BEND4,BHLHE40,BIRC6,BMS1,BST1,C1QL4,CAB39,CACNA1D,CADM2,CADPS2,CALN1,CAMK1D,CAMKMT,CAPN6,CARF,CASP8,CCDC66,CCDC71,CCDC85A,CDC45,CDH23,CDH7,CDHR1,CDK2AP1,CDX2,CELSR3,CENPJ,CENPT,CEP85L,CEPT1,CERS5,CHST5,CLCA1,CLCA4,CLCN2,CNTNAP4,CNTNAP5,COL4A2,COL5A1…	428
Diseases and Disorders	Dermatological Diseases and Conditions,Organismal Injury and Abnormalities	skin lesion	Skin lesion	5.16e-27	1.05e-24	AADAC,ABCA2,ABCA7,ABCB9,ABCC1,ABCC6,ABCG8,ABHD16A,ABI2,ACAA1,ACO2,ACTR3,ACTR8,ADAM23,ADAMTS6,ADAT1,ADRM1,AEBP1,AFF3,AGBL4,AGRN,AHCY,AIFM3,AKAP9,ALDH18A1,ALDH7A1,ALPK3,AMH,ANK3,ANKRD34C,ANKRD45,AP3B2,ARHGAP26,ARHGEF3,ARHGEF33,ARIH2OS,ARL8B,ARVCF,ASB3/GPR75-ASB3,ASH1L,ASTN2,ATN1,B3GNT4,BAG5,BAZ2B,BBX,BCL11A,BEND4,BIRC6,BMS1,BNC1,BPIFB3,BRPF3,C12orf54,CABLES2,CACNA1D,CACNA1I,CACNA1S,CACNA2D3,CADM2,C…	608
Diseases and Disorders	Cancer,Organismal Injury and Abnormalities	breast or colorectal cancer	Breast or colorectal cancer	5.63e-27	1.12e-24	ABCA2,ABCB9,ABCC1,ABCF2,ABI2,ACAA1,ACO2,ACTR8,ADAM23,ADAMTS6,ADCY2,ADM,ADRM1,ADSL,AEBP1,AFF3,AGRN,AHCY,AKAP9,ALDH18A1,ALKBH6,ALPK3,AMH,ANK3,AP3B2,ARF3,ARHGEF3,ARHGEF33,ARL5A,ARVCF,ASH1L,ASPN,ASTN2,ATN1,ATP5IF1,BAZ2B,BCL11A,BEND4,BHLHE40,BIRC6,BMS1,BPIFB3,BST1,C1QL4,CAB39,CACNA1D,CACNA1I,CACNA1S,CADM2,CADPS2,CALN1,CAMK1D,CAMKMT,CAPN6,CARF,CASP8,CBR4,CCDC66,CCDC71,CCDC85A,CD160,CD276,CDC45,CDH23,CD…	535
Diseases and Disorders	Cancer,Gastrointestinal Disease,Organismal Injury and Abnormalities	gastro-esophageal carcinoma	Gastro-esophageal carcinoma	5.65e-27	1.12e-24	AADAC,ABCA2,ABCA7,ABCB9,ABCC1,ABCF2,ABCG8,ACAA1,ADAM23,ADCY2,AEBP1,AFF3,AGBL4,AGRN,AKAP9,ALDH18A1,ALPK3,ANK3,ANKRD34C,ARHGAP26,ASB3/GPR75-ASB3,ASH1L,ASPN,ASTN2,ATN1,BAG5,BAZ2B,BCL11A,BEND4,BIRC6,BMS1,BNC1,BPIFB3,BST1,C10orf67,CACNA1D,CACNA1I,CACNA1S,CACNA2D3,CADPS2,CALN1,CAPN6,CARF,CASP8,CCDC92,CD47,CDC45,CDHR1,CDX2,CELSR3,CENPJ,CENPT,CHDH,CHGB,CHRNA7,CHRNB4,CHST5,CHST6,CIBAR1,CKB,CLDN5,CMTM5,CNT…	357
Diseases and Disorders	Cancer,Gastrointestinal Disease,Organismal Injury and Abnormalities	hepato-pancreato-biliary cancer	Hepato-pancreato-biliary cancer	6.14e-27	1.2e-24	AADAC,ABCA2,ABCA7,ABCC1,ABCC6,ABCG8,ABHD16A,ACAA1,ACO2,ACTR3,ADAM23,ADAMTS6,ADAT1,ADCY2,ADRM1,ADSL,AEBP1,AFF3,AGBL4,AGRN,AIFM3,AKAP9,ALDH7A1,AMH,ANK3,ANKRD34C,AP3B2,ARHGEF3,ARHGEF33,ARVCF,ASB3/GPR75-ASB3,ASH1L,ASPN,ASTN2,ATN1,B3GNT4,BAG5,BAZ2B,BCL11A,BEND4,BHLHE40,BIRC6,BMS1,BNC1,BPIFB3,BRPF3,BST1,C10orf67,C1QL4,C20orf204,C2orf49,CABLES2,CACNA1D,CACNA1I,CACNA1S,CACNA2D3,CADM2,CADPS2,CALN1,CAMK1D,…	490
Diseases and Disorders	Cancer,Dermatological Diseases and Conditions,Organismal Injury and Abnormalities	skin tumor	Skin tumor	6.58e-27	1.27e-24	AADAC,ABCA2,ABCA7,ABCB9,ABCC1,ABCC6,ABCG8,ABHD16A,ABI2,ACAA1,ACO2,ACTR3,ACTR8,ADAM23,ADAMTS6,ADAT1,ADRM1,AEBP1,AFF3,AGBL4,AGRN,AHCY,AIFM3,AKAP9,ALDH18A1,ALDH7A1,ALPK3,AMH,ANK3,ANKRD34C,ANKRD45,AP3B2,ARHGAP26,ARHGEF3,ARHGEF33,ARIH2OS,ARL8B,ARVCF,ASB3/GPR75-ASB3,ASH1L,ASTN2,ATN1,B3GNT4,BAG5,BAZ2B,BBX,BCL11A,BEND4,BIRC6,BMS1,BNC1,BPIFB3,BRPF3,C12orf54,CABLES2,CACNA1D,CACNA1I,CACNA1S,CACNA2D3,CADM2,C…	606
Diseases and Disorders	Cancer,Gastrointestinal Disease,Hepatic System Disease,Organismal Injury and Abnormalities	cancer	Liver cancer	6.83e-27	1.31e-24	AADAC,ABCA2,ABCA7,ABCC1,ABCC6,ABCG8,ABHD16A,ACAA1,ACO2,ACTR3,ADAM23,ADAMTS6,ADAT1,ADCY2,ADRM1,AEBP1,AFF3,AGBL4,AGRN,AIFM3,AKAP9,ALDH7A1,AMH,ANK3,ANKRD34C,ARHGEF3,ARVCF,ASB3/GPR75-ASB3,ASH1L,ASPN,ASTN2,ATN1,BAG5,BAZ2B,BCL11A,BEND4,BHLHE40,BIRC6,BMS1,BNC1,C1QL4,C20orf204,C2orf49,CABLES2,CACNA1D,CACNA1I,CACNA1S,CACNA2D3,CADM2,CADPS2,CALN1,CAMK1D,CARF,CASP8,CCDC92,CD276,CD47,CDC45,CDH23,CDH7,CDHR1,CD…	402
Diseases and Disorders	Cancer,Gastrointestinal Disease,Organismal Injury and Abnormalities	hepatobiliary carcinoma	Hepatobiliary carcinoma	9.09e-27	1.72e-24	AADAC,ABCA2,ABCA7,ABCC1,ABCC6,ABCG8,ABHD16A,ACAA1,ACO2,ACTR3,ADAM23,ADAMTS6,ADAT1,ADCY2,ADRM1,AEBP1,AFF3,AGBL4,AGRN,AIFM3,AKAP9,ALDH7A1,AMH,ANK3,ANKRD34C,ARHGEF3,ARVCF,ASB3/GPR75-ASB3,ASH1L,ASPN,ASTN2,ATN1,B3GNT4,BAG5,BAZ2B,BCL11A,BEND4,BHLHE40,BIRC6,BMS1,BNC1,C1QL4,C20orf204,C2orf49,CABLES2,CACNA1D,CACNA1I,CACNA1S,CACNA2D3,CADM2,CADPS2,CALN1,CAMK1D,CARF,CASP8,CCDC92,CD276,CD47,CDC45,CDH23,CDH7,C…	417
Diseases and Disorders	Cancer,Organismal Injury and Abnormalities	breast or gastric cancer	Breast or gastric cancer	9.95e-27	1.86e-24	AADAC,ABCA2,ABCA7,ABCB9,ABCC1,ABCF2,ABI2,ACAA1,ADAM23,ADAMTS6,ADCY2,ADRM1,AEBP1,AFF3,AGBL4,AGRN,AKAP9,ALDH18A1,ALDH7A1,ALKBH6,ALPK3,ANK3,ANKRD34C,AP3B2,ARF3,ARHGAP26,ARHGEF3,ARHGEF33,ASB3/GPR75-ASB3,ASH1L,ASPN,ASTN2,ATN1,ATP5IF1,BAG5,BAZ2B,BCL11A,BEND4,BHLHE40,BIRC6,BMS1,BNC1,BPIFB3,BRPF3,C10orf67,CAB39,CACNA1D,CACNA1I,CACNA1S,CACNA2D3,CADPS2,CALN1,CAMKMT,CAPN6,CARF,CASP8,CBR4,CCDC85A,CD160,CD276…	498
Diseases and Disorders	Cancer,Organismal Injury and Abnormalities	malignant solid organ tumor	Malignant solid organ tumor	1.05e-26	1.94e-24	AADAC,ABCA2,ABCA7,ABCB9,ABCC1,ABCC6,ABCG8,ABHD16A,ABI2,ACAA1,ACO2,ACTR3,ACTR8,ADAM23,ADAMTS6,ADAT1,ADRM1,AEBP1,AFF3,AGBL4,AGRN,AHCY,AIFM3,AKAP9,ALDH18A1,ALDH7A1,ALPK3,AMH,ANK3,ANKRD34C,ANKRD45,AP3B2,ARHGAP26,ARHGEF3,ARHGEF33,ARIH2OS,ARL8B,ARVCF,ASB3/GPR75-ASB3,ASH1L,ASPN,ASTN2,ATN1,B3GNT4,BAG5,BAZ2B,BBX,BCL11A,BEND4,BIRC6,BMS1,BNC1,BPIFB3,BRPF3,C12orf54,CABLES2,CACNA1D,CACNA1I,CACNA1S,CACNA2D3,CA…	608
Diseases and Disorders	Cancer,Dermatological Diseases and Conditions,Organismal Injury and Abnormalities	skin cancer	Skin cancer	1.24e-26	2.25e-24	AADAC,ABCA2,ABCA7,ABCB9,ABCC1,ABCC6,ABCG8,ABHD16A,ABI2,ACAA1,ACO2,ACTR3,ACTR8,ADAM23,ADAMTS6,ADAT1,ADRM1,AEBP1,AFF3,AGBL4,AGRN,AHCY,AIFM3,AKAP9,ALDH18A1,ALDH7A1,ALPK3,AMH,ANK3,ANKRD34C,ANKRD45,AP3B2,ARHGAP26,ARHGEF3,ARHGEF33,ARIH2OS,ARL8B,ARVCF,ASB3/GPR75-ASB3,ASH1L,ASTN2,ATN1,B3GNT4,BAG5,BAZ2B,BBX,BCL11A,BEND4,BIRC6,BMS1,BNC1,BPIFB3,BRPF3,C12orf54,CABLES2,CACNA1D,CACNA1I,CACNA1S,CACNA2D3,CADM2,C…	604
Diseases and Disorders	Cancer,Gastrointestinal Disease,Organismal Injury and Abnormalities	gastric epithelial cancer	Gastric carcinoma	1.25e-26	2.25e-24	AADAC,ABCA2,ABCA7,ABCB9,ABCC1,ABCF2,ACAA1,ADAM23,ADCY2,AEBP1,AFF3,AGBL4,AGRN,AKAP9,ALDH18A1,ALPK3,ANK3,ANKRD34C,ARHGAP26,ASB3/GPR75-ASB3,ASH1L,ASPN,ASTN2,ATN1,BAG5,BAZ2B,BCL11A,BEND4,BIRC6,BMS1,BNC1,BPIFB3,C10orf67,CACNA1D,CACNA1I,CACNA1S,CACNA2D3,CADPS2,CALN1,CAPN6,CARF,CASP8,CD47,CDC45,CDHR1,CDX2,CELSR3,CENPJ,CENPT,CHDH,CHGB,CHRNB4,CHST5,CHST6,CIBAR1,CKB,CLDN5,CMTM5,CNTN6,CNTNAP2,CNTNAP4,CNTNAP…	337
Diseases and Disorders	Cancer,Gastrointestinal Disease,Organismal Injury and Abnormalities	hepatobiliary neoplasm	Hepatobiliary neoplasm	1.32e-26	2.35e-24	AADAC,ABCA2,ABCA7,ABCC1,ABCC6,ABCG8,ABHD16A,ABI2,ACAA1,ACO2,ACTR3,ADAM23,ADAMTS6,ADAT1,ADCY2,ADRM1,AEBP1,AFF3,AGBL4,AGRN,AIFM3,AKAP9,ALDH7A1,AMH,ANK3,ANKRD34C,ARHGEF3,ARIH2OS,ARVCF,ASB3/GPR75-ASB3,ASH1L,ASPN,ASTN2,ATN1,B3GNT4,BAG5,BAZ2B,BBX,BCL11A,BEND4,BHLHE40,BIRC6,BMS1,BNC1,C1QL4,C20orf204,C2orf49,CABLES2,CACNA1D,CACNA1I,CACNA1S,CACNA2D3,CADM2,CADPS2,CALN1,CAMK1D,CARF,CASP8,CCDC71,CCDC92,CD276…	464
Diseases and Disorders	Cancer,Gastrointestinal Disease,Organismal Injury and Abnormalities	gastroesophageal cancer	Gastroesophageal cancer	5.77e-26	1.02e-23	AADAC,ABCA2,ABCA7,ABCB9,ABCC1,ABCF2,ABCG8,ACAA1,ADAM23,ADCY2,AEBP1,AFF3,AGBL4,AGRN,AKAP9,ALDH18A1,ALPK3,ANK3,ANKRD34C,ARHGAP26,ASB3/GPR75-ASB3,ASH1L,ASPN,ASTN2,ATN1,BAG5,BAZ2B,BCL11A,BEND4,BIRC6,BMS1,BNC1,BPIFB3,BST1,C10orf67,CACNA1D,CACNA1I,CACNA1S,CACNA2D3,CADPS2,CALN1,CAPN6,CARF,CASP8,CCDC92,CD47,CDC45,CDHR1,CDKN1A,CDX2,CELSR3,CENPJ,CENPT,CHDH,CHGB,CHRNA7,CHRNB4,CHST5,CHST6,CIBAR1,CKB,CLDN5,CM…	364
Diseases and Disorders	Cancer,Gastrointestinal Disease,Organismal Injury and Abnormalities	stomach tumor	Stomach tumor	8.86e-26	1.55e-23	AADAC,ABCA2,ABCA7,ABCB9,ABCC1,ABCF2,ACAA1,ADAM23,ADCY2,AEBP1,AFF3,AGBL4,AGRN,AKAP9,ALDH18A1,ALPK3,ANK3,ANKRD34C,ARHGAP26,ASB3/GPR75-ASB3,ASH1L,ASPN,ASTN2,ATN1,BAG5,BAZ2B,BCL11A,BEND4,BIRC6,BMS1,BNC1,BPIFB3,C10orf67,CACNA1D,CACNA1I,CACNA1S,CACNA2D3,CADPS2,CALN1,CAPN6,CARF,CASP8,CD47,CDC45,CDHR1,CDKN1A,CDX2,CELSR3,CENPJ,CENPT,CHDH,CHGB,CHRNB4,CHST5,CHST6,CIBAR1,CKB,CLDN5,CMTM5,CNTN6,CNTNAP2,CNTNAP4…	346
Diseases and Disorders	Cancer,Gastrointestinal Disease,Hepatic System Disease,Organismal Injury and Abnormalities	hepatobiliary system cancer	Hepatobiliary system cancer	3.79e-25	6.54e-23	AADAC,ABCA2,ABCA7,ABCC1,ABCC6,ABCG8,ABHD16A,ACAA1,ACO2,ACTR3,ADAM23,ADAMTS6,ADAT1,ADCY2,ADRM1,AEBP1,AFF3,AGBL4,AGRN,AIFM3,AKAP9,ALDH7A1,AMH,ANK3,ANKRD34C,ARHGEF3,ARVCF,ASB3/GPR75-ASB3,ASH1L,ASPN,ASTN2,ATN1,B3GNT4,BAG5,BAZ2B,BCL11A,BEND4,BHLHE40,BIRC6,BMS1,BNC1,C1QL4,C20orf204,C2orf49,CABLES2,CACNA1D,CACNA1I,CACNA1S,CACNA2D3,CADM2,CADPS2,CALN1,CAMK1D,CARF,CASP8,CCDC92,CD276,CD47,CDC45,CDH23,CDH7,C…	421
Diseases and Disorders	Cancer,Gastrointestinal Disease,Organismal Injury and Abnormalities	gastric cancer	Gastric cancer	3.89e-25	6.64e-23	AADAC,ABCA2,ABCA7,ABCB9,ABCC1,ABCF2,ACAA1,ADAM23,ADCY2,AEBP1,AFF3,AGBL4,AGRN,AKAP9,ALDH18A1,ALPK3,ANK3,ANKRD34C,ARHGAP26,ASB3/GPR75-ASB3,ASH1L,ASPN,ASTN2,ATN1,BAG5,BAZ2B,BCL11A,BEND4,BIRC6,BMS1,BNC1,BPIFB3,C10orf67,CACNA1D,CACNA1I,CACNA1S,CACNA2D3,CADPS2,CALN1,CAPN6,CARF,CASP8,CD47,CDC45,CDHR1,CDX2,CELSR3,CENPJ,CENPT,CHDH,CHGB,CHRNB4,CHST5,CHST6,CIBAR1,CKB,CLDN5,CMTM5,CNTN6,CNTNAP2,CNTNAP4,CNTNAP…	343
Diseases and Disorders	Cancer,Neurological Disease,Organismal Injury and Abnormalities	glioma cancer	Grade 3-4 glioma cancer	6.8e-25	1.15e-22	ABCA2,ABCA7,ABCC1,ABCC6,ABCF2,ABCG8,ACAA1,ADAMTS6,ADCY2,ADSL,AFF3,AGRN,AHCY,AKAP9,ALDH18A1,ALPK3,AMH,ANK3,ANKRD34C,ANKRD45,AP3B2,ARHGEF33,ARL8B,ARVCF,ASB3/GPR75-ASB3,ASH1L,ASTN2,ATN1,B3GNT4,BAG5,BAZ2B,BBX,BCL11A,BCL7A,BHLHE40,BIRC6,BMS1,BRPF3,C10orf67,C1QL4,CACNA1D,CACNA1I,CACNA1S,CACNA2D3,CADPS2,CALN1,CASP8,CBR4,CCDC66,CCDC71,CCDC85A,CCDC92,CD276,CDC45,CDH23,CDH7,CDHR1,CDK2AP1,CDKN1A,CELSR3,CENP…	450
Diseases and Disorders	Cancer,Organismal Injury and Abnormalities	malignant soft tissue neoplasm	Malignant soft tissue neoplasm	7.76e-25	1.3e-22	AADAC,ABCA2,ABCA7,ABCB9,ABCC1,ABCC6,ABCG8,ABHD16A,ABI2,ACAA1,ACO2,ACTR3,ACTR8,ADAM23,ADAMTS6,ADRM1,AEBP1,AFF3,AGBL4,AGRN,AHCY,AIFM3,AKAP9,ALDH18A1,ALDH7A1,ALKBH6,ALPK3,AMH,ANK3,ANKRD34C,ANKRD45,AP3B2,ARHGAP26,ARHGEF33,ARIH2OS,ARL8B,ARVCF,ASB3/GPR75-ASB3,ASH1L,ASPN,ASTN2,ATN1,B3GNT4,BAZ2B,BBX,BCL11A,BEND4,BIRC6,BNC1,BPIFB3,BRPF3,C12orf54,CABLES2,CACNA1D,CACNA1I,CACNA1S,CACNA2D3,CADM2,CADPS2,CALN1,…	583
Diseases and Disorders	Cancer,Organismal Injury and Abnormalities	grade 3-4 tumor	Grade 3-4 tumor	8.07e-25	1.34e-22	ABCA2,ABCA7,ABCC1,ABCC6,ABCF2,ABCG8,ACAA1,ADAMTS6,ADCY2,ADSL,AFF3,AGRN,AHCY,AKAP9,ALDH18A1,ALPK3,AMH,ANK3,ANKRD34C,ANKRD45,AP3B2,ARHGEF33,ARL8B,ARVCF,ASB3/GPR75-ASB3,ASH1L,ASTN2,ATN1,B3GNT4,BAG5,BAZ2B,BBX,BCL11A,BCL7A,BHLHE40,BIRC6,BMS1,BRPF3,C10orf67,C1QL4,CACNA1D,CACNA1I,CACNA1S,CACNA2D3,CADPS2,CALN1,CASP8,CBR4,CCDC66,CCDC71,CCDC85A,CCDC92,CD276,CDC45,CDH23,CDH7,CDHR1,CDK2AP1,CDKN1A,CELSR3,CENP…	452
Diseases and Disorders	Cancer,Dermatological Diseases and Conditions,Organismal Injury and Abnormalities	cutaneous melanoma	Cutaneous melanoma	1.14e-24	1.86e-22	AADAC,ABCA2,ABCA7,ABCB9,ABCC1,ABCC6,ABCG8,ABHD16A,ABI2,ACAA1,ACO2,ACTR3,ACTR8,ADAM23,ADAMTS6,ADRM1,AEBP1,AFF3,AGBL4,AGRN,AHCY,AIFM3,AKAP9,ALDH18A1,ALDH7A1,ALPK3,AMH,ANK3,ANKRD34C,ANKRD45,AP3B2,ARHGAP26,ARHGEF33,ARIH2OS,ARL8B,ARVCF,ASB3/GPR75-ASB3,ASH1L,ASTN2,ATN1,B3GNT4,BAZ2B,BBX,BCL11A,BEND4,BIRC6,BNC1,BPIFB3,BRPF3,C12orf54,CABLES2,CACNA1D,CACNA1I,CACNA1S,CACNA2D3,CADM2,CADPS2,CALN1,CAMK1D,CAMKM…	566
Diseases and Disorders	Cancer,Organismal Injury and Abnormalities	malignant connective or soft tissue neoplasm	Malignant connective or soft tissue neoplasm	1.44e-24	2.33e-22	AADAC,ABCA2,ABCA7,ABCB9,ABCC1,ABCC6,ABCG8,ABHD16A,ABI2,ACAA1,ACO2,ACTR3,ACTR8,ADAM23,ADAMTS6,ADRM1,AEBP1,AFF3,AGBL4,AGRN,AHCY,AIFM3,AKAP9,ALDH18A1,ALDH7A1,ALKBH6,ALPK3,AMH,ANK3,ANKRD34C,ANKRD45,AP3B2,ARHGAP26,ARHGEF33,ARIH2OS,ARL8B,ARVCF,ASB3/GPR75-ASB3,ASH1L,ASPN,ASTN2,ATN1,B3GNT4,BAZ2B,BBX,BCL11A,BEND4,BIRC6,BNC1,BPIFB3,BRPF3,C12orf54,CABLES2,CACNA1D,CACNA1I,CACNA1S,CACNA2D3,CADM2,CADPS2,CALN1,…	588
Diseases and Disorders	Cancer,Organismal Injury and Abnormalities	pelvic adenocarcinoma	Pelvic adenocarcinoma	1.76e-24	2.82e-22	ABCA2,ABCB9,ABCC1,ABCC6,ABCF2,ABI2,ADAM23,ADAMTS6,ADAT1,ADCY2,ADM,ADSL,AEBP1,AFF3,AGBL4,AHCY,AKAP9,ALDH18A1,ALDH7A1,ALPK3,ANK3,ANKRD34C,AP3B2,ARHGAP26,ARHGEF3,ARHGEF33,ARL8B,ARVCF,ASB3/GPR75-ASB3,ASH1L,ASPN,ASTN2,B3GNT4,BAZ2B,BCL11A,BHLHE40,BIRC6,BMS1,BNC1,BRPF3,BST1,C10orf67,C22orf39,CACNA1D,CACNA1S,CACNA2D3,CADPS2,CALN1,CAPN6,CARF,CASP8,CCDC66,CCDC85A,CD47,CDC45,CDH23,CDH7,CDHR1,CDKN1A,CDX2,CEL…	505
Diseases and Disorders	Cancer,Organismal Injury and Abnormalities	development	Development of adenocarcinoma	4.1e-24	6.52e-22	ABCA2,ABCB9,ABCC1,ABCC6,ABCF2,ABI2,ADAM23,ADCY2,ADM,ADSL,AEBP1,AFF3,AGBL4,AGRN,AHCY,AKAP9,ALDH7A1,ALPK3,ANK3,ANKRD34C,AP3B2,ARHGAP26,ARHGEF33,ARL8B,ARVCF,ASB3/GPR75-ASB3,ASH1L,ASPN,ASTN2,ATP5IF1,B3GNT4,BAZ2B,BCL11A,BEND4,BHLHE40,BIRC6,BMS1,BNC1,BRPF3,BST1,C2orf49,CACNA1D,CACNA1I,CACNA1S,CACNA2D3,CADM2,CADPS2,CAPN6,CARF,CASP8,CCDC66,CCDC71,CCDC85A,CD47,CDC45,CDH23,CDH7,CDHR1,CDKN1A,CDX2,CELSR3,CEN…	486
Diseases and Disorders	Cancer,Organismal Injury and Abnormalities	connective or soft tissue tumor	Connective or soft tissue tumor	6.61e-24	1.04e-21	AADAC,ABCA2,ABCA7,ABCB9,ABCC1,ABCC6,ABCG8,ABHD16A,ABI2,ACAA1,ACO2,ACTR3,ACTR8,ADAM23,ADAMTS6,ADRM1,AEBP1,AFF3,AGBL4,AGRN,AHCY,AIFM3,AKAP9,ALDH18A1,ALDH7A1,ALKBH6,ALPK3,AMH,ANK3,ANKRD34C,ANKRD45,AP3B2,ARHGAP26,ARHGEF33,ARIH2OS,ARL8B,ARVCF,ASB3/GPR75-ASB3,ASH1L,ASPN,ASTN2,ATN1,B3GNT4,BAZ2B,BBX,BCL11A,BEND4,BIRC6,BNC1,BPIFB3,BRPF3,C12orf54,CABLES2,CACNA1D,CACNA1I,CACNA1S,CACNA2D3,CADM2,CADPS2,CALN1,…	591
Diseases and Disorders	Cancer,Gastrointestinal Disease,Organismal Injury and Abnormalities	colorectal cancer	Colorectal cancer	7.14e-24	1.11e-21	ABCA2,ABCB9,ABCC1,ABCF2,ABI2,ACO2,ACTR8,ADAM23,ADCY2,ADM,ADSL,AEBP1,AFF3,AGRN,AHCY,AKAP9,ALPK3,AMH,ANK3,ARHGEF3,ARHGEF33,ARL5A,ARVCF,ASH1L,ASPN,ASTN2,ATP5IF1,BAZ2B,BCL11A,BEND4,BHLHE40,BIRC6,BMS1,BST1,C1QL4,CAB39,CACNA1D,CACNA1S,CADM2,CADPS2,CALN1,CAMK1D,CAMKMT,CAPN6,CARF,CASP8,CCDC66,CCDC71,CCDC85A,CDC45,CDH23,CDH7,CDHR1,CDK2AP1,CDKN1A,CDX2,CELSR3,CENPJ,CENPT,CEP85L,CEPT1,CERS5,CHMP1A,CHST5,CLCA…	455
Diseases and Disorders	Cancer,Organismal Injury and Abnormalities,Reproductive System Disease	genital carcinoma	Genital carcinoma	8.68e-24	1.34e-21	AADAC,ABCA2,ABCB9,ABCC1,ABCC6,ABCF2,ABI2,ADAM23,ADAMTS6,ADAT1,ADCY2,ADM,ADSL,AEBP1,AFF3,AGBL4,AHCY,AKAP9,ALDH18A1,ALDH7A1,ALPK3,ANK3,ANKRD34C,AP3B2,ARHGAP26,ARHGEF3,ARHGEF33,ARL8B,ARVCF,ASB3/GPR75-ASB3,ASH1L,ASPN,ASTN2,B3GNT4,BAZ2B,BCL11A,BHLHE40,BIRC6,BMS1,BNC1,BRPF3,BST1,C10orf67,C22orf39,CACNA1D,CACNA1S,CACNA2D3,CADPS2,CALN1,CAPN6,CARF,CASP8,CCDC66,CCDC85A,CD47,CDC45,CDH23,CDH7,CDHR1,CDKN1A,CD…	511
Diseases and Disorders	Cancer,Organismal Injury and Abnormalities,Reproductive System Disease	genital tract cancer	Genital tract cancer	1.53e-23	2.34e-21	AADAC,ABCA2,ABCB9,ABCC1,ABCC6,ABCF2,ABI2,ACTR3,ADAM23,ADAMTS6,ADAT1,ADCY2,ADM,ADRM1,ADSL,AEBP1,AFF3,AGBL4,AHCY,AKAP9,ALDH18A1,ALDH7A1,ALKBH6,ALPK3,ANK3,ANKRD34C,AP3B2,ARHGAP26,ARHGEF3,ARHGEF33,ARL8B,ARVCF,ASB3/GPR75-ASB3,ASH1L,ASPN,ASTN2,B3GNT4,BAZ2B,BCL11A,BHLHE40,BIRC6,BMS1,BNC1,BRPF3,BST1,C10orf67,C22orf39,CACNA1D,CACNA1I,CACNA1S,CACNA2D3,CADPS2,CALN1,CAPN6,CARF,CASP8,CCDC66,CCDC85A,CD47,CDC45…	537
Diseases and Disorders	Cancer,Organismal Injury and Abnormalities,Reproductive System Disease	genital tumor	Genital tumor	1.7e-23	2.58e-21	AADAC,ABCA2,ABCB9,ABCC1,ABCC6,ABCF2,ABI2,ACTR3,ADAM23,ADAMTS6,ADAT1,ADCY2,ADM,ADRM1,ADSL,AEBP1,AFF3,AGBL4,AHCY,AKAP9,ALDH18A1,ALDH7A1,ALKBH6,ALPK3,AMH,ANK3,ANKRD34C,AP3B2,ARHGAP26,ARHGEF3,ARHGEF33,ARL8B,ARVCF,ASB3/GPR75-ASB3,ASH1L,ASPN,ASTN2,B3GNT4,BAZ2B,BCL11A,BHLHE40,BIRC6,BMS1,BNC1,BRPF3,BST1,C10orf67,C22orf39,CACNA1D,CACNA1I,CACNA1S,CACNA2D3,CADPS2,CALN1,CAPN6,CARF,CASP8,CCDC66,CCDC85A,CD47,C…	543
Diseases and Disorders	Cancer,Gastrointestinal Disease,Organismal Injury and Abnormalities	colorectal neoplasia	Colorectal tumor	1.74e-23	2.61e-21	ABCA2,ABCB9,ABCC1,ABCF2,ABI2,ACO2,ACTR8,ADAM23,ADCY2,ADM,ADSL,AEBP1,AFF3,AGRN,AHCY,AKAP9,ALPK3,AMH,ANK3,ARHGEF3,ARHGEF33,ARL5A,ARVCF,ASH1L,ASPN,ASTN2,ATP5IF1,BAZ2B,BCL11A,BEND4,BHLHE40,BIRC6,BMS1,BST1,C1QL4,CAB39,CACNA1D,CACNA1S,CADM2,CADPS2,CALN1,CAMK1D,CAMKMT,CAPN6,CARF,CASP8,CCDC66,CCDC71,CCDC85A,CD276,CDC45,CDH23,CDH7,CDHR1,CDK2AP1,CDKN1A,CDX2,CELSR3,CENPJ,CENPT,CEP85L,CEPT1,CERS5,CHMP1A,CHST…	459
Diseases and Disorders	Cancer,Organismal Injury and Abnormalities,Reproductive System Disease	development	Development of genital tumor	1.03e-22	1.53e-20	AADAC,ABCA2,ABCB9,ABCC1,ABCC6,ABCF2,ABI2,ACTR3,ADAM23,ADCY2,ADM,ADSL,AEBP1,AFF3,AGBL4,AHCY,AKAP9,ALDH7A1,ALKBH6,ALPK3,AMH,ANK3,ANKRD34C,AP3B2,ARHGAP26,ARHGEF33,ARL8B,ARVCF,ASB3/GPR75-ASB3,ASH1L,ASPN,ASTN2,B3GNT4,BAZ2B,BCL11A,BHLHE40,BIRC6,BMS1,BNC1,BRPF3,BST1,CACNA1D,CACNA1I,CACNA2D3,CADPS2,CAPN6,CARF,CASP8,CCDC66,CCDC85A,CD47,CDH23,CDH7,CDHR1,CDKN1A,CDX2,CELSR3,CENPJ,CEP128,CHADL,CHRNA7,CHRNB4,C…	449
Diseases and Disorders	Cancer,Neurological Disease,Organismal Injury and Abnormalities	astrocytoma	Grade 1-4 astrocytoma	1.49e-22	2.2e-20	ABCA2,ABCA7,ABCC1,ABCC6,ABCF2,ABCG8,ACAA1,ADAMTS6,ADCY2,ADSL,AFF3,AGRN,AHCY,AKAP9,ALDH18A1,ALPK3,AMH,ANK3,ANKRD34C,ANKRD45,AP3B2,ARHGEF33,ASB3/GPR75-ASB3,ASTN2,ATN1,B3GNT4,BAG5,BAZ2B,BBX,BCL11A,BCL7A,BHLHE40,BIRC6,BMS1,BRPF3,C10orf67,CACNA1D,CACNA1I,CACNA1S,CACNA2D3,CADPS2,CALN1,CASP8,CBR4,CCDC66,CCDC71,CCDC92,CD276,CDH23,CDH7,CDHR1,CDK2AP1,CDKN1A,CELSR3,CENPT,CEP128,CEPT1,CHADL,CHGB,CHST5,CIBAR1…	404
Diseases and Disorders	Cancer,Neurological Disease,Organismal Injury and Abnormalities	high grade astrocytoma	High grade astrocytoma	1.54e-22	2.25e-20	ABCA2,ABCA7,ABCC1,ABCC6,ABCF2,ABCG8,ACAA1,ADAMTS6,ADCY2,ADSL,AFF3,AGRN,AHCY,AKAP9,ALDH18A1,ALPK3,AMH,ANK3,ANKRD34C,ANKRD45,AP3B2,ARHGEF33,ASB3/GPR75-ASB3,ASTN2,ATN1,B3GNT4,BAG5,BAZ2B,BBX,BCL11A,BCL7A,BHLHE40,BIRC6,BMS1,BRPF3,C10orf67,CACNA1D,CACNA1I,CACNA1S,CACNA2D3,CADPS2,CALN1,CASP8,CBR4,CCDC66,CCDC71,CCDC92,CD276,CDH23,CDH7,CDHR1,CDK2AP1,CDKN1A,CELSR3,CENPT,CEP128,CEPT1,CHADL,CHGB,CHST5,CIBAR1…	416
Diseases and Disorders	Cancer,Neurological Disease,Organismal Injury and Abnormalities	high grade glioma	Grade 4 high grade glioma	1.82e-22	2.6e-20	ABCA2,ABCA7,ABCC1,ABCC6,ABCF2,ABCG8,ACAA1,ADAMTS6,ADCY2,ADSL,AFF3,AGRN,AHCY,AKAP9,ALDH18A1,ALPK3,AMH,ANK3,ANKRD34C,ANKRD45,AP3B2,ARHGEF33,ASB3/GPR75-ASB3,ASTN2,ATN1,B3GNT4,BAG5,BAZ2B,BBX,BCL11A,BCL7A,BHLHE40,BIRC6,BMS1,BRPF3,C10orf67,CACNA1D,CACNA1I,CACNA1S,CACNA2D3,CADPS2,CALN1,CASP8,CBR4,CCDC66,CCDC71,CCDC92,CD276,CDH23,CDH7,CDHR1,CDK2AP1,CDKN1A,CELSR3,CENPT,CEP128,CEPT1,CHADL,CHGB,CHST5,CIBAR1…	402
Diseases and Disorders	Cancer,Neurological Disease,Organismal Injury and Abnormalities	astrocytoma	Grade 4 astrocytoma	1.82e-22	2.6e-20	ABCA2,ABCA7,ABCC1,ABCC6,ABCF2,ABCG8,ACAA1,ADAMTS6,ADCY2,ADSL,AFF3,AGRN,AHCY,AKAP9,ALDH18A1,ALPK3,AMH,ANK3,ANKRD34C,ANKRD45,AP3B2,ARHGEF33,ASB3/GPR75-ASB3,ASTN2,ATN1,B3GNT4,BAG5,BAZ2B,BBX,BCL11A,BCL7A,BHLHE40,BIRC6,BMS1,BRPF3,C10orf67,CACNA1D,CACNA1I,CACNA1S,CACNA2D3,CADPS2,CALN1,CASP8,CBR4,CCDC66,CCDC71,CCDC92,CD276,CDH23,CDH7,CDHR1,CDK2AP1,CDKN1A,CELSR3,CENPT,CEP128,CEPT1,CHADL,CHGB,CHST5,CIBAR1…	402
Diseases and Disorders	Cancer,Organismal Injury and Abnormalities,Reproductive System Disease	uterine tumor	Uterine tumor	3.5e-22	4.97e-20	AADAC,ABCA2,ABCC1,ABCC6,ABCF2,ABI2,ACTR3,ADAM23,ADCY2,ADM,ADSL,AFF3,AGBL4,AHCY,AKAP9,ALKBH6,ALPK3,ANK3,AP3B2,ARHGAP26,ARHGEF33,ARL8B,ARVCF,ASB3/GPR75-ASB3,ASH1L,ASPN,ASTN2,B3GNT4,BAZ2B,BCL11A,BHLHE40,BIRC6,BMS1,BNC1,BRPF3,BST1,CACNA1D,CACNA1I,CACNA2D3,CADPS2,CAPN6,CARF,CASP8,CCDC66,CCDC85A,CDH23,CDH7,CDHR1,CELSR3,CENPJ,CEP128,CHADL,CHRNA7,CHRNB4,CHST5,CIBAR1,CLCA2,CLCA4,CLDN5,CLTCL1,CNTN6,CNTNAP2…	409
Diseases and Disorders	Cancer,Organismal Injury and Abnormalities,Reproductive System Disease	breast or gynecological cancer	Breast or gynecological cancer	4.04e-22	5.68e-20	AADAC,ABCA2,ABCB9,ABCC1,ABCC6,ABCF2,ABI2,ACAA1,ACTR3,ADAM23,ADAMTS6,ADCY2,ADM,ADRM1,ADSL,AEBP1,AFF3,AGBL4,AGRN,AHCY,AKAP9,ALDH18A1,ALDH7A1,ALKBH6,ALPK3,ANK3,ANKRD34C,AP3B2,ARF3,ARHGAP26,ARHGEF3,ARHGEF33,ARL8B,ARVCF,ASB3/GPR75-ASB3,ASH1L,ASPN,ASTN2,ATN1,ATP5IF1,B3GNT4,BAZ2B,BCL11A,BHLHE40,BIRC6,BMS1,BNC1,BPIFB3,BRPF3,BST1,CAB39,CACNA1D,CACNA1I,CACNA1S,CACNA2D3,CADPS2,CALN1,CAMKMT,CAPN6,CARF,CASP8,…	519
Diseases and Disorders	Cancer,Organismal Injury and Abnormalities,Reproductive System Disease	female genital tract adenocarcinoma	Female genital tract adenocarcinoma	5.93e-22	8.28e-20	ABCA2,ABCB9,ABCC1,ABCC6,ABCF2,ABI2,ADAM23,ADCY2,ADM,ADSL,AEBP1,AFF3,AGBL4,AHCY,AKAP9,ALDH7A1,ALPK3,ANK3,ANKRD34C,AP3B2,ARHGAP26,ARHGEF33,ARL8B,ARVCF,ASB3/GPR75-ASB3,ASH1L,ASPN,ASTN2,B3GNT4,BAZ2B,BCL11A,BIRC6,BMS1,BNC1,BRPF3,BST1,CACNA1D,CACNA2D3,CADPS2,CAPN6,CARF,CASP8,CCDC66,CCDC85A,CD47,CDH23,CDH7,CDHR1,CDKN1A,CDX2,CELSR3,CENPJ,CEP128,CHADL,CHRNB4,CHST5,CIBAR1,CLCA2,CLCA4,CLDN5,CLTCL1,CNTN6,CNT…	408
Diseases and Disorders	Cancer,Neurological Disease,Organismal Injury and Abnormalities	brain astrocytoma	Brain astrocytoma	6.06e-22	8.38e-20	ABCA2,ABCA7,ABCC1,ABCC6,ABCF2,ABCG8,ACAA1,ADAMTS6,ADCY2,ADSL,AFF3,AGRN,AHCY,AKAP9,ALDH18A1,ALPK3,AMH,ANK3,ANKRD34C,ANKRD45,AP3B2,ARHGEF33,ASB3/GPR75-ASB3,ASTN2,ATN1,B3GNT4,BAG5,BAZ2B,BBX,BCL11A,BCL7A,BHLHE40,BIRC6,BMS1,BRPF3,C10orf67,CACNA1D,CACNA1I,CACNA1S,CACNA2D3,CADPS2,CALN1,CASP8,CBR4,CCDC66,CCDC71,CCDC92,CD276,CDH23,CDH7,CDHR1,CDK2AP1,CELSR3,CENPT,CEP128,CEPT1,CHADL,CHGB,CHST5,CIBAR1,CLCA1,…	401
Diseases and Disorders	Neurological Disease,Organismal Injury and Abnormalities	cognitive impairment	Cognitive impairment	6.23e-22	8.47e-20	ABCA2,ALDH18A1,ALDH7A1,ANK3,ASH1L,ATN1,BCL11A,CACNA1D,CACNA1S,CACNA2D3,CADPS2,CARF,CD160,CD47,CDC45,CHMP1A,CHRNA7,CKB,CLCN2,CNTNAP2,COA8,COL4A2,COL6A3,COL9A2,COMT,CPS1,CPT1C,DCC,DGCR8,DNAH3,DPP4,DPP6,DRD2,DYNC2H1,EP300,EPHB2,ESR1,FBN2,FOXP1,GABRA2,GABRB3,GABRG1,GP1BB,GPR89A/GPR89B,GRIN2A,HCN1,HDC,HEXB,HGSNAT,IMPA1,KALRN,KANSL1,KCNH3,KCNJ11,KDM5B,KIDINS220,KMT2C,KMT2D,LINGO1,LIX1L,LMO3,LOC10272478…	128
Diseases and Disorders	Hereditary Disorder,Neurological Disease,Organismal Injury and Abnormalities	familial neurological disorder	Familial neurological disorder	6.27e-22	8.47e-20	ABCA2,ABCA7,ABCC1,ABHD16A,ACO2,ADAMTS6,ADCY2,ADM,AEBP1,AGRN,AHCY,ALDH18A1,ALDH7A1,ALPK3,ANK3,AP3B2,ASH1L,ASTN2,ATN1,ATP5IF1,BCL11A,BCL7A,BEND4,BHLHE40,BNC1,CAB39,CACNA1D,CACNA1S,CACNA2D3,CADPS2,CASP8,CD160,CDH23,CDX2,CEP85L,CHGB,CHMP1A,CHRNA7,CKB,CLCN2,CNTN6,CNTNAP2,COL4A2,COL5A1,COL6A3,COL8A1,COMT,CPNE5,CPT1C,CSMD1,CX3CL1,CXCL14,DAGLA,DBN1,DCC,DGCR8,DHDDS,DIABLO,DIO2,DNAH7,DNAJC13,DNAJC15,DPP6,D…	230
Diseases and Disorders	Cancer,Organismal Injury and Abnormalities,Reproductive System Disease	adenocarcinoma	Endometrial adenocarcinoma	6.28e-22	8.47e-20	ABCA2,ABCC1,ABCC6,ABCF2,ABI2,ADAM23,ADCY2,ADM,ADSL,AFF3,AGBL4,AHCY,AKAP9,ALPK3,ANK3,AP3B2,ARHGAP26,ARHGEF33,ARL8B,ARVCF,ASB3/GPR75-ASB3,ASH1L,ASPN,ASTN2,B3GNT4,BAZ2B,BCL11A,BIRC6,BMS1,BRPF3,BST1,CACNA1D,CACNA2D3,CADPS2,CAPN6,CARF,CASP8,CCDC66,CCDC85A,CDH23,CDH7,CDHR1,CELSR3,CENPJ,CEP128,CHADL,CHRNB4,CHST5,CIBAR1,CLCA2,CLCA4,CLTCL1,CNTN6,CNTNAP2,CNTNAP4,CNTNAP5,COL4A2,COL5A1,COL6A3,COL6A6,COL8A1,C…	357
Diseases and Disorders	Cancer,Organismal Injury and Abnormalities,Reproductive System Disease	endometrioid endometrial adenocarcinoma	Endometrioid endometrial adenocarcinoma	6.52e-22	8.72e-20	ABCA2,ABCC1,ABCC6,ABCF2,ABI2,ADAM23,ADCY2,ADSL,AFF3,AGBL4,AHCY,AKAP9,ALPK3,ANK3,AP3B2,ARHGAP26,ARHGEF33,ARL8B,ARVCF,ASB3/GPR75-ASB3,ASH1L,ASPN,ASTN2,B3GNT4,BAZ2B,BCL11A,BIRC6,BMS1,BRPF3,CACNA1D,CACNA2D3,CADPS2,CAPN6,CARF,CASP8,CCDC66,CCDC85A,CDH23,CDH7,CDHR1,CELSR3,CENPJ,CEP128,CHADL,CHRNB4,CHST5,CIBAR1,CLCA2,CLCA4,CLTCL1,CNTN6,CNTNAP2,CNTNAP4,CNTNAP5,COL4A2,COL5A1,COL6A3,COL6A6,COL8A1,CPS1,CPT1C…	352
Diseases and Disorders	Cancer,Organismal Injury and Abnormalities	breast or pancreatic cancer	Breast or pancreatic cancer	7.54e-22	1e-19	ABCA2,ABCA7,ABCB9,ABCC1,ABCF2,ABCG8,ABI2,ACAA1,ACTR3,ADAM23,ADAMTS6,ADCY2,ADRM1,ADSL,AEBP1,AFF3,AGBL4,AGRN,AKAP9,ALDH18A1,ALDH7A1,ALKBH6,ALPK3,ANKRD34C,AP3B2,ARF3,ARHGEF3,ARHGEF33,ASB3/GPR75-ASB3,ASH1L,ASTN2,ATN1,ATP5IF1,BAZ2B,BHLHE40,BIRC6,BMS1,BNC1,BPIFB3,BRPF3,BST1,C10orf67,CAB39,CACNA1D,CACNA1I,CACNA1S,CACNA2D3,CADM2,CADPS2,CALN1,CAMKMT,CAPN6,CARF,CASP8,CBR4,CCDC134,CCDC66,CCDC85A,CD160,CD276…	435
Diseases and Disorders	Cancer,Organismal Injury and Abnormalities,Reproductive System Disease	endometrioid endometrial cancer	Uterine endometrioid carcinoma	8.05e-22	1.06e-19	ABCA2,ABCC1,ABCC6,ABCF2,ABI2,ADAM23,ADCY2,ADSL,AFF3,AGBL4,AHCY,AKAP9,ALPK3,ANK3,AP3B2,ARHGAP26,ARHGEF33,ARL8B,ARVCF,ASB3/GPR75-ASB3,ASH1L,ASPN,ASTN2,B3GNT4,BAZ2B,BCL11A,BIRC6,BMS1,BRPF3,CACNA1D,CACNA2D3,CADPS2,CAPN6,CARF,CASP8,CCDC66,CCDC85A,CDH23,CDH7,CDHR1,CELSR3,CENPJ,CEP128,CHADL,CHRNB4,CHST5,CIBAR1,CLCA2,CLCA4,CLTCL1,CNTN6,CNTNAP2,CNTNAP4,CNTNAP5,COL4A2,COL5A1,COL6A3,COL6A6,COL8A1,CPS1,CPT1C…	353
Diseases and Disorders	Cancer,Organismal Injury and Abnormalities	endometrioid carcinoma	Endometrioid carcinoma	8.29e-22	1.08e-19	ABCA2,ABCB9,ABCC1,ABCC6,ABCF2,ABI2,ADAM23,ADCY2,ADSL,AFF3,AGBL4,AHCY,AKAP9,ALPK3,ANK3,ANKRD34C,AP3B2,ARHGAP26,ARHGEF33,ARL8B,ARVCF,ASB3/GPR75-ASB3,ASH1L,ASPN,ASTN2,B3GNT4,BAZ2B,BCL11A,BIRC6,BMS1,BRPF3,CACNA1D,CACNA2D3,CADPS2,CAPN6,CARF,CASP8,CCDC66,CCDC85A,CD47,CDH23,CDH7,CDHR1,CELSR3,CENPJ,CEP128,CHADL,CHRNB4,CHST5,CIBAR1,CLCA2,CLCA4,CLTCL1,CNTN6,CNTNAP2,CNTNAP4,CNTNAP5,COL4A2,COL5A1,COL6A3,COL6…	380
Diseases and Disorders	Cancer,Organismal Injury and Abnormalities	pelvic carcinoma	Pelvic carcinoma	1.32e-21	1.71e-19	AADAC,ABCA2,ABCB9,ABCC1,ABCC6,ABCF2,ABI2,ADAM23,ADAMTS6,ADAT1,ADCY2,ADM,ADSL,AEBP1,AFF3,AGBL4,AHCY,AKAP9,ALDH18A1,ALDH7A1,ALPK3,ANK3,ANKRD34C,AP3B2,ARHGAP26,ARHGEF3,ARHGEF33,ARL8B,ARVCF,ASB3/GPR75-ASB3,ASH1L,ASPN,ASTN2,B3GNT4,BAZ2B,BCL11A,BHLHE40,BIRC6,BMS1,BNC1,BRPF3,BST1,C10orf67,C22orf39,CACNA1D,CACNA1I,CACNA1S,CACNA2D3,CADPS2,CALN1,CAPN6,CARF,CASP8,CCDC66,CCDC71,CCDC85A,CD47,CDC45,CDH23,CDH7,…	536
Diseases and Disorders	Cancer,Organismal Injury and Abnormalities,Reproductive System Disease	breast or ovarian carcinoma	Breast or ovarian carcinoma	1.45e-21	1.87e-19	ABCA2,ABCB9,ABCF2,ABI2,ADAM23,ADAMTS6,ADCY2,AEBP1,AFF3,AGBL4,AGRN,AKAP9,ALDH18A1,ALDH7A1,ALKBH6,ALPK3,ANKRD34C,AP3B2,ARF3,ARHGEF3,ARHGEF33,ASB3/GPR75-ASB3,ASH1L,ASTN2,ATN1,ATP5IF1,BIRC6,BMS1,BNC1,BPIFB3,BRPF3,CAB39,CACNA1I,CACNA1S,CACNA2D3,CADPS2,CALN1,CAMKMT,CAPN6,CASP8,CBR4,CCDC85A,CD160,CD276,CD47,CDH23,CDHR1,CDKN1A,CDX2,CELSR3,CEP128,CEP85L,CKB,CLCA1,CLCA2,CLCA4,CLTCL1,CNTN6,CNTNAP2,CNTNAP5,C…	323
Diseases and Disorders	Cancer,Organismal Injury and Abnormalities,Reproductive System Disease	uterine cancer	Uterine cancer	1.55e-21	1.98e-19	AADAC,ABCA2,ABCC1,ABCC6,ABCF2,ABI2,ACTR3,ADAM23,ADCY2,ADM,ADSL,AFF3,AGBL4,AHCY,AKAP9,ALKBH6,ALPK3,ANK3,AP3B2,ARHGAP26,ARHGEF33,ARL8B,ARVCF,ASB3/GPR75-ASB3,ASH1L,ASPN,ASTN2,B3GNT4,BAZ2B,BCL11A,BHLHE40,BIRC6,BMS1,BNC1,BRPF3,BST1,CACNA1D,CACNA1I,CACNA2D3,CADPS2,CAPN6,CARF,CASP8,CCDC66,CCDC85A,CDH23,CDH7,CDHR1,CELSR3,CENPJ,CEP128,CHADL,CHRNA7,CHRNB4,CHST5,CIBAR1,CLCA2,CLCA4,CLDN5,CLTCL1,CNTN6,CNTNAP2…	399
Diseases and Disorders	Cancer,Organismal Injury and Abnormalities	pelvic cancer	Pelvic cancer	3.58e-21	4.52e-19	AADAC,ABCA2,ABCB9,ABCC1,ABCC6,ABCF2,ABI2,ACTR3,ADAM23,ADAMTS6,ADAT1,ADCY2,ADM,ADRM1,ADSL,AEBP1,AFF3,AGBL4,AHCY,AKAP9,ALDH18A1,ALDH7A1,ALKBH6,ALPK3,ANK3,ANKRD34C,AP3B2,ARHGAP26,ARHGEF3,ARHGEF33,ARL8B,ARVCF,ASB3/GPR75-ASB3,ASH1L,ASPN,ASTN2,B3GNT4,BAZ2B,BCL11A,BHLHE40,BIRC6,BMS1,BNC1,BRPF3,BST1,C10orf67,C22orf39,CACNA1D,CACNA1I,CACNA1S,CACNA2D3,CADPS2,CALN1,CAPN6,CARF,CASP8,CCDC66,CCDC71,CCDC85A,CD4…	558
Diseases and Disorders	Cancer,Organismal Injury and Abnormalities,Reproductive System Disease	endometrial cancer	Endometrial cancer	4.26e-21	5.34e-19	ABCA2,ABCC1,ABCC6,ABCF2,ABI2,ADAM23,ADCY2,ADM,ADSL,AFF3,AGBL4,AHCY,AKAP9,ALKBH6,ALPK3,ANK3,AP3B2,ARHGAP26,ARHGEF33,ARL8B,ARVCF,ASB3/GPR75-ASB3,ASH1L,ASPN,ASTN2,B3GNT4,BAZ2B,BCL11A,BIRC6,BMS1,BNC1,BRPF3,BST1,CACNA1D,CACNA1I,CACNA2D3,CADPS2,CAPN6,CARF,CASP8,CCDC66,CCDC85A,CDH23,CDH7,CDHR1,CELSR3,CENPJ,CEP128,CHADL,CHRNA7,CHRNB4,CHST5,CIBAR1,CLCA2,CLCA4,CLDN5,CLTCL1,CNTN6,CNTNAP2,CNTNAP4,CNTNAP5,COL…	379
Diseases and Disorders	Cancer,Organismal Injury and Abnormalities,Respiratory Disease	respiratory system tumor	Respiratory system tumor	5.61e-21	6.98e-19	AADAC,ABCA2,ABCA7,ABCB9,ABCC1,ABCF2,ABI2,ADAM23,ADAMTS6,ADCY2,ADM,ADRM1,AGBL4,AGRN,AHCY,AKAP9,ANK3,ARHGAP26,ARHGEF3,ARHGEF33,ARVCF,ASB3/GPR75-ASB3,ASH1L,ASTN2,ATN1,ATP5IF1,BCL11A,BEND4,BIRC6,BMS1,BRPF3,BST1,C2orf49,CABLES2,CACNA1D,CACNA1I,CACNA1S,CADPS2,CALN1,CAPN6,CASP8,CCDC71,CCDC85A,CD276,CDC45,CDH23,CDH7,CDHR1,CDKN1A,CDX2,CELSR3,CENPJ,CENPT,CERS5,CHRNB4,CHST5,CHST6,CIBAR1,CKB,CLCA1,CLCA2,CLCA…	391
Diseases and Disorders	Cancer,Organismal Injury and Abnormalities,Reproductive System Disease	female genital neoplasm	Female genital neoplasm	9.08e-21	1.12e-18	AADAC,ABCA2,ABCB9,ABCC1,ABCC6,ABCF2,ABI2,ACTR3,ADAM23,ADCY2,ADM,ADSL,AEBP1,AFF3,AGBL4,AHCY,AKAP9,ALDH7A1,ALKBH6,ALPK3,ANK3,ANKRD34C,AP3B2,ARHGAP26,ARHGEF33,ARL8B,ARVCF,ASB3/GPR75-ASB3,ASH1L,ASPN,ASTN2,B3GNT4,BAZ2B,BCL11A,BHLHE40,BIRC6,BMS1,BNC1,BRPF3,BST1,CACNA1D,CACNA1I,CACNA2D3,CADPS2,CAPN6,CARF,CASP8,CCDC66,CCDC85A,CD47,CDH23,CDH7,CDHR1,CDKN1A,CDX2,CELSR3,CENPJ,CEP128,CHADL,CHRNA7,CHRNB4,CHST5…	451
Diseases and Disorders	Cancer,Organismal Injury and Abnormalities	pelvic tumor	Pelvic tumor	1.09e-20	1.34e-18	AADAC,ABCA2,ABCB9,ABCC1,ABCC6,ABCF2,ABI2,ACTR3,ADAM23,ADAMTS6,ADAT1,ADCY2,ADM,ADRM1,ADSL,AEBP1,AFF3,AGBL4,AHCY,AKAP9,ALDH18A1,ALDH7A1,ALKBH6,ALPK3,ANK3,ANKRD34C,AP3B2,ARHGAP26,ARHGEF3,ARHGEF33,ARL8B,ARVCF,ASB3/GPR75-ASB3,ASH1L,ASPN,ASTN2,B3GNT4,BAZ2B,BCL11A,BHLHE40,BIRC6,BMS1,BNC1,BRPF3,BST1,C10orf67,C22orf39,CACNA1D,CACNA1I,CACNA1S,CACNA2D3,CADPS2,CALN1,CAPN6,CARF,CASP8,CCDC66,CCDC71,CCDC85A,CD4…	562
Diseases and Disorders	Developmental Disorder,Organismal Injury and Abnormalities	autism spectrum disorder or intellectual disability	Autism spectrum disorder or intellectual disability	1.22e-20	1.49e-18	ABCA2,ALDH18A1,ALDH7A1,ANK3,AP3B2,ASH1L,ASTN2,ATN1,BCL11A,BIRC6,CACNA1D,CADPS2,CD160,CDC45,CHMP1A,CLCN2,CNTN6,CNTNAP2,COA8,COL6A3,COL9A2,COMT,CPS1,CSMD1,DCC,DGCR8,DNAH3,DNAH7,DPP6,DRD2,DYNC2H1,EP300,FBN2,FHIT,FOXP1,GABRA2,GABRB3,GABRG1,GP1BB,GPR89A/GPR89B,GRIN2A,HCN1,HEXB,HGSNAT,IMPA1,KANSL1,KDM5B,KIDINS220,KMT2C,KMT2D,LINGO1,LIX1L,LOC102724788/PRODH,LZTR1,MGST1,MYT1L,NINL,NIPA1,NIPBL,NLGN3,NLGN4…	116
Diseases and Disorders	Cancer,Organismal Injury and Abnormalities,Respiratory Disease	malignant neoplasm of respiratory system	Malignant neoplasm of respiratory system	1.3e-20	1.56e-18	AADAC,ABCA2,ABCA7,ABCB9,ABCC1,ABCF2,ABI2,ADAM23,ADAMTS6,ADCY2,ADM,ADRM1,AGBL4,AGRN,AHCY,AKAP9,ANK3,ARHGAP26,ARHGEF3,ARHGEF33,ARVCF,ASB3/GPR75-ASB3,ASH1L,ASTN2,ATN1,ATP5IF1,BCL11A,BEND4,BIRC6,BMS1,BRPF3,BST1,C2orf49,CABLES2,CACNA1D,CACNA1I,CACNA1S,CADPS2,CALN1,CAPN6,CASP8,CCDC71,CCDC85A,CDC45,CDH23,CDH7,CDHR1,CDKN1A,CDX2,CELSR3,CENPJ,CENPT,CHRNB4,CHST5,CHST6,CIBAR1,CKB,CLCA1,CLCA2,CLCA4,CLCN2,CNTN…	387
Diseases and Disorders	Cancer,Organismal Injury and Abnormalities,Reproductive System Disease	tumorigenesis	Tumorigenesis of reproductive tract	1.3e-20	1.56e-18	AADAC,ABCA2,ABCB9,ABCC1,ABCC6,ABCF2,ABI2,ACTR3,ADAM23,ADCY2,ADM,ADSL,AEBP1,AFF3,AGBL4,AHCY,AKAP9,ALDH7A1,ALKBH6,ALPK3,ANK3,ANKRD34C,AP3B2,ARHGAP26,ARHGEF33,ARL8B,ARVCF,ASB3/GPR75-ASB3,ASH1L,ASPN,ASTN2,B3GNT4,BAZ2B,BCL11A,BHLHE40,BIRC6,BMS1,BNC1,BRPF3,BST1,CACNA1D,CACNA1I,CACNA2D3,CADPS2,CAPN6,CARF,CASP8,CCDC66,CCDC85A,CD47,CDH23,CDH7,CDHR1,CDKN1A,CDX2,CELSR3,CENPJ,CEP128,CHADL,CHRNA7,CHRNB4,CHST5…	450
Diseases and Disorders	Cancer,Endocrine System Disorders,Organismal Injury and Abnormalities,Respiratory Disease	neuroendocrine lung tumor	Neuroendocrine lung tumor	1.38e-20	1.64e-18	AADAC,ABCA2,ABCB9,ABCC1,ABCF2,ABI2,ADAM23,ADAMTS6,ADRM1,AGBL4,AHCY,ARHGEF33,ARVCF,ASB3/GPR75-ASB3,ASTN2,BCL11A,BIRC6,BMS1,BST1,CACNA1I,CACNA1S,CAPN6,CCDC85A,CDH7,CDKN1A,CENPT,CHST5,CKB,CLCA1,CLCA4,CNTNAP2,CNTNAP4,CNTNAP5,COL4A2,COL5A1,COL9A2,CPNE5,CPS1,CSMD1,CSMD3,CTNNA3,DAGLA,DBN1,DCAF4L1,DCC,DLC1,DLX6,DNAH11,DNAH3,DNAH5,DNAJC13,DYNC2H1,DYSF,EDC4,EEF2,EGFR,EP300,EPB41,EPHB2,ERCC5,ETS1,FAM153A/FA…	220
Diseases and Disorders	Cancer,Endocrine System Disorders,Organismal Injury and Abnormalities	thoracic neuroendocrine neoplasm	Thoracic neuroendocrine neoplasm	1.49e-20	1.76e-18	AADAC,ABCA2,ABCB9,ABCC1,ABCF2,ABI2,ADAM23,ADAMTS6,ADRM1,AGBL4,AHCY,ARHGEF33,ARVCF,ASB3/GPR75-ASB3,ASTN2,BCL11A,BIRC6,BMS1,BST1,CACNA1I,CACNA1S,CAPN6,CCDC85A,CDH7,CDKN1A,CENPT,CHST5,CKB,CLCA1,CLCA4,CNTNAP2,CNTNAP4,CNTNAP5,COL4A2,COL5A1,COL9A2,CPNE5,CPS1,CSMD1,CSMD3,CTNNA3,DAGLA,DBN1,DCAF4L1,DCC,DLC1,DLX6,DNAH11,DNAH3,DNAH5,DNAJC13,DYNC2H1,DYSF,EDC4,EEF2,EGFR,EP300,EPB41,EPHB2,ERCC5,ETS1,FAM153A/FA…	220
Diseases and Disorders	Cancer,Organismal Injury and Abnormalities	cancer of head	Cancer of head	1.69e-20	1.99e-18	AADAC,ABCA2,ABCA7,ABCC1,ABCG8,ACTR8,ADAM23,ADAMTS6,ADCY2,ADM,ADSL,AIFM3,AKAP9,ALDH18A1,ANK3,ARF3,ARHGAP26,ARL8B,ARVCF,ASH1L,ASPN,ASTN2,ATN1,B3GNT4,BAG5,BAZ2B,BBX,BCL11A,BHLHE40,BIRC6,BMS1,BNC1,BRPF3,BST1,C10orf67,CACNA1D,CADPS2,CAMK1D,CASP8,CCDC134,CCDC71,CCDC85A,CD276,CD302,CDC45,CDH23,CDK2AP1,CDKN1A,CELSR3,CEP128,CEP85L,CHDH,CHST5,CKB,CLCA1,CLTCL1,CNTNAP2,COL4A2,COL5A1,CSDC2,CSMD1,CSMD3,CXCL14,…	305
Diseases and Disorders	Cancer,Organismal Injury and Abnormalities,Reproductive System Disease	female genital tract cancer	Female genital tract cancer	1.84e-20	2.14e-18	AADAC,ABCA2,ABCB9,ABCC1,ABCC6,ABCF2,ABI2,ACTR3,ADAM23,ADCY2,ADM,ADSL,AEBP1,AFF3,AGBL4,AHCY,AKAP9,ALDH7A1,ALKBH6,ALPK3,ANK3,ANKRD34C,AP3B2,ARHGAP26,ARHGEF33,ARL8B,ARVCF,ASB3/GPR75-ASB3,ASH1L,ASPN,ASTN2,B3GNT4,BAZ2B,BCL11A,BHLHE40,BIRC6,BMS1,BNC1,BRPF3,BST1,CACNA1D,CACNA1I,CACNA2D3,CADPS2,CAPN6,CARF,CASP8,CCDC66,CCDC85A,CD47,CDH23,CDH7,CDHR1,CDKN1A,CDX2,CELSR3,CENPJ,CEP128,CHADL,CHRNA7,CHRNB4,CHST5…	442
Diseases and Disorders	Organismal Injury and Abnormalities,Reproductive System Disease	abnormality of endometrium	Abnormality of endometrium	1.95e-20	2.25e-18	ABCA2,ABCC1,ABCC6,ABCF2,ABI2,ADAM23,ADCY2,ADM,ADSL,AFF3,AGBL4,AGRN,AHCY,AKAP9,ALKBH6,ALPK3,ANK3,AP3B2,ARHGAP26,ARHGEF33,ARL8B,ARVCF,ASB3/GPR75-ASB3,ASH1L,ASPN,ASTN2,B3GNT4,BAZ2B,BCL11A,BIRC6,BMS1,BNC1,BRPF3,BST1,CACNA1D,CACNA1I,CACNA2D3,CADPS2,CAPN6,CARF,CASP8,CCDC66,CCDC85A,CDC45,CDH23,CDH7,CDHR1,CELSR3,CENPJ,CEP128,CHADL,CHRNA7,CHRNB4,CHST5,CIBAR1,CLCA2,CLCA4,CLDN5,CLTCL1,CNTN6,CNTNAP2,CNTNAP4,…	386
Diseases and Disorders	Cancer,Organismal Injury and Abnormalities	blue round small cell tumor	Blue round small cell tumor	2.06e-20	2.36e-18	AADAC,ABCA2,ABCB9,ABCC1,ABCF2,ABI2,ADAM23,ADAMTS6,ADRM1,AGBL4,AGRN,AHCY,ANK3,ARHGEF33,ARVCF,ASB3/GPR75-ASB3,ASPN,ASTN2,BCL11A,BIRC6,BMS1,BST1,CACNA1I,CACNA1S,CACNA2D3,CADPS2,CAPN6,CARF,CASP8,CCDC85A,CD276,CDH7,CDKN1A,CDX2,CENPT,CEP128,CHST5,CKB,CLCA1,CLCA4,CNTN6,CNTNAP2,CNTNAP4,CNTNAP5,COL4A2,COL5A1,COL6A3,COL9A2,CPNE5,CPS1,CRKL,CSMD1,CSMD3,CTNNA3,DAGLA,DBN1,DCAF4L1,DCC,DLC1,DLEC1,DLX6,DNAH11,DNA…	266
Diseases and Disorders	Cancer,Endocrine System Disorders,Organismal Injury and Abnormalities,Respiratory Disease	neuroendocrine lung cancer	Neuroendocrine lung cancer	2.29e-20	2.61e-18	AADAC,ABCA2,ABCB9,ABCC1,ABCF2,ABI2,ADAM23,ADAMTS6,ADRM1,AGBL4,AHCY,ARHGEF33,ARVCF,ASB3/GPR75-ASB3,ASTN2,BCL11A,BIRC6,BMS1,BST1,CACNA1I,CACNA1S,CAPN6,CCDC85A,CDH7,CDKN1A,CENPT,CHST5,CKB,CLCA1,CLCA4,CNTNAP2,CNTNAP4,CNTNAP5,COL4A2,COL5A1,COL9A2,CPNE5,CPS1,CSMD1,CSMD3,CTNNA3,DAGLA,DBN1,DCAF4L1,DCC,DLC1,DLX6,DNAH11,DNAH3,DNAH5,DNAJC13,DYNC2H1,DYSF,EDC4,EEF2,EGFR,EP300,EPB41,EPHB2,ERCC5,ETS1,FAM153A/FA…	219
Diseases and Disorders	Cancer,Organismal Injury and Abnormalities,Reproductive System Disease	female genital carcinoma	Female genital carcinoma	2.62e-20	2.96e-18	AADAC,ABCA2,ABCB9,ABCC1,ABCC6,ABCF2,ABI2,ADAM23,ADCY2,ADM,ADSL,AEBP1,AFF3,AGBL4,AHCY,AKAP9,ALDH7A1,ALPK3,ANK3,ANKRD34C,AP3B2,ARHGAP26,ARHGEF33,ARL8B,ARVCF,ASB3/GPR75-ASB3,ASH1L,ASPN,ASTN2,B3GNT4,BAZ2B,BCL11A,BIRC6,BMS1,BNC1,BRPF3,BST1,CACNA1D,CACNA2D3,CADPS2,CAPN6,CARF,CASP8,CCDC66,CCDC85A,CD47,CDH23,CDH7,CDHR1,CDKN1A,CDX2,CELSR3,CENPJ,CEP128,CHADL,CHRNB4,CHST5,CIBAR1,CLCA1,CLCA2,CLCA4,CLDN5,CLTC…	418
Diseases and Disorders	Cancer,Endocrine System Disorders,Organismal Injury and Abnormalities,Respiratory Disease	small cell lung cancer	Small cell lung carcinoma	3.39e-20	3.79e-18	AADAC,ABCA2,ABCB9,ABCC1,ABCF2,ABI2,ADAM23,ADAMTS6,ADRM1,AGBL4,AHCY,ARHGEF33,ARVCF,ASB3/GPR75-ASB3,ASTN2,BCL11A,BIRC6,BMS1,BST1,CACNA1I,CACNA1S,CAPN6,CCDC85A,CDH7,CDKN1A,CENPT,CHST5,CKB,CLCA1,CLCA4,CNTNAP2,CNTNAP4,CNTNAP5,COL4A2,COL5A1,COL9A2,CPNE5,CPS1,CSMD1,CSMD3,CTNNA3,DAGLA,DBN1,DCAF4L1,DCC,DLC1,DLX6,DNAH11,DNAH3,DNAH5,DNAJC13,DYNC2H1,DYSF,EDC4,EEF2,EGFR,EP300,EPB41,EPHB2,ERCC5,ETS1,FAM153A/FA…	218
Diseases and Disorders	Cancer,Endocrine System Disorders,Organismal Injury and Abnormalities	small-cell carcinoma	Small-cell carcinoma	3.4e-20	3.79e-18	AADAC,ABCA2,ABCB9,ABCC1,ABCF2,ABI2,ADAM23,ADAMTS6,ADRM1,AGBL4,AHCY,ANK3,ARHGEF33,ARVCF,ASB3/GPR75-ASB3,ASPN,ASTN2,BCL11A,BIRC6,BMS1,BST1,CACNA1I,CACNA1S,CACNA2D3,CADPS2,CAPN6,CARF,CCDC85A,CDH7,CDKN1A,CDX2,CENPT,CEP128,CHST5,CKB,CLCA1,CLCA4,CNTNAP2,CNTNAP4,CNTNAP5,COL4A2,COL5A1,COL6A3,COL9A2,CPNE5,CPS1,CSMD1,CSMD3,CTNNA3,DAGLA,DBN1,DCAF4L1,DCC,DLC1,DLX6,DNAH11,DNAH3,DNAH5,DNAJC13,DOP1B,DYNC2H1,DYS…	245
Diseases and Disorders	Developmental Disorder,Organismal Injury and Abnormalities	autism or intellectual disability	Autism or intellectual disability	4.3e-20	4.76e-18	ABCA2,ALDH18A1,ALDH7A1,ANK3,ASH1L,ASTN2,ATN1,BCL11A,CACNA1D,CADPS2,CD160,CDC45,CHMP1A,CLCN2,CNTN6,CNTNAP2,COA8,COL6A3,COL9A2,COMT,CPS1,CSMD1,DCC,DGCR8,DNAH3,DNAH7,DPP6,DRD2,DYNC2H1,EP300,FBN2,FHIT,FOXP1,GABRA2,GABRB3,GABRG1,GP1BB,GPR89A/GPR89B,GRIN2A,HCN1,HEXB,HGSNAT,IMPA1,KANSL1,KDM5B,KIDINS220,KMT2C,KMT2D,LINGO1,LIX1L,LOC102724788/PRODH,MYT1L,NINL,NIPA1,NIPBL,NLGN3,NLGN4X,NOTCH2NLA/NOTCH2NLB,NR…	105
Diseases and Disorders	Cancer,Endocrine System Disorders,Organismal Injury and Abnormalities	neuroendocrine carcinoma	Neuroendocrine carcinoma	4.53e-20	4.98e-18	AADAC,ABCA2,ABCB9,ABCC1,ABCF2,ABI2,ADAM23,ADAMTS6,ADRM1,AGBL4,AHCY,ANK3,ARHGEF33,ARVCF,ASB3/GPR75-ASB3,ASPN,ASTN2,BCL11A,BIRC6,BMS1,BST1,CACNA1I,CACNA1S,CACNA2D3,CADPS2,CAPN6,CARF,CCDC85A,CDH7,CDKN1A,CDX2,CENPT,CEP128,CHST5,CKB,CLCA1,CLCA4,CNTNAP2,CNTNAP4,CNTNAP5,COL4A2,COL5A1,COL6A3,COL9A2,CPNE5,CPS1,CSMD1,CSMD3,CTNNA3,DAGLA,DBN1,DCAF4L1,DCC,DLC1,DLX6,DNAH11,DNAH3,DNAH5,DNAJC13,DOP1B,DYNC2H1,DYS…	246
Diseases and Disorders	Cancer,Dermatological Diseases and Conditions,Organismal Injury and Abnormalities	skin carcinoma	Skin carcinoma	5.8e-20	6.34e-18	AADAC,ABCA2,ABCB9,ABCC1,ADAMTS6,ADAT1,AFF3,AGBL4,AGRN,AKAP9,ALPK3,ANK3,ANKRD34C,AP3B2,ARHGAP26,ARHGEF3,ARIH2OS,ASB3/GPR75-ASB3,ATN1,BAG5,BBX,BCL11A,BEND4,BIRC6,BMS1,BRPF3,CACNA1D,CACNA1I,CACNA1S,CADM2,CADPS2,CALN1,CAMKMT,CASP8,CCDC134,CDC45,CDH23,CDH7,CDHR1,CDKN1A,CELSR3,CHDH,CHGB,CHRNA7,CHST5,CHST6,CIBAR1,CLCA2,CLTCL1,CNTN6,CNTNAP2,CNTNAP4,CNTNAP5,COL4A2,COL6A3,COL6A6,COL8A1,COL9A2,COP1,CORO7/CO…	290
Diseases and Disorders	Cancer,Organismal Injury and Abnormalities,Reproductive System Disease	uterine carcinoma	Uterine carcinoma	6.86e-20	7.44e-18	AADAC,ABCA2,ABCC1,ABCC6,ABCF2,ABI2,ADAM23,ADCY2,ADM,ADSL,AFF3,AGBL4,AHCY,AKAP9,ALPK3,ANK3,AP3B2,ARHGAP26,ARHGEF33,ARL8B,ARVCF,ASB3/GPR75-ASB3,ASH1L,ASPN,ASTN2,B3GNT4,BAZ2B,BCL11A,BIRC6,BMS1,BRPF3,BST1,CACNA1D,CACNA2D3,CADPS2,CAPN6,CARF,CASP8,CCDC66,CCDC85A,CDH23,CDH7,CDHR1,CELSR3,CENPJ,CEP128,CHADL,CHRNB4,CHST5,CIBAR1,CLCA2,CLCA4,CLDN5,CLTCL1,CNTN6,CNTNAP2,CNTNAP4,CNTNAP5,COL4A2,COL5A1,COL6A3,COL…	372
Diseases and Disorders	Cancer,Dermatological Diseases and Conditions,Organismal Injury and Abnormalities	skin basal cell carcinoma	Basal cell carcinoma	7.62e-20	8.21e-18	AADAC,ABCB9,ABCC1,ADAMTS6,ADAT1,AFF3,AGBL4,AGRN,AKAP9,ALPK3,AP3B2,ARHGAP26,ARHGEF3,ARIH2OS,ASB3/GPR75-ASB3,ATN1,BAG5,BBX,BCL11A,BEND4,BIRC6,BMS1,BRPF3,CACNA1D,CACNA1I,CACNA1S,CADM2,CADPS2,CALN1,CAMKMT,CASP8,CCDC134,CDC45,CDH23,CDH7,CDHR1,CDKN1A,CELSR3,CHDH,CHGB,CHRNA7,CHST5,CHST6,CIBAR1,CLCA2,CLTCL1,CNTN6,CNTNAP2,CNTNAP4,CNTNAP5,COL4A2,COL6A3,COL6A6,COL8A1,COL9A2,COP1,CORO7/CORO7-PAM16,CPEB1,CPS1…	264
Diseases and Disorders	Cancer,Organismal Injury and Abnormalities	malignant neoplasm of retroperitoneum	Malignant neoplasm of retroperitoneum	9.06e-20	9.7e-18	ABCA7,ABCB9,ABCG8,ACTR3,ADAM23,ADAMTS6,ADCY2,ADM,ADSL,AGRN,AKAP9,ALDH7A1,AP3B2,ARHGAP26,ARHGEF33,ASB3/GPR75-ASB3,ATP5IF1,BAZ2B,BHLHE40,BIRC6,BMS1,BPIFB3,BRPF3,BST1,C10orf67,CACNA1D,CACNA1I,CACNA1S,CADM2,CAPN6,CARF,CCDC134,CCDC66,CCDC85A,CD276,CDH23,CDH7,CDKN1A,CELSR3,CENPJ,CHST6,CIBAR1,CLCA1,CLCA4,CLCN2,CLTCL1,CNTN6,CNTNAP2,CNTNAP4,COL4A2,COL5A1,COL6A3,COL6A6,COL8A1,CORO7/CORO7-PAM16,CPEB1,CPT1C,…	306
Diseases and Disorders	Cancer,Organismal Injury and Abnormalities	ductal carcinoma	Ductal carcinoma	1.23e-19	1.31e-17	ABCA7,ACTR3,ADAM23,ADAMTS6,ADCY2,ADSL,AGBL4,AGRN,AKAP9,ALDH7A1,ALPK3,ANK3,AP3B2,ARHGEF33,ASB3/GPR75-ASB3,ASH1L,ATP5IF1,B3GNT4,BAZ2B,BIRC6,BMS1,BPIFB3,BRPF3,BST1,C10orf67,CAB39,CACNA1D,CACNA1I,CACNA1S,CADM2,CAPN6,CARF,CASP8,CBR4,CCDC134,CCDC66,CCDC85A,CDH7,CDKN1A,CDX2,CELSR3,CENPJ,CHST6,CIBAR1,CLCA4,CLTCL1,CNTN6,CNTNAP2,CNTNAP4,COL4A2,COL5A1,COL6A3,COL6A6,COL8A1,CPEB1,CPT1C,CRHR1,CSMD1,CSMD3,CTNNA…	288
Diseases and Disorders	Cancer,Organismal Injury and Abnormalities,Reproductive System Disease	prostatic carcinoma	Prostatic carcinoma	1.77e-19	1.87e-17	ABCB9,ABCC1,ADAMTS6,ADAT1,ADCY2,ADSL,AEBP1,AKAP9,ALDH18A1,ALDH7A1,ALPK3,ANK3,AP3B2,ARHGEF3,ARVCF,ASH1L,ASPN,ASTN2,B3GNT4,BAZ2B,BCL11A,BHLHE40,BIRC6,BNC1,C10orf67,C22orf39,CACNA1S,CADPS2,CALN1,CARF,CASP8,CCDC85A,CDC45,CDH23,CDH7,CDKN1A,CELSR3,CENPT,CKB,CLCA4,CLTCL1,CNTN6,CNTNAP2,CNTNAP4,CNTNAP5,COL4A2,COL6A3,COL6A6,COL8A1,COP1,CPEB1,CPNE5,CPS1,CSDC2,CSMD1,CSMD3,CTNNA3,DCAF1,DCC,DGKQ,DLC1,DLEC1,DNA…	291
Diseases and Disorders	Cancer,Gastrointestinal Disease,Organismal Injury and Abnormalities	gastroesophageal adenocarcinoma	Gastroesophageal adenocarcinoma	3.46e-19	3.63e-17	AADAC,ABCA2,ABCB9,ABCC1,ACAA1,ADCY2,AFF3,AGBL4,AGRN,AKAP9,ALDH18A1,ANK3,ARHGAP26,ASH1L,ASPN,ASTN2,ATN1,BCL11A,BNC1,BPIFB3,BST1,CACNA1D,CACNA2D3,CD47,CELSR3,CENPJ,CHDH,CHGB,CHRNA7,CHRNB4,CKB,CNTN6,CNTNAP2,CNTNAP4,CNTNAP5,COL5A1,COL6A3,COL8A1,CORO7/CORO7-PAM16,CPS1,CRHR1,CSMD1,CSMD3,DCC,DHX57,DIO2,DLC1,DNAH3,DNAH5,DNAH7,DPP6,DYSF,EEF2,EGFR,EP300,EPSTI1,ERCC5,ERRFI1,ESR1,FAXC,FBN2,FBN3,FIP1L1,FLG,FL…	235
Diseases and Disorders	Cancer,Organismal Injury and Abnormalities,Reproductive System Disease	prostatic adenocarcinoma	Prostatic adenocarcinoma	4.95e-19	5.16e-17	ABCB9,ABCC1,ADAMTS6,ADAT1,ADCY2,ADSL,AEBP1,ALDH18A1,ALPK3,ANK3,AP3B2,ARHGEF3,ARVCF,ASH1L,ASPN,ASTN2,B3GNT4,BAZ2B,BCL11A,BHLHE40,BIRC6,BNC1,C10orf67,C22orf39,CACNA1S,CADPS2,CALN1,CARF,CASP8,CCDC85A,CDC45,CDH23,CDH7,CDKN1A,CELSR3,CENPT,CLCA4,CLTCL1,CNTN6,CNTNAP2,CNTNAP4,CNTNAP5,COL4A2,COL6A3,COL6A6,COL8A1,COP1,CPEB1,CPNE5,CPS1,CSDC2,CSMD1,CSMD3,CTNNA3,DCAF1,DCC,DLC1,DLEC1,DNAH1,DNAH11,DNAH3,DNAH5,D…	279
Diseases and Disorders	Cancer,Organismal Injury and Abnormalities	neoplasia	Neoplasia of cells	7.07e-19	7.32e-17	AADAC,ABCA2,ABCA7,ABCB9,ABCC1,ABCC6,ABCG8,ACO2,ADAMTS6,ADCY2,ADSL,AFF3,AGBL4,AGRN,AIFM3,AKAP9,ALDH7A1,ALPK3,ANK3,ANKRD34C,ARHGAP26,ARHGEF3,ARHGEF33,ARVCF,ASB3/GPR75-ASB3,ASH1L,ASPN,ASTN2,ATN1,BAZ2B,BBX,BCL11A,BCL7A,BIRC6,BMS1,BRPF3,BST1,CACNA1D,CACNA1I,CACNA1S,CADM2,CADPS2,CALN1,CARF,CASP8,CCDC134,CCDC66,CCDC85A,CCDC92,CD160,CD276,CD47,CDC45,CDH23,CDH7,CDHR1,CDK2AP1,CDKN1A,CDX2,CELSR3,CENPJ,CENPT…	465
Diseases and Disorders	Cancer,Endocrine System Disorders,Organismal Injury and Abnormalities	neuroendocrine tumor	Neuroendocrine tumor	7.49e-19	7.71e-17	AADAC,ABCA2,ABCB9,ABCC1,ABCF2,ABI2,ADAM23,ADAMTS6,ADCY2,ADRM1,AEBP1,AFF3,AGBL4,AHCY,ANK3,ARHGEF33,ARVCF,ASB3/GPR75-ASB3,ASPN,ASTN2,BCL11A,BEND4,BIRC6,BMS1,BST1,CACNA1I,CACNA1S,CACNA2D3,CADPS2,CAPN6,CARF,CCDC85A,CD276,CDH23,CDH7,CDKN1A,CDX2,CELSR3,CENPT,CEP128,CHDH,CHST5,CKB,CLCA1,CLCA4,CNTNAP2,CNTNAP4,CNTNAP5,COL4A2,COL5A1,COL6A3,COL6A6,COL9A2,CPNE5,CPS1,CSMD1,CSMD3,CTNNA3,DAGLA,DBN1,DCAF4L1,DCC,…	268
Diseases and Disorders	Cancer,Organismal Injury and Abnormalities,Respiratory Disease	lung tumor	Lung tumor	9.13e-19	9.33e-17	AADAC,ABCA2,ABCB9,ABCC1,ABCF2,ABI2,ADAM23,ADAMTS6,ADCY2,ADM,ADRM1,AGBL4,AGRN,AHCY,AKAP9,ARHGEF33,ARVCF,ASB3/GPR75-ASB3,ASH1L,ASTN2,ATN1,ATP5IF1,BCL11A,BEND4,BIRC6,BMS1,BST1,C2orf49,CACNA1D,CACNA1I,CACNA1S,CADPS2,CALN1,CAPN6,CASP8,CCDC71,CCDC85A,CD276,CDC45,CDH23,CDH7,CDHR1,CDKN1A,CENPJ,CENPT,CERS5,CHRNB4,CHST5,CHST6,CIBAR1,CKB,CLCA1,CLCA2,CLCA4,CLCN2,CNTNAP2,CNTNAP4,CNTNAP5,COL4A2,COL5A1,COL6A3,C…	356
Diseases and Disorders	Cancer,Organismal Injury and Abnormalities,Respiratory Disease	carcinoma	Lung carcinoma	9.71e-19	9.87e-17	AADAC,ABCA2,ABCB9,ABCC1,ABCF2,ABI2,ADAM23,ADAMTS6,ADCY2,ADRM1,AGBL4,AGRN,AHCY,AKAP9,ARHGEF33,ARVCF,ASB3/GPR75-ASB3,ASH1L,ASTN2,ATN1,ATP5IF1,BCL11A,BEND4,BIRC6,BMS1,BST1,C2orf49,CACNA1D,CACNA1I,CACNA1S,CADPS2,CALN1,CAPN6,CASP8,CCDC71,CCDC85A,CDC45,CDH23,CDH7,CDHR1,CDKN1A,CENPJ,CENPT,CHRNB4,CHST5,CHST6,CIBAR1,CKB,CLCA1,CLCA2,CLCA4,CLCN2,CNTNAP2,CNTNAP4,CNTNAP5,COL4A2,COL5A1,COL6A3,COL8A1,COL9A2,COR…	342
Diseases and Disorders	Cancer,Endocrine System Disorders,Organismal Injury and Abnormalities	extrapancreatic neuroendocrine tumor	Extrapancreatic neuroendocrine tumor	9.88e-19	9.98e-17	AADAC,ABCA2,ABCB9,ABCC1,ABCF2,ABI2,ADAM23,ADAMTS6,ADCY2,ADRM1,AEBP1,AFF3,AGBL4,AHCY,ARHGEF33,ARVCF,ASB3/GPR75-ASB3,ASTN2,BCL11A,BEND4,BIRC6,BMS1,BST1,CACNA1I,CACNA1S,CACNA2D3,CADPS2,CAPN6,CARF,CCDC85A,CD276,CDH23,CDH7,CDKN1A,CELSR3,CENPT,CEP128,CHDH,CHST5,CKB,CLCA1,CLCA4,CNTNAP2,CNTNAP4,CNTNAP5,COL4A2,COL5A1,COL6A3,COL6A6,COL9A2,CPNE5,CPS1,CSMD1,CSMD3,CTNNA3,DAGLA,DBN1,DCAF4L1,DCC,DLC1,DLX6,DNAH1…	262
Diseases and Disorders	Cancer,Organismal Injury and Abnormalities	thoracic neoplasm	Thoracic neoplasm	1.18e-18	1.18e-16	AADAC,ABCA2,ABCB9,ABCC1,ABCF2,ABI2,ADAM23,ADAMTS6,ADCY2,ADM,ADRM1,AGBL4,AGRN,AHCY,AKAP9,ARHGEF33,ARVCF,ASB3/GPR75-ASB3,ASH1L,ASTN2,ATN1,ATP5IF1,BCL11A,BEND4,BIRC6,BMS1,BST1,C2orf49,CACNA1D,CACNA1I,CACNA1S,CADPS2,CALN1,CAPN6,CASP8,CCDC71,CCDC85A,CD276,CDC45,CDH23,CDH7,CDHR1,CDKN1A,CENPJ,CENPT,CERS5,CHRNB4,CHST5,CHST6,CIBAR1,CKB,CLCA1,CLCA2,CLCA4,CLCN2,CNTNAP2,CNTNAP4,CNTNAP5,COL4A2,COL5A1,COL6A3,C…	357
Diseases and Disorders	Cancer,Organismal Injury and Abnormalities,Reproductive System Disease	breast or ovarian cancer	Breast or ovarian cancer	1.19e-18	1.18e-16	ABCA2,ABCB9,ABCC1,ABCF2,ABI2,ACAA1,ADAM23,ADAMTS6,ADCY2,ADRM1,AEBP1,AFF3,AGBL4,AGRN,AKAP9,ALDH18A1,ALDH7A1,ALKBH6,ALPK3,ANKRD34C,AP3B2,ARF3,ARHGEF3,ARHGEF33,ASB3/GPR75-ASB3,ASH1L,ASTN2,ATN1,ATP5IF1,BHLHE40,BIRC6,BMS1,BNC1,BPIFB3,BRPF3,CAB39,CACNA1I,CACNA1S,CACNA2D3,CADPS2,CALN1,CAMKMT,CAPN6,CASP8,CBR4,CCDC85A,CD160,CD276,CD47,CDH23,CDHR1,CDKN1A,CDX2,CELSR3,CEP128,CEP85L,CKB,CLCA1,CLCA2,CLCA4,CLTC…	352
Diseases and Disorders	Cancer,Gastrointestinal Disease,Organismal Injury and Abnormalities	pancreaticobiliary carcinoma	Pancreaticobiliary carcinoma	1.19e-18	1.18e-16	ABCA7,ABCG8,ACTR3,ADAM23,ADAMTS6,ADSL,AGBL4,AGRN,AKAP9,ALDH7A1,ANK3,AP3B2,ARHGEF33,ASB3/GPR75-ASB3,ASPN,ATN1,B3GNT4,BAZ2B,BIRC6,BMS1,BPIFB3,BRPF3,BST1,C10orf67,CACNA1D,CACNA1I,CADM2,CAPN6,CARF,CCDC134,CCDC66,CCDC85A,CDH7,CDKN1A,CDX2,CELSR3,CENPJ,CHDH,CHST6,CIBAR1,CLCA1,CLCA4,CLTCL1,CNTN6,CNTNAP2,CNTNAP4,COL4A2,COL5A1,COL6A3,COL6A6,COL8A1,CPEB1,CPT1C,CRHR1,CSMD1,CSMD3,CTNNA3,CTRL,CXCL14,CXXC4,DCAF…	270
Diseases and Disorders	Cancer,Organismal Injury and Abnormalities,Reproductive System Disease	male genital neoplasm	Male genital neoplasm	1.58e-18	1.56e-16	ABCB9,ABCC1,ADAMTS6,ADAT1,ADCY2,ADRM1,ADSL,AEBP1,AKAP9,ALDH18A1,ALDH7A1,ALPK3,AMH,ANK3,AP3B2,ARHGEF3,ARVCF,ASH1L,ASPN,ASTN2,B3GNT4,BAZ2B,BCL11A,BHLHE40,BIRC6,BNC1,C10orf67,C22orf39,CACNA1D,CACNA1S,CADPS2,CALN1,CAPN6,CARF,CASP8,CCDC85A,CDC45,CDH23,CDH7,CDKN1A,CELSR3,CENPT,CHGB,CKB,CLCA4,CLTCL1,CNTN6,CNTNAP2,CNTNAP4,CNTNAP5,COL4A2,COL5A1,COL6A3,COL6A6,COL8A1,COP1,CPEB1,CPNE5,CPS1,CSDC2,CSMD1,CSMD3,…	325
Diseases and Disorders	Cancer,Gastrointestinal Disease,Organismal Injury and Abnormalities	pancreaticobiliary cancer	Pancreaticobiliary cancer	2.23e-18	2.18e-16	ABCA7,ABCG8,ACTR3,ADAM23,ADAMTS6,ADSL,AGBL4,AGRN,AKAP9,ALDH7A1,ANK3,AP3B2,ARHGEF33,ASB3/GPR75-ASB3,ASPN,ATN1,B3GNT4,BAZ2B,BIRC6,BMS1,BPIFB3,BRPF3,BST1,C10orf67,CACNA1D,CACNA1I,CADM2,CAPN6,CARF,CCDC134,CCDC66,CCDC85A,CDH7,CDKN1A,CDX2,CELSR3,CENPJ,CHDH,CHST6,CIBAR1,CLCA1,CLCA4,CLTCL1,CNTN6,CNTNAP2,CNTNAP4,COL4A2,COL5A1,COL6A3,COL6A6,COL8A1,CPEB1,CPT1C,CRHR1,CSMD1,CSMD3,CTNNA3,CTRL,CXCL14,CXXC4,DCAF…	277
Diseases and Disorders	Cancer,Gastrointestinal Disease,Organismal Injury and Abnormalities	gastric adenocarcinoma	Gastric adenocarcinoma	2.45e-18	2.38e-16	AADAC,ABCA2,ABCB9,ABCC1,ACAA1,ADCY2,AFF3,AGBL4,AGRN,AKAP9,ALDH18A1,ANK3,ARHGAP26,ASH1L,ASPN,ATN1,BCL11A,BNC1,BPIFB3,CACNA1D,CACNA2D3,CD47,CELSR3,CENPJ,CHDH,CHGB,CHRNB4,CKB,CNTNAP2,CNTNAP4,CNTNAP5,COL5A1,COL6A3,CORO7/CORO7-PAM16,CPS1,CRHR1,CSMD1,CSMD3,DCC,DHX57,DLC1,DNAH3,DNAH5,DNAH7,DPP6,DYSF,EEF2,EGFR,EP300,EPSTI1,ERCC5,ERRFI1,ESR1,FAXC,FBN3,FIP1L1,FLG,FLT3,FN1,FOXP1,GABRB3,GABRG1,GEM,GNB1L,GPR1…	213
Diseases and Disorders	Cancer,Organismal Injury and Abnormalities,Reproductive System Disease	malignant neoplasm of male genital organ	Malignant neoplasm of male genital organ	2.92e-18	2.82e-16	ABCB9,ABCC1,ADAMTS6,ADAT1,ADCY2,ADRM1,ADSL,AEBP1,AKAP9,ALDH18A1,ALDH7A1,ALPK3,ANK3,AP3B2,ARHGEF3,ARVCF,ASH1L,ASPN,ASTN2,B3GNT4,BAZ2B,BCL11A,BHLHE40,BIRC6,BNC1,C10orf67,C22orf39,CACNA1D,CACNA1S,CADPS2,CALN1,CAPN6,CARF,CASP8,CCDC85A,CDC45,CDH23,CDH7,CDKN1A,CELSR3,CENPT,CHGB,CKB,CLCA4,CLTCL1,CNTN6,CNTNAP2,CNTNAP4,CNTNAP5,COL4A2,COL5A1,COL6A3,COL6A6,COL8A1,COP1,CPEB1,CPNE5,CPS1,CSDC2,CSMD1,CSMD3,CTNN…	321
Diseases and Disorders	Cancer,Organismal Injury and Abnormalities	extraadrenal retroperitoneal tumor	Extraadrenal retroperitoneal tumor	3.25e-18	3.12e-16	ABCA7,ABCB9,ABCG8,ACTR3,ADAM23,ADAMTS6,ADCY2,ADM,ADSL,AFF3,AGRN,AKAP9,ALDH7A1,AP3B2,ARHGAP26,ARHGEF33,ASB3/GPR75-ASB3,ASPN,ATP5IF1,BAZ2B,BEND4,BHLHE40,BIRC6,BMS1,BPIFB3,BRPF3,BST1,C10orf67,CACNA1D,CACNA1I,CACNA1S,CADM2,CAPN6,CARF,CCDC134,CCDC66,CCDC85A,CD276,CDH23,CDH7,CDKN1A,CELSR3,CENPJ,CHDH,CHST6,CIBAR1,CLCA1,CLCA4,CLCN2,CLTCL1,CNTN6,CNTNAP2,CNTNAP4,COL4A2,COL5A1,COL6A3,COL6A6,COL8A1,CORO7/COR…	323
Diseases and Disorders	Cancer,Organismal Injury and Abnormalities,Respiratory Disease	lung cancer	Lung cancer	3.57e-18	3.41e-16	AADAC,ABCA2,ABCB9,ABCC1,ABCF2,ABI2,ADAM23,ADAMTS6,ADCY2,ADM,ADRM1,AGBL4,AGRN,AHCY,AKAP9,ARHGEF33,ARVCF,ASB3/GPR75-ASB3,ASH1L,ASTN2,ATN1,ATP5IF1,BCL11A,BEND4,BIRC6,BMS1,BST1,C2orf49,CACNA1D,CACNA1I,CACNA1S,CADPS2,CALN1,CAPN6,CASP8,CCDC71,CCDC85A,CDC45,CDH23,CDH7,CDHR1,CDKN1A,CENPJ,CENPT,CHRNB4,CHST5,CHST6,CIBAR1,CKB,CLCA1,CLCA2,CLCA4,CLCN2,CNTNAP2,CNTNAP4,CNTNAP5,COL4A2,COL5A1,COL6A3,COL8A1,COL9A2…	351
Diseases and Disorders	Cancer,Organismal Injury and Abnormalities	intrathoracic malignant tumor	Intrathoracic malignant tumor	3.84e-18	3.65e-16	AADAC,ABCA2,ABCB9,ABCC1,ABCF2,ABI2,ADAM23,ADAMTS6,ADCY2,ADM,ADRM1,AGBL4,AGRN,AHCY,AKAP9,ARHGEF33,ARVCF,ASB3/GPR75-ASB3,ASH1L,ASTN2,ATN1,ATP5IF1,BCL11A,BEND4,BIRC6,BMS1,BST1,C2orf49,CACNA1D,CACNA1I,CACNA1S,CADPS2,CALN1,CAPN6,CASP8,CCDC71,CCDC85A,CDC45,CDH23,CDH7,CDHR1,CDKN1A,CENPJ,CENPT,CHRNB4,CHST5,CHST6,CIBAR1,CKB,CLCA1,CLCA2,CLCA4,CLCN2,CNTNAP2,CNTNAP4,CNTNAP5,COL4A2,COL5A1,COL6A3,COL8A1,COL9A2…	352
Diseases and Disorders	Cancer,Organismal Injury and Abnormalities	extrapulmonary squamous cell carcinoma	Extrapulmonary squamous cell carcinoma	4.32e-18	4.08e-16	AADAC,ABCA2,ABCA7,ABCC1,ABCG8,ACO2,ADAMTS6,AFF3,AKAP9,ALPK3,ANK3,ANKRD34C,ARHGAP26,ARVCF,ASPN,ATN1,BAZ2B,BCL11A,BIRC6,BMS1,BRPF3,CACNA1D,CACNA1S,CADM2,CADPS2,CASP8,CCDC134,CCDC66,CCDC85A,CCDC92,CD276,CDC45,CDH23,CDH7,CDK2AP1,CDX2,CELSR3,CENPJ,CENPT,CEP128,CEP85L,CHST6,CLCA4,CLTCL1,CNTN6,CNTNAP2,CNTNAP4,CNTNAP5,COL4A2,COL5A1,COL6A3,COL6A6,COL8A1,COMT,CPS1,CPT1C,CSMD1,CSMD3,CTNNA3,CXCL14,CXXC4,DAGL…	302
Diseases and Disorders	Cancer,Organismal Injury and Abnormalities,Reproductive System Disease	prostate cancer	Prostate cancer	4.74e-18	4.45e-16	ABCB9,ABCC1,ADAMTS6,ADAT1,ADCY2,ADRM1,ADSL,AEBP1,AKAP9,ALDH18A1,ALDH7A1,ALPK3,ANK3,AP3B2,ARHGEF3,ARVCF,ASH1L,ASPN,ASTN2,B3GNT4,BAZ2B,BCL11A,BHLHE40,BIRC6,BNC1,C10orf67,C22orf39,CACNA1D,CACNA1S,CADPS2,CALN1,CAPN6,CARF,CASP8,CCDC85A,CDC45,CDH23,CDH7,CDKN1A,CELSR3,CENPT,CHGB,CKB,CLCA4,CLTCL1,CNTN6,CNTNAP2,CNTNAP4,CNTNAP5,COL4A2,COL5A1,COL6A3,COL6A6,COL8A1,COP1,CPEB1,CPNE5,CPS1,CSDC2,CSMD1,CSMD3,CTNN…	316
Diseases and Disorders	Cancer,Organismal Injury and Abnormalities,Reproductive System Disease	neoplasia	Prostatic tumor	5.22e-18	4.87e-16	ABCB9,ABCC1,ADAMTS6,ADAT1,ADCY2,ADRM1,ADSL,AEBP1,AKAP9,ALDH18A1,ALDH7A1,ALPK3,ANK3,AP3B2,ARHGEF3,ARVCF,ASH1L,ASPN,ASTN2,B3GNT4,BAZ2B,BCL11A,BHLHE40,BIRC6,BNC1,C10orf67,C22orf39,CACNA1D,CACNA1S,CADPS2,CALN1,CAPN6,CARF,CASP8,CCDC85A,CDC45,CDH23,CDH7,CDKN1A,CELSR3,CENPT,CHGB,CKB,CLCA4,CLTCL1,CNTN6,CNTNAP2,CNTNAP4,CNTNAP5,COL4A2,COL5A1,COL6A3,COL6A6,COL8A1,COP1,CPEB1,CPNE5,CPS1,CSDC2,CSMD1,CSMD3,CTNN…	317
Diseases and Disorders	Developmental Disorder,Neurological Disease,Organismal Injury and Abnormalities	mental retardation	Mental retardation	6.2e-18	5.75e-16	ABCA2,ALDH18A1,ALDH7A1,ANK3,ASH1L,ATN1,BCL11A,CACNA1D,CD160,CDC45,CHMP1A,CLCN2,CNTNAP2,COA8,COL6A3,COL9A2,COMT,CPS1,DCC,DGCR8,DNAH3,DPP6,DRD2,DYNC2H1,EP300,FBN2,FOXP1,GABRA2,GABRB3,GABRG1,GP1BB,GPR89A/GPR89B,GRIN2A,HCN1,HEXB,HGSNAT,IMPA1,KANSL1,KDM5B,KIDINS220,KMT2C,KMT2D,LINGO1,LIX1L,LOC102724788/PRODH,MYT1L,NIPA1,NIPBL,NLGN3,NLGN4X,NOTCH2NLA/NOTCH2NLB,NRXN1,NSD1,NUDT17,OPA1,OPRD1,OPRK1,OPRM1,PD…	97
Diseases and Disorders	Neurological Disease,Organismal Injury and Abnormalities	cerebral disorder	Cerebral disorder	6.54e-18	6.03e-16	AADAC,ABCA7,ABCG8,ABI2,ACTR8,ADAM23,ADCY2,ADM,AIFM3,AKAP9,ALDH18A1,ANK3,ARF3,ARL8B,ASH1L,ASTN2,B3GNT4,BAG5,BAZ2B,BBX,BHLHE40,BIRC6,BNC1,BST1,C10orf67,CACNA1D,CACNA1S,CACNA2D3,CADPS2,CAMK1D,CASP8,CCDC71,CD302,CDC45,CDH23,CDKN1A,CELSR3,CHDH,CHGB,CHRNA7,CHRNB4,CHST5,CKB,CLCA1,CLTCL1,CNTN6,CNTNAP2,COL4A2,COL5A1,CRHR1,CSDC2,CX3CL1,DBN1,DCAF1,DCAF4L1,DDN,DGCR2,DLC1,DLEC1,DNAH1,DNAH11,DNAH3,DNAH5,DNAH7,…	271
Diseases and Disorders	Cancer,Organismal Injury and Abnormalities	multiple cancers	Multiple cancers	8.19e-18	7.51e-16	ABCA2,ABCB9,ABCC1,ABCF2,ABI2,ACAA1,ADAM23,ADAMTS6,ADCY2,ADRM1,AEBP1,AFF3,AGBL4,AGRN,AKAP9,ALDH18A1,ALDH7A1,ALKBH6,ALPK3,ANKRD34C,AP3B2,ARF3,ARHGEF3,ARHGEF33,ASB3/GPR75-ASB3,ASH1L,ASTN2,ATN1,ATP5IF1,BHLHE40,BIRC6,BMS1,BNC1,BPIFB3,BRPF3,CAB39,CACNA1I,CACNA1S,CACNA2D3,CADPS2,CALN1,CAMKMT,CAPN6,CASP8,CBR4,CCDC85A,CD160,CD276,CD47,CDH23,CDHR1,CDKN1A,CDX2,CELSR3,CEP128,CEP85L,CKB,CLCA1,CLCA2,CLCA4,CLTC…	357
Diseases and Disorders	Cancer,Organismal Injury and Abnormalities	upper aerodigestive tract carcinoma	Upper aerodigestive tract carcinoma	2.02e-17	1.84e-15	ABCA2,ABCA7,ABCB9,ABCC1,ABCG8,ADAMTS6,ADSL,AGBL4,AKAP9,ANK3,ARHGAP26,ARHGEF3,ARVCF,ASPN,ASTN2,ATN1,BAZ2B,BCL11A,BIRC6,BMS1,BRPF3,CABLES2,CACNA1D,CACNA1S,CADPS2,CASP8,CCDC134,CCDC85A,CCDC92,CD276,CDK2AP1,CDX2,CELSR3,CEP128,CEP85L,CHRNA7,CLCA2,CNTN6,CNTNAP4,CNTNAP5,COL4A2,COL5A1,COL6A6,COL8A1,CPT1C,CSMD1,CSMD3,CTNNA3,CXCL14,CXXC4,DCC,DGKQ,DIO2,DLC1,DLEC1,DLX6,DNAH10,DNAH3,DNAH5,DNAH7,DNAJC13,DOK3,D…	223
Diseases and Disorders	Cancer,Organismal Injury and Abnormalities	malignant neoplasm of aerodigestive tract	Malignant neoplasm of aerodigestive tract	2.58e-17	2.34e-15	ABCA2,ABCA7,ABCB9,ABCC1,ABCG8,ADAMTS6,ADSL,AGBL4,AKAP9,ANK3,ARHGAP26,ARHGEF3,ARVCF,ASPN,ASTN2,ATN1,BAZ2B,BCL11A,BIRC6,BMS1,BRPF3,CABLES2,CACNA1D,CACNA1S,CADPS2,CASP8,CCDC134,CCDC85A,CCDC92,CD276,CDK2AP1,CDKN1A,CDX2,CELSR3,CEP128,CEP85L,CHRNA7,CLCA2,CNTN6,CNTNAP4,CNTNAP5,COL4A2,COL5A1,COL6A6,COL8A1,CPT1C,CSMD1,CSMD3,CTNNA3,CXCL14,CXXC4,DCC,DGKQ,DIO2,DLC1,DLEC1,DLX6,DNAH10,DNAH3,DNAH5,DNAH7,DNAJC13…	226
Diseases and Disorders	Cancer,Gastrointestinal Disease,Organismal Injury and Abnormalities	pancreatobiliary tumor	Pancreatobiliary tumor	3.57e-17	3.2e-15	ABCA7,ABCG8,ACTR3,ADAM23,ADAMTS6,ADCY2,ADSL,AFF3,AGBL4,AGRN,AKAP9,ALDH7A1,ANK3,AP3B2,ARHGEF33,ASB3/GPR75-ASB3,ASPN,ATN1,B3GNT4,BAZ2B,BEND4,BIRC6,BMS1,BPIFB3,BRPF3,BST1,C10orf67,CACNA1D,CACNA1I,CACNA1S,CADM2,CAPN6,CARF,CCDC134,CCDC66,CCDC85A,CDH23,CDH7,CDKN1A,CDX2,CELSR3,CENPJ,CHDH,CHST6,CIBAR1,CLCA1,CLCA4,CLTCL1,CNTN6,CNTNAP2,CNTNAP4,COL4A2,COL5A1,COL6A3,COL6A6,COL8A1,CPEB1,CPT1C,CRHR1,CSMD1,CSMD…	295
Diseases and Disorders	Cancer,Gastrointestinal Disease,Organismal Injury and Abnormalities	pancreaticobiliary neoplasm	Pancreaticobiliary neoplasm	3.57e-17	3.2e-15	ABCA7,ABCG8,ACTR3,ADAM23,ADAMTS6,ADCY2,ADSL,AFF3,AGBL4,AGRN,AKAP9,ALDH7A1,ANK3,AP3B2,ARHGEF33,ASB3/GPR75-ASB3,ASPN,ATN1,B3GNT4,BAZ2B,BEND4,BIRC6,BMS1,BPIFB3,BRPF3,BST1,C10orf67,CACNA1D,CACNA1I,CACNA1S,CADM2,CAPN6,CARF,CCDC134,CCDC66,CCDC85A,CDH23,CDH7,CDKN1A,CDX2,CELSR3,CENPJ,CHDH,CHST6,CIBAR1,CLCA1,CLCA4,CLTCL1,CNTN6,CNTNAP2,CNTNAP4,COL4A2,COL5A1,COL6A3,COL6A6,COL8A1,CPEB1,CPT1C,CRHR1,CSMD1,CSMD…	295
Diseases and Disorders	Endocrine System Disorders,Gastrointestinal Disease,Organismal Injury and Abnormalities	pancreatic lesion	Pancreatic lesion	4.87e-17	4.34e-15	ABCA7,ABCG8,ACTR3,ADAM23,ADAMTS6,ADCY2,ADSL,AFF3,AGRN,AKAP9,ALDH7A1,AP3B2,ARHGEF33,ASB3/GPR75-ASB3,ASPN,BAZ2B,BEND4,BIRC6,BMS1,BPIFB3,BRPF3,BST1,C10orf67,CACNA1D,CACNA1I,CACNA1S,CADM2,CAPN6,CARF,CCDC134,CCDC66,CCDC85A,CDH23,CDH7,CDKN1A,CELSR3,CENPJ,CHDH,CHST6,CIBAR1,CLCA4,CLTCL1,CNTN6,CNTNAP2,CNTNAP4,COL4A2,COL5A1,COL6A3,COL6A6,COL8A1,CPEB1,CPT1C,CRHR1,CSMD1,CSMD3,CTNNA3,CXCL14,CXXC4,DCAF1,DCAF4L…	258
Diseases and Disorders	Cancer,Endocrine System Disorders,Gastrointestinal Disease,Organismal Injury and Abnormalities	carcinoma	Pancreatic carcinoma	5.78e-17	5.13e-15	ABCA7,ABCG8,ACTR3,ADAM23,ADAMTS6,ADSL,AGRN,AKAP9,ALDH7A1,AP3B2,ARHGEF33,ASB3/GPR75-ASB3,BAZ2B,BIRC6,BMS1,BPIFB3,BRPF3,BST1,C10orf67,CACNA1D,CACNA1I,CADM2,CAPN6,CARF,CCDC134,CCDC66,CCDC85A,CDH7,CDKN1A,CELSR3,CENPJ,CHST6,CIBAR1,CLCA4,CLTCL1,CNTN6,CNTNAP2,CNTNAP4,COL4A2,COL5A1,COL6A3,COL6A6,COL8A1,CPEB1,CPT1C,CRHR1,CSMD1,CSMD3,CTNNA3,CXCL14,CXXC4,DCAF1,DCAF4L1,DLC1,DNAH1,DNAH10,DNAH11,DNAH3,DNAH5,DN…	221
Diseases and Disorders	Cancer,Endocrine System Disorders,Gastrointestinal Disease,Organismal Injury and Abnormalities	pancreatic cancer	Pancreatic cancer	6.12e-17	5.4e-15	ABCA7,ABCG8,ACTR3,ADAM23,ADAMTS6,ADSL,AGRN,AKAP9,ALDH7A1,AP3B2,ARHGEF33,ASB3/GPR75-ASB3,BAZ2B,BIRC6,BMS1,BPIFB3,BRPF3,BST1,C10orf67,CACNA1D,CACNA1I,CADM2,CAPN6,CARF,CCDC134,CCDC66,CCDC85A,CDH7,CDKN1A,CELSR3,CENPJ,CHST6,CIBAR1,CLCA4,CLTCL1,CNTN6,CNTNAP2,CNTNAP4,COL4A2,COL5A1,COL6A3,COL6A6,COL8A1,CPEB1,CPT1C,CRHR1,CSMD1,CSMD3,CTNNA3,CXCL14,CXXC4,DCAF1,DCAF4L1,DLC1,DNAH1,DNAH10,DNAH11,DNAH3,DNAH5,DN…	230
Diseases and Disorders	Cancer,Organismal Injury and Abnormalities	squamous-cell carcinoma	Squamous-cell carcinoma	2.33e-16	2.04e-14	AADAC,ABCA2,ABCA7,ABCC1,ABCG8,ACO2,ADAMTS6,AFF3,AKAP9,ALPK3,ANK3,ANKRD34C,ARHGAP26,ARVCF,ASPN,ATN1,BAZ2B,BCL11A,BIRC6,BMS1,BRPF3,BST1,CACNA1D,CACNA1S,CADM2,CADPS2,CALN1,CASP8,CCDC134,CCDC66,CCDC85A,CCDC92,CD276,CDC45,CDH23,CDH7,CDK2AP1,CDKN1A,CDX2,CELSR3,CENPJ,CENPT,CEP128,CEP85L,CHST6,CLCA4,CLTCL1,CNTN6,CNTNAP2,CNTNAP4,CNTNAP5,COL4A2,COL5A1,COL6A3,COL6A6,COL8A1,COMT,CPEB1,CPS1,CPT1C,CSMD1,CSMD3,…	322
Diseases and Disorders	Cancer,Endocrine System Disorders,Gastrointestinal Disease,Organismal Injury and Abnormalities	pancreatic tumor	Pancreatic tumor	2.66e-16	2.32e-14	ABCA7,ABCG8,ACTR3,ADAM23,ADAMTS6,ADCY2,ADSL,AFF3,AGRN,AKAP9,ALDH7A1,AP3B2,ARHGEF33,ASB3/GPR75-ASB3,ASPN,BAZ2B,BEND4,BIRC6,BMS1,BPIFB3,BRPF3,BST1,C10orf67,CACNA1D,CACNA1I,CACNA1S,CADM2,CAPN6,CARF,CCDC134,CCDC66,CCDC85A,CDH23,CDH7,CDKN1A,CELSR3,CENPJ,CHDH,CHST6,CIBAR1,CLCA4,CLTCL1,CNTN6,CNTNAP2,CNTNAP4,COL4A2,COL5A1,COL6A3,COL6A6,COL8A1,CPEB1,CPT1C,CRHR1,CSMD1,CSMD3,CTNNA3,CXCL14,CXXC4,DCAF1,DCAF4L…	254
Diseases and Disorders	Cancer,Neurological Disease,Organismal Injury and Abnormalities	brain glioma	Malignant brain glioma	3.85e-16	3.34e-14	AADAC,ABCA7,ABCG8,ACTR8,ADAM23,ADCY2,ADM,AIFM3,AKAP9,ALDH18A1,ANK3,ARF3,ARL8B,ASH1L,ASTN2,B3GNT4,BAG5,BAZ2B,BBX,BHLHE40,BIRC6,BNC1,BST1,C10orf67,CACNA1D,CADPS2,CAMK1D,CCDC71,CD302,CDC45,CDH23,CELSR3,CHDH,CHST5,CKB,CLCA1,CLTCL1,CNTNAP2,COL5A1,CSDC2,DCAF1,DCAF4L1,DDN,DGCR2,DLC1,DLEC1,DNAH1,DNAH11,DNAH3,DNAH5,DNAH7,DNAJC13,DNAJC22,DOK3,DPP7,DUSP6,DYSF,EDC4,EP300,EPB41,EPHB2,ESR1,FAM98B,FBN2,FLG,FMNL…	227
Diseases and Disorders	Cancer,Organismal Injury and Abnormalities	cancer	Cancer of cells	5.39e-16	4.65e-14	AADAC,ABCA2,ABCA7,ABCC1,ABCC6,ABCG8,ACO2,ADAMTS6,ADCY2,ADSL,AFF3,AGBL4,AGRN,AIFM3,AKAP9,ALPK3,ANK3,ANKRD34C,ARHGAP26,ARHGEF3,ARHGEF33,ARVCF,ASPN,ASTN2,ATN1,BAZ2B,BBX,BCL11A,BCL7A,BIRC6,BMS1,BRPF3,BST1,CACNA1D,CACNA1I,CACNA1S,CADM2,CADPS2,CALN1,CASP8,CCDC134,CCDC66,CCDC85A,CCDC92,CD160,CD276,CD47,CDC45,CDH23,CDH7,CDHR1,CDK2AP1,CDKN1A,CDX2,CELSR3,CENPJ,CENPT,CEP128,CEP85L,CHST6,CLCA1,CLCA4,CLTCL1,C…	414
Diseases and Disorders	Cancer,Neurological Disease,Organismal Injury and Abnormalities	gliomatosis cerebri cancer	Gliomatosis cerebri	5.82e-16	5e-14	AADAC,ABCA7,ABCG8,ACTR8,ADAM23,ADCY2,ADM,AIFM3,AKAP9,ALDH18A1,ANK3,ARF3,ARL8B,ASH1L,ASTN2,B3GNT4,BAG5,BAZ2B,BBX,BHLHE40,BIRC6,BNC1,BST1,C10orf67,CACNA1D,CADPS2,CAMK1D,CCDC71,CD302,CDC45,CDH23,CELSR3,CHDH,CHST5,CKB,CLCA1,CLTCL1,CNTNAP2,COL5A1,CSDC2,DCAF1,DCAF4L1,DDN,DGCR2,DLC1,DLEC1,DNAH1,DNAH11,DNAH3,DNAH5,DNAH7,DNAJC13,DNAJC22,DOK3,DPP7,DUSP6,DYSF,EDC4,EP300,EPB41,EPHB2,ESR1,FAM98B,FBN2,FLG,FMNL…	226
Diseases and Disorders	Cancer,Gastrointestinal Disease,Organismal Injury and Abnormalities	pancreatobiliary adenocarcinoma	Pancreatobiliary adenocarcinoma	6.65e-16	5.68e-14	ABCA7,ACTR3,ADAM23,ADAMTS6,ADSL,AGRN,AKAP9,ALDH7A1,AP3B2,ARHGEF33,ASB3/GPR75-ASB3,ATN1,BAZ2B,BIRC6,BMS1,BPIFB3,BRPF3,BST1,C10orf67,CACNA1D,CACNA1I,CADM2,CAPN6,CARF,CCDC134,CCDC66,CCDC85A,CDH7,CDKN1A,CDX2,CELSR3,CENPJ,CHDH,CHST6,CIBAR1,CLCA1,CLCA4,CLTCL1,CNTN6,CNTNAP2,CNTNAP4,COL5A1,COL6A3,COL6A6,COL8A1,CPEB1,CPT1C,CRHR1,CSMD1,CSMD3,CTNNA3,CXCL14,CXXC4,DCAF1,DCAF4L1,DCC,DLC1,DNAH1,DNAH10,DNAH11,DN…	229
Diseases and Disorders	Cancer,Organismal Injury and Abnormalities	hematological or lymphatic system tumor	Hematological or lymphatic system tumor	7.93e-16	6.71e-14	ABCA7,ABCB9,ABCC1,ABCC6,ABCG8,ADAMTS6,ADCY2,ADSL,AFF3,AGBL4,AGRN,AIFM3,AKAP9,ALDH7A1,ANK3,ARHGAP26,ARHGEF3,ARHGEF33,ARVCF,ASB3/GPR75-ASB3,ASH1L,ASTN2,ATN1,BAZ2B,BBX,BCL11A,BCL7A,BIRC6,CACNA1D,CACNA1I,CADM2,CADPS2,CARF,CASP8,CCDC66,CD160,CD47,CDH23,CDH7,CDHR1,CDKN1A,CELSR3,CENPT,CHGB,CHST6,CLCA1,CLCA4,CLCN2,CLDN5,CNTN6,CNTNAP2,CNTNAP4,CNTNAP5,COL4A2,COL6A3,COL6A6,COMT,CPNE5,CPT1C,CRHR1,CRKL,CSGALN…	323
Diseases and Disorders	Cancer,Organismal Injury and Abnormalities,Reproductive System Disease	carcinoma	Breast carcinoma	7.95e-16	6.71e-14	ABCA2,ABI2,ADAM23,ADAMTS6,ADCY2,AEBP1,AGRN,AKAP9,ALDH18A1,ALKBH6,ALPK3,AP3B2,ARF3,ARHGEF3,ASH1L,ASTN2,ATN1,ATP5IF1,BIRC6,BMS1,BPIFB3,CAB39,CACNA1I,CACNA1S,CADPS2,CALN1,CAMKMT,CASP8,CBR4,CCDC85A,CD160,CD276,CDKN1A,CELSR3,CEP128,CEP85L,CKB,CLCA1,CLCA2,CLCA4,CNTN6,COL4A2,COL6A3,COL6A6,COL8A1,CPT1C,CSMD1,CSMD3,CTNNA3,CXCL14,DCC,DGKQ,DIO2,DLC1,DLEC1,DNAH1,DNAH11,DNAH3,DNAH5,DNAH7,DNAJC13,DPP4,DPP6,DYN…	236
Diseases and Disorders	Cancer,Neurological Disease,Organismal Injury and Abnormalities	brain cancer	Brain cancer	8.4e-16	7.06e-14	AADAC,ABCA7,ABCG8,ACTR8,ADAM23,ADCY2,ADM,AIFM3,AKAP9,ALDH18A1,ANK3,ARF3,ARL8B,ASH1L,ASTN2,B3GNT4,BAG5,BAZ2B,BBX,BHLHE40,BIRC6,BNC1,BST1,C10orf67,CACNA1D,CADPS2,CAMK1D,CCDC71,CD302,CDC45,CDH23,CELSR3,CHDH,CHST5,CKB,CLCA1,CLTCL1,CNTNAP2,COL5A1,CSDC2,DCAF1,DCAF4L1,DDN,DGCR2,DLC1,DLEC1,DNAH1,DNAH11,DNAH3,DNAH5,DNAH7,DNAJC13,DNAJC22,DOK3,DPP7,DUSP6,DYSF,EDC4,EGFR,EP300,EPB41,EPHB2,ESR1,FAM98B,FBN2,FBX…	237
Diseases and Disorders	Cancer,Endocrine System Disorders,Gastrointestinal Disease,Organismal Injury and Abnormalities	pancreatic adenocarcinoma	Pancreatic adenocarcinoma	1.11e-15	9.25e-14	ABCA7,ACTR3,ADAM23,ADAMTS6,ADSL,AGRN,AKAP9,ALDH7A1,AP3B2,ARHGEF33,ASB3/GPR75-ASB3,BAZ2B,BIRC6,BMS1,BPIFB3,BRPF3,BST1,C10orf67,CACNA1D,CACNA1I,CADM2,CAPN6,CARF,CCDC134,CCDC66,CCDC85A,CDH7,CDKN1A,CELSR3,CENPJ,CHST6,CIBAR1,CLCA4,CLTCL1,CNTN6,CNTNAP2,CNTNAP4,COL5A1,COL6A3,COL6A6,COL8A1,CPEB1,CPT1C,CRHR1,CSMD1,CSMD3,CTNNA3,CXCL14,CXXC4,DCAF1,DCAF4L1,DLC1,DNAH1,DNAH10,DNAH11,DNAH3,DNAH5,DNAH7,DNAJC13,D…	208
Diseases and Disorders	Cancer,Organismal Injury and Abnormalities	lymphohematopoietic neoplasia	Lymphohematopoietic neoplasia	1.25e-15	1.04e-13	ABCA7,ABCB9,ABCC1,ABCC6,ABCG8,ADAMTS6,ADCY2,ADSL,AFF3,AGBL4,AGRN,AIFM3,AKAP9,ALDH7A1,ANK3,ARHGAP26,ARHGEF3,ARHGEF33,ARVCF,ASB3/GPR75-ASB3,ASH1L,ASTN2,ATN1,BAZ2B,BBX,BCL11A,BCL7A,BIRC6,CACNA1D,CACNA1I,CADM2,CADPS2,CARF,CASP8,CCDC66,CD160,CD47,CDH23,CDH7,CDHR1,CDKN1A,CELSR3,CENPT,CHGB,CHST6,CLCA1,CLCA4,CLCN2,CLDN5,CNTN6,CNTNAP2,CNTNAP4,CNTNAP5,COL4A2,COL6A3,COL6A6,COMT,CPNE5,CPT1C,CRHR1,CRKL,CSGALN…	321
Diseases and Disorders	Cancer,Hematological Disease,Organismal Injury and Abnormalities	hematological neoplasia	Hematopoietic neoplasm	1.37e-15	1.13e-13	ABCA7,ABCB9,ABCC1,ABCC6,ABCG8,ADAMTS6,ADCY2,ADSL,AFF3,AGBL4,AGRN,AIFM3,AKAP9,ALDH7A1,ANK3,ARHGAP26,ARHGEF3,ARHGEF33,ARVCF,ASB3/GPR75-ASB3,ASH1L,ASTN2,ATN1,BAZ2B,BBX,BCL11A,BCL7A,BIRC6,CACNA1D,CACNA1I,CADM2,CADPS2,CARF,CASP8,CCDC66,CD160,CD47,CDH23,CDH7,CDHR1,CDKN1A,CELSR3,CENPT,CHGB,CHST6,CLCA1,CLCA4,CLCN2,CLDN5,CNTN6,CNTNAP2,CNTNAP4,CNTNAP5,COL4A2,COL6A3,COL6A6,COMT,CPNE5,CPT1C,CRHR1,CRKL,CSGALN…	320
Diseases and Disorders	Cancer,Organismal Injury and Abnormalities	head and neck squamous cell cancer	Head and neck squamous cell carcinoma	2.01e-15	1.66e-13	ABCA2,ABCA7,ABCC1,ACO2,ADAMTS6,AKAP9,ALPK3,ARHGAP26,ARVCF,ASPN,ATN1,BAZ2B,BCL11A,BIRC6,BMS1,BRPF3,CACNA1D,CACNA1S,CADPS2,CASP8,CCDC134,CCDC66,CCDC85A,CD276,CDC45,CDH7,CDK2AP1,CDX2,CELSR3,CENPJ,CENPT,CEP128,CEP85L,CLCA4,CLTCL1,CNTNAP2,CNTNAP4,CNTNAP5,COL4A2,COL5A1,COL6A6,COMT,CPS1,CPT1C,CSMD1,CSMD3,CTNNA3,CXCL14,CXXC4,DCC,DLC1,DLX6,DNAH1,DNAH10,DNAH11,DNAH3,DNAH5,DNAH7,DNAJC13,DOK3,DPCD,DPP4,DUSP6…	239
Diseases and Disorders	Cancer,Hematological Disease,Organismal Injury and Abnormalities	myeloid or lymphoid neoplasm	Myeloid or lymphoid neoplasm	2.71e-15	2.22e-13	ABCA7,ABCB9,ABCC1,ABCC6,ABCG8,ADAMTS6,ADCY2,ADSL,AFF3,AGBL4,AGRN,AIFM3,AKAP9,ALDH7A1,ANK3,ARHGAP26,ARHGEF3,ARHGEF33,ARVCF,ASB3/GPR75-ASB3,ASH1L,ASTN2,ATN1,BAZ2B,BBX,BCL11A,BCL7A,BIRC6,CACNA1D,CACNA1I,CADM2,CADPS2,CARF,CASP8,CCDC66,CD160,CD47,CDH23,CDH7,CDHR1,CDKN1A,CELSR3,CENPT,CHGB,CHST6,CLCA1,CLCA4,CLCN2,CNTN6,CNTNAP2,CNTNAP4,CNTNAP5,COL4A2,COL6A3,COL6A6,COMT,CPNE5,CPT1C,CRHR1,CRKL,CSGALNACT2,C…	317
Diseases and Disorders	Hereditary Disorder,Neurological Disease,Organismal Injury and Abnormalities	familial encephalopathy	Familial encephalopathy	2.86e-15	2.33e-13	ABCA2,ABCA7,ABHD16A,ACO2,ADCY2,ADM,AEBP1,AHCY,ALDH18A1,ALDH7A1,ANK3,AP3B2,ASH1L,ATN1,ATP5IF1,BCL11A,BCL7A,BEND4,BHLHE40,CAB39,CACNA1D,CACNA2D3,CASP8,CD160,CDH23,CEP85L,CHGB,CHMP1A,CHRNA7,CKB,CLCN2,CNTNAP2,COL4A2,CPNE5,CPT1C,CX3CL1,DAGLA,DBN1,DCC,DGCR8,DHDDS,DIO2,DNAJC13,DNAJC15,DPP6,DRD2,DSTYK,DUSP6,EEF2,EGFR,EIF2B2,EP300,EPB41,EPHB2,ESR1,FFAR3,FGF17,FOXP1,GABRA2,GABRB3,GABRG1,GFM2,GLE1,GPR37,GRI…	175
Diseases and Disorders	Cancer,Organismal Injury and Abnormalities,Respiratory Disease	development	Development of non-small cell lung carcinoma	3.25e-15	2.64e-13	ABI2,ADAM23,ADCY2,AGRN,AKAP9,ARHGEF33,ASH1L,ATP5IF1,BCL11A,BEND4,BMS1,BST1,C2orf49,CACNA1D,CACNA1I,CACNA1S,CADPS2,CCDC71,CDC45,CDH23,CDH7,CDKN1A,CENPJ,CHST6,CIBAR1,CLCA1,CLCA2,CNTNAP2,CNTNAP4,CNTNAP5,COL5A1,COL6A3,CPS1,CRKL,CSMD1,CSMD3,CTNNA3,DAGLA,DGCR8,DLX6,DNAH11,DNAH3,DNAH5,DNAH7,DOK3,DOP1B,DYSF,EGFR,ENO1,EP300,EPHB2,ERCC5,ERRFI1,ESR1,FAM153A/FAM153B,FBN2,FHIT,FKBP11,FLG,FLT3,FN1,FSCB,GABRA2,…	186
Diseases and Disorders	Cancer,Hematological Disease,Organismal Injury and Abnormalities	hematologic cancer	Hematologic cancer	5.33e-15	4.29e-13	ABCA7,ABCB9,ABCC1,ABCC6,ABCG8,ADAMTS6,ADCY2,ADSL,AFF3,AGBL4,AGRN,AIFM3,AKAP9,ALDH7A1,ANK3,ARHGAP26,ARHGEF3,ARHGEF33,ARVCF,ASB3/GPR75-ASB3,ASH1L,ASTN2,ATN1,BAZ2B,BBX,BCL11A,BCL7A,BIRC6,CACNA1D,CACNA1I,CADM2,CADPS2,CARF,CASP8,CCDC66,CD160,CD47,CDH23,CDH7,CDHR1,CDKN1A,CELSR3,CENPT,CHGB,CHST6,CLCA1,CLCA4,CLCN2,CLDN5,CNTN6,CNTNAP2,CNTNAP4,CNTNAP5,COL4A2,COL6A3,COL6A6,COMT,CPNE5,CPT1C,CRHR1,CRKL,CSGALN…	314
Diseases and Disorders	Cancer,Organismal Injury and Abnormalities	lymphohematopoietic cancer	Lymphohematopoietic cancer	5.35e-15	4.29e-13	ABCA7,ABCB9,ABCC1,ABCC6,ABCG8,ADAMTS6,ADCY2,ADSL,AFF3,AGBL4,AGRN,AIFM3,AKAP9,ALDH7A1,ANK3,ARHGAP26,ARHGEF3,ARHGEF33,ARVCF,ASB3/GPR75-ASB3,ASH1L,ASTN2,ATN1,BAZ2B,BBX,BCL11A,BCL7A,BIRC6,CACNA1D,CACNA1I,CADM2,CADPS2,CARF,CASP8,CCDC66,CD160,CD47,CDH23,CDH7,CDHR1,CDKN1A,CELSR3,CENPT,CHGB,CHST6,CLCA1,CLCA4,CLCN2,CLDN5,CNTN6,CNTNAP2,CNTNAP4,CNTNAP5,COL4A2,COL6A3,COL6A6,COMT,CPNE5,CPT1C,CRHR1,CRKL,CSGALN…	315
Diseases and Disorders	Cancer,Organismal Injury and Abnormalities,Respiratory Disease	lung adenocarcinoma	Lung adenocarcinoma	6.04e-15	4.82e-13	ABI2,ADAM23,ADCY2,AGRN,AKAP9,ARHGEF33,ASH1L,ATP5IF1,BCL11A,BEND4,BMS1,BST1,C2orf49,CACNA1D,CACNA1I,CACNA1S,CADPS2,CCDC71,CDC45,CDH23,CDH7,CDKN1A,CENPJ,CHST6,CIBAR1,CLCA1,CLCA2,CNTNAP2,CNTNAP4,CNTNAP5,COL5A1,COL6A3,CPS1,CRKL,CSMD1,CSMD3,CTNNA3,DAGLA,DGCR8,DLX6,DNAH11,DNAH3,DNAH5,DNAH7,DOK3,DOP1B,DYSF,EGFR,ENO1,EP300,EPHB2,ERCC5,ERRFI1,ESR1,FAM153A/FAM153B,FBN2,FHIT,FKBP11,FLG,FLT3,FN1,FSCB,GABRA2,…	185
Diseases and Disorders	Cancer,Organismal Injury and Abnormalities	mixed neoplasia	Mixed neoplasia	6.18e-15	4.91e-13	ABCB9,ABCF2,ADCY2,AFF3,ALKBH6,ANKRD34C,AP3B2,ARHGEF33,ASH1L,ATP5IF1,BNC1,CACNA1I,CACNA2D3,CAPN6,CD47,CEP128,CHRNA7,CNTN6,CNTNAP2,CNTNAP5,COL4A2,COL5A1,COL6A3,COL6A6,COMT,CORO7/CORO7-PAM16,CSMD1,CSMD3,DBN1,DCAF1,DCC,DGCR8,DIO2,DNAH11,DNAH3,DNAH5,DPP4,DPP6,DYNC2H1,EDC4,EFL1,EGFR,EP300,ESR1,FAXC,FBN2,FBN3,FBXO10,FLG,FPR2,FSCB,GABRA2,HIRA,HOXB4,HRH2,HSP90AA1,HYKK,IGSF10,IGSF3,INO80D,KCNH5,KIDINS220,K…	152
Diseases and Disorders	Cancer,Endocrine System Disorders,Gastrointestinal Disease,Organismal Injury and Abnormalities	pancreatic ductal adenocarcinoma	Pancreatic ductal adenocarcinoma	7.28e-15	5.75e-13	ABCA7,ACTR3,ADAM23,ADAMTS6,ADSL,AGRN,AKAP9,ALDH7A1,AP3B2,ARHGEF33,ASB3/GPR75-ASB3,BAZ2B,BIRC6,BMS1,BPIFB3,BRPF3,BST1,C10orf67,CACNA1D,CACNA1I,CADM2,CAPN6,CARF,CCDC134,CCDC66,CCDC85A,CDH7,CDKN1A,CELSR3,CENPJ,CHST6,CIBAR1,CLCA4,CLTCL1,CNTN6,CNTNAP2,CNTNAP4,COL5A1,COL6A3,COL6A6,COL8A1,CPEB1,CPT1C,CRHR1,CSMD1,CSMD3,CTNNA3,CXCL14,CXXC4,DCAF1,DCAF4L1,DLC1,DNAH1,DNAH10,DNAH11,DNAH3,DNAH5,DNAH7,DNAJC13,D…	201
Diseases and Disorders	Hereditary Disorder,Organismal Injury and Abnormalities,Psychological Disorders	familial psychiatric disease	Familial psychiatric disease	1.91e-14	1.5e-12	ABCA7,ACO2,ADCY2,AEBP1,AHCY,ANK3,ASTN2,ATN1,ATP5IF1,BCL7A,BHLHE40,CAB39,CACNA2D3,CADPS2,CASP8,CD160,CDH23,CHGB,CHMP1A,CHRNA7,CKB,CNTN6,CNTNAP2,COL4A2,COMT,CPNE5,CSMD1,CX3CL1,DBN1,DIO2,DNAH7,DNAJC13,DRD2,EEF2,EIF2B2,EPB41,EPHB2,ESR1,FFAR3,FHIT,FOXP1,GABRA2,GABRB3,GABRG1,GLE1,GPR37,GRIN2A,GTF3A,HSP90AA1,ICA1,IFIH1,IMPA1,INO80D,IP6K2,KCNH7,KCNIP4,LINGO1,LOC102724788/PRODH,LZTR1,MAPT,MECR,MPO,MPRIP,M…	120
Diseases and Disorders	Cancer,Organismal Injury and Abnormalities	upper aero-digestive squamous cell carcinoma	Upper aero-digestive squamous cell carcinoma	2.1e-14	1.64e-12	ABCA2,ABCA7,ABCC1,ABCG8,ADAMTS6,AKAP9,ARHGAP26,ARVCF,ASPN,ATN1,BAZ2B,BCL11A,BIRC6,BMS1,BRPF3,CACNA1D,CADPS2,CASP8,CCDC134,CCDC92,CD276,CDK2AP1,CDX2,CELSR3,CEP128,CEP85L,CNTNAP4,CNTNAP5,COL4A2,COL5A1,COL6A6,CPT1C,CSMD1,CSMD3,CTNNA3,CXCL14,CXXC4,DCC,DLC1,DLEC1,DLX6,DNAH10,DNAH5,DNAH7,DNAJC13,DOK3,DPCD,DPP4,DYNC2H1,DYSF,EFL1,EFNA5,EGFR,EP300,ERCC5,FAM184A,FBN2,FBXO10,FIP1L1,FLG,FLT3,FN1,FSCB,GLE1,GP…	169
Diseases and Disorders	Cancer,Hematological Disease,Organismal Injury and Abnormalities	neoplasia	Neoplasia of blood cells	3.59e-14	2.79e-12	ABCA7,ABCB9,ABCC1,ABCC6,ABCG8,ADAMTS6,ADCY2,ADSL,AFF3,AGBL4,AGRN,AIFM3,AKAP9,ALDH7A1,ANK3,ARHGAP26,ARHGEF3,ARHGEF33,ARVCF,ASB3/GPR75-ASB3,ASH1L,ASTN2,ATN1,BAZ2B,BBX,BCL11A,BCL7A,BIRC6,CACNA1D,CACNA1I,CADM2,CADPS2,CARF,CASP8,CCDC66,CD160,CD47,CDH7,CDHR1,CDKN1A,CELSR3,CENPT,CHGB,CHST6,CLCA1,CLCA4,CLCN2,CNTN6,CNTNAP2,CNTNAP4,CNTNAP5,COL4A2,COL6A3,COL6A6,COMT,CPNE5,CPT1C,CRHR1,CRKL,CSGALNACT2,CSMD1,C…	301
Diseases and Disorders	Cancer,Hematological Disease,Immunological Disease,Organismal Injury and Abnormalities	acute leukemia	Acute leukemia	4.72e-14	3.66e-12	ABCB9,ABCC1,ABCG8,ADCY2,AFF3,AKAP9,ALDH7A1,ANK3,ARHGAP26,ARHGEF33,ARVCF,ASB3/GPR75-ASB3,ASH1L,ASTN2,BAZ2B,BBX,CACNA1I,CADM2,CADPS2,CARF,CASP8,CCDC66,CD47,CDH7,CDHR1,CDKN1A,CELSR3,CENPT,CHGB,CHST6,CLCA1,CLCA4,CLCN2,CNTN6,CNTNAP2,CNTNAP4,CNTNAP5,COL6A3,COL6A6,CPNE5,CPT1C,CRHR1,CSMD1,DBN1,DCAF12,DGCR2,DHX57,DIABLO,DLC1,DLEC1,DNAH1,DNAH11,DNAH5,DNAH7,DOP1B,DPP6,DYNC2H1,EDC4,EGFR,EP300,ERC2,ESR1,ETS1,…	195
Physiological System Development and Function	Behavior	cognition	Cognition	1.08e-13	8.33e-12	ABCA7,ABI2,ANK3,CADPS2,CARF,CBR3,CD47,CHRNA7,CKB,CLDN5,CNTNAP2,COMT,CPT1C,CRHR1,CSMD1,DGCR2,DOP1B,DRD2,DSTYK,EFL1,EP300,EPB41,EPHB2,ESR1,GABRB3,GRIN2A,HCN1,HDC,HRH2,JUND,KALRN,KCNH3,KCNJ11,KMT2D,LMO4,MAPK3,MAPT,MCHR1,NIPBL,NLGN3,NLGN4X,NOTCH1,NPAS3,NPTN,NR4A2,NRCAM,NRXN1,NSUN5,OPRM1,PARK7,PCM1,PDCD1,PREX1,PTPRN2,RCAN1,RELN,RIMS1,SEPTIN5,SHANK2,SLC24A2,SLC6A4,SORCS3,ST13,TANC1,TBR1,TBX1,TCF20,UCHL…	72
Diseases and Disorders	Cancer,Organismal Injury and Abnormalities,Reproductive System Disease	breast cancer	Breast cancer	1.32e-13	1.02e-11	ABCA2,ABCC1,ABI2,ACAA1,ADAM23,ADAMTS6,ADCY2,ADRM1,AEBP1,AGRN,AKAP9,ALDH18A1,ALKBH6,ALPK3,AP3B2,ARF3,ARHGEF3,ASH1L,ASTN2,ATN1,ATP5IF1,BHLHE40,BIRC6,BMS1,BPIFB3,CAB39,CACNA1I,CACNA1S,CADPS2,CALN1,CAMKMT,CASP8,CBR4,CCDC85A,CD160,CD276,CDKN1A,CELSR3,CEP128,CEP85L,CKB,CLCA1,CLCA2,CLCA4,CLTCL1,CNTN6,COL4A2,COL6A3,COL6A6,COL8A1,COMT,CPEB1,CPT1C,CSMD1,CSMD3,CTNNA3,CXCL14,DCC,DGKQ,DIO2,DLC1,DLEC1,DNAH1,DN…	267
Diseases and Disorders	Cancer,Endocrine System Disorders,Organismal Injury and Abnormalities,Reproductive System Disease	epithelial ovarian tumor	Ovarian carcinoma	1.98e-13	1.51e-11	ABCB9,ABCF2,ADCY2,AEBP1,AFF3,AGBL4,AKAP9,ALDH7A1,ANKRD34C,ARHGEF33,ASB3/GPR75-ASB3,ASH1L,BNC1,BRPF3,CACNA2D3,CADPS2,CAPN6,CASP8,CD47,CDH23,CDHR1,CDKN1A,CDX2,CELSR3,CEP128,CLCA1,CLTCL1,CNTNAP2,CNTNAP5,COL4A2,COL5A1,COL6A3,COL6A6,COMT,CPS1,CRKL,CSMD1,CSMD3,DCAF1,DIO2,DNAH11,DNAH3,DNAH5,DNAH7,DPP4,DPP6,DYNC2H1,EDC4,EFL1,EGFR,EP300,ESR1,EXOC3L4,FAM153A/FAM153B,FBN2,FBN3,FBXO10,FLG,FLT3,FPR2,GPR75,GTF…	162
Diseases and Disorders	Developmental Disorder,Neurological Disease,Organismal Injury and Abnormalities	intellectual disability and developmental delay	Intellectual disability and developmental delay	1.99e-13	1.51e-11	ATN1,CD160,CDC45,COA8,COMT,GP1BB,GPR89A/GPR89B,KDM5B,LIX1L,LOC102724788/PRODH,NIPA1,NOTCH2NLA/NOTCH2NLB,NUDT17,PDZK1,PEX11B,PI4KA,PIAS3,POLR3C,RIMS1,RNF115,RTN4R,SCARF2,SERPIND1,TANGO2,TBX1,TRAF3,TRIO,TUBGCP5	28
Diseases and Disorders	Cancer,Hematological Disease,Immunological Disease,Organismal Injury and Abnormalities	leukemia	Leukemia	2.11e-13	1.6e-11	ABCB9,ABCC1,ABCG8,ADCY2,AFF3,AKAP9,ALDH7A1,ANK3,ARHGAP26,ARHGEF33,ARVCF,ASB3/GPR75-ASB3,ASH1L,ASTN2,BAZ2B,BBX,CACNA1I,CADM2,CADPS2,CARF,CASP8,CCDC66,CD160,CD47,CDH7,CDHR1,CDKN1A,CELSR3,CENPT,CHGB,CHST6,CLCA1,CLCA4,CLCN2,CLDN5,CNTN6,CNTNAP2,CNTNAP4,CNTNAP5,COL6A3,COL6A6,CPNE5,CPT1C,CRHR1,CSMD1,DAGLA,DBN1,DCAF12,DGCR2,DHX57,DIABLO,DLC1,DLEC1,DNAH1,DNAH11,DNAH3,DNAH5,DNAH7,DOP1B,DPP4,DPP6,DYNC2H1,ED…	217
Diseases and Disorders	Cancer,Hematological Disease,Organismal Injury and Abnormalities	myelodysplastic syndrome or leukemia	Myelodysplastic syndrome or leukemia	2.81e-13	2.12e-11	ABCB9,ABCC1,ABCG8,ADCY2,AFF3,AKAP9,ALDH7A1,ANK3,ARHGAP26,ARHGEF33,ARVCF,ASB3/GPR75-ASB3,ASH1L,ASTN2,BAZ2B,BBX,CACNA1I,CADM2,CADPS2,CARF,CASP8,CCDC66,CD160,CD47,CDH7,CDHR1,CDKN1A,CELSR3,CENPT,CHGB,CHST6,CLCA1,CLCA4,CLCN2,CLDN5,CNTN6,CNTNAP2,CNTNAP4,CNTNAP5,COL6A3,COL6A6,CPNE5,CPT1C,CRHR1,CSMD1,CSMD3,DAGLA,DBN1,DCAF12,DGCR2,DHX57,DIABLO,DLC1,DLEC1,DNAH1,DNAH11,DNAH3,DNAH5,DNAH7,DOP1B,DPP4,DPP6,DYNC…	222
Diseases and Disorders	Cancer,Endocrine System Disorders,Organismal Injury and Abnormalities,Reproductive System Disease	development	Development of gonadal tumor	3.12e-13	2.34e-11	ABCB9,ABCF2,ADCY2,AEBP1,AFF3,AGBL4,AKAP9,ALDH7A1,AMH,ANKRD34C,ARHGEF33,ASB3/GPR75-ASB3,ASH1L,BNC1,BRPF3,CACNA2D3,CADPS2,CAPN6,CD47,CDH23,CDHR1,CDKN1A,CDX2,CELSR3,CEP128,CLTCL1,CNTNAP2,CNTNAP5,COL4A2,COL5A1,COL6A3,COL6A6,COMT,CPS1,CRKL,CSMD1,CSMD3,DCAF1,DIO2,DNAH11,DNAH3,DNAH5,DNAH7,DPP4,DPP6,DYNC2H1,EDC4,EFL1,EGFR,EP300,EXOC3L4,FAM153A/FAM153B,FBN2,FBN3,FBXO10,FLG,FLT3,FPR2,GPR75,GTF2IRD1,HRH2,HS…	156
Diseases and Disorders	Cancer,Organismal Injury and Abnormalities,Respiratory Disease	non-small cell lung cancer	Non-small cell lung carcinoma	3.45e-13	2.58e-11	ABI2,ADAM23,ADCY2,AGRN,AKAP9,ARHGEF33,ASH1L,ATN1,ATP5IF1,BCL11A,BEND4,BMS1,BST1,C2orf49,CACNA1D,CACNA1I,CACNA1S,CADPS2,CALN1,CASP8,CCDC71,CDC45,CDH23,CDH7,CDKN1A,CENPJ,CHRNB4,CHST6,CIBAR1,CLCA1,CLCA2,CNTNAP2,CNTNAP4,CNTNAP5,COL5A1,COL6A3,COL8A1,CORO7/CORO7-PAM16,CPEB1,CPS1,CRKL,CSMD1,CSMD3,CTNNA3,DAGLA,DCC,DGCR8,DLX6,DNAH10,DNAH11,DNAH3,DNAH5,DNAH7,DOK3,DOP1B,DPP4,DUSP6,DYSF,EGFR,ENO1,EP300,EPHB2…	225
Diseases and Disorders	Cancer,Endocrine System Disorders,Organismal Injury and Abnormalities,Reproductive System Disease	ovarian adenocarcinoma	Ovarian adenocarcinoma	4.29e-13	3.19e-11	ABCB9,ABCF2,ADCY2,AEBP1,AFF3,AGBL4,AKAP9,ALDH7A1,ANKRD34C,ARHGEF33,ASB3/GPR75-ASB3,ASH1L,BNC1,BRPF3,CACNA2D3,CADPS2,CAPN6,CD47,CDH23,CDHR1,CDKN1A,CDX2,CELSR3,CEP128,CLTCL1,CNTNAP2,CNTNAP5,COL4A2,COL5A1,COL6A3,COL6A6,COMT,CPS1,CRKL,CSMD1,CSMD3,DCAF1,DIO2,DNAH11,DNAH3,DNAH5,DNAH7,DPP4,DPP6,DYNC2H1,EDC4,EFL1,EGFR,EP300,EXOC3L4,FAM153A/FAM153B,FBN2,FBN3,FBXO10,FLG,FLT3,FPR2,GPR75,GTF2IRD1,HRH2,HSP90A…	155
Diseases and Disorders	Cancer,Organismal Injury and Abnormalities	liquid tumor	Liquid tumor	4.72e-13	3.49e-11	ABCB9,ABCC1,ABCG8,ADCY2,AFF3,AKAP9,ALDH7A1,ANK3,ARHGAP26,ARHGEF33,ARVCF,ASB3/GPR75-ASB3,ASH1L,ASTN2,BAZ2B,BBX,CACNA1I,CADM2,CADPS2,CARF,CASP8,CCDC66,CD160,CD47,CDH7,CDHR1,CDKN1A,CELSR3,CENPT,CHGB,CHST6,CLCA1,CLCA4,CLCN2,CLDN5,CNTN6,CNTNAP2,CNTNAP4,CNTNAP5,COL6A3,COL6A6,CPNE5,CPT1C,CRHR1,CSMD1,CSMD3,DAGLA,DBN1,DCAF12,DGCR2,DHX57,DIABLO,DLC1,DLEC1,DNAH1,DNAH11,DNAH3,DNAH5,DNAH7,DOP1B,DPP4,DPP6,DYNC…	225
Diseases and Disorders	Cancer,Organismal Injury and Abnormalities,Reproductive System Disease	mammary tumor	Mammary tumor	1.19e-12	8.75e-11	ABCA2,ABCC1,ABI2,ACAA1,ADAM23,ADAMTS6,ADCY2,ADRM1,AEBP1,AGRN,AKAP9,ALDH18A1,ALKBH6,ALPK3,AP3B2,ARF3,ARHGEF3,ASH1L,ASTN2,ATN1,ATP5IF1,BHLHE40,BIRC6,BMS1,BPIFB3,CAB39,CACNA1I,CACNA1S,CADPS2,CALN1,CAMKMT,CASP8,CBR3,CBR4,CCDC85A,CD160,CD276,CDKN1A,CELSR3,CEP128,CEP85L,CKB,CLCA1,CLCA2,CLCA4,CLTCL1,CNTN6,COL4A2,COL6A3,COL6A6,COL8A1,COMT,CPEB1,CPT1C,CSMD1,CSMD3,CTNNA3,CX3CL1,CXCL14,DCC,DGKQ,DIO2,DLC1,DL…	271
Diseases and Disorders	Cancer,Endocrine System Disorders,Organismal Injury and Abnormalities,Reproductive System Disease	ovarian cancer	Ovarian cancer	1.48e-11	1.09e-09	ABCB9,ABCF2,ADCY2,AEBP1,AFF3,AGBL4,AKAP9,ALDH7A1,ANKRD34C,ARHGEF33,ASB3/GPR75-ASB3,ASH1L,BNC1,BRPF3,CACNA2D3,CADPS2,CAPN6,CASP8,CD47,CDH23,CDHR1,CDKN1A,CDX2,CELSR3,CEP128,CLCA1,CLTCL1,CNTNAP2,CNTNAP5,COL4A2,COL5A1,COL6A3,COL6A6,COMT,CPS1,CRKL,CSMD1,CSMD3,CXCL14,DCAF1,DIO2,DNAH11,DNAH3,DNAH5,DNAH7,DPP4,DPP6,DYNC2H1,EDC4,EFL1,EGFR,ENO1,EP300,ESR1,EXOC3L4,FAM153A/FAM153B,FBN2,FBN3,FBXO10,FLG,FLT3,FN…	169
Diseases and Disorders	Organismal Injury and Abnormalities,Psychological Disorders	schizophrenia spectrum disorder	Schizophrenia spectrum disorder	3.8e-11	2.77e-09	ANK3,ASTN2,CACNA1I,CACNA2D3,CADPS2,CHRNA7,CHRNB4,CNTN6,CNTNAP2,COMT,CSMD1,DGCR2,DNAH10,DNAH7,DPP6,DRD2,EGFR,ESR1,FHIT,FOXP1,GABRA2,GABRB3,GABRG1,GPR37,GRIN2A,GTF2IRD1,HRH2,KCNH7,KCNK1,KLC1,KMT2C,LMO4,LOC102724788/PRODH,MDH1,NDUFA6,NINL,NLGN3,NLGN4X,NPAS3,NPRL2,NR4A2,NRXN1,NSF,OFCC1,OLFM1,OPRD1,OPRK1,OPRM1,PHOX2B,PMM1,POU3F2,RBFOX1,RELN,RGS12,RTN4R,SCN5A,SHANK2,SLC6A2,SLC6A4,SPRY2,SULT4A1,TENM4,TH…	66
Diseases and Disorders	Neurological Disease,Organismal Injury and Abnormalities	motor dysfunction or movement disorder	Motor dysfunction or movement disorder	3.87e-11	2.81e-09	ABCA2,ADAM23,ADCY2,AEBP1,AGRN,AHCY,ANK3,ATN1,ATP5IF1,BCL7A,BHLHE40,CAB39,CACNA1D,CACNA1I,CACNA2D3,CASP8,CD160,CHGB,CHRNA7,CHRNB4,CKB,CLCN2,COL6A3,COMT,CPNE5,CTNNA3,CX3CL1,DAGLA,DBN1,DCC,DIO2,DNAJC13,DRD2,EEF2,EFL1,EPB41,EPHB2,ERRFI1,ESR1,FFAR3,FGF17,FOXP1,GABRA2,GABRB3,GABRG1,GAK,GPR37,GRIN2A,GTF3A,HDC,HEXB,HSP90AA1,ICA1,IFIH1,IMPA1,INO80D,IP6K2,KCNC3,KCNH7,KCNIP4,KCNJ11,KMT2C,LINGO1,MAPT,MDH1,ME…	133
Diseases and Disorders	Cancer,Organismal Injury and Abnormalities	neoplasia	Lymphatic system tumor	4.52e-11	3.27e-09	ABCA7,ABCC1,ABCC6,ADAMTS6,ADCY2,ADSL,AGBL4,AGRN,AIFM3,ANK3,ARHGAP26,ARHGEF3,ARHGEF33,ARVCF,ASH1L,ASTN2,ATN1,BAZ2B,BBX,BCL11A,BCL7A,BIRC6,CACNA1D,CACNA1I,CADPS2,CASP8,CCDC66,CD160,CD47,CDH23,CDH7,CDHR1,CDKN1A,CELSR3,CHST6,CLCA1,CLCA4,CNTN6,CNTNAP2,CNTNAP4,CNTNAP5,COL4A2,COL6A3,COMT,CPNE5,CRHR1,CRKL,CSGALNACT2,CSMD1,CSMD3,CXCL14,DAGLA,DAP,DCC,DGCR2,DHX57,DIABLO,DLC1,DNAH1,DNAH11,DNAH3,DNAH5,DNAH7,D…	240
Diseases and Disorders	Hematological Disease,Immunological Disease,Organismal Injury and Abnormalities	lymphoproliferative disorder	Lymphoproliferative disorder	5.6e-11	4.03e-09	ABCA7,ABCC1,ABCC6,ADAMTS6,ADCY2,ADSL,AGBL4,AGRN,AIFM3,ANK3,ARHGAP26,ARHGEF3,ARHGEF33,ARVCF,ASH1L,ASTN2,ATN1,BAZ2B,BBX,BCL11A,BCL7A,BIRC6,CACNA1D,CACNA1I,CADPS2,CASP8,CCDC66,CD160,CD47,CDH23,CDH7,CDHR1,CDKN1A,CELSR3,CHST6,CLCA1,CLCA4,CNTN6,CNTNAP2,CNTNAP4,CNTNAP5,COL4A2,COL6A3,COMT,CPNE5,CRHR1,CRKL,CSGALNACT2,CSMD1,CSMD3,CXCL14,DAGLA,DAP,DCC,DGCR2,DHX57,DIABLO,DLC1,DNAH1,DNAH11,DNAH3,DNAH5,DNAH7,D…	237
Physiological System Development and Function	Behavior	learning	Learning	5.9e-11	4.23e-09	ABCA7,ABI2,CADPS2,CARF,CD47,CHRNA7,CKB,CLDN5,CNTNAP2,COMT,CPT1C,CRHR1,CSMD1,DRD2,DSTYK,EFL1,EP300,EPB41,EPHB2,ESR1,GABRB3,GRIN2A,HCN1,HDC,HRH2,KALRN,KCNH3,KCNJ11,KMT2D,LMO4,MAPK3,MAPT,MCHR1,NLGN3,NLGN4X,NOTCH1,NPAS3,NPTN,NR4A2,NRCAM,NRXN1,OPRM1,PARK7,PCM1,PREX1,PTPRN2,RCAN1,RELN,RIMS1,SEPTIN5,SHANK2,SLC24A2,SLC6A4,SORCS3,TANC1,TBR1,TBX1,TCF20,UNC13C,VGF,WWC1,ZDHHC8	62
Diseases and Disorders	Cancer,Endocrine System Disorders,Organismal Injury and Abnormalities,Reproductive System Disease	neoplasia	Ovarian tumor	7.04e-11	5.02e-09	ABCB9,ABCF2,ADCY2,AEBP1,AFF3,AGBL4,AKAP9,ALDH7A1,ANKRD34C,ARHGEF33,ASB3/GPR75-ASB3,ASH1L,BNC1,BRPF3,CACNA2D3,CADPS2,CAPN6,CASP8,CD47,CDH23,CDHR1,CDKN1A,CDX2,CELSR3,CEP128,CLCA1,CLTCL1,CNTNAP2,CNTNAP5,COL4A2,COL5A1,COL6A3,COL6A6,COMT,CPS1,CRKL,CSMD1,CSMD3,CXCL14,DCAF1,DIO2,DNAH11,DNAH3,DNAH5,DNAH7,DPP4,DPP6,DYNC2H1,EDC4,EFL1,EGFR,ENO1,EP300,ESR1,EXOC3L4,FAM153A/FAM153B,FBN2,FBN3,FBXO10,FLG,FLT3,FN…	170
Diseases and Disorders	Cancer,Organismal Injury and Abnormalities,Renal and Urological Disease	urinary tract cancer	Urinary tract cancer	7.63e-11	5.42e-09	ABCA2,ABCB9,ABCC1,ABCC6,ADAM23,ADAMTS6,ADCY2,ADM,AEBP1,AFF3,AKAP9,ALDH7A1,ALPK3,ARHGAP26,ASH1L,ATP5IF1,BHLHE40,BIRC6,BRPF3,BST1,CACNA1I,CACNA1S,CACNA2D3,CADM2,CADPS2,CALN1,CAPN6,CARF,CASP8,CCDC71,CD276,CDH23,CDH7,CDKN1A,CELSR3,CENPT,CEP128,CHRNA7,CHRNB4,CLCA1,CLCN2,CNTNAP2,COL6A3,COMT,CORO7/CORO7-PAM16,CPS1,CSMD1,CSMD3,CXXC4,DAGLA,DCC,DGCR6/LOC102724770,DGCR8,DHDDS,DLC1,DLX6,DNAH3,DNAH5,DNAH7,DNA…	237
Diseases and Disorders	Cancer,Organismal Injury and Abnormalities	lymphoid cancer	Lymphoid cancer	7.8e-11	5.52e-09	ABCA7,ABCC1,ABCC6,ADAMTS6,ADCY2,ADSL,AGBL4,AGRN,AIFM3,ANK3,ARHGAP26,ARHGEF3,ARHGEF33,ARVCF,ASH1L,ASTN2,ATN1,BAZ2B,BBX,BCL11A,BCL7A,BIRC6,CACNA1D,CACNA1I,CADPS2,CASP8,CCDC66,CD160,CD47,CDH23,CDH7,CDHR1,CDKN1A,CELSR3,CHST6,CLCA1,CLCA4,CNTN6,CNTNAP2,CNTNAP4,CNTNAP5,COL4A2,COL6A3,COMT,CPNE5,CRHR1,CRKL,CSGALNACT2,CSMD1,CSMD3,CXCL14,DAGLA,DAP,DCC,DGCR2,DHX57,DIABLO,DLC1,DNAH1,DNAH11,DNAH3,DNAH5,DNAH7,D…	237
Molecular and Cellular Functions	Cellular Movement	cell movement	Cell movement of neurons	8.14e-11	5.73e-09	CADPS2,CDH23,CELSR3,CEP85L,CNTNAP2,CRKL,CX3CL1,DBN1,DCC,DGCR8,DRD2,EFNA5,EPHB2,ERRFI1,FN1,HSP90AA1,KIF20B,LMO4,MAPT,MDGA2,MRTFA,NEO1,NOTCH1,NR4A2,NRCAM,PCM1,PEX11B,PEX2,PHOX2B,POU3F2,POU4F3,PREX1,RELN,RERE,ROBO3,SDC3,TBR1,TNN,TRIO,TUBA1A	40
Diseases and Disorders	Cancer,Organismal Injury and Abnormalities,Respiratory Disease	upper airway cancer	Upper airway cancer	1e-10	7.01e-09	ABCA7,ABCB9,AKAP9,ANK3,ARHGAP26,ARHGEF3,BRPF3,CABLES2,CACNA1S,CASP8,CDX2,CELSR3,CLCA2,CNTNAP4,CNTNAP5,COL5A1,COL6A6,CPT1C,CSMD3,CTNNA3,DCC,DGKQ,DLC1,DNAH5,DNAH7,DOK3,EGFR,EP300,ERCC5,ESR1,FAM153A/FAM153B,FAM193B,FBN2,FIP1L1,FLG,FMNL3,FSCB,GAK,GPRIN1,HSP90AA1,IGSF3,KALRN,KDM5B,KLHL5,KMT2C,KMT2D,KMT5A,LAMA5,LRPPRC,LRRC14,LTBP1,MAPT,MDGA2,MTIF3,MUC16,MYO10,MYT1L,NAALAD2,NCKAP5,NCKAP5L,NEB,NINL,NOTCH…	108
Diseases and Disorders	Cancer,Neurological Disease,Organismal Injury and Abnormalities	glioma	Grade 2-3 glioma	1.03e-10	7.17e-09	ABCA2,AKAP9,ANK3,ARL8B,ARVCF,ASH1L,ASTN2,BBX,BIRC6,C10orf67,C1QL4,CACNA1D,CACNA2D3,CALN1,CCDC71,CCDC85A,CDC45,CDKN1A,CELSR3,CENPJ,CEP128,CHST5,CKB,CLCN2,CNTNAP5,COL5A1,COL6A3,CORO7/CORO7-PAM16,CPNE5,CSGALNACT2,DCAF12,DCAF4L1,DDN,DGKQ,DHDDS,DHX57,DLC1,DNAH1,DNAH10,DNAH5,DYSF,EGFR,EP300,ERRFI1,FBN3,FLG,FMNL3,FPR2,FSCB,GEM,GPR149,GPR37,GPR89A/GPR89B,GRIN2A,GRK4,GTF2IRD1,HIRA,HTRA3,HYKK,ICE1,IFIH1,IG…	148
Diseases and Disorders	Cancer,Organismal Injury and Abnormalities	adenosquamous carcinoma	Adenosquamous carcinoma	1.08e-10	7.49e-09	ABCB9,ABCF2,ADCY2,AFF3,ANKRD34C,ARHGEF33,ASH1L,ATP5IF1,CACNA2D3,CAPN6,CD47,CDKN1A,CEP128,CNTNAP2,CNTNAP5,COL4A2,COL5A1,COL6A3,COL6A6,COMT,CSMD1,CSMD3,DCAF1,DIO2,DNAH11,DNAH5,DPP4,DPP6,DYNC2H1,EDC4,EFL1,EGFR,FBN2,FBXO10,FLG,FPR2,HRH2,HSP90AA1,HYKK,IGSF10,IGSF3,INO80D,KCNH5,KMT2C,LAMA5,LAPTM5,LINGO1,LOXL1,LRPPRC,LY75,LY75-CD302,MANBA,MCRS1,MGAM,MTUS2,MUC16,MYO10,MYT1L,NCKAP5L,NRXN1,OAS3,OBSCN,ODF2L…	98
Diseases and Disorders	Neurological Disease,Organismal Injury and Abnormalities	epilepsy or neurodevelopmental disorder	Epilepsy or neurodevelopmental disorder	1.12e-10	7.73e-09	ABCC1,ADM,ALDH7A1,ALPK3,AP3B2,ATN1,BAZ2B,CACNA1I,CACNA2D3,CDKN1A,CEP85L,CHGB,CHRNA7,CLCN2,CNTNAP2,DCC,DGCR8,DRD2,DUSP6,DYNC2H1,EP300,ERRFI1,ESR1,FOXP1,GABRA2,GABRB3,GABRG1,GRIN2A,GUF1,HCN1,HCN4,HRH2,HS2ST1,KCNC3,KCNH5,KCNJ11,KCNK1,KMT2C,KMT2D,LINGO1,LZTR1,MDH1,ME2,MED15,MTRFR,MYT1L,NLGN3,NLGN4X,NPRL2,NR4A2,NRXN1,NSD1,NSF,OAS3,OPA1,OPRD1,OPRK1,OPRM1,PCDH12,PCDHAC1,PHOX2B,POLG,PPIL1,PROKR2,RBFOX1,R…	84
Diseases and Disorders	Cancer,Organismal Injury and Abnormalities	mixed cell carcinoma	Mixed cell carcinoma	1.13e-10	7.8e-09	ABCB9,ABCF2,ADCY2,AFF3,ANKRD34C,ARHGEF33,ASH1L,ATP5IF1,CACNA2D3,CAPN6,CD47,CDKN1A,CEP128,CNTNAP2,CNTNAP5,COL4A2,COL5A1,COL6A3,COL6A6,COMT,CSMD1,CSMD3,DCAF1,DIO2,DNAH11,DNAH5,DPP4,DPP6,DYNC2H1,EDC4,EFL1,EGFR,FBN2,FBXO10,FLG,FLT3,FPR2,HRH2,HSP90AA1,HYKK,IGSF10,IGSF3,INO80D,KCNH5,KMT2C,LAMA5,LAPTM5,LINGO1,LOXL1,LRPPRC,LY75,LY75-CD302,MANBA,MCRS1,MGAM,MTUS2,MUC16,MYO10,MYT1L,NCKAP5L,NRXN1,OAS3,OBSCN,…	101
Diseases and Disorders	Cancer,Hematological Disease,Immunological Disease,Organismal Injury and Abnormalities	lymphocytic cancer	Lymphocytic cancer	1.17e-10	7.99e-09	ABCA7,ABCC1,ABCC6,ADAMTS6,ADCY2,ADSL,AGBL4,AGRN,AIFM3,ANK3,ARHGAP26,ARHGEF3,ARHGEF33,ARVCF,ASH1L,ASTN2,ATN1,BAZ2B,BBX,BCL11A,BCL7A,BIRC6,CACNA1D,CACNA1I,CADPS2,CASP8,CCDC66,CD160,CD47,CDH23,CDH7,CDHR1,CDKN1A,CELSR3,CHST6,CLCA1,CLCA4,CNTN6,CNTNAP2,CNTNAP4,CNTNAP5,COL4A2,COL6A3,COMT,CPNE5,CRHR1,CRKL,CSGALNACT2,CSMD1,CSMD3,CXCL14,DAGLA,DAP,DCC,DGCR2,DHX57,DIABLO,DLC1,DNAH1,DNAH11,DNAH3,DNAH5,DNAH7,D…	235
Diseases and Disorders	Cancer,Hematological Disease,Organismal Injury and Abnormalities	malignant lymphocytic neoplasm	Malignant lymphocytic neoplasm	1.17e-10	7.99e-09	ABCA7,ABCC1,ABCC6,ADAMTS6,ADCY2,ADSL,AGBL4,AGRN,AIFM3,ANK3,ARHGAP26,ARHGEF3,ARHGEF33,ARVCF,ASH1L,ASTN2,ATN1,BAZ2B,BBX,BCL11A,BCL7A,BIRC6,CACNA1D,CACNA1I,CADPS2,CASP8,CCDC66,CD160,CD47,CDH23,CDH7,CDHR1,CDKN1A,CELSR3,CHST6,CLCA1,CLCA4,CNTN6,CNTNAP2,CNTNAP4,CNTNAP5,COL4A2,COL6A3,COMT,CPNE5,CRHR1,CRKL,CSGALNACT2,CSMD1,CSMD3,CXCL14,DAGLA,DAP,DCC,DGCR2,DHX57,DIABLO,DLC1,DNAH1,DNAH11,DNAH3,DNAH5,DNAH7,D…	235
Diseases and Disorders	Cancer,Organismal Injury and Abnormalities,Renal and Urological Disease	urinary tract tumor	Urinary tract tumor	1.22e-10	8.29e-09	ABCA2,ABCB9,ABCC1,ABCC6,ADAM23,ADAMTS6,ADCY2,ADM,AEBP1,AFF3,AKAP9,ALDH7A1,ALPK3,ARHGAP26,ASH1L,ATP5IF1,BHLHE40,BIRC6,BRPF3,BST1,CACNA1I,CACNA1S,CACNA2D3,CADM2,CADPS2,CALN1,CAPN6,CARF,CASP8,CCDC71,CD276,CDH23,CDH7,CDKN1A,CELSR3,CENPT,CEP128,CHRNA7,CHRNB4,CLCA1,CLCN2,CNTNAP2,COL6A3,COMT,CORO7/CORO7-PAM16,CPS1,CSMD1,CSMD3,CXXC4,DAGLA,DCC,DGCR6/LOC102724770,DGCR8,DHDDS,DLC1,DLX6,DNAH3,DNAH5,DNAH7,DNA…	239
Diseases and Disorders	Neurological Disease,Organismal Injury and Abnormalities	movement disorder	Movement Disorders	1.29e-10	8.72e-09	ABCA2,ADAM23,ADCY2,AEBP1,AGRN,AHCY,ANK3,ATN1,ATP5IF1,BCL7A,BHLHE40,CAB39,CACNA1D,CACNA1I,CACNA2D3,CASP8,CD160,CHGB,CHRNA7,CHRNB4,CKB,CLCN2,COL6A3,COMT,CPNE5,CTNNA3,CX3CL1,DAGLA,DBN1,DCC,DIO2,DNAJC13,DRD2,EEF2,EFL1,EPB41,EPHB2,ERRFI1,ESR1,FFAR3,FGF17,FOXP1,GABRA2,GABRB3,GABRG1,GAK,GPR37,GRIN2A,GTF3A,HDC,HEXB,HSP90AA1,ICA1,IFIH1,IMPA1,INO80D,IP6K2,KCNC3,KCNH7,KCNIP4,KCNJ11,KMT2C,LINGO1,MAPT,MDH1,ME…	130
Diseases and Disorders	Cancer,Organismal Injury and Abnormalities,Reproductive System Disease	breast adenocarcinoma	Breast adenocarcinoma	1.39e-10	9.35e-09	ADAM23,ADCY2,ALPK3,ARF3,ASH1L,ATP5IF1,BMS1,CAB39,CACNA1S,CASP8,CBR4,CD276,CDKN1A,CELSR3,CLCA2,CNTN6,COL4A2,COL6A3,CSMD1,CSMD3,CXCL14,DCC,DNAH11,DNAH3,DNAH5,DPP4,DPP6,EEF2,EGFR,EP300,EPHB2,ERCC5,ESR1,FARP2,FBN2,FLT3,FN1,FOXP1,GAK,GRIN2A,GRK4,HAUS3,HPD,HSP90AA1,ICE1,IL31,KALRN,KIRREL1,KMT2C,KMT2D,KMT5A,LIMCH1,LINGO1,LTBP1,MAP1LC3B,MAP3K4,MAP3K6,MAPK3,MAPT,MINAR1,MPL,MUC16,NAALAD2,NFE2L3,NOTCH1,NOTC…	113
Physiological System Development and Function	Nervous System Development and Function	morphology	Morphology of nervous system	1.42e-10	9.54e-09	ABCA2,ABI2,AGRN,ANK3,ATN1,CACNA1D,CACNA2D3,CADPS2,CASP8,CCDC134,CD47,CDH23,CDKN1A,CELSR3,CHRNA7,CKB,CLCN2,CNTN6,CNTNAP2,CPT1C,CRHR1,CRKL,CX3CL1,DAGLA,DBN1,DCC,DRD2,EFNA5,EGFR,EPHB2,ERC2,ESR1,FARP2,FFAR3,FGF17,GABRB3,GAK,GPR37,HDC,HEXB,HIRA,KALRN,KIDINS220,KLC1,LINGO1,LMO4,MANBA,MAPK3,MAPT,NCKIPSD,NEO1,NKX2-2,NLGN3,NOTCH1,NPAS3,NR1H2,NR4A2,NRCAM,PARK7,PCM1,PEX11B,PEX2,PHOX2B,POLG,POSTN,POU3F2,POU4…	107
Diseases and Disorders	Cancer,Gastrointestinal Disease,Organismal Injury and Abnormalities	oral squamous cell carcinoma	Oral squamous cell carcinoma	1.64e-10	1.1e-08	ABCA2,ABCC1,ADAMTS6,AKAP9,ARHGAP26,ARVCF,ASPN,ATN1,BAZ2B,BCL11A,BIRC6,BMS1,BRPF3,CACNA1D,CADPS2,CASP8,CCDC134,CD276,CDK2AP1,CEP128,CEP85L,COL4A2,COL5A1,CSMD1,CSMD3,CXCL14,CXXC4,DNAJC13,DOK3,DPCD,DPP4,DYNC2H1,DYSF,EFL1,EFNA5,EGFR,EP300,FAM184A,FBXO10,FIP1L1,FN1,GPRIN1,HGSNAT,HSP90AA1,HTRA3,IGIP,IGSF3,INO80D,KDM5B,KIDINS220,KIF20B,KMT2D,LRPPRC,LY75,ME2,MGAM,MPHOSPH9,MPRIP,MRC1,MUC16,NCL,NEB,NEO1,NL…	112
Diseases and Disorders	Cancer,Gastrointestinal Disease,Organismal Injury and Abnormalities	oral cavity carcinoma	Oral cavity carcinoma	1.76e-10	1.18e-08	ABCA2,ABCC1,ADAMTS6,ADSL,AKAP9,ARHGAP26,ARVCF,ASPN,ATN1,BAZ2B,BCL11A,BIRC6,BMS1,BRPF3,CACNA1D,CADPS2,CASP8,CCDC134,CCDC85A,CD276,CDK2AP1,CEP128,CEP85L,COL4A2,COL5A1,CSMD1,CSMD3,CXCL14,CXXC4,DNAJC13,DOK3,DPCD,DPP4,DYNC2H1,DYSF,EFL1,EFNA5,EGFR,EP300,FAM184A,FBXO10,FHIT,FIP1L1,FN1,GPRIN1,HGSNAT,HSP90AA1,HTRA3,IGIP,IGSF3,INO80D,KDM5B,KIDINS220,KIF20B,KMT2D,LRPPRC,LY75,ME2,MGAM,MPHOSPH9,MPRIP,MRC1,MUC…	116
Physiological System Development and Function	Embryonic Development,Organismal Development	development	Development of head	1.98e-10	1.32e-08	ABCC6,ABI2,ANK3,AQP5,ASPN,CCDC134,CCDC66,CDH23,CDHR1,CDK2AP1,CDKN1A,CHST6,CLCN2,CLDN5,CNTNAP2,COL5A1,COL8A1,CRKL,CX3CL1,CXCL14,DIO2,DLC1,DLX6,DNAH5,DPCD,DRD2,DYNC2H1,EFNA5,EGFR,EP300,EPHB2,ERC2,FGF17,FN1,GABRA2,GABRB3,GABRG1,GAK,HCN1,HEXB,HIRA,HS2ST1,IGSF3,IMMP2L,ITGB6,LAMA5,LMO4,LOXL1,MAPK3,MAPT,MPV17,MRTFA,MYO10,MYT1L,NEO1,NIPBL,NKX2-2,NLGN4X,NOTCH1,NOTCH2NLA/NOTCH2NLB,NPAS3,NR1H2,NR4A2,NRCAM,N…	108
Diseases and Disorders	Cancer,Neurological Disease,Organismal Injury and Abnormalities	oligodendroglioma	Oligodendroglioma	2.69e-10	1.78e-08	ABCA2,AKAP9,ANK3,ARL8B,ARVCF,ASH1L,ASTN2,BBX,BIRC6,C10orf67,C1QL4,CACNA1D,CACNA2D3,CALN1,CCDC71,CCDC85A,CDC45,CELSR3,CENPJ,CEP128,CHST5,CKB,CLCN2,CNTNAP5,COL5A1,COL6A3,CORO7/CORO7-PAM16,CPNE5,CSGALNACT2,DCAF12,DCAF4L1,DDN,DGKQ,DHDDS,DHX57,DLC1,DNAH1,DNAH10,DNAH5,DYSF,EGFR,EP300,ERRFI1,FBN3,FLG,FMNL3,FPR2,GEM,GPR149,GPR37,GPR89A/GPR89B,GRIN2A,GRK4,GTF2IRD1,HIRA,HTRA3,HYKK,ICE1,IFIH1,IGSF10,IGSF3,K…	146
Diseases and Disorders	Cancer,Gastrointestinal Disease,Organismal Injury and Abnormalities	oral cancer	Oral cancer	2.9e-10	1.91e-08	ABCA2,ABCC1,ADAMTS6,ADSL,AKAP9,ARHGAP26,ARVCF,ASPN,ATN1,BAZ2B,BCL11A,BIRC6,BMS1,BRPF3,CACNA1D,CADPS2,CASP8,CCDC134,CCDC85A,CD276,CDK2AP1,CEP128,CEP85L,COL4A2,COL5A1,CSMD1,CSMD3,CXCL14,CXXC4,DNAJC13,DOK3,DPCD,DPP4,DYNC2H1,DYSF,EFL1,EFNA5,EGFR,EP300,FAM184A,FBXO10,FHIT,FIP1L1,FN1,GPRIN1,HGSNAT,HSP90AA1,HTRA3,IGIP,IGSF3,INO80D,KDM5B,KIDINS220,KIF20B,KMT2D,LRPPRC,LY75,ME2,MGAM,MPHOSPH9,MPRIP,MRC1,MUC…	117
Physiological System Development and Function	Nervous System Development and Function,Organismal Development,Tissue Development	morphogenesis	Morphogenesis of nervous tissue	2.97e-10	1.95e-08	ABI2,ACTR3,AGRN,ANK3,CAMK1D,CD47,CDKN1A,CHRNA7,CKB,CNTNAP2,CPT1C,CRHR1,CRKL,CSMD3,DBN1,DCC,DRD2,EFNA5,EGFR,EPHB2,ERC2,FARP2,GABRB3,GEM,GPR37,GPRIN1,HRH2,HSP90AA1,IGF2BP1,KALRN,KIDINS220,KIF20B,LINGO1,MAPK3,MAPT,MRTFA,MYO10,NEO1,NLGN3,NOTCH1,NRCAM,NRXN1,OPA1,OPRM1,PKP4,POU3F2,POU4F2,POU4F3,PREX1,PRMT1,PTBP2,RELN,RERE,RICTOR,RIMS1,ROBO3,RTN4R,SEMA3E,SH3GLB1,SHANK2,SLITRK1,SULT4A1,TENM4,TNIK,TNN,TOR…	76
Molecular and Cellular Functions | Physiological System Development and Function	Cellular Development,Cellular Growth and Proliferation,Nervous System Development and Function,Tissue Development	development	Development of neurons	3.07e-10	2e-08	ABI2,ACTR3,AGRN,ANK3,CACNA1S,CADPS2,CAMK1D,CD47,CDKN1A,CHRNA7,CKB,CNTNAP2,CPT1C,CRHR1,CRKL,CSMD3,CX3CL1,DAGLA,DBN1,DCC,DRD2,EFNA5,EGFR,EPHB2,ERC2,FARP2,GABRB3,GEM,GPR37,GPRIN1,HCN1,HRH2,HSP90AA1,IGF2BP1,KALRN,KIDINS220,KIF20B,LINGO1,MAPK3,MAPT,MRTFA,MYO10,MYT1L,NEGR1,NEO1,NKX2-2,NLGN3,NOTCH1,NR4A2,NRCAM,NRXN1,OPA1,OPRM1,P2RX2,PCDHB13,PHOX2B,PKP4,POU3F2,POU4F2,POU4F3,PREX1,PRMT1,PRPH,PTBP2,RELN,RE…	92
Molecular and Cellular Functions | Physiological System Development and Function	Cell Morphology,Cellular Assembly and Organization,Cellular Development,Cellular Function and Maintenance,Cellular Growth and Proliferation,Nervous System Development and Function,Organismal Development,Tissue Development	neuritogenesis	Neuritogenesis	3.12e-10	2.03e-08	ABI2,ACTR3,AGRN,ANK3,CAMK1D,CD47,CDKN1A,CHRNA7,CKB,CNTNAP2,CPT1C,CRHR1,CRKL,CSMD3,DBN1,DCC,DRD2,EFNA5,EGFR,EPHB2,ERC2,FARP2,GABRB3,GEM,GPR37,GPRIN1,HRH2,HSP90AA1,IGF2BP1,KALRN,KIDINS220,KIF20B,LINGO1,MAPK3,MAPT,MRTFA,MYO10,NEO1,NLGN3,NOTCH1,NRCAM,OPA1,OPRM1,PKP4,POU3F2,POU4F2,POU4F3,PREX1,PRMT1,PTBP2,RELN,RERE,RICTOR,RIMS1,ROBO3,RTN4R,SEMA3E,SH3GLB1,SHANK2,SLITRK1,SULT4A1,TENM4,TNIK,TNN,TOR1A,TRI…	75
Molecular and Cellular Functions | Physiological System Development and Function	Cellular Movement,Nervous System Development and Function	migration	Migration of neurons	3.26e-10	2.11e-08	CADPS2,CDH23,CELSR3,CEP85L,CNTNAP2,CRKL,CX3CL1,DBN1,DCC,DGCR8,DRD2,EFNA5,EPHB2,ERRFI1,FN1,HSP90AA1,KIF20B,LMO4,MAPT,MDGA2,MRTFA,NEO1,NR4A2,PCM1,PEX11B,PEX2,PHOX2B,POU3F2,POU4F3,PREX1,RELN,RERE,ROBO3,SDC3,TBR1,TNN,TRIO,TUBA1A	38
Diseases and Disorders	Cancer,Neurological Disease,Organismal Injury and Abnormalities	brain oligodendroglioma	Brain oligodendroglioma	3.46e-10	2.23e-08	ABCA2,AKAP9,ANK3,ARL8B,ARVCF,ASH1L,ASTN2,BBX,BIRC6,C10orf67,C1QL4,CACNA1D,CACNA2D3,CALN1,CCDC71,CCDC85A,CDC45,CELSR3,CENPJ,CEP128,CHST5,CKB,CLCN2,CNTNAP5,COL5A1,COL6A3,CORO7/CORO7-PAM16,CPNE5,CSGALNACT2,DCAF12,DCAF4L1,DDN,DGKQ,DHDDS,DHX57,DLC1,DNAH1,DNAH10,DNAH5,DYSF,EGFR,EP300,ERRFI1,FBN3,FLG,FMNL3,FPR2,GEM,GPR149,GPR37,GPR89A/GPR89B,GRIN2A,GRK4,GTF2IRD1,HIRA,HTRA3,HYKK,ICE1,IFIH1,IGSF10,IGSF3,K…	142
Diseases and Disorders	Cancer,Endocrine System Disorders,Organismal Injury and Abnormalities,Reproductive System Disease	gonadal tumor	Gonadal tumor	3.77e-10	2.42e-08	ABCB9,ABCF2,ADCY2,AEBP1,AFF3,AGBL4,AKAP9,ALDH7A1,AMH,ANKRD34C,ARHGEF33,ASB3/GPR75-ASB3,ASH1L,BNC1,BRPF3,CACNA2D3,CADPS2,CAPN6,CASP8,CD47,CDH23,CDHR1,CDKN1A,CDX2,CELSR3,CEP128,CLCA1,CLTCL1,CNTNAP2,CNTNAP5,COL4A2,COL5A1,COL6A3,COL6A6,COMT,CPS1,CRKL,CSMD1,CSMD3,CXCL14,DCAF1,DIO2,DNAH11,DNAH3,DNAH5,DNAH7,DPP4,DPP6,DYNC2H1,EDC4,EFL1,EGFR,ENO1,EP300,ESR1,EXOC3L4,FAM153A/FAM153B,FBN2,FBN3,FBXO10,FLG,FLT…	174
Physiological System Development and Function	Embryonic Development,Organismal Development	development	Development of body axis	4.16e-10	2.66e-08	ABCC6,ABI2,ANK3,AQP5,ASPN,CCDC134,CCDC66,CDH23,CDHR1,CDK2AP1,CDKN1A,CDX2,CENPJ,CHST6,CLCN2,CLDN5,CNTNAP2,COL5A1,COL8A1,CRKL,CX3CL1,CXCL14,DIO2,DLC1,DLX6,DNAH11,DNAH5,DPCD,DRD2,DYNC2H1,EFNA5,EGFR,EP300,EPHB2,ERC2,FGF17,FN1,GABRA2,GABRB3,GABRG1,GAK,HCN1,HEXB,HIRA,HOXB4,HS2ST1,IGSF3,IMMP2L,ITGB6,LAMA5,LMO4,LOXL1,MAPK3,MAPT,MPV17,MRTFA,MYO10,MYT1L,NEO1,NIPBL,NKX2-2,NLGN4X,NOTCH1,NOTCH2NLA/NOTCH2NLB,N…	112
Diseases and Disorders	Cancer,Neurological Disease,Organismal Injury and Abnormalities	malignant glioma	Grade 3 malignant glioma	4.32e-10	2.75e-08	ABCA2,AKAP9,ANK3,ARL8B,ARVCF,ASH1L,ASTN2,BBX,BIRC6,C10orf67,C1QL4,CACNA1D,CACNA2D3,CALN1,CCDC71,CCDC85A,CDC45,CELSR3,CENPJ,CEP128,CHST5,CKB,CLCN2,CNTNAP5,COL5A1,COL6A3,CORO7/CORO7-PAM16,CPNE5,CSGALNACT2,DCAF12,DCAF4L1,DDN,DGKQ,DHDDS,DHX57,DLC1,DNAH1,DNAH10,DNAH5,DYSF,EGFR,EP300,ERRFI1,FBN3,FLG,FMNL3,FPR2,GEM,GPR149,GPR37,GPR89A/GPR89B,GRIN2A,GRK4,GTF2IRD1,HIRA,HTRA3,HYKK,ICE1,IFIH1,IGSF10,IGSF3,K…	143
Diseases and Disorders	Cancer,Dermatological Diseases and Conditions,Organismal Injury and Abnormalities	non-melanoma skin cancer	Non-melanoma skin cancer	4.33e-10	2.75e-08	ABCA2,AFF3,ANK3,ANKRD34C,BRPF3,CACNA1D,CACNA1S,CADM2,CADPS2,CASP8,CDH23,CDH7,CHST6,CNTN6,CNTNAP2,CNTNAP4,CNTNAP5,COL4A2,COL6A3,CSMD1,CSMD3,CTNNA3,DAGLA,DCC,DLC1,DNAH10,DNAH5,DNAH7,DPP6,DYSF,EGFR,FBN2,FLG,FLT3,FSCB,GABRB3,GTF2IRD1,HCN1,HIRA,KALRN,KCNH5,KCNH7,KDM5B,KIF26B,KMT2D,LMBR1L,LMO4,LZTR1,MCHR2,MDGA2,MUC16,MYT1L,NAALAD2,NCKAP5L,NDUFA13,NOTCH1,OBSCN,OPRM1,PCDH11X,PCDHAC1,PCDHGA2,PDCD1,PDE9A,P…	86
Diseases and Disorders	Cancer,Dermatological Diseases and Conditions,Organismal Injury and Abnormalities	squamous cell skin cancer	Skin squamous cell carcinoma	4.47e-10	2.83e-08	ABCA2,AFF3,ANK3,ANKRD34C,BRPF3,CACNA1D,CACNA1S,CADM2,CADPS2,CASP8,CDH23,CDH7,CHST6,CNTN6,CNTNAP2,CNTNAP4,CNTNAP5,COL4A2,COL6A3,CSMD1,CSMD3,CTNNA3,DAGLA,DCC,DLC1,DNAH10,DNAH5,DNAH7,DPP6,DYSF,EGFR,FBN2,FLG,FLT3,FSCB,GABRB3,GTF2IRD1,HCN1,HIRA,KALRN,KCNH5,KCNH7,KDM5B,KIF26B,KMT2D,LMBR1L,LMO4,LZTR1,MCHR2,MDGA2,MUC16,MYT1L,NAALAD2,NCKAP5L,NDUFA13,NOTCH1,OBSCN,OPRM1,PCDH11X,PCDHAC1,PCDHGA2,PDCD1,PDE9A,P…	85
Molecular and Cellular Functions | Physiological System Development and Function	Cellular Development,Cellular Growth and Proliferation,Nervous System Development and Function,Tissue Development	development	Development of neural cells	4.61e-10	2.9e-08	ABI2,ACTR3,AGRN,ANK3,CACNA1S,CADPS2,CAMK1D,CD47,CDKN1A,CHRNA7,CKB,CNTNAP2,CPT1C,CRHR1,CRKL,CSMD3,CX3CL1,DAGLA,DBN1,DCC,DRD2,EFNA5,EGFR,EIF2B2,EPHB2,ERC2,FARP2,GABRB3,GEM,GPR37,GPRIN1,HCN1,HRH2,HSP90AA1,IGF2BP1,KALRN,KIDINS220,KIF20B,LINGO1,MAPK3,MAPT,MRTFA,MYO10,MYT1L,NEGR1,NEO1,NKX2-2,NLGN3,NOTCH1,NR4A2,NRCAM,NRXN1,NSUN5,OPA1,OPRM1,P2RX2,PCDHB13,PHOX2B,PKP4,POU3F2,POU4F2,POU4F3,PREX1,PRMT1,PRPH,…	95
Physiological System Development and Function	Nervous System Development and Function,Organ Morphology,Organismal Development	morphology	Morphology of brain	4.7e-10	2.94e-08	ABI2,ANK3,CADPS2,CASP8,CCDC134,CDKN1A,CELSR3,CHRNA7,CKB,CLCN2,CNTN6,CNTNAP2,CX3CL1,DBN1,DCC,EFNA5,EGFR,EPHB2,ESR1,FGF17,GABRB3,GAK,GPR37,HDC,HEXB,HIRA,KALRN,KIDINS220,MANBA,MAPT,NLGN3,NOTCH1,NPAS3,NR4A2,NRCAM,PARK7,PCM1,PEX11B,PEX2,POSTN,POU3F2,POU4F2,PROKR2,RELN,RICTOR,RIMS1,RTN4R,SERPINE2,SHANK2,SLC4A10,SLC6A4,SPAG17,TBR1,TCOF1,TENM2,TRIO,TUBA1A,UCHL1,VAMP7,WDR62,WNT1,WNT5A,WWC1,WWOX,XRCC6,ZBTB…	66
Diseases and Disorders	Cancer,Endocrine System Disorders,Organismal Injury and Abnormalities,Reproductive System Disease	mixed cell epithelial ovarian cancer	Mixed ovarian carcinoma	5.16e-10	3.23e-08	ABCB9,ABCF2,ADCY2,AFF3,ANKRD34C,ARHGEF33,ASH1L,CACNA2D3,CAPN6,CD47,CEP128,CNTNAP2,CNTNAP5,COL4A2,COL5A1,COL6A3,COL6A6,COMT,CSMD1,CSMD3,DCAF1,DIO2,DNAH11,DNAH5,DPP4,DPP6,DYNC2H1,EDC4,EFL1,FBN2,FBXO10,FLG,FPR2,HRH2,HSP90AA1,HYKK,IGSF10,IGSF3,INO80D,KCNH5,KMT2C,LAMA5,LAPTM5,LINGO1,LOXL1,LRPPRC,LY75,LY75-CD302,MANBA,MCRS1,MGAM,MTUS2,MUC16,MYO10,MYT1L,NCKAP5L,NRXN1,OAS3,OBSCN,ODF2L,PCDHGA2,PCDHGA9,PDC…	95
Diseases and Disorders	Developmental Disorder,Neurological Disease,Organismal Injury and Abnormalities	complex neurodevelopmental disorder	Complex neurodevelopmental disorder	5.63e-10	3.5e-08	CNTNAP2,DGCR8,DRD2,EP300,GRIN2A,HRH2,KMT2D,NLGN3,NLGN4X,NR4A2,NRXN1,RELN,RERE,SEMA3E,SHANK2,SLC6A2,SLC6A4,ST3GAL3,TBR1,TBX1	20
Diseases and Disorders	Neurological Disease,Organismal Injury and Abnormalities	neurological signs	Neurological signs	6.32e-10	3.91e-08	ADCY2,AEBP1,AHCY,ATN1,ATP5IF1,BCL7A,BHLHE40,CAB39,CACNA1D,CACNA2D3,CADPS2,CARF,CASP8,CD160,CHGB,CHRNA7,CHRNB4,CKB,COMT,CPNE5,CX3CL1,DBN1,DIO2,DRD2,EPB41,EPHB2,ESR1,FFAR3,FOXP1,GABRA2,GABRB3,GABRG1,GPR37,GRIN2A,GTF3A,HSP90AA1,ICA1,IFIH1,IMPA1,INO80D,IP6K2,KALRN,KCNC3,KCNH3,KCNH7,KCNIP4,KCNJ11,KMT2C,LINGO1,MAPT,MPO,MPRIP,MYT1L,NDUFA13,NDUFA4,NDUFA6,NDUFB1,NFE2L3,NGEF,NRXN1,OPRD1,OPRK1,OPRM1,PCDH7,P…	94
Diseases and Disorders	Cancer,Endocrine System Disorders,Organismal Injury and Abnormalities,Reproductive System Disease	endometrioid ovarian cancer	Ovarian endometrioid carcinoma	7.4e-10	4.57e-08	ABCB9,ABCF2,ADCY2,AFF3,ANKRD34C,ARHGEF33,ASH1L,CACNA2D3,CAPN6,CD47,CEP128,CNTNAP2,CNTNAP5,COL4A2,COL5A1,COL6A3,COL6A6,COMT,CSMD1,CSMD3,DCAF1,DIO2,DNAH11,DNAH5,DPP4,DPP6,DYNC2H1,EDC4,EFL1,FBN2,FBXO10,FLG,FPR2,HRH2,HSP90AA1,HYKK,IGSF10,IGSF3,INO80D,KCNH5,KMT2C,LAMA5,LAPTM5,LINGO1,LOXL1,LRPPRC,LY75,LY75-CD302,MANBA,MCRS1,MGAM,MTUS2,MUC16,MYO10,MYT1L,NCKAP5L,NRXN1,OAS3,OBSCN,ODF2L,PCDHGA2,PCDHGA9,PDC…	96
Physiological System Development and Function	Nervous System Development and Function	morphology	Morphology of central nervous system	7.84e-10	4.82e-08	ABI2,ANK3,CADPS2,CASP8,CCDC134,CDKN1A,CELSR3,CHRNA7,CKB,CLCN2,CNTN6,CNTNAP2,CX3CL1,DBN1,DCC,EFNA5,EGFR,EPHB2,ESR1,FGF17,GABRB3,GAK,GPR37,HDC,HEXB,HIRA,KALRN,KIDINS220,MANBA,MAPT,NKX2-2,NLGN3,NOTCH1,NPAS3,NR1H2,NR4A2,NRCAM,PARK7,PCM1,PEX11B,PEX2,POSTN,POU3F2,POU4F2,PROKR2,RELN,RICTOR,RIMS1,RTN4R,SDC3,SERPINE2,SHANK2,SLC4A10,SLC6A4,SPAG17,TBR1,TCOF1,TENM2,TOR1A,TRIO,TUBA1A,UCHL1,VAMP7,WDR62,WNT1,WN…	70
Diseases and Disorders | Physiological System Development and Function	Organismal Injury and Abnormalities,Organismal Survival	organismal death	Organismal death	8.2e-10	5.02e-08	ABCA2,ABCC1,ADAM23,ADM,AEBP1,AGRN,AKAP9,ALDH7A1,ANK3,AQP5,ARL5A,ARL8B,ASPN,ATN1,BCL11A,BCL7A,BHLHE40,BIRC6,CACNA1D,CACNA1S,CACNA2D3,CADPS2,CASP8,CCDC134,CD276,CD47,CDC45,CDK2AP1,CDKN1A,CDX2,CELSR3,CENPJ,CHRNA7,CHRNB4,CKB,CLDN5,COL4A2,COL5A1,CPS1,CRHR1,CRKL,CSGALNACT2,CTNNA3,CXCL14,DCAF1,DCC,DGCR8,DLC1,DPP4,DPP6,DRD2,DYNC2H1,EFNA5,EGFR,ENO1,EP300,EPHB2,ERCC5,ERRFI1,ESR1,ETS1,FBN2,FHIT,FLT3,FN1,FPR…	220
Molecular and Cellular Functions | Physiological System Development and Function	Cell-To-Cell Signaling and Interaction,Nervous System Development and Function	neurotransmission	Neurotransmission	1.24e-09	7.57e-08	AGRN,AKAP9,AMH,ANK3,CACNA1D,CACNA1I,CACNA2D3,CD47,CHRNA7,CHRNB4,CNTNAP2,CRHR1,DPP6,DRD2,EPB41,EPHB2,ERC2,GABRG1,GRIN2A,HCN1,HCN4,KALRN,KCNC3,KCNJ11,KCNMB3,MAPT,NLGN3,NRCAM,NRXN1,NSF,OPRK1,OPRM1,P2RX2,PARK7,PCDH17,PCDHB13,PDE4A,PNKD,PRKAR2A,RELN,RICTOR,RIMBP2,RIMS1,RTN4R,SCN5A,SERPINE2,SHANK2,SLC6A2,SLC6A4,SNAP29,STON2,UCHL1,UNC13C,WNT5A	54
Diseases and Disorders	Developmental Disorder,Neurological Disease,Organismal Injury and Abnormalities	neurodevelopmental disorder	Neurodevelopmental disorder	1.29e-09	7.85e-08	ADM,ALPK3,AP3B2,ATN1,BAZ2B,CEP85L,CNTNAP2,DCC,DGCR8,DRD2,DYNC2H1,EP300,ESR1,FOXP1,GABRA2,GABRB3,GRIN2A,GUF1,HCN1,HRH2,HS2ST1,KCNH5,KMT2C,KMT2D,LZTR1,MDH1,MED15,MTRFR,MYT1L,NLGN3,NLGN4X,NR4A2,NRXN1,NSD1,NSF,OAS3,OPA1,PCDH12,PCDHAC1,PHOX2B,PPIL1,PROKR2,RELN,RERE,SEMA3E,SHANK2,SLC6A2,SLC6A4,SOS1,ST3GAL3,TBR1,TBX1,TCF20,TUBA1A,WDR62,WWOX	56
Diseases and Disorders	Organismal Injury and Abnormalities,Psychological Disorders	schizophrenia or schizoaffective disorder	Schizophrenia or schizoaffective disorder	1.62e-09	9.81e-08	ANK3,CACNA1I,CACNA2D3,CADPS2,CHRNA7,CHRNB4,CNTN6,CNTNAP2,COMT,CSMD1,DGCR2,DNAH10,DPP6,DRD2,EGFR,ESR1,FHIT,GABRA2,GABRB3,GABRG1,GPR37,GRIN2A,GTF2IRD1,HRH2,KCNH7,KCNK1,KLC1,KMT2C,LMO4,LOC102724788/PRODH,MDH1,NDUFA6,NPAS3,NPRL2,NR4A2,NRXN1,NSF,OFCC1,OLFM1,OPRD1,OPRK1,OPRM1,PHOX2B,PMM1,POU3F2,RBFOX1,RELN,RGS12,RTN4R,SCN5A,SLC6A2,SLC6A4,SPRY2,SULT4A1,TENM4,THBS1,TNIK,TRAF3,VGF	59
Diseases and Disorders	Developmental Disorder,Neurological Disease,Organismal Injury and Abnormalities	nonspecific mental retardation	Nonspecific mental retardation	1.7e-09	1.03e-07	ALDH18A1,ALDH7A1,ANK3,ASH1L,BCL11A,CACNA1D,CHMP1A,CLCN2,CNTNAP2,COL9A2,CPS1,DNAH3,DPP6,DYNC2H1,EP300,FOXP1,GABRB3,GRIN2A,HCN1,HEXB,HGSNAT,KANSL1,KDM5B,KIDINS220,KMT2C,KMT2D,MYT1L,NIPBL,NLGN3,NLGN4X,NRXN1,NSD1,PHF3,POLD1,POLG,RELN,SHANK2,SOS1,ST3GAL3,TANC1,TBR1,TCF20,TMEM67,TRIO,WDR62,ZBTB20	46
Diseases and Disorders	Cancer,Organismal Injury and Abnormalities	lymphoreticular neoplasm	Lymphoreticular neoplasm	1.79e-09	1.07e-07	ABCA7,ABCB9,ABCC1,ABCC6,ABCG8,ADAMTS6,ADSL,AFF3,AGBL4,AGRN,AIFM3,AKAP9,ALDH7A1,ANK3,ARHGAP26,ARHGEF3,ARHGEF33,ASB3/GPR75-ASB3,ASH1L,ATN1,BAZ2B,BBX,BCL7A,BIRC6,CACNA1D,CADM2,CARF,CASP8,CD47,CDH7,CDHR1,CDKN1A,CELSR3,CENPT,CHGB,CLCA4,CLCN2,CNTN6,CNTNAP2,CNTNAP4,CNTNAP5,COL4A2,COL6A3,COL6A6,COMT,CPT1C,CRHR1,CRKL,CSMD1,CSMD3,CXCL14,DBN1,DCAF12,DCC,DIABLO,DLEC1,DNAH1,DNAH11,DNAH5,DNAH7,DOP1B,DPP4,DPP6,…	233
Diseases and Disorders	Developmental Disorder,Neurological Disease,Organismal Injury and Abnormalities	global developmental delay with intellectual disability	Global developmental delay with intellectual disability	1.86e-09	1.12e-07	CD160,CDC45,COA8,COMT,GP1BB,GPR89A/GPR89B,LOC102724788/PRODH,NIPA1,PDZK1,PI4KA,POLR3C,RIMS1,RTN4R,SCARF2,SERPIND1,TANGO2,TBX1,TRAF3,TUBGCP5	19
Diseases and Disorders	Cancer,Organismal Injury and Abnormalities	carcinosarcoma	Carcinosarcoma	3e-09	1.79e-07	ALKBH6,AP3B2,BNC1,CACNA1I,CHRNA7,CNTN6,CNTNAP2,CORO7/CORO7-PAM16,CSMD3,DBN1,DNAH3,DNAH5,DYNC2H1,EGFR,ESR1,FBN2,FBN3,FSCB,GABRA2,HIRA,HOXB4,HSP90AA1,KIDINS220,KMT2D,LAMA5,MAP3K4,MPL,MTUS2,MUC16,MUC6,MYT1L,NAPSA,NFE2L3,NINL,NOTCH1,NRXN1,PCDH11X,PCDHGA2,PCDHGA9,PDCD1,PHF14,PKN2,POLE,PRSS3,PTBP2,RANBP10,RP1L1,SCAPER,SELE,SEMA3E,SERINC2,SHANK2,SLC4A10,SLCO6A1,SOS1,TJP1,TNFAIP2,TNKS1BP1,TSHR,TTN,TUBA1A…	66
Molecular and Cellular Functions	Cellular Assembly and Organization,Cellular Function and Maintenance	organization	Organization of cytoplasm	3.38e-09	2.01e-07	ABCC1,ABI2,ACTR3,ADM,AGRN,AKAP9,ANK3,AQP5,BAG5,BST1,CACNA1S,CAMK1D,CAMKMT,CAPN6,CCDC66,CD47,CDKN1A,CELSR3,CENPJ,CHRNA7,CIBAR1,CKB,CNTNAP2,COMT,CORO7/CORO7-PAM16,CPT1C,CRHR1,CRKL,CSMD3,DBN1,DCC,DLC1,DNAH5,DNAJC13,DOP1B,DRD2,DYNC2H1,DYNC2I1,EFNA5,EGFR,EIF2B2,EP300,EPB41,EPHB2,ERC2,ESR1,ETS1,FARP2,FHIT,FHL2,FMNL3,FN1,GABPB1,GABRB3,GAK,GEM,GPR37,GPRIN1,GRK4,HEXB,HRH2,HSP90AA1,IGF2BP1,KALRN,KIDINS220,…	148
Diseases and Disorders	Neurological Disease,Organismal Injury and Abnormalities,Psychological Disorders	disorder of basal ganglia	Disorder of basal ganglia	4.7e-09	2.79e-07	ADCY2,AEBP1,AHCY,ATN1,ATP5IF1,BCL7A,BHLHE40,CAB39,CACNA1D,CACNA2D3,CASP8,CD160,CELSR3,CHGB,CHRNA7,CKB,COMT,CPNE5,CTNNA3,CX3CL1,DBN1,DIO2,DNAJC13,DRD2,EPB41,EPHB2,FFAR3,FOXP1,GABRA2,GABRB3,GABRG1,GAK,GPR37,GRIN2A,GTF3A,HDC,HSP90AA1,ICA1,IFIH1,IMPA1,INO80D,IP6K2,KCNH7,KCNIP4,LINGO1,MAPT,MDH1,MECR,MPRIP,MYT1L,NDUFA13,NDUFA4,NDUFA6,NDUFB1,NFE2L3,NGEF,NR4A2,NRXN1,OPRD1,OPRK1,OPRM1,PARK7,PCDH7,PDE4A,PD…	95
Diseases and Disorders	Cancer,Endocrine System Disorders,Organismal Injury and Abnormalities,Reproductive System Disease	adenosquamous ovarian cancer	Adenosquamous ovarian carcinoma	5.5e-09	3.25e-07	ABCB9,ABCF2,ADCY2,AFF3,ANKRD34C,ARHGEF33,ASH1L,CACNA2D3,CAPN6,CD47,CEP128,CNTNAP2,CNTNAP5,COL4A2,COL5A1,COL6A3,COL6A6,COMT,CSMD1,CSMD3,DCAF1,DIO2,DNAH11,DNAH5,DPP4,DPP6,DYNC2H1,EDC4,EFL1,FBN2,FBXO10,FLG,FPR2,HRH2,HYKK,IGSF10,IGSF3,INO80D,KCNH5,KMT2C,LAMA5,LAPTM5,LINGO1,LOXL1,LRPPRC,LY75,LY75-CD302,MANBA,MCRS1,MGAM,MTUS2,MUC16,MYO10,MYT1L,NCKAP5L,NRXN1,OAS3,OBSCN,ODF2L,PCDHGA2,PCDHGA9,PIWIL1,POU4F…	90
Diseases and Disorders	Organismal Injury and Abnormalities,Psychological Disorders	psychological disorder	Severe psychological disorder	6.69e-09	3.93e-07	ADCY2,AHCY,ANK3,CACNA1I,CACNA2D3,CADPS2,CAPN6,CD47,CHRNA7,CHRNB4,CNTN6,CNTNAP2,COMT,CSMD1,DGCR2,DIABLO,DNAH10,DPP6,DRD2,EGFR,ESR1,FAM153A/FAM153B,FHIT,GABRA2,GABRB3,GABRG1,GPR37,GRIN2A,GTF2IRD1,HRH2,KCNH7,KCNK1,KLC1,KMT2C,LMO4,LOC102724788/PRODH,MAPT,MDH1,MRPL3,NDUFA6,NPAS3,NPRL2,NR4A2,NRXN1,NSF,OFCC1,OLFM1,OPRD1,OPRK1,OPRM1,PDE4A,PDE9A,PHOX2B,PMM1,POU3F2,PSKH1,PTPRU,RBFOX1,RCAN1,RELN,RGS12,RIMS1…	77
Diseases and Disorders	Neurological Disease,Organismal Injury and Abnormalities,Psychological Disorders	schizophrenia	Schizophrenia	7.47e-09	4.37e-07	ANK3,CACNA1I,CACNA2D3,CADPS2,CHRNA7,CHRNB4,CNTN6,COMT,CSMD1,DGCR2,DNAH10,DPP6,DRD2,EGFR,ESR1,FHIT,GABRA2,GABRB3,GABRG1,GPR37,GRIN2A,GTF2IRD1,HRH2,KCNH7,KCNK1,KLC1,KMT2C,LMO4,LOC102724788/PRODH,MDH1,NDUFA6,NPAS3,NPRL2,NR4A2,NRXN1,NSF,OFCC1,OLFM1,OPRD1,OPRK1,OPRM1,PHOX2B,PMM1,POU3F2,RBFOX1,RELN,RTN4R,SCN5A,SLC6A2,SLC6A4,SPRY2,SULT4A1,TENM4,THBS1,TNIK,TRAF3,VGF	57
Diseases and Disorders	Neurological Disease,Organismal Injury and Abnormalities,Skeletal and Muscular Disorders	neuromuscular disease	Neuromuscular disease	7.67e-09	4.48e-07	ADCY2,AEBP1,AHCY,ATP5IF1,BCL7A,BEND4,BHLHE40,CAB39,CACNA1D,CACNA2D3,CASP8,CD160,CD47,CHGB,CHRNA7,CKB,COMT,CPNE5,CTNNA3,CX3CL1,DBN1,DIO2,DNAJC13,DRD2,EPB41,EPHB2,EPSTI1,ESR1,FFAR3,FHIT,FOXP1,GABRA2,GABRB3,GABRG1,GAK,GFM2,GPR37,GRIN2A,GTF3A,HRH2,HSP90AA1,ICA1,IFIH1,IMPA1,INO80D,IP6K2,KCNC3,KCNH7,KCNIP4,LINGO1,LRPPRC,MAPT,MDH1,MECR,MPRIP,MPV17,MRPL3,MTRFR,MYT1L,NARS2,NDUFA13,NDUFA4,NDUFA6,NDUFB1,NFE…	110
Molecular and Cellular Functions	Cellular Assembly and Organization,Cellular Function and Maintenance	organization	Organization of cytoskeleton	7.83e-09	4.55e-07	ABCC1,ABI2,ACTR3,ADM,AGRN,AKAP9,ANK3,AQP5,BST1,CAMK1D,CAPN6,CCDC66,CD47,CDKN1A,CELSR3,CENPJ,CHRNA7,CIBAR1,CKB,CNTNAP2,COMT,CORO7/CORO7-PAM16,CPT1C,CRHR1,CRKL,CSMD3,DBN1,DCC,DLC1,DNAH5,DRD2,DYNC2H1,DYNC2I1,EFNA5,EGFR,EIF2B2,EP300,EPB41,EPHB2,ERC2,ESR1,ETS1,FARP2,FHIT,FHL2,FMNL3,FN1,GABRB3,GEM,GPR37,GPRIN1,GRK4,HRH2,HSP90AA1,IGF2BP1,KALRN,KIDINS220,KIF20B,KIF24,KIRREL1,KLC1,LAMA5,LINGO1,MAPK3,MAPT,…	136
Diseases and Disorders	Developmental Disorder,Hereditary Disorder,Neurological Disease,Organismal Injury and Abnormalities,Psychological Disorders	susceptibility to autism type 1	Susceptibility to autism type 1	8.39e-09	4.86e-07	ANK3,ASTN2,CNTN6,CNTNAP2,CSMD1,DNAH7,FHIT,FOXP1,NINL,NLGN4X,RBFOX1,RELN,SHANK2	13
Diseases and Disorders	Developmental Disorder,Hereditary Disorder,Neurological Disease,Organismal Injury and Abnormalities	familial neurodevelopmental disorder	Familial neurodevelopmental disorder	8.83e-09	5.1e-07	ADM,ALPK3,AP3B2,ATN1,CEP85L,CNTNAP2,DCC,DGCR8,DRD2,DYNC2H1,EP300,FOXP1,GABRA2,GABRB3,GRIN2A,GUF1,HCN1,HRH2,HS2ST1,KCNH5,KMT2C,KMT2D,LZTR1,MTRFR,MYT1L,NR4A2,NRXN1,NSD1,NSF,OPA1,PCDH12,PCDHAC1,PHOX2B,PROKR2,RERE,SEMA3E,SLC6A2,SLC6A4,SOS1,ST3GAL3,TBR1,TBX1,TCF20,TUBA1A,WDR62,WWOX	46
Diseases and Disorders	Cancer,Organismal Injury and Abnormalities,Reproductive System Disease	ductal breast cancer	Ductal breast carcinoma	9.94e-09	5.72e-07	ADAM23,ADCY2,ALPK3,ASH1L,ATP5IF1,BMS1,CAB39,CACNA1S,CASP8,CBR4,CDKN1A,CNTN6,COL4A2,COL6A3,CSMD1,CSMD3,CXCL14,DCC,DNAH11,DNAH3,DNAH5,DPP4,EEF2,EGFR,EP300,EPHB2,ERCC5,ESR1,FARP2,FBN2,FLT3,FN1,FOXP1,GAK,GRK4,HAUS3,HPD,HSP90AA1,IL31,KALRN,KIRREL1,KMT2C,KMT2D,KMT5A,LINGO1,LTBP1,MAP1LC3B,MAP3K4,MAP3K6,MAPK3,MAPT,MPL,MUC16,NAALAD2,NOTCH1,NSD1,NSD3,OBSCN,PARK7,PCDH17,PCDHGA2,PDCD1,PHF2,PIAS3,PIKFYVE,PIM1…	94
Molecular and Cellular Functions	Cellular Assembly and Organization,Cellular Function and Maintenance	organization	Microtubule dynamics	1.06e-08	6.08e-07	ABCC1,ABI2,ACTR3,ADM,AGRN,AKAP9,ANK3,AQP5,CAMK1D,CCDC66,CD47,CDKN1A,CELSR3,CENPJ,CHRNA7,CIBAR1,CKB,CNTNAP2,COMT,CPT1C,CRHR1,CRKL,CSMD3,DBN1,DCC,DNAH5,DRD2,DYNC2H1,DYNC2I1,EFNA5,EGFR,EIF2B2,EP300,EPB41,EPHB2,ERC2,ESR1,FARP2,FHIT,FN1,GABRB3,GEM,GPR37,GPRIN1,GRK4,HRH2,HSP90AA1,IGF2BP1,KALRN,KIDINS220,KIF20B,KIF24,KLC1,LAMA5,LINGO1,MAPK3,MAPT,MPRIP,MRTFA,MTUS2,MYO10,NCKAP5L,NCKIPSD,NEO1,NINL,NLGN3,NO…	121
Diseases and Disorders	Developmental Disorder,Hereditary Disorder,Neurological Disease,Organismal Injury and Abnormalities,Psychological Disorders	familial pervasive developmental disorder	Familial pervasive developmental disorder	1.22e-08	6.95e-07	ANK3,ASTN2,CADPS2,CNTN6,CNTNAP2,CSMD1,DNAH7,FHIT,FOXP1,GABRB3,LZTR1,NINL,NLGN3,NLGN4X,NRXN1,RBFOX1,RELN,SHANK2	18
Diseases and Disorders	Cancer,Organismal Injury and Abnormalities	malignant neoplasm of connective or soft tissue of pelvis	Malignant neoplasm of connective or soft tissue of pelvis	1.32e-08	7.5e-07	ALKBH6,AP3B2,BNC1,CACNA1I,CHRNA7,CNTN6,CNTNAP2,CORO7/CORO7-PAM16,CSMD3,DBN1,DNAH3,DNAH5,DYNC2H1,ESR1,FBN2,FBN3,FSCB,GABRA2,HIRA,HOXB4,HSP90AA1,KIDINS220,KMT2C,KMT2D,LAMA5,MAP3K4,MTUS2,MUC16,MUC6,MYT1L,NAPSA,NFE2L3,NINL,NOTCH1,NRXN1,PCDH11X,PCDHGA2,PCDHGA9,PDCD1,PHF14,PKN2,POLE,PRSS3,PTBP2,RANBP10,RERE,RP1L1,RRM1,SCAPER,SELE,SEMA3E,SERINC2,SHANK2,SLC4A10,SLCO6A1,SOS1,TJP1,TNFAIP2,TNKS1BP1,TTN,TUBA…	67
Diseases and Disorders	Developmental Disorder,Neurological Disease,Organismal Injury and Abnormalities,Psychological Disorders	autism	Autism	1.48e-08	8.4e-07	ANK3,ASTN2,CADPS2,CNTN6,CNTNAP2,CSMD1,DNAH7,DRD2,FHIT,FOXP1,GABRA2,GABRB3,GABRG1,GRIN2A,NINL,NLGN3,NLGN4X,RBFOX1,RELN,SHANK2,SLC6A2,SLC6A4	22
Diseases and Disorders	Cancer,Hematological Disease,Immunological Disease,Organismal Injury and Abnormalities	acute myeloid leukemia	Acute myeloid leukemia	1.51e-08	8.54e-07	ABCB9,ABCC1,ABCG8,AFF3,AKAP9,ALDH7A1,ANK3,ASB3/GPR75-ASB3,ASH1L,BAZ2B,CADM2,CARF,CASP8,CD47,CDHR1,CDKN1A,CELSR3,CENPT,CHGB,CLCA4,CLCN2,CNTNAP2,COL6A3,COL6A6,CPT1C,CRHR1,CSMD1,DBN1,DCAF12,DIABLO,DLEC1,DNAH1,DNAH11,DNAH5,DPP6,DYNC2H1,EDC4,EGFR,EP300,ESR1,ETS1,FAM153A/FAM153B,FBXO10,FLG,FLT3,FMNL3,FOXP1,GABRA2,GABRB3,GABRG1,GOLGA6L9 (includes others),GPRIN1,HCN1,IL17RB,KALRN,KIRREL1,KLHL32,KMT2C,KMT…	134
Molecular and Cellular Functions	Cell Morphology,Cellular Assembly and Organization,Cellular Function and Maintenance	formation	Formation of cellular protrusions	1.76e-08	9.93e-07	ABI2,ACTR3,AGRN,AKAP9,ANK3,CAMK1D,CCDC66,CD47,CDKN1A,CELSR3,CENPJ,CHRNA7,CIBAR1,CKB,CNTNAP2,CPT1C,CRHR1,CRKL,CSMD3,DBN1,DCC,DNAH5,DRD2,DYNC2H1,DYNC2I1,EFNA5,EGFR,EPHB2,ERC2,FARP2,FN1,GABRB3,GEM,GPR37,GPRIN1,HRH2,HSP90AA1,IGF2BP1,KALRN,KIDINS220,KIF20B,KIF24,LAMA5,LINGO1,MAPK3,MAPT,MPRIP,MRTFA,MYO10,NCKIPSD,NEO1,NLGN3,NOTCH1,NRCAM,NRXN1,NUP85,OPA1,OPRM1,PCM1,PIAS3,PKP4,POU3F2,POU4F2,POU4F3,PREX1,P…	99
Diseases and Disorders	Cancer,Hematological Disease,Immunological Disease,Organismal Injury and Abnormalities	neoplasia	Neoplasia of leukocytes	1.79e-08	1e-06	ABCA7,ABCC1,ABCC6,ADAMTS6,ADCY2,ADSL,AGBL4,AGRN,AIFM3,ANK3,ARHGAP26,ARHGEF3,ARHGEF33,ARVCF,ASTN2,ATN1,BAZ2B,BBX,BCL11A,BCL7A,BIRC6,CACNA1D,CACNA1I,CADPS2,CASP8,CCDC66,CD160,CD47,CDH7,CDHR1,CDKN1A,CHST6,CLCA1,CLCA4,CNTN6,CNTNAP2,CNTNAP4,CNTNAP5,COL4A2,COL6A3,COMT,CPNE5,CRHR1,CRKL,CSGALNACT2,CSMD1,CSMD3,CXCL14,DAGLA,DAP,DCC,DGCR2,DHX57,DIABLO,DLC1,DNAH3,DNAH5,DNAH7,DOP1B,DPP4,DRD2,EDC4,EGFR,EMB,EP3…	212
Diseases and Disorders	Cancer,Organismal Injury and Abnormalities,Respiratory Disease	adenocarcinoma	Adenocarcinoma in right upper lobe of lung	2.02e-08	1.13e-06	ADCY2,CADPS2,CDH23,CENPJ,CNTNAP4,CNTNAP5,CSMD1,CSMD3,CTNNA3,DNAH3,DNAH5,DYSF,EGFR,ERRFI1,FBN2,FSCB,ICE1,IMMP2L,INO80D,INSYN1,KALRN,KIDINS220,KIRREL1,KMT2C,LTBP1,LY75,LY75-CD302,MEI1,MUC16,MYO10,NEB,NEO1,NSD1,OBSCN,OVCH1,PCDHB12,PCDHB13,PCDHGA2,PIWIL1,POU3F2,PRPF40B,PTBP2,SGCZ,SLITRK1,SORCS3,TCOF1,TMEM33,TNIK,TNN,TSNAXIP1,TTC27,TTN,UNC13C,WDR62,ZNF518B	55
Diseases and Disorders	Neurological Disease,Organismal Injury and Abnormalities	seizure disorder	Seizure disorder	2.1e-08	1.17e-06	ABCA2,ABCC1,ADM,ALDH7A1,ANK3,AP3B2,ATN1,BHLHE40,CACNA1D,CACNA1I,CACNA2D3,CDH23,CDKN1A,CHGB,CHRNA7,CHRNB4,CHST6,CKB,CLCN2,CNTNAP2,DHDDS,DRD2,DUSP6,EP300,ERRFI1,GABRA2,GABRB3,GABRG1,GRIN2A,GUF1,HCN1,HCN4,HEXB,HRH2,IMPA1,KCNC3,KCNH3,KCNH5,KCNJ11,KCNK1,LINGO1,MAPT,MDH1,ME2,NPRL2,NR4A2,NRXN1,NSF,NUBPL,OPRD1,OPRK1,OPRM1,POLG,PTPRN2,RBFOX1,RELN,RIMS1,SCN5A,SERPINE2,SLC10A4,SLC4A10,SLC6A2,SLC6A4,SPRY2,ST…	69
Diseases and Disorders	Cancer,Hematological Disease,Organismal Injury and Abnormalities	hematologic cancer	Hematologic cancer of cells	2.13e-08	1.18e-06	ABCA7,ABCC1,ABCC6,ADAMTS6,ADCY2,ADSL,AGBL4,AGRN,AIFM3,ANK3,ARHGAP26,ARHGEF3,ARHGEF33,ARVCF,ASTN2,ATN1,BAZ2B,BBX,BCL7A,BIRC6,CACNA1D,CACNA1I,CADPS2,CASP8,CCDC66,CD160,CD47,CDH7,CDHR1,CDKN1A,CHST6,CLCA1,CLCA4,CNTN6,CNTNAP2,CNTNAP4,CNTNAP5,COL4A2,COL6A3,COMT,CPNE5,CRHR1,CRKL,CSMD1,CSMD3,CXCL14,DAGLA,DCC,DGCR2,DHX57,DIABLO,DLC1,DNAH3,DNAH5,DNAH7,DOP1B,DPP4,DRD2,EDC4,EGFR,EP300,ERC2,ETS1,FBN2,FBN3,FHI…	199
Diseases and Disorders	Cancer,Hematological Disease,Organismal Injury and Abnormalities	malignant myeloid neoplasm	Malignant myeloid neoplasm	2.13e-08	1.18e-06	ABCB9,ABCC1,ABCG8,AFF3,AKAP9,ALDH7A1,ANK3,ARHGAP26,ASB3/GPR75-ASB3,ASH1L,BAZ2B,CADM2,CARF,CASP8,CD47,CDHR1,CDKN1A,CELSR3,CENPT,CHGB,CLCA4,CLCN2,CNTNAP2,COL6A3,COL6A6,CPT1C,CRHR1,CSMD1,CSMD3,DBN1,DCAF12,DIABLO,DLEC1,DNAH1,DNAH11,DNAH5,DNAH7,DPP6,DYNC2H1,EDC4,EEF2,EGFR,EP300,ESR1,ETS1,FAM153A/FAM153B,FBXO10,FLG,FLT3,FMNL3,FOXP1,GABRA2,GABRB3,GABRG1,GOLGA6L9 (includes others),GPRIN1,HCN1,IL17RB,KALR…	144
Physiological System Development and Function	Nervous System Development and Function	development	Development of central nervous system	2.35e-08	1.29e-06	ADAM23,ANK3,ATN1,CCDC134,CNTN6,CNTNAP2,CRKL,CX3CL1,DLC1,DNAH5,DPCD,DRD2,DYNC2H1,EFNA5,EGFR,EIF2B2,EPHB2,FGF17,FN1,GABRB3,GAK,HCN1,HIRA,HRH2,IMMP2L,LINGO1,MAPK3,MAPT,MRTFA,MYT1L,NEO1,NIPBL,NKX2-2,NLGN3,NLGN4X,NOTCH1,NOTCH2NLA/NOTCH2NLB,NPAS3,NR1H2,NR4A2,NRCAM,NRXN1,NSUN5,PEX2,PHOX2B,POU3F2,PPIL1,PRMT1,PROKR2,RELN,RERE,RICTOR,ROBO3,RTN4R,SLC23A1,SLC4A10,SLC6A4,SPRY2,TBR1,TCF20,TCOF1,TENM2,TENM4,THB…	73
Diseases and Disorders	Neurological Disease,Organismal Injury and Abnormalities	neurological disorder	Early-onset neurological disorder	2.44e-08	1.34e-06	ABCA7,ALDH7A1,ANK3,AP3B2,CACNA1D,CHRNA7,CLCN2,CNTNAP2,DRD2,EP300,GABRA2,GABRB3,GABRG1,GRIN2A,GTF2IRD1,GUF1,HCN1,HSP90AA1,KARS1,KCNH5,MAPT,MECR,MPO,OPA1,PARK7,POLG,RBFOX1,RELN,SLC6A2,SLC6A4,ST3GAL3,TOR1A,TRIO,TUBA1A,TUBA1C,UCHL1,UNC13C,WWOX	38
Diseases and Disorders	Cancer,Organismal Injury and Abnormalities	malignant neoplasm of connective or soft tissue of abdomen	Malignant neoplasm of connective or soft tissue of abdomen	2.54e-08	1.39e-06	ALKBH6,AP3B2,BNC1,CACNA1I,CHRNA7,CNTN6,CNTNAP2,CORO7/CORO7-PAM16,CSMD3,DBN1,DNAH3,DNAH5,DYNC2H1,EGFR,ESR1,FBN2,FBN3,FSCB,GABRA2,HIRA,HOXB4,HSP90AA1,KIDINS220,KMT2C,KMT2D,LAMA5,MAP3K4,MTUS2,MUC16,MUC6,MYT1L,NAPSA,NFE2L3,NINL,NOTCH1,NRXN1,PCDH11X,PCDHGA2,PCDHGA9,PDCD1,PHF14,PKN2,POLE,PRSS3,PTBP2,RANBP10,RERE,RP1L1,RRM1,SCAPER,SELE,SEMA3E,SERINC2,SHANK2,SLC4A10,SLCO6A1,SOS1,TJP1,TNFAIP2,TNKS1BP1,TTN…	68
Diseases and Disorders	Cancer,Hematological Disease,Organismal Injury and Abnormalities	myeloid neoplasm	Myeloid neoplasm	2.7e-08	1.48e-06	ABCB9,ABCC1,ABCG8,AFF3,AKAP9,ALDH7A1,ANK3,ARHGAP26,ASB3/GPR75-ASB3,ASH1L,BAZ2B,CADM2,CARF,CASP8,CD47,CDHR1,CDKN1A,CELSR3,CENPT,CHGB,CLCA4,CLCN2,CNTNAP2,COL6A3,COL6A6,CPT1C,CRHR1,CSMD1,CSMD3,DBN1,DCAF12,DIABLO,DLEC1,DNAH1,DNAH11,DNAH5,DNAH7,DPP6,DYNC2H1,EDC4,EEF2,EGFR,EP300,ESR1,ETS1,FAM153A/FAM153B,FBXO10,FHL2,FLG,FLT3,FMNL3,FOXP1,GABRA2,GABRB3,GABRG1,GOLGA6L9 (includes others),GPRIN1,HCN1,HDC,HR…	151
Diseases and Disorders	Hematological Disease,Organismal Injury and Abnormalities	bone marrow lesion	Bone marrow lesion	2.71e-08	1.48e-06	ABCB9,ABCC1,ABCG8,AFF3,AKAP9,ALDH7A1,ANK3,ARHGAP26,ASB3/GPR75-ASB3,ASH1L,BAZ2B,CADM2,CARF,CASP8,CD47,CDHR1,CDKN1A,CELSR3,CENPT,CHGB,CLCA4,CLCN2,CNTNAP2,COL6A3,COL6A6,CPT1C,CRHR1,CSMD1,CSMD3,DBN1,DCAF12,DIABLO,DLEC1,DNAH1,DNAH11,DNAH5,DNAH7,DPP6,DYNC2H1,EDC4,EGFR,EP300,ESR1,ETS1,FAM153A/FAM153B,FBXO10,FHL2,FLG,FLT3,FMNL3,FOXP1,GABRA2,GABRB3,GABRG1,GOLGA6L9 (includes others),GPRIN1,HCN1,IFIH1,IL17R…	150
Diseases and Disorders	Neurological Disease,Organismal Injury and Abnormalities	dyskinesia	Dyskinesia	2.74e-08	1.48e-06	ADCY2,AEBP1,AHCY,ATP5IF1,BCL7A,BHLHE40,CAB39,CACNA2D3,CASP8,CD160,CHGB,CHRNA7,CHRNB4,CKB,CPNE5,CX3CL1,DBN1,DIO2,DRD2,EPB41,EPHB2,FFAR3,FOXP1,GABRA2,GABRB3,GABRG1,GPR37,GRIN2A,GTF3A,HSP90AA1,ICA1,IFIH1,IMPA1,INO80D,IP6K2,KCNC3,KCNH7,KCNIP4,LINGO1,MPRIP,MYT1L,NDUFA13,NDUFA4,NDUFA6,NDUFB1,NFE2L3,NGEF,NRXN1,OPRD1,OPRK1,OPRM1,PCDH7,PDE6B,PDLIM7,PFKM,PIAS3,PLEK,PNKD,POLR2I,PPP1R3A,PREPL,RANBP1,RBFOX1,R…	79
Physiological System Development and Function	Embryonic Development,Nervous System Development and Function,Organ Development,Organismal Development,Tissue Development	formation	Formation of brain	2.85e-08	1.54e-06	ANK3,CCDC134,CNTNAP2,CRKL,CX3CL1,DLC1,DNAH5,DPCD,DRD2,DYNC2H1,EFNA5,EGFR,EPHB2,FGF17,GABRB3,GAK,HCN1,HIRA,IMMP2L,MAPK3,MAPT,MRTFA,MYT1L,NEO1,NIPBL,NKX2-2,NLGN4X,NOTCH1,NOTCH2NLA/NOTCH2NLB,NPAS3,NR1H2,NR4A2,NSUN5,PEX2,PHOX2B,POU3F2,PPIL1,PRMT1,PROKR2,RELN,RERE,ROBO3,RTN4R,SLC23A1,SLC4A10,SLC6A4,SPRY2,TBR1,TCF20,TCOF1,THBS1,TNIK,TRIO,TTN,UCHL1,VWC2,WDR62,WNT1,WNT5A,ZBTB20	60
Diseases and Disorders	Cancer,Hematological Disease,Immunological Disease,Organismal Injury and Abnormalities	myeloid leukemia	Myeloid leukemia	3.06e-08	1.65e-06	ABCB9,ABCC1,ABCG8,AFF3,AKAP9,ALDH7A1,ANK3,ARHGAP26,ASB3/GPR75-ASB3,ASH1L,BAZ2B,CADM2,CARF,CASP8,CD47,CDHR1,CDKN1A,CELSR3,CENPT,CHGB,CLCA4,CLCN2,CNTNAP2,COL6A3,COL6A6,CPT1C,CRHR1,CSMD1,DBN1,DCAF12,DIABLO,DLEC1,DNAH1,DNAH11,DNAH5,DNAH7,DPP6,DYNC2H1,EDC4,EGFR,EP300,ESR1,ETS1,FAM153A/FAM153B,FBXO10,FLG,FLT3,FMNL3,FOXP1,GABRA2,GABRB3,GABRG1,GOLGA6L9 (includes others),GPRIN1,HCN1,IL17RB,KALRN,KIRREL1,K…	136
Diseases and Disorders	Cancer,Organismal Injury and Abnormalities	anaplastic carcinoma	Anaplastic carcinoma	3.12e-08	1.68e-06	ABCC1,AIFM3,BCL11A,CASP8,CD276,CD47,CHST6,COL5A1,CORO7/CORO7-PAM16,CSMD1,DIO2,DNAH10,DNAH5,EDC4,EGFR,ENO1,EPHB2,FLT3,FN1,GABRB3,GPR149,GRIN2A,HSP90AA1,KCNH7,MACROD1,MAP3K4,MEI1,MUC16,NLGN3,NR4A2,NSD3,NSF,OAS3,PARK7,PCDHGA2,PDCD1,PHOX2B,PKP4,POLE,PRB1/PRB2,RRM1,SCAPER,SLC26A2,SLC4A10,TEK,TRIO,TTN,TUBA1A,TUBA1C	49
Molecular and Cellular Functions	Cellular Movement	migration	Migration of neural cells	3.78e-08	2.02e-06	CADPS2,CDH23,CELSR3,CEP85L,CNTNAP2,CRKL,CX3CL1,DBN1,DCC,DGCR8,DRD2,EFNA5,EGFR,EPHB2,ERRFI1,FN1,FPR2,HSP90AA1,KIF20B,LMO4,MAPT,MDGA2,MRTFA,NEO1,NR4A2,PCM1,PEX11B,PEX2,PHOX2B,POU3F2,POU4F3,PREX1,RELN,RERE,ROBO3,SDC3,TBR1,TNN,TRIO,TUBA1A	40
Diseases and Disorders	Cancer,Organismal Injury and Abnormalities	undifferentiated malignant neoplasm	Undifferentiated malignant neoplasm	4.49e-08	2.39e-06	ABCC1,AIFM3,BCL11A,CASP8,CD276,CD47,CHST6,COL5A1,CORO7/CORO7-PAM16,CSMD1,DIO2,DNAH10,DNAH5,EDC4,EGFR,ENO1,EPHB2,FLT3,FN1,GABRB3,GPR149,GRIN2A,HSP90AA1,KCNH7,MACROD1,MAP3K4,MEI1,MUC16,NLGN3,NR4A2,NSD3,NSF,OAS3,PARK7,PCDHGA2,PDCD1,PHOX2B,PKP4,POLD1,POLE,PRB1/PRB2,RRM1,SCAPER,SLC26A2,SLC4A10,TEK,TRIO,TTN,TUBA1A,TUBA1C	50
Diseases and Disorders	Developmental Disorder,Neurological Disease,Organismal Injury and Abnormalities,Psychological Disorders	behavioral deficit	Behavioral deficit	4.81e-08	2.56e-06	ABCA2,AP3B2,CADPS2,CHRNA7,CNTNAP2,DRD2,EPHB2,ESR1,GABRB3,GRIN2A,GTF2IRD1,IMPA1,KALRN,KCNC3,KCNH7,MAPK3,MAPT,MCHR1,NLGN3,NPAS3,NR4A2,OPRD1,POU4F3,RCAN1,SCN5A,SHANK2,SLC6A2,SLC6A4,STON2,VGF	30
Diseases and Disorders	Developmental Disorder,Neurological Disease,Organismal Injury and Abnormalities,Psychological Disorders	hyperactive behavior	Hyperactive behavior	4.9e-08	2.6e-06	ABCA2,AP3B2,CADPS2,CHRNA7,CNTNAP2,EPHB2,ESR1,GABRB3,GTF2IRD1,IMPA1,KALRN,KCNC3,MAPK3,MAPT,MCHR1,NLGN3,NPAS3,NR4A2,OPRD1,POU4F3,RCAN1,SHANK2,SLC6A2,SLC6A4,STON2,VGF	26
Diseases and Disorders	Neurological Disease,Organismal Injury and Abnormalities,Psychological Disorders	attention deficit hyperactivity disorder	Attention deficit hyperactivity disorder	5.28e-08	2.79e-06	ASTN2,CHRNA7,COMT,DAGLA,DRD2,GABRA2,GABRB3,GABRG1,GRIN2A,OPRD1,OPRK1,OPRM1,SLC6A2,SLC6A4,SLITRK1	15
Diseases and Disorders	Infectious Diseases,Organismal Injury and Abnormalities	infection	Infection by RNA virus	5.32e-08	2.8e-06	ACTR3,ADM,ANK3,APOM,ARVCF,ATP5IF1,BCL11A,CACNA1D,CACNA1S,CACNA2D3,CAMK1D,CAPN6,CCDC134,CDKN1A,CHADL,CHRNA7,CHRNB4,CLTCL1,COL5A1,CX3CL1,DBN1,DCAF1,DPP4,DRD2,DYNC2H1,DYSF,EEF2,EGFR,EP300,EPSTI1,ERCC5,ESR1,ETS1,FN1,FPR1,FPR3,GABARAPL2,GABPB1,GABRA2,GABRB3,GABRG1,GPLD1,GTF2A1,GTF2H1,HRH2,IFIH1,IMMP2L,KARS1,KCNJ11,LAPTM5,LMAN2,LRPPRC,MANBA,MED15,MGAM,MPL,MRC1,NDUFA6,NLGN3,NR4A2,NSF,NUP85,OAS3,OPRD1,OP…	110
Diseases and Disorders	Neurological Disease,Organismal Injury and Abnormalities	encephalopathy	Early-onset encephalopathy	5.93e-08	3.11e-06	ABCA7,ALDH7A1,AP3B2,CHRNA7,CLCN2,CNTNAP2,EP300,GABRA2,GABRB3,GRIN2A,GUF1,HCN1,HSP90AA1,KARS1,KCNH5,MAPT,MECR,MPO,OPA1,PARK7,POLG,RBFOX1,RELN,SLC6A2,SLC6A4,ST3GAL3,TUBA1A,TUBA1C,UCHL1,UNC13C,WWOX	31
Diseases and Disorders	Cancer,Gastrointestinal Disease,Organismal Injury and Abnormalities,Respiratory Disease	pharyngeal carcinoma	Pharyngeal carcinoma	6.39e-08	3.34e-06	ABCA7,ABCB9,AKAP9,ANK3,ARHGAP26,ARHGEF3,BRPF3,CABLES2,CACNA1S,CASP8,CLCA2,COL5A1,COL6A6,CSMD3,CTNNA3,DGKQ,DLC1,DOK3,EGFR,EP300,ESR1,FAM153A/FAM153B,FAM193B,FIP1L1,FLG,FMNL3,FSCB,GAK,GPRIN1,HSP90AA1,IGSF3,KALRN,KDM5B,KLHL5,KMT2C,LTBP1,MAPT,MTIF3,MUC16,MYO10,NAALAD2,NCKAP5,NCKAP5L,NEB,NOTCH1,OGFOD2,PCDH11X,PCDH17,PDCD1,PDE9A,POLG,PRB1/PRB2,PTPRN2,RAB19,RP1L1,RRM1,TANC1,TENM2,TLN2,TUBA1A,TUBA1C,UCHL…	67
Diseases and Disorders	Cancer,Hematological Disease,Organismal Injury and Abnormalities	bone marrow neoplasm	Bone marrow neoplasm	6.79e-08	3.54e-06	ABCB9,ABCC1,ABCG8,AFF3,AKAP9,ALDH7A1,ANK3,ARHGAP26,ASB3/GPR75-ASB3,ASH1L,BAZ2B,CADM2,CARF,CASP8,CD47,CDHR1,CDKN1A,CELSR3,CENPT,CHGB,CLCA4,CLCN2,CNTNAP2,COL6A3,COL6A6,CPT1C,CRHR1,CSMD1,CSMD3,DBN1,DCAF12,DIABLO,DLEC1,DNAH1,DNAH11,DNAH5,DNAH7,DPP6,DYNC2H1,EDC4,EGFR,EP300,ESR1,ETS1,FAM153A/FAM153B,FBXO10,FHL2,FLG,FLT3,FMNL3,FOXP1,GABRA2,GABRB3,GABRG1,GOLGA6L9 (includes others),GPRIN1,HCN1,IFIH1,IL17R…	148
Diseases and Disorders	Cancer,Organismal Injury and Abnormalities,Reproductive System Disease	uterine carcinosarcoma	Uterine carcinosarcoma	7.76e-08	4.03e-06	ALKBH6,AP3B2,BNC1,CACNA1I,CHRNA7,CNTN6,CNTNAP2,CORO7/CORO7-PAM16,CSMD3,DBN1,DNAH3,DNAH5,DYNC2H1,ESR1,FBN2,FBN3,FSCB,GABRA2,HIRA,HOXB4,HSP90AA1,KIDINS220,LAMA5,MAP3K4,MTUS2,MUC16,MUC6,MYT1L,NAPSA,NFE2L3,NINL,NRXN1,PCDH11X,PCDHGA2,PCDHGA9,PDCD1,PHF14,PKN2,POLE,PRSS3,PTBP2,RANBP10,RP1L1,SCAPER,SELE,SEMA3E,SERINC2,SHANK2,SLC4A10,SLCO6A1,SOS1,TJP1,TNFAIP2,TNKS1BP1,TTN,TUBA1A,TUBA1C,UNC13C,ZDHHC11,ZNF3…	61
Diseases and Disorders	Dermatological Diseases and Conditions,Hematological Disease,Immunological Disease,Organismal Injury and Abnormalities	lymphoproliferative disorder of the skin	Lymphoproliferative disorder of the skin	8.14e-08	4.21e-06	ABCC6,ADAMTS6,AGRN,AIFM3,ANK3,ARHGEF3,ARHGEF33,BIRC6,CASP8,CDHR1,CNTN6,CNTNAP5,CRHR1,CSMD1,CSMD3,CXCL14,DNAH5,DPP4,DRD2,EGFR,ERC2,FBN2,FLG,FOXP1,HSP90AA1,KMT2C,KMT2D,L3MBTL2,MGAM,MTUS2,NOTCH1,OBSCN,PDCD1,PI16,PLCH1,POLD1,PRSS3,PTPRN2,RELN,RRM1,SLC6A4,SPINK5,TSPYL5,TUBA1A,TUBA1C	45
Diseases and Disorders	Cancer,Organismal Injury and Abnormalities,Renal and Urological Disease	upper urinary tract tumor	Upper urinary tract tumor	8.16e-08	4.21e-06	ABCB9,ADAM23,ADCY2,ADM,AKAP9,ALDH7A1,ARHGAP26,ATP5IF1,BHLHE40,BRPF3,BST1,CACNA1S,CADM2,CD276,CDH23,CDKN1A,CLCA1,CLCN2,COL6A3,CORO7/CORO7-PAM16,CSMD1,CSMD3,CXXC4,DCC,DGCR6/LOC102724770,DGCR8,DLC1,DLX6,DNAH7,DPP6,DPP7,DUSP6,EDC4,EGFR,EMB,EP300,EPHB2,ERCC5,ESR1,FBN2,FBXL17,FLG,FLT3,FN1,FOXP1,GABARAPL2,GABPB1,GABRA2,GABRB3,GABRG1,GNPDA2,GPRIN1,GRIN2A,GUF1,HCN4,HNRNPLL,HSP90AA1,IGSF10,IGSF3,KDM5B,KMT2…	135
Diseases and Disorders	Developmental Disorder,Organismal Injury and Abnormalities	global developmental delay	Global developmental delay	9.46e-08	4.87e-06	ANK3,ATN1,BCL11A,CACNA1I,CD160,CDC45,COA8,COMT,ESR1,GABRB3,GP1BB,GPR89A/GPR89B,GRIN2A,KANSL1,LOC102724788/PRODH,NIPA1,NIPBL,PDZK1,PI4KA,POLG,POLR3C,RIMS1,RTN4R,SCARF2,SERPIND1,TANGO2,TBX1,TCF20,TRAF3,TUBGCP5,WWOX	31
Diseases and Disorders	Cancer,Hematological Disease,Immunological Disease,Organismal Injury and Abnormalities	acute lymphoblastic leukemia	Acute lymphoblastic leukemia	1.01e-07	5.16e-06	ADCY2,ANK3,ARHGAP26,ARHGEF33,ARVCF,ASTN2,BBX,CACNA1I,CADPS2,CCDC66,CDH7,CDKN1A,CHST6,CLCA1,CLCA4,CNTN6,CNTNAP2,CNTNAP4,CNTNAP5,COL6A3,CPNE5,DGCR2,DHX57,DLC1,DNAH5,DNAH7,DOP1B,EGFR,EP300,ERC2,FBN2,FBN3,FLG,FLT3,FSCB,GEM,GRIN2A,GTF2IRD1,IGF2BP1,IL17RB,KLHL38,KMT2D,LIX1L,LTBP1,LZTR1,MACROD1,ME2,MUC16,NAT8L,NGEF,NIPBL,NOTCH1,NRXN1,OPA1,OPRD1,PCDH7,PCDHGA2,PCDHGA9,PDCD1,PDE4A,PDGFRL,PLEK2,POLD1,POLE,P…	87
Diseases and Disorders	Cancer,Hematological Disease,Immunological Disease,Organismal Injury and Abnormalities	B-lymphoblastic leukemia/lymphoma	B-lymphoblastic leukemia/lymphoma	1.13e-07	5.78e-06	ADCY2,ANK3,ARHGEF33,ARVCF,ASTN2,BBX,CACNA1I,CCDC66,CDH7,CLCA4,CNTN6,CNTNAP2,CNTNAP4,CNTNAP5,COL6A3,CPNE5,DGCR2,DHX57,DLC1,DNAH5,DNAH7,DOP1B,EGFR,EP300,ERC2,FBN2,FBN3,FLG,FLT3,FSCB,GEM,GRIN2A,GTF2IRD1,IGF2BP1,KMT2D,LIX1L,LTBP1,LZTR1,MACROD1,ME2,NGEF,NIPBL,NOTCH1,NRXN1,OPRD1,PCDH7,PCDHGA2,PCDHGA9,PDCD1,PLEK2,POLD1,POLE,POLG,POSTN,POU4F2,PPP1R3A,PTPRU,RBM12B,RELN,RNF215,ROBO3,RRM1,SESN2,SLC6A2,SORCS…	74
Molecular and Cellular Functions	Cell-To-Cell Signaling and Interaction	quantity	Quantity of neurotransmitter	1.15e-07	5.87e-06	ALDH7A1,COMT,CRHR1,DRD2,ERC2,FFAR3,GABRA2,GCG,GPR37,GTF2IRD1,HDC,MAPT,MCHR1,NOTCH1,NR4A2,OPRK1,PARK7,PNKD,PTPRN2,SEPTIN5,SLC23A2,SLC6A2,SLC6A4,SLITRK1,TEF,VGF,VPS13A	27
Diseases and Disorders	Cancer,Endocrine System Disorders,Organismal Injury and Abnormalities	abdominal neuroendocrine tumor	Abdominal neuroendocrine tumor	1.23e-07	6.24e-06	ABCB9,ADCY2,AFF3,BEND4,CACNA1S,CACNA2D3,CADPS2,CARF,CD276,CELSR3,CEP128,CHDH,CLCA1,CLCA4,CNTNAP2,COL6A3,COL6A6,CSMD1,DAGLA,DLC1,DNAH11,DNAH3,DNAH5,DNAJC13,DOP1B,DRD2,DYSF,EP300,ERCC5,FBN2,FLT3,FMO2,GABRA2,GRIN2A,HCN1,HRH2,HS2ST1,HSP90AA1,IGSF10,KAT14,KCNH7,KCNJ11,KIDINS220,KMT2C,KMT2D,LAMA5,LY75,LY75-CD302,MAPK3,MARK3,MUC16,NCKAP5L,NEB,NOTCH1,NRCAM,NSF,OBSCN,OGFOD2,OPRK1,PCDH7,PDCD1,PDLIM7,PHF3,P…	90
Molecular and Cellular Functions	Molecular Transport	transport	Transport of molecule	1.24e-07	6.29e-06	ABCA2,ABCA7,ABCB9,ABCC1,ABCC6,ABCG8,ADM,AEBP1,ANK3,AP3B2,APOM,AQP5,ARF3,ATP5IF1,BHLHE40,CACNA1D,CACNA1I,CACNA1S,CACNA2D3,CADPS2,CDH23,CDKN1A,CDX2,CHMP1A,CHRNA7,CHRNB4,CLCA1,CLCA2,CLCA4,CLCN2,CLTCL1,CORO7/CORO7-PAM16,CPEB1,CRHR1,CX3CL1,DESI1,DIO2,DOP1B,DPP6,DRD2,EGFR,EP300,ESR1,FBN2,FFAR3,FN1,FPR1,FPR2,GABRA2,GABRB3,GCG,GPLD1,GRIN2A,HCN1,HCN4,HDC,HRH2,HSP90AA1,IP6K2,JUND,KALRN,KCNC3,KCNH3,KCNH7,KC…	141
Diseases and Disorders	Cancer,Hematological Disease,Organismal Injury and Abnormalities	bone marrow cancer	Bone marrow cancer	1.33e-07	6.7e-06	ABCB9,ABCC1,ABCG8,AFF3,AKAP9,ALDH7A1,ANK3,ARHGAP26,ASB3/GPR75-ASB3,ASH1L,BAZ2B,CADM2,CARF,CASP8,CD47,CDHR1,CDKN1A,CELSR3,CENPT,CHGB,CLCA4,CLCN2,CNTNAP2,COL6A3,COL6A6,CPT1C,CRHR1,CSMD1,CSMD3,DBN1,DCAF12,DIABLO,DLEC1,DNAH1,DNAH11,DNAH5,DNAH7,DPP6,DYNC2H1,EDC4,EGFR,EP300,ESR1,ETS1,FAM153A/FAM153B,FBXO10,FLG,FLT3,FMNL3,FOXP1,GABRA2,GABRB3,GABRG1,GOLGA6L9 (includes others),GPRIN1,HCN1,IL17RB,KALRN,KIR…	142
Diseases and Disorders	Cancer,Organismal Injury and Abnormalities	soft tissue sarcoma cancer	Soft tissue sarcoma	1.36e-07	6.82e-06	AGRN,ALKBH6,AP3B2,ASPN,BNC1,CACNA1I,CACNA1S,CDKN1A,CENPT,CHRNA7,CNTN6,CNTNAP2,CORO7/CORO7-PAM16,CPS1,CRKL,CSMD3,CTNNA3,DBN1,DLEC1,DNAH3,DNAH5,DOP1B,DPP6,DYNC2H1,EGFR,EPHB2,ERCC5,ESR1,FBN2,FBN3,FLT3,FN1,FSCB,GABRA2,HIRA,HOXB4,HSP90AA1,ICE1,INO80D,KIDINS220,KLB,KMT2C,KMT2D,KMT5A,LAMA5,LRPPRC,MAP3K4,MINAR1,MTUS2,MUC16,MUC6,MYT1L,NAPSA,NCKAP5L,NINL,NOTCH1,NRXN1,NSD1,OBSCN,PCDH11X,PCDHGA2,PCDHGA9,PDCD…	100
Diseases and Disorders	Cancer,Hematological Disease,Immunological Disease,Organismal Injury and Abnormalities	precursor B-cell acute lymphoblastic leukemia	Precursor B-cell acute lymphoblastic leukemia	1.53e-07	7.68e-06	ADCY2,ANK3,ARHGEF33,ARVCF,ASTN2,BBX,CACNA1I,CCDC66,CDH7,CLCA4,CNTN6,CNTNAP2,CNTNAP4,CNTNAP5,COL6A3,CPNE5,DGCR2,DHX57,DLC1,DNAH5,DNAH7,DOP1B,EGFR,EP300,ERC2,FBN2,FBN3,FLG,FLT3,FSCB,GEM,GRIN2A,GTF2IRD1,KMT2D,LIX1L,LTBP1,LZTR1,MACROD1,ME2,NGEF,NIPBL,NOTCH1,NRXN1,OPRD1,PCDH7,PCDHGA2,PCDHGA9,PDCD1,PLEK2,POLD1,POLE,POLG,POSTN,POU4F2,PPP1R3A,PTPRU,RBM12B,RELN,RNF215,ROBO3,RRM1,SESN2,SLC6A2,SORCS3,TEK,TG…	73
Diseases and Disorders	Cancer,Hematological Disease,Immunological Disease,Organismal Injury and Abnormalities	T-cell malignant neoplasm	T-cell malignant neoplasm	1.61e-07	8.05e-06	ABCC6,ADAMTS6,AGRN,AIFM3,ANK3,ARHGEF3,ARHGEF33,ASH1L,BBX,BIRC6,CACNA1D,CASP8,CD47,CDH23,CDHR1,CDKN1A,CELSR3,CNTN6,CNTNAP5,COL4A2,CRHR1,CSMD1,CSMD3,CXCL14,DCC,DNAH1,DNAH11,DNAH5,DPP4,DRD2,EGFR,ENO1,EP300,EPHB2,ERC2,FBN2,FHIT,FLG,FLT3,FN1,FOXP1,GTF2IRD1,HSP90AA1,HTRA3,IGSF3,IMMP2L,JUND,KMT2C,KMT2D,L3MBTL2,LAMA5,LINGO1,MAP3K6,MAPK3,MAU2,MGAM,MTUS2,NAALAD2,NAPSA,NGEF,NOTCH1,NR4A2,NRCAM,NRXN1,OBSCN,P3…	100
Diseases and Disorders	Cardiovascular Disease,Organismal Injury and Abnormalities	abnormality	Abnormality of heart ventricle	1.64e-07	8.17e-06	ADM,ALPK3,APOM,CACNA1D,CACNA1S,CACNA2D3,CASP8,CDKN1A,CEP85L,CRKL,CTNNA3,DGCR8,DPP4,EGFR,EP300,ESR1,FHL2,GABRA2,GABRB3,GABRG1,HCN4,HOXB4,KCNJ11,KIDINS220,MRTFA,NOTCH1,OPRD1,OPRK1,OPRM1,PDCD1,PDE4A,PDE9A,PFKM,PIM1,POSTN,RCAN1,RERE,SCN5A,SELE,SLC6A2,SLC6A4,TBX1,TEAD2,TEK,THBS1,TIMP2,TJP1,TTN,TXNRD2,WNT3	50
Diseases and Disorders	Cancer,Hematological Disease,Immunological Disease,Organismal Injury and Abnormalities	tumorigenesis	Tumorigenesis of lymphocytes	1.69e-07	8.42e-06	ABCA7,ABCC1,ABCC6,ADAMTS6,ADCY2,ADSL,AGBL4,AGRN,AIFM3,ANK3,ARHGEF3,ARHGEF33,ARVCF,ASTN2,ATN1,BAZ2B,BBX,BCL11A,BCL7A,BIRC6,CACNA1D,CACNA1I,CASP8,CCDC66,CD160,CD47,CDH7,CDHR1,CDKN1A,CLCA4,CNTN6,CNTNAP2,CNTNAP4,CNTNAP5,COL4A2,COL6A3,COMT,CPNE5,CRHR1,CRKL,CSGALNACT2,CSMD1,CSMD3,CXCL14,DAGLA,DAP,DCC,DGCR2,DHX57,DIABLO,DLC1,DNAH3,DNAH5,DNAH7,DOP1B,DPP4,DRD2,EDC4,EGFR,EMB,EP300,EPSTI1,ERC2,ETS1,FAM153A/…	199
Diseases and Disorders	Cancer,Gastrointestinal Disease,Organismal Injury and Abnormalities	esophagus tumor	Esophagus tumor	1.8e-07	8.92e-06	ABCG8,AGBL4,ASTN2,CCDC92,CDKN1A,CDX2,CHRNA7,CNTN6,CNTNAP4,CNTNAP5,COL8A1,CSMD3,DCC,DIO2,DLEC1,DLX6,DNAH10,DNAH3,EGFR,EP300,FBN2,FHIT,FLG,FLT3,FOXP1,GLE1,GPR63,HSP90AA1,KCTD20,KMT2C,KMT2D,LZTR1,MCRS1,MDGA2,MGAM,MUC16,MUC6,NFE2L3,NOTCH1,OR52A5,PCDHGA2,PCDHGA9,PDCD1,PDGFRL,PHF14,POSTN,POU4F3,PPP1R3A,PROKR2,RIMBP2,RP1L1,SCN5A,SERINC2,SLC39A12,SLC6A2,SLC6A4,SLCO4C1,TENM4,TJP1,TNN,TNRC6A,TRIO,TTN,TUBA1…	69
Diseases and Disorders	Developmental Disorder,Neurological Disease,Organismal Injury and Abnormalities,Psychological Disorders	pervasive developmental disorder	Pervasive developmental disorder	1.81e-07	8.93e-06	ANK3,AP3B2,ASTN2,BIRC6,CADPS2,CNTN6,CNTNAP2,CSMD1,DNAH7,DRD2,FHIT,FOXP1,GABRA2,GABRB3,GABRG1,GRIN2A,LZTR1,MGST1,NINL,NLGN3,NLGN4X,NR4A2,NRCAM,NRXN1,RBFOX1,RELN,RERE,SHANK2,SLC6A2,SLC6A4,SORT1,STARD9,THBS1,WWOX,ZBTB20,ZNF385D	36
Diseases and Disorders	Cancer,Organismal Injury and Abnormalities,Renal and Urological Disease	neoplasia	Renal tumor	2.01e-07	9.89e-06	ABCB9,ADAM23,ADCY2,ADM,AKAP9,ALDH7A1,ARHGAP26,ATP5IF1,BHLHE40,BRPF3,BST1,CACNA1S,CADM2,CD276,CDH23,CDKN1A,CLCA1,CLCN2,COL6A3,CORO7/CORO7-PAM16,CSMD1,CSMD3,CXXC4,DCC,DGCR6/LOC102724770,DGCR8,DLC1,DLX6,DNAH7,DPP6,DPP7,DUSP6,EDC4,EGFR,EMB,EP300,EPHB2,ERCC5,ESR1,FBN2,FBXL17,FLG,FLT3,FN1,GABARAPL2,GABPB1,GABRA2,GABRB3,GABRG1,GNPDA2,GPRIN1,GRIN2A,GUF1,HCN4,HNRNPLL,HSP90AA1,IGSF10,IGSF3,KDM5B,KMT2C,KMT2…	133
Diseases and Disorders	Cancer,Organismal Injury and Abnormalities,Renal and Urological Disease	renal cancer	Renal cancer	2.1e-07	1.03e-05	ABCB9,ADAM23,ADCY2,ADM,AKAP9,ALDH7A1,ARHGAP26,ATP5IF1,BHLHE40,BRPF3,BST1,CACNA1S,CADM2,CD276,CDH23,CDKN1A,CLCA1,CLCN2,COL6A3,CORO7/CORO7-PAM16,CSMD1,CSMD3,CXXC4,DCC,DGCR6/LOC102724770,DGCR8,DLC1,DLX6,DNAH7,DPP6,DPP7,DUSP6,EDC4,EGFR,EMB,EP300,EPHB2,ERCC5,ESR1,FBN2,FBXL17,FLG,FLT3,FN1,GABARAPL2,GABPB1,GABRA2,GABRB3,GABRG1,GNPDA2,GPRIN1,GRIN2A,GUF1,HCN4,HNRNPLL,HSP90AA1,IGSF10,IGSF3,KDM5B,KMT2C,KMT2…	131
Diseases and Disorders	Cancer,Hematological Disease,Organismal Injury and Abnormalities	mature lymphocytic neoplasm	Mature lymphocytic neoplasm	2.14e-07	1.05e-05	ABCC1,ABCC6,ADAMTS6,ADSL,AGBL4,AGRN,AIFM3,ANK3,ARHGEF3,ARHGEF33,ATN1,BAZ2B,BBX,BCL11A,BCL7A,BIRC6,CACNA1D,CASP8,CD160,CD47,CDH7,CDHR1,CDKN1A,CLCA4,CNTN6,CNTNAP2,CNTNAP4,CNTNAP5,COL4A2,COMT,CRHR1,CSGALNACT2,CSMD1,CSMD3,CXCL14,DAGLA,DAP,DCC,DIABLO,DNAH3,DNAH5,DNAH7,DOP1B,DPP4,DRD2,EDC4,EGFR,EMB,EP300,EPSTI1,ERC2,ETS1,FAM153A/FAM153B,FBN2,FHIT,FLG,FLT3,FN1,FOXP1,GPRIN1,HSP90AA1,IGSF3,IMMP2L,JUND,KAL…	155
Diseases and Disorders	Cancer,Organismal Injury and Abnormalities,Reproductive System Disease	mixed Mullerian endometrial cancer	Endometrial carcinosarcoma	2.31e-07	1.13e-05	ALKBH6,AP3B2,BNC1,CACNA1I,CHRNA7,CNTN6,CNTNAP2,CORO7/CORO7-PAM16,CSMD3,DBN1,DNAH3,DNAH5,DYNC2H1,ESR1,FBN2,FBN3,FSCB,GABRA2,HIRA,HOXB4,HSP90AA1,KIDINS220,LAMA5,MAP3K4,MTUS2,MUC16,MUC6,MYT1L,NAPSA,NINL,NRXN1,PCDH11X,PCDHGA2,PCDHGA9,PDCD1,PHF14,PKN2,PRSS3,PTBP2,RANBP10,RP1L1,SCAPER,SELE,SEMA3E,SERINC2,SHANK2,SLC4A10,SLCO6A1,SOS1,TJP1,TNFAIP2,TNKS1BP1,TTN,TUBA1A,TUBA1C,UNC13C,ZDHHC11,ZNF382,ZNF536	59
Diseases and Disorders	Organismal Injury and Abnormalities	low back pain	Low back pain	2.54e-07	1.24e-05	CACNA2D3,COMT,DRD2,GABRA2,GABRB3,GABRG1,GRIN2A,HRH2,OPRD1,OPRK1,OPRM1,SCN5A,SLC6A2,SLC6A4	14
Diseases and Disorders	Infectious Diseases,Organismal Injury and Abnormalities	HIV infection	HIV infection	2.65e-07	1.29e-05	ACTR3,BCL11A,CACNA2D3,CAMK1D,CAPN6,CCDC134,CHADL,CHRNA7,COL5A1,CX3CL1,DCAF1,DPP4,DYSF,EGFR,EP300,ERCC5,ESR1,FN1,FPR1,GABARAPL2,GABPB1,GABRA2,GABRB3,GABRG1,GTF2A1,GTF2H1,HRH2,KARS1,KCNJ11,LAPTM5,LMAN2,LRPPRC,MANBA,MED15,MRC1,NDUFA6,NLGN3,NUP85,OPRD1,OPRK1,OPRM1,OTUD1,PCDH11X,PDE4A,PFKM,PHF2,PHF3,PI4KA,PKN2,PMM1,POLD1,POLE,POLG,POLR2I,PTPRN2,PTPRU,RANBP1,RPA2,RRM1,SLC6A2,SLC6A4,SOWAHA,ST3GAL3,STARD…	70
Diseases and Disorders	Cancer,Hematological Disease,Immunological Disease,Organismal Injury and Abnormalities	mature T-cell neoplasm	Mature T-cell neoplasm	2.79e-07	1.35e-05	ABCC6,ADAMTS6,AGRN,AIFM3,ANK3,ARHGEF3,ARHGEF33,BBX,BIRC6,CACNA1D,CASP8,CD47,CDHR1,CNTN6,CNTNAP5,COL4A2,CRHR1,CSMD1,CSMD3,CXCL14,DCC,DNAH5,DPP4,DRD2,EGFR,EP300,ERC2,FBN2,FHIT,FLG,FLT3,FN1,FOXP1,HSP90AA1,IGSF3,IMMP2L,JUND,KMT2C,KMT2D,L3MBTL2,LINGO1,MAPK3,MGAM,MTUS2,NOTCH1,NR4A2,NRCAM,OBSCN,PCDH17,PDCD1,PI16,PIM1,PLCH1,POLD1,PRSS3,PTPRN2,RELN,RRM1,SLC6A4,SPINK5,TIMP2,TJP1,TRAF3,TRIO,TSPYL5,TUBA1A,TU…	69
Diseases and Disorders	Neurological Disease,Organismal Injury and Abnormalities	chorea	Chorea	2.85e-07	1.37e-05	ADCY2,AEBP1,AHCY,ATP5IF1,BCL7A,BHLHE40,CAB39,CACNA2D3,CASP8,CD160,CHGB,CKB,CPNE5,CX3CL1,DBN1,DIO2,DRD2,EPB41,EPHB2,FFAR3,FOXP1,GABRA2,GABRB3,GABRG1,GPR37,GRIN2A,GTF3A,HSP90AA1,ICA1,IFIH1,IMPA1,INO80D,IP6K2,KCNH7,KCNIP4,LINGO1,MPRIP,MYT1L,NDUFA13,NDUFA4,NDUFA6,NDUFB1,NFE2L3,NGEF,NRXN1,OPRD1,OPRK1,OPRM1,PCDH7,PDE6B,PDLIM7,PFKM,PIAS3,PLEK,POLR2I,PPP1R3A,PREPL,RANBP1,RBFOX1,RCAN1,RERE,SCN5A,SEPTIN5,S…	72
Diseases and Disorders	Cancer,Organismal Injury and Abnormalities,Renal and Urological Disease	bladder carcinoma	Bladder carcinoma	2.87e-07	1.38e-05	ABCA2,ABCB9,ABCC1,ABCC6,ADAMTS6,AEBP1,AFF3,ALPK3,ASH1L,BIRC6,CACNA1I,CACNA1S,CACNA2D3,CADPS2,CALN1,CAPN6,CARF,CASP8,CCDC71,CDH7,CDKN1A,CELSR3,CENPT,CEP128,CLCA1,CNTNAP2,COL6A3,COMT,CPS1,CSMD1,DAGLA,DHDDS,DLC1,DLX6,DNAH3,DNAH5,DNAJC13,DOP1B,EGFR,EP300,EPB41,EPSTI1,ESS2,FBN2,FBN3,FLG,FLT3,GABRA2,GNB1L,GPRIN1,GRIN2A,GTF2IRD1,GTF3A,HCN1,HSP90AA1,HTRA3,IGSF10,KALRN,KAT14,KCNH5,KCNH7,KCNJ11,KIDINS220,K…	144
Diseases and Disorders	Gastrointestinal Disease,Organismal Injury and Abnormalities	esophageal lesion	Esophageal lesion	2.88e-07	1.38e-05	ABCG8,AGBL4,ASTN2,CCDC92,CDKN1A,CDX2,CHRNA7,CNTN6,CNTNAP4,CNTNAP5,COL8A1,CSMD3,DCC,DIO2,DLEC1,DLX6,DNAH10,DNAH3,DRD2,EGFR,EP300,FBN2,FHIT,FLG,FLT3,FOXP1,GLE1,GPR63,HDC,HRH2,HSP90AA1,KCTD20,KMT2C,KMT2D,LY75,LZTR1,MCRS1,MDGA2,MGAM,MUC16,MUC6,NFE2L3,NOTCH1,OR52A5,PCDHGA2,PCDHGA9,PDCD1,PDGFRL,PHF14,POSTN,POU4F3,PPP1R3A,PROKR2,RIMBP2,RP1L1,SCN5A,SERINC2,SLC39A12,SLC6A2,SLC6A4,SLCO4C1,TENM4,TJP1,TNN,TN…	73
Diseases and Disorders | Physiological System Development and Function	Nervous System Development and Function,Neurological Disease,Organ Morphology,Organismal Development,Organismal Injury and Abnormalities	abnormal morphology	Abnormal morphology of brain	2.89e-07	1.38e-05	ABI2,ANK3,CADPS2,CCDC134,CELSR3,CHRNA7,CKB,CLCN2,CNTN6,CNTNAP2,CX3CL1,DBN1,DCC,EFNA5,EGFR,EPHB2,ESR1,FGF17,GABRB3,GPR37,HDC,HEXB,HIRA,KALRN,KIDINS220,MANBA,MAPT,NOTCH1,NPAS3,NR4A2,NRCAM,PARK7,PEX11B,PEX2,POU3F2,POU4F2,PROKR2,RIMS1,RTN4R,SERPINE2,SHANK2,SLC4A10,SLC6A4,SPAG17,TBR1,TCOF1,TENM2,TRIO,WNT1,XRCC6	50
Physiological System Development and Function	Behavior	spatial learning	Spatial learning	3.02e-07	1.44e-05	ABCA7,CHRNA7,CKB,CPT1C,CRHR1,DRD2,DSTYK,EP300,EPB41,EPHB2,GRIN2A,HCN1,HDC,HRH2,LMO4,MAPT,NLGN3,NPTN,NRCAM,OPRM1,PREX1,SEPTIN5,SHANK2,SLC24A2,SORCS3,TANC1,VGF,WWC1	28
Diseases and Disorders	Cancer,Organismal Injury and Abnormalities,Renal and Urological Disease	cancer	Bladder cancer	3.03e-07	1.44e-05	ABCA2,ABCB9,ABCC1,ABCC6,ADAMTS6,AEBP1,AFF3,ALPK3,ASH1L,BIRC6,CACNA1I,CACNA1S,CACNA2D3,CADPS2,CALN1,CAPN6,CARF,CASP8,CCDC71,CDH7,CDKN1A,CELSR3,CENPT,CEP128,CHRNA7,CHRNB4,CLCA1,CNTNAP2,COL6A3,COMT,CPS1,CSMD1,DAGLA,DHDDS,DLC1,DLX6,DNAH3,DNAH5,DNAJC13,DOP1B,EGFR,EP300,EPB41,EPSTI1,ESS2,FBN2,FBN3,FLG,FLT3,FN1,GABRA2,GNB1L,GPRIN1,GRIN2A,GTF2IRD1,GTF3A,HCN1,HSP90AA1,HTRA3,IGSF10,KALRN,KAT14,KCNH5,KCNH7,…	151
Diseases and Disorders	Cancer,Endocrine System Disorders,Organismal Injury and Abnormalities,Reproductive System Disease	ovarian serous tumor	Ovarian serous tumor	3.17e-07	1.5e-05	ADCY2,AEBP1,AGBL4,ALDH7A1,ASB3/GPR75-ASB3,BNC1,BRPF3,CADPS2,CDH23,CDHR1,CDKN1A,CELSR3,CLTCL1,CNTNAP5,COL5A1,CRKL,CSMD1,DCAF1,DNAH11,DNAH3,DNAH5,DNAH7,DPP4,EGFR,EP300,EXOC3L4,FAM153A/FAM153B,FBN3,FLT3,GPR75,GTF2IRD1,HSP90AA1,IFIH1,IGF2BP1,KALRN,KCNH5,KLHL5,KMT2C,KMT2D,MACROD1,MPO,MUC16,MYO10,NCKAP5,NFE2L3,NLGN3,NOTCH1,NPAS3,NSD1,OBSCN,OSBPL2,P3H2,PCDH12,PCDHB12,PCDHGA2,PCDHGA9,PDCD1,PHF3,PLCH1,POS…	76
Diseases and Disorders	Cancer,Gastrointestinal Disease,Organismal Injury and Abnormalities	esophageal cancer	Esophageal cancer	3.27e-07	1.54e-05	ABCG8,AGBL4,ASTN2,CCDC92,CDKN1A,CDX2,CHRNA7,CNTN6,CNTNAP4,CNTNAP5,COL8A1,CSMD3,DCC,DIO2,DLEC1,DLX6,DNAH10,DNAH3,EGFR,EP300,FBN2,FHIT,FLG,FLT3,FOXP1,GLE1,GPR63,HSP90AA1,KCTD20,KMT2C,KMT2D,LZTR1,MDGA2,MGAM,MUC16,MUC6,NFE2L3,NOTCH1,OR52A5,PCDHGA2,PCDHGA9,PDCD1,PDGFRL,PHF14,POSTN,POU4F3,PPP1R3A,PROKR2,RIMBP2,RP1L1,SCN5A,SERINC2,SLC39A12,SLC6A2,SLC6A4,SLCO4C1,TENM4,TJP1,TNN,TNRC6A,TRIO,TTN,TUBA1A,TUBA…	68
Diseases and Disorders	Cancer,Organismal Injury and Abnormalities	sarcoma	Sarcoma	3.55e-07	1.67e-05	AGRN,ALKBH6,AP3B2,ASPN,ASTN2,BNC1,CACNA1I,CACNA1S,CDKN1A,CENPT,CHRNA7,CNTN6,CNTNAP2,CORO7/CORO7-PAM16,CPS1,CRKL,CSMD3,CTNNA3,DBN1,DLC1,DLEC1,DNAH3,DNAH5,DOP1B,DPP6,DYNC2H1,EGFR,EPHB2,ERCC5,ESR1,FBN2,FBN3,FLT3,FN1,FSCB,GABRA2,HIRA,HOXB4,HSP90AA1,ICE1,INO80D,KIDINS220,KLB,KMT2C,KMT2D,KMT5A,LAMA5,LINGO1,LRPPRC,MAP3K4,MINAR1,MRTFA,MTUS2,MUC16,MUC6,MYT1L,NAPSA,NCKAP5L,NINL,NIPBL,NOTCH1,NRXN1,NSD1,OBSC…	115
Diseases and Disorders	Cancer,Hematological Disease,Immunological Disease,Organismal Injury and Abnormalities	T-cell non-Hodgkin disease	T-cell non-Hodgkin lymphoma	3.59e-07	1.68e-05	ABCC6,ADAMTS6,AGRN,AIFM3,ANK3,ARHGEF3,ARHGEF33,BBX,BIRC6,CACNA1D,CASP8,CD47,CDHR1,CDKN1A,CNTN6,CNTNAP5,COL4A2,CRHR1,CSMD1,CSMD3,CXCL14,DCC,DNAH5,DPP4,DRD2,EGFR,EP300,ERC2,FBN2,FHIT,FLG,FLT3,FN1,FOXP1,HSP90AA1,IGSF3,IMMP2L,JUND,KMT2C,KMT2D,L3MBTL2,MAPK3,MGAM,MTUS2,NOTCH1,NR4A2,OBSCN,PCDH17,PDCD1,PI16,PIM1,PLCH1,POLD1,POLE,PRSS3,PTPRN2,RELN,RRM1,SLC6A4,SPINK5,TIMP2,TJP1,TRAF3,TSPYL5,TUBA1A,TUBA1C,W…	69
Diseases and Disorders	Cancer,Gastrointestinal Disease,Organismal Injury and Abnormalities	cecum adenocarcinoma	Cecum adenocarcinoma	3.67e-07	1.72e-05	ABI2,ADAM23,AFF3,AGBL4,ALPK3,ASTN2,BCL11A,CCDC66,COP1,CSMD1,CSMD3,DNAJB7,DYSF,EP300,ERRFI1,FIP1L1,FKBP6,FLT3,GPRIN1,KCNC3,KMT2C,KMT2D,MARF1,MED15,MUC6,NFE2L3,NINL,NOTCH1,NOTCH2NLA/NOTCH2NLB,NSD1,NUCB2,PCDH7,PCDHB12,PCDHGA2,PCDHGA9,PDCD1,PHF2,PKN2,POLD1,POLE,POLG,POU4F2,PPP1R16B,PREPL,PREX1,PRSS3,PSME4,RGS12,SBNO1,SENP6,TEAD2,TRIO,TSHR,TTN,UNC13C,WNT1,XPNPEP3,ZBTB20,ZCRB1,ZDHHC8,ZNF461,ZNF536	62
Diseases and Disorders	Organismal Injury and Abnormalities,Psychological Disorders	mood disorder	Mood Disorders	3.97e-07	1.85e-05	ADCY2,ADM,AHCY,ANK3,CACNA1D,CACNA1I,CACNA1S,CACNA2D3,CAPN6,CD47,CHRNA7,CHRNB4,COMT,CRHR1,DIABLO,DRD2,EGFR,ESR1,FAM153A/FAM153B,GABRA2,GABRB3,GABRG1,GRIN2A,HRH2,KCNH7,MAPT,MRPL3,NEO1,NPAS3,OPRD1,OPRK1,OPRM1,P2RX2,PDE9A,POU3F2,PSKH1,PTPRU,RCAN1,RELN,RIMS1,SCN5A,SHANK2,SLC6A2,SLC6A4,SPRY2,STARD9,TBR1,TENM4,VGF	49
Diseases and Disorders	Cancer,Gastrointestinal Disease,Organismal Injury and Abnormalities,Respiratory Disease	nasopharyngeal carcinoma	Nasopharyngeal carcinoma	4.22e-07	1.96e-05	ABCB9,ANK3,ARHGAP26,ARHGEF3,BRPF3,CABLES2,CACNA1S,CLCA2,COL5A1,CTNNA3,DGKQ,DLC1,DOK3,EGFR,EP300,ESR1,FAM153A/FAM153B,FAM193B,FIP1L1,FLG,FMNL3,GAK,GPRIN1,HSP90AA1,IGSF3,KDM5B,KLHL5,KMT2C,LTBP1,MAPT,MTIF3,MYO10,NCKAP5,NCKAP5L,NEB,OGFOD2,PCDH11X,PCDH17,PDCD1,POLG,PRB1/PRB2,PTPRN2,RP1L1,RRM1,TANC1,TLN2,TUBA1A,TUBA1C,UCHL1,URB1,USF2,ZNF557,ZNF681,ZNF799	54
Diseases and Disorders	Neurological Disease,Organismal Injury and Abnormalities	seizures	Seizures	4.31e-07	2e-05	ABCA2,ADM,ALDH7A1,ANK3,AP3B2,ATN1,BHLHE40,CACNA1D,CACNA1I,CACNA2D3,CDH23,CDKN1A,CHGB,CHRNA7,CHRNB4,CHST6,CKB,CLCN2,CNTNAP2,DHDDS,DRD2,DUSP6,EP300,ERRFI1,GABRA2,GABRB3,GABRG1,GRIN2A,GUF1,HCN1,HEXB,HRH2,IMPA1,KCNC3,KCNH3,KCNH5,KCNJ11,KCNK1,LINGO1,MAPT,NUBPL,POLG,PTPRN2,RBFOX1,RELN,RIMS1,SCN5A,SERPINE2,SLC10A4,SLC4A10,SLC6A2,SLC6A4,SPRY2,ST3GAL3,TNRC6A,USF2,WWOX	57
Physiological System Development and Function	Behavior	emotional behavior	Emotional behavior	4.34e-07	2.01e-05	ABCA2,CADPS2,CD47,CNTNAP2,CNTNAP4,COMT,CRHR1,DIO2,DPP4,DRD2,EPHB2,ESR1,GABRA2,GABRB3,GABRG1,GCG,GRIN2A,GTF2IRD1,KCNH7,KCNJ11,MAPK3,MAPT,NAT8L,NPAS3,NR4A2,NRXN1,OPRM1,PDE6B,PREX1,PTPRN2,RIMS1,SCN5A,SHANK2,SLC6A2,SLC6A4,SLITRK1,TBR1,VGF	38
Diseases and Disorders	Cancer,Gastrointestinal Disease,Organismal Injury and Abnormalities	esophageal carcinoma	Esophageal carcinoma	4.37e-07	2.02e-05	ABCG8,AGBL4,ASTN2,CCDC92,CDX2,CHRNA7,CNTN6,CNTNAP4,CNTNAP5,COL8A1,CSMD3,DCC,DIO2,DLEC1,DLX6,DNAH10,DNAH3,EGFR,EP300,FBN2,FHIT,FLG,FLT3,FOXP1,GLE1,GPR63,HSP90AA1,KCTD20,KMT2C,KMT2D,LZTR1,MDGA2,MGAM,MUC16,MUC6,NFE2L3,NOTCH1,OR52A5,PCDHGA2,PCDHGA9,PDCD1,PDGFRL,PHF14,POSTN,POU4F3,PPP1R3A,PROKR2,RIMBP2,RP1L1,SCN5A,SERINC2,SLC39A12,SLCO4C1,TENM4,TJP1,TNN,TNRC6A,TRIO,TTN,TUBA1A,TUBA1C,VRK2,WHAMM,WWOX,ZN…	65
Molecular and Cellular Functions | Physiological System Development and Function	Cell-To-Cell Signaling and Interaction,Nervous System Development and Function	synaptic transmission	Synaptic transmission	4.51e-07	2.07e-05	AGRN,AKAP9,AMH,CACNA2D3,CHRNA7,CHRNB4,CNTNAP2,DPP6,DRD2,EPHB2,ERC2,GABRG1,GRIN2A,HCN4,KALRN,MAPT,NLGN3,NRCAM,NRXN1,NSF,OPRK1,P2RX2,PARK7,PCDH17,PCDHB13,PDE4A,PNKD,PRKAR2A,RELN,RICTOR,RIMBP2,RIMS1,RTN4R,SHANK2,SLC6A2,SLC6A4,SNAP29,STON2,UCHL1,UNC13C,WNT5A	41
Diseases and Disorders	Cancer,Organismal Injury and Abnormalities	serous neoplasm	Serous neoplasm	4.56e-07	2.09e-05	ADCY2,AEBP1,AGBL4,ALDH7A1,ASB3/GPR75-ASB3,BNC1,BRPF3,CADPS2,CDH23,CDHR1,CDKN1A,CELSR3,CLDN5,CLTCL1,CNTNAP5,COL5A1,CRKL,CSMD1,DCAF1,DNAH11,DNAH3,DNAH5,DNAH7,DPP4,DPP6,EGFR,EP300,EPHB2,EXOC3L4,FAM153A/FAM153B,FBN3,FLG,FLT3,GEM,GPR75,GTF2IRD1,HSP90AA1,IFIH1,IGF2BP1,KALRN,KCNH5,KLHL5,KMT2C,KMT2D,MACROD1,MAP3K4,MPO,MUC16,MYO10,NCKAP5,NFE2L3,NLGN3,NOTCH1,NPAS3,NSD1,OBSCN,OSBPL2,P3H2,PCDH12,PCDHB12,PCDH…	89
Diseases and Disorders	Cancer,Gastrointestinal Disease,Hepatic System Disease,Organismal Injury and Abnormalities	hepatocellular carcinoma	Hepatocellular carcinoma	4.61e-07	2.11e-05	ABCA7,ABCG8,ACAA1,ADAT1,ADCY2,ANKRD34C,ASH1L,BAZ2B,BIRC6,BMS1,C20orf204,CADM2,CASP8,CD276,CDH7,CDKN1A,CHST5,CLTCL1,CNTN6,COL4A2,COL5A1,COL6A6,COP1,CPS1,CSMD3,CXCL14,DBN1,DGCR8,DLC1,DLEC1,DNAH10,DNAH5,DNAH7,DPEP2,DPP6,EEF2,EFNA5,EGFR,ENO1,EP300,ERC2,ESR1,ETS1,FHIT,FLG,FLT3,FN1,GPR63,HGSNAT,HPD,HRH2,HSP90AA1,IGF2BP1,KALRN,KCTD20,KIF20B,KIF26B,KLB,KMT2C,KMT2D,LTBP1,LY75,LY75-CD302,MAP3K4,MCHR2,MCRS1…	121
Diseases and Disorders	Cancer,Organismal Injury and Abnormalities,Renal and Urological Disease	neoplasia	Bladder tumor	4.65e-07	2.12e-05	ABCA2,ABCB9,ABCC1,ABCC6,ADAMTS6,AEBP1,AFF3,ALPK3,ASH1L,BIRC6,CACNA1I,CACNA1S,CACNA2D3,CADPS2,CALN1,CAPN6,CARF,CASP8,CCDC71,CDH7,CDKN1A,CELSR3,CENPT,CEP128,CHRNA7,CHRNB4,CLCA1,CNTNAP2,COL6A3,COMT,CPS1,CSMD1,DAGLA,DHDDS,DLC1,DLX6,DNAH3,DNAH5,DNAJC13,DOP1B,EGFR,EP300,EPB41,EPSTI1,ESS2,FBN2,FBN3,FLG,FLT3,FN1,GABRA2,GNB1L,GPRIN1,GRIN2A,GTF2IRD1,GTF3A,HCN1,HSP90AA1,HTRA3,IGSF10,KALRN,KAT14,KCNH5,KCNH7,…	152
Physiological System Development and Function	Behavior	conditioning	Conditioning	4.77e-07	2.17e-05	ABI2,CARF,CNTNAP2,CRHR1,CSMD1,DBN1,DRD2,ESR1,GABRA2,GCG,GRIN2A,GTF2IRD1,HCN1,HOMER2,KALRN,KLB,MAPT,NAT8L,NLGN3,OPRD1,OPRK1,OPRM1,PDE6B,PREX1,RIMS1,SLC6A4,TBR1,TIMP2,VGF,WWC1	30
Diseases and Disorders | Physiological System Development and Function	Nervous System Development and Function,Neurological Disease,Organismal Injury and Abnormalities	abnormal morphology	Abnormal morphology of nervous system	4.93e-07	2.23e-05	ABCA2,ABI2,AGRN,ANK3,ATN1,CACNA1D,CADPS2,CASP8,CCDC134,CD47,CDH23,CELSR3,CHRNA7,CKB,CLCN2,CNTN6,CNTNAP2,CPT1C,CRKL,CX3CL1,DAGLA,DBN1,DCC,DRD2,EFNA5,EGFR,EPHB2,ERC2,ESR1,FFAR3,FGF17,GABRB3,GPR37,HDC,HEXB,HIRA,KALRN,KIDINS220,LMO4,MANBA,MAPK3,MAPT,NCKIPSD,NKX2-2,NOTCH1,NPAS3,NR1H2,NR4A2,NRCAM,PARK7,PEX11B,PEX2,PHOX2B,POLG,POU3F2,POU4F2,POU4F3,PROKR2,RIMS1,RTN4R,SEPTIN5,SERPINE2,SHANK2,SLC4A10,SLC6A…	81
Physiological System Development and Function	Organismal Development	morphology	Morphology of head	4.99e-07	2.26e-05	ABCC6,ABI2,ANK3,AQP5,ATN1,CADPS2,CASP8,CCDC134,CDC45,CDH23,CDHR1,CDKN1A,CELSR3,CHRNA7,CHRNB4,CHST6,CKB,CLCN2,CNTN6,CNTNAP2,COL8A1,CRKL,CX3CL1,DBN1,DCC,DRD2,EFNA5,EGFR,EP300,EPHB2,ERC2,ESR1,FGF17,GABRB3,GAK,GPR37,GTF2IRD1,HDC,HEXB,HIRA,KALRN,KIDINS220,LMO4,LOXL1,MANBA,MAPT,MYO10,NIPBL,NLGN3,NOTCH1,NPAS3,NR1H2,NR4A2,NRCAM,OPRD1,OPRK1,OPRM1,PARK7,PCM1,PDE6B,PEX11B,PEX2,POLE,POSTN,POU3F2,POU4F2,POU4F…	101
Diseases and Disorders	Organismal Injury and Abnormalities,Psychological Disorders	tobacco-related disorder	Tobacco-related disorder	5.06e-07	2.28e-05	CACNA1I,CHRNA7,CHRNB4,EGFR,GABRA2,GABRB3,GABRG1,NRXN1,OPRD1,OPRK1,OPRM1,SCN5A,SLC6A2,SLC6A4	14
Diseases and Disorders	Cancer,Organismal Injury and Abnormalities	connective tissue tumor	Connective tissue tumor	5.19e-07	2.33e-05	AGRN,ALKBH6,AP3B2,ASPN,ASTN2,BNC1,CACNA1I,CACNA1S,CDKN1A,CENPT,CHRNA7,CNTN6,CNTNAP2,COL4A2,COL5A1,COL6A3,COL8A1,COL9A2,CORO7/CORO7-PAM16,CPS1,CRKL,CSMD3,CTNNA3,DBN1,DLC1,DLEC1,DNAH3,DNAH5,DOP1B,DPP6,DYNC2H1,EGFR,EPHB2,ERCC5,ESR1,FBN2,FBN3,FLT3,FN1,FSCB,GABRA2,HIRA,HOXB4,HSP90AA1,ICE1,INO80D,KIDINS220,KLB,KMT2C,KMT2D,KMT5A,LAMA5,LINGO1,LRPPRC,MAP3K4,MINAR1,MRTFA,MTUS2,MUC16,MUC6,MYT1L,NAPSA,NCKAP5…	121
Diseases and Disorders	Organismal Injury and Abnormalities	cancer pain	Cancer pain	5.2e-07	2.33e-05	GRIN2A,OPRD1,OPRK1,OPRM1,SCN5A,SLC6A2,SLC6A4,WNT5A	8
Diseases and Disorders	Hereditary Disorder,Neurological Disease,Organismal Injury and Abnormalities,Psychological Disorders,Skeletal and Muscular Disorders	Huntington disease	Huntington Disease	5.24e-07	2.34e-05	ADCY2,AEBP1,AHCY,ATP5IF1,BCL7A,BHLHE40,CAB39,CACNA2D3,CASP8,CD160,CHGB,CKB,CPNE5,CX3CL1,DBN1,DIO2,DRD2,EPB41,EPHB2,FFAR3,FOXP1,GABRA2,GABRB3,GABRG1,GPR37,GRIN2A,GTF3A,HSP90AA1,ICA1,IFIH1,IMPA1,INO80D,IP6K2,KCNH7,KCNIP4,LINGO1,MPRIP,MYT1L,NDUFA13,NDUFA4,NDUFA6,NDUFB1,NFE2L3,NGEF,NRXN1,OPRD1,OPRK1,OPRM1,PCDH7,PDE6B,PDLIM7,PFKM,PIAS3,PLEK,POLR2I,PPP1R3A,PREPL,RANBP1,RBFOX1,RCAN1,RERE,SCN5A,SEPTIN5,S…	71
Physiological System Development and Function	Nervous System Development and Function,Tissue Morphology	morphology	Morphology of nervous tissue	5.46e-07	2.44e-05	ABCA2,ABI2,AGRN,ATN1,CACNA1D,CACNA2D3,CADPS2,CASP8,CD47,CDH23,CELSR3,CHRNA7,CKB,CLCN2,CNTN6,CNTNAP2,CPT1C,CRHR1,CX3CL1,DBN1,DRD2,EGFR,EPHB2,ERC2,ESR1,FARP2,FGF17,HEXB,KALRN,KIDINS220,KLC1,LINGO1,MANBA,MAPK3,MAPT,NCKIPSD,NEO1,NKX2-2,NLGN3,NOTCH1,NR1H2,NR4A2,NRCAM,PARK7,PEX2,PHOX2B,POLG,POU3F2,POU4F3,PROKR2,RCAN1,RICTOR,RIMS1,RTN4R,SEPTIN5,SERPINE2,SHANK2,SLC39A12,SLC6A4,SORT1,SPRY2,STON2,TBR1,TENM…	72
Diseases and Disorders | Physiological System Development and Function	Nervous System Development and Function,Neurological Disease,Organismal Injury and Abnormalities	abnormal morphology	Abnormal morphology of central nervous system	5.54e-07	2.46e-05	ABI2,ANK3,CADPS2,CCDC134,CELSR3,CHRNA7,CKB,CLCN2,CNTN6,CNTNAP2,CX3CL1,DBN1,DCC,EFNA5,EGFR,EPHB2,ESR1,FGF17,GABRB3,GPR37,HDC,HEXB,HIRA,KALRN,KIDINS220,MANBA,MAPT,NKX2-2,NOTCH1,NPAS3,NR1H2,NR4A2,NRCAM,PARK7,PEX11B,PEX2,POU3F2,POU4F2,PROKR2,RIMS1,RTN4R,SERPINE2,SHANK2,SLC4A10,SLC6A4,SPAG17,TBR1,TCOF1,TENM2,TOR1A,TRIO,WNT1,XRCC6	53
Diseases and Disorders	Organismal Injury and Abnormalities,Renal and Urological Disease	renal lesion	Renal lesion	5.8e-07	2.57e-05	ABCB9,ADAM23,ADCY2,ADM,AKAP9,ALDH7A1,ARHGAP26,ATP5IF1,BHLHE40,BRPF3,BST1,CACNA1S,CADM2,CD276,CDH23,CDKN1A,CLCA1,CLCN2,COL6A3,CORO7/CORO7-PAM16,CSMD1,CSMD3,CXXC4,DCC,DGCR6/LOC102724770,DGCR8,DLC1,DLX6,DNAH7,DPP6,DPP7,DSTYK,DUSP6,EDC4,EGFR,EMB,EP300,EPHB2,ERCC5,ESR1,FBN2,FBXL17,FLG,FLT3,FN1,GABARAPL2,GABPB1,GABRA2,GABRB3,GABRG1,GNPDA2,GPRIN1,GRIN2A,GUF1,HCN4,HNRNPLL,HSP90AA1,IGSF10,IGSF3,KDM5B,KMT2…	138
Diseases and Disorders	Cancer,Hematological Disease,Immunological Disease,Organismal Injury and Abnormalities	non-Hodgkin disease	Non-Hodgkin lymphoma	5.85e-07	2.59e-05	ABCA7,ABCC1,ABCC6,ADAMTS6,ADSL,AGBL4,AGRN,AIFM3,ANK3,ARHGEF3,ARHGEF33,ATN1,BAZ2B,BBX,BCL7A,BIRC6,CACNA1D,CASP8,CD47,CDH7,CDHR1,CDKN1A,CLCA4,CNTN6,CNTNAP4,CNTNAP5,COL4A2,COMT,CRHR1,CSMD1,CSMD3,CXCL14,DCC,DIABLO,DNAH5,DOP1B,DPP4,DRD2,EDC4,EGFR,EP300,ERC2,ETS1,FBN2,FHIT,FLG,FLT3,FN1,FOXP1,GPRIN1,HSP90AA1,IGSF3,IMMP2L,JUND,KALRN,KLC1,KMT2C,KMT2D,L3MBTL2,LAPTM5,LOXL1,MAPK3,MCRS1,MDGA2,MGAM,MTUS2,MUC16…	122
Physiological System Development and Function	Nervous System Development and Function	prepulse inhibition	Prepulse inhibition	6.07e-07	2.68e-05	ARL8B,CNTNAP2,DBN1,DRD2,GNB1L,HDC,KALRN,MAPT,NLGN3,NRCAM,NRXN1,RIMS1,SEPTIN5,SLC6A4,TBX1,TIMP2,ZDHHC8	17
Diseases and Disorders	Cancer,Organismal Injury and Abnormalities	serous adenocarcinoma	Serous adenocarcinoma	6.41e-07	2.82e-05	ADCY2,AEBP1,AGBL4,ALDH7A1,ASB3/GPR75-ASB3,BNC1,BRPF3,CADPS2,CDH23,CDHR1,CDKN1A,CELSR3,CLDN5,CLTCL1,CNTNAP5,COL5A1,CRKL,CSMD1,DCAF1,DNAH11,DNAH3,DNAH5,DNAH7,DPP4,DPP6,EGFR,EP300,EPHB2,EXOC3L4,FAM153A/FAM153B,FBN3,FLG,FLT3,GEM,GPR75,GTF2IRD1,HSP90AA1,IFIH1,IGF2BP1,KALRN,KCNH5,KLHL5,KMT2C,KMT2D,MACROD1,MPO,MUC16,MYO10,NCKAP5,NFE2L3,NLGN3,NOTCH1,NPAS3,NSD1,OBSCN,OSBPL2,P3H2,PCDH12,PCDHB12,PCDHGA2,PCD…	88
Diseases and Disorders	Hereditary Disorder,Neurological Disease,Organismal Injury and Abnormalities	encephalopathy	Autosomal dominant encephalopathy	6.9e-07	3.03e-05	ABCA7,ALDH18A1,ASH1L,ATN1,BCL11A,CEP85L,CLCN2,CPT1C,DAGLA,DNAJC13,DPP6,EEF2,EP300,FOXP1,GABRA2,GABRB3,GRIN2A,HCN1,KANSL1,KCNC3,KIDINS220,KMT2C,KMT2D,MAPT,MPO,MYT1L,NIPA1,NPRL2,NSD1,PDE6B,PIAS3,PPP2R2B,RELN,SCN5A,TBX1,TNRC6A,TRIO,TUBA1A,UCHL1,ZBTB20	40
Diseases and Disorders	Cancer,Organismal Injury and Abnormalities,Renal and Urological Disease	upper renal tract carcinoma	Upper renal tract carcinoma	7.39e-07	3.23e-05	ABCB9,ADAM23,ADCY2,ADM,AKAP9,ALDH7A1,ARHGAP26,ATP5IF1,BHLHE40,BRPF3,BST1,CACNA1S,CADM2,CDH23,CDKN1A,CLCA1,CLCN2,CORO7/CORO7-PAM16,CSMD1,CSMD3,CXXC4,DGCR6/LOC102724770,DLC1,DLX6,DNAH7,DPP6,DPP7,DUSP6,EDC4,EGFR,EMB,EP300,EPHB2,ERCC5,ESR1,FBN2,FBXL17,FLG,FLT3,FN1,FOXP1,GABARAPL2,GABPB1,GABRA2,GABRB3,GABRG1,GNPDA2,GPRIN1,GRIN2A,GUF1,HCN4,HNRNPLL,HSP90AA1,IGSF10,IGSF3,KDM5B,KMT2C,KMT2D,LAMA5,MAP3K4,MA…	122
Diseases and Disorders	Organismal Injury and Abnormalities	backache	Backache	7.47e-07	3.26e-05	CACNA2D3,COMT,DRD2,GABRA2,GABRB3,GABRG1,GRIN2A,HRH2,OPRD1,OPRK1,OPRM1,PDE4A,SCN5A,SLC6A2,SLC6A4	15
Diseases and Disorders	Infectious Diseases,Organismal Injury and Abnormalities	infection	Viral Infection	7.71e-07	3.35e-05	ACTR3,ADM,ANK3,APOM,ARVCF,ATP5IF1,BCL11A,CACNA1D,CACNA1I,CACNA1S,CACNA2D3,CAMK1D,CAPN6,CCDC134,CDKN1A,CELSR3,CHADL,CHMP1A,CHRNA7,CHRNB4,CHST5,CHST6,CLDN5,CLTCL1,COL5A1,CSDC2,CX3CL1,DBN1,DCAF1,DGCR8,DPP4,DRD2,DYNC2H1,DYSF,EEF2,EGFR,EP300,EPHB2,EPSTI1,ERCC5,ESR1,ETS1,FAM153A/FAM153B,FLG,FN1,FPR1,FPR3,GABARAPL2,GABPB1,GABRA2,GABRB3,GABRG1,GAK,GPLD1,GRIN2A,GTF2A1,GTF2H1,HIRA,HMGN2,HRH2,HSP90AA1,IFIH1…	156
Molecular and Cellular Functions	Cellular Movement	cell movement	Cell movement of brain cells	7.82e-07	3.39e-05	CADPS2,CELSR3,CX3CL1,DGCR8,EPHB2,FN1,LMO4,NOTCH1,NRCAM,POU3F2,PREX1,RELN,RERE,ROBO3,SDC3,TBR1,TRIO,TUBA1A	18
Diseases and Disorders	Organismal Injury and Abnormalities,Psychological Disorders	suicidal ideation	Suicidal ideation	7.86e-07	3.4e-05	DRD2,ESR1,GABRA2,GABRG1,GRIN2A,OPRD1,OPRK1,OPRM1,SLC6A2,SLC6A4	10
Molecular and Cellular Functions | Physiological System Development and Function	Cell Morphology,Cellular Assembly and Organization,Cellular Development,Cellular Function and Maintenance,Cellular Growth and Proliferation,Nervous System Development and Function,Organismal Development,Tissue Development	axonogenesis	Axonogenesis	8.52e-07	3.68e-05	ACTR3,AGRN,ANK3,CNTNAP2,DCC,DRD2,EFNA5,EPHB2,HRH2,HSP90AA1,KALRN,MAPT,MYO10,NOTCH1,POU3F2,POU4F2,POU4F3,PTBP2,RELN,RICTOR,RIMS1,ROBO3,RTN4R,SEMA3E,SLITRK1,TENM4,TNN,UCHL1,WNT5A,ZDHHC17,ZDHHC8	31
Physiological System Development and Function	Nervous System Development and Function,Tissue Morphology	quantity	Quantity of neurons	9.13e-07	3.93e-05	ACTR3,AGRN,ANK3,ATN1,CACNA1D,CADPS2,CDH23,CDKN1A,CELSR3,CNTNAP2,CX3CL1,DCC,DRD2,EGFR,EPHB2,ERC2,ESR1,GCG,HDC,KALRN,KIDINS220,MAP3K4,MAPT,NAT8L,NKX2-2,NLGN3,NOTCH1,NR1H2,NR4A2,NRCAM,PCDH17,PCDHGA2,PCDHGA9,PDCD1,POU4F2,POU4F3,PTPRN2,RELN,RERE,RIMS1,RTN4R,SDC3,SLC6A2,SPRY2,STING1,STON2,SULT4A1,TBR1,TRIP6,VGF,WNT5A	51
Diseases and Disorders	Gastrointestinal Disease,Organismal Injury and Abnormalities	gastroesophageal reflux	Gastroesophageal reflux	9.4e-07	4.03e-05	CDX2,DPP7,DRD2,GABRA2,GABRB3,GABRG1,HEXB,HRH2,MANBA,SLC6A2,SLC6A4	11
Diseases and Disorders	Dermatological Diseases and Conditions,Infectious Diseases,Organismal Injury and Abnormalities	herpes zoster	Herpes zoster	1.02e-06	4.36e-05	OPRD1,OPRK1,OPRM1,POLD1,POLG,SLC6A2,SLC6A4	7
Diseases and Disorders	Cancer,Organismal Injury and Abnormalities,Respiratory Disease	laryngeal squamous cell carcinoma	Laryngeal squamous cell carcinoma	1.06e-06	4.54e-05	CDX2,CELSR3,CNTNAP4,CNTNAP5,COL5A1,CPT1C,CSMD3,CTNNA3,DCC,DLC1,DNAH5,DNAH7,EGFR,ERCC5,FBN2,HSP90AA1,KMT2D,KMT5A,LAMA5,LRPPRC,LRRC14,MDGA2,MUC16,MYT1L,NINL,NPAS3,NRXN1,OPA1,PAN3,PCDH11X,PCDH12,PCDH17,PCDHAC1,PCDHGA2,PCDHGA9,PCM1,PDCD1,PTPRU,RASGEF1A,RIMBP2,RP1L1,RRM1,SORCS3,SPAG17,STARD9,TNIK,TNRC6A,TTC27,TTN,TUBA1A,TUBA1C,VWC2,WDPCP,ZNF560,ZNF613	55
Molecular and Cellular Functions	Cell Morphology,Cellular Development	branching	Branching of cells	1.08e-06	4.59e-05	ACTR3,ADM,AGRN,CDKN1A,CHRNA7,CNTNAP2,CPT1C,CRHR1,DBN1,DCC,DRD2,EFNA5,EPHB2,ERC2,ETS1,FN1,GABRB3,GEM,IGF2BP1,KALRN,KIDINS220,MAPK3,MAPT,MYO10,NEO1,NLGN3,NOTCH1,NRCAM,OPA1,OPRM1,PAM,PKP4,RELN,RIMS1,SEMA3E,SHANK2,SULT4A1,TEK,TIMP2,TMEM67,TNN,TRIO,UCHL1,VAMP7,VGF,WNT5A,ZDHHC8	47
Molecular and Cellular Functions | Physiological System Development and Function	Cell-To-Cell Signaling and Interaction,Nervous System Development and Function	action potential	Action potential of cells	1.09e-06	4.61e-05	AMH,ANK3,CACNA1D,CACNA1I,CD47,CHRNA7,CHRNB4,CNTNAP2,DPP6,EPB41,GRIN2A,HCN1,KCNC3,KCNJ11,KCNMB3,OPRM1,P2RX2,PARK7,RIMS1,SCN5A,SERPINE2,SHANK2,SLC6A4	23
Physiological System Development and Function	Behavior	vocalization	Vocalization	1.14e-06	4.81e-05	CNTNAP2,DRD2,GTF2IRD1,MAPT,NLGN3,NLGN4X,NRXN1,PREX1,SHANK2,TBR1,TBX1,TOR1A	12
Diseases and Disorders	Hereditary Disorder,Neurological Disease,Organismal Injury and Abnormalities,Psychological Disorders	familial schizophrenia	Familial schizophrenia	1.17e-06	4.93e-05	CHRNA7,COMT,CSMD1,DRD2,LOC102724788/PRODH,NPAS3,NRXN1,RBFOX1,RELN,RTN4R,TENM4	11
Diseases and Disorders	Neurological Disease,Organismal Injury and Abnormalities,Psychological Disorders	schizoaffective disorder	Schizoaffective disorder	1.23e-06	5.2e-05	CACNA1I,CHRNA7,CHRNB4,CNTNAP2,DRD2,ESR1,GABRA2,GABRB3,GABRG1,GRIN2A,HRH2,OPRD1,OPRK1,OPRM1,RGS12,SCN5A,SLC6A2,SLC6A4	18
Diseases and Disorders	Cancer,Endocrine System Disorders,Organismal Injury and Abnormalities	anaplastic thyroid carcinoma	Anaplastic thyroid carcinoma	1.29e-06	5.41e-05	ABCC1,AIFM3,CASP8,CD276,CD47,CHST6,COL5A1,CORO7/CORO7-PAM16,CSMD1,DIO2,DNAH10,DNAH5,EDC4,EGFR,ENO1,EPHB2,FLT3,FN1,GABRB3,GPR149,HSP90AA1,KCNH7,MACROD1,MAP3K4,MEI1,NSD3,OAS3,PARK7,PCDHGA2,PDCD1,PKP4,SLC26A2,SLC4A10,TRIO,TUBA1A,TUBA1C	36
Diseases and Disorders	Organismal Injury and Abnormalities,Psychological Disorders	non-affective psychosis	Non-affective psychosis	1.4e-06	5.86e-05	CHRNA7,COMT,DRD2,ESR1,GABRA2,GABRB3,GABRG1,GRIN2A,NPAS3,OPRD1,OPRK1,OPRM1,SLC6A4	13
Molecular and Cellular Functions | Physiological System Development and Function	Cellular Growth and Proliferation,Tissue Development	proliferation	Proliferation of neural cells	1.42e-06	5.92e-05	AGRN,ANK3,CD47,CDKN1A,CNTNAP2,CPEB1,CX3CL1,DAGLA,DCC,DRD2,EGFR,EIF2B2,EP300,EPHB2,ESR1,FARP2,FN1,FPR2,GAK,GPRIN1,IGF2BP1,IMPA1,KALRN,LINGO1,MAPK3,MAPT,MPRIP,MYO10,NCL,NEGR1,NEO1,NGEF,NOTCH1,NPAS3,NR1H2,NRCAM,NRXN1,OPRD1,PDE4A,PHOX2B,PKP4,POU4F2,POU4F3,PPP1R3A,PROKR2,PRPH,PTBP2,RELN,RTN4R,SDC3,SEL1L,SERPINE2,SGPP2,SLC39A12,SPRY2,TCOF1,TEK,THBS1,TIMP2,TNN,TRIO,TUBA1A,VAMP7,VGF,WDR62,WNT1,WNT3,WNT5A…	70
Diseases and Disorders	Cancer,Organismal Injury and Abnormalities,Skeletal and Muscular Disorders	muscle tumor	Muscle tumor	1.46e-06	6.1e-05	ABI2,AGRN,ASPN,CACNA1S,CAPN6,CDKN1A,CENPT,CLDN5,CNTN6,COL5A1,COL6A3,CRKL,CTNNA3,CXCL14,DLEC1,DOP1B,DPP6,EGFR,ERCC5,ESR1,FLT3,FN1,FSCB,HAUS3,ICE1,IFIH1,INO80D,KLB,KMT2C,KMT2D,KMT5A,LAMA5,LRPPRC,LTBP1,MAPK3,MAU2,MDH1,MGST1,MINAR1,MUC6,NCKAP5L,NEGR1,NINL,NOTCH1,NR1H2,NR4A2,NSD1,OBSCN,OLFM1,PCDHGA2,PCDHGA9,PI4KA,POSTN,RERE,RP1L1,RRM1,RUNX1T1,SCN5A,SF3A2,SORCS3,STING1,TEK,TGFBRAP1,TJP1,TTN,TUBA1A,TUBA…	70
Diseases and Disorders	Hereditary Disorder,Neurological Disease,Organismal Injury and Abnormalities	autosomal recessive neurological disorder	Autosomal recessive neurological disorder	1.48e-06	6.17e-05	ABCA2,ACO2,AGRN,ALDH18A1,ALDH7A1,ANK3,AP3B2,CACNA1D,CDH23,CHMP1A,CHRNA7,CLCN2,CNTNAP2,COL5A1,COL6A3,COL8A1,CXCL14,DCC,DSTYK,DYSF,EIF2B2,EP300,ERCC5,ESR1,GLE1,GRIN2A,GUF1,HS2ST1,IMPA1,KARS1,KDM5B,LINGO1,LRPPRC,LZTR1,MAPT,MECR,MPO,MPV17,MRPL3,MTRFR,NARS2,NRXN1,OPA1,PARK7,PCDH12,PI4KA,PIGW,POLG,POLR3H,POSTN,POU4F3,PREPL,RAB18,RELN,ROBO3,SCAPER,SLC25A1,SLC30A9,SLC45A1,SLC6A2,SLC6A4,SNAP29,ST3GAL3,TAN…	75
Molecular and Cellular Functions	Cell Morphology,Cellular Function and Maintenance	length	Length of cells	1.56e-06	6.46e-05	CRHR1,DBN1,DRD2,ESR1,FARP2,KALRN,LINGO1,MAPT,NEB,NEO1,RCAN1,RICTOR,RTN4R,SLC39A12,TENM4,TIMP2,TRIO,TRIP6,WNT5A,ZBTB20	20
Diseases and Disorders	Neurological Disease,Organismal Injury and Abnormalities,Psychological Disorders	bipolar disorder	Bipolar disorder	1.61e-06	6.65e-05	ADCY2,ANK3,CACNA1I,CAPN6,CD47,CHRNA7,COMT,DIABLO,DRD2,GABRA2,GABRB3,GABRG1,GRIN2A,HRH2,MRPL3,OPRD1,OPRK1,OPRM1,POU3F2,PSKH1,PTPRU,RELN,RIMS1,SCN5A,SHANK2,SLC6A2,SLC6A4,SPRY2,STARD9,TBR1,TENM4,VGF	32
Diseases and Disorders	Cancer,Hematological Disease,Immunological Disease,Organismal Injury and Abnormalities	lymphocytic leukemia	Lymphocytic leukemia	1.65e-06	6.81e-05	ADCY2,ANK3,ARHGAP26,ARHGEF33,ARVCF,ASTN2,BBX,CACNA1I,CADPS2,CCDC66,CD160,CDH7,CDKN1A,CHST6,CLCA1,CLCA4,CNTN6,CNTNAP2,CNTNAP4,CNTNAP5,COL6A3,CPNE5,DAGLA,DGCR2,DHX57,DLC1,DNAH3,DNAH5,DNAH7,DOP1B,DPP4,EGFR,EP300,ERC2,FBN2,FBN3,FLG,FLT3,FSCB,GEM,GRIN2A,GTF2IRD1,HSP90AA1,IGF2BP1,IL17RB,KLHL38,KMT2C,KMT2D,LINGO1,LIX1L,LTBP1,LZTR1,MACROD1,ME2,MUC16,NAT8L,NGEF,NIPBL,NOTCH1,NRCAM,NRXN1,OPA1,OPRD1,OR52A5,P…	109
Diseases and Disorders	Cancer,Organismal Injury and Abnormalities,Renal and Urological Disease	kidney carcinoma	Kidney carcinoma	1.68e-06	6.92e-05	ABCB9,ADAM23,ADCY2,ADM,AKAP9,ALDH7A1,ARHGAP26,ATP5IF1,BHLHE40,BRPF3,BST1,CACNA1S,CADM2,CDH23,CDKN1A,CLCA1,CLCN2,CORO7/CORO7-PAM16,CSMD1,CSMD3,CXXC4,DGCR6/LOC102724770,DLC1,DLX6,DNAH7,DPP6,DPP7,DUSP6,EDC4,EGFR,EMB,EP300,EPHB2,ERCC5,ESR1,FBN2,FBXL17,FLG,FLT3,FN1,GABARAPL2,GABPB1,GABRA2,GABRB3,GABRG1,GNPDA2,GPRIN1,GRIN2A,GUF1,HCN4,HNRNPLL,HSP90AA1,IGSF10,IGSF3,KDM5B,KMT2C,KMT2D,LAMA5,MAP3K4,MAU2,MIN…	120
Molecular and Cellular Functions | Physiological System Development and Function	Cell Morphology,Nervous System Development and Function,Tissue Morphology	morphology	Morphology of neurons	1.74e-06	7.13e-05	ABI2,AGRN,ATN1,CACNA1D,CACNA2D3,CADPS2,CASP8,CD47,CDH23,CHRNA7,CKB,CNTN6,CNTNAP2,CPT1C,CRHR1,CX3CL1,DBN1,DRD2,EPHB2,ERC2,ESR1,FARP2,FGF17,HEXB,KALRN,KIDINS220,KLC1,LINGO1,MANBA,MAPK3,MAPT,NCKIPSD,NEO1,NKX2-2,NLGN3,NR1H2,NR4A2,NRCAM,PARK7,PEX2,PHOX2B,POLG,POU3F2,POU4F3,PROKR2,RCAN1,RICTOR,RIMS1,RTN4R,SEPTIN5,SHANK2,SLC39A12,SLC6A4,SORT1,SPRY2,STON2,TENM4,TIMP2,TRAF3,TRIO,TRIP6,TUBA1A,VPS13A,WNT5A,…	65
Diseases and Disorders	Cancer,Gastrointestinal Disease,Hepatic System Disease,Organismal Injury and Abnormalities	biliary tract carcinoma	Biliary tract carcinoma	1.87e-06	7.64e-05	AGBL4,ALDH7A1,ANK3,ASPN,ATN1,B3GNT4,BMS1,CDX2,CHDH,CHST6,CLCA1,CLCA4,CLTCL1,COL5A1,CSMD1,CSMD3,CTRL,DCAF1,DCC,DNAH10,DNAJC13,DYNC2H1,EGFR,ESR1,FBN2,GABPB1,GABRB3,GOLGA6L9 (includes others),GPRIN1,GUF1,HPD,HSP90AA1,IGSF3,KCNH3,KCNH5,KCTD20,KIF20B,KMT2C,KMT2D,LIMCH1,LIX1L,LMBR1L,LOXL1,MAP3K4,MAPT,MUC16,NEB,NFE2L3,NLGN4X,NOTCH1,NR1H2,NR4A2,NSD1,NUTF2,OAS3,OPRK1,PCDH12,PCDHGA2,PDCD1,PHC3,PHF2,PIKFYVE…	89
Diseases and Disorders	Cancer,Organismal Injury and Abnormalities,Reproductive System Disease	malignant mixed Mullerian tumor	Malignant mixed Mullerian tumor in endometrium	2.06e-06	8.41e-05	ALKBH6,AP3B2,BNC1,CACNA1I,CHRNA7,CNTN6,CNTNAP2,CORO7/CORO7-PAM16,CSMD3,DBN1,DNAH3,DNAH5,DYNC2H1,ESR1,FBN2,FBN3,FSCB,GABRA2,HIRA,HOXB4,KIDINS220,LAMA5,MAP3K4,MTUS2,MUC16,MUC6,MYT1L,NAPSA,NINL,NRXN1,PCDH11X,PCDHGA2,PCDHGA9,PHF14,PKN2,PRSS3,PTBP2,RANBP10,RP1L1,SCAPER,SELE,SEMA3E,SERINC2,SHANK2,SLC4A10,SLCO6A1,SOS1,TJP1,TNFAIP2,TNKS1BP1,TTN,UNC13C,ZDHHC11,ZNF382,ZNF536	55
Diseases and Disorders	Cancer,Hematological Disease,Immunological Disease,Organismal Injury and Abnormalities	B-cell leukemia	B-cell leukemia	2.07e-06	8.44e-05	ADCY2,ANK3,ARHGEF33,ARVCF,ASTN2,BBX,CACNA1I,CCDC66,CD160,CDH7,CDKN1A,CLCA4,CNTN6,CNTNAP2,CNTNAP4,CNTNAP5,COL6A3,CPNE5,DGCR2,DHX57,DLC1,DNAH5,DNAH7,DOP1B,EGFR,EP300,ERC2,FBN2,FBN3,FLG,FLT3,FSCB,GEM,GRIN2A,GTF2IRD1,KMT2D,LIX1L,LTBP1,LZTR1,MACROD1,ME2,NGEF,NIPBL,NOTCH1,NRXN1,OPRD1,PCDH7,PCDHGA2,PCDHGA9,PDCD1,PDE9A,PIM1,PLEK2,POLD1,POLE,POLG,POSTN,POU4F2,PPP1R3A,PTPRU,RBM12B,RELN,RNF215,RNF41,ROBO3,R…	81
Diseases and Disorders	Cancer,Gastrointestinal Disease,Hepatic System Disease,Organismal Injury and Abnormalities	bile duct carcinoma	Bile duct carcinoma	2.2e-06	8.94e-05	AGBL4,ALDH7A1,ANK3,B3GNT4,BMS1,CDX2,CHST6,CLCA4,CSMD1,CSMD3,CTRL,DCAF1,DNAH10,DNAJC13,DYNC2H1,EGFR,ESR1,GABPB1,GABRB3,GOLGA6L9 (includes others),GPRIN1,GUF1,HPD,HSP90AA1,IGSF3,KCNH3,KCNH5,KCTD20,KIF20B,KMT2C,KMT2D,LIMCH1,LIX1L,LMBR1L,MAP3K4,NEB,NFE2L3,NLGN4X,NOTCH1,NR1H2,NR4A2,NUTF2,OPRK1,PCDH12,PCDHGA2,PDCD1,PHF2,PIKFYVE,POLE,PPP1R3A,PSME4,RICTOR,RP1L1,RRM1,SCARF2,SEL1L,SEL1L3,SLCO6A1,THBS1,TLN2…	72
Physiological System Development and Function	Behavior	vertical rearing	Vertical rearing	2.32e-06	9.39e-05	ABCA2,DRD2,ESR1,GABRB3,GRIN2A,HEXB,HRH2,IMPA1,KCNJ11,NAT8L,NRCAM,OPRM1,PARK7,PCM1,RTN4R,STON2	16
Diseases and Disorders	Cancer,Gastrointestinal Disease,Organismal Injury and Abnormalities	gastroesophageal junction adenocarcinoma	Gastroesophageal junction adenocarcinoma	2.42e-06	9.8e-05	BST1,CD47,EEF2,EGFR,GRIN2A,GUF1,HSP90AA1,IGSF3,KMT2C,LOXL1,OBSCN,PDCD1,POLD1,POLE,PRB1/PRB2,RELN,RERE,RIMBP2,SCN5A,SLC23A2,TEK,TTN,TUBA1A,TUBA1C,UNC13C	25
Diseases and Disorders	Cancer,Hematological Disease,Immunological Disease,Organismal Injury and Abnormalities	B-cell neoplasm	B-cell neoplasm	2.51e-06	0.000101	ABCA7,ABCC1,ADCY2,ADSL,AGBL4,ANK3,ARHGEF33,ARVCF,ASTN2,ATN1,BAZ2B,BBX,BCL11A,BCL7A,BIRC6,CACNA1I,CASP8,CCDC66,CD160,CD47,CDH7,CDKN1A,CLCA4,CNTN6,CNTNAP2,CNTNAP4,CNTNAP5,COL4A2,COL6A3,COMT,CPNE5,CSGALNACT2,CSMD1,DAGLA,DAP,DCC,DGCR2,DHX57,DIABLO,DLC1,DNAH3,DNAH5,DNAH7,DOP1B,DPP4,EDC4,EGFR,EMB,EP300,EPSTI1,ERC2,ETS1,FAM153A/FAM153B,FBN2,FBN3,FHIT,FLG,FLT3,FN1,FOXP1,FSCB,GEM,GPRIN1,GRIN2A,GTF2IRD1,HS…	162
Molecular and Cellular Functions	Cell Morphology	sprouting	Sprouting	2.64e-06	0.000106	ACTR3,ADM,AGRN,CDKN1A,CHRNA7,CNTNAP2,CPT1C,CRHR1,DBN1,DCC,DRD2,EFNA5,EMB,EPHB2,ERC2,ETS1,FN1,GABRB3,GEM,IGF2BP1,KALRN,KIDINS220,MAPK3,MAPT,MYO10,NEO1,NLGN3,NOTCH1,NRCAM,OPA1,OPRM1,PKP4,RELN,RIMS1,SEMA3E,SHANK2,SPRY2,SULT4A1,TEK,THBS1,TMEM67,TNN,TRIO,UCHL1,VAMP7,VGF,WNT5A,ZDHHC8	48
Diseases and Disorders	Cancer,Organismal Injury and Abnormalities,Renal and Urological Disease	renal cell cancer	Renal cell carcinoma	2.76e-06	0.000111	ABCB9,ADAM23,ADCY2,ADM,AKAP9,ALDH7A1,ARHGAP26,ATP5IF1,BHLHE40,BRPF3,BST1,CACNA1S,CADM2,CDH23,CDKN1A,CLCA1,CLCN2,CORO7/CORO7-PAM16,CSMD1,CSMD3,CXXC4,DGCR6/LOC102724770,DLC1,DLX6,DNAH7,DPP6,DPP7,DUSP6,EDC4,EGFR,EMB,EP300,EPHB2,ERCC5,ESR1,FBN2,FBXL17,FLG,FLT3,FN1,GABARAPL2,GABPB1,GABRA2,GABRB3,GABRG1,GNPDA2,GPRIN1,GRIN2A,GUF1,HCN4,HNRNPLL,HSP90AA1,IGSF10,IGSF3,KDM5B,KMT2C,KMT2D,LAMA5,MAP3K4,MAU2,MIN…	118
Molecular and Cellular Functions | Physiological System Development and Function	Cellular Development,Cellular Growth and Proliferation,Nervous System Development and Function,Tissue Development	proliferation	Proliferation of neuronal cells	2.77e-06	0.000111	AGRN,CD47,CDKN1A,CX3CL1,DAGLA,DCC,DRD2,EGFR,EIF2B2,EP300,EPHB2,ESR1,FARP2,FN1,GPRIN1,IGF2BP1,IMPA1,KALRN,LINGO1,MAPK3,MAPT,MPRIP,MYO10,NCL,NEGR1,NGEF,NOTCH1,NRCAM,NRXN1,OPRD1,PDE4A,PHOX2B,PKP4,POU4F2,POU4F3,PROKR2,PRPH,RELN,RTN4R,SERPINE2,SGPP2,SLC39A12,SPRY2,TCOF1,THBS1,TIMP2,TNN,TRIO,TUBA1A,VAMP7,VGF,WDR62,WNT1,WNT5A,WWOX,ZDHHC8	56
Diseases and Disorders	Cardiovascular Disease,Hereditary Disorder,Organismal Injury and Abnormalities	familial heart disease	Familial heart disease	2.87e-06	0.000114	AKAP9,ALPK3,CACNA1D,CEP85L,COL5A1,COMT,CRKL,CTNNA3,DGCR8,DLC1,DNAH1,DNAH5,DPP6,DRD2,FHL2,FOXP1,HCN4,KALRN,KMT2D,LTBP1,MACROD1,MRPL3,NOTCH1,OBSCN,RERE,SCN5A,SLC25A1,SLC6A2,SLC6A4,SOS1,TANGO2,TBX1,TEAD2,TJP1,TTN,TXNRD2,WDPCP	37
Diseases and Disorders	Connective Tissue Disorders,Inflammatory Disease,Inflammatory Response,Organismal Injury and Abnormalities,Skeletal and Muscular Disorders	osteoarthritis	Osteoarthritis	2.87e-06	0.000114	ADAMTS6,ASPN,ASTN2,CACNA1D,CACNA1S,CACNA2D3,CHADL,DRD2,ERRFI1,GABRA2,GABRB3,GABRG1,HRH2,LIMCH1,LTBP1,MTRFR,NR4A2,OPRD1,OPRK1,OPRM1,P3H2,PDCD1,POSTN,SBNO1,SCN5A,SDC3,SLC6A2,SLC6A4,TIMP2,TLN2,TUBA1A,TUBA1C,WNT10B,XYLT1	34
Diseases and Disorders	Cardiovascular Disease,Organismal Injury and Abnormalities	hypertension	Hypertension	3.02e-06	0.00012	ABCF2,ADM,AFF3,ARL8B,ASPN,CACNA1D,CACNA1S,CACNA2D3,CASP8,CCDC85A,CHRNA7,CHRNB4,CKB,CNTNAP2,CNTNAP5,COL8A1,COMT,CPS1,CRHR1,CX3CL1,CXXC4,DIO2,DRD2,EGFR,ESR1,FMO2,FOXP1,GABRA2,GABRB3,GABRG1,GRIN2A,IGSF10,IMMP2L,KCNJ11,KIF26B,LMO3,LRRC14,MESD,MGAM,MPO,MRTFA,MYO10,NAALAD2,NEGR1,NIPA1,NISCH,NOTCH1,NR1H2,NSD3,NUCB2,OPRM1,PCDH12,PDE4A,PIM1,POLD1,RBFOX1,ROBO3,RUNX1T1,SCN5A,SELE,SLC24A2,SLC43A1,SLC6A2,SLC6…	74
Diseases and Disorders	Cancer,Dermatological Diseases and Conditions,Hematological Disease,Immunological Disease,Organismal Injury and Abnormalities	Sézary syndrome	Sézary syndrome	3.16e-06	0.000125	ABCC6,ADAMTS6,AGRN,AIFM3,ANK3,ARHGEF33,BIRC6,CASP8,CDHR1,CNTN6,CNTNAP5,CRHR1,CSMD1,CSMD3,CXCL14,DNAH5,DPP4,DRD2,ERC2,FBN2,FLG,L3MBTL2,MGAM,MTUS2,OBSCN,PI16,PLCH1,PRSS3,RELN,RRM1,SLC6A4,SPINK5,TSPYL5	33
Diseases and Disorders	Organismal Injury and Abnormalities,Reproductive System Disease	disorder of pregnancy	Disorder of pregnancy	3.26e-06	0.000129	AADAC,ABCF2,ADM,ARHGAP26,ARL8B,ASPN,ATN1,BIRC6,CACNA1D,CACNA1S,CACNA2D3,CASP8,CCDC134,CCDC85A,CDX2,CKB,COL4A2,COL6A3,COL8A1,COMT,CRKL,CX3CL1,CXXC4,DRD2,DYSF,EGFR,ESR1,FMO2,FOXP1,GABRB3,GABRG1,GRIN2A,HSP90AA1,IGSF10,IMMP2L,KIF26B,KMT2C,LMO3,LRRC14,LY75,MECR,MEI1,MGAM,MPO,MYO10,NAALAD2,NEO1,NIPA1,NPAS3,NR1H2,NSD3,NUCB2,OPRD1,OPRM1,PCDH12,PDE4A,PPP2R2B,RICTOR,ROBO3,RUNX1T1,SDC3,SLC24A2,SLC43A1,SLC6A…	81
Diseases and Disorders	Cancer,Organismal Injury and Abnormalities,Respiratory Disease	lung squamous cell tumor	Lung squamous cell tumor	3.31e-06	0.00013	ATN1,BCL11A,BST1,CACNA1S,CALN1,CASP8,CDH7,CDKN1A,CNTNAP2,CNTNAP4,CNTNAP5,CPEB1,CPS1,CSMD1,CSMD3,DCC,DLC1,DLX6,DNAH10,DNAH5,DYSF,EGFR,EP300,FBN2,FLG,FLT3,FN1,FOXP1,GABRB3,HCN1,HSP90AA1,IQCK,KCNH5,KMT2C,KMT2D,MCHR1,MDH1,MEI1,MUC6,MYT1L,NAALAD2,NEB,NFE2L3,NOTCH1,NOTCH2NLA/NOTCH2NLB,NR1H2,NR4A2,NRXN1,NSD1,NSD3,NSF,OPA1,OR52A5,PABPC5,PCDH11X,PCDHGA2,PDCD1,PHF2,PHF3,PIKFYVE,PLCH1,POLD1,PRB1/PRB2,RELN,R…	79
Diseases and Disorders	Organismal Injury and Abnormalities,Reproductive System Disease	benign pelvic disease	Benign pelvic disease	3.43e-06	0.000135	ABI2,AGRN,ANK3,ARVCF,ASPN,BIRC6,CAPN6,CASP8,CDC45,CDH23,CLDN5,COL5A1,COL6A3,CX3CL1,CXCL14,DLEC1,EGFR,ERRFI1,ESR1,FN1,FPR2,GRIN2A,HAUS3,IFIH1,IGSF10,KIDINS220,LAMA5,LOXL1,LTBP1,LZTR1,MAPK3,MARF1,MAU2,MDH1,MGAM,MGST1,MPRIP,MYT1L,NCKAP5L,NCKIPSD,NEB,NEGR1,NOTCH1,NR1H2,NR4A2,OBSCN,OLFM1,OPRD1,OPRK1,OPRM1,PCDHAC1,PCDHGA2,PCDHGA9,PDE4A,PHF2,PI4KA,PIWIL1,POSTN,RAB11FIP3,RRM1,SELE,SERINC2,SLC6A2,SLC6A4,S…	80
Physiological System Development and Function	Organismal Functions	movement	Movement of rodents	3.43e-06	0.000135	ANK3,DIABLO,DRD2,EPB41,ERRFI1,GPR37,GRIN2A,GTF2IRD1,HEXB,KCNC3,NAT8L,NR4A2,NSD1,OPRM1,PARK7,PEX2,PROKR2,RIMS1,RTN4R,SELE,SHANK2,SLC6A4,SLITRK1,SNORC,SPAG17,VPS13A	26
Diseases and Disorders	Cardiovascular Disease,Organismal Injury and Abnormalities	arrhythmia	Arrhythmia	3.54e-06	0.000138	AKAP9,CACNA1D,CACNA1S,CACNA2D3,CEP85L,COL5A1,CTNNA3,DPP6,ESR1,FHL2,GABRA2,GABRB3,HCN1,HCN4,KCNH7,KCNJ11,KCNMB3,MPO,OPRM1,PI4KA,RIMS1,SCN5A,SERINC2,SLC6A2,SLC6A4,SOS1,TANGO2,TJP1,TRIO,TSHR,TTN,TUBA1A,TUBA1C	33
Diseases and Disorders	Organismal Injury and Abnormalities,Reproductive System Disease	dysmenorrhea	Dysmenorrhea	3.7e-06	0.000145	DRD2,ESR1,MUC16,OPRM1,PDE4A,SLC6A2,SLC6A4	7
Diseases and Disorders	Inflammatory Disease,Inflammatory Response,Organismal Injury and Abnormalities,Respiratory Disease	inflammation	Inflammation of airway	3.8e-06	0.000148	ABCC1,ACO2,CD276,CDKN1A,CHRNA7,CTNNA3,DNAH1,DNAH5,DRD2,ENO1,FLG,FN1,FPR2,GABRB3,GRIN2A,HRH2,IL17RB,MAPK3,MPO,OPRD1,OPRK1,OPRM1,PDCD1,PDE4A,POSTN,PREX1,PRMT1,SCN5A,SELE,SEMA3E,SERINC2,SLC6A2,SLC6A4,SRSF3,ST3GAL3,TNIP2,TRIO,TUBA1A,TUBA1C,WNT1,WNT5A	41
Diseases and Disorders	Cancer,Organismal Injury and Abnormalities	adult solid tumor	Adult solid tumor	3.87e-06	0.00015	DPP4,DRD2,EP300,FHIT,GRIN2A,IMMP2L,NOTCH1,OPRD1,OPRK1,OPRM1,PDCD1,PDE4A,PIM1,POLD1,RRM1,SLC6A2,SLC6A4,TRAF3,TUBA1A,TUBA1C,WWOX,YTHDF2	22
Diseases and Disorders	Neurological Disease,Organismal Injury and Abnormalities,Psychological Disorders	mania	Mania	3.87e-06	0.00015	CACNA1D,CACNA1S,DRD2,GABRA2,GABRB3,GABRG1,HRH2,OPRD1,OPRK1,OPRM1,SCN5A,SLC6A4	12
Diseases and Disorders	Organismal Injury and Abnormalities,Psychological Disorders	hallucinations	Hallucinations	4.18e-06	0.000162	COMT,GABRA2,GABRB3,GABRG1,NPAS3,OPRD1,OPRK1,OPRM1	8
Diseases and Disorders	Neurological Disease,Organismal Injury and Abnormalities	epilepsy	Epilepsy	4.43e-06	0.000171	ABCC1,ADM,ALDH7A1,AP3B2,CACNA1I,CACNA2D3,CDKN1A,CHGB,CHRNA7,CLCN2,CNTNAP2,DUSP6,EP300,ERRFI1,GABRA2,GABRB3,GABRG1,GRIN2A,GUF1,HCN1,HCN4,KCNC3,KCNH5,KCNJ11,KCNK1,LINGO1,MDH1,ME2,NPRL2,NR4A2,NRXN1,NSF,OPRD1,OPRK1,OPRM1,POLG,RBFOX1,RELN,SCN5A,SERPINE2,SLC6A2,SLC6A4,SPRY2,ST3GAL3,TEF,TNRC6A,WWOX	47
Diseases and Disorders	Cardiovascular Disease,Hereditary Disorder,Organismal Injury and Abnormalities	familial cardiovascular disease	Familial cardiovascular disease	4.58e-06	0.000176	ABCC6,ABCG8,AKAP9,ALPK3,CACNA1D,CACNA1S,CACNA2D3,CEP85L,COL5A1,COMT,CPS1,CRKL,CTNNA3,DGCR8,DLC1,DNAH1,DNAH11,DNAH5,DPP4,DPP6,DRD2,EGFR,FBN2,FHL2,FOXP1,HCN4,IFIH1,KALRN,KMT2D,LTBP1,MACROD1,MRPL3,NOTCH1,OBSCN,POLE,RERE,RRM1,SCN5A,SLC25A1,SLC6A2,SLC6A4,SORT1,SOS1,STING1,TANGO2,TBX1,TEAD2,TEK,TJP1,TTN,TXNRD2,WDPCP	52
Diseases and Disorders	Developmental Disorder,Neurological Disease,Organismal Injury and Abnormalities	syndromic neurodevelopmental disorder	Syndromic neurodevelopmental disorder	4.68e-06	0.00018	ADM,AP3B2,ATN1,CNTNAP2,DCC,DGCR8,DRD2,DYNC2H1,EP300,ESR1,GABRA2,GABRB3,GUF1,HCN1,HRH2,KCNH5,KMT2C,KMT2D,LZTR1,MED15,NRXN1,OAS3,PCDHAC1,PHOX2B,RERE,SEMA3E,SLC6A2,SLC6A4,SOS1,ST3GAL3,TBX1,TCF20,WDR62,WWOX	34
Diseases and Disorders	Cancer,Hematological Disease,Immunological Disease,Organismal Injury and Abnormalities	B cell cancer	B cell cancer	4.78e-06	0.000183	ABCA7,ABCC1,ADCY2,ADSL,AGBL4,ANK3,ARHGEF33,ARVCF,ASTN2,ATN1,BAZ2B,BBX,BCL11A,BCL7A,BIRC6,CACNA1I,CASP8,CCDC66,CD160,CD47,CDH7,CDKN1A,CLCA4,CNTN6,CNTNAP2,CNTNAP4,CNTNAP5,COL4A2,COL6A3,COMT,CPNE5,CSGALNACT2,CSMD1,DAP,DCC,DGCR2,DHX57,DIABLO,DLC1,DNAH5,DNAH7,DOP1B,EDC4,EGFR,EMB,EP300,EPSTI1,ERC2,ETS1,FAM153A/FAM153B,FBN2,FBN3,FHIT,FLG,FLT3,FN1,FOXP1,FSCB,GEM,GPRIN1,GRIN2A,GTF2IRD1,HSP90AA1,IGF2BP1,IM…	150
Molecular and Cellular Functions | Physiological System Development and Function	Cell Morphology,Cellular Function and Maintenance,Nervous System Development and Function,Tissue Morphology	length	Length of neurons	4.79e-06	0.000183	CRHR1,DBN1,DRD2,ESR1,FARP2,KALRN,LINGO1,MAPT,NEO1,RCAN1,RICTOR,RTN4R,SLC39A12,TENM4,TIMP2,TRIO,TRIP6,WNT5A	18
Diseases and Disorders	Organismal Injury and Abnormalities,Reproductive System Disease	benign uterine disease	Benign uterine disease	4.85e-06	0.000185	ABI2,AGRN,ARVCF,ASPN,BIRC6,CAPN6,CDC45,CDH23,CLDN5,COL5A1,COL6A3,CXCL14,DLEC1,EGFR,ERRFI1,ESR1,GRIN2A,HAUS3,IFIH1,IGSF10,KIDINS220,LAMA5,LOXL1,LTBP1,LZTR1,MAPK3,MARF1,MAU2,MDH1,MGAM,MGST1,MPRIP,MYT1L,NCKAP5L,NCKIPSD,NEB,NEGR1,NR1H2,NR4A2,OBSCN,OLFM1,PCDHAC1,PCDHGA2,PCDHGA9,PDE4A,PHF2,PI4KA,PIWIL1,POSTN,RAB11FIP3,STING1,TCF20,TEK,TTN,UBE2J1,WBP2NL,ZDHHC17	57
Diseases and Disorders	Hereditary Disorder,Organismal Injury and Abnormalities,Skeletal and Muscular Disorders	hereditary myopathy	Hereditary myopathy	5.05e-06	0.000192	ABHD16A,AGRN,AKAP9,ALDH18A1,ALPK3,ASPN,BEND4,CACNA1S,CEP85L,CHMP1A,COL4A2,COL5A1,COL6A3,COL6A6,COL8A1,COMT,CPT1C,CTNNA3,CXCL14,DPP6,DSTYK,DYSF,ESR1,FHL2,FN1,GFM2,GLE1,GRIN2A,HCN4,KARS1,KIDINS220,KLB,LOXL1,LRPPRC,MACROD1,MAPT,MECR,MGST1,MPV17,MRPL3,MTRFR,NARS2,NDUFA13,NDUFA4,NEB,NIPA1,NSD1,NUBPL,OBSCN,OPA1,PFKM,POLG,PREPL,RRM1,SCN5A,SDC3,SLC25A1,SLC6A4,SOS1,TANGO2,TJP1,TLN2,TOR1A,TTN,TUBA1A,TXNRD2…	68
Diseases and Disorders	Nutritional Disease,Organismal Injury and Abnormalities	obesity	Obesity	5.09e-06	0.000193	ABCF2,AEBP1,CACNA1D,CACNA1I,CACNA1S,CACNA2D3,CBR3,CDKN1A,CERS5,CHRNA7,CHRNB4,CKB,CPT1C,CRHR1,CX3CL1,DPP4,DRD2,EGFR,ENO1,ESR1,GABRA2,GABRB3,GABRG1,GCG,GP1BB,HDC,KCNJ11,KIDINS220,KLB,MAPK3,MARK3,MCHR1,MDH1,MGAM,MPO,MRTFA,MYT1L,NGEF,NISCH,NR4A2,NRXN1,OPRD1,OPRK1,OPRM1,PAM,PDE4A,PIAS3,PPP1R3A,SCN5A,SDC3,SERINC2,SLC6A2,SLC6A4,SORT1,TERF2IP,THBS1,TIMP2,TMBIM6,TRIO,VGF,WNT10B	61
Diseases and Disorders	Neurological Disease,Organismal Injury and Abnormalities	childhood encephalopathy	Childhood encephalopathy	5.43e-06	0.000205	ALDH7A1,AP3B2,CLCN2,CNTNAP2,EP300,GABRA2,GABRB3,GRIN2A,GUF1,HCN1,HSP90AA1,KARS1,KCNH5,MECR,POLG,RBFOX1,RELN,SLC6A2,SLC6A4,ST3GAL3,TUBA1A,TUBA1C,WWOX	23
Diseases and Disorders	Hereditary Disorder,Neurological Disease,Organismal Injury and Abnormalities	familial epilepsy	Familial epilepsy	5.9e-06	0.000223	ALDH7A1,AP3B2,CHRNA7,CLCN2,CNTNAP2,EP300,GABRA2,GABRB3,GRIN2A,GUF1,HCN1,HCN4,KCNH5,KCNJ11,ME2,NPRL2,NRXN1,NSF,POLG,RBFOX1,RELN,SLC6A2,SLC6A4,ST3GAL3,TNRC6A,WWOX	26
Diseases and Disorders	Cancer,Organismal Injury and Abnormalities,Respiratory Disease	squamous cell lung cancer	Lung squamous cell carcinoma	5.92e-06	0.000223	ATN1,BCL11A,BST1,CACNA1S,CALN1,CASP8,CDH7,CDKN1A,CNTNAP2,CNTNAP4,CNTNAP5,CPEB1,CPS1,CSMD1,CSMD3,DCC,DLX6,DNAH10,DNAH5,DYSF,EGFR,EP300,FBN2,FLG,FLT3,FN1,FOXP1,GABRB3,HCN1,HSP90AA1,IQCK,KCNH5,KMT2C,KMT2D,MCHR1,MDH1,MEI1,MUC6,MYT1L,NAALAD2,NEB,NFE2L3,NOTCH1,NOTCH2NLA/NOTCH2NLB,NR1H2,NR4A2,NRXN1,NSD1,NSD3,NSF,OPA1,OR52A5,PABPC5,PCDH11X,PCDHGA2,PDCD1,PHF2,PHF3,PIKFYVE,PLCH1,POLD1,PRB1/PRB2,RELN,RIMBP2…	78
Physiological System Development and Function	Behavior	social exploration	Social exploration	6.23e-06	0.000234	CADPS2,MCHR1,NAT8L,NLGN3,NPAS3,NRCAM,OPRM1,PREX1,SHANK2,SLC6A4,TBR1,VPS13A	12
Diseases and Disorders	Hereditary Disorder,Neurological Disease,Organismal Injury and Abnormalities	familial seizure disorder	Familial seizure disorder	6.3e-06	0.000236	ABCA2,ALDH7A1,AP3B2,CACNA1D,CHRNA7,CLCN2,CNTNAP2,DHDDS,EP300,GABRA2,GABRB3,GRIN2A,GUF1,HCN1,HCN4,KCNH5,KCNJ11,ME2,NPRL2,NRXN1,NSF,POLG,RBFOX1,RELN,SLC6A2,SLC6A4,ST3GAL3,TNRC6A,WWOX	29
Diseases and Disorders	Cardiovascular Disease,Organismal Injury and Abnormalities	disorder of blood pressure	Disorder of blood pressure	6.5e-06	0.000243	ABCF2,ADM,AFF3,ARL8B,ASPN,CACNA1D,CACNA1S,CACNA2D3,CASP8,CCDC85A,CHRNA7,CHRNB4,CKB,CNTNAP2,CNTNAP5,COL8A1,COMT,CPS1,CRHR1,CX3CL1,CXXC4,DIO2,DRD2,EGFR,ESR1,FFAR3,FMO2,FOXP1,GABRA2,GABRB3,GABRG1,GRIN2A,IGSF10,IMMP2L,KCNJ11,KIF26B,LMO3,LRRC14,MESD,MGAM,MPO,MRTFA,MYO10,NAALAD2,NEGR1,NIPA1,NISCH,NOTCH1,NR1H2,NSD3,NUCB2,OPRM1,PCDH12,PDE4A,PIM1,POLD1,RBFOX1,ROBO3,RUNX1T1,SCN5A,SELE,SLC24A2,SLC43A1,SLC6A…	75
Diseases and Disorders	Gastrointestinal Disease,Organismal Injury and Abnormalities	irritable bowel syndrome	Irritable bowel syndrome	6.52e-06	0.000244	CLCN2,GABRA2,GABRB3,GABRG1,HRH2,OPRD1,OPRK1,OPRM1,SERINC2,SLC6A2,SLC6A4	11
Diseases and Disorders	Cancer,Endocrine System Disorders,Organismal Injury and Abnormalities	carcinoid tumor	Carcinoid tumor	6.86e-06	0.000255	ADCY2,AFF3,BEND4,CACNA1S,CD276,CELSR3,CHDH,CLCA4,COL6A6,DLC1,DNAH11,DNAH5,DRD2,DYSF,EP300,ERCC5,FLT3,FMO2,HS2ST1,KMT2C,LAMA5,LY75,LY75-CD302,NCKAP5L,NEB,NOTCH1,NRCAM,OBSCN,PCDH7,PDLIM7,PITPNM2,PLEKHH2,POSTN,PSMD14,RUNX1T1,SCARF2,SELE,SLC4A10,TEK,TENM2,TNIK,TSHR,TTN,UNC13C	44
Diseases and Disorders	Cancer,Gastrointestinal Disease,Organismal Injury and Abnormalities	rectal adenocarcinoma	Rectal adenocarcinoma	6.97e-06	0.000259	BMS1,BST1,CCDC66,CDH23,CDX2,CNTNAP4,CSMD1,DCC,DIO2,DLEC1,DLX6,DNAH10,DNAH5,DPP6,DYNC2H1,EGFR,EIF2B2,ERC2,ESR1,ETS1,GOLGA6L9 (includes others),GPR149,GPRIN1,GRIN2A,HIRA,ICE1,IGSF3,INO80D,KANSL1,KDM5B,KIF24,LAMA5,LINGO1,MARF1,MAU2,MEX3B,MPO,MPRIP,MUC16,MUC6,NFE2L3,OBSCN,OPRK1,PCDHGA2,PDE9A,PHF14,PHF2,PIKFYVE,POLD1,POLE,POLR3H,PPP1R3A,PRB1/PRB2,RBFOX1,SCN5A,SLC23A2,SOS1,TEK,TENM2,TMEM67,TROAP,TSPYL5…	66
Physiological System Development and Function	Behavior	social behavior	Social behavior	7.03e-06	0.000261	CADPS2,CNTNAP2,GABRB3,GNB1L,HCN1,KALRN,MAPT,NLGN3,NLGN4X,NRXN1,PCM1,RIMS1,SEPTIN5,SHANK2,SLC6A4,TBX1,TCF20,VPS13A	18
Diseases and Disorders	Cancer,Gastrointestinal Disease,Organismal Injury and Abnormalities	rectum tumor	Rectum tumor	7.06e-06	0.000261	BMS1,BST1,CCDC66,CDH23,CDX2,CNTNAP4,CSMD1,DCC,DIO2,DLEC1,DLX6,DNAH10,DNAH5,DPP6,DYNC2H1,EGFR,EIF2B2,ERC2,ESR1,ETS1,GOLGA6L9 (includes others),GPR149,GPRIN1,GRIN2A,HIRA,ICE1,IGSF3,INO80D,KANSL1,KDM5B,KIF24,LAMA5,LINGO1,MARF1,MAU2,MCRS1,MEX3B,MPO,MPRIP,MUC16,MUC6,NFE2L3,OBSCN,OPRK1,PCDHGA2,PDCD1,PDE9A,PHF14,PHF2,PIKFYVE,POLD1,POLE,POLR3H,PPP1R3A,PRB1/PRB2,RBFOX1,SCN5A,SLC23A2,SOS1,TEK,TENM2,TMEM67,…	68
Diseases and Disorders	Organismal Injury and Abnormalities,Psychological Disorders	psychosis	Psychosis	7.19e-06	0.000265	CHRNA7,COMT,DRD2,ESR1,GABRA2,GABRB3,GABRG1,GRIN2A,HRH2,NPAS3,NR4A2,OPRD1,OPRK1,OPRM1,SLC6A2,SLC6A4	16
Physiological System Development and Function	Behavior	exploratory behavior	Exploratory behavior	7.19e-06	0.000265	ANK3,CADPS2,CKB,DRD2,ERC2,GABRB3,HDC,KCNC3,KCNJ11,MAPT,NPAS3,RIMS1,RTN4R,SHANK2,SLC6A4,ZDHHC8	16
Diseases and Disorders	Organismal Injury and Abnormalities	chronic lower back pain	Chronic lower back pain	7.25e-06	0.000266	DRD2,GRIN2A,HRH2,OPRD1,OPRK1,OPRM1,SCN5A,SLC6A2,SLC6A4	9
Diseases and Disorders	Connective Tissue Disorders,Organismal Injury and Abnormalities,Skeletal and Muscular Disorders	non-traumatic arthropathy	Non-traumatic arthropathy	7.78e-06	0.000285	ABCC1,ADAMTS6,ADM,APOM,ASPN,ASTN2,CACNA1D,CACNA1S,CACNA2D3,CD276,CHADL,CNTNAP4,COL4A2,CTNNA3,CX3CL1,CXCL14,DPP4,DRD2,EEF2,ENO1,ERRFI1,ETS1,FIP1L1,FLT3,FN1,FPR2,GABRA2,GABRB3,GABRG1,GCA,GRIN2A,HRH2,KCNH7,KCTD20,LIMCH1,LMO4,LTBP1,LY6G6D,MAPK3,MPO,MRC1,MTRFR,NR4A2,OPRD1,OPRK1,OPRM1,P3H2,PCM1,PDCD1,PDE4A,PDGFRL,PIAS3,POLD1,POSTN,PPP2R2B,PTPRN2,RIMS1,RNF169,SBNO1,SCN5A,SDC3,SEL1L,SELE,SERINC2,SLC6A2,S…	81
Molecular and Cellular Functions	Cell Morphology	shape change	Shape change of neurites	7.79e-06	0.000285	ACTR3,AGRN,CDKN1A,CHRNA7,CNTNAP2,CPT1C,CRHR1,DBN1,DCC,DRD2,EFNA5,EPHB2,GABRB3,IGF2BP1,KALRN,KIDINS220,MAPK3,MAPT,MYO10,NEO1,NLGN3,NOTCH1,NRCAM,OPA1,OPRM1,PKP4,RELN,RIMS1,SEMA3E,SHANK2,SULT4A1,TBR1,TRIO,UCHL1,VAMP7,VGF,WNT5A,ZDHHC8	38
Diseases and Disorders	Organismal Injury and Abnormalities	postoperative pain	Postoperative pain	8.54e-06	0.000311	CACNA2D3,CHRNA7,CHRNB4,DRD2,GABRA2,GABRB3,GABRG1,GRIN2A,HRH2,OPRD1,OPRK1,OPRM1,SCN5A,SLC6A2,SLC6A4	15
Diseases and Disorders	Infectious Diseases,Organismal Injury and Abnormalities	infection	Infection by HIV-1	8.59e-06	0.000313	ACTR3,BCL11A,CACNA2D3,CAMK1D,CAPN6,CCDC134,CHADL,CHRNA7,COL5A1,DCAF1,DPP4,DYSF,EGFR,EP300,ERCC5,GABARAPL2,GABPB1,GABRB3,GABRG1,GTF2A1,GTF2H1,KARS1,KCNJ11,LAPTM5,LMAN2,LRPPRC,MANBA,MED15,MRC1,NDUFA6,NLGN3,NUP85,OTUD1,PCDH11X,PFKM,PHF2,PHF3,PI4KA,PKN2,PMM1,POLG,POLR2I,PTPRN2,PTPRU,RANBP1,SLC6A2,SLC6A4,SOWAHA,ST3GAL3,STARD3NL,TCF20,TUBA1A,TUBA1C,WNT1,ZC3H7B,ZNF536	56
Diseases and Disorders	Organismal Injury and Abnormalities,Respiratory Disease	sinus disorder	Sinus disorder	8.89e-06	0.000323	DNAH1,DNAH5,EGFR,GABRB3,GRIN2A,HSP90AA1,OPRD1,OPRK1,OPRM1,PDCD1,RRM1,SCN5A,SLC6A2,SLC6A4,TUBA1A,TUBA1C	16
Diseases and Disorders	Cardiovascular Disease,Organismal Injury and Abnormalities	disorder of coronary artery	Disorder of coronary artery	8.97e-06	0.000325	ACAA1,ADM,ASTN2,CACNA1D,CACNA1S,CACNA2D3,CCDC92,CD47,CNTN6,CNTNAP5,CSMD1,CTNNA3,DPP4,ESR1,FN1,GABRA2,GABRB3,GABRG1,HRH2,KALRN,KCNJ11,LTBP1,MGAM,OPRD1,OPRK1,OPRM1,PDE4A,RBFOX1,SCN5A,SELE,SLC6A4,THBS1,TUBA1A,TUBA1C,WWOX	35
Molecular and Cellular Functions	Cell-To-Cell Signaling and Interaction	abnormal quantity	Abnormal quantity of neurotransmitter	9.06e-06	0.000328	DRD2,ERC2,FFAR3,GTF2IRD1,NR4A2,PNKD,SLC23A2,SLITRK1,VPS13A	9
Diseases and Disorders	Organismal Injury and Abnormalities,Psychological Disorders	major affective disorder	Major affective disorder	9.35e-06	0.000336	ADCY2,AHCY,ANK3,CACNA1I,CAPN6,CD47,CHRNA7,CHRNB4,COMT,DIABLO,DRD2,EGFR,ESR1,FAM153A/FAM153B,GABRA2,GABRB3,GABRG1,GRIN2A,HRH2,MAPT,MRPL3,OPRD1,OPRK1,OPRM1,PDE9A,POU3F2,PSKH1,PTPRU,RCAN1,RELN,RIMS1,SCN5A,SHANK2,SLC6A2,SLC6A4,SPRY2,STARD9,TBR1,TENM4,VGF	40
Diseases and Disorders	Developmental Disorder,Neurological Disease,Organismal Injury and Abnormalities	congenital neurological disorder	Congenital neurological disorder	9.35e-06	0.000336	ABCA7,ADM,AGRN,ALDH18A1,ATN1,BCL11A,CACNA1D,CACNA1S,CDH23,CEP85L,CHMP1A,CNTNAP2,COL4A2,DCC,DGCR8,DLC1,DRD2,DUSP6,DYNC2H1,EFNA5,EGFR,EP300,ERCC5,ESR1,FGF17,FOXP1,GFM2,GLE1,HEXB,KARS1,KMT2C,KMT2D,LAMA5,LMO4,LRPPRC,LZTR1,MAP3K4,MAPT,MED15,MPO,MPV17,MYO10,NKX2-2,NOTCH1,NRXN1,OAS3,OPA1,PCDH12,PCDHAC1,PHOX2B,PI4KA,PIGW,POLD1,POLG,POU4F2,PPIL1,PREPL,PROKR2,RAB18,RELN,RERE,SCN5A,SEMA3E,SLC25A1,SLC6A2,SLC…	81
Molecular and Cellular Functions | Physiological System Development and Function	Cell Morphology,Cellular Assembly and Organization,Cellular Development,Cellular Function and Maintenance,Cellular Growth and Proliferation,Nervous System Development and Function,Organismal Development,Tissue Development	branching	Branching of neurons	9.37e-06	0.000336	ACTR3,AGRN,CDKN1A,CHRNA7,CNTNAP2,CPT1C,CRHR1,DBN1,DCC,DRD2,EFNA5,EPHB2,ERC2,GABRB3,IGF2BP1,KALRN,KIDINS220,MAPK3,MAPT,MYO10,NEO1,NLGN3,NOTCH1,NRCAM,OPA1,OPRM1,PKP4,RELN,RIMS1,SEMA3E,SHANK2,SULT4A1,TRIO,UCHL1,VAMP7,VGF,WNT5A,ZDHHC8	38
Physiological System Development and Function	Organismal Development	abnormal morphology	Abnormal morphology of body cavity	9.57e-06	0.000343	ABCA7,ABCC1,ADM,AEBP1,AKAP9,ANK3,BCL11A,BHLHE40,CACNA1D,CACNA1S,CACNA2D3,CADPS2,CASP8,CCDC134,CD47,CDKN1A,CELSR3,CEP85L,CHRNB4,COL9A2,COMT,CPEB1,CRHR1,CRKL,CTNNA3,DGCR8,DNAH11,DPP6,DRD2,EGFR,EP300,EPHB2,ERCC5,ERRFI1,ESR1,ETS1,FHIT,FHL2,FLT3,FN1,FPR2,GAK,GFUS,HCN4,HDC,HEXB,HIRA,HOXB4,HRH2,HS2ST1,ITGB6,JUND,KCNJ11,KIDINS220,KIRREL1,KLB,LOXL1,LTBP1,MANBA,MAPK3,MEX3B,MPIG6B,MPL,MRTFA,NKX2-2,NOTCH1,NP…	126
Molecular and Cellular Functions | Physiological System Development and Function	Cell Morphology,Cellular Function and Maintenance,Nervous System Development and Function,Tissue Morphology	length	Length of neurites	9.86e-06	0.000352	CRHR1,DRD2,ESR1,FARP2,KALRN,LINGO1,NEO1,RCAN1,RICTOR,RTN4R,SLC39A12,TENM4,TIMP2,TRIO,TRIP6,WNT5A	16
Diseases and Disorders	Cancer,Gastrointestinal Disease,Organismal Injury and Abnormalities	rectum cancer	Rectum cancer	9.91e-06	0.000354	BMS1,BST1,CCDC66,CDH23,CDX2,CNTNAP4,CSMD1,DCC,DIO2,DLEC1,DLX6,DNAH10,DNAH5,DPP6,DYNC2H1,EGFR,EIF2B2,ERC2,ESR1,ETS1,GOLGA6L9 (includes others),GPR149,GPRIN1,GRIN2A,HIRA,ICE1,IGSF3,INO80D,KANSL1,KDM5B,KIF24,LAMA5,LINGO1,MARF1,MAU2,MEX3B,MPO,MPRIP,MUC16,MUC6,NFE2L3,OBSCN,OPRK1,PCDHGA2,PDCD1,PDE9A,PHF14,PHF2,PIKFYVE,POLD1,POLE,POLR3H,PPP1R3A,PRB1/PRB2,RBFOX1,SCN5A,SLC23A2,SOS1,TEK,TENM2,TMEM67,TROAP,…	67
Molecular and Cellular Functions	Cellular Movement	migration	Migration of brain cells	1.07e-05	0.00038	CADPS2,CELSR3,CX3CL1,DGCR8,FN1,LMO4,POU3F2,PREX1,RELN,RERE,ROBO3,SDC3,TBR1,TRIO,TUBA1A	15
Diseases and Disorders	Neurological Disease,Organismal Injury and Abnormalities,Psychological Disorders	bipolar I disorder	Bipolar I disorder	1.07e-05	0.000382	DRD2,GABRA2,GABRB3,GABRG1,GRIN2A,HRH2,OPRD1,OPRK1,OPRM1,SCN5A,SLC6A4	11
Diseases and Disorders	Cancer,Organismal Injury and Abnormalities	mucosal melanoma	Mucosal melanoma	1.14e-05	0.000404	ABI2,ARHGAP26,BCL11A,C12orf54,CNTNAP5,COL6A3,CPS1,CSMD1,DCAF1,DNAH10,DNAH3,DNAH5,DNAH7,DYNC2H1,EGFR,FARP2,FLG,FLT3,GAL3ST2,GRIN2A,HSP90AA1,ICE1,KMT2C,KMT2D,MESD,MGAM,MUC16,NCKAP5,NEB,NRCAM,PCDH11X,PDCD1,POLE,PRMT1,PTBP2,SCN5A,SLC6A2,SOWAHA,TBC1D5,TENM2,TENM4,TLK1,TTN,TUBA1A,TUBA1C,WDSUB1	46
Molecular and Cellular Functions | Physiological System Development and Function	Cell Morphology,Cellular Assembly and Organization,Cellular Development,Cellular Function and Maintenance,Cellular Growth and Proliferation,Embryonic Development,Nervous System Development and Function,Organismal Development,Tissue Development	branching	Branching of neurites	1.17e-05	0.000415	ACTR3,AGRN,CDKN1A,CHRNA7,CNTNAP2,CPT1C,CRHR1,DBN1,DCC,DRD2,EFNA5,EPHB2,GABRB3,IGF2BP1,KALRN,KIDINS220,MAPK3,MAPT,MYO10,NEO1,NLGN3,NOTCH1,NRCAM,OPA1,OPRM1,PKP4,RELN,RIMS1,SEMA3E,SHANK2,SULT4A1,TRIO,UCHL1,VAMP7,VGF,WNT5A,ZDHHC8	37
Diseases and Disorders	Ophthalmic Disease,Organismal Injury and Abnormalities	ocular motility disorder	Ocular motility disorder	1.21e-05	0.000427	DCC,GABRA2,GABRB3,GABRG1,KIDINS220,MAPT,NR4A2,PHOX2B,POLG,POU4F2,PTBP2,ROBO3,SCN5A,TMEM67,TUBA1A,TUBA1C	16
Diseases and Disorders	Organismal Injury and Abnormalities,Psychological Disorders	addiction	Addiction	1.22e-05	0.000428	CACNA1I,CACNA2D3,CHRNA7,CHRNB4,COMT,DRD2,ESR1,GABRA2,GABRB3,GABRG1,GRIN2A,NRXN1,OPRD1,OPRK1,OPRM1,PDE4A,SCN5A,SLC6A2,SLC6A4	19
Diseases and Disorders	Organismal Injury and Abnormalities,Skeletal and Muscular Disorders	hallux valgus	Hallux valgus	1.24e-05	0.000435	DRD2,OPRD1,OPRK1,OPRM1,SLC6A2	5
Physiological System Development and Function	Behavior	nest building behavior	Nest building behavior	1.25e-05	0.000437	CKB,CNTNAP2,GABRB3,KALRN,MAPT,NPAS3,NRXN1,SHANK2	8
Diseases and Disorders	Hereditary Disorder,Neurological Disease,Organismal Injury and Abnormalities,Psychological Disorders	schizophreniform psychosis	Schizophreniform psychosis	1.26e-05	0.000441	CHRNA7,DRD2,ESR1,GABRA2,GABRB3,GABRG1,NPAS3,OPRD1,OPRK1,OPRM1,SLC6A4	11
Diseases and Disorders	Cancer,Organismal Injury and Abnormalities,Reproductive System Disease	invasive breast adenocarcinoma	Invasive breast adenocarcinoma	1.32e-05	0.000461	ARF3,ATP5IF1,CACNA1S,CD276,CDKN1A,CELSR3,CLCA2,CXCL14,DPP6,EGFR,ESR1,FN1,HSP90AA1,ICE1,KMT2C,LIMCH1,MINAR1,MUC16,NFE2L3,NOTCH2NLA/NOTCH2NLB,OBSCN,OSBPL2,PCDH7,PDCD1,POSTN,PREX1,PRSS3,RERE,RRM1,SENP6,SPAG17,TERF2IP,TRIO,TUBA1A,TUBA1C	35
Diseases and Disorders	Cancer,Endocrine System Disorders,Gastrointestinal Disease,Organismal Injury and Abnormalities	digestive system neuroendocrine tumor	Digestive system neuroendocrine tumor	1.33e-05	0.000463	ADCY2,AFF3,BEND4,CACNA1S,CD276,CELSR3,CHDH,CLCA4,COL6A6,DLC1,DNAH11,DNAH5,DRD2,DYSF,EP300,ERCC5,FLT3,FMO2,HRH2,HS2ST1,HSP90AA1,KMT2C,LAMA5,LY75,LY75-CD302,NCKAP5L,NEB,NOTCH1,NRCAM,OBSCN,PCDH7,PDLIM7,PITPNM2,PLEKHH2,POSTN,PSMD14,RUNX1T1,SCARF2,SELE,SLC4A10,TEK,TENM2,THBS1,TNIK,TSHR,TTN,UNC13C	47
Diseases and Disorders | Physiological System Development and Function	Organismal Development,Organismal Injury and Abnormalities	abnormal morphology	Abnormal morphology of head	1.38e-05	0.000481	ABCC6,ABI2,ANK3,ATN1,CADPS2,CCDC134,CDC45,CDH23,CDHR1,CDKN1A,CELSR3,CHRNA7,CHRNB4,CHST6,CKB,CLCN2,CNTN6,CNTNAP2,COL8A1,CRKL,CX3CL1,DBN1,DCC,DRD2,EFNA5,EGFR,EP300,EPHB2,ERC2,ESR1,FGF17,GABRB3,GPR37,GTF2IRD1,HDC,HEXB,HIRA,KALRN,KIDINS220,LMO4,LOXL1,MANBA,MAPT,MYO10,NIPBL,NOTCH1,NPAS3,NR1H2,NR4A2,NRCAM,OPRD1,OPRK1,OPRM1,PARK7,PEX11B,PEX2,POLE,POSTN,POU3F2,POU4F2,POU4F3,PROKR2,RIMS1,RP1L1,RTN4R,SELEN…	86
Diseases and Disorders	Connective Tissue Disorders,Inflammatory Disease,Inflammatory Response,Organismal Injury and Abnormalities,Skeletal and Muscular Disorders	hip or knee osteoarthritis	Hip or knee osteoarthritis	1.42e-05	0.000493	ASPN,ASTN2,CHADL,LTBP1,MTRFR,OPRD1,OPRK1,OPRM1,P3H2,POSTN,SBNO1,SCN5A,SLC6A2,SLC6A4,TLN2,TUBA1A,TUBA1C	17
Diseases and Disorders	Neurological Disease,Organismal Injury and Abnormalities	pediatric-onset neurological disease	Pediatric-onset neurological disease	1.44e-05	0.000498	ALDH7A1,AP3B2,CLCN2,CNTNAP2,EP300,GABRA2,GABRB3,GRIN2A,GUF1,HCN1,HEXB,HSP90AA1,KARS1,KCNH5,MECR,PDCD1,POLG,RBFOX1,RELN,SLC6A2,SLC6A4,ST3GAL3,TUBA1A,TUBA1C,WWOX	25
Physiological System Development and Function	Behavior	locomotion	Locomotion	1.46e-05	0.000503	ABCA2,ANK3,CDH23,CHRNB4,CNTNAP2,CRHR1,DRD2,ESR1,GABRB3,GPR37,GRIN2A,HEXB,HOMER2,KALRN,KCNC3,KCNJ11,MAPK3,MAPT,NEGR1,NPAS3,NR4A2,NRCAM,OPRD1,OPRK1,OPRM1,PARK7,RCAN1,RELN,RICTOR,RIMS1,SDC3,SHANK2,SLC6A2,SORCS3,TSHR,UCHL1,VGF,VPS13A,ZDHHC8	39
Diseases and Disorders	Neurological Disease,Organismal Injury and Abnormalities,Psychological Disorders	obsessive-compulsive spectrum disorder	Obsessive-compulsive spectrum disorder	1.57e-05	0.000541	CACNA2D3,COMT,DRD2,ESR1,GABRA2,GABRB3,GABRG1,GRIN2A,OPRD1,OPRK1,OPRM1,SLC6A2,SLC6A4,SLITRK1	14
Diseases and Disorders	Cancer,Organismal Injury and Abnormalities	invasive adenocarcinoma	Invasive adenocarcinoma	1.6e-05	0.000551	ARF3,ATP5IF1,CACNA1S,CD276,CDKN1A,CELSR3,CLCA2,CXCL14,DCC,DPP6,EGFR,ESR1,FLT3,FN1,HSP90AA1,ICE1,KMT2C,LIMCH1,MINAR1,MUC16,NFE2L3,NOTCH2NLA/NOTCH2NLB,OBSCN,OSBPL2,PCDH7,PDCD1,POSTN,PREX1,PRSS3,RERE,RRM1,SENP6,SPAG17,TERF2IP,TRIO,TUBA1A,TUBA1C,WNT1	38
Diseases and Disorders	Cancer,Organismal Injury and Abnormalities	embryonal tumor	Embryonal tumor	1.61e-05	0.000553	ABCC1,ASTN2,CASP8,CD276,CDKN1A,CLCA4,CNTNAP2,COL4A2,CSMD3,DGCR5,DLC1,EFNA5,EGFR,EP300,FBN2,FBXL17,FLT3,FN1,GABRA2,GABRG1,GPR37,HSP90AA1,KMT2C,KMT2D,LINGO1,LMO3,MRTFA,MUC16,MUC6,NCKAP5,NFE2L3,NIPBL,NISCH,NKX2-2,NOTCH1,NSD1,OBSCN,PARK7,PCDHAC1,PDCD1,PHOX2B,PKP4,POLE,POSTN,PRB1/PRB2,PREPL,PRKAG1,PTPRU,RBFOX1,RELN,RP1L1,RRM1,SERINC2,SHANK2,ST13,SYNJ2,TBR1,TEK,TNN,TRIO,TSPYL5,TTN,TUBA1A,TUBA1C,VGF,WNT…	69
Molecular and Cellular Functions	Cellular Function and Maintenance	organization	Organization of cells	1.63e-05	0.000556	AGRN,ANK3,CHRNA7,CNTNAP4,DCC,DYSF,EP300,FN1,HCN1,MAPT,NCKIPSD,NEB,NLGN3,NLGN4X,OBSCN,SEMA3E,SHANK2,SLITRK1,TTN,TUBA1A,WNT5A,ZNF260	22
Diseases and Disorders	Cancer,Endocrine System Disorders,Organismal Injury and Abnormalities,Reproductive System Disease	serous adenocarcinoma	Serous adenocarcinoma in ovary	1.73e-05	0.00059	ADCY2,AGBL4,ALDH7A1,ASB3/GPR75-ASB3,BRPF3,CADPS2,CDH23,CDHR1,CELSR3,CLTCL1,CNTNAP5,CRKL,CSMD1,DNAH11,DNAH3,DNAH5,DNAH7,EXOC3L4,FBN3,GPR75,GTF2IRD1,HSP90AA1,IFIH1,IGF2BP1,KALRN,KCNH5,KLHL5,KMT2C,KMT2D,MACROD1,MPO,MUC16,MYO10,NCKAP5,NFE2L3,NLGN3,NPAS3,OBSCN,OSBPL2,P3H2,PCDH12,PCDHB12,PCDHGA2,PCDHGA9,PHF3,PLCH1,PREX1,PSMD7,PSME4,RELN,RIMBP2,SBNO1,SCN5A,SPAG17,TENM4,TMEM200B,TTN,ZNF260	58
Molecular and Cellular Functions	Cell-To-Cell Signaling and Interaction,Molecular Transport,Small Molecule Biochemistry	quantity	Quantity of monoamines	1.73e-05	0.00059	ALDH7A1,COMT,CRHR1,DRD2,FFAR3,GCG,GPR37,GTF2IRD1,HDC,MAPT,MCHR1,NOTCH1,NR4A2,OPRK1,PARK7,PNKD,PTPRN2,SEPTIN5,SLC23A2,SLC6A2,SLC6A4,SLITRK1,TEF,VGF	24
Molecular and Cellular Functions	Cell-To-Cell Signaling and Interaction,Molecular Transport,Small Molecule Biochemistry	quantity	Quantity of catecholamine	1.75e-05	0.000595	ALDH7A1,COMT,CRHR1,DRD2,FFAR3,GCG,GPR37,HDC,NR4A2,OPRK1,PARK7,PNKD,PTPRN2,SEPTIN5,SLC23A2,SLC6A2,SLC6A4,SLITRK1,TEF,VGF	20
Physiological System Development and Function	Organismal Development	morphology	Morphology of body cavity	1.78e-05	0.000605	ABCA7,ABCC1,ADM,AEBP1,AKAP9,AMH,ANK3,BCL11A,BHLHE40,BNC1,CACNA1D,CACNA1S,CACNA2D3,CADPS2,CASP8,CCDC134,CD47,CDKN1A,CELSR3,CEP85L,CHRNB4,COL9A2,COMT,CPEB1,CRHR1,CRKL,CTNNA3,CXCL14,DGCR8,DNAH11,DPP4,DPP6,DPP7,DRD2,DUSP6,EGFR,EP300,EPHB2,ERCC5,ERRFI1,ESR1,ETS1,FHIT,FHL2,FLT3,FN1,FPR2,GAK,GCG,GFUS,HCN4,HDC,HEXB,HIRA,HOXB4,HRH2,HS2ST1,IGF2BP1,ITGB6,JUND,KCNJ11,KIDINS220,KIRREL1,KLB,LOXL1,LTBP1,MANBA,M…	139
Diseases and Disorders	Gastrointestinal Disease,Inflammatory Disease,Inflammatory Response,Organismal Injury and Abnormalities,Respiratory Disease	pharyngitis	Pharyngitis	1.82e-05	0.000616	DRD2,GRIN2A,HRH2,OPRD1,OPRK1,OPRM1,PDE4A,SCN5A,SLC6A2,SLC6A4	10
Diseases and Disorders	Developmental Disorder,Neurological Disease,Organismal Injury and Abnormalities	complex neurocristopathy syndrome	Complex neurocristopathy syndrome	1.82e-05	0.000616	DGCR8,DRD2,EP300,HRH2,KMT2D,RERE,SEMA3E,SLC6A2,SLC6A4,TBX1	10
Physiological System Development and Function	Embryonic Development,Organismal Development	development	Development of body trunk	1.92e-05	0.000647	ADAMTS6,ADM,ADRM1,AEBP1,AGRN,AKAP9,ALPK3,AMH,ASH1L,CACNA1D,CASP8,CDKN1A,CDX2,CELSR3,CLCN2,COL5A1,COP1,CPEB1,CRHR1,CRKL,CSMD1,CX3CL1,CXCL14,DLC1,DNAH11,DNAH5,DUSP6,DYNC2H1,EGFR,EIF2B2,EP300,ERRFI1,ESR1,ETS1,FLT3,FN1,FOXP1,GAK,GEM,GPR149,HIRA,HOXB4,IGF2BP1,IMMP2L,ITGB6,KALRN,KDM5B,LAMA5,LMO4,LOXL1,LTBP1,MAPK3,MPL,MPV17,MRTFA,NCKIPSD,NEB,NIPBL,NKX2-2,NOTCH1,NPAS3,NR1H2,OBSCN,PDCD1,PDE9A,PHF14,PHF2,P…	104
Diseases and Disorders	Cancer,Gastrointestinal Disease,Organismal Injury and Abnormalities	small intestine tumor	Small intestine tumor	2.15e-05	0.000723	BCL7A,CD276,CDX2,CNTN6,EGFR,EP300,ERCC5,FLT3,GPRIN1,HSP90AA1,KBTBD12,KCNH7,KMT2C,KMT2D,MINAR1,NOTCH1,PDCD1,PDLIM7,PITPNM2,RGS12,RIMBP2,SLC23A2,SLCO6A1,TENM4,THBS1,TNIK,TRAF3,TRIO,UNC13C,WDSUB1,ZBTB20	31
Molecular and Cellular Functions | Physiological System Development and Function	Cell-To-Cell Signaling and Interaction,Nervous System Development and Function	action potential	Action potential of neurons	2.15e-05	0.000723	AMH,ANK3,CACNA1D,CACNA1I,CD47,CHRNA7,CNTNAP2,DPP6,HCN1,KCNC3,KCNJ11,KCNMB3,OPRM1,P2RX2,PARK7,RIMS1,SERPINE2,SHANK2,SLC6A4	19
Diseases and Disorders	Neurological Disease,Nutritional Disease,Organismal Injury and Abnormalities,Psychological Disorders	anorexia nervosa	Anorexia nervosa	2.16e-05	0.000723	DRD2,ESR1,GABRA2,GABRB3,GABRG1,OPRD1,OPRK1,OPRM1,SLC6A2,SLC6A4	10
Diseases and Disorders	Cancer,Organismal Injury and Abnormalities,Skeletal and Muscular Disorders	embryonal rhabdomyosarcoma	Embryonal rhabdomyosarcoma	2.17e-05	0.000726	AGRN,ASPN,CACNA1S,CENPT,CNTN6,CRKL,CTNNA3,DLEC1,DOP1B,DPP6,ERCC5,FSCB,ICE1,INO80D,KLB,KMT5A,LRPPRC,MINAR1,MUC6,NCKAP5L,NINL,NOTCH1,NSD1,OBSCN,PCDHGA2,PCDHGA9,PI4KA,RP1L1,RUNX1T1,SCN5A,SF3A2,SORCS3,TGFBRAP1,TJP1,TTN,TUBA1A,TUBA1C,ZNF83	38
Physiological System Development and Function	Tissue Morphology	quantity	Quantity of cells	2.18e-05	0.000726	ACTR3,ADM,AGRN,AMH,ANK3,ATN1,BCL11A,BHLHE40,BIRC6,BST1,CACNA1D,CADPS2,CASP8,CBR3,CD276,CD302,CD47,CDH23,CDK2AP1,CDKN1A,CDX2,CELSR3,CHRNA7,CLCA1,CNTNAP2,COL5A1,COMT,CX3CL1,CXCL14,DCC,DGCR8,DIABLO,DIO2,DRD2,DUSP6,DYSF,EFL1,EGFR,ENO1,EP300,EPHB2,ERC2,ERRFI1,ESR1,ETS1,FARP2,FFAR3,FHL2,FLT3,FN1,FPR1,FPR2,GCG,GFUS,GPR37,HDC,HEXB,HOXB4,HRH2,IFIH1,IGF2BP1,IL17RB,ITGB6,KALRN,KCNJ11,KDM5B,KIDINS220,KIF20B,…	157
Diseases and Disorders	Cancer,Organismal Injury and Abnormalities,Skeletal and Muscular Disorders	myosarcoma	Myosarcoma	2.23e-05	0.000742	AGRN,ASPN,CACNA1S,CDKN1A,CENPT,CNTN6,CRKL,CTNNA3,DLEC1,DOP1B,DPP6,ERCC5,ESR1,FN1,FSCB,ICE1,INO80D,KLB,KMT2C,KMT2D,KMT5A,LRPPRC,MINAR1,MUC6,NCKAP5L,NINL,NOTCH1,NSD1,OBSCN,PCDHGA2,PCDHGA9,PI4KA,POSTN,RERE,RP1L1,RRM1,RUNX1T1,SCN5A,SF3A2,SORCS3,TGFBRAP1,TJP1,TTN,TUBA1A,TUBA1C,ZBTB20,ZNF83	47
Diseases and Disorders	Cancer,Hematological Disease,Immunological Disease,Organismal Injury and Abnormalities	diffuse small-cell lymphoma	Diffuse small-cell lymphoma	2.23e-05	0.000742	ABCC1,ADSL,AGBL4,ATN1,BAZ2B,BCL7A,BIRC6,CDH7,CLCA4,CNTNAP4,CNTNAP5,DNAH5,DOP1B,EDC4,EGFR,EP300,ETS1,FBN2,HSP90AA1,IMMP2L,KALRN,KLC1,KMT2C,KMT2D,MCRS1,MDGA2,MUC16,NEB,NFE2L3,NOTCH1,NPAS3,NRXN1,PCDHB13,PCDHGA2,PCDHGA9,PIM1,POLD1,POLE,POSTN,PSME4,RIMS1,RRM1,SBNO1,SEMA3E,SLC23A1,SLC4A10,SLC7A4,STARD5,STK38,TANC1,TEAD2,TNFRSF13C,TNIK,TUBA1A,TUBA1C,UNC13C	56
Diseases and Disorders	Cancer,Hematological Disease,Immunological Disease,Organismal Injury and Abnormalities	non-Hodgkin disease	Indolent non-Hodgkin lymphoma	2.25e-05	0.000745	ABCC1,AGBL4,BAZ2B,BIRC6,CLCA4,CNTNAP4,CNTNAP5,DNAH5,DOP1B,EGFR,EP300,FBN2,HSP90AA1,IMMP2L,KALRN,KLC1,KMT2D,MCRS1,MDGA2,MUC16,NEB,NFE2L3,NOTCH1,NPAS3,NRXN1,PCDHB13,PCDHGA2,PCDHGA9,POLE,POSTN,PSME4,RIMS1,RRM1,SBNO1,SEMA3E,SLC23A1,SLC4A10,SLC7A4,STARD5,STK38,TANC1,TEAD2,TNIK,TUBA1A,TUBA1C,UNC13C	46
Diseases and Disorders | Physiological System Development and Function	Behavior,Organismal Injury and Abnormalities,Psychological Disorders	self-abusive behavior	Self-abusive behavior	2.28e-05	0.000751	OPRD1,OPRK1,OPRM1,SLC6A4	4
Diseases and Disorders	Organismal Injury and Abnormalities	chronic pain	Severe chronic pain	2.28e-05	0.000751	OPRD1,OPRK1,OPRM1,SLC6A2	4
Diseases and Disorders	Gastrointestinal Disease,Organismal Injury and Abnormalities	opioid induced constipation	Opioid induced constipation	2.28e-05	0.000751	CLCN2,OPRD1,OPRK1,OPRM1	4
Diseases and Disorders	Organismal Injury and Abnormalities	extraintestinal functional disorder	Extraintestinal functional disorder	2.35e-05	0.000771	CACNA1D,CACNA1I,CACNA1S,CACNA2D3,CADPS2,CDKN1A,CHGB,CHRNA7,COMT,CRHR1,CSGALNACT2,DCC,DRD2,EGFR,ESR1,GABRA2,GABRB3,GABRG1,GRIN2A,HOXB4,HRH2,KCNJ11,MCHR1,NPAS3,NR1H2,NRXN1,OPRD1,OPRK1,OPRM1,PDE4A,PHF14,PHOX2B,RBFOX1,RCAN1,SCN5A,SERINC2,SLC6A2,SLC6A4,SLITRK1,SPAG17,TCOF1,TUBA1A,TUBA1C	43
Diseases and Disorders	Cancer,Organismal Injury and Abnormalities	clear-cell adenocarcinoma	Clear-cell adenocarcinoma	2.47e-05	0.000812	ABCB9,ADAM23,ADCY2,AKAP9,ALDH7A1,ARHGAP26,BHLHE40,BRPF3,CACNA1S,CADM2,CDH23,CDKN1A,CLCA1,CLCN2,CSMD1,CSMD3,DGCR6/LOC102724770,DLC1,DLX6,DNAH7,DPP6,EDC4,EGFR,EMB,EP300,EPHB2,ERCC5,FBN2,FBXL17,FLG,FLT3,FN1,GABRB3,GNPDA2,GPRIN1,GRIN2A,GUF1,HCN4,HNRNPLL,HSP90AA1,IGSF10,IGSF3,KDM5B,KMT2C,KMT2D,MAP3K4,MAU2,MINAR1,MUC16,MUC6,NAPSA,NFE2L3,NGEF,NOTCH1,NPAS3,NPRL2,NSD1,NUDT17,OGFOD2,PCDH11X,PCDH17,PCDH7,PC…	99
Diseases and Disorders	Cancer,Hematological Disease,Immunological Disease,Organismal Injury and Abnormalities	B-cell non-Hodgkin lymphoma	Indolent B-cell non-Hodgkin lymphoma	2.52e-05	0.000827	ABCC1,AGBL4,BAZ2B,BIRC6,CLCA4,CNTNAP4,CNTNAP5,DNAH5,DOP1B,EGFR,EP300,FBN2,IMMP2L,KALRN,KLC1,KMT2D,MCRS1,MDGA2,MUC16,NEB,NFE2L3,NOTCH1,NPAS3,NRXN1,PCDHB13,PCDHGA2,PCDHGA9,POLE,POSTN,PSME4,RIMS1,RRM1,SBNO1,SEMA3E,SLC23A1,SLC4A10,SLC7A4,STARD5,STK38,TANC1,TEAD2,TNIK,TUBA1A,TUBA1C,UNC13C	45
Molecular and Cellular Functions	Cell-To-Cell Signaling and Interaction,Drug Metabolism,Molecular Transport,Small Molecule Biochemistry	uptake	Uptake of dopamine	2.6e-05	0.000848	DRD2,GPR37,NAT8L,OPRK1,PARK7,SLC6A2,TOR1A	7
Diseases and Disorders	Neurological Disease,Organismal Injury and Abnormalities	tension headaches	Tension headaches	2.6e-05	0.000848	GABRA2,GABRB3,GRIN2A,OPRD1,OPRK1,OPRM1,PDE4A	7
Diseases and Disorders	Hereditary Disorder,Neurological Disease,Ophthalmic Disease,Organismal Injury and Abnormalities	autosomal recessive optic atrophy	Autosomal recessive optic atrophy	2.6e-05	0.000848	ACO2,AP3B2,MECR,OPA1,POLR3H,UCHL1,ZNHIT3	7
Diseases and Disorders	Inflammatory Response,Organismal Injury and Abnormalities,Respiratory Disease	inflammation	Inflammation of respiratory system component	2.7e-05	0.000877	ABCC1,ACO2,CD276,CDKN1A,CHRNA7,CLCA1,CTNNA3,DNAH1,DNAH5,DPP4,DRD2,ENO1,FLG,FN1,FPR2,GABRB3,GABRG1,GRIN2A,HRH2,IFIH1,IL17RB,ITGB6,MAPK3,MPO,NEO1,NR1H2,OPRD1,OPRK1,OPRM1,P2RX2,PDCD1,PDE4A,PIKFYVE,POSTN,PREX1,PRMT1,SCN5A,SELE,SEMA3E,SERINC2,SLC6A2,SLC6A4,SRSF3,ST3GAL3,STING1,TANK,THBS1,TNIP2,TRAF3,TRIO,TUBA1A,TUBA1C,WNT1,WNT5A	54
Diseases and Disorders	Organismal Injury and Abnormalities,Skeletal and Muscular Disorders	musculoskeletal pain	Musculoskeletal pain	2.89e-05	0.000936	CACNA1I,CACNA2D3,DRD2,GABRA2,GABRB3,GABRG1,GRIN2A,OPRD1,OPRK1,OPRM1,SCN5A,SLC6A2,SLC6A4	13
Diseases and Disorders	Organismal Injury and Abnormalities,Skeletal and Muscular Disorders	pain	Pain of muscle	2.89e-05	0.000937	CACNA1I,CACNA2D3,DRD2,GABRA2,GABRB3,GABRG1,OPRD1,OPRK1,OPRM1,SCN5A,SLC6A2,SLC6A4	12
Diseases and Disorders	Cardiovascular Disease,Neurological Disease,Organismal Injury and Abnormalities	stroke	Stroke	2.99e-05	0.000966	CACNA1D,CACNA1S,CACNA2D3,CHRNA7,CHRNB4,COL4A2,DRD2,ESR1,FN1,FPR1,GABRA2,GABRB3,GABRG1,GRIN2A,KCNH7,KCNJ11,LMO4,MAPT,MGAM,OPRD1,OPRM1,PDE4A,SCN5A,SERPIND1,SLC6A2,SLC6A4,THBS1,TUBA1A,TUBA1C	29
Physiological System Development and Function	Behavior,Nervous System Development and Function	passive avoidance learning	Passive avoidance learning	3.01e-05	0.000972	CD47,CHRNA7,ESR1,HDC,KALRN,MAPK3,MAPT,MCHR1,NR4A2	9
Diseases and Disorders	Cancer,Organismal Injury and Abnormalities,Reproductive System Disease,Skeletal and Muscular Disorders	uterine smooth muscle tumor	Uterine smooth muscle tumor	3.16e-05	0.00102	ABI2,ASPN,CAPN6,CLDN5,COL5A1,COL6A3,CXCL14,DLEC1,EGFR,ESR1,HAUS3,IFIH1,KMT2D,LAMA5,LTBP1,MAPK3,MAU2,MDH1,MGST1,NEGR1,NOTCH1,NR1H2,NR4A2,OLFM1,PI4KA,POSTN,RERE,RRM1,STING1,TEK,TUBA1A,TUBA1C,ZBTB20,ZDHHC17	34
Diseases and Disorders	Cardiovascular Disease,Organismal Injury and Abnormalities	arrhythmia with structural heart disease	Arrhythmia with structural heart disease	3.25e-05	0.00104	AKAP9,CACNA1D,CACNA1S,CACNA2D3,CEP85L,CTNNA3,DPP6,FHL2,GABRA2,GABRB3,HCN4,KCNH7,KCNMB3,MPO,SCN5A,SERINC2,SLC6A2,SLC6A4,TJP1,TRIO,TTN,TUBA1A,TUBA1C	23

## Sheet: S3-c. Upstream Regulators
Upstream Regulator	Molecule Type	p-value of overlap	B-H corrected p-value	Target Molecules in Dataset
molybdenum disulfide	chemical reagent	7.37e-05	0.174	AGRN,BST1,CKB,COL4A2,COL5A1,DUSP6,FLG,FN1,LAMA5,LIMCH1,MGST1,RCAN1,SORT1,TEK,TENM2,THBS1
protein phosphatase	complex	5.25e-05	0.174	DGCR8,ESR1,PIM1
topotecan	chemical drug	0.000282	0.325	ASTN2,CAMK1D,CDKN1A,CNTNAP2,CSMD1,ENO1,ESS2,FHIT,KALRN,MDGA2,NCKAP5,NRXN1,NXPH1,RBFOX1,RELN,SESN2,SRSF3,TANK
MIR17HG	other	0.000274	0.325	BBX,CDKN1A,COL5A1,FBN2,HOXB4,LAMA5,LTBP1,PIAS4,PTPRU,SEL1L,SEMA3E,SORT1,TOB2,WNT5A
RECK	other	0.000344	0.325	CDKN1A,EGFR,NOTCH1,SPRY2
NEDD4	enzyme	0.000549	0.371	CDKN1A,DUSP6,ERRFI1,FN1,SPRY2
DSCAML1	other	0.000539	0.371	ANK3,CRHR1,EGFR,MAPT,NGEF,NPAS3,NRCAM,PCDH17,RIMS1,SHANK2,VGF
GnRH analog	biologic drug	0.00189	0.379	ABCC1,BHLHE40,CACNA1D,CASP8,DNAJC8,EDC4,EIF2B2,ERCC5,ESR1,FN1,HAUS3,MAPK3,MARF1,MPV17,NDUFB1,NR4A2,NUTF2,PI4KA,RBMS1,RELN,RPA2,SRSF3,TMBIM6,TUBA1A
tazemetostat	chemical drug	0.000978	0.379	BCL11A,CNTNAP2,EGFR,ESR1,FN1,IGF2BP1,KIDINS220,LTBP1,MRTFA,NOTCH1,NR4A2,NRXN1,NSD1,NSD3,OLFM1,POLE,POU4F2,PREX1,PTBP2,RBX1,SLC43A1,UCHL1,USF2,WNT3
etorphine	chemical drug	0.0014	0.379	OPRK1,OPRM1
THZ2	chemical drug	0.00172	0.379	CDKN1A,FHL2,FOXP1,IGF2BP1,SRSF3
daunorubicin	chemical drug	0.00175	0.379	ABCA2,ABCA7,ABCC1,ABCC6,CDKN1A,PFKM
SP2509	chemical reagent	0.00161	0.379	BCL11A,CNTNAP2,EGFR,ESR1,FN1,IGF2BP1,KIDINS220,LTBP1,MRTFA,NOTCH1,NR4A2,NRXN1,NSD1,NSD3,OLFM1,POU4F2,PREX1,PTBP2,RBX1,SLC43A1,UCHL1,USF2,WNT3
2-nitrotoluene	chemical toxicant	0.0014	0.379	FHIT,WWOX
KRAS	enzyme	0.000956	0.379	ACTR3,AGRN,AQP5,BNC1,CDKN1A,CX3CL1,CXCL14,DBN1,DUSP6,EGFR,ENO1,FKBP11,FN1,HIRA,IP6K2,ITGB6,LAMA5,MAP1LC3B,MAPK3,MECR,MRC1,MUC16,MUC6,NCL,NEO1,NGEF,NSF,NUTF2,PI4KA,PIM1,POMP,PRPH,PRSS3,RANBP1,RHEBL1,SERPINE2,SLC26A2,SORT1,SOS1,SPRY2,SRSF3,STK38,TCOF1,TEAD2,THBS1,TIMP2,TNFAIP2,TNIK,TRMT2A,XRN2
OPRM1	G-protein coupled receptor	0.00107	0.379	ADM,EGFR,OPRM1,TLN2
ANGPT2	growth factor	0.00143	0.379	ABCC1,CDKN1A,COMT,EGFR,ETS1,FN1,HSP90AA1,MGST1,POLD1,POSTN,RCAN1,RPA2,ST13,TEK,THBS1,TNIK,WNT1,WNT3
TGFB3	growth factor	0.00185	0.379	ASPN,BHLHE40,CDKN1A,COL5A1,ETS1,FN1,JUND,MYO10,SDC3,SERPINE2,THBS1,TJP1
miR-30c-5p (and other miRNAs w/seed GUAAACA)	mature microRNA	0.000852	0.379	COL4A2,COL5A1,COL8A1,MYO10,NCL,NOTCH1,PCDH17,PEX11B,RBMS1,SLC4A10,TMED3,TNFAIP2,TNRC6A,WNT1,WNT5A
STOX1	other	0.00145	0.379	AHCY,FSIP1,MAPT,SRSF7
LAS1L	other	0.00192	0.379	CDKN1A,CHST6,CPT1C,DUSP6,MAP1LC3B,MXD4,SESN2,SNORA79
TEAD4	transcription regulator	0.000675	0.379	ADM,CDKN1A,CDX2,EGFR,GPR37,LIMCH1,LOXL1,PDGFRL,POSTN,RANBP1,RCAN1,THBS1
GATA3	transcription regulator	0.00113	0.379	ADM,BCL11A,CDKN1A,CDX2,ERCC5,ESR1,ETS1,FN1,IL17RB,LOC102724788/PRODH,MYO10,NOTCH1,OPRM1,PDCD1,RCAN1,SLC27A2,SLCO4C1,TEK,TJP1,ZNF560
NUP62	transporter	0.00192	0.379	CDKN1A,EGFR,FLG,WWC1
decitabine	chemical drug	0.00272	0.405	ABCC1,ADAM23,AGRN,BCL11A,CASP8,CDKN1A,CLDN5,CNTNAP2,COL6A3,COMT,DLC1,DLEC1,DNAJC15,EGFR,ESR1,FBN2,FLG,FN1,GPR37,GRIN2A,HTRA3,IGF2BP1,KIDINS220,LTBP1,MRTFA,NOTCH1,NR4A2,NRXN1,NSD1,NSD3,OLFM1,OPRD1,PDE9A,POU4F2,PREX1,PTBP2,RBX1,RELN,SLC43A1,SLC4A10,THBS1,TIMP2,UCHL1,USF2,VAMP7,WNT10B,WNT3,WNT5A
sunitinib	chemical drug	0.00288	0.405	CDKN1A,COL4A2,COL5A1,COL8A1,FN1,KIRREL1,PDCD1,TIMP2
estradiol valerate	chemical drug	0.00316	0.405	ESR1,ITGB6,LTBP1,THBS1
acyclic retinoid	chemical drug	0.00394	0.405	CDKN1A,COL4A2,TEK,TIMP2
SIRT7	enzyme	0.00316	0.405	CDKN1A,GFM2,MRPL40,RPS21
CNOT6	enzyme	0.00372	0.405	CDKN1A,LMO3,SEMA3E
CNOT6L	enzyme	0.00394	0.405	CDKN1A,CPEB1,LMO3,SEMA3E
gelatinase	group	0.00411	0.405	CLDN5,TJP1
miR-485-3p (and other miRNAs w/seed UCAUACA)	mature microRNA	0.00411	0.405	HCN1,KMT2C
mir-8	microRNA	0.00301	0.405	BST1,CD47,CDKN1A,CRKL,EGFR,EP300,ERRFI1,ETS1,FN1,ITGB6,KCNK1,MPRIP,SERPINE2,SPRY2,TIMP2,TJP1
STAG1	other	0.00255	0.405	PCDH11X,PCDH17,PCDH7
RPL11	other	0.00372	0.405	CDKN1A,IGF2BP1,NCL
NPHS1	other	0.00411	0.405	KIRREL1,TJP1
COL7A1	other	0.00411	0.405	THBS1,WNT5A
KIRREL1	other	0.00411	0.405	KIRREL1,TJP1
KLF17	transcription regulator	0.00249	0.405	CDKN1A,FN1,IL31,TJP1
EMX2	transcription regulator	0.00255	0.405	EGFR,RELN,WNT1
TEAD2	transcription regulator	0.00279	0.405	ADM,GPR37,LIMCH1,LOXL1,PDGFRL,POSTN,THBS1
TEAD3	transcription regulator	0.00312	0.405	ADM,GPR37,LIMCH1,LOXL1,PDGFRL,POSTN,THBS1
EGR2	transcription regulator	0.0032	0.405	ABCC1,BHLHE40,CDKN1A,CHRNA7,CLCN2,DDN,DIO2,GRIN2A,GTF2A1,NCL,NOTCH1,NSF,POU3F2,TXNRD2
MED15	transcription regulator	0.00372	0.405	CDKN1A,CLCA2,KCNK1
RB1	transcription regulator	0.00383	0.405	ACO2,ASPN,CACNA1S,CASP8,CDKN1A,CDX2,CELSR3,COL4A2,COL5A1,DIO2,FN1,GEM,GPR157,GPR63,GPR75,KCNK1,MAPK3,MDH1,MECR,NDUFA13,NDUFA4,NDUFA6,NR4A2,OPA1,PARK7,PIM1,RANBP1,ROBO3,RRM1,SH3BP2,TOB2,TUBA1A
MYCN	transcription regulator	0.00409	0.405	ABCA2,ABCA7,ABCB9,ABCC1,ABCF2,ADAM23,ANK3,BCL11A,CDKN1A,COL8A1,EEF2,EFNA5,EGFR,FN1,KDM5B,NCL,POU4F3,RELN,SLITRK1,TIMP2,TM6SF1,TUBA1B,UCHL1
HOXB2	transcription regulator	0.00411	0.405	NKX2-2,PHOX2B
LAMA4	enzyme	0.0043	0.415	COL5A1,COL6A3,EGFR,FN1,LAMA5,MGST1,NOTCH1,THBS1,TLN2,TNN
panitumumab	biologic drug	0.0375	0.426	EGFR
lipoxin A4	chemical - endogenous mammalian	0.00711	0.426	CDKN1A,ESR1,FN1,FPR2,SELE,TIMP2
lysophosphatidylinositol	chemical - endogenous mammalian	0.00875	0.426	CX3CL1,FPR1,PFKM,SELE,SGPP2,STAB2
palmitoleic acid	chemical - endogenous mammalian	0.014	0.426	MPO,MRC1,RICTOR
sorbitol	chemical - endogenous mammalian	0.017	0.426	AQP5,CDKN1A,ERRFI1
hydrocortisone	chemical - endogenous mammalian	0.0192	0.426	ADM,ALDH18A1,CRHR1,EP300,ERRFI1,FN1,LY75,MAP3K4,NDUFA6,PDCD1,SELE,TNFAIP2
4-phenylbutyric acid	chemical - endogenous mammalian	0.0225	0.426	CACNA2D3,CASP8,CDKN1A,CLDN5,MARCHF7,PARK7,TIMP2,TJP1,VAMP7
manganese	chemical - endogenous mammalian	0.0241	0.426	CDKN1A,DRD2,PARK7
bile acid	chemical - endogenous mammalian	0.0373	0.426	CDX2,DIO2,HDC,SLC23A2
cortodoxone	chemical - endogenous mammalian	0.0375	0.426	FN1
propionyl-L-carnitine	chemical - endogenous mammalian	0.0375	0.426	SELE
tryptamine	chemical - endogenous mammalian	0.0375	0.426	GCG
brefeldin A	chemical - endogenous non-mammalian	0.00579	0.426	CHRNA7,ESR1,OPRK1,OPRM1,SESN2,STARD5,THBS1
tunicamycin	chemical - endogenous non-mammalian	0.019	0.426	CDKN1A,CLDN5,EGFR,ETS1,FKBP11,FN1,GP1BB,HGSNAT,ICA1,LMAN2,MORF4L2,SEL1L,SESN2,STARD5,TBCB,TJP1,TMED3,TMEM67
soraphen-A1alpha	chemical - endogenous non-mammalian	0.0375	0.426	RICTOR
broussoflavonol b	chemical - endogenous non-mammalian	0.0375	0.426	ESR1
7-bromoindirubin-3'-oxime	chemical - kinase inhibitor	0.0375	0.426	CDKN1A
4-(2-aminoethyl)benzenesulfonylfluoride	chemical - protease inhibitor	0.0373	0.426	CDKN1A,FBN2,FN1,TNN
sulpiride	chemical drug	0.00517	0.426	DRD2,LTBP1,THBS1
bupivacaine	chemical drug	0.00517	0.426	GTF2IRD1,JUND,MPO
nicotine	chemical drug	0.00674	0.426	CACNA1D,CDKN1A,CHGB,CHRNA7,CHRNB4,ENO1,FLG,FN1,GRIN2A,KCNJ11,KMT2C,MDH1,NSF,PLCH1,POSTN,SELE,WNT5A
sodium tungstate	chemical drug	0.00726	0.426	ACO2,CKB,ENO1,SEPTIN5,TUBA1A
camptothecin	chemical drug	0.00893	0.426	ABCF2,AKAP9,BCL11A,BIRC6,CASP8,CD47,CDKN1A,DUSP6,EGFR,FPR1,GPLD1,HAUS3,LIMCH1,LOC102724788/PRODH,LRRC14,LY75,MPHOSPH9,MYO10,NCL,NR4A2,PALM2AKAP2,PDLIM7,PKN2,PTPRN2,RBMS1,RRM1,SELE,SPINK1,SPRY2,STK38,SYNJ2,TLK1,TLN2,TRAF3,VRK2
verteporfin	chemical drug	0.00983	0.426	CDKN1A,EGFR,FN1,RANBP1
CD 437	chemical drug	0.0106	0.426	AMH,CDKN1A,EEF2,ENO1,HMGN2,HSP90AA1,KARS1,MGST1,RBX1,SELENOF,SRSF3,ST13,TUBA1A,TUBA1B,XRN2
calcitriol	chemical drug	0.0116	0.426	ARHGEF3,CACNA1D,CDC45,CDKN1A,CELSR3,COL4A2,COMT,EFL1,EGFR,EPHB2,ERRFI1,ESR1,FBN2,FLG,FN1,GEM,GUF1,HOXB4,LRPPRC,LTBP1,MRC1,NDUFA4,NUBPL,OPA1,P3H2,PDE9A,POLE,RPA2,RUNX1T1,SLC25A1,SPRY2,THBS1,TIMP2,TJP1,TLK1,TSHR
benidipine	chemical drug	0.013	0.426	CDKN1A,SELE
naltrindole	chemical drug	0.014	0.426	LRRC14,OPRD1,OPRM1
GW7647	chemical drug	0.0173	0.426	ABCC1,EP300,SLC23A1,SLC27A2
haloperidol	chemical drug	0.0185	0.426	CACNA1D,DPP6,DRD2,GRIN2A,NR4A2,PRKAR2A,SPRY2,WNT5A
PF-573228	chemical drug	0.019	0.426	LOXL1,TJP1
LGK-974	chemical drug	0.019	0.426	COL6A3,WNT3
enzastaurin	chemical drug	0.019	0.426	CLDN5,TJP1
leucine-2-alanine enkephalin	chemical drug	0.019	0.426	OPRD1,OPRM1
ST1926	chemical drug	0.0192	0.426	AMH,CDKN1A,EEF2,ENO1,HMGN2,HSP90AA1,KARS1,MGST1,RBX1,SELENOF,SRSF3,ST13
SJN 2511	chemical drug	0.026	0.426	CLDN5,TJP1
flupenthixol	chemical drug	0.026	0.426	DRD2,GRIN2A
fluphenazine	chemical drug	0.026	0.426	DRD2,NR4A2
tyrphostin AG825	chemical drug	0.026	0.426	CDKN1A,LMO4
bisindolylmaleimide I	chemical drug	0.0263	0.426	CDKN1A,EGFR,FN1,JUND,KCNJ11,MAPK3,NR4A2,RCAN1,TJP1
imatinib	chemical drug	0.0298	0.426	BIRC6,CASP8,CDC45,CDKN1A,FN1,IP6K2,LMAN2,LOC102724788/PRODH,MED15,NCL,NDUFA13,NDUFA4,NDUFA6,PIM1,POLD1,RAB18,SH3GLB1,SRSF7,TADA3,ZDHHC17
grape seed extract	chemical drug	0.0307	0.426	CDKN1A,CKB,ENO1,MPO
linsidomine	chemical drug	0.0307	0.426	AQP5,CRHR1,OPRK1,SLC23A2
selenium	chemical drug	0.0307	0.426	CDKN1A,DRD2,MRC1,SELENOF
epicatechin	chemical drug	0.0309	0.426	AMH,CLCA2,COL4A2,COL5A1,HTRA3,NOTCH1,POSTN,SLC27A2
deferoxamine	chemical drug	0.0324	0.426	ADM,BHLHE40,CD47,CDKN1A,EGFR,ENO1,ERRFI1,GEM,LY75,MAP1LC3B,NR4A2,OPA1,SELE,SERPINE2
emodin	chemical drug	0.0325	0.426	ABCC1,CDKN1A,CLDN5,FN1,MRC1,SELE
proteasome inhibitor	chemical drug	0.0338	0.426	OPRD1,OPRM1
LY-3009120	chemical drug	0.0338	0.426	DUSP6,SPRY2
methadone	chemical drug	0.0338	0.426	OPRD1,OPRM1
dihematoporphyrin ether	chemical drug	0.0338	0.426	CDKN1A,EGFR
clodronic acid	chemical drug	0.0339	0.426	ITGB6,MRC1,SELE,WNT10B
abemaciclib	chemical drug	0.0373	0.426	AGRN,CLCA2,ESR1,VGF
beta-escin	chemical drug	0.0375	0.426	CDKN1A
omigapil	chemical drug	0.0375	0.426	MAPT
alogliptin	chemical drug	0.0375	0.426	GCG
olesoxime	chemical drug	0.0375	0.426	MPO
ZM 323881	chemical drug	0.0375	0.426	RCAN1
PX-866	chemical drug	0.0375	0.426	SORT1
tiapride	chemical drug	0.0375	0.426	DRD2
inolitazone	chemical drug	0.0375	0.426	CDKN1A
HCV 796	chemical drug	0.0375	0.426	MAP1LC3B
dimethyl fumarate/ethyl fumarate	chemical drug	0.0375	0.426	SELE
namitecan	chemical drug	0.0375	0.426	EGFR
metalloproteinase inhibitor	chemical drug	0.0375	0.426	EGFR
ethylketocyclazocine	chemical drug	0.0375	0.426	OPRK1
diprenorphine	chemical drug	0.0375	0.426	OPRM1
BMS-275183	chemical drug	0.0375	0.426	THBS1
BW-755C	chemical drug	0.0375	0.426	JUND
asimadoline	chemical drug	0.0375	0.426	OPRK1
gatifloxacin	chemical drug	0.0375	0.426	GCG
AX15910	chemical drug	0.0375	0.426	SELE
hydrocortisone butyrate	chemical drug	0.0375	0.426	PDCD1
tolcapone	chemical drug	0.0375	0.426	COMT
amisulpride	chemical drug	0.0375	0.426	DRD2
salvinorin a	chemical drug	0.0375	0.426	OPRK1
oxymorphone	chemical drug	0.0375	0.426	OPRM1
bremazocine	chemical drug	0.0375	0.426	OPRK1
nalorphine	chemical drug	0.0375	0.426	OPRM1
nalfurafine	chemical drug	0.0375	0.426	OPRK1
droperidol	chemical drug	0.0375	0.426	DRD2
CaCCinh-A01	chemical reagent	0.00801	0.426	EGFR,NOTCH1
ethyl protocatechuate	chemical reagent	0.013	0.426	CDKN1A,ENO1
pyrimidin-2-one beta-ribofuranoside	chemical reagent	0.014	0.426	CDKN1A,DRD2,RELN
AF-2364	chemical reagent	0.017	0.426	ACTR3,MAPK3,RICTOR
PT1001B	chemical reagent	0.019	0.426	FN1,PRMT1
DIM-C-pPhOH-3-Cl-5-OCH3	chemical reagent	0.0241	0.426	EGFR,FN1,PFKM
BC-1215	chemical reagent	0.026	0.426	RIMS1,TRAF3
A-769662	chemical reagent	0.0325	0.426	CPS1,EP300,FN1
GSK0660	chemical reagent	0.0338	0.426	FN1,THBS1
N-formyl-Nle-Leu-Phe	chemical reagent	0.0375	0.426	FPR1
TDP-665759	chemical reagent	0.0375	0.426	CDKN1A
UNC 0642	chemical reagent	0.0375	0.426	MAP1LC3B
annonacin	chemical reagent	0.0375	0.426	MAPT
UNC1999	chemical reagent	0.0375	0.426	KDM5B
PF 956980	chemical reagent	0.0375	0.426	SORT1
NSC 126405	chemical reagent	0.0375	0.426	CDKN1A
SID7969543	chemical reagent	0.0375	0.426	AMH
beta-funaltrexamine	chemical reagent	0.0375	0.426	OPRM1
tin	chemical reagent	0.0375	0.426	ESR1
forskolin	chemical toxicant	0.00685	0.426	ADM,ADSL,AQP5,BHLHE40,CACNA1I,CDKN1A,CHGB,CHRNB4,CMTM5,CRHR1,DIO2,DUSP6,ERRFI1,ESR1,FN1,GCG,GEM,JUND,KIDINS220,MACROD1,MAP1LC3B,MAPK3,MRTFA,NR4A2,OPA1,OPRM1,PCDH11X,PDE4A,PRKAR2A,RANGAP1,RNF4,RRM1,SERINC2,SYNJ2,TCF20,THBS1,TJP1,TLK1,TMBIM6,TSHR,TUBA1A,VGF
methyleugenol	chemical toxicant	0.00801	0.426	FHIT,WWOX
1,2,3,4,7,8-hexachlorodibenzofuran	chemical toxicant	0.013	0.426	COMT,ESR1
octachlorodibenzo-4-dioxin	chemical toxicant	0.013	0.426	COMT,ESR1
2,3,4,6,7,8-hexachlorodibenzofuran	chemical toxicant	0.013	0.426	COMT,ESR1
1,2,3,7,8-pentachlorodibenzo-p-dioxin	chemical toxicant	0.013	0.426	COMT,ESR1
1,2,3,4,6,7,8-heptachlorodibenzo-p-dioxin	chemical toxicant	0.013	0.426	COMT,ESR1
1,2,3,7,8,9-hexachlorodibenzo-p-dioxin	chemical toxicant	0.013	0.426	COMT,ESR1
octachlorodibenzofuran	chemical toxicant	0.013	0.426	COMT,ESR1
1,2,3,6,7,8-hexachlorodibenzofuran	chemical toxicant	0.013	0.426	COMT,ESR1
1,2,3,4,7,8-hexachlorodibenzo-p-dioxin	chemical toxicant	0.013	0.426	COMT,ESR1
1,2,3,4,6,7,8-heptachlorodibenzofuran	chemical toxicant	0.013	0.426	COMT,ESR1
2,3,7,8-tetrachlorodibenzofuran	chemical toxicant	0.013	0.426	COMT,ESR1
arsenic	chemical toxicant	0.0248	0.426	EGFR,ESR1,HSP90AA1,SPINK1
3,4,5,3',4',5'-hexachlorobiphenyl	chemical toxicant	0.026	0.426	COMT,ESR1
chromomycin A3	chemical toxicant	0.0375	0.426	CX3CL1
diisopropanolnitrosamine	chemical toxicant	0.0375	0.426	CDKN1A
Laminin (complex)	complex	0.0217	0.426	CHGB,EGFR,FN1,MAPT,WNT5A
PDGF BB	complex	0.0245	0.426	ADM,BHLHE40,CDKN1A,COL5A1,DUSP6,EGFR,ETS1,FHL2,FN1,GEM,HOMER2,MAP3K4,MGST1,NR4A2,OSBPL2,PIM1,POSTN,SLC6A4,SPRY2,SRSF7,THBS1
hemoglobin	complex	0.0281	0.426	ADM,CDKN1A,MGST1
FSH	complex	0.0349	0.426	ADM,AMH,ATP5IF1,BCL11A,CX3CL1,EGFR,ESR1,GEM,GRIN2A,KIDINS220,LZTR1,MAP1LC3B,MAPT,NEO1,RANGAP1,RGS12,THBS1,TIMP2,TLK1,TMBIM6,TUBA1A,VGF,YTHDF2
S100	complex	0.0375	0.426	SLC6A4
G protein q	complex	0.0375	0.426	RCAN1
IL17B	cytokine	0.026	0.426	CDKN1A,IL17RB
CYBA	enzyme	0.00691	0.426	CDKN1A,FN1,PIM1
GGT1	enzyme	0.00801	0.426	CLCA1,EGFR
HSP90AB1	enzyme	0.00983	0.426	ABCC1,ESR1,KCNJ11,SLC6A4
DDX25	enzyme	0.0119	0.426	CHADL,DGCR8,DIABLO,DNAJB7,EP300,PDZK1,PEX2,PPP2R2B,RANGAP1,TSSK2
SNCA	enzyme	0.0122	0.426	ARL8B,BHLHE40,CACNA1D,CDHR1,CHGB,DDN,EGFR,EP300,ERC2,HOMER2,KCNIP4,KCNJ11,MAPT,MINAR1,NOTCH1,NR4A2,OPRK1,PITPNM2,SLC10A4,SLITRK1,SORCS3,SYNJ2,TBR1,UCHL1
GALNT6	enzyme	0.014	0.426	DPP4,EPHB2,FN1
RAP1A	enzyme	0.019	0.426	CDKN1A,THBS1
DNM1	enzyme	0.019	0.426	RIMS1,SLC24A2
IHH	enzyme	0.0263	0.426	CCDC85A,COL9A2,ENO1,MRC1,POSTN,SLC26A2,SPATA24,TMEM67
HMOX1	enzyme	0.027	0.426	CDKN1A,DGCR8,MAP1LC3B,MAPT,MRC1,NR4A2,RELN,SELE,TEK,THBS1
OGA	enzyme	0.029	0.426	ACO2,ADRM1,CACNA2D3,CAMK1D,CD302,CD47,CDKN1A,FGF17,FN1,GABRA2,GTF2IRD1,GTF3A,MYO10,NDUFA13,NDUFA4,NDUFA6,NGEF,PFKM,PIAS3,SERPINE2,THBS1,TIMP2,TUBA1A,USF2
DDX5	enzyme	0.0325	0.426	CDKN1A,MDH1,NDUFA4,NDUFA6,NDUFB1,WNT5A
ERCC4	enzyme	0.0338	0.426	EP300,FN1
RHOC	enzyme	0.0338	0.426	CDKN1A,NAT8L
GSTO1	enzyme	0.0347	0.426	DUSP6,LAMA5,NR4A2,OAS3,SEL1L3,THBS1
DNM3	enzyme	0.0375	0.426	RIMS1
MARCHF6	enzyme	0.0375	0.426	DIO2
DPH2	enzyme	0.0375	0.426	EEF2
BFAR	enzyme	0.0375	0.426	TMBIM6
HS2ST1	enzyme	0.0375	0.426	FGF17
RAB22A	enzyme	0.0375	0.426	VGF
DHX8	enzyme	0.0375	0.426	CDKN1A
DNASE1L3	enzyme	0.0375	0.426	CDKN1A
DEGS1	enzyme	0.0375	0.426	EGFR
PNLDC1	enzyme	0.0375	0.426	PIWIL1
B4GALT5	enzyme	0.0375	0.426	NOTCH1
UBE2E1	enzyme	0.0375	0.426	CDKN1A
RUNX1-RUNX1T1	fusion gene/product	0.0106	0.426	AFF3,CDKN1A,DUSP6,MPL,MPO,MUC6,SLC6A4,XYLT1,YTHDF2
EWSR1-FLI1	fusion gene/product	0.0304	0.426	ADM,GPR37,LIMCH1,LOXL1,PDGFRL,POSTN,THBS1
FUS-ERG	fusion gene/product	0.0375	0.426	PIM1
EWSR1-ERG	fusion gene/product	0.0375	0.426	PIM1
CIC-DUX4	fusion gene/product	0.0375	0.426	DUSP6
ZBTB16-RARA	fusion gene/product	0.0375	0.426	DUSP6
ADORA2A	G-protein coupled receptor	0.00615	0.426	ARF3,CKB,CLDN5,EEF2,GABRB3,GPLD1,KLC1,NR4A2,PDCD1,SELE,STK38,TJP1
GPER1	G-protein coupled receptor	0.00833	0.426	BHLHE40,CACNA1D,CDKN1A,ERRFI1,ESR1,NOTCH1,NR4A2
GPBAR1	G-protein coupled receptor	0.0221	0.426	DIO2,GCG,SELE,TJP1
HTR2A	G-protein coupled receptor	0.026	0.426	EGFR,OPRM1
P2RY1	G-protein coupled receptor	0.026	0.426	FN1,SELE
SUCNR1	G-protein coupled receptor	0.0372	0.426	COL4A2,COL5A1,LAMA5
Histone h4	group	0.0105	0.426	CDKN1A,ESR1,KALRN,KDM5B,MPL,NEGR1,OAS3,PREX1,RASGRP1,SELE,SHANK2,TBX1
Adenosine Receptor	group	0.013	0.426	CLDN5,TJP1
Collagen Alpha1	group	0.014	0.426	CDKN1A,EGFR,TIMP2
ROCK	group	0.0153	0.426	CDKN1A,ETS1,FN1,SORT1,THBS1,TJP1
Lefty	group	0.0338	0.426	CDKN1A,ETS1
Flotillin	group	0.0375	0.426	EGFR
RAB4	group	0.0375	0.426	DRD2
Syntaxin	group	0.0375	0.426	SLC6A2
Lysosomal Protease	group	0.0375	0.426	MAP1LC3B
AGT	growth factor	0.00652	0.426	ADAM23,ADM,AEBP1,ANK3,ATN1,BHLHE40,CASP8,CDKN1A,COL4A2,COL5A1,COL6A3,COL8A1,DIO2,EFNA5,EGFR,ERRFI1,ESR1,ETS1,FN1,GABRB3,IMMP2L,LOXL1,LTBP1,MAPT,MGST1,MXD4,NAPSA,NCL,NR4A2,PCDH17,PDCD1,PDGFRL,PI16,PNKD,POSTN,PREX1,PTBP2,RASGRP1,RCAN1,RERE,SELE,SERPINE2,SLC6A2,SPINK1,SPRY2,TEF,THBS1,TJP1,TLN2,TTN
NGF	growth factor	0.0114	0.426	ADM,AGRN,CDKN1A,CHGB,CHRNB4,DRD2,DUSP6,EGFR,ERRFI1,GRIN2A,MACROD1,OPRD1,P2RX2,PPP2R2B,SORT1,TRIO,VGF,WNT5A
VEGFA	growth factor	0.0118	0.426	ABCC1,CD160,CDKN1A,CLDN5,DIABLO,ETS1,FN1,KARS1,ME2,MRPL3,NOTCH1,NR4A2,PDCD1,PIM1,RCAN1,SELE,SLC25A17,TEK,THBS1,TJP1
BDNF	growth factor	0.0175	0.426	AGRN,ALDH7A1,ARVCF,BHLHE40,CDKN1A,DRD2,DUSP6,EEF2,GRIN2A,KLC1,MACROD1,MAPT,NRXN1,RELN,SEMA3E,SPRY2,THBS1,TMBIM6,TRAF3,TUBA1A,VGF
FGF7	growth factor	0.0269	0.426	ADSL,AQP5,CDKN1A,CLCN2,EGFR,NFE2L3,SPRY2
TGFB1	growth factor	0.0287	0.426	ABI2,ADM,ALDH18A1,ASPN,BHLHE40,CAB39,CASP8,CBR3,CDHR1,CDK2AP1,CDKN1A,CHRNA7,CHRNB4,CLCA2,CMTM5,COL4A2,COL5A1,COL6A3,COL8A1,CX3CL1,EGFR,ENO1,EPHB2,ERCC5,ETS1,FN1,FPR2,GABRG1,GEM,GRIN2A,HEXB,HMGN2,HRH2,HSP90AA1,IFIH1,IL17RB,IL31,ITGB6,JUND,KCNK1,KDM5B,LOC102724788/PRODH,LOXL1,LTBP1,MAPK3,MARCHF7,MARK3,ME2,MPHOSPH9,MPRIP,MRC1,MRTFA,MXD4,MYO10,NEGR1,NOTCH1,NR4A2,NUCB2,P2RX6,PDCD1,PDE4A,PDLIM7,PFKM,PI…
CLCA2	ion channel	0.00896	0.426	CASP8,CDKN1A,FN1
GRIN3A	ion channel	0.0276	0.426	CADM2,CAMK1D,CNTNAP4,CPNE5,CXXC4,KCNH5,SLC4A10,SLITRK1,TRIQK
ANO1	ion channel	0.0338	0.426	EGFR,NOTCH1
FXYD1	ion channel	0.0375	0.426	CDKN1A
SCN10A	ion channel	0.0375	0.426	SCN5A
Trpc2	ion channel	0.0375	0.426	TSHR
KDR	kinase	0.0079	0.426	MESD,NOTCH1,PDCD1,PIM1,SELE,TJP1
DLG3	kinase	0.00801	0.426	EPHB2,GRIN2A
EPHA2	kinase	0.0173	0.426	EGFR,MAPK3,SELE,TJP1
ERN1	kinase	0.0218	0.426	ETS1,FKBP11,FN1,GP1BB,ITGB6,MAP1LC3B,MORF4L2,SEL1L,TBCB,TMED3,UBE2J1
ROCK1	kinase	0.0221	0.426	COL4A2,COL5A1,COL8A1,ETS1
EGFR	kinase	0.025	0.426	CD47,CDKN1A,COL8A1,CXCL14,EGFR,ESR1,FKBP11,HDC,HIRA,ITGB6,JUND,KIRREL1,MPPE1,NCL,NOTCH1,NSF,NUTF2,POSTN,RANBP1,RHEBL1,SERPINE2,SLC26A2,SPRY2,TCOF1,THBS1,TRMT2A,WNT10B,XRN2
BRD4	kinase	0.0271	0.426	BHLHE40,COL5A1,FKBP11,FN1,LOXL1,PIM1,SELE,THBS1,TTC27,WNT5A,ZNF485
PRKG1	kinase	0.0307	0.426	CDKN1A,FN1,MPO,THBS1
TEK	kinase	0.0325	0.426	CDKN1A,CLDN5,TJP1
STK11	kinase	0.0355	0.426	ADSL,AHCY,CDKN1A,CHGB,CPS1,DIABLO,ENO1,FN1,HIRA,NDUFA13,NDUFA4,NRCAM,PALM2AKAP2,PDCD1,PDGFRL,RASGRP1,RRM1,WNT5A
PRKAA2	kinase	0.0366	0.426	CD302,CDKN1A,CHGB,EP300,FN1,IL17RB,LMO4,MGST1,PPP1R3B,SOS1
HASPIN	kinase	0.0375	0.426	CDKN1A
ACVR2B	kinase	0.0375	0.426	CDKN1A
GAK	kinase	0.0375	0.426	EGFR
AHR	ligand-dependent nuclear receptor	0.0228	0.426	ADM,ASPN,CASP8,CBR3,CDKN1A,CERS5,CLCA1,COL4A2,COL5A1,COL6A3,CTRL,DUSP6,ENO1,ESR1,FBN2,FMO2,FN1,HSP90AA1,ITGB6,LAMA5,LTBP1,NOTCH1,OPA1,PMM1,POMP,RASGRP1,THBS1,TIMP2
NR3C1	ligand-dependent nuclear receptor	0.0291	0.426	ADM,AIFM3,AQP5,ARHGEF3,BHLHE40,CACNA2D3,CD47,CDKN1A,CLDN5,COL5A1,COMT,CPS1,DIABLO,DNAJC15,DPP4,DPP7,ERRFI1,FN1,GEM,GRIN2A,IFIH1,ITGB6,JUND,LMO4,MAPK3,NRXN1,PRPH,RERE,RICTOR,SELE,SH3GLB1,SLC43A1,ST3GAL3,TADA3,THBS1,TNFAIP2,TRAF3,WNT5A,ZFYVE28
miR-330-5p (and other miRNAs w/seed CUCUGGG)	mature microRNA	0.00801	0.426	CD47,ETS1
miR-19b-3p (and other miRNAs w/seed GUGCAAA)	mature microRNA	0.00983	0.426	AQP5,ESR1,NR4A2,THBS1
miR-18a-5p (and other miRNAs w/seed AAGGUGC)	mature microRNA	0.0115	0.426	CDKN1A,ESR1,PIAS3,THBS1
miR-1-3p (and other miRNAs w/seed GGAAUGU)	mature microRNA	0.0143	0.426	AGRN,ARF3,EGFR,ESR1,GAK,GNPDA2,IP6K2,MXD4,PDLIM7,PREX1,PTBP2,SLC25A1,THBS1,XPNPEP3
miR-96-5p (and other miRNAs w/seed UUGGCAC)	mature microRNA	0.017	0.426	AQP5,FN1,SERPINE2
miR-132-3p (and other miRNAs w/seed AACAGUC)	mature microRNA	0.017	0.426	EP300,GRIN2A,TJP1
miR-340-5p (miRNAs w/seed UAUAAAG)	mature microRNA	0.019	0.426	LTBP1,POSTN
miR-23a-3p (and other miRNAs w/seed UCACAUU)	mature microRNA	0.0276	0.426	NOTCH1,PFKM,POU4F2,SELE
let-7a-5p (and other miRNAs w/seed GAGGUAG)	mature microRNA	0.0362	0.426	BCL7A,CHRNA7,COL4A2,COL5A1,COL8A1,DHX57,FN1,GAK,IGF2BP1,MRM1,SLC25A1,THBS1,WNT1
miR-523-3p (miRNAs w/seed AACGCGC)	mature microRNA	0.0375	0.426	CDKN1A
miR-409-3p (miRNAs w/seed AAUGUUG)	mature microRNA	0.0375	0.426	LMO4
miR-542-5p (miRNAs w/seed CGGGGAU)	mature microRNA	0.0375	0.426	EGFR
miR-502-5p (and other miRNAs w/seed UCCUUGC)	mature microRNA	0.0375	0.426	KMT5A
miR-24-1-5p (and other miRNAs w/seed GCCUACU)	mature microRNA	0.0375	0.426	SLITRK1
miR-23a-5p (and other miRNAs w/seed GGGUUCC)	mature microRNA	0.0375	0.426	LOC102724788/PRODH
miR-350 (and other miRNAs w/seed UCACAAA)	mature microRNA	0.0375	0.426	SPRY2
mir-326	microRNA	0.00517	0.426	CD47,ETS1,NOTCH1
mir-874	microRNA	0.0375	0.426	CASP8
mir-345	microRNA	0.0375	0.426	ABCC1
mir-654	microRNA	0.0375	0.426	PTPRN2
mir-625	microRNA	0.0375	0.426	IGF2BP1
LMNA	other	0.00485	0.426	ASPN,CAMK1D,COL8A1,EDC4,ERCC5,FN1,HTRA3,IFIH1,JUND,MXD4,PCDH7,RBMS1,RFWD3,RICTOR,RPS21,TIMP2,TTC27,YTHDF2,ZNF613
DLX6-AS1	other	0.00691	0.426	CDKN1A,DLX6,NOTCH1
DGCR5	other	0.00691	0.426	EGFR,FN1,TJP1
DSCAM	other	0.00931	0.426	CARF,MAPT,NGEF,NPAS3,NRCAM,PCDH17,SEMA3E,SHANK2,VGF
TSPYL5	other	0.00983	0.426	ASB3/GPR75-ASB3,CNTNAP2,NRXN1,PTBP2
TPPP2	other	0.013	0.426	CDKN1A,RCAN1
INSL5	other	0.013	0.426	ENO1,PFKM
Cox5b/Gm34962	other	0.013	0.426	CAPN6,POSTN
WNT3	other	0.014	0.426	CDKN1A,POSTN,WNT3
COLQ	other	0.0146	0.426	AGRN,ASPN,COL4A2,COL6A3,COL8A1,FN1,LTBP1
CD9	other	0.0152	0.426	DPP4,TJP1,WNT1,WNT5A
SAMMSON	other	0.018	0.426	MRPL3,MRPL40,NDUFA4,NDUFA6,NDUFB1
EGFL7	other	0.019	0.426	NOTCH1,SELE
HOMER2	other	0.019	0.426	GRIN2A,HOMER2
BAMBI	other	0.019	0.426	OPRD1,OPRM1
PAXIP1	other	0.019	0.426	CDKN1A,GCG
CXXC4	other	0.019	0.426	CDKN1A,EPHB2
H3-3A/H3-3B	other	0.0204	0.426	CDKN1A,EGFR,MPL
RBM20	other	0.0238	0.426	EEF2,KLC1,NEB,RBFOX1,SCN5A,TDRD3,TNRC6A,TTN,XRN2
POSTN	other	0.0238	0.426	CLCA1,EGFR,FN1,LOXL1,NOTCH1
BLOC1S5	other	0.0241	0.426	DRD2,GRIN2A,VAMP7
NOP2	other	0.0241	0.426	CDKN1A,MAP1LC3B,SESN2
GAL	other	0.0241	0.426	CDKN1A,GCG,SORT1
RASSF1	other	0.0248	0.426	BHLHE40,CDKN1A,COL4A2,EGFR,ESR1,PCDH7,PIWIL1,RASGEF1A
4732491K20Rik	other	0.026	0.426	MAP3K4,SELE
AGR2	other	0.026	0.426	CDX2,EGFR
BANCR	other	0.026	0.426	CDKN1A,TSHR
SPTBN4	other	0.026	0.426	ANK3,KCNJ11
TMPO	other	0.026	0.426	ASPN,TIMP2
RAPGEF4	other	0.026	0.426	CDKN1A,THBS1
Eda	other	0.026	0.426	EGFR,WNT10B
NFASC	other	0.0281	0.426	ANK3,KLC1,NRCAM
S100A4	other	0.0282	0.426	CDKN1A,FN1,THBS1,TIMP2,TJP1
ANKS6	other	0.0338	0.426	FN1,ITGB6
BANP	other	0.0338	0.426	CDKN1A,TUBGCP5
MTBP	other	0.0338	0.426	CDKN1A,NCL
FERMT1	other	0.0338	0.426	WNT1,WNT5A
DIABLO	other	0.0338	0.426	CDKN1A,PDCD1
NPY	other	0.0347	0.426	ALDH18A1,DIO2,DPP4,HCN1,NUDT12,RCAN1
MSI2	other	0.0372	0.426	CDKN1A,CLDN5,FN1
KCNIP4-IT1	other	0.0375	0.426	KCNIP4
HCG11	other	0.0375	0.426	CDKN1A
LINC00475	other	0.0375	0.426	CDKN1A
TNS4	other	0.0375	0.426	EGFR
DNAJC24	other	0.0375	0.426	EEF2
ARMC10	other	0.0375	0.426	CDKN1A
FKBPL	other	0.0375	0.426	CDKN1A
VPS36	other	0.0375	0.426	ESR1
STOML2	other	0.0375	0.426	OPA1
CLDN9	other	0.0375	0.426	TJP1
TBC1D16	other	0.0375	0.426	EGFR
CHMP6	other	0.0375	0.426	EGFR
SCYL2	other	0.0375	0.426	WNT5A
LY6H	other	0.0375	0.426	MAPT
CAMSAP2	other	0.0375	0.426	TJP1
TRI-AAT9-1	other	0.0375	0.426	EGFR
TMPO-AS1	other	0.0375	0.426	ESR1
CABLES1	other	0.0375	0.426	CDKN1A
CDT1	other	0.0375	0.426	CDKN1A
HNRNPM	other	0.0375	0.426	WNT5A
Fbxl20	other	0.0375	0.426	RIMS1
LY6D	other	0.0375	0.426	GFUS
Neat1	other	0.0375	0.426	CDX2
CCNI	other	0.0375	0.426	CDKN1A
MAG	other	0.0375	0.426	RTN4R
CALML3	other	0.0375	0.426	MYO10
POLDIP2	other	0.0375	0.426	POLD1
VPS25	other	0.0375	0.426	EGFR
Uchl1os	other	0.0375	0.426	UCHL1
ING3	other	0.0375	0.426	CDKN1A
ARAP1	other	0.0375	0.426	EGFR
ETS1-AS1	other	0.0375	0.426	ETS1
CUL9	other	0.0375	0.426	CDKN1A
Fbxo38	other	0.0375	0.426	PDCD1
PRR13	other	0.0375	0.426	THBS1
Gm26507	other	0.0375	0.426	FBN2
AC092580.4	other	0.0375	0.426	PDCD1
MMP9	peptidase	0.00453	0.426	ADAM23,CDKN1A,CLDN5,DLC1,EGFR,FOXP1,PIM1,SERPINE2,THBS1,TJP1,XRCC6
MMP2	peptidase	0.00544	0.426	ABCG8,ACO2,CDKN1A,CLDN5,CX3CL1,EGFR,FN1,TJP1
HPN	peptidase	0.0113	0.426	FN1,LTBP1,TBX1
LGMN	peptidase	0.013	0.426	EGFR,MAPT
CPXM1	peptidase	0.019	0.426	COL4A2,COL5A1
ADAM19	peptidase	0.019	0.426	FN1,NOTCH1
ADAM12	peptidase	0.0222	0.426	AEBP1,COL4A2,COL6A3,CX3CL1,EGFR,LAMA5,SERPINE2
PROC	peptidase	0.0332	0.426	MPO,SELE,TEK,THBS1,TJP1
BRINP1	peptidase	0.0375	0.426	ESR1
AFG3L2	peptidase	0.0375	0.426	OPA1
PPP2R5E	phosphatase	0.0375	0.426	FN1
PPP1R3A	phosphatase	0.0375	0.426	THBS1
TEAD1	transcription regulator	0.00544	0.426	ADM,CDKN1A,GPR37,LIMCH1,LOXL1,PDGFRL,POSTN,THBS1
NEUROD1	transcription regulator	0.00697	0.426	CDKN1A,JUND,KCNJ11,NKX2-2,PDE6B,PRPH,RANGAP1
TBR1	transcription regulator	0.00801	0.426	NR4A2,RELN
DAXX	transcription regulator	0.00826	0.426	CASP8,CDKN1A,IFIH1,TANK,TRAF3
BCL11A	transcription regulator	0.00896	0.426	EGFR,ESR1,TBR1
PAWR	transcription regulator	0.00896	0.426	CDKN1A,DIABLO,MAPK3
SIX2	transcription regulator	0.00907	0.426	CACNA1D,CAMK1D,CDC45,CDKN1A,CHGB,ICA1,PTPRN2
ERG	transcription regulator	0.0124	0.426	CAMK1D,CHRNB4,DBN1,ETS1,FMNL3,GAK,LAMA5,MPL,MYO10,NR4A2,NRCAM,PIM1,PLEK,RBMS1,THBS1,WNT1
PITX2	transcription regulator	0.0128	0.426	COL8A1,FMO2,HCN4,KCNJ11,KCTD20,NDUFA13,OGFOD2,OXNAD1,TBX1,TRIO,WNT5A
FEZF2	transcription regulator	0.013	0.426	POU4F2,TBR1
FHL2	transcription regulator	0.014	0.426	CLDN5,FHL2,MPO,TJP1,WNT10B,WNT5A
FOXP1	transcription regulator	0.0163	0.426	CDKN1A,CNTN6,NLGN3,NXPH1,WNT1
FEV	transcription regulator	0.0163	0.426	CHGB,EFNA5,GABPB1,KCTD20,MCHR1,NLGN3,SEMA3E,SLC6A4
TCF12	transcription regulator	0.0164	0.426	CDKN1A,ESR1,ETS1,FLT3,FN1,IL31,LMO4,NOTCH1,PTPRU,VGF,XRCC6
CREB1	transcription regulator	0.0183	0.426	ADM,BHLHE40,CADPS2,CALN1,CAMK1D,CCDC85A,CDKN1A,CHGB,CPEB1,DIO2,ERC2,ERRFI1,FN1,GEM,GPR63,IGSF10,MRC1,NDUFA4,NEO1,NOTCH1,NR4A2,OPRM1,OXNAD1,PAM,PCDH11X,RUNX1T1,SERINC2,SORCS3,SYNJ2,TSHR,VGF,YPEL4
BRCA1	transcription regulator	0.0184	0.426	AQP5,CDKN1A,EGFR,EP300,ERCC5,ESR1,FHIT,FHL2,GTF2H1,NOTCH1,SERPINE2,TNFAIP2,XRCC6
PHOX2A	transcription regulator	0.019	0.426	PHOX2B,SLC6A2
TAF6	transcription regulator	0.0196	0.426	ACTR8,CDKN1A,SRSF3,SRSF4
HOXA9	transcription regulator	0.0199	0.426	BCL7A,FLT3,FPR2,HIRA,HMGN2,KIF20B,NEB,PIM1,PPP1R16B,SELE,SERINC2,ST13,WNT10B
NDN	transcription regulator	0.0204	0.426	CDKN1A,NUCB2,WNT10B
WT1	transcription regulator	0.0205	0.426	AHCY,AMH,CDC45,CDKN1A,CX3CL1,DESI1,EGFR,ESR1,ETS1,IL31,JUND,MGST1,NR4A2,POU4F2,SOS1,TCOF1,THBS1
SPDEF	transcription regulator	0.0222	0.426	CDKN1A,CLCA1,COL4A2,COL5A1,COL6A3,EGFR,WNT5A
MECP2	transcription regulator	0.0252	0.426	ASH1L,CAMK1D,DLX6,DPP4,EFNA5,ESR1,GABRA2,GABRB3,GRIN2A,PIKFYVE,RELN,SELENOK,SLC6A2
ZNF217	transcription regulator	0.0253	0.426	ADM,ANK3,COL8A1,CXXC4,DPP6,LMO3,RCAN1
CC2D1A	transcription regulator	0.026	0.426	DRD2,SENP1
EOMES	transcription regulator	0.0276	0.426	ADM,CHRNA7,COL6A3,DNAJC15,FGF17,PDCD1,PREX1,TBR1,WNT3
TAF4	transcription regulator	0.0277	0.426	COL6A3,DRD2,EGFR,ETS1,GTF2A1,MAP3K6,THBS1,WWC1
NOSTRIN	transcription regulator	0.0307	0.426	FN1,SELE,TEK,THBS1
TFEC	transcription regulator	0.0325	0.426	BBX,BCL11A,COL6A3
CCNH	transcription regulator	0.0325	0.426	CDKN1A,CDX2,TENM2
HCFC1	transcription regulator	0.0338	0.426	KMT5A,RRM1
NFE2L3	transcription regulator	0.0338	0.426	CDKN1A,POMP
TERF2	transcription regulator	0.0338	0.426	CDKN1A,HS3ST4
OTX2	transcription regulator	0.0347	0.426	COL8A1,EFNA5,NKX2-2,PDE6B,SLC39A12,WNT1
TWIST2	transcription regulator	0.0359	0.426	BCL11A,CDKN1A,DUSP6,FN1,POSTN
ASB9	transcription regulator	0.0375	0.426	CKB
ZBTB7C	transcription regulator	0.0375	0.426	CDKN1A
NPAS1	transcription regulator	0.0375	0.426	RELN
EBF4	transcription regulator	0.0375	0.426	CDKN1A
CXXC1	transcription regulator	0.0375	0.426	CDKN1A
ETV2	transcription regulator	0.0375	0.426	TEK
ZBTB8A	transcription regulator	0.0375	0.426	CDKN1A
ZNF606	transcription regulator	0.0375	0.426	CX3CL1
ZBTB5	transcription regulator	0.0375	0.426	CDKN1A
MYT1L	transcription regulator	0.0375	0.426	RBFOX1
ZBTB1	transcription regulator	0.0375	0.426	CXCL14
NKX6-2	transcription regulator	0.0375	0.426	GCG
JADE1	transcription regulator	0.0375	0.426	CDKN1A
SCML2	transcription regulator	0.0375	0.426	CDKN1A
CELF1	translation regulator	0.00691	0.426	CDKN1A,FHL2,RCAN1
IGF2BP1	translation regulator	0.00826	0.426	BCL11A,CDKN1A,COL5A1,COL6A3,WNT3
Bc1-ps1	translation regulator	0.0375	0.426	DRD2
FAS	transmembrane receptor	0.00852	0.426	AKAP9,BCL11A,CASP8,CDKN1A,COL4A2,COL5A1,COL6A3,COL8A1,DGCR2,FPR1,GPLD1,JUND,LY75,NR4A2,PALM2AKAP2,PDLIM7,PKN2,PTPRN2,SPINK1,STK38,TLK1,TLN2,TRAF3,VRK2
NCR2	transmembrane receptor	0.0281	0.426	NR4A2,RCAN1,THBS1
CR1L	transmembrane receptor	0.0339	0.426	COL4A2,COL5A1,COL6A3,COL8A1
NRXN1	transporter	0.0339	0.426	CD47,CTNNA3,NPTN,THBS1
PACSIN2	transporter	0.0375	0.426	EGFR
XPO7	transporter	0.0375	0.426	CDKN1A
KLF1	transcription regulator	0.0387	0.438	BCL11A,CDKN1A,EPB41,IL17RB,SLC43A1
Go 6976	chemical drug	0.0394	0.443	ABCA7,CDKN1A,CHGB,ETS1,FN1,NR4A2
CIP2A	other	0.0394	0.443	COL8A1,GPR37,NCL,PDLIM7,SERPINE2,ZDHHC11
BMI1	transcription regulator	0.0394	0.443	CASP8,CDKN1A,DLC1,RRM1,USF2,WNT10B
indican	chemical - endogenous mammalian	0.0409	0.454	CDKN1A,SELE,SLCO4C1,THBS1
cholesterol sulfate	chemical - endogenous mammalian	0.0424	0.454	FLG,JUND
trovafloxacin	chemical drug	0.0419	0.454	BHLHE40,CDKN1A,EGFR,ERRFI1,SELE,THBS1
PD 169316	chemical drug	0.0422	0.454	CDKN1A,FN1,SLC6A2
lithium	chemical drug	0.0425	0.454	ADCY2,ANK3,CASP8,CDKN1A,CRHR1,GCG,SLC6A4
SF-3-030	chemical reagent	0.0424	0.454	COL5A1,MAP3K4
MI-503	chemical reagent	0.0424	0.454	ADM,FLT3
acrylamide	chemical toxicant	0.0424	0.454	EGFR,OPRK1
EDA	cytokine	0.0424	0.454	EGFR,WNT10B
RND3	enzyme	0.0422	0.454	CDKN1A,FN1,NOTCH1
PAK1	kinase	0.0409	0.454	CDKN1A,FN1,GCG,PFKM
PLK1	kinase	0.0416	0.454	CDKN1A,EGFR,ESR1,PLA2R1,THBS1
CPEB4	other	0.0424	0.454	RBFOX1,ZBTB20
AGRN	other	0.0424	0.454	AGRN,MAPT
HGS	other	0.0424	0.454	EGFR,ESR1
PTP4A3	phosphatase	0.0422	0.454	FN1,HSP90AA1,TERF2IP
HOXA11	transcription regulator	0.0422	0.454	CD47,EGFR,NRCAM
SPZ1	transcription regulator	0.0422	0.454	FN1,MAPK3,WNT5A
SIM2	transcription regulator	0.0422	0.454	DBN1,ROBO3,TIMP2
DLX2	transcription regulator	0.0422	0.454	CDKN1A,DLX6,WNT1
ZBED2	transcription regulator	0.0424	0.454	OAS3,PIM1
RBFOX2	transcription regulator	0.0424	0.454	PTBP2,SRSF7
KAT2A	enzyme	0.0438	0.467	ADAM23,ANK3,BCL11A,EFNA5,HSP90AA1,POU4F3,RANBP1,RELN,SLITRK1
mir-23	microRNA	0.0447	0.475	HOXB4,LOC102724788/PRODH,PFKM,SPRY2
TAL1	transcription regulator	0.0448	0.475	ARVCF,CDH23,CDKN1A,ETS1,MAP3K4,MPO,MUC16,NOTCH1,PTPRU,SPRY2,TRAF3,TSHR,XRCC6,ZNF74
trichostatin A	chemical drug	0.0454	0.48	ABCC1,AGRN,ALDH7A1,BCL11A,CDKN1A,CNTNAP2,COL6A3,DLC1,DRD2,EGFR,ESR1,FN1,GCG,IGF2BP1,JUND,KIDINS220,LTBP1,MAP1LC3B,MGST1,MRC1,MRTFA,NOTCH1,NR4A2,NRXN1,NSD1,NSD3,OLFM1,OPRK1,OPRM1,PIM1,POU4F2,PREX1,PTBP2,RBX1,RELN,SELE,SERPINE2,SLC26A2,SLC43A1,SLC6A4,THBS1,TIMP2,TNFAIP2,TRAF3,UCHL1,USF2,WNT3,WNT5A
mezerein	chemical - endogenous non-mammalian	0.0476	0.481	CDKN1A,FN1,IFIH1
sodium arsenite	chemical drug	0.0472	0.481	ABCC1,AHCY,CDKN1A,ENO1,ESR1,SRSF3
V-PYRRO/NO	chemical reagent	0.0476	0.481	CASP8,THBS1,TRAF3
bromobenzene	chemical toxicant	0.0472	0.481	ABCC1,CDKN1A,HSP90AA1,JUND,MPRIP,TUBA1A
IL4	cytokine	0.0492	0.481	ABCA2,ADRM1,BBX,BCL11A,BHLHE40,CAMK1D,CD276,CDKN1A,CKB,CLDN5,COL6A3,CX3CL1,DPP4,EFL1,FN1,FPR1,FPR2,GFM2,GPLD1,HDC,HOMER2,IFIH1,IL17RB,IL31,JUND,KCNK1,KIDINS220,LMAN2,LRPPRC,LY75,MAPK3,MPHOSPH9,MRC1,NCL,OAS3,OPRM1,PDCD1,PIM1,POLG,POSTN,PREPL,PREX1,PRKAG1,PRMT1,PRR7,PTBP2,SELE,SH3BP2,SLC23A1,SPINK1,SPINK5,ST3GAL3,TIMP2,TLN2,TNIK,TNIP2,TRAF3,XRCC6
Hsp90	group	0.0496	0.481	ABCC1,EGFR,ESR1,FN1,KCNJ11,SLC6A4,TSSK2
CDK4/6	group	0.05	0.481	CDC45,ENO1,ERRFI1,PKP4,TUBA1B,TUBA1C
PRKAR1A	kinase	0.0487	0.481	DESI1,EGFR,NR4A2,PIAS3
miR-155-5p (miRNAs w/seed UAAUGCU)	mature microRNA	0.0485	0.481	ABHD16A,BRPF3,CD47,DPP7,EGFR,ETS1,MYO10,PKN2,SNAP29,TM6SF1,UBE2J1
PARPBP	other	0.0476	0.481	CNTNAP2,COL8A1,EMB
ITGA11	other	0.0476	0.481	COL8A1,FN1,THBS1
DOT1L	phosphatase	0.0476	0.481	AQP5,LMO4,TUBA1C
BCOR	transcription regulator	0.0479	0.481	ADM,BCL7A,CDKN1A,DLX6,LMO4
EIF4G2	translation regulator	0.0476	0.481	CDKN1A,SERPINE2,SOS1
IL7R	transmembrane receptor	0.0472	0.481	DPP4,EPHB2,FHL2,PCDHB13,PIM1,SELE,VPS13A
