# Supplementary material for: Molecular Landscape of Tourette’s Disorder
Source: Int J Mol Sci. 2023 Jan 11;24(2):1428. doi: 10.3390/ijms24021428 (PMC9865021; doi:10.3390/ijms24021428)
Supplement: Supplementary file 1 [file ijms-24-01428-s001.zip › supplementary Table S4.xlsx]

## Sheet: Legend
Table S4-a. Results of the PRS-based analyses between TD and the blood levels of 993 biochemical traits (metabolites, cytokines, metals).
The table presents results from the PRS-based analyses performed in PRSice between TD (base sample) and the blood levels of 993 biochemical traits (metabolites, cytokines, metals) (target sample). Superpathway and pathway annotations are given for metabolites with known chemical identity. Metabolites were classified as ‘Unknown’ if their chemical identity was not yet determined at the time of ana…
Table S4-b. Results of the PRS-based analyses between TD and the CSF levels of 338 biochemical traits (metabolites).
The table presents results from the PRS-based analyses performed in PRSice between TD (base sample) and the CSF levels of 338 biochemical traits (metabolites) (target sample). Superpathway and pathway annotations are given for metabolites with known chemical identity. Metabolites were classified as ‘Unknown’ if their chemical identity was not yet determined at the time of analysis. * indicates me…

## Sheet: Table S4-a
order		Biochemical name	Abbreviation	Thresh	P-value	R2	N SNPs	ID_PRS-based analyses	Superpathway	Pathway	GWAS	N GWAS	HMDB	Rank	FDR P-value	FDR 0.05	FDR 0.01	Bonferroni 0.05
1	CE16_0_imputed_complete_CHARGE.csv_TS_Oct2018.so_RAW.txt	CE 16:0	CE 16:0	0.001	0.217464	0.000339189	942	normres_CE16_0_imputed_complete_CHARGE.csv	Lipid	Cholesterol Ester	Rhee	1797	HMDB0000885	4577	0.330259	No	No	No
2		CE 16:0	CE 16:0	0.05	0.0105472	0.00295554	25643	normres_CE16_0_imputed_complete_CHARGE.csv	Lipid	Cholesterol Ester	Rhee	1797	HMDB0000885	1435	0.0510896	No	No	No
3		CE 16:0	CE 16:0	0.1	0.00573738	0.00354976	45471	normres_CE16_0_imputed_complete_CHARGE.csv	Lipid	Cholesterol Ester	Rhee	1797	HMDB0000885	1168	0.0341443	Yes	No	No
4		CE 16:0	CE 16:0	0.2	0.00123984	0.00508194	79790	normres_CE16_0_imputed_complete_CHARGE.csv	Lipid	Cholesterol Ester	Rhee	1797	HMDB0000885	710	0.0121382	Yes	No	No
5		CE 16:0	CE 16:0	0.3	0.000840775	0.00547646	109794	normres_CE16_0_imputed_complete_CHARGE.csv	Lipid	Cholesterol Ester	Rhee	1797	HMDB0000885	635	0.00920351	Yes	Yes	No
6		CE 16:0	CE 16:0	0.4	0.000782545	0.00554958	136596	normres_CE16_0_imputed_complete_CHARGE.csv	Lipid	Cholesterol Ester	Rhee	1797	HMDB0000885	619	0.00878751	Yes	Yes	No
7		CE 16:0	CE 16:0	0.5	0.000525851	0.00595563	160355	normres_CE16_0_imputed_complete_CHARGE.csv	Lipid	Cholesterol Ester	Rhee	1797	HMDB0000885	532	0.00687066	Yes	Yes	No
8	M35669	tetradecanedioate	tetradecanedioate	0.001	0.246742	8.33009e-05	855	M35669.metal.pos.txt	Lipid	Fatty Acid, Dicarboxylate	Shin	5629	HMDB0000872	4835	0.354727	No	No	No
9		tetradecanedioate	tetradecanedioate	0.05	0.00271389	0.0013725	22451	M35669.metal.pos.txt	Lipid	Fatty Acid, Dicarboxylate	Shin	5629	HMDB0000872	929	0.0203059	Yes	No	No
10		tetradecanedioate	tetradecanedioate	0.1	0.00108293	0.00166913	39507	M35669.metal.pos.txt	Lipid	Fatty Acid, Dicarboxylate	Shin	5629	HMDB0000872	680	0.0110698	Yes	No	No
11		tetradecanedioate	tetradecanedioate	0.2	0.00146731	0.00157057	68495	M35669.metal.pos.txt	Lipid	Fatty Acid, Dicarboxylate	Shin	5629	HMDB0000872	755	0.013509	Yes	No	No
12		tetradecanedioate	tetradecanedioate	0.3	0.00141434	0.00158247	93665	M35669.metal.pos.txt	Lipid	Fatty Acid, Dicarboxylate	Shin	5629	HMDB0000872	744	0.0132139	Yes	No	No
13		tetradecanedioate	tetradecanedioate	0.4	0.000720441	0.00180202	115892	M35669.metal.pos.txt	Lipid	Fatty Acid, Dicarboxylate	Shin	5629	HMDB0000872	605	0.00827733	Yes	Yes	No
14		tetradecanedioate	tetradecanedioate	0.5	0.00105592	0.00167734	135306	M35669.metal.pos.txt	Lipid	Fatty Acid, Dicarboxylate	Shin	5629	HMDB0000872	675	0.0108736	Yes	No	No
15	thyroxine	thyroxine	T4	0.001	0.476219	1.9743e-06	942	normres_thyroxine_imputed_complete_CHARGE.csv	Amino acid	Tyrosine Metabolism	Rhee	1802	HMDB0000248	6781	0.488157	No	No	No
16		thyroxine	T4	0.05	0.462123	5.01752e-06	25643	normres_thyroxine_imputed_complete_CHARGE.csv	Amino acid	Tyrosine Metabolism	Rhee	1802	HMDB0000248	6681	0.480799	No	No	No
17		thyroxine	T4	0.1	0.376935	5.45534e-05	45471	normres_thyroxine_imputed_complete_CHARGE.csv	Amino acid	Tyrosine Metabolism	Rhee	1802	HMDB0000248	5985	0.437774	No	No	No
18		thyroxine	T4	0.2	0.436937	1.39832e-05	79790	normres_thyroxine_imputed_complete_CHARGE.csv	Amino acid	Tyrosine Metabolism	Rhee	1802	HMDB0000248	6475	0.469058	No	No	No
19		thyroxine	T4	0.3	0.275307	0.00019766	109794	normres_thyroxine_imputed_complete_CHARGE.csv	Amino acid	Tyrosine Metabolism	Rhee	1802	HMDB0000248	5096	0.375521	No	No	No
20		thyroxine	T4	0.4	0.2942	0.000162501	136596	normres_thyroxine_imputed_complete_CHARGE.csv	Amino acid	Tyrosine Metabolism	Rhee	1802	HMDB0000248	5269	0.388116	No	No	No
21		thyroxine	T4	0.5	0.232191	0.000297021	160355	normres_thyroxine_imputed_complete_CHARGE.csv	Amino acid	Tyrosine Metabolism	Rhee	1802	HMDB0000248	4720	0.341941	No	No	No
22	M37058	succinylcarnitine	succinylcarnitine	0.001	0.390307	1.18396e-05	856	M37058.metal.pos.txt	Energy	TCA Cycle	Shin	6552	HMDB0061717	6080	0.446221	No	No	No
23		succinylcarnitine	succinylcarnitine	0.05	0.335486	2.75435e-05	22457	M37058.metal.pos.txt	Energy	TCA Cycle	Shin	6552	HMDB0061717	5647	0.412956	No	No	No
24		succinylcarnitine	succinylcarnitine	0.1	0.369993	1.68099e-05	39520	M37058.metal.pos.txt	Energy	TCA Cycle	Shin	6552	HMDB0061717	5926	0.433989	No	No	No
25		succinylcarnitine	succinylcarnitine	0.2	0.306105	3.92192e-05	68522	M37058.metal.pos.txt	Energy	TCA Cycle	Shin	6552	HMDB0061717	5373	0.396005	No	No	No
26		succinylcarnitine	succinylcarnitine	0.3	0.224328	8.76097e-05	93694	M37058.metal.pos.txt	Energy	TCA Cycle	Shin	6552	HMDB0061717	4633	0.336565	No	No	No
27		succinylcarnitine	succinylcarnitine	0.4	0.2978	4.29909e-05	115942	M37058.metal.pos.txt	Energy	TCA Cycle	Shin	6552	HMDB0061717	5303	0.390347	No	No	No
28		succinylcarnitine	succinylcarnitine	0.5	0.441758	3.2763e-06	135368	M37058.metal.pos.txt	Energy	TCA Cycle	Shin	6552	HMDB0061717	6514	0.471394	No	No	No
29	normres_taurine_imputed_complete_CHARGE.csv_TS_Oct2018.so_RAW.txt	taurine	Tau	0.001	0.327308	0.000111054	942	normres_taurine_imputed_complete_CHARGE.csv	Amino acid	Methionine, Cysteine, SAM and Taurine Metabolism	Rhee	1802	HMDB0000251	5560	0.409194	No	No	No
30		taurine	Tau	0.05	0.127363	0.000719609	25643	normres_taurine_imputed_complete_CHARGE.csv	Amino acid	Methionine, Cysteine, SAM and Taurine Metabolism	Rhee	1802	HMDB0000251	3641	0.243147	No	No	No
31		taurine	Tau	0.1	0.356851	7.46966e-05	45471	normres_taurine_imputed_complete_CHARGE.csv	Amino acid	Methionine, Cysteine, SAM and Taurine Metabolism	Rhee	1802	HMDB0000251	5817	0.426417	No	No	No
32		taurine	Tau	0.2	0.460511	5.45499e-06	79790	normres_taurine_imputed_complete_CHARGE.csv	Amino acid	Methionine, Cysteine, SAM and Taurine Metabolism	Rhee	1802	HMDB0000251	6662	0.480488	No	No	No
33		taurine	Tau	0.3	0.477793	1.72126e-06	109794	normres_taurine_imputed_complete_CHARGE.csv	Amino acid	Methionine, Cysteine, SAM and Taurine Metabolism	Rhee	1802	HMDB0000251	6794	0.488834	No	No	No
34		taurine	Tau	0.4	0.312641	0.000132352	136596	normres_taurine_imputed_complete_CHARGE.csv	Amino acid	Methionine, Cysteine, SAM and Taurine Metabolism	Rhee	1802	HMDB0000251	5421	0.400879	No	No	No
35		taurine	Tau	0.5	0.337216	9.79206e-05	160355	normres_taurine_imputed_complete_CHARGE.csv	Amino acid	Methionine, Cysteine, SAM and Taurine Metabolism	Rhee	1802	HMDB0000251	5660	0.414132	No	No	No
36	normres_TAG56_5_PC1_imputed_complete_CHARGE.csv_TS_Oct2018.so_RAW.txt	TAG 56:5	TAG 56:5	0.001	0.0894547	0.00100599	942	normres_TAG56_5_PC1_imputed_complete_CHARGE.csv	Lipid	Triacylglycerol	Rhee	1795	#N/A	3157	0.196959	No	No	No
37		TAG 56:5	TAG 56:5	0.05	0.360653	7.08855e-05	25643	normres_TAG56_5_PC1_imputed_complete_CHARGE.csv	Lipid	Triacylglycerol	Rhee	1795	#N/A	5844	0.42897	No	No	No
38		TAG 56:5	TAG 56:5	0.1	0.247165	0.000260183	45471	normres_TAG56_5_PC1_imputed_complete_CHARGE.csv	Lipid	Triacylglycerol	Rhee	1795	#N/A	4840	0.354967	No	No	No
39		TAG 56:5	TAG 56:5	0.2	0.42531	1.97589e-05	79790	normres_TAG56_5_PC1_imputed_complete_CHARGE.csv	Lipid	Triacylglycerol	Rhee	1795	#N/A	6389	0.462721	No	No	No
40		TAG 56:5	TAG 56:5	0.3	0.251575	0.000249711	109794	normres_TAG56_5_PC1_imputed_complete_CHARGE.csv	Lipid	Triacylglycerol	Rhee	1795	#N/A	4884	0.358046	No	No	No
41		TAG 56:5	TAG 56:5	0.4	0.265372	0.0002189	136596	normres_TAG56_5_PC1_imputed_complete_CHARGE.csv	Lipid	Triacylglycerol	Rhee	1795	#N/A	5007	0.368404	No	No	No
42		TAG 56:5	TAG 56:5	0.5	0.247063	0.000260428	160355	normres_TAG56_5_PC1_imputed_complete_CHARGE.csv	Lipid	Triacylglycerol	Rhee	1795	#N/A	4838	0.354968	No	No	No
43	M34453	X-12776	X-12776	0.001	0.0819731	0.000264752	856	M34453.metal.pos.txt	Unknown	Unknown	Shin	7317	#N/A	3043	0.187248	No	No	No
44		X-12776	X-12776	0.05	0.00767043	0.000802861	22464	M34453.metal.pos.txt	Unknown	Unknown	Shin	7317	#N/A	1287	0.0414275	Yes	No	No
45		X-12776	X-12776	0.1	0.00388236	0.000968091	39529	M34453.metal.pos.txt	Unknown	Unknown	Shin	7317	#N/A	1045	0.0258242	Yes	No	No
46		X-12776	X-12776	0.2	0.0114251	0.000707671	68521	M34453.metal.pos.txt	Unknown	Unknown	Shin	7317	#N/A	1476	0.0538047	No	No	No
47		X-12776	X-12776	0.3	0.00525433	0.000894306	93693	M34453.metal.pos.txt	Unknown	Unknown	Shin	7317	#N/A	1139	0.0320657	Yes	No	No
48		X-12776	X-12776	0.4	0.00745963	0.000809564	115945	M34453.metal.pos.txt	Unknown	Unknown	Shin	7317	#N/A	1281	0.0404777	Yes	No	No
49		X-12776	X-12776	0.5	0.00941658	0.000753705	135380	M34453.metal.pos.txt	Unknown	Unknown	Shin	7317	#N/A	1383	0.047328	Yes	No	No
50	MetaAnalysis_Ser_HetISqLt75_HetDfGt0_HWEPValGt1EMinus6.tsv.fixed_TS_Oct2018.so_RAW.txt	serine	Ser	0.001	0.353796	1.88193e-05	935	MetaAnalysis_Ser_HetISqLt75_HetDfGt0_HWEPValGt1EMinus6.tsv.fixed	Amino acid	Glycine, Serine and Threonine Metabolism	Draaisma	7476	HMDB0000187	5800	0.424006	No	No	No
51		serine	Ser	0.05	0.278237	4.62599e-05	24950	MetaAnalysis_Ser_HetISqLt75_HetDfGt0_HWEPValGt1EMinus6.tsv.fixed	Amino acid	Glycine, Serine and Threonine Metabolism	Draaisma	7476	HMDB0000187	5125	0.377371	No	No	No
52		serine	Ser	0.1	0.374894	1.36047e-05	44041	MetaAnalysis_Ser_HetISqLt75_HetDfGt0_HWEPValGt1EMinus6.tsv.fixed	Amino acid	Glycine, Serine and Threonine Metabolism	Draaisma	7476	HMDB0000187	5973	0.436278	No	No	No
53		serine	Ser	0.2	0.184774	0.000107697	76945	MetaAnalysis_Ser_HetISqLt75_HetDfGt0_HWEPValGt1EMinus6.tsv.fixed	Amino acid	Glycine, Serine and Threonine Metabolism	Draaisma	7476	HMDB0000187	4265	0.301141	No	No	No
54		serine	Ser	0.3	0.116818	0.000189734	105521	MetaAnalysis_Ser_HetISqLt75_HetDfGt0_HWEPValGt1EMinus6.tsv.fixed	Amino acid	Glycine, Serine and Threonine Metabolism	Draaisma	7476	HMDB0000187	3500	0.232001	No	No	No
55		serine	Ser	0.4	0.0399066	0.00041039	130936	MetaAnalysis_Ser_HetISqLt75_HetDfGt0_HWEPValGt1EMinus6.tsv.fixed	Amino acid	Glycine, Serine and Threonine Metabolism	Draaisma	7476	HMDB0000187	2312	0.119979	No	No	No
56		serine	Ser	0.5	0.0319816	0.000458899	153322	MetaAnalysis_Ser_HetISqLt75_HetDfGt0_HWEPValGt1EMinus6.tsv.fixed	Amino acid	Glycine, Serine and Threonine Metabolism	Draaisma	7476	HMDB0000187	2092	0.106264	No	No	No
57	M33131	X-11786--methylcysteine	X-11786--methylcysteine	0.001	0.0839861	0.000685286	856	M33131.metal.pos.txt	Amino acid	Methionine, Cysteine, SAM and Taurine Metabolism	Shin	2773	#N/A	3077	0.189726	No	No	No
58		X-11786--methylcysteine	X-11786--methylcysteine	0.05	0.0344833	0.00119202	22466	M33131.metal.pos.txt	Amino acid	Methionine, Cysteine, SAM and Taurine Metabolism	Shin	2773	#N/A	2160	0.110969	No	No	No
59		X-11786--methylcysteine	X-11786--methylcysteine	0.1	0.0310693	0.00125394	39530	M33131.metal.pos.txt	Amino acid	Methionine, Cysteine, SAM and Taurine Metabolism	Shin	2773	#N/A	2072	0.104229	No	No	No
60		X-11786--methylcysteine	X-11786--methylcysteine	0.2	0.0270709	0.0013364	68523	M33131.metal.pos.txt	Amino acid	Methionine, Cysteine, SAM and Taurine Metabolism	Shin	2773	#N/A	1973	0.0953726	No	No	No
61		X-11786--methylcysteine	X-11786--methylcysteine	0.3	0.012219	0.00182425	93697	M33131.metal.pos.txt	Amino acid	Methionine, Cysteine, SAM and Taurine Metabolism	Shin	2773	#N/A	1512	0.0561736	No	No	No
62		X-11786--methylcysteine	X-11786--methylcysteine	0.4	0.0199434	0.00152163	115949	M33131.metal.pos.txt	Amino acid	Methionine, Cysteine, SAM and Taurine Metabolism	Shin	2773	#N/A	1765	0.0785421	No	No	No
63		X-11786--methylcysteine	X-11786--methylcysteine	0.5	0.0369588	0.00115109	135385	M33131.metal.pos.txt	Amino acid	Methionine, Cysteine, SAM and Taurine Metabolism	Shin	2773	#N/A	2228	0.115305	No	No	No
64	M33884	X-12442--5,8-tetradecadienoate	X-12442--5,8-tetradecadienoate	0.001	0.458579	1.47516e-06	856	M33884.metal.pos.txt	Lipid	Long chain fatty acid	Shin	7334	#N/A	6647	0.479552	No	No	No
65		X-12442--5,8-tetradecadienoate	X-12442--5,8-tetradecadienoate	0.05	4.05702e-06	0.00271118	22464	M33884.metal.pos.txt	Lipid	Long chain fatty acid	Shin	7334	#N/A	74	0.000381086	Yes	Yes	Yes
66		X-12442--5,8-tetradecadienoate	X-12442--5,8-tetradecadienoate	0.1	7.99541e-07	0.00313456	39528	M33884.metal.pos.txt	Lipid	Long chain fatty acid	Shin	7334	#N/A	28	0.000198486	Yes	Yes	Yes
67		X-12442--5,8-tetradecadienoate	X-12442--5,8-tetradecadienoate	0.2	1.84826e-06	0.00291585	68520	M33884.metal.pos.txt	Lipid	Long chain fatty acid	Shin	7334	#N/A	48	0.000267651	Yes	Yes	Yes
68		X-12442--5,8-tetradecadienoate	X-12442--5,8-tetradecadienoate	0.3	1.70913e-06	0.00293626	93696	M33884.metal.pos.txt	Lipid	Long chain fatty acid	Shin	7334	#N/A	43	0.000276283	Yes	Yes	Yes
69		X-12442--5,8-tetradecadienoate	X-12442--5,8-tetradecadienoate	0.4	6.7552e-06	0.00257876	115948	M33884.metal.pos.txt	Lipid	Long chain fatty acid	Shin	7334	#N/A	98	0.000479137	Yes	Yes	Yes
70		X-12442--5,8-tetradecadienoate	X-12442--5,8-tetradecadienoate	0.5	9.29164e-06	0.00249609	135384	M33884.metal.pos.txt	Lipid	Long chain fatty acid	Shin	7334	#N/A	113	0.000571559	Yes	Yes	No
71	Summary_statistics_MAGNETIC_M.HDL.CE.txt_TS_Oct2018.so_RAW.txt	cholesterol,esters,in,medium,hdl	M.HDL.CE	0.001	0.172392	4.63105e-05	2242	Summary_statistics_MAGNETIC_M.HDL.CE.txt	Lipid	Lipid ratios	Kettunen	19273	#N/A	4135	0.289793	No	No	No
72		cholesterol,esters,in,medium,hdl	M.HDL.CE	0.05	0.344645	8.29424e-06	68606	Summary_statistics_MAGNETIC_M.HDL.CE.txt	Lipid	Lipid ratios	Kettunen	19273	#N/A	5723	0.418596	No	No	No
73		cholesterol,esters,in,medium,hdl	M.HDL.CE	0.1	0.331455	9.85874e-06	124270	Summary_statistics_MAGNETIC_M.HDL.CE.txt	Lipid	Lipid ratios	Kettunen	19273	#N/A	5599	0.411492	No	No	No
74		cholesterol,esters,in,medium,hdl	M.HDL.CE	0.2	0.298361	1.45263e-05	223348	Summary_statistics_MAGNETIC_M.HDL.CE.txt	Lipid	Lipid ratios	Kettunen	19273	#N/A	5306	0.390861	No	No	No
75		cholesterol,esters,in,medium,hdl	M.HDL.CE	0.3	0.450873	7.90826e-07	310846	Summary_statistics_MAGNETIC_M.HDL.CE.txt	Lipid	Lipid ratios	Kettunen	19273	#N/A	6582	0.47615	No	No	No
76		cholesterol,esters,in,medium,hdl	M.HDL.CE	0.4	0.488037	4.66732e-08	389982	Summary_statistics_MAGNETIC_M.HDL.CE.txt	Lipid	Lipid ratios	Kettunen	19273	#N/A	6868	0.493935	No	No	No
77		cholesterol,esters,in,medium,hdl	M.HDL.CE	0.5	0.493698	1.29503e-08	460783	Summary_statistics_MAGNETIC_M.HDL.CE.txt	Lipid	Lipid ratios	Kettunen	19273	#N/A	6906	0.496915	No	No	No
78	M32322	glutamate	Glu	0.001	0.424993	4.86235e-06	856	M32322.metal.pos.txt	Amino acid	Glutamate Metabolism	Shin	7357	HMDB0000148	6385	0.462667	No	No	No
79		glutamate	Glu	0.05	0.00344094	0.000992241	22464	M32322.metal.pos.txt	Amino acid	Glutamate Metabolism	Shin	7357	HMDB0000148	998	0.0239659	Yes	No	No
80		glutamate	Glu	0.1	0.00169639	0.00116599	39527	M32322.metal.pos.txt	Amino acid	Glutamate Metabolism	Shin	7357	HMDB0000148	788	0.014964	Yes	No	No
81		glutamate	Glu	0.2	0.00277732	0.00104463	68519	M32322.metal.pos.txt	Amino acid	Glutamate Metabolism	Shin	7357	HMDB0000148	935	0.0206472	Yes	No	No
82		glutamate	Glu	0.3	0.0024732	0.00107309	93692	M32322.metal.pos.txt	Amino acid	Glutamate Metabolism	Shin	7357	HMDB0000148	906	0.0189749	Yes	No	No
83		glutamate	Glu	0.4	0.000917237	0.00131872	115942	M32322.metal.pos.txt	Amino acid	Glutamate Metabolism	Shin	7357	HMDB0000148	649	0.00982391	Yes	Yes	No
84		glutamate	Glu	0.5	0.00136809	0.00121926	135379	M32322.metal.pos.txt	Amino acid	Glutamate Metabolism	Shin	7357	HMDB0000148	736	0.0129206	Yes	No	No
85	MIP1a.data_TS_Oct2018.so_RAW.txt	Macrophage inflammatory protein-1α (CCL3)	MIP1a	0.001	0.489499	1.96767e-07	2000	MIP1a.data	Cytokine	#N/A	Ahola-Olli	3522	#N/A	6875	0.49491	No	No	No
86		Macrophage inflammatory protein-1α (CCL3)	MIP1a	0.05	0.259823	0.000117709	58598	MIP1a.data	Cytokine	#N/A	Ahola-Olli	3522	#N/A	4960	0.364119	No	No	No
87		Macrophage inflammatory protein-1α (CCL3)	MIP1a	0.1	0.294922	8.25034e-05	105252	MIP1a.data	Cytokine	#N/A	Ahola-Olli	3522	#N/A	5275	0.388626	No	No	No
88		Macrophage inflammatory protein-1α (CCL3)	MIP1a	0.2	0.350541	4.1836e-05	187593	MIP1a.data	Cytokine	#N/A	Ahola-Olli	3522	#N/A	5776	0.42185	No	No	No
89		Macrophage inflammatory protein-1α (CCL3)	MIP1a	0.3	0.346386	4.43209e-05	259391	MIP1a.data	Cytokine	#N/A	Ahola-Olli	3522	#N/A	5740	0.419465	No	No	No
90		Macrophage inflammatory protein-1α (CCL3)	MIP1a	0.4	0.208177	0.000187542	323861	MIP1a.data	Cytokine	#N/A	Ahola-Olli	3522	#N/A	4482	0.322855	No	No	No
91		Macrophage inflammatory protein-1α (CCL3)	MIP1a	0.5	0.181656	0.000234615	381272	MIP1a.data	Cytokine	#N/A	Ahola-Olli	3522	#N/A	4233	0.298297	No	No	No
92	M33195	X-11850	X-11850	0.001	0.154792	0.000223208	856	M33195.metal.pos.txt	Unknown	Unknown	Shin	4625	#N/A	3958	0.271844	No	No	No
93		X-11850	X-11850	0.05	0.136321	0.000260161	22458	M33195.metal.pos.txt	Unknown	Unknown	Shin	4625	#N/A	3752	0.252551	No	No	No
94		X-11850	X-11850	0.1	0.024402	0.000839018	39518	M33195.metal.pos.txt	Unknown	Unknown	Shin	4625	#N/A	1912	0.0887123	No	No	No
95		X-11850	X-11850	0.2	0.0530724	0.000564317	68503	M33195.metal.pos.txt	Unknown	Unknown	Shin	4625	#N/A	2588	0.142545	No	No	No
96		X-11850	X-11850	0.3	0.128263	0.000278319	93684	M33195.metal.pos.txt	Unknown	Unknown	Shin	4625	#N/A	3657	0.243795	No	No	No
97		X-11850	X-11850	0.4	0.167179	0.000201481	115930	M33195.metal.pos.txt	Unknown	Unknown	Shin	4625	#N/A	4091	0.284054	No	No	No
98		X-11850	X-11850	0.5	0.22772	0.000120442	135373	M33195.metal.pos.txt	Unknown	Unknown	Shin	4625	#N/A	4673	0.338729	No	No	No
99	Summary_statistics_MAGNETIC_XL.HDL.PL.txt_TS_Oct2018.so_RAW.txt	phospholipids,in,very,large,hdl	XL.HDL.PL	0.001	0.361547	6.51409e-06	2242	Summary_statistics_MAGNETIC_XL.HDL.PL.txt	Lipid	Lipid ratios	Kettunen	19273	#N/A	5847	0.429813	No	No	No
100		phospholipids,in,very,large,hdl	XL.HDL.PL	0.05	0.461524	4.8414e-07	68619	Summary_statistics_MAGNETIC_XL.HDL.PL.txt	Lipid	Lipid ratios	Kettunen	19273	#N/A	6677	0.480463	No	No	No
101		phospholipids,in,very,large,hdl	XL.HDL.PL	0.1	0.321255	1.118e-05	124293	Summary_statistics_MAGNETIC_XL.HDL.PL.txt	Lipid	Lipid ratios	Kettunen	19273	#N/A	5502	0.405861	No	No	No
102		phospholipids,in,very,large,hdl	XL.HDL.PL	0.2	0.196756	3.77754e-05	223381	Summary_statistics_MAGNETIC_XL.HDL.PL.txt	Lipid	Lipid ratios	Kettunen	19273	#N/A	4380	0.31225	No	No	No
103		phospholipids,in,very,large,hdl	XL.HDL.PL	0.3	0.19708	3.76723e-05	310903	Summary_statistics_MAGNETIC_XL.HDL.PL.txt	Lipid	Lipid ratios	Kettunen	19273	#N/A	4381	0.312692	No	No	No
104		phospholipids,in,very,large,hdl	XL.HDL.PL	0.4	0.19458	3.84762e-05	390060	Summary_statistics_MAGNETIC_XL.HDL.PL.txt	Lipid	Lipid ratios	Kettunen	19273	#N/A	4357	0.310425	No	No	No
105		phospholipids,in,very,large,hdl	XL.HDL.PL	0.5	0.20715	3.45775e-05	460877	Summary_statistics_MAGNETIC_XL.HDL.PL.txt	Lipid	Lipid ratios	Kettunen	19273	#N/A	4478	0.32155	No	No	No
106	M36553	X-14626	X-14626	0.001	0.490055	9.61501e-08	856	M36553.metal.pos.txt	Unknown	Unknown	Shin	6464	#N/A	6881	0.495041	No	No	No
107		X-14626	X-14626	0.05	0.0978377	0.000258995	22466	M36553.metal.pos.txt	Unknown	Unknown	Shin	6464	#N/A	3250	0.209252	No	No	No
108		X-14626	X-14626	0.1	0.369045	1.72975e-05	39538	M36553.metal.pos.txt	Unknown	Unknown	Shin	6464	#N/A	5918	0.433463	No	No	No
109		X-14626	X-14626	0.2	0.256934	6.59295e-05	68516	M36553.metal.pos.txt	Unknown	Unknown	Shin	6464	#N/A	4925	0.362629	No	No	No
110		X-14626	X-14626	0.3	0.244734	7.38979e-05	93689	M36553.metal.pos.txt	Unknown	Unknown	Shin	6464	#N/A	4813	0.353449	No	No	No
111		X-14626	X-14626	0.4	0.17325	0.000137094	115944	M36553.metal.pos.txt	Unknown	Unknown	Shin	6464	#N/A	4142	0.290744	No	No	No
112		X-14626	X-14626	0.5	0.192587	0.000116658	135376	M36553.metal.pos.txt	Unknown	Unknown	Shin	6464	#N/A	4338	0.308592	No	No	No
113	Summary_statistics_MAGNETIC_M.HDL.PL.txt_TS_Oct2018.so_RAW.txt	phospholipids,in,medium,hdl	M.HDL.PL	0.001	0.155651	4.75517e-05	2243	Summary_statistics_MAGNETIC_M.HDL.PL.txt	Lipid	Lipid ratios	Kettunen	21558	#N/A	3966	0.272801	No	No	No
114		phospholipids,in,medium,hdl	M.HDL.PL	0.05	0.325231	9.5239e-06	68676	Summary_statistics_MAGNETIC_M.HDL.PL.txt	Lipid	Lipid ratios	Kettunen	21558	#N/A	5541	0.407992	No	No	No
115		phospholipids,in,medium,hdl	M.HDL.PL	0.1	0.249746	2.11527e-05	124391	Summary_statistics_MAGNETIC_M.HDL.PL.txt	Lipid	Lipid ratios	Kettunen	21558	#N/A	4866	0.356758	No	No	No
116		phospholipids,in,medium,hdl	M.HDL.PL	0.2	0.273432	1.68365e-05	223594	Summary_statistics_MAGNETIC_M.HDL.PL.txt	Lipid	Lipid ratios	Kettunen	21558	#N/A	5077	0.37436	No	No	No
117		phospholipids,in,medium,hdl	M.HDL.PL	0.3	0.245172	2.2069e-05	311216	Summary_statistics_MAGNETIC_M.HDL.PL.txt	Lipid	Lipid ratios	Kettunen	21558	#N/A	4823	0.353347	No	No	No
118		phospholipids,in,medium,hdl	M.HDL.PL	0.4	0.197411	3.35851e-05	390437	Summary_statistics_MAGNETIC_M.HDL.PL.txt	Lipid	Lipid ratios	Kettunen	21558	#N/A	4384	0.313003	No	No	No
119		phospholipids,in,medium,hdl	M.HDL.PL	0.5	0.210892	2.99345e-05	461317	Summary_statistics_MAGNETIC_M.HDL.PL.txt	Lipid	Lipid ratios	Kettunen	21558	#N/A	4510	0.325036	No	No	No
120	threonine	threonine	Thr	0.001	0.153864	0.000577191	942	normres_threonine_imputed_complete_CHARGE.csv	Amino acid	Glycine, Serine and Threonine Metabolism	Rhee	1802	HMDB0000167	3949	0.270831	No	No	No
121		threonine	Thr	0.05	0.150478	0.000593585	25643	normres_threonine_imputed_complete_CHARGE.csv	Amino acid	Glycine, Serine and Threonine Metabolism	Rhee	1802	HMDB0000167	3911	0.267443	No	No	No
122		threonine	Thr	0.1	0.0485921	0.00152556	45471	normres_threonine_imputed_complete_CHARGE.csv	Amino acid	Glycine, Serine and Threonine Metabolism	Rhee	1802	HMDB0000167	2496	0.135322	No	No	No
123		threonine	Thr	0.2	0.134914	0.000675477	79790	normres_threonine_imputed_complete_CHARGE.csv	Amino acid	Glycine, Serine and Threonine Metabolism	Rhee	1802	HMDB0000167	3731	0.25135	No	No	No
124		threonine	Thr	0.3	0.167296	0.000516537	109794	normres_threonine_imputed_complete_CHARGE.csv	Amino acid	Glycine, Serine and Threonine Metabolism	Rhee	1802	HMDB0000167	4092	0.284183	No	No	No
125		threonine	Thr	0.4	0.126677	0.000723776	136596	normres_threonine_imputed_complete_CHARGE.csv	Amino acid	Glycine, Serine and Threonine Metabolism	Rhee	1802	HMDB0000167	3629	0.242637	No	No	No
126		threonine	Thr	0.5	0.100822	0.000904381	160355	normres_threonine_imputed_complete_CHARGE.csv	Amino acid	Glycine, Serine and Threonine Metabolism	Rhee	1802	HMDB0000167	3290	0.213013	No	No	No
127	3-hydroxybutyrate (BHBA)	3-hydroxybutyrate (BHBA)	BHBA	0.001	0.495307	9.51151e-08	942	normres_beta_hydroxybutyrate_imputed_complete_CHARGE.csv	Lipid	Ketone Bodies	Rhee	1455	HMDB0000357	6917	0.497742	No	No	No
128		3-hydroxybutyrate (BHBA)	BHBA	0.05	0.495864	7.38575e-08	25642	normres_beta_hydroxybutyrate_imputed_complete_CHARGE.csv	Lipid	Ketone Bodies	Rhee	1455	HMDB0000357	6924	0.497798	No	No	No
129		3-hydroxybutyrate (BHBA)	BHBA	0.1	0.168075	0.000635577	45470	normres_beta_hydroxybutyrate_imputed_complete_CHARGE.csv	Lipid	Ketone Bodies	Rhee	1455	HMDB0000357	4098	0.285088	No	No	No
130		3-hydroxybutyrate (BHBA)	BHBA	0.2	0.0910962	0.00122238	79787	normres_beta_hydroxybutyrate_imputed_complete_CHARGE.csv	Lipid	Ketone Bodies	Rhee	1455	HMDB0000357	3176	0.199373	No	No	No
131		3-hydroxybutyrate (BHBA)	BHBA	0.3	0.0763151	0.00140504	109791	normres_beta_hydroxybutyrate_imputed_complete_CHARGE.csv	Lipid	Ketone Bodies	Rhee	1455	HMDB0000357	2965	0.178909	No	No	No
132		3-hydroxybutyrate (BHBA)	BHBA	0.4	0.117299	0.000970498	136592	normres_beta_hydroxybutyrate_imputed_complete_CHARGE.csv	Lipid	Ketone Bodies	Rhee	1455	HMDB0000357	3508	0.232425	No	No	No
133		3-hydroxybutyrate (BHBA)	BHBA	0.5	0.0642661	0.00158647	160350	normres_beta_hydroxybutyrate_imputed_complete_CHARGE.csv	Lipid	Ketone Bodies	Rhee	1455	HMDB0000357	2797	0.159712	No	No	No
134	alanine	alanine	Ala	0.001	0.34051	9.37696e-05	942	normres_alanine_imputed_complete_CHARGE.csv	Amino acid	Alanine and Aspartate Metabolism	Rhee	1802	HMDB0000161	5685	0.416338	No	No	No
135		alanine	Ala	0.05	0.276665	0.000194979	25643	normres_alanine_imputed_complete_CHARGE.csv	Amino acid	Alanine and Aspartate Metabolism	Rhee	1802	HMDB0000161	5109	0.376413	No	No	No
136		alanine	Ala	0.1	0.36477	6.63323e-05	45471	normres_alanine_imputed_complete_CHARGE.csv	Amino acid	Alanine and Aspartate Metabolism	Rhee	1802	HMDB0000161	5879	0.431283	No	No	No
137		alanine	Ala	0.2	0.199978	0.000393074	79790	normres_alanine_imputed_complete_CHARGE.csv	Amino acid	Alanine and Aspartate Metabolism	Rhee	1802	HMDB0000161	4416	0.314775	No	No	No
138		alanine	Ala	0.3	0.443129	1.13543e-05	109794	normres_alanine_imputed_complete_CHARGE.csv	Amino acid	Alanine and Aspartate Metabolism	Rhee	1802	HMDB0000161	6522	0.472277	No	No	No
139		alanine	Ala	0.4	0.411159	2.79849e-05	136596	normres_alanine_imputed_complete_CHARGE.csv	Amino acid	Alanine and Aspartate Metabolism	Rhee	1802	HMDB0000161	6259	0.456617	No	No	No
140		alanine	Ala	0.5	0.352092	7.9995e-05	160355	normres_alanine_imputed_complete_CHARGE.csv	Amino acid	Alanine and Aspartate Metabolism	Rhee	1802	HMDB0000161	5791	0.422619	No	No	No
141	MetaAnalysis_PC.aa.C42.4_HetISqLt75_HetDfGt0_HWEPValGt1EMinus6.tsv.fixed_TS_Oct2018.so_RAW.txt	phosphatidylcholine diacyl c42:4	PC aa C42:4	0.001	0.346217	2.09284e-05	936	MetaAnalysis_PC.aa.C42.4_HetISqLt75_HetDfGt0_HWEPValGt1EMinus6.tsv.fixed	Lipid	Glycerophospholipids	Draaisma	7476	#N/A	5739	0.419334	No	No	No
142		phosphatidylcholine diacyl c42:4	PC aa C42:4	0.05	0.0405944	0.000406678	24937	MetaAnalysis_PC.aa.C42.4_HetISqLt75_HetDfGt0_HWEPValGt1EMinus6.tsv.fixed	Lipid	Glycerophospholipids	Draaisma	7476	#N/A	2325	0.121364	No	No	No
143		phosphatidylcholine diacyl c42:4	PC aa C42:4	0.1	0.0518623	0.000354047	44009	MetaAnalysis_PC.aa.C42.4_HetISqLt75_HetDfGt0_HWEPValGt1EMinus6.tsv.fixed	Lipid	Glycerophospholipids	Draaisma	7476	#N/A	2562	0.140708	No	No	No
144		phosphatidylcholine diacyl c42:4	PC aa C42:4	0.2	0.0126494	0.000669026	76901	MetaAnalysis_PC.aa.C42.4_HetISqLt75_HetDfGt0_HWEPValGt1EMinus6.tsv.fixed	Lipid	Glycerophospholipids	Draaisma	7476	#N/A	1527	0.057581	No	No	No
145		phosphatidylcholine diacyl c42:4	PC aa C42:4	0.3	0.0060569	0.000841558	105504	MetaAnalysis_PC.aa.C42.4_HetISqLt75_HetDfGt0_HWEPValGt1EMinus6.tsv.fixed	Lipid	Glycerophospholipids	Draaisma	7476	#N/A	1194	0.0352609	Yes	No	No
146		phosphatidylcholine diacyl c42:4	PC aa C42:4	0.4	0.000982143	0.00128096	130928	MetaAnalysis_PC.aa.C42.4_HetISqLt75_HetDfGt0_HWEPValGt1EMinus6.tsv.fixed	Lipid	Glycerophospholipids	Draaisma	7476	#N/A	662	0.0103125	Yes	No	No
147		phosphatidylcholine diacyl c42:4	PC aa C42:4	0.5	0.00124915	0.00122208	153335	MetaAnalysis_PC.aa.C42.4_HetISqLt75_HetDfGt0_HWEPValGt1EMinus6.tsv.fixed	Lipid	Glycerophospholipids	Draaisma	7476	#N/A	715	0.0121439	Yes	No	No
148	M21188	1-stearoylglycerol (1-monostearin)	1-stearoylglycerol (1-monostearin)	0.001	0.109714	0.000230009	857	M21188.metal.pos.txt	Lipid	Monoacylglycerol	Shin	6556	HMDB31075	3399	0.224366	No	No	No
149		1-stearoylglycerol (1-monostearin)	1-stearoylglycerol (1-monostearin)	0.05	0.450965	2.31605e-06	22464	M21188.metal.pos.txt	Lipid	Monoacylglycerol	Shin	6556	HMDB31075	6583	0.476175	No	No	No
150		1-stearoylglycerol (1-monostearin)	1-stearoylglycerol (1-monostearin)	0.1	0.362208	1.89596e-05	39526	M21188.metal.pos.txt	Lipid	Monoacylglycerol	Shin	6556	HMDB31075	5852	0.430231	No	No	No
151		1-stearoylglycerol (1-monostearin)	1-stearoylglycerol (1-monostearin)	0.2	0.363468	1.86001e-05	68527	M21188.metal.pos.txt	Lipid	Monoacylglycerol	Shin	6556	HMDB31075	5865	0.43077	No	No	No
152		1-stearoylglycerol (1-monostearin)	1-stearoylglycerol (1-monostearin)	0.3	0.212368	9.7185e-05	93695	M21188.metal.pos.txt	Lipid	Monoacylglycerol	Shin	6556	HMDB31075	4517	0.326803	No	No	No
153		1-stearoylglycerol (1-monostearin)	1-stearoylglycerol (1-monostearin)	0.4	0.18981	0.000117738	115949	M21188.metal.pos.txt	Lipid	Monoacylglycerol	Shin	6556	HMDB31075	4312	0.305976	No	No	No
154		1-stearoylglycerol (1-monostearin)	1-stearoylglycerol (1-monostearin)	0.5	0.278533	5.25931e-05	135378	M21188.metal.pos.txt	Lipid	Monoacylglycerol	Shin	6556	HMDB31075	5130	0.377404	No	No	No
155	M32675	C-glycosyltryptophan*	C-glycosyltryptophan*	0.001	0.0141449	0.00065532	856	M32675.metal.pos.txt	Amino acid	Tryptophan Metabolism	Shin	7338	HMDB0240296	1573	0.0625056	No	No	No
156		C-glycosyltryptophan*	C-glycosyltryptophan*	0.05	0.0528946	0.00035644	22465	M32675.metal.pos.txt	Amino acid	Tryptophan Metabolism	Shin	7338	HMDB0240296	2586	0.142177	No	No	No
157		C-glycosyltryptophan*	C-glycosyltryptophan*	0.1	0.0848164	0.00025701	39529	M32675.metal.pos.txt	Amino acid	Tryptophan Metabolism	Shin	7338	HMDB0240296	3091	0.190734	No	No	No
158		C-glycosyltryptophan*	C-glycosyltryptophan*	0.2	0.0526007	0.000357645	68521	M32675.metal.pos.txt	Amino acid	Tryptophan Metabolism	Shin	7338	HMDB0240296	2582	0.141606	No	No	No
159		C-glycosyltryptophan*	C-glycosyltryptophan*	0.3	0.0324288	0.000464405	93698	M32675.metal.pos.txt	Amino acid	Tryptophan Metabolism	Shin	7338	HMDB0240296	2099	0.107391	No	No	No
160		C-glycosyltryptophan*	C-glycosyltryptophan*	0.4	0.0363036	0.000439134	115951	M32675.metal.pos.txt	Amino acid	Tryptophan Metabolism	Shin	7338	HMDB0240296	2213	0.114029	No	No	No
161		C-glycosyltryptophan*	C-glycosyltryptophan*	0.5	0.0203956	0.000570111	135383	M32675.metal.pos.txt	Amino acid	Tryptophan Metabolism	Shin	7338	HMDB0240296	1790	0.0792011	No	No	No
162	TNFb.data	Tumor necrosis factor-beta	TNFb	0.001	0.339305	0.000110125	1382	TNFb.data	Cytokine	#N/A	Ahola-Olli	1559	#N/A	5675	0.415596	No	No	No
163		Tumor necrosis factor-beta	TNFb	0.05	0.000131678	0.00850407	35546	TNFb.data	Cytokine	#N/A	Ahola-Olli	1559	#N/A	348	0.00263015	Yes	Yes	No
164		Tumor necrosis factor-beta	TNFb	0.1	0.00115607	0.00593715	62499	TNFb.data	Cytokine	#N/A	Ahola-Olli	1559	#N/A	697	0.0115292	Yes	No	No
165		Tumor necrosis factor-beta	TNFb	0.2	5.56869e-05	0.0095331	108804	TNFb.data	Cytokine	#N/A	Ahola-Olli	1559	#N/A	239	0.00161958	Yes	Yes	No
166		Tumor necrosis factor-beta	TNFb	0.3	3.75007e-06	0.0127856	148461	TNFb.data	Cytokine	#N/A	Ahola-Olli	1559	#N/A	69	0.000377779	Yes	Yes	Yes
167		Tumor necrosis factor-beta	TNFb	0.4	1.6949e-05	0.010963	183366	TNFb.data	Cytokine	#N/A	Ahola-Olli	1559	#N/A	148	0.00079603	Yes	Yes	No
168		Tumor necrosis factor-beta	TNFb	0.5	5.21118e-06	0.0123873	213871	TNFb.data	Cytokine	#N/A	Ahola-Olli	1559	#N/A	84	0.000431225	Yes	Yes	Yes
169	TNFa.data	Tumor necrosis factor-alpha	TNFa	0.001	0.056673	0.000725544	1990	TNFa.data	Cytokine	#N/A	Ahola-Olli	3454	#N/A	2657	0.148263	No	No	No
170		Tumor necrosis factor-alpha	TNFa	0.05	0.135944	0.000349447	58527	TNFa.data	Cytokine	#N/A	Ahola-Olli	3454	#N/A	3746	0.252254	No	No	No
171		Tumor necrosis factor-alpha	TNFa	0.1	0.153562	0.000301923	105116	TNFa.data	Cytokine	#N/A	Ahola-Olli	3454	#N/A	3941	0.270848	No	No	No
172		Tumor necrosis factor-alpha	TNFa	0.2	0.229574	0.000158636	187442	TNFa.data	Cytokine	#N/A	Ahola-Olli	3454	#N/A	4693	0.340031	No	No	No
173		Tumor necrosis factor-alpha	TNFa	0.3	0.175945	0.000250875	259149	TNFa.data	Cytokine	#N/A	Ahola-Olli	3454	#N/A	4171	0.293213	No	No	No
174		Tumor necrosis factor-alpha	TNFa	0.4	0.160485	0.000285132	323565	TNFa.data	Cytokine	#N/A	Ahola-Olli	3454	#N/A	4012	0.278049	No	No	No
175		Tumor necrosis factor-alpha	TNFa	0.5	0.152263	0.000305184	380936	TNFa.data	Cytokine	#N/A	Ahola-Olli	3454	#N/A	3925	0.269651	No	No	No
176	normres_urate_imputed_complete_CHARGE.csv_TS_Oct2018.so_RAW.txt	urate	urate	0.001	0.230207	0.000374424	942	normres_urate_imputed_complete_CHARGE.csv	Nucleotide	Purine Metabolism, (Hypo)Xanthine/Inosine containing	Rhee	1455	HMDB0000289	4699	0.340533	No	No	No
177		urate	urate	0.05	0.0508926	0.00183841	25642	normres_urate_imputed_complete_CHARGE.csv	Nucleotide	Purine Metabolism, (Hypo)Xanthine/Inosine containing	Rhee	1455	HMDB0000289	2544	0.139054	No	No	No
178		urate	urate	0.1	0.00903951	0.00383351	45470	normres_urate_imputed_complete_CHARGE.csv	Nucleotide	Purine Metabolism, (Hypo)Xanthine/Inosine containing	Rhee	1455	HMDB0000289	1373	0.0457637	Yes	No	No
179		urate	urate	0.2	0.0196035	0.00291798	79787	normres_urate_imputed_complete_CHARGE.csv	Nucleotide	Purine Metabolism, (Hypo)Xanthine/Inosine containing	Rhee	1455	HMDB0000289	1749	0.0779098	No	No	No
180		urate	urate	0.3	0.0282385	0.00249717	109791	normres_urate_imputed_complete_CHARGE.csv	Nucleotide	Purine Metabolism, (Hypo)Xanthine/Inosine containing	Rhee	1455	HMDB0000289	2007	0.0978006	No	No	No
181		urate	urate	0.4	0.0454618	0.0019623	136592	normres_urate_imputed_complete_CHARGE.csv	Nucleotide	Purine Metabolism, (Hypo)Xanthine/Inosine containing	Rhee	1455	HMDB0000289	2437	0.12967	No	No	No
182		urate	urate	0.5	0.0350703	0.00225157	160350	normres_urate_imputed_complete_CHARGE.csv	Nucleotide	Purine Metabolism, (Hypo)Xanthine/Inosine containing	Rhee	1455	HMDB0000289	2180	0.111823	No	No	No
183	M36776	7-alpha-hydroxy-3-oxo-4-cholestenoate (7-hoca)	7-Hoca	0.001	0.148361	0.000148438	856	M36776.metal.pos.txt	Lipid	Sterol	Shin	7335	HMDB12458	3881	0.265719	No	No	No
184		7-alpha-hydroxy-3-oxo-4-cholestenoate (7-hoca)	7-Hoca	0.05	0.227028	7.64127e-05	22465	M36776.metal.pos.txt	Lipid	Sterol	Shin	7335	HMDB12458	4666	0.338206	No	No	No
185		7-alpha-hydroxy-3-oxo-4-cholestenoate (7-hoca)	7-Hoca	0.1	0.0132439	0.000671062	39529	M36776.metal.pos.txt	Lipid	Sterol	Shin	7335	HMDB12458	1543	0.059662	No	No	No
186		7-alpha-hydroxy-3-oxo-4-cholestenoate (7-hoca)	7-Hoca	0.2	0.0139169	0.000659405	68523	M36776.metal.pos.txt	Lipid	Sterol	Shin	7335	HMDB12458	1566	0.0617731	No	No	No
187		7-alpha-hydroxy-3-oxo-4-cholestenoate (7-hoca)	7-Hoca	0.3	0.004601	0.000924344	93699	M36776.metal.pos.txt	Lipid	Sterol	Shin	7335	HMDB12458	1097	0.0291536	Yes	No	No
188		7-alpha-hydroxy-3-oxo-4-cholestenoate (7-hoca)	7-Hoca	0.4	0.0103023	0.000730466	115952	M36776.metal.pos.txt	Lipid	Sterol	Shin	7335	HMDB12458	1422	0.0503598	No	No	No
189		7-alpha-hydroxy-3-oxo-4-cholestenoate (7-hoca)	7-Hoca	0.5	0.0172307	0.000609449	135388	M36776.metal.pos.txt	Lipid	Sterol	Shin	7335	HMDB12458	1671	0.0716759	No	No	No
190	Summary_statistics_MAGNETIC_M.VLDL.TG.txt_TS_Oct2018.so_RAW.txt	triglycerides,in,medium,vldl	M.VLDL.TG	0.001	0.278966	1.6162e-05	2243	Summary_statistics_MAGNETIC_M.VLDL.TG.txt	Lipid	Lipid ratios	Kettunen	21241	#N/A	5135	0.377622	No	No	No
191		triglycerides,in,medium,vldl	M.VLDL.TG	0.05	0.369239	5.24784e-06	68605	Summary_statistics_MAGNETIC_M.VLDL.TG.txt	Lipid	Lipid ratios	Kettunen	21241	#N/A	5920	0.433544	No	No	No
192		triglycerides,in,medium,vldl	M.VLDL.TG	0.1	0.435085	1.25762e-06	124251	Summary_statistics_MAGNETIC_M.VLDL.TG.txt	Lipid	Lipid ratios	Kettunen	21241	#N/A	6459	0.468227	No	No	No
193		triglycerides,in,medium,vldl	M.VLDL.TG	0.2	0.361658	5.90074e-06	223339	Summary_statistics_MAGNETIC_M.VLDL.TG.txt	Lipid	Lipid ratios	Kettunen	21241	#N/A	5848	0.429871	No	No	No
194		triglycerides,in,medium,vldl	M.VLDL.TG	0.3	0.320421	1.02462e-05	310824	Summary_statistics_MAGNETIC_M.VLDL.TG.txt	Lipid	Lipid ratios	Kettunen	21241	#N/A	5498	0.405102	No	No	No
195		triglycerides,in,medium,vldl	M.VLDL.TG	0.4	0.342897	7.70568e-06	389932	Summary_statistics_MAGNETIC_M.VLDL.TG.txt	Lipid	Lipid ratios	Kettunen	21241	#N/A	5705	0.417787	No	No	No
196		triglycerides,in,medium,vldl	M.VLDL.TG	0.5	0.293445	1.38988e-05	460694	Summary_statistics_MAGNETIC_M.VLDL.TG.txt	Lipid	Lipid ratios	Kettunen	21241	#N/A	5260	0.387783	No	No	No
197	Summary_statistics_MAGNETIC_S.HDL.L.txt_TS_Oct2018.so_RAW.txt	total,lipids,in,small,hdl	S.HDL.L	0.001	0.156973	5.26112e-05	2242	Summary_statistics_MAGNETIC_S.HDL.L.txt	Lipid	Lipid ratios	Kettunen	19273	#N/A	3981	0.274082	No	No	No
198		total,lipids,in,small,hdl	S.HDL.L	0.05	0.182808	4.24683e-05	68610	Summary_statistics_MAGNETIC_S.HDL.L.txt	Lipid	Lipid ratios	Kettunen	19273	#N/A	4247	0.299199	No	No	No
199		total,lipids,in,small,hdl	S.HDL.L	0.1	0.0428571	0.000153212	124274	Summary_statistics_MAGNETIC_S.HDL.L.txt	Lipid	Lipid ratios	Kettunen	19273	#N/A	2382	0.125063	No	No	No
200		total,lipids,in,small,hdl	S.HDL.L	0.2	0.0154837	0.000241488	223341	Summary_statistics_MAGNETIC_S.HDL.L.txt	Lipid	Lipid ratios	Kettunen	19273	#N/A	1610	0.0668492	No	No	No
201		total,lipids,in,small,hdl	S.HDL.L	0.3	0.0174753	0.000230741	310843	Summary_statistics_MAGNETIC_S.HDL.L.txt	Lipid	Lipid ratios	Kettunen	19273	#N/A	1683	0.072175	No	No	No
202		total,lipids,in,small,hdl	S.HDL.L	0.4	0.00890674	0.000291267	389983	Summary_statistics_MAGNETIC_S.HDL.L.txt	Lipid	Lipid ratios	Kettunen	19273	#N/A	1366	0.0453226	Yes	No	No
203		total,lipids,in,small,hdl	S.HDL.L	0.5	0.0170475	0.000232938	460762	Summary_statistics_MAGNETIC_S.HDL.L.txt	Lipid	Lipid ratios	Kettunen	19273	#N/A	1667	0.0710843	No	No	No
204	M33901	X-12456	X-12456	0.001	0.00870057	0.00124684	858	M33901.metal.pos.txt	Unknown	Unknown	Shin	4533	#N/A	1354	0.0446659	Yes	No	No
205		X-12456	X-12456	0.05	0.0408392	0.000668469	22460	M33901.metal.pos.txt	Unknown	Unknown	Shin	4533	#N/A	2330	0.121834	No	No	No
206		X-12456	X-12456	0.1	0.073539	0.000463669	39529	M33901.metal.pos.txt	Unknown	Unknown	Shin	4533	#N/A	2924	0.174819	No	No	No
207		X-12456	X-12456	0.2	0.219917	0.000131629	68523	M33901.metal.pos.txt	Unknown	Unknown	Shin	4533	#N/A	4593	0.332821	No	No	No
208		X-12456	X-12456	0.3	0.214594	0.000137873	93714	M33901.metal.pos.txt	Unknown	Unknown	Shin	4533	#N/A	4542	0.328411	No	No	No
209		X-12456	X-12456	0.4	0.198644	0.000158055	115967	M33901.metal.pos.txt	Unknown	Unknown	Shin	4533	#N/A	4396	0.314098	No	No	No
210		X-12456	X-12456	0.5	0.268124	8.43863e-05	135418	M33901.metal.pos.txt	Unknown	Unknown	Shin	4533	#N/A	5033	0.370302	No	No	No
211	MetaAnalysis_C14.1_HetISqLt75_HetDfGt0_HWEPValGt1EMinus6.tsv.fixed_TS_Oct2018.so_RAW.txt	hydroxytetradecenoylcarnitine	C14:1-OH	0.001	0.30856	3.34358e-05	934	MetaAnalysis_C14.1_HetISqLt75_HetDfGt0_HWEPValGt1EMinus6.tsv.fixed	Lipid	Long chain fatty acid	Draaisma	1825	HMDB0253296	5391	0.397848	No	No	No
212		hydroxytetradecenoylcarnitine	C14:1-OH	0.05	0.000326143	0.00155338	24958	MetaAnalysis_C14.1_HetISqLt75_HetDfGt0_HWEPValGt1EMinus6.tsv.fixed	Lipid	Long chain fatty acid	Draaisma	1825	HMDB0253296	469	0.00483373	Yes	Yes	No
213		hydroxytetradecenoylcarnitine	C14:1-OH	0.1	0.00182085	0.00113038	44036	MetaAnalysis_C14.1_HetISqLt75_HetDfGt0_HWEPValGt1EMinus6.tsv.fixed	Lipid	Long chain fatty acid	Draaisma	1825	HMDB0253296	811	0.0156063	Yes	No	No
214		hydroxytetradecenoylcarnitine	C14:1-OH	0.2	0.00211698	0.0010938	76943	MetaAnalysis_C14.1_HetISqLt75_HetDfGt0_HWEPValGt1EMinus6.tsv.fixed	Lipid	Long chain fatty acid	Draaisma	1825	HMDB0253296	855	0.0172107	Yes	No	No
215		hydroxytetradecenoylcarnitine	C14:1-OH	0.3	0.00339506	0.00097981	105513	MetaAnalysis_C14.1_HetISqLt75_HetDfGt0_HWEPValGt1EMinus6.tsv.fixed	Lipid	Long chain fatty acid	Draaisma	1825	HMDB0253296	993	0.0237654	Yes	No	No
216		hydroxytetradecenoylcarnitine	C14:1-OH	0.4	0.0033685	0.000981696	130963	MetaAnalysis_C14.1_HetISqLt75_HetDfGt0_HWEPValGt1EMinus6.tsv.fixed	Lipid	Long chain fatty acid	Draaisma	1825	HMDB0253296	991	0.0236271	Yes	No	No
217		hydroxytetradecenoylcarnitine	C14:1-OH	0.5	0.00168932	0.00114861	153367	MetaAnalysis_C14.1_HetISqLt75_HetDfGt0_HWEPValGt1EMinus6.tsv.fixed	Lipid	Long chain fatty acid	Draaisma	1825	HMDB0253296	787	0.0149206	Yes	No	No
218	normres_lactate_imputed_complete_CHARGE.csv_TS_Oct2018.so_RAW.txt	lactate	Lac	0.001	0.306244	0.00017632	942	normres_lactate_imputed_complete_CHARGE.csv	Carbohydrate	Glycolysis, Gluconeogenesis, and Pyruvate Metabolism	Rhee	1455	HMDB0000190	5374	0.396111	No	No	No
219		lactate	Lac	0.05	0.16409	0.000656876	25642	normres_lactate_imputed_complete_CHARGE.csv	Carbohydrate	Glycolysis, Gluconeogenesis, and Pyruvate Metabolism	Rhee	1455	HMDB0000190	4053	0.281418	No	No	No
220		lactate	Lac	0.1	0.322427	0.000146004	45470	normres_lactate_imputed_complete_CHARGE.csv	Carbohydrate	Glycolysis, Gluconeogenesis, and Pyruvate Metabolism	Rhee	1455	HMDB0000190	5512	0.406601	No	No	No
221		lactate	Lac	0.2	0.4774	2.20802e-06	79787	normres_lactate_imputed_complete_CHARGE.csv	Carbohydrate	Glycolysis, Gluconeogenesis, and Pyruvate Metabolism	Rhee	1455	HMDB0000190	6789	0.488792	No	No	No
222		lactate	Lac	0.3	0.367227	7.90763e-05	109791	normres_lactate_imputed_complete_CHARGE.csv	Carbohydrate	Glycolysis, Gluconeogenesis, and Pyruvate Metabolism	Rhee	1455	HMDB0000190	5903	0.432424	No	No	No
223		lactate	Lac	0.4	0.476955	2.29598e-06	136592	normres_lactate_imputed_complete_CHARGE.csv	Carbohydrate	Glycolysis, Gluconeogenesis, and Pyruvate Metabolism	Rhee	1455	HMDB0000190	6785	0.488624	No	No	No
224		lactate	Lac	0.5	0.419364	2.84672e-05	160350	normres_lactate_imputed_complete_CHARGE.csv	Carbohydrate	Glycolysis, Gluconeogenesis, and Pyruvate Metabolism	Rhee	1455	HMDB0000190	6327	0.460724	No	No	No
225	MetaAnalysis_PC.ae.C36.0_HetISqLt75_HetDfGt0_HWEPValGt1EMinus6.tsv.fixed_TS_Oct2018.so_RAW.txt	phosphatidylcholine acyl-alkyl c36:0	PC ae C36:0	0.001	0.260082	5.53329e-05	930	MetaAnalysis_PC.ae.C36.0_HetISqLt75_HetDfGt0_HWEPValGt1EMinus6.tsv.fixed	Lipid	Glycerophospholipids	Draaisma	7474	#N/A	4962	0.364335	No	No	No
226		phosphatidylcholine acyl-alkyl c36:0	PC ae C36:0	0.05	0.460813	1.29514e-06	24932	MetaAnalysis_PC.ae.C36.0_HetISqLt75_HetDfGt0_HWEPValGt1EMinus6.tsv.fixed	Lipid	Glycerophospholipids	Draaisma	7474	#N/A	6669	0.480298	No	No	No
227		phosphatidylcholine acyl-alkyl c36:0	PC ae C36:0	0.1	0.359522	1.73147e-05	44010	MetaAnalysis_PC.ae.C36.0_HetISqLt75_HetDfGt0_HWEPValGt1EMinus6.tsv.fixed	Lipid	Glycerophospholipids	Draaisma	7474	#N/A	5836	0.42821	No	No	No
228		phosphatidylcholine acyl-alkyl c36:0	PC ae C36:0	0.2	0.318267	2.98768e-05	76932	MetaAnalysis_PC.ae.C36.0_HetISqLt75_HetDfGt0_HWEPValGt1EMinus6.tsv.fixed	Lipid	Glycerophospholipids	Draaisma	7474	#N/A	5478	0.403848	No	No	No
229		phosphatidylcholine acyl-alkyl c36:0	PC ae C36:0	0.3	0.336074	2.39628e-05	105506	MetaAnalysis_PC.ae.C36.0_HetISqLt75_HetDfGt0_HWEPValGt1EMinus6.tsv.fixed	Lipid	Glycerophospholipids	Draaisma	7474	#N/A	5650	0.41346	No	No	No
230		phosphatidylcholine acyl-alkyl c36:0	PC ae C36:0	0.4	0.441528	2.89504e-06	130932	MetaAnalysis_PC.ae.C36.0_HetISqLt75_HetDfGt0_HWEPValGt1EMinus6.tsv.fixed	Lipid	Glycerophospholipids	Draaisma	7474	#N/A	6509	0.47151	No	No	No
231		phosphatidylcholine acyl-alkyl c36:0	PC ae C36:0	0.5	0.472407	6.4108e-07	153345	MetaAnalysis_PC.ae.C36.0_HetISqLt75_HetDfGt0_HWEPValGt1EMinus6.tsv.fixed	Lipid	Glycerophospholipids	Draaisma	7474	#N/A	6751	0.486402	No	No	No
232	M32634	X-11317	X-11317	0.001	0.058881	0.000332305	856	M32634.metal.pos.txt	Unknown	Unknown	Shin	7362	#N/A	2707	0.151194	No	No	No
233		X-11317	X-11317	0.05	0.0411106	0.00041019	22466	M32634.metal.pos.txt	Unknown	Unknown	Shin	7362	#N/A	2337	0.122276	No	No	No
234		X-11317	X-11317	0.1	0.150601	0.000145176	39529	M32634.metal.pos.txt	Unknown	Unknown	Shin	7362	#N/A	3912	0.267594	No	No	No
235		X-11317	X-11317	0.2	0.269447	5.12884e-05	68522	M32634.metal.pos.txt	Unknown	Unknown	Shin	7362	#N/A	5044	0.371317	No	No	No
236		X-11317	X-11317	0.3	0.200438	9.58524e-05	93694	M32634.metal.pos.txt	Unknown	Unknown	Shin	7362	#N/A	4422	0.31507	No	No	No
237		X-11317	X-11317	0.4	0.366117	1.59019e-05	115944	M32634.metal.pos.txt	Unknown	Unknown	Shin	7362	#N/A	5894	0.431774	No	No	No
238		X-11317	X-11317	0.5	0.386239	1.13554e-05	135378	M32634.metal.pos.txt	Unknown	Unknown	Shin	7362	#N/A	6050	0.44376	No	No	No
239	M01649	valine	Val	0.001	0.324551	2.81332e-05	856	M01649.metal.pos.txt	Amino acid	Leucine, Isoleucine and Valine Metabolism	Shin	7359	HMDB0000883	5534	0.407653	No	No	No
240		valine	Val	0.05	0.179341	0.000114479	22464	M01649.metal.pos.txt	Amino acid	Leucine, Isoleucine and Valine Metabolism	Shin	7359	HMDB0000883	4204	0.296527	No	No	No
241		valine	Val	0.1	0.281843	4.52991e-05	39528	M01649.metal.pos.txt	Amino acid	Leucine, Isoleucine and Valine Metabolism	Shin	7359	HMDB0000883	5165	0.379301	No	No	No
242		valine	Val	0.2	0.390085	1.05851e-05	68521	M01649.metal.pos.txt	Amino acid	Leucine, Isoleucine and Valine Metabolism	Shin	7359	HMDB0000883	6077	0.446187	No	No	No
243		valine	Val	0.3	0.32721	2.72278e-05	93696	M01649.metal.pos.txt	Amino acid	Leucine, Isoleucine and Valine Metabolism	Shin	7359	HMDB0000883	5559	0.409145	No	No	No
244		valine	Val	0.4	0.26441	5.38997e-05	115947	M01649.metal.pos.txt	Amino acid	Leucine, Isoleucine and Valine Metabolism	Shin	7359	HMDB0000883	4998	0.36773	No	No	No
245		valine	Val	0.5	0.296505	3.8818e-05	135380	M01649.metal.pos.txt	Amino acid	Leucine, Isoleucine and Valine Metabolism	Shin	7359	HMDB0000883	5293	0.389384	No	No	No
246	M00063	cholesterol	cholesterol	0.001	0.0741377	0.000283721	856	M00063.metal.pos.txt	Lipid	Sterol	Shin	7365	HMDB0000067	2935	0.175581	No	No	No
247		cholesterol	cholesterol	0.05	0.0489691	0.000371798	22464	M00063.metal.pos.txt	Lipid	Sterol	Shin	7365	HMDB0000067	2508	0.135719	No	No	No
248		cholesterol	cholesterol	0.1	0.140185	0.000158208	39527	M00063.metal.pos.txt	Lipid	Sterol	Shin	7365	HMDB0000067	3800	0.256428	No	No	No
249		cholesterol	cholesterol	0.2	0.0364857	0.000436413	68520	M00063.metal.pos.txt	Lipid	Sterol	Shin	7365	HMDB0000067	2220	0.11424	No	No	No
250		cholesterol	cholesterol	0.3	0.0108603	0.000715023	93694	M00063.metal.pos.txt	Lipid	Sterol	Shin	7365	HMDB0000067	1448	0.052134	No	No	No
251		cholesterol	cholesterol	0.4	0.0127852	0.0006766	115947	M00063.metal.pos.txt	Lipid	Sterol	Shin	7365	HMDB0000067	1532	0.0580089	No	No	No
252		cholesterol	cholesterol	0.5	0.00945599	0.000747804	135382	M00063.metal.pos.txt	Lipid	Sterol	Shin	7365	HMDB0000067	1384	0.0474918	Yes	No	No
253	normres_hydroxyglutarate_imputed_complete_CHARGE.csv_TS_Oct2018.so_RAW.txt	2-hydroxyglutarate	2-hydroxyglutarate	0.001	0.375189	6.95608e-05	942	normres_hydroxyglutarate_imputed_complete_CHARGE.csv	Lipid	Fatty Acid, Dicarboxylate	Rhee	1455	HMDB0059655	5975	0.436475	No	No	No
254		2-hydroxyglutarate	2-hydroxyglutarate	0.05	0.363039	8.43561e-05	25642	normres_hydroxyglutarate_imputed_complete_CHARGE.csv	Lipid	Fatty Acid, Dicarboxylate	Rhee	1455	HMDB0059655	5862	0.430482	No	No	No
255		2-hydroxyglutarate	2-hydroxyglutarate	0.1	0.303532	0.000181752	45470	normres_hydroxyglutarate_imputed_complete_CHARGE.csv	Lipid	Fatty Acid, Dicarboxylate	Rhee	1455	HMDB0059655	5351	0.394291	No	No	No
256		2-hydroxyglutarate	2-hydroxyglutarate	0.2	0.17431	0.00060358	79787	normres_hydroxyglutarate_imputed_complete_CHARGE.csv	Lipid	Fatty Acid, Dicarboxylate	Rhee	1455	HMDB0059655	4157	0.291467	No	No	No
257		2-hydroxyglutarate	2-hydroxyglutarate	0.3	0.0610988	0.00164053	109791	normres_hydroxyglutarate_imputed_complete_CHARGE.csv	Lipid	Fatty Acid, Dicarboxylate	Rhee	1455	HMDB0059655	2737	0.155169	No	No	No
258		2-hydroxyglutarate	2-hydroxyglutarate	0.4	0.135465	0.000832668	136592	normres_hydroxyglutarate_imputed_complete_CHARGE.csv	Lipid	Fatty Acid, Dicarboxylate	Rhee	1455	HMDB0059655	3738	0.251903	No	No	No
259		2-hydroxyglutarate	2-hydroxyglutarate	0.5	0.124164	0.000915513	160350	normres_hydroxyglutarate_imputed_complete_CHARGE.csv	Lipid	Fatty Acid, Dicarboxylate	Rhee	1455	HMDB0059655	3592	0.240275	No	No	No
260	M33477	erythronate	erythronate	0.001	0.157235	0.000138461	857	M33477.metal.pos.txt	Carbohydrate	Aminosugar Metabolism	Shin	7307	HMDB0000613	3983	0.274402	No	No	No
261		erythronate	erythronate	0.05	0.0087629	0.000771967	22467	M33477.metal.pos.txt	Carbohydrate	Aminosugar Metabolism	Shin	7307	HMDB0000613	1359	0.0448204	Yes	No	No
262		erythronate	erythronate	0.1	0.00644489	0.000845978	39532	M33477.metal.pos.txt	Carbohydrate	Aminosugar Metabolism	Shin	7307	HMDB0000613	1217	0.0368106	Yes	No	No
263		erythronate	erythronate	0.2	0.00488127	0.000913463	68522	M33477.metal.pos.txt	Carbohydrate	Aminosugar Metabolism	Shin	7307	HMDB0000613	1119	0.0303214	Yes	No	No
264		erythronate	erythronate	0.3	0.00226648	0.00110203	93694	M33477.metal.pos.txt	Carbohydrate	Aminosugar Metabolism	Shin	7307	HMDB0000613	877	0.0179639	Yes	No	No
265		erythronate	erythronate	0.4	0.00132142	0.00123626	115942	M33477.metal.pos.txt	Carbohydrate	Aminosugar Metabolism	Shin	7307	HMDB0000613	727	0.0126344	Yes	No	No
266		erythronate	erythronate	0.5	0.000443836	0.00151088	135373	M33477.metal.pos.txt	Carbohydrate	Aminosugar Metabolism	Shin	7307	HMDB0000613	514	0.00600215	Yes	Yes	No
267	M32753	X-09789	X-09789	0.001	0.122102	0.000184344	856	M32753.metal.pos.txt	Unknown	Unknown	Shin	7356	#N/A	3565	0.238073	No	No	No
268		X-09789	X-09789	0.05	0.00193423	0.00113374	22465	M32753.metal.pos.txt	Unknown	Unknown	Shin	7356	#N/A	829	0.0162182	Yes	No	No
269		X-09789	X-09789	0.1	0.014666	0.000645255	39530	M32753.metal.pos.txt	Unknown	Unknown	Shin	7356	#N/A	1593	0.0639944	No	No	No
270		X-09789	X-09789	0.2	0.127693	0.00017584	68522	M32753.metal.pos.txt	Unknown	Unknown	Shin	7356	#N/A	3644	0.243578	No	No	No
271		X-09789	X-09789	0.3	0.299132	3.77401e-05	93698	M32753.metal.pos.txt	Unknown	Unknown	Shin	7356	#N/A	5316	0.391134	No	No	No
272		X-09789	X-09789	0.4	0.446965	2.41678e-06	115950	M32753.metal.pos.txt	Unknown	Unknown	Shin	7356	#N/A	6546	0.474618	No	No	No
273		X-09789	X-09789	0.5	0.480922	3.11114e-07	135387	M32753.metal.pos.txt	Unknown	Unknown	Shin	7356	#N/A	6819	0.490232	No	No	No
274	M33968	5-dodecenoate (12:1n7)	5-dodecenoate (12:1n7)	0.001	0.37268	1.44047e-05	856	M33968.metal.pos.txt	Lipid	Medium Chain Fatty Acid	Shin	7322	HMDB0000529	5961	0.434574	No	No	No
275		5-dodecenoate (12:1n7)	5-dodecenoate (12:1n7)	0.05	0.00631003	0.000849353	22463	M33968.metal.pos.txt	Lipid	Medium Chain Fatty Acid	Shin	7322	HMDB0000529	1208	0.0363088	Yes	No	No
276		5-dodecenoate (12:1n7)	5-dodecenoate (12:1n7)	0.1	0.00151073	0.00120038	39527	M33968.metal.pos.txt	Lipid	Medium Chain Fatty Acid	Shin	7322	HMDB0000529	765	0.0137269	Yes	No	No
277		5-dodecenoate (12:1n7)	5-dodecenoate (12:1n7)	0.2	0.00776266	0.000799442	68519	M33968.metal.pos.txt	Lipid	Medium Chain Fatty Acid	Shin	7322	HMDB0000529	1292	0.0417634	Yes	No	No
278		5-dodecenoate (12:1n7)	5-dodecenoate (12:1n7)	0.3	0.0152469	0.000639133	93692	M33968.metal.pos.txt	Lipid	Medium Chain Fatty Acid	Shin	7322	HMDB0000529	1605	0.0660321	No	No	No
279		5-dodecenoate (12:1n7)	5-dodecenoate (12:1n7)	0.4	0.0316151	0.000471149	115942	M33968.metal.pos.txt	Lipid	Medium Chain Fatty Acid	Shin	7322	HMDB0000529	2084	0.105449	No	No	No
280		5-dodecenoate (12:1n7)	5-dodecenoate (12:1n7)	0.5	0.0411221	0.000412369	135377	M33968.metal.pos.txt	Lipid	Medium Chain Fatty Acid	Shin	7322	HMDB0000529	2338	0.122258	No	No	No
281	Summary_statistics_MAGNETIC_Glc.txt_TS_Oct2018.so_RAW.txt	glucose	Glc	0.001	0.30261	1.08268e-05	2251	Summary_statistics_MAGNETIC_Glc.txt	Carbohydrate	Glycolysis, Gluconeogenesis, and Pyruvate Metabolism	Kettunen	24679	HMDB0000122	5347	0.393387	No	No	No
282		glucose	Glc	0.05	0.333906	7.46265e-06	68865	Summary_statistics_MAGNETIC_Glc.txt	Carbohydrate	Glycolysis, Gluconeogenesis, and Pyruvate Metabolism	Kettunen	24679	HMDB0000122	5629	0.412326	No	No	No
283		glucose	Glc	0.1	0.432301	1.17818e-06	124766	Summary_statistics_MAGNETIC_Glc.txt	Carbohydrate	Glycolysis, Gluconeogenesis, and Pyruvate Metabolism	Kettunen	24679	HMDB0000122	6439	0.466676	No	No	No
284		glucose	Glc	0.2	0.482462	7.83578e-08	224332	Summary_statistics_MAGNETIC_Glc.txt	Carbohydrate	Glycolysis, Gluconeogenesis, and Pyruvate Metabolism	Kettunen	24679	HMDB0000122	6828	0.491153	No	No	No
285		glucose	Glc	0.3	0.449757	6.46104e-07	312244	Summary_statistics_MAGNETIC_Glc.txt	Carbohydrate	Glycolysis, Gluconeogenesis, and Pyruvate Metabolism	Kettunen	24679	HMDB0000122	6572	0.475694	No	No	No
286		glucose	Glc	0.4	0.297424	1.14605e-05	391745	Summary_statistics_MAGNETIC_Glc.txt	Carbohydrate	Glycolysis, Gluconeogenesis, and Pyruvate Metabolism	Kettunen	24679	HMDB0000122	5299	0.390148	No	No	No
287		glucose	Glc	0.5	0.223773	2.33742e-05	462838	Summary_statistics_MAGNETIC_Glc.txt	Carbohydrate	Glycolysis, Gluconeogenesis, and Pyruvate Metabolism	Kettunen	24679	HMDB0000122	4628	0.336095	No	No	No
288	MetaAnalysis_C10.1_HetISqLt75_HetDfGt0_HWEPValGt1EMinus6.tsv.fixed_TS_Oct2018.so_RAW.txt	decenoylcarnitine	C10:1	0.001	0.322664	3.68222e-05	934	MetaAnalysis_C10.1_HetISqLt75_HetDfGt0_HWEPValGt1EMinus6.tsv.fixed	Lipid	Fatty Acid Metabolism(Acyl Carnitine)	Draaisma	5753	HMDB0250918	5514	0.406753	No	No	No
289		decenoylcarnitine	C10:1	0.05	0.00043192	0.00192736	24803	MetaAnalysis_C10.1_HetISqLt75_HetDfGt0_HWEPValGt1EMinus6.tsv.fixed	Lipid	Fatty Acid Metabolism(Acyl Carnitine)	Draaisma	5753	HMDB0250918	510	0.00588682	Yes	Yes	No
290		decenoylcarnitine	C10:1	0.1	0.0152424	0.000813462	43725	MetaAnalysis_C10.1_HetISqLt75_HetDfGt0_HWEPValGt1EMinus6.tsv.fixed	Lipid	Fatty Acid Metabolism(Acyl Carnitine)	Draaisma	5753	HMDB0250918	1604	0.0660534	No	No	No
291		decenoylcarnitine	C10:1	0.2	0.0404969	0.000529122	76458	MetaAnalysis_C10.1_HetISqLt75_HetDfGt0_HWEPValGt1EMinus6.tsv.fixed	Lipid	Fatty Acid Metabolism(Acyl Carnitine)	Draaisma	5753	HMDB0250918	2323	0.121177	No	No	No
292		decenoylcarnitine	C10:1	0.3	0.126773	0.000226579	104842	MetaAnalysis_C10.1_HetISqLt75_HetDfGt0_HWEPValGt1EMinus6.tsv.fixed	Lipid	Fatty Acid Metabolism(Acyl Carnitine)	Draaisma	5753	HMDB0250918	3631	0.242688	No	No	No
293		decenoylcarnitine	C10:1	0.4	0.0841656	0.000329816	130063	MetaAnalysis_C10.1_HetISqLt75_HetDfGt0_HWEPValGt1EMinus6.tsv.fixed	Lipid	Fatty Acid Metabolism(Acyl Carnitine)	Draaisma	5753	HMDB0250918	3079	0.190008	No	No	No
294		decenoylcarnitine	C10:1	0.5	0.0709577	0.000374876	152313	MetaAnalysis_C10.1_HetISqLt75_HetDfGt0_HWEPValGt1EMinus6.tsv.fixed	Lipid	Fatty Acid Metabolism(Acyl Carnitine)	Draaisma	5753	HMDB0250918	2889	0.170726	No	No	No
295	normres_LPC20_3_imputed_complete_CHARGE.csv_TS_Oct2018.so_RAW.txt	LPC 20:3	LPC 20:3	0.001	0.435648	1.46064e-05	942	normres_LPC20_3_imputed_complete_CHARGE.csv	Lipid	Glycerophospholipids	Rhee	1797	#N/A	6462	0.468615	No	No	No
296		LPC 20:3	LPC 20:3	0.05	0.314465	0.000129939	25643	normres_LPC20_3_imputed_complete_CHARGE.csv	Lipid	Glycerophospholipids	Rhee	1797	#N/A	5435	0.402179	No	No	No
297		LPC 20:3	LPC 20:3	0.1	0.278197	0.000192518	45471	normres_LPC20_3_imputed_complete_CHARGE.csv	Lipid	Glycerophospholipids	Rhee	1797	#N/A	5124	0.37739	No	No	No
298		LPC 20:3	LPC 20:3	0.2	0.0857828	0.00103964	79790	normres_LPC20_3_imputed_complete_CHARGE.csv	Lipid	Glycerophospholipids	Rhee	1797	#N/A	3106	0.191976	No	No	No
299		LPC 20:3	LPC 20:3	0.3	0.103492	0.000885752	109794	normres_LPC20_3_imputed_complete_CHARGE.csv	Lipid	Glycerophospholipids	Rhee	1797	#N/A	3324	0.216417	No	No	No
300		LPC 20:3	LPC 20:3	0.4	0.336633	9.89408e-05	136596	normres_LPC20_3_imputed_complete_CHARGE.csv	Lipid	Glycerophospholipids	Rhee	1797	#N/A	5655	0.413782	No	No	No
301		LPC 20:3	LPC 20:3	0.5	0.411226	2.80193e-05	160355	normres_LPC20_3_imputed_complete_CHARGE.csv	Lipid	Glycerophospholipids	Rhee	1797	#N/A	6261	0.456546	No	No	No
302	M34539	X-12855	X-12855	0.001	0.0773835	0.000421708	858	M34539.metal.pos.txt	Unknown	Unknown	Shin	4800	#N/A	2977	0.180683	No	No	No
303		X-12855	X-12855	0.05	0.360012	2.67641e-05	22459	M34539.metal.pos.txt	Unknown	Unknown	Shin	4800	#N/A	5840	0.428501	No	No	No
304		X-12855	X-12855	0.1	0.377118	2.04178e-05	39519	M34539.metal.pos.txt	Unknown	Unknown	Shin	4800	#N/A	5988	0.437766	No	No	No
305		X-12855	X-12855	0.2	0.129648	0.000265071	68517	M34539.metal.pos.txt	Unknown	Unknown	Shin	4800	#N/A	3669	0.245622	No	No	No
306		X-12855	X-12855	0.3	0.226691	0.000117115	93688	M34539.metal.pos.txt	Unknown	Unknown	Shin	4800	#N/A	4662	0.337994	No	No	No
307		X-12855	X-12855	0.4	0.164659	0.000198225	115924	M34539.metal.pos.txt	Unknown	Unknown	Shin	4800	#N/A	4063	0.2817	No	No	No
308		X-12855	X-12855	0.5	0.15599	0.000212952	135354	M34539.metal.pos.txt	Unknown	Unknown	Shin	4800	#N/A	3969	0.273188	No	No	No
309	M01299	tyrosine	Tyr	0.001	0.223888	7.83164e-05	856	M01299.metal.pos.txt	Amino acid	Phenylalanine and Tyrosine Metabolism	Shin	7358	HMDB0000158	4629	0.336195	No	No	No
310		tyrosine	Tyr	0.05	0.290954	4.12004e-05	22462	M01299.metal.pos.txt	Amino acid	Phenylalanine and Tyrosine Metabolism	Shin	7358	HMDB0000158	5239	0.386033	No	No	No
311		tyrosine	Tyr	0.1	0.25853	5.70456e-05	39526	M01299.metal.pos.txt	Amino acid	Phenylalanine and Tyrosine Metabolism	Shin	7358	HMDB0000158	4948	0.363185	No	No	No
312		tyrosine	Tyr	0.2	0.046333	0.000384193	68520	M01299.metal.pos.txt	Amino acid	Phenylalanine and Tyrosine Metabolism	Shin	7358	HMDB0000158	2454	0.131239	No	No	No
313		tyrosine	Tyr	0.3	0.0409661	0.000411189	93696	M01299.metal.pos.txt	Amino acid	Phenylalanine and Tyrosine Metabolism	Shin	7358	HMDB0000158	2336	0.121899	No	No	No
314		tyrosine	Tyr	0.4	0.0347623	0.000447604	115946	M01299.metal.pos.txt	Amino acid	Phenylalanine and Tyrosine Metabolism	Shin	7358	HMDB0000158	2171	0.1113	No	No	No
315		tyrosine	Tyr	0.5	0.0496744	0.000369049	135381	M01299.metal.pos.txt	Amino acid	Phenylalanine and Tyrosine Metabolism	Shin	7358	HMDB0000158	2523	0.136856	No	No	No
316	Summary_statistics_MAGNETIC_FAw3.txt_TS_Oct2018.so_RAW.txt	omegal3,fatty,acids	FAw3	0.001	0.332125	1.39103e-05	2228	Summary_statistics_MAGNETIC_FAw3.txt	Lipid	Lipid ratios	Kettunen	13544	#N/A	5607	0.411735	No	No	No
317		omegal3,fatty,acids	FAw3	0.05	0.21531	4.58605e-05	68138	Summary_statistics_MAGNETIC_FAw3.txt	Lipid	Lipid ratios	Kettunen	13544	#N/A	4550	0.328928	No	No	No
318		omegal3,fatty,acids	FAw3	0.1	0.260751	3.03394e-05	123298	Summary_statistics_MAGNETIC_FAw3.txt	Lipid	Lipid ratios	Kettunen	13544	#N/A	4967	0.364904	No	No	No
319		omegal3,fatty,acids	FAw3	0.2	0.28552	2.36961e-05	221564	Summary_statistics_MAGNETIC_FAw3.txt	Lipid	Lipid ratios	Kettunen	13544	#N/A	5195	0.382031	No	No	No
320		omegal3,fatty,acids	FAw3	0.3	0.297703	2.08195e-05	308319	Summary_statistics_MAGNETIC_FAw3.txt	Lipid	Lipid ratios	Kettunen	13544	#N/A	5301	0.390366	No	No	No
321		omegal3,fatty,acids	FAw3	0.4	0.242355	3.60485e-05	386746	Summary_statistics_MAGNETIC_FAw3.txt	Lipid	Lipid ratios	Kettunen	13544	#N/A	4792	0.351546	No	No	No
322		omegal3,fatty,acids	FAw3	0.5	0.158944	7.36546e-05	456889	Summary_statistics_MAGNETIC_FAw3.txt	Lipid	Lipid ratios	Kettunen	13544	#N/A	3999	0.276274	No	No	No
323	M34359	X-12749	X-12749	0.001	0.0219693	0.000600696	857	M34359.metal.pos.txt	Unknown	Unknown	Shin	6755	#N/A	1839	0.083039	No	No	No
324		X-12749	X-12749	0.05	0.34146	2.47011e-05	22459	M34359.metal.pos.txt	Unknown	Unknown	Shin	6755	#N/A	5689	0.417206	No	No	No
325		X-12749	X-12749	0.1	0.0788497	0.000295463	39514	M34359.metal.pos.txt	Unknown	Unknown	Shin	6755	#N/A	2997	0.182878	No	No	No
326		X-12749	X-12749	0.2	0.0177152	0.000654753	68501	M34359.metal.pos.txt	Unknown	Unknown	Shin	6755	#N/A	1692	0.0727769	No	No	No
327		X-12749	X-12749	0.3	0.00426848	0.00102349	93670	M34359.metal.pos.txt	Unknown	Unknown	Shin	6755	#N/A	1072	0.0276774	Yes	No	No
328		X-12749	X-12749	0.4	0.00472397	0.000996709	115913	M34359.metal.pos.txt	Unknown	Unknown	Shin	6755	#N/A	1106	0.0296892	Yes	No	No
329		X-12749	X-12749	0.5	0.00226645	0.00119203	135339	M34359.metal.pos.txt	Unknown	Unknown	Shin	6755	#N/A	876	0.0179842	Yes	No	No
330	M15122	glycerol	Glol	0.001	0.064196	0.000314401	856	M15122.metal.pos.txt	Lipid	Glycerolipid Metabolism	Shin	7352	HMDB0000131	2795	0.159652	No	No	No
331		glycerol	Glol	0.05	0.000741638	0.00137273	22464	M15122.metal.pos.txt	Lipid	Glycerolipid Metabolism	Shin	7352	HMDB0000131	609	0.0084649	Yes	Yes	No
332		glycerol	Glol	0.1	0.00189136	0.00113989	39529	M15122.metal.pos.txt	Lipid	Glycerolipid Metabolism	Shin	7352	HMDB0000131	825	0.0159356	Yes	No	No
333		glycerol	Glol	0.2	0.00402625	0.000954626	68519	M15122.metal.pos.txt	Lipid	Glycerolipid Metabolism	Shin	7352	HMDB0000131	1058	0.0264523	Yes	No	No
334		glycerol	Glol	0.3	0.00122921	0.00124668	93695	M15122.metal.pos.txt	Lipid	Glycerolipid Metabolism	Shin	7352	HMDB0000131	707	0.0120852	Yes	No	No
335		glycerol	Glol	0.4	0.00273754	0.00104888	115948	M15122.metal.pos.txt	Lipid	Glycerolipid Metabolism	Shin	7352	HMDB0000131	931	0.0204389	Yes	No	No
336		glycerol	Glol	0.5	0.00506864	0.000898754	135386	M15122.metal.pos.txt	Lipid	Glycerolipid Metabolism	Shin	7352	HMDB0000131	1131	0.0311513	Yes	No	No
337	M34112	X-12544	X-12544	0.001	0.291097	5.42363e-05	856	M34112.metal.pos.txt	Unknown	Unknown	Shin	5581	#N/A	5242	0.386001	No	No	No
338		X-12544	X-12544	0.05	0.030034	0.000633289	22463	M34112.metal.pos.txt	Unknown	Unknown	Shin	5581	#N/A	2047	0.101987	No	No	No
339		X-12544	X-12544	0.1	0.0274142	0.000660469	39531	M34112.metal.pos.txt	Unknown	Unknown	Shin	5581	#N/A	1985	0.0959981	No	No	No
340		X-12544	X-12544	0.2	0.0491929	0.000489312	68516	M34112.metal.pos.txt	Unknown	Unknown	Shin	5581	#N/A	2515	0.13596	No	No	No
341		X-12544	X-12544	0.3	0.0783373	0.000359375	93692	M34112.metal.pos.txt	Unknown	Unknown	Shin	5581	#N/A	2987	0.182297	No	No	No
342		X-12544	X-12544	0.4	0.0475216	0.000499214	115948	M34112.metal.pos.txt	Unknown	Unknown	Shin	5581	#N/A	2478	0.133302	No	No	No
343		X-12544	X-12544	0.5	0.0582134	0.000441533	135381	M34112.metal.pos.txt	Unknown	Unknown	Shin	5581	#N/A	2690	0.150424	No	No	No
344	M01284	threonine	Thr	0.001	0.164067	0.000168132	856	M01284.metal.pos.txt	Amino acid	Glycine, Serine and Threonine Metabolism	Shin	5687	HMDB0000167	4051	0.281518	No	No	No
345		threonine	Thr	0.05	0.120461	0.000241783	22464	M01284.metal.pos.txt	Amino acid	Glycine, Serine and Threonine Metabolism	Shin	5687	HMDB0000167	3546	0.236133	No	No	No
346		threonine	Thr	0.1	0.199334	0.00012525	39523	M01284.metal.pos.txt	Amino acid	Glycine, Serine and Threonine Metabolism	Shin	5687	HMDB0000167	4406	0.314474	No	No	No
347		threonine	Thr	0.2	0.272546	6.43873e-05	68514	M01284.metal.pos.txt	Amino acid	Glycine, Serine and Threonine Metabolism	Shin	5687	HMDB0000167	5069	0.373736	No	No	No
348		threonine	Thr	0.3	0.268994	6.66907e-05	93682	M01284.metal.pos.txt	Amino acid	Glycine, Serine and Threonine Metabolism	Shin	5687	HMDB0000167	5039	0.371061	No	No	No
349		threonine	Thr	0.4	0.284731	5.68971e-05	115932	M01284.metal.pos.txt	Amino acid	Glycine, Serine and Threonine Metabolism	Shin	5687	HMDB0000167	5188	0.381489	No	No	No
350		threonine	Thr	0.5	0.204651	0.000119709	135361	M01284.metal.pos.txt	Amino acid	Glycine, Serine and Threonine Metabolism	Shin	5687	HMDB0000167	4461	0.318882	No	No	No
351	normres_anthranilic3oh_imputed_complete_CHARGE.csv_TS_Oct2018.so_RAW.txt	3-hydroxyanthranilic acid	3-hydroxyanthranilic acid	0.001	0.0635192	0.00215753	942	normres_anthranilic3oh_imputed_complete_CHARGE.csv	Amino acid	Tryptophan metabolism	Rhee	1078	HMDB0001476	2778	0.158935	No	No	No
352		3-hydroxyanthranilic acid	3-hydroxyanthranilic acid	0.05	0.252012	0.000414065	25641	normres_anthranilic3oh_imputed_complete_CHARGE.csv	Amino acid	Tryptophan metabolism	Rhee	1078	HMDB0001476	4888	0.358374	No	No	No
353		3-hydroxyanthranilic acid	3-hydroxyanthranilic acid	0.1	0.0909175	0.00165222	45468	normres_anthranilic3oh_imputed_complete_CHARGE.csv	Amino acid	Tryptophan metabolism	Rhee	1078	HMDB0001476	3175	0.199045	No	No	No
354		3-hydroxyanthranilic acid	3-hydroxyanthranilic acid	0.2	0.0831868	0.00177516	79783	normres_anthranilic3oh_imputed_complete_CHARGE.csv	Amino acid	Tryptophan metabolism	Rhee	1078	HMDB0001476	3064	0.188718	No	No	No
355		3-hydroxyanthranilic acid	3-hydroxyanthranilic acid	0.3	0.0345718	0.00305954	109784	normres_anthranilic3oh_imputed_complete_CHARGE.csv	Amino acid	Tryptophan metabolism	Rhee	1078	HMDB0001476	2163	0.1111	No	No	No
356		3-hydroxyanthranilic acid	3-hydroxyanthranilic acid	0.4	0.0599942	0.00224004	136581	normres_anthranilic3oh_imputed_complete_CHARGE.csv	Amino acid	Tryptophan metabolism	Rhee	1078	HMDB0001476	2721	0.15326	No	No	No
357		3-hydroxyanthranilic acid	3-hydroxyanthranilic acid	0.5	0.0669757	0.00208141	160340	normres_anthranilic3oh_imputed_complete_CHARGE.csv	Amino acid	Tryptophan metabolism	Rhee	1078	HMDB0001476	2828	0.164621	No	No	No
358	M32418	myristoleate (14:1n5)	myristoleate (14:1n5)	0.001	0.323955	2.83537e-05	856	M32418.metal.pos.txt	Lipid	Long Chain Fatty Acid	Shin	7355	HMDB0002000	5523	0.407716	No	No	No
359		myristoleate (14:1n5)	myristoleate (14:1n5)	0.05	0.0445115	0.000393118	22465	M32418.metal.pos.txt	Lipid	Long Chain Fatty Acid	Shin	7355	HMDB0002000	2413	0.128222	No	No	No
360		myristoleate (14:1n5)	myristoleate (14:1n5)	0.1	0.030357	0.000478168	39529	M32418.metal.pos.txt	Lipid	Long Chain Fatty Acid	Shin	7355	HMDB0002000	2055	0.102682	No	No	No
361		myristoleate (14:1n5)	myristoleate (14:1n5)	0.2	0.125615	0.000178971	68523	M32418.metal.pos.txt	Lipid	Long Chain Fatty Acid	Shin	7355	HMDB0002000	3610	0.24187	No	No	No
362		myristoleate (14:1n5)	myristoleate (14:1n5)	0.3	0.125687	0.000178862	93699	M32418.metal.pos.txt	Lipid	Long Chain Fatty Acid	Shin	7355	HMDB0002000	3613	0.241808	No	No	No
363		myristoleate (14:1n5)	myristoleate (14:1n5)	0.4	0.246711	6.37716e-05	115952	M32418.metal.pos.txt	Lipid	Long Chain Fatty Acid	Shin	7355	HMDB0002000	4834	0.354756	No	No	No
364		myristoleate (14:1n5)	myristoleate (14:1n5)	0.5	0.288191	4.24357e-05	135388	M32418.metal.pos.txt	Lipid	Long Chain Fatty Acid	Shin	7355	HMDB0002000	5223	0.383537	No	No	No
365	MetaAnalysis_C0_HetISqLt75_HetDfGt0_HWEPValGt1EMinus6.tsv.fixed_TS_Oct2018.so_RAW.txt	carnitine	C0	0.001	0.466656	9.36601e-07	933	MetaAnalysis_C0_HetISqLt75_HetDfGt0_HWEPValGt1EMinus6.tsv.fixed	Lipid	Carnitine Metabolism	Draaisma	7476	HMDB0000062	6713	0.483201	No	No	No
366		carnitine	C0	0.05	0.105357	0.000209517	24946	MetaAnalysis_C0_HetISqLt75_HetDfGt0_HWEPValGt1EMinus6.tsv.fixed	Lipid	Carnitine Metabolism	Draaisma	7476	HMDB0000062	3344	0.219	No	No	No
367		carnitine	C0	0.1	0.256789	5.70835e-05	44025	MetaAnalysis_C0_HetISqLt75_HetDfGt0_HWEPValGt1EMinus6.tsv.fixed	Lipid	Carnitine Metabolism	Draaisma	7476	HMDB0000062	4924	0.362499	No	No	No
368		carnitine	C0	0.2	0.295585	3.8592e-05	76933	MetaAnalysis_C0_HetISqLt75_HetDfGt0_HWEPValGt1EMinus6.tsv.fixed	Lipid	Carnitine Metabolism	Draaisma	7476	HMDB0000062	5280	0.389132	No	No	No
369		carnitine	C0	0.3	0.180019	0.000112053	105515	MetaAnalysis_C0_HetISqLt75_HetDfGt0_HWEPValGt1EMinus6.tsv.fixed	Lipid	Carnitine Metabolism	Draaisma	7476	HMDB0000062	4211	0.297154	No	No	No
370		carnitine	C0	0.4	0.12791	0.000172702	130937	MetaAnalysis_C0_HetISqLt75_HetDfGt0_HWEPValGt1EMinus6.tsv.fixed	Lipid	Carnitine Metabolism	Draaisma	7476	HMDB0000062	3648	0.243724	No	No	No
371		carnitine	C0	0.5	0.128777	0.000171449	153366	MetaAnalysis_C0_HetISqLt75_HetDfGt0_HWEPValGt1EMinus6.tsv.fixed	Lipid	Carnitine Metabolism	Draaisma	7476	HMDB0000062	3661	0.244503	No	No	No
372	M18357	glycylvaline	glycylvaline	0.001	0.39855	3.17946e-05	855	M18357.metal.pos.txt	Peptide	Dipeptide	Shin	2079	HMDB0028854	6152	0.450312	No	No	No
373		glycylvaline	glycylvaline	0.05	0.4101	2.48478e-05	22460	M18357.metal.pos.txt	Peptide	Dipeptide	Shin	2079	HMDB0028854	6250	0.456097	No	No	No
374		glycylvaline	glycylvaline	0.1	0.323989	0.000100263	39528	M18357.metal.pos.txt	Peptide	Dipeptide	Shin	2079	HMDB0028854	5525	0.407611	No	No	No
375		glycylvaline	glycylvaline	0.2	0.116532	0.000683777	68508	M18357.metal.pos.txt	Peptide	Dipeptide	Shin	2079	HMDB0028854	3493	0.231897	No	No	No
376		glycylvaline	glycylvaline	0.3	0.116143	0.000686062	93678	M18357.metal.pos.txt	Peptide	Dipeptide	Shin	2079	HMDB0028854	3489	0.231387	No	No	No
377		glycylvaline	glycylvaline	0.4	0.122026	0.000652521	115924	M18357.metal.pos.txt	Peptide	Dipeptide	Shin	2079	HMDB0028854	3563	0.238059	No	No	No
378		glycylvaline	glycylvaline	0.5	0.177656	0.00041088	135336	M18357.metal.pos.txt	Peptide	Dipeptide	Shin	2079	HMDB0028854	4188	0.294863	No	No	No
379	normres_LPE18_1_imputed_complete_CHARGE.csv_TS_Oct2018.so_RAW.txt	LPE 18:1	LPE 18:1	0.001	0.0839689	0.00105746	942	normres_LPE18_1_imputed_complete_CHARGE.csv	Lipid	Glycerophospholipids	Rhee	1797	#N/A	3076	0.189749	No	No	No
380		LPE 18:1	LPE 18:1	0.05	0.0498226	0.00150761	25643	normres_LPE18_1_imputed_complete_CHARGE.csv	Lipid	Glycerophospholipids	Rhee	1797	#N/A	2526	0.137101	No	No	No
381		LPE 18:1	LPE 18:1	0.1	0.0707751	0.00120185	45471	normres_LPE18_1_imputed_complete_CHARGE.csv	Lipid	Glycerophospholipids	Rhee	1797	#N/A	2885	0.170523	No	No	No
382		LPE 18:1	LPE 18:1	0.2	0.134505	0.000679674	79790	normres_LPE18_1_imputed_complete_CHARGE.csv	Lipid	Glycerophospholipids	Rhee	1797	#N/A	3725	0.250992	No	No	No
383		LPE 18:1	LPE 18:1	0.3	0.163256	0.000535575	109794	normres_LPE18_1_imputed_complete_CHARGE.csv	Lipid	Glycerophospholipids	Rhee	1797	#N/A	4043	0.28068	No	No	No
384		LPE 18:1	LPE 18:1	0.4	0.294006	0.000163292	136596	normres_LPE18_1_imputed_complete_CHARGE.csv	Lipid	Glycerophospholipids	Rhee	1797	#N/A	5263	0.388302	No	No	No
385		LPE 18:1	LPE 18:1	0.5	0.334643	0.000101519	160355	normres_LPE18_1_imputed_complete_CHARGE.csv	Lipid	Glycerophospholipids	Rhee	1797	#N/A	5636	0.412722	No	No	No
386	M15958	phenylacetate	phenylacetate	0.001	0.0194762	0.000938947	856	M15958.metal.pos.txt	Amino acid	Phenylalanine and Tyrosine Metabolism	Shin	4538	HMDB0000209	1743	0.07767	No	No	No
387		phenylacetate	phenylacetate	0.05	0.00717835	0.00131992	22449	M15958.metal.pos.txt	Amino acid	Phenylalanine and Tyrosine Metabolism	Shin	4538	HMDB0000209	1265	0.039444	Yes	No	No
388		phenylacetate	phenylacetate	0.1	0.0132674	0.00108377	39516	M15958.metal.pos.txt	Amino acid	Phenylalanine and Tyrosine Metabolism	Shin	4538	HMDB0000209	1545	0.0596904	No	No	No
389		phenylacetate	phenylacetate	0.2	0.0101608	0.00118574	68491	M15958.metal.pos.txt	Amino acid	Phenylalanine and Tyrosine Metabolism	Shin	4538	HMDB0000209	1416	0.0498781	Yes	No	No
390		phenylacetate	phenylacetate	0.3	0.00502317	0.00145919	93659	M15958.metal.pos.txt	Amino acid	Phenylalanine and Tyrosine Metabolism	Shin	4538	HMDB0000209	1126	0.031009	Yes	No	No
391		phenylacetate	phenylacetate	0.4	0.00449715	0.00150261	115899	M15958.metal.pos.txt	Amino acid	Phenylalanine and Tyrosine Metabolism	Shin	4538	HMDB0000209	1086	0.0287842	Yes	No	No
392		phenylacetate	phenylacetate	0.5	0.00450689	0.00150176	135307	M15958.metal.pos.txt	Amino acid	Phenylalanine and Tyrosine Metabolism	Shin	4538	HMDB0000209	1087	0.0288201	Yes	No	No
393	MetaAnalysis_SM.OH.C16.1_HetISqLt75_HetDfGt0_HWEPValGt1EMinus6.tsv.fixed_TS_Oct2018.so_RAW.txt	hydroxysphingomyelin c16:1	SM (OH) C16:1	0.001	0.0269642	0.000568216	934	MetaAnalysis_SM.OH.C16.1_HetISqLt75_HetDfGt0_HWEPValGt1EMinus6.tsv.fixed	Lipid	Sphingolipid Metabolism	Draaisma	6536	HMDB0013463	1971	0.095093	No	No	No
394		hydroxysphingomyelin c16:1	SM (OH) C16:1	0.05	0.190415	0.0001175	24905	MetaAnalysis_SM.OH.C16.1_HetISqLt75_HetDfGt0_HWEPValGt1EMinus6.tsv.fixed	Lipid	Sphingolipid Metabolism	Draaisma	6536	HMDB0013463	4320	0.306382	No	No	No
395		hydroxysphingomyelin c16:1	SM (OH) C16:1	0.1	0.294143	4.48321e-05	43940	MetaAnalysis_SM.OH.C16.1_HetISqLt75_HetDfGt0_HWEPValGt1EMinus6.tsv.fixed	Lipid	Sphingolipid Metabolism	Draaisma	6536	HMDB0013463	5268	0.388115	No	No	No
396		hydroxysphingomyelin c16:1	SM (OH) C16:1	0.2	0.37108	1.65601e-05	76772	MetaAnalysis_SM.OH.C16.1_HetISqLt75_HetDfGt0_HWEPValGt1EMinus6.tsv.fixed	Lipid	Sphingolipid Metabolism	Draaisma	6536	HMDB0013463	5940	0.434238	No	No	No
397		hydroxysphingomyelin c16:1	SM (OH) C16:1	0.3	0.194805	0.000113237	105282	MetaAnalysis_SM.OH.C16.1_HetISqLt75_HetDfGt0_HWEPValGt1EMinus6.tsv.fixed	Lipid	Sphingolipid Metabolism	Draaisma	6536	HMDB0013463	4360	0.31057	No	No	No
398		hydroxysphingomyelin c16:1	SM (OH) C16:1	0.4	0.102812	0.000245069	130632	MetaAnalysis_SM.OH.C16.1_HetISqLt75_HetDfGt0_HWEPValGt1EMinus6.tsv.fixed	Lipid	Sphingolipid Metabolism	Draaisma	6536	HMDB0013463	3318	0.215385	No	No	No
399		hydroxysphingomyelin c16:1	SM (OH) C16:1	0.5	0.151875	0.000161808	152946	MetaAnalysis_SM.OH.C16.1_HetISqLt75_HetDfGt0_HWEPValGt1EMinus6.tsv.fixed	Lipid	Sphingolipid Metabolism	Draaisma	6536	HMDB0013463	3924	0.269032	No	No	No
400	MetaAnalysis_PC.aa.C36.2_HetISqLt75_HetDfGt0_HWEPValGt1EMinus6.tsv.fixed_TS_Oct2018.so_RAW.txt	phosphatidylcholine diacyl c36:2	PC aa C36:2	0.001	0.0793993	0.000265565	937	MetaAnalysis_PC.aa.C36.2_HetISqLt75_HetDfGt0_HWEPValGt1EMinus6.tsv.fixed	Lipid	Glycerophospholipids	Draaisma	7476	#N/A	3004	0.183723	No	No	No
401		phosphatidylcholine diacyl c36:2	PC aa C36:2	0.05	0.14862	0.000145326	24960	MetaAnalysis_PC.aa.C36.2_HetISqLt75_HetDfGt0_HWEPValGt1EMinus6.tsv.fixed	Lipid	Glycerophospholipids	Draaisma	7476	#N/A	3883	0.266046	No	No	No
402		phosphatidylcholine diacyl c36:2	PC aa C36:2	0.1	0.0568476	0.000334627	44024	MetaAnalysis_PC.aa.C36.2_HetISqLt75_HetDfGt0_HWEPValGt1EMinus6.tsv.fixed	Lipid	Glycerophospholipids	Draaisma	7476	#N/A	2661	0.148496	No	No	No
403		phosphatidylcholine diacyl c36:2	PC aa C36:2	0.2	0.0198633	0.000565587	76917	MetaAnalysis_PC.aa.C36.2_HetISqLt75_HetDfGt0_HWEPValGt1EMinus6.tsv.fixed	Lipid	Glycerophospholipids	Draaisma	7476	#N/A	1762	0.0783596	No	No	No
404		phosphatidylcholine diacyl c36:2	PC aa C36:2	0.3	0.0266714	0.000499226	105513	MetaAnalysis_PC.aa.C36.2_HetISqLt75_HetDfGt0_HWEPValGt1EMinus6.tsv.fixed	Lipid	Glycerophospholipids	Draaisma	7476	#N/A	1966	0.0942995	No	No	No
405		phosphatidylcholine diacyl c36:2	PC aa C36:2	0.4	0.0339407	0.000445797	130955	MetaAnalysis_PC.aa.C36.2_HetISqLt75_HetDfGt0_HWEPValGt1EMinus6.tsv.fixed	Lipid	Glycerophospholipids	Draaisma	7476	#N/A	2145	0.109987	No	No	No
406		phosphatidylcholine diacyl c36:2	PC aa C36:2	0.5	0.0490885	0.000365758	153377	MetaAnalysis_PC.aa.C36.2_HetISqLt75_HetDfGt0_HWEPValGt1EMinus6.tsv.fixed	Lipid	Glycerophospholipids	Draaisma	7476	#N/A	2512	0.135834	No	No	No
407	M21630	X-08402	X-08402	0.001	0.378282	1.31929e-05	856	M21630.metal.pos.txt.metal.pos.txt	Unknown	Unknown	Shin	7284	#N/A	5992	0.438825	No	No	No
408		X-08402	X-08402	0.05	0.088936	0.000249188	22466	M21630.metal.pos.txt.metal.pos.txt	Unknown	Unknown	Shin	7284	#N/A	3148	0.196377	No	No	No
409		X-08402	X-08402	0.1	0.0138368	0.000665386	39531	M21630.metal.pos.txt.metal.pos.txt	Unknown	Unknown	Shin	7284	#N/A	1564	0.0614959	No	No	No
410		X-08402	X-08402	0.2	0.0747001	0.000285292	68523	M21630.metal.pos.txt.metal.pos.txt	Unknown	Unknown	Shin	7284	#N/A	2945	0.176313	No	No	No
411		X-08402	X-08402	0.3	0.111875	0.000203187	93694	M21630.metal.pos.txt.metal.pos.txt	Unknown	Unknown	Shin	7284	#N/A	3433	0.226519	No	No	No
412		X-08402	X-08402	0.4	0.0900782	0.000246583	115943	M21630.metal.pos.txt.metal.pos.txt	Unknown	Unknown	Shin	7284	#N/A	3166	0.197768	No	No	No
413		X-08402	X-08402	0.5	0.08396	0.000261006	135375	M21630.metal.pos.txt.metal.pos.txt	Unknown	Unknown	Shin	7284	#N/A	3075	0.189791	No	No	No
414	M12261	taurodeoxycholate	taurodeoxycholate	0.001	0.316565	0.00014765	855	M12261.metal.pos.txt	Lipid	Secondary Bile Acid Metabolism	Shin	1543	HMDB0000896	5461	0.402938	No	No	No
415		taurodeoxycholate	taurodeoxycholate	0.05	0.311962	0.000155782	22460	M12261.metal.pos.txt	Lipid	Secondary Bile Acid Metabolism	Shin	1543	HMDB0000896	5411	0.400748	No	No	No
416		taurodeoxycholate	taurodeoxycholate	0.1	0.328958	0.00012706	39522	M12261.metal.pos.txt	Lipid	Secondary Bile Acid Metabolism	Shin	1543	HMDB0000896	5570	0.410518	No	No	No
417		taurodeoxycholate	taurodeoxycholate	0.2	0.40237	3.96078e-05	68519	M12261.metal.pos.txt	Lipid	Secondary Bile Acid Metabolism	Shin	1543	HMDB0000896	6190	0.451838	No	No	No
418		taurodeoxycholate	taurodeoxycholate	0.3	0.434273	1.77525e-05	93693	M12261.metal.pos.txt	Lipid	Secondary Bile Acid Metabolism	Shin	1543	HMDB0000896	6452	0.46786	No	No	No
419		taurodeoxycholate	taurodeoxycholate	0.4	0.318431	0.00014443	115936	M12261.metal.pos.txt	Lipid	Secondary Bile Acid Metabolism	Shin	1543	HMDB0000896	5482	0.40376	No	No	No
420		taurodeoxycholate	taurodeoxycholate	0.5	0.177392	0.000554784	135375	M12261.metal.pos.txt	Lipid	Secondary Bile Acid Metabolism	Shin	1543	HMDB0000896	4186	0.294566	No	No	No
421	M35628	1-oleoylglycerophosphoethanolamine	lysope c18:1	0.001	0.0117823	0.000701807	856	M35628.metal.pos.txt	Lipid	Glycerophospholipids	Shin	7302	HMDB0011506	1490	0.0549657	No	No	No
422		1-oleoylglycerophosphoethanolamine	lysope c18:1	0.05	0.0445183	0.000395937	22464	M35628.metal.pos.txt	Lipid	Glycerophospholipids	Shin	7302	HMDB0011506	2414	0.128188	No	No	No
423		1-oleoylglycerophosphoethanolamine	lysope c18:1	0.1	0.182865	0.000112035	39532	M35628.metal.pos.txt	Lipid	Glycerophospholipids	Shin	7302	HMDB0011506	4249	0.299151	No	No	No
424		1-oleoylglycerophosphoethanolamine	lysope c18:1	0.2	0.433203	3.87558e-06	68524	M35628.metal.pos.txt	Lipid	Glycerophospholipids	Shin	7302	HMDB0011506	6446	0.467142	No	No	No
425		1-oleoylglycerophosphoethanolamine	lysope c18:1	0.3	0.489917	8.74981e-08	93702	M35628.metal.pos.txt	Lipid	Glycerophospholipids	Shin	7302	HMDB0011506	6880	0.494973	No	No	No
426		1-oleoylglycerophosphoethanolamine	lysope c18:1	0.4	0.447334	2.40063e-06	115955	M35628.metal.pos.txt	Lipid	Glycerophospholipids	Shin	7302	HMDB0011506	6550	0.474721	No	No	No
427		1-oleoylglycerophosphoethanolamine	lysope c18:1	0.5	0.442416	2.8733e-06	135387	M35628.metal.pos.txt	Lipid	Glycerophospholipids	Shin	7302	HMDB0011506	6518	0.471806	No	No	No
428	MetaAnalysis_lysoPC.a.C18.2_HetISqLt75_HetDfGt0_HWEPValGt1EMinus6.tsv.fixed_TS_Oct2018.so_RAW.txt	lysoPhosphatidylcholine acyl C18:2	lysoPC a C18:2	0.001	0.17808	0.000113907	934	MetaAnalysis_lysoPC.a.C18.2_HetISqLt75_HetDfGt0_HWEPValGt1EMinus6.tsv.fixed	Lipid	Glycerophospholipids	Draaisma	7474	#N/A	4192	0.295284	No	No	No
429		lysoPhosphatidylcholine acyl C18:2	lysoPC a C18:2	0.05	0.480054	3.34745e-07	24950	MetaAnalysis_lysoPC.a.C18.2_HetISqLt75_HetDfGt0_HWEPValGt1EMinus6.tsv.fixed	Lipid	Glycerophospholipids	Draaisma	7474	#N/A	6814	0.489705	No	No	No
430		lysoPhosphatidylcholine acyl C18:2	lysoPC a C18:2	0.1	0.303536	3.53836e-05	44030	MetaAnalysis_lysoPC.a.C18.2_HetISqLt75_HetDfGt0_HWEPValGt1EMinus6.tsv.fixed	Lipid	Glycerophospholipids	Draaisma	7474	#N/A	5353	0.394148	No	No	No
431		lysoPhosphatidylcholine acyl C18:2	lysoPC a C18:2	0.2	0.275904	4.7375e-05	76925	MetaAnalysis_lysoPC.a.C18.2_HetISqLt75_HetDfGt0_HWEPValGt1EMinus6.tsv.fixed	Lipid	Glycerophospholipids	Draaisma	7474	#N/A	5101	0.375967	No	No	No
432		lysoPhosphatidylcholine acyl C18:2	lysoPC a C18:2	0.3	0.333304	2.48319e-05	105528	MetaAnalysis_lysoPC.a.C18.2_HetISqLt75_HetDfGt0_HWEPValGt1EMinus6.tsv.fixed	Lipid	Glycerophospholipids	Draaisma	7474	#N/A	5621	0.412168	No	No	No
433		lysoPhosphatidylcholine acyl C18:2	lysoPC a C18:2	0.4	0.436685	3.39864e-06	130949	MetaAnalysis_lysoPC.a.C18.2_HetISqLt75_HetDfGt0_HWEPValGt1EMinus6.tsv.fixed	Lipid	Glycerophospholipids	Draaisma	7474	#N/A	6472	0.469005	No	No	No
434		lysoPhosphatidylcholine acyl C18:2	lysoPC a C18:2	0.5	0.385085	1.14199e-05	153373	MetaAnalysis_lysoPC.a.C18.2_HetISqLt75_HetDfGt0_HWEPValGt1EMinus6.tsv.fixed	Lipid	Glycerophospholipids	Draaisma	7474	#N/A	6042	0.44302	No	No	No
435	SCF.data_TS_Oct2018.so_RAW.txt	Stem cell factor	SCF	0.001	0.416325	5.38597e-06	2031	SCF.data	Cytokine	#N/A	Ahola-Olli	8290	#N/A	6300	0.459345	No	No	No
436		Stem cell factor	SCF	0.05	0.379775	1.13003e-05	60165	SCF.data	Cytokine	#N/A	Ahola-Olli	8290	#N/A	6002	0.439823	No	No	No
437		Stem cell factor	SCF	0.1	0.47082	6.4649e-07	108190	SCF.data	Cytokine	#N/A	Ahola-Olli	8290	#N/A	6738	0.485704	No	No	No
438		Stem cell factor	SCF	0.2	0.352505	1.72872e-05	193092	SCF.data	Cytokine	#N/A	Ahola-Olli	8290	#N/A	5794	0.422897	No	No	No
439		Stem cell factor	SCF	0.3	0.312219	2.89115e-05	267201	SCF.data	Cytokine	#N/A	Ahola-Olli	8290	#N/A	5417	0.400634	No	No	No
440		Stem cell factor	SCF	0.4	0.457915	1.34741e-06	333905	SCF.data	Cytokine	#N/A	Ahola-Olli	8290	#N/A	6642	0.479218	No	No	No
441		Stem cell factor	SCF	0.5	0.44159	2.60445e-06	393376	SCF.data	Cytokine	#N/A	Ahola-Olli	8290	#N/A	6512	0.47136	No	No	No
442	M32838	X-11521	X-11521	0.001	0.365275	1.75634e-05	857	M32838.metal.pos.txt	Unknown	Unknown	Shin	6753	#N/A	5882	0.431661	No	No	No
443		X-11521	X-11521	0.05	0.321238	3.19139e-05	22461	M32838.metal.pos.txt	Unknown	Unknown	Shin	6753	#N/A	5500	0.405987	No	No	No
444		X-11521	X-11521	0.1	0.238685	7.47589e-05	39512	M32838.metal.pos.txt	Unknown	Unknown	Shin	6753	#N/A	4765	0.348184	No	No	No
445		X-11521	X-11521	0.2	0.0518564	0.000391971	68504	M32838.metal.pos.txt	Unknown	Unknown	Shin	6753	#N/A	2561	0.140747	No	No	No
446		X-11521	X-11521	0.3	0.144007	0.000167154	93690	M32838.metal.pos.txt	Unknown	Unknown	Shin	6753	#N/A	3835	0.261014	No	No	No
447		X-11521	X-11521	0.4	0.0987604	0.000245877	115951	M32838.metal.pos.txt	Unknown	Unknown	Shin	6753	#N/A	3260	0.210578	No	No	No
448		X-11521	X-11521	0.5	0.0926974	0.000259679	135373	M32838.metal.pos.txt	Unknown	Unknown	Shin	6753	#N/A	3186	0.202241	No	No	No
449	normres_TAG54_7_PC1_imputed_complete_CHARGE.csv_TS_Oct2018.so_RAW.txt	TAG 54:7	TAG 54:7	0.001	0.0750786	0.0011529	942	normres_TAG54_7_PC1_imputed_complete_CHARGE.csv	Lipid	Triacylglycerol	Rhee	1795	#N/A	2948	0.177026	No	No	No
450		TAG 54:7	TAG 54:7	0.05	0.427937	1.83782e-05	25643	normres_TAG54_7_PC1_imputed_complete_CHARGE.csv	Lipid	Triacylglycerol	Rhee	1795	#N/A	6413	0.463837	No	No	No
451		TAG 54:7	TAG 54:7	0.1	0.376283	5.53674e-05	45471	normres_TAG54_7_PC1_imputed_complete_CHARGE.csv	Lipid	Triacylglycerol	Rhee	1795	#N/A	5979	0.437455	No	No	No
452		TAG 54:7	TAG 54:7	0.2	0.315022	0.000129241	79790	normres_TAG54_7_PC1_imputed_complete_CHARGE.csv	Lipid	Triacylglycerol	Rhee	1795	#N/A	5438	0.402669	No	No	No
453		TAG 54:7	TAG 54:7	0.3	0.221576	0.000327583	109794	normres_TAG54_7_PC1_imputed_complete_CHARGE.csv	Lipid	Triacylglycerol	Rhee	1795	#N/A	4604	0.33453	No	No	No
454		TAG 54:7	TAG 54:7	0.4	0.240055	0.000277739	136596	normres_TAG54_7_PC1_imputed_complete_CHARGE.csv	Lipid	Triacylglycerol	Rhee	1795	#N/A	4772	0.34967	No	No	No
455		TAG 54:7	TAG 54:7	0.5	0.215061	0.000346734	160355	normres_TAG54_7_PC1_imputed_complete_CHARGE.csv	Lipid	Triacylglycerol	Rhee	1795	#N/A	4546	0.328836	No	No	No
456	Summary_statistics_MAGNETIC_XL.VLDL.P.txt_TS_Oct2018.so_RAW.txt	concentration,of,very,large,vldl,particles	XL.VLDL.P	0.001	0.401647	3.27236e-06	2199	Summary_statistics_MAGNETIC_XL.VLDL.P.txt	Lipid	Lipid ratios	Kettunen	18960	#N/A	6183	0.451536	No	No	No
457		concentration,of,very,large,vldl,particles	XL.VLDL.P	0.05	0.32342	1.10709e-05	66907	Summary_statistics_MAGNETIC_XL.VLDL.P.txt	Lipid	Lipid ratios	Kettunen	18960	#N/A	5520	0.407264	No	No	No
458		concentration,of,very,large,vldl,particles	XL.VLDL.P	0.1	0.175472	4.58872e-05	121251	Summary_statistics_MAGNETIC_XL.VLDL.P.txt	Lipid	Lipid ratios	Kettunen	18960	#N/A	4167	0.292706	No	No	No
459		concentration,of,very,large,vldl,particles	XL.VLDL.P	0.2	0.203725	3.61928e-05	218138	Summary_statistics_MAGNETIC_XL.VLDL.P.txt	Lipid	Lipid ratios	Kettunen	18960	#N/A	4443	0.318725	No	No	No
460		concentration,of,very,large,vldl,particles	XL.VLDL.P	0.3	0.257303	2.2399e-05	303455	Summary_statistics_MAGNETIC_XL.VLDL.P.txt	Lipid	Lipid ratios	Kettunen	18960	#N/A	4931	0.362708	No	No	No
461		concentration,of,very,large,vldl,particles	XL.VLDL.P	0.4	0.209555	3.44302e-05	380774	Summary_statistics_MAGNETIC_XL.VLDL.P.txt	Lipid	Lipid ratios	Kettunen	18960	#N/A	4499	0.323765	No	No	No
462		concentration,of,very,large,vldl,particles	XL.VLDL.P	0.5	0.221025	3.11681e-05	449990	Summary_statistics_MAGNETIC_XL.VLDL.P.txt	Lipid	Lipid ratios	Kettunen	18960	#N/A	4601	0.333915	No	No	No
463	normres_glyco_deoxycholates_imputed_complete_CHARGE.csv_TS_Oct2018.so_RAW.txt	glycodeoxycholate; glycochenodeoxycholate	glycodeoxycholate; glycochenodeoxycholate	0.001	0.212969	0.000435556	942	normres_glyco_deoxycholates_imputed_complete_CHARGE.csv	Lipid	Bile Acid Metabolism	Rhee	1455	#N/A	4522	0.327366	No	No	No
464		glycodeoxycholate; glycochenodeoxycholate	glycodeoxycholate; glycochenodeoxycholate	0.05	0.058821	0.00168136	25642	normres_glyco_deoxycholates_imputed_complete_CHARGE.csv	Lipid	Bile Acid Metabolism	Rhee	1455	#N/A	2703	0.151263	No	No	No
465		glycodeoxycholate; glycochenodeoxycholate	glycodeoxycholate; glycochenodeoxycholate	0.1	0.0705681	0.00148723	45470	normres_glyco_deoxycholates_imputed_complete_CHARGE.csv	Lipid	Bile Acid Metabolism	Rhee	1455	#N/A	2883	0.170142	No	No	No
466		glycodeoxycholate; glycochenodeoxycholate	glycodeoxycholate; glycochenodeoxycholate	0.2	0.00376709	0.00489587	79787	normres_glyco_deoxycholates_imputed_complete_CHARGE.csv	Lipid	Bile Acid Metabolism	Rhee	1455	#N/A	1034	0.0253241	Yes	No	No
467		glycodeoxycholate; glycochenodeoxycholate	glycodeoxycholate; glycochenodeoxycholate	0.3	0.0342337	0.00227876	109791	normres_glyco_deoxycholates_imputed_complete_CHARGE.csv	Lipid	Bile Acid Metabolism	Rhee	1455	#N/A	2153	0.110524	No	No	No
468		glycodeoxycholate; glycochenodeoxycholate	glycodeoxycholate; glycochenodeoxycholate	0.4	0.0242947	0.00266961	136592	normres_glyco_deoxycholates_imputed_complete_CHARGE.csv	Lipid	Bile Acid Metabolism	Rhee	1455	#N/A	1908	0.0885076	No	No	No
469		glycodeoxycholate; glycochenodeoxycholate	glycodeoxycholate; glycochenodeoxycholate	0.5	0.0174044	0.00305685	160350	normres_glyco_deoxycholates_imputed_complete_CHARGE.csv	Lipid	Bile Acid Metabolism	Rhee	1455	#N/A	1679	0.0720534	No	No	No
470	M01604	urate	urate	0.001	0.171973	0.000121505	856	M01604.metal.pos.txt	Nucleotide	Purine Metabolism, (Hypo)Xanthine/Inosine containing	Shin	7371	HMDB0000289	4132	0.2893	No	No	No
471		urate	urate	0.05	0.0298788	0.000480701	22465	M01604.metal.pos.txt	Nucleotide	Purine Metabolism, (Hypo)Xanthine/Inosine containing	Shin	7371	HMDB0000289	2043	0.101658	No	No	No
472		urate	urate	0.1	0.0319303	0.000465795	39529	M01604.metal.pos.txt	Nucleotide	Purine Metabolism, (Hypo)Xanthine/Inosine containing	Shin	7371	HMDB0000289	2091	0.106144	No	No	No
473		urate	urate	0.2	0.0039107	0.000959236	68523	M01604.metal.pos.txt	Nucleotide	Purine Metabolism, (Hypo)Xanthine/Inosine containing	Shin	7371	HMDB0000289	1049	0.0259135	Yes	No	No
474		urate	urate	0.3	0.000963959	0.00130385	93696	M01604.metal.pos.txt	Nucleotide	Purine Metabolism, (Hypo)Xanthine/Inosine containing	Shin	7371	HMDB0000289	660	0.0101522	Yes	No	No
475		urate	urate	0.4	0.000157636	0.00175905	115948	M01604.metal.pos.txt	Nucleotide	Purine Metabolism, (Hypo)Xanthine/Inosine containing	Shin	7371	HMDB0000289	369	0.00296945	Yes	Yes	No
476		urate	urate	0.5	5.75647e-05	0.00201544	135384	M01604.metal.pos.txt	Nucleotide	Purine Metabolism, (Hypo)Xanthine/Inosine containing	Shin	7371	HMDB0000289	243	0.00164663	Yes	Yes	No
477	M32758	X-11441	X-11441	0.001	0.264425	5.97095e-05	856	M32758.metal.pos.txt	Unknown	Unknown	Shin	6642	#N/A	5000	0.367603	No	No	No
478		X-11441	X-11441	0.05	0.225153	8.57957e-05	22463	M32758.metal.pos.txt	Unknown	Unknown	Shin	6642	#N/A	4649	0.33664	No	No	No
479		X-11441	X-11441	0.1	0.30605	3.87117e-05	39529	M32758.metal.pos.txt	Unknown	Unknown	Shin	6642	#N/A	5372	0.396008	No	No	No
480		X-11441	X-11441	0.2	0.0744775	0.000313549	68524	M32758.metal.pos.txt	Unknown	Unknown	Shin	6642	#N/A	2939	0.176146	No	No	No
481		X-11441	X-11441	0.3	0.12478	0.000199583	93698	M32758.metal.pos.txt	Unknown	Unknown	Shin	6642	#N/A	3596	0.241198	No	No	No
482		X-11441	X-11441	0.4	0.0648489	0.000345637	115952	M32758.metal.pos.txt	Unknown	Unknown	Shin	6642	#N/A	2805	0.160701	No	No	No
483		X-11441	X-11441	0.5	0.0423159	0.000447601	135387	M32758.metal.pos.txt	Unknown	Unknown	Shin	6642	#N/A	2372	0.124004	No	No	No
484	M32388	dodecanedioate	dodecanedioate	0.001	0.323371	3.46239e-05	855	M32388.metal.pos.txt	Lipid	Fatty Acid, Dicarboxylate	Shin	6066	HMDB0000623	5518	0.407349	No	No	No
485		dodecanedioate	dodecanedioate	0.05	0.00444189	0.00112796	22455	M32388.metal.pos.txt	Lipid	Fatty Acid, Dicarboxylate	Shin	6066	HMDB0000623	1083	0.0285093	Yes	No	No
486		dodecanedioate	dodecanedioate	0.1	0.00148235	0.00145444	39510	M32388.metal.pos.txt	Lipid	Fatty Acid, Dicarboxylate	Shin	6066	HMDB0000623	760	0.0135577	Yes	No	No
487		dodecanedioate	dodecanedioate	0.2	0.000324969	0.00191495	68512	M32388.metal.pos.txt	Lipid	Fatty Acid, Dicarboxylate	Shin	6066	HMDB0000623	466	0.00484734	Yes	Yes	No
488		dodecanedioate	dodecanedioate	0.3	0.000183172	0.00209087	93688	M32388.metal.pos.txt	Lipid	Fatty Acid, Dicarboxylate	Shin	6066	HMDB0000623	386	0.00329852	Yes	Yes	No
489		dodecanedioate	dodecanedioate	0.4	1.96251e-05	0.00278334	115935	M32388.metal.pos.txt	Lipid	Fatty Acid, Dicarboxylate	Shin	6066	HMDB0000623	157	0.000868879	Yes	Yes	No
490		dodecanedioate	dodecanedioate	0.5	3.40496e-05	0.00261164	135357	M32388.metal.pos.txt	Lipid	Fatty Acid, Dicarboxylate	Shin	6066	HMDB0000623	203	0.00116591	Yes	Yes	No
491	M16821	X-04498	X-04498	0.001	0.410566	7.5918e-06	856	M16821.metal.pos.txt	Unknown	Unknown	Shin	6733	#N/A	6255	0.456251	No	No	No
492		X-04498	X-04498	0.05	0.123727	0.000198647	22459	M16821.metal.pos.txt	Unknown	Unknown	Shin	6733	#N/A	3586	0.239828	No	No	No
493		X-04498	X-04498	0.1	0.058178	0.000366144	39513	M16821.metal.pos.txt	Unknown	Unknown	Shin	6733	#N/A	2689	0.150389	No	No	No
494		X-04498	X-04498	0.2	0.0947838	0.00025557	68507	M16821.metal.pos.txt	Unknown	Unknown	Shin	6733	#N/A	3206	0.205503	No	No	No
495		X-04498	X-04498	0.3	0.0686356	0.000327926	93687	M16821.metal.pos.txt	Unknown	Unknown	Shin	6733	#N/A	2853	0.167223	No	No	No
496		X-04498	X-04498	0.4	0.0318117	0.000510833	115940	M16821.metal.pos.txt	Unknown	Unknown	Shin	6733	#N/A	2089	0.105851	No	No	No
497		X-04498	X-04498	0.5	0.0236893	0.000583803	135367	M16821.metal.pos.txt	Unknown	Unknown	Shin	6733	#N/A	1885	0.0873549	No	No	No
498	M33140	X-11795	X-11795	0.001	0.446498	2.47223e-06	856	M33140.metal.pos.txt	Unknown	Unknown	Shin	7319	#N/A	6542	0.474412	No	No	No
499		X-11795	X-11795	0.05	0.418336	5.80656e-06	22464	M33140.metal.pos.txt	Unknown	Unknown	Shin	7319	#N/A	6317	0.460322	No	No	No
500		X-11795	X-11795	0.1	0.44142	2.96734e-06	39528	M33140.metal.pos.txt	Unknown	Unknown	Shin	7319	#N/A	6507	0.47154	No	No	No
501		X-11795	X-11795	0.2	0.109702	0.000206054	68522	M33140.metal.pos.txt	Unknown	Unknown	Shin	7319	#N/A	3398	0.224408	No	No	No
502		X-11795	X-11795	0.3	0.104938	0.000214799	93697	M33140.metal.pos.txt	Unknown	Unknown	Shin	7319	#N/A	3339	0.218456	No	No	No
503		X-11795	X-11795	0.4	0.181701	0.000112865	115948	M33140.metal.pos.txt	Unknown	Unknown	Shin	7319	#N/A	4235	0.298229	No	No	No
504		X-11795	X-11795	0.5	0.247065	6.38755e-05	135383	M33140.metal.pos.txt	Unknown	Unknown	Shin	7319	#N/A	4839	0.354898	No	No	No
505	Summary_statistics_MAGNETIC_L.VLDL.P.txt_TS_Oct2018.so_RAW.txt	concentration,of,large,vldl,particles	L.VLDL.P	0.001	0.388665	4.21814e-06	2242	Summary_statistics_MAGNETIC_L.VLDL.P.txt	Lipid	Lipid ratios	Kettunen	18960	#N/A	6068	0.445222	No	No	No
506		concentration,of,large,vldl,particles	L.VLDL.P	0.05	0.286091	1.68272e-05	68532	Summary_statistics_MAGNETIC_L.VLDL.P.txt	Lipid	Lipid ratios	Kettunen	18960	#N/A	5201	0.382352	No	No	No
507		concentration,of,large,vldl,particles	L.VLDL.P	0.1	0.100419	8.62977e-05	124114	Summary_statistics_MAGNETIC_L.VLDL.P.txt	Lipid	Lipid ratios	Kettunen	18960	#N/A	3281	0.212743	No	No	No
508		concentration,of,large,vldl,particles	L.VLDL.P	0.2	0.204444	3.59716e-05	223075	Summary_statistics_MAGNETIC_L.VLDL.P.txt	Lipid	Lipid ratios	Kettunen	18960	#N/A	4457	0.318844	No	No	No
509		concentration,of,large,vldl,particles	L.VLDL.P	0.3	0.200958	3.70556e-05	310425	Summary_statistics_MAGNETIC_L.VLDL.P.txt	Lipid	Lipid ratios	Kettunen	18960	#N/A	4426	0.315603	No	No	No
510		concentration,of,large,vldl,particles	L.VLDL.P	0.4	0.14713	5.80166e-05	389437	Summary_statistics_MAGNETIC_L.VLDL.P.txt	Lipid	Lipid ratios	Kettunen	18960	#N/A	3865	0.264606	No	No	No
511		concentration,of,large,vldl,particles	L.VLDL.P	0.5	0.196169	3.85902e-05	460137	Summary_statistics_MAGNETIC_L.VLDL.P.txt	Lipid	Lipid ratios	Kettunen	18960	#N/A	4372	0.311887	No	No	No
512	M15488	acetylphosphate	acetylphosphate	0.001	0.144934	0.000152505	856	M15488.metal.pos.txt	Energy	Oxidative Phosphorylation	Shin	7345	HMDB0001494	3848	0.261808	No	No	No
513		acetylphosphate	acetylphosphate	0.05	0.0738102	0.000285415	22463	M15488.metal.pos.txt	Energy	Oxidative Phosphorylation	Shin	7345	HMDB0001494	2928	0.175224	No	No	No
514		acetylphosphate	acetylphosphate	0.1	0.0113893	0.000705717	39526	M15488.metal.pos.txt	Energy	Oxidative Phosphorylation	Shin	7345	HMDB0001494	1474	0.0537087	No	No	No
515		acetylphosphate	acetylphosphate	0.2	0.000843536	0.00134181	68519	M15488.metal.pos.txt	Energy	Oxidative Phosphorylation	Shin	7345	HMDB0001494	638	0.00919031	Yes	Yes	No
516		acetylphosphate	acetylphosphate	0.3	0.000159994	0.0017615	93693	M15488.metal.pos.txt	Energy	Oxidative Phosphorylation	Shin	7345	HMDB0001494	370	0.00300573	Yes	Yes	No
517		acetylphosphate	acetylphosphate	0.4	0.000309989	0.00159369	115943	M15488.metal.pos.txt	Energy	Oxidative Phosphorylation	Shin	7345	HMDB0001494	458	0.00470466	Yes	Yes	No
518		acetylphosphate	acetylphosphate	0.5	0.00055075	0.00144873	135380	M15488.metal.pos.txt	Energy	Oxidative Phosphorylation	Shin	7345	HMDB0001494	543	0.00705021	Yes	Yes	No
519	normres_SM22_1_imputed_complete_CHARGE.csv_TS_Oct2018.so_RAW.txt	SM 22:1	SM 22:1	0.001	0.0570619	0.00138811	942	normres_SM22_1_imputed_complete_CHARGE.csv	Lipid	Sphingolipid Metabolism	Rhee	1797	#N/A	2668	0.148665	No	No	No
520		SM 22:1	SM 22:1	0.05	8.8784e-05	0.00779071	25643	normres_SM22_1_imputed_complete_CHARGE.csv	Lipid	Sphingolipid Metabolism	Rhee	1797	#N/A	297	0.0020779	Yes	Yes	No
521		SM 22:1	SM 22:1	0.1	0.000380739	0.0062867	45471	normres_SM22_1_imputed_complete_CHARGE.csv	Lipid	Sphingolipid Metabolism	Rhee	1797	#N/A	489	0.0054121	Yes	Yes	No
522		SM 22:1	SM 22:1	0.2	0.000261542	0.00667297	79790	normres_SM22_1_imputed_complete_CHARGE.csv	Lipid	Sphingolipid Metabolism	Rhee	1797	#N/A	435	0.00417926	Yes	Yes	No
523		SM 22:1	SM 22:1	0.3	0.000722382	0.00563114	109794	normres_SM22_1_imputed_complete_CHARGE.csv	Lipid	Sphingolipid Metabolism	Rhee	1797	#N/A	606	0.00828594	Yes	Yes	No
524		SM 22:1	SM 22:1	0.4	0.00119275	0.00512117	136596	normres_SM22_1_imputed_complete_CHARGE.csv	Lipid	Sphingolipid Metabolism	Rhee	1797	#N/A	702	0.0118103	Yes	No	No
525		SM 22:1	SM 22:1	0.5	0.000918464	0.00538652	160355	normres_SM22_1_imputed_complete_CHARGE.csv	Lipid	Sphingolipid Metabolism	Rhee	1797	#N/A	650	0.00982191	Yes	Yes	No
526	M32854	X-11537	X-11537	0.001	0.230719	0.000202068	856	M32854.metal.pos.txt	Unknown	Unknown	Shin	2684	#N/A	4703	0.341001	No	No	No
527		X-11537	X-11537	0.05	0.191153	0.00028434	22464	M32854.metal.pos.txt	Unknown	Unknown	Shin	2684	#N/A	4326	0.307143	No	No	No
528		X-11537	X-11537	0.1	0.252419	0.000165691	39526	M32854.metal.pos.txt	Unknown	Unknown	Shin	2684	#N/A	4893	0.358587	No	No	No
529		X-11537	X-11537	0.2	0.266255	0.000145146	68522	M32854.metal.pos.txt	Unknown	Unknown	Shin	2684	#N/A	5013	0.369187	No	No	No
530		X-11537	X-11537	0.3	0.159625	0.000369535	93698	M32854.metal.pos.txt	Unknown	Unknown	Shin	2684	#N/A	4006	0.276973	No	No	No
531		X-11537	X-11537	0.4	0.16236	0.000361277	115953	M32854.metal.pos.txt	Unknown	Unknown	Shin	2684	#N/A	4029	0.28011	No	No	No
532		X-11537	X-11537	0.5	0.204145	0.000254726	135389	M32854.metal.pos.txt	Unknown	Unknown	Shin	2684	#N/A	4452	0.318736	No	No	No
533	normres_trimethylamine_imputed_complete_CHARGE.csv_TS_Oct2018.so_RAW.txt	trimethylamine-N-oxide	TMAO	0.001	0.0813067	0.00108141	942	normres_trimethylamine_imputed_complete_CHARGE.csv	Lipid	Phospholipid metabolism	Rhee	1802	HMDB0000925	3035	0.186215	No	No	No
534		trimethylamine-N-oxide	TMAO	0.05	0.426245	1.91865e-05	25643	normres_trimethylamine_imputed_complete_CHARGE.csv	Lipid	Phospholipid metabolism	Rhee	1802	HMDB0000925	6400	0.462942	No	No	No
535		trimethylamine-N-oxide	TMAO	0.1	0.371594	5.95678e-05	45471	normres_trimethylamine_imputed_complete_CHARGE.csv	Lipid	Phospholipid metabolism	Rhee	1802	HMDB0000925	5943	0.434621	No	No	No
536		trimethylamine-N-oxide	TMAO	0.2	0.316062	0.00012718	79790	normres_trimethylamine_imputed_complete_CHARGE.csv	Lipid	Phospholipid metabolism	Rhee	1802	HMDB0000925	5455	0.40274	No	No	No
537		trimethylamine-N-oxide	TMAO	0.3	0.219899	0.000331137	109794	normres_trimethylamine_imputed_complete_CHARGE.csv	Lipid	Phospholipid metabolism	Rhee	1802	HMDB0000925	4592	0.332866	No	No	No
538		trimethylamine-N-oxide	TMAO	0.4	0.25893	0.000232024	136596	normres_trimethylamine_imputed_complete_CHARGE.csv	Lipid	Phospholipid metabolism	Rhee	1802	HMDB0000925	4952	0.363453	No	No	No
539		trimethylamine-N-oxide	TMAO	0.5	0.18405	0.000449437	160355	normres_trimethylamine_imputed_complete_CHARGE.csv	Lipid	Phospholipid metabolism	Rhee	1802	HMDB0000925	4260	0.300313	No	No	No
540	M35255	2-stearoylglycerophosphocholine*	2-stearoylglycerophosphocholine*	0.001	0.258259	5.77189e-05	856	M35255.metal.pos.txt	Lipid	Glycerophospholipids	Shin	7291	HMDB0011128	4942	0.363245	No	No	No
541		2-stearoylglycerophosphocholine*	2-stearoylglycerophosphocholine*	0.05	0.0962714	0.00023287	22463	M35255.metal.pos.txt	Lipid	Glycerophospholipids	Shin	7291	HMDB0011128	3222	0.207692	No	No	No
542		2-stearoylglycerophosphocholine*	2-stearoylglycerophosphocholine*	0.1	0.0189196	0.000591271	39527	M35255.metal.pos.txt	Lipid	Glycerophospholipids	Shin	7291	HMDB0011128	1729	0.0760615	No	No	No
543		2-stearoylglycerophosphocholine*	2-stearoylglycerophosphocholine*	0.2	0.0464252	0.000387286	68521	M35255.metal.pos.txt	Lipid	Glycerophospholipids	Shin	7291	HMDB0011128	2457	0.13134	No	No	No
544		2-stearoylglycerophosphocholine*	2-stearoylglycerophosphocholine*	0.3	0.0144466	0.000654561	93697	M35255.metal.pos.txt	Lipid	Glycerophospholipids	Shin	7291	HMDB0011128	1587	0.0632754	No	No	No
545		2-stearoylglycerophosphocholine*	2-stearoylglycerophosphocholine*	0.4	0.024944	0.000527253	115948	M35255.metal.pos.txt	Lipid	Glycerophospholipids	Shin	7291	HMDB0011128	1932	0.0897442	No	No	No
546		2-stearoylglycerophosphocholine*	2-stearoylglycerophosphocholine*	0.5	0.0412652	0.00041335	135383	M35255.metal.pos.txt	Lipid	Glycerophospholipids	Shin	7291	HMDB0011128	2343	0.122422	No	No	No
547	M34314	X-12704	X-12704	0.001	0.0933476	0.000986775	857	M34314.metal.pos.txt	Unknown	Unknown	Shin	1766	#N/A	3193	0.203213	No	No	No
548		X-12704	X-12704	0.05	0.423318	2.11822e-05	22454	M34314.metal.pos.txt	Unknown	Unknown	Shin	1766	#N/A	6362	0.462509	No	No	No
549		X-12704	X-12704	0.1	0.162603	0.000547921	39525	M34314.metal.pos.txt	Unknown	Unknown	Shin	1766	#N/A	4032	0.280321	No	No	No
550		X-12704	X-12704	0.2	0.120383	0.000778915	68512	M34314.metal.pos.txt	Unknown	Unknown	Shin	1766	#N/A	3544	0.236113	No	No	No
551		X-12704	X-12704	0.3	0.17931	0.000477077	93688	M34314.metal.pos.txt	Unknown	Unknown	Shin	1766	#N/A	4203	0.296546	No	No	No
552		X-12704	X-12704	0.4	0.158564	0.000566517	115923	M34314.metal.pos.txt	Unknown	Unknown	Shin	1766	#N/A	3997	0.275752	No	No	No
553		X-12704	X-12704	0.5	0.224194	0.000325384	135348	M34314.metal.pos.txt	Unknown	Unknown	Shin	1766	#N/A	4631	0.33651	No	No	No
554	M33441	isobutyrylcarnitine	isobutyrylcarnitine	0.001	0.0104451	0.000724236	856	M33441.metal.pos.txt	Amino acid	Leucine, Isoleucine and Valine Metabolism	Shin	7365	HMDB0000736	1426	0.0509144	No	No	No
555		isobutyrylcarnitine	isobutyrylcarnitine	0.05	0.000121249	0.00182715	22465	M33441.metal.pos.txt	Amino acid	Leucine, Isoleucine and Valine Metabolism	Shin	7365	HMDB0000736	334	0.00252336	Yes	Yes	No
556		isobutyrylcarnitine	isobutyrylcarnitine	0.1	0.000242816	0.00165105	39529	M33441.metal.pos.txt	Amino acid	Leucine, Isoleucine and Valine Metabolism	Shin	7365	HMDB0000736	420	0.0040186	Yes	Yes	No
557		isobutyrylcarnitine	isobutyrylcarnitine	0.2	0.00115277	0.00126042	68522	M33441.metal.pos.txt	Amino acid	Leucine, Isoleucine and Valine Metabolism	Shin	7365	HMDB0000736	696	0.0115128	Yes	No	No
558		isobutyrylcarnitine	isobutyrylcarnitine	0.3	0.000650622	0.00140306	93697	M33441.metal.pos.txt	Amino acid	Leucine, Isoleucine and Valine Metabolism	Shin	7365	HMDB0000736	579	0.00781084	Yes	Yes	No
559		isobutyrylcarnitine	isobutyrylcarnitine	0.4	0.000567523	0.00143728	115949	M33441.metal.pos.txt	Amino acid	Leucine, Isoleucine and Valine Metabolism	Shin	7365	HMDB0000736	549	0.00718552	Yes	Yes	No
560		isobutyrylcarnitine	isobutyrylcarnitine	0.5	0.000550545	0.0014449	135385	M33441.metal.pos.txt	Amino acid	Leucine, Isoleucine and Valine Metabolism	Shin	7365	HMDB0000736	542	0.00706059	Yes	Yes	No
561	MetaAnalysis_PC.aa.C40.2_HetISqLt75_HetDfGt0_HWEPValGt1EMinus6.tsv.fixed_TS_Oct2018.so_RAW.txt	phosphatidylcholine diacyl c40:2	PC aa C40:2	0.001	0.219846	7.99067e-05	937	MetaAnalysis_PC.aa.C40.2_HetISqLt75_HetDfGt0_HWEPValGt1EMinus6.tsv.fixed	Lipid	Glycerophospholipids	Draaisma	7472	#N/A	4591	0.332858	No	No	No
562		phosphatidylcholine diacyl c40:2	PC aa C40:2	0.05	0.0250232	0.000513774	24939	MetaAnalysis_PC.aa.C40.2_HetISqLt75_HetDfGt0_HWEPValGt1EMinus6.tsv.fixed	Lipid	Glycerophospholipids	Draaisma	7472	#N/A	1936	0.089843	No	No	No
563		phosphatidylcholine diacyl c40:2	PC aa C40:2	0.1	0.0206953	0.000556583	44027	MetaAnalysis_PC.aa.C40.2_HetISqLt75_HetDfGt0_HWEPValGt1EMinus6.tsv.fixed	Lipid	Glycerophospholipids	Draaisma	7472	#N/A	1800	0.0799185	No	No	No
564		phosphatidylcholine diacyl c40:2	PC aa C40:2	0.2	0.00111622	0.00125027	76943	MetaAnalysis_PC.aa.C40.2_HetISqLt75_HetDfGt0_HWEPValGt1EMinus6.tsv.fixed	Lipid	Glycerophospholipids	Draaisma	7472	#N/A	686	0.0113102	Yes	No	No
565		phosphatidylcholine diacyl c40:2	PC aa C40:2	0.3	0.000228423	0.00164266	105519	MetaAnalysis_PC.aa.C40.2_HetISqLt75_HetDfGt0_HWEPValGt1EMinus6.tsv.fixed	Lipid	Glycerophospholipids	Draaisma	7472	#N/A	405	0.00392042	Yes	Yes	No
566		phosphatidylcholine diacyl c40:2	PC aa C40:2	0.4	0.000120364	0.00180285	130962	MetaAnalysis_PC.aa.C40.2_HetISqLt75_HetDfGt0_HWEPValGt1EMinus6.tsv.fixed	Lipid	Glycerophospholipids	Draaisma	7472	#N/A	333	0.00251246	Yes	Yes	No
567		phosphatidylcholine diacyl c40:2	PC aa C40:2	0.5	0.000232777	0.00163795	153368	MetaAnalysis_PC.aa.C40.2_HetISqLt75_HetDfGt0_HWEPValGt1EMinus6.tsv.fixed	Lipid	Glycerophospholipids	Draaisma	7472	#N/A	408	0.00396577	Yes	Yes	No
568	M33666	X-12244--N-acetylcarnosine	X-12244--N-acetylcarnosine	0.001	0.413768	7.55926e-06	856	M33666.metal.pos.txt	Peptide	Dipeptide	Shin	6279	#N/A	6283	0.457759	No	No	No
569		X-12244--N-acetylcarnosine	X-12244--N-acetylcarnosine	0.05	0.455193	2.01753e-06	22465	M33666.metal.pos.txt	Peptide	Dipeptide	Shin	6279	#N/A	6617	0.478169	No	No	No
570		X-12244--N-acetylcarnosine	X-12244--N-acetylcarnosine	0.1	0.150151	0.000170849	39529	M33666.metal.pos.txt	Peptide	Dipeptide	Shin	6279	#N/A	3906	0.267205	No	No	No
571		X-12244--N-acetylcarnosine	X-12244--N-acetylcarnosine	0.2	0.0616291	0.000378241	68524	M33666.metal.pos.txt	Peptide	Dipeptide	Shin	6279	#N/A	2748	0.155889	No	No	No
572		X-12244--N-acetylcarnosine	X-12244--N-acetylcarnosine	0.3	0.113157	0.000233112	93699	M33666.metal.pos.txt	Peptide	Dipeptide	Shin	6279	#N/A	3445	0.228317	No	No	No
573		X-12244--N-acetylcarnosine	X-12244--N-acetylcarnosine	0.4	0.153712	0.000165891	115949	M33666.metal.pos.txt	Peptide	Dipeptide	Shin	6279	#N/A	3945	0.270836	No	No	No
574		X-12244--N-acetylcarnosine	X-12244--N-acetylcarnosine	0.5	0.129401	0.000203062	135381	M33666.metal.pos.txt	Peptide	Dipeptide	Shin	6279	#N/A	3665	0.24542	No	No	No
575	M36754	octadecanedioate	octadecanedioate	0.001	0.312864	3.45979e-05	857	M36754.metal.pos.txt	Lipid	Fatty Acid, Dicarboxylate	Shin	6876	HMDB0000782	5424	0.400943	No	No	No
576		octadecanedioate	octadecanedioate	0.05	0.098023	0.000243075	22465	M36754.metal.pos.txt	Lipid	Fatty Acid, Dicarboxylate	Shin	6876	HMDB0000782	3253	0.209455	No	No	No
577		octadecanedioate	octadecanedioate	0.1	0.0812561	0.000283656	39529	M36754.metal.pos.txt	Lipid	Fatty Acid, Dicarboxylate	Shin	6876	HMDB0000782	3033	0.186222	No	No	No
578		octadecanedioate	octadecanedioate	0.2	0.111852	0.000215284	68523	M36754.metal.pos.txt	Lipid	Fatty Acid, Dicarboxylate	Shin	6876	HMDB0000782	3432	0.22654	No	No	No
579		octadecanedioate	octadecanedioate	0.3	0.177616	0.000124291	93702	M36754.metal.pos.txt	Lipid	Fatty Acid, Dicarboxylate	Shin	6876	HMDB0000782	4187	0.294868	No	No	No
580		octadecanedioate	octadecanedioate	0.4	0.166119	0.00013672	115949	M36754.metal.pos.txt	Lipid	Fatty Acid, Dicarboxylate	Shin	6876	HMDB0000782	4081	0.282944	No	No	No
581		octadecanedioate	octadecanedioate	0.5	0.209169	9.5251e-05	135383	M36754.metal.pos.txt	Lipid	Fatty Acid, Dicarboxylate	Shin	6876	HMDB0000782	4496	0.323384	No	No	No
582	M33835	X-12407	X-12407	0.001	0.0648559	0.000862767	858	M33835.metal.pos.txt	Unknown	Unknown	Shin	2660	#N/A	2806	0.16066	No	No	No
583		X-12407	X-12407	0.05	0.460907	3.62143e-06	22434	M33835.metal.pos.txt	Unknown	Unknown	Shin	2660	#N/A	6672	0.480181	No	No	No
584		X-12407	X-12407	0.1	0.422794	1.42583e-05	39472	M33835.metal.pos.txt	Unknown	Unknown	Shin	2660	#N/A	6358	0.462228	No	No	No
585		X-12407	X-12407	0.2	0.0972875	0.000632369	68437	M33835.metal.pos.txt	Unknown	Unknown	Shin	2660	#N/A	3238	0.208847	No	No	No
586		X-12407	X-12407	0.3	0.138657	0.000443586	93609	M33835.metal.pos.txt	Unknown	Unknown	Shin	2660	#N/A	3780	0.254976	No	No	No
587		X-12407	X-12407	0.4	0.0802433	0.00074019	115809	M33835.metal.pos.txt	Unknown	Unknown	Shin	2660	#N/A	3020	0.184692	No	No	No
588		X-12407	X-12407	0.5	0.0544096	0.000966182	135219	M33835.metal.pos.txt	Unknown	Unknown	Shin	2660	#N/A	2612	0.144794	No	No	No
589	M38768	15-methylpalmitate (isobar with 2-methylpalmitate)	15-methylpalmitate (isobar with 2-methylpalmitate)	0.001	0.301786	3.88412e-05	856	M38768.metal.pos.txt	Lipid	Fatty Acid, Branched	Shin	6942	#N/A	5338	0.392978	No	No	No
590		15-methylpalmitate (isobar with 2-methylpalmitate)	15-methylpalmitate (isobar with 2-methylpalmitate)	0.05	0.0589727	0.000352055	22465	M38768.metal.pos.txt	Lipid	Fatty Acid, Branched	Shin	6942	#N/A	2709	0.151318	No	No	No
591		15-methylpalmitate (isobar with 2-methylpalmitate)	15-methylpalmitate (isobar with 2-methylpalmitate)	0.1	0.067308	0.000322398	39530	M38768.metal.pos.txt	Lipid	Fatty Acid, Branched	Shin	6942	#N/A	2835	0.165029	No	No	No
592		15-methylpalmitate (isobar with 2-methylpalmitate)	15-methylpalmitate (isobar with 2-methylpalmitate)	0.2	0.0989232	0.000238837	68522	M38768.metal.pos.txt	Lipid	Fatty Acid, Branched	Shin	6942	#N/A	3263	0.210731	No	No	No
593		15-methylpalmitate (isobar with 2-methylpalmitate)	15-methylpalmitate (isobar with 2-methylpalmitate)	0.3	0.101765	0.000232883	93695	M38768.metal.pos.txt	Lipid	Fatty Acid, Branched	Shin	6942	#N/A	3304	0.214095	No	No	No
594		15-methylpalmitate (isobar with 2-methylpalmitate)	15-methylpalmitate (isobar with 2-methylpalmitate)	0.4	0.188335	0.000112575	115945	M38768.metal.pos.txt	Lipid	Fatty Acid, Branched	Shin	6942	#N/A	4299	0.304516	No	No	No
595		15-methylpalmitate (isobar with 2-methylpalmitate)	15-methylpalmitate (isobar with 2-methylpalmitate)	0.5	0.227673	8.02778e-05	135379	M38768.metal.pos.txt	Lipid	Fatty Acid, Branched	Shin	6942	#N/A	4671	0.338804	No	No	No
596	M32348	2-aminobutyrate	2-aminobutyrate	0.001	0.213507	8.56624e-05	856	M32348.metal.pos.txt	Amino acid	Butanoate metabolism	Shin	7365	HMDB0000452	4529	0.327685	No	No	No
597		2-aminobutyrate	2-aminobutyrate	0.05	0.159375	0.000134962	22466	M32348.metal.pos.txt	Amino acid	Butanoate metabolism	Shin	7365	HMDB0000452	4003	0.276747	No	No	No
598		2-aminobutyrate	2-aminobutyrate	0.1	0.350366	2.00558e-05	39527	M32348.metal.pos.txt	Amino acid	Butanoate metabolism	Shin	7365	HMDB0000452	5773	0.421859	No	No	No
599		2-aminobutyrate	2-aminobutyrate	0.2	0.387637	1.10658e-05	68521	M32348.metal.pos.txt	Amino acid	Butanoate metabolism	Shin	7365	HMDB0000452	6061	0.444558	No	No	No
600		2-aminobutyrate	2-aminobutyrate	0.3	0.290344	4.1428e-05	93694	M32348.metal.pos.txt	Amino acid	Butanoate metabolism	Shin	7365	HMDB0000452	5234	0.385591	No	No	No
601		2-aminobutyrate	2-aminobutyrate	0.4	0.166378	0.000127371	115946	M32348.metal.pos.txt	Amino acid	Butanoate metabolism	Shin	7365	HMDB0000452	4082	0.283315	No	No	No
602		2-aminobutyrate	2-aminobutyrate	0.5	0.168348	0.000125311	135381	M32348.metal.pos.txt	Amino acid	Butanoate metabolism	Shin	7365	HMDB0000452	4101	0.285341	No	No	No
603	M21047	3-methyl-2-oxobutyrate	3-methyl-2-oxobutyrate	0.001	0.197099	0.00010078	856	M21047.metal.pos.txt	Amino acid	Leucine, Isoleucine and Valine Metabolism	Shin	7203	HMDB0000019	4382	0.31265	No	No	No
604		3-methyl-2-oxobutyrate	3-methyl-2-oxobutyrate	0.05	0.0449051	0.000399445	22463	M21047.metal.pos.txt	Amino acid	Leucine, Isoleucine and Valine Metabolism	Shin	7203	HMDB0000019	2425	0.128715	No	No	No
605		3-methyl-2-oxobutyrate	3-methyl-2-oxobutyrate	0.1	0.00710438	0.000834307	39527	M21047.metal.pos.txt	Amino acid	Leucine, Isoleucine and Valine Metabolism	Shin	7203	HMDB0000019	1259	0.0392236	Yes	No	No
606		3-methyl-2-oxobutyrate	3-methyl-2-oxobutyrate	0.2	0.00157017	0.00121044	68520	M21047.metal.pos.txt	Amino acid	Leucine, Isoleucine and Valine Metabolism	Shin	7203	HMDB0000019	772	0.0141377	Yes	No	No
607		3-methyl-2-oxobutyrate	3-methyl-2-oxobutyrate	0.3	0.0119313	0.000708425	93695	M21047.metal.pos.txt	Amino acid	Leucine, Isoleucine and Valine Metabolism	Shin	7203	HMDB0000019	1499	0.0553263	No	No	No
608		3-methyl-2-oxobutyrate	3-methyl-2-oxobutyrate	0.4	0.0296387	0.000493768	115947	M21047.metal.pos.txt	Amino acid	Leucine, Isoleucine and Valine Metabolism	Shin	7203	HMDB0000019	2036	0.101188	No	No	No
609		3-methyl-2-oxobutyrate	3-methyl-2-oxobutyrate	0.5	0.036839	0.000444038	135382	M21047.metal.pos.txt	Amino acid	Leucine, Isoleucine and Valine Metabolism	Shin	7203	HMDB0000019	2226	0.115035	No	No	No
610	MetaAnalysis_SM.C26.1_HetISqLt75_HetDfGt0_HWEPValGt1EMinus6.tsv.fixed_TS_Oct2018.so_RAW.txt	Sphingomyeline C26:1	SM C26:1	0.001	0.182959	0.000109415	936	MetaAnalysis_SM.C26.1_HetISqLt75_HetDfGt0_HWEPValGt1EMinus6.tsv.fixed	Lipid	Sphingolipid Metabolism	Draaisma	7471	#N/A	4250	0.299234	No	No	No
611		Sphingomyeline C26:1	SM C26:1	0.05	0.0886459	0.000243603	24939	MetaAnalysis_SM.C26.1_HetISqLt75_HetDfGt0_HWEPValGt1EMinus6.tsv.fixed	Lipid	Sphingolipid Metabolism	Draaisma	7471	#N/A	3143	0.196048	No	No	No
612		Sphingomyeline C26:1	SM C26:1	0.1	0.101442	0.000217014	43991	MetaAnalysis_SM.C26.1_HetISqLt75_HetDfGt0_HWEPValGt1EMinus6.tsv.fixed	Lipid	Sphingolipid Metabolism	Draaisma	7471	#N/A	3300	0.213675	No	No	No
613		Sphingomyeline C26:1	SM C26:1	0.2	0.0505156	0.000359886	76859	MetaAnalysis_SM.C26.1_HetISqLt75_HetDfGt0_HWEPValGt1EMinus6.tsv.fixed	Lipid	Sphingolipid Metabolism	Draaisma	7471	#N/A	2536	0.13846	No	No	No
614		Sphingomyeline C26:1	SM C26:1	0.3	0.0526425	0.00035111	105386	MetaAnalysis_SM.C26.1_HetISqLt75_HetDfGt0_HWEPValGt1EMinus6.tsv.fixed	Lipid	Sphingolipid Metabolism	Draaisma	7471	#N/A	2583	0.141664	No	No	No
615		Sphingomyeline C26:1	SM C26:1	0.4	0.0241602	0.000521723	130803	MetaAnalysis_SM.C26.1_HetISqLt75_HetDfGt0_HWEPValGt1EMinus6.tsv.fixed	Lipid	Sphingolipid Metabolism	Draaisma	7471	#N/A	1903	0.0882487	No	No	No
616		Sphingomyeline C26:1	SM C26:1	0.5	0.0277639	0.000490599	153187	MetaAnalysis_SM.C26.1_HetISqLt75_HetDfGt0_HWEPValGt1EMinus6.tsv.fixed	Lipid	Sphingolipid Metabolism	Draaisma	7471	#N/A	1992	0.0968809	No	No	No
617	M31591	androsterone sulfate	androsterone sulfate	0.001	0.173158	0.000120858	856	M31591.metal.pos.txt	Lipid	Steroid	Shin	7338	HMDB0002759	4140	0.290729	No	No	No
618		androsterone sulfate	androsterone sulfate	0.05	0.419644	5.60495e-06	22462	M31591.metal.pos.txt	Lipid	Steroid	Shin	7338	HMDB0002759	6329	0.460886	No	No	No
619		androsterone sulfate	androsterone sulfate	0.1	0.316429	3.10984e-05	39524	M31591.metal.pos.txt	Lipid	Steroid	Shin	7338	HMDB0002759	5459	0.402913	No	No	No
620		androsterone sulfate	androsterone sulfate	0.2	0.462357	1.21695e-06	68516	M31591.metal.pos.txt	Lipid	Steroid	Shin	7338	HMDB0002759	6682	0.48097	No	No	No
621		androsterone sulfate	androsterone sulfate	0.3	0.244341	6.53329e-05	93691	M31591.metal.pos.txt	Lipid	Steroid	Shin	7338	HMDB0002759	4812	0.352953	No	No	No
622		androsterone sulfate	androsterone sulfate	0.4	0.125453	0.000179632	115940	M31591.metal.pos.txt	Lipid	Steroid	Shin	7338	HMDB0002759	3607	0.241758	No	No	No
623		androsterone sulfate	androsterone sulfate	0.5	0.157948	0.000137066	135377	M31591.metal.pos.txt	Lipid	Steroid	Shin	7338	HMDB0002759	3987	0.27537	No	No	No
624	MetaAnalysis_PC.ae.C34.0_HetISqLt75_HetDfGt0_HWEPValGt1EMinus6.tsv.fixed_TS_Oct2018.so_RAW.txt	phosphatidylcholine acyl-alkyl c34:0	PC ae C34:0	0.001	0.117397	0.000188797	938	MetaAnalysis_PC.ae.C34.0_HetISqLt75_HetDfGt0_HWEPValGt1EMinus6.tsv.fixed	Lipid	Glycerophospholipids	Draaisma	7476	#N/A	3509	0.232552	No	No	No
625		phosphatidylcholine acyl-alkyl c34:0	PC ae C34:0	0.05	0.0165531	0.000607129	24956	MetaAnalysis_PC.ae.C34.0_HetISqLt75_HetDfGt0_HWEPValGt1EMinus6.tsv.fixed	Lipid	Glycerophospholipids	Draaisma	7476	#N/A	1650	0.0697338	No	No	No
626		phosphatidylcholine acyl-alkyl c34:0	PC ae C34:0	0.1	0.0658166	0.000304012	44023	MetaAnalysis_PC.ae.C34.0_HetISqLt75_HetDfGt0_HWEPValGt1EMinus6.tsv.fixed	Lipid	Glycerophospholipids	Draaisma	7476	#N/A	2811	0.16275	No	No	No
627		phosphatidylcholine acyl-alkyl c34:0	PC ae C34:0	0.2	0.257074	5.69295e-05	76964	MetaAnalysis_PC.ae.C34.0_HetISqLt75_HetDfGt0_HWEPValGt1EMinus6.tsv.fixed	Lipid	Glycerophospholipids	Draaisma	7476	#N/A	4926	0.362753	No	No	No
628		phosphatidylcholine acyl-alkyl c34:0	PC ae C34:0	0.3	0.304889	3.4844e-05	105553	MetaAnalysis_PC.ae.C34.0_HetISqLt75_HetDfGt0_HWEPValGt1EMinus6.tsv.fixed	Lipid	Glycerophospholipids	Draaisma	7476	#N/A	5361	0.395315	No	No	No
629		phosphatidylcholine acyl-alkyl c34:0	PC ae C34:0	0.4	0.301833	3.60484e-05	130988	MetaAnalysis_PC.ae.C34.0_HetISqLt75_HetDfGt0_HWEPValGt1EMinus6.tsv.fixed	Lipid	Glycerophospholipids	Draaisma	7476	#N/A	5340	0.392891	No	No	No
630		phosphatidylcholine acyl-alkyl c34:0	PC ae C34:0	0.5	0.343508	2.17138e-05	153387	MetaAnalysis_PC.ae.C34.0_HetISqLt75_HetDfGt0_HWEPValGt1EMinus6.tsv.fixed	Lipid	Glycerophospholipids	Draaisma	7476	#N/A	5712	0.418019	No	No	No
631	MetaAnalysis_Trp_HetISqLt75_HetDfGt0_HWEPValGt1EMinus6.tsv.fixed_TS_Oct2018.so_RAW.txt	tryptophan	Trp	0.001	0.451804	2.58942e-06	932	MetaAnalysis_Trp_HetISqLt75_HetDfGt0_HWEPValGt1EMinus6.tsv.fixed	Amino acid	Tryptophan Metabolism	Draaisma	5666	HMDB0000929	6593	0.476337	No	No	No
632		tryptophan	Trp	0.05	0.00388911	0.0012499	24858	MetaAnalysis_Trp_HetISqLt75_HetDfGt0_HWEPValGt1EMinus6.tsv.fixed	Amino acid	Tryptophan Metabolism	Draaisma	5666	HMDB0000929	1047	0.0258197	Yes	No	No
633		tryptophan	Trp	0.1	0.0292032	0.000632228	43847	MetaAnalysis_Trp_HetISqLt75_HetDfGt0_HWEPValGt1EMinus6.tsv.fixed	Amino acid	Tryptophan Metabolism	Draaisma	5666	HMDB0000929	2029	0.100045	No	No	No
634		tryptophan	Trp	0.2	0.241066	8.72202e-05	76576	MetaAnalysis_Trp_HetISqLt75_HetDfGt0_HWEPValGt1EMinus6.tsv.fixed	Amino acid	Tryptophan Metabolism	Draaisma	5666	HMDB0000929	4780	0.350554	No	No	No
635		tryptophan	Trp	0.3	0.175514	0.000153544	105026	MetaAnalysis_Trp_HetISqLt75_HetDfGt0_HWEPValGt1EMinus6.tsv.fixed	Amino acid	Tryptophan Metabolism	Draaisma	5666	HMDB0000929	4168	0.292705	No	No	No
636		tryptophan	Trp	0.4	0.282432	5.84995e-05	130337	MetaAnalysis_Trp_HetISqLt75_HetDfGt0_HWEPValGt1EMinus6.tsv.fixed	Amino acid	Tryptophan Metabolism	Draaisma	5666	HMDB0000929	5172	0.37958	No	No	No
637		tryptophan	Trp	0.5	0.317989	3.95543e-05	152622	MetaAnalysis_Trp_HetISqLt75_HetDfGt0_HWEPValGt1EMinus6.tsv.fixed	Amino acid	Tryptophan Metabolism	Draaisma	5666	HMDB0000929	5476	0.403642	No	No	No
638	M33653	X-12231	X-12231	0.001	0.336253	3.71709e-05	857	M33653.metal.pos.txt	Unknown	Unknown	Shin	4807	#N/A	5651	0.413608	No	No	No
639		X-12231	X-12231	0.05	0.280463	7.03332e-05	22463	M33653.metal.pos.txt	Unknown	Unknown	Shin	4807	#N/A	5151	0.37847	No	No	No
640		X-12231	X-12231	0.1	0.137878	0.000247086	39525	M33653.metal.pos.txt	Unknown	Unknown	Shin	4807	#N/A	3772	0.25408	No	No	No
641		X-12231	X-12231	0.2	0.107577	0.000319566	68514	M33653.metal.pos.txt	Unknown	Unknown	Shin	4807	#N/A	3374	0.221627	No	No	No
642		X-12231	X-12231	0.3	0.0609326	0.00049773	93692	M33653.metal.pos.txt	Unknown	Unknown	Shin	4807	#N/A	2735	0.15486	No	No	No
643		X-12231	X-12231	0.4	0.0163947	0.00094749	115942	M33653.metal.pos.txt	Unknown	Unknown	Shin	4807	#N/A	1644	0.0693184	No	No	No
644		X-12231	X-12231	0.5	0.0183871	0.000906773	135375	M33653.metal.pos.txt	Unknown	Unknown	Shin	4807	#N/A	1713	0.0746111	No	No	No
645	M32808	X-11491	X-11491	0.001	0.27212	5.93105e-05	856	M32808.metal.pos.txt	Unknown	Unknown	Shin	6200	#N/A	5065	0.373447	No	No	No
646		X-11491	X-11491	0.05	0.33999	2.74428e-05	22466	M32808.metal.pos.txt	Unknown	Unknown	Shin	6200	#N/A	5681	0.415996	No	No	No
647		X-11491	X-11491	0.1	0.315265	3.73125e-05	39524	M32808.metal.pos.txt	Unknown	Unknown	Shin	6200	#N/A	5445	0.402463	No	No	No
648		X-11491	X-11491	0.2	0.296153	4.62504e-05	68524	M32808.metal.pos.txt	Unknown	Unknown	Shin	6200	#N/A	5286	0.389436	No	No	No
649		X-11491	X-11491	0.3	0.230088	8.7975e-05	93698	M32808.metal.pos.txt	Unknown	Unknown	Shin	6200	#N/A	4698	0.34043	No	No	No
650		X-11491	X-11491	0.4	0.247436	7.51446e-05	115949	M32808.metal.pos.txt	Unknown	Unknown	Shin	6200	#N/A	4843	0.355137	No	No	No
651		X-11491	X-11491	0.5	0.271127	5.98978e-05	135385	M32808.metal.pos.txt	Unknown	Unknown	Shin	6200	#N/A	5056	0.372746	No	No	No
652	M31522	pyroglutamylglycine	pyroglutamylglycine	0.001	0.346178	0.000100474	855	M31522.metal.pos.txt	Peptide	Dipeptide	Shin	1558	#N/A	5737	0.419432	No	No	No
653		pyroglutamylglycine	pyroglutamylglycine	0.05	0.498762	6.17606e-09	22453	M31522.metal.pos.txt	Peptide	Dipeptide	Shin	1558	#N/A	6941	0.499481	No	No	No
654		pyroglutamylglycine	pyroglutamylglycine	0.1	0.251245	0.000288581	39512	M31522.metal.pos.txt	Peptide	Dipeptide	Shin	1558	#N/A	4879	0.357943	No	No	No
655		pyroglutamylglycine	pyroglutamylglycine	0.2	0.340998	0.000107752	68505	M31522.metal.pos.txt	Peptide	Dipeptide	Shin	1558	#N/A	5687	0.416789	No	No	No
656		pyroglutamylglycine	pyroglutamylglycine	0.3	0.200278	0.000453463	93677	M31522.metal.pos.txt	Peptide	Dipeptide	Shin	1558	#N/A	4419	0.315034	No	No	No
657		pyroglutamylglycine	pyroglutamylglycine	0.4	0.263714	0.000256287	115920	M31522.metal.pos.txt	Peptide	Dipeptide	Shin	1558	#N/A	4989	0.367423	No	No	No
658		pyroglutamylglycine	pyroglutamylglycine	0.5	0.283924	0.000209411	135335	M31522.metal.pos.txt	Peptide	Dipeptide	Shin	1558	#N/A	5182	0.380849	No	No	No
659	Summary_statistics_MAGNETIC_S.LDL.C.txt_TS_Oct2018.so_RAW.txt	total,cholesterol,in,small,ldl	S.LDL.C	0.001	0.100766	7.56718e-05	2243	Summary_statistics_MAGNETIC_S.LDL.C.txt	Lipid	Lipid ratios	Kettunen	21556	#N/A	3288	0.213024	No	No	No
660		total,cholesterol,in,small,ldl	S.LDL.C	0.05	0.0573167	0.000115467	68676	Summary_statistics_MAGNETIC_S.LDL.C.txt	Lipid	Lipid ratios	Kettunen	21556	#N/A	2673	0.149049	No	No	No
661		total,cholesterol,in,small,ldl	S.LDL.C	0.1	0.00520438	0.000304443	124391	Summary_statistics_MAGNETIC_S.LDL.C.txt	Lipid	Lipid ratios	Kettunen	21556	#N/A	1137	0.0318167	Yes	No	No
662		total,cholesterol,in,small,ldl	S.LDL.C	0.2	0.00233265	0.000371281	223594	Summary_statistics_MAGNETIC_S.LDL.C.txt	Lipid	Lipid ratios	Kettunen	21556	#N/A	888	0.0182593	Yes	No	No
663		total,cholesterol,in,small,ldl	S.LDL.C	0.3	0.00732738	0.000276335	311216	Summary_statistics_MAGNETIC_S.LDL.C.txt	Lipid	Lipid ratios	Kettunen	21556	#N/A	1273	0.0400099	Yes	No	No
664		total,cholesterol,in,small,ldl	S.LDL.C	0.4	0.00474331	0.000312108	390438	Summary_statistics_MAGNETIC_S.LDL.C.txt	Lipid	Lipid ratios	Kettunen	21556	#N/A	1108	0.029757	Yes	No	No
665		total,cholesterol,in,small,ldl	S.LDL.C	0.5	0.00785002	0.000270708	461318	Summary_statistics_MAGNETIC_S.LDL.C.txt	Lipid	Lipid ratios	Kettunen	21556	#N/A	1296	0.042103	Yes	No	No
666	M32198	acetylcarnitine	acetylcarnitine	0.001	0.162001	0.000132226	856	M32198.metal.pos.txt	Lipid	Fatty Acid Metabolism(Acyl Carnitine)	Shin	7356	HMDB0000201	4025	0.279769	No	No	No
667		acetylcarnitine	acetylcarnitine	0.05	0.238459	6.87719e-05	22462	M32198.metal.pos.txt	Lipid	Fatty Acid Metabolism(Acyl Carnitine)	Shin	7356	HMDB0000201	4763	0.348001	No	No	No
668		acetylcarnitine	acetylcarnitine	0.1	0.142836	0.000154951	39529	M32198.metal.pos.txt	Lipid	Fatty Acid Metabolism(Acyl Carnitine)	Shin	7356	HMDB0000201	3820	0.259909	No	No	No
669		acetylcarnitine	acetylcarnitine	0.2	0.113121	0.000199047	68522	M32198.metal.pos.txt	Lipid	Fatty Acid Metabolism(Acyl Carnitine)	Shin	7356	HMDB0000201	3444	0.228311	No	No	No
670		acetylcarnitine	acetylcarnitine	0.3	0.183725	0.000110417	93697	M32198.metal.pos.txt	Lipid	Fatty Acid Metabolism(Acyl Carnitine)	Shin	7356	HMDB0000201	4258	0.299923	No	No	No
671		acetylcarnitine	acetylcarnitine	0.4	0.332559	2.54709e-05	115948	M32198.metal.pos.txt	Lipid	Fatty Acid Metabolism(Acyl Carnitine)	Shin	7356	HMDB0000201	5612	0.411906	No	No	No
672		acetylcarnitine	acetylcarnitine	0.5	0.417217	5.93913e-06	135382	M32198.metal.pos.txt	Lipid	Fatty Acid Metabolism(Acyl Carnitine)	Shin	7356	HMDB0000201	6308	0.459746	No	No	No
673	MetaAnalysis_PC.aa.C40.4_HetISqLt75_HetDfGt0_HWEPValGt1EMinus6.tsv.fixed_TS_Oct2018.so_RAW.txt	phosphatidylcholine diacyl c40:4	PC aa C40:4	0.001	0.39944	8.68855e-06	938	MetaAnalysis_PC.aa.C40.4_HetISqLt75_HetDfGt0_HWEPValGt1EMinus6.tsv.fixed	Lipid	Glycerophospholipids	Draaisma	7472	#N/A	6163	0.450513	No	No	No
674		phosphatidylcholine diacyl c40:4	PC aa C40:4	0.05	0.108552	0.000203861	24960	MetaAnalysis_PC.aa.C40.4_HetISqLt75_HetDfGt0_HWEPValGt1EMinus6.tsv.fixed	Lipid	Glycerophospholipids	Draaisma	7472	#N/A	3385	0.222909	No	No	No
675		phosphatidylcholine diacyl c40:4	PC aa C40:4	0.1	0.0116646	0.000688176	44031	MetaAnalysis_PC.aa.C40.4_HetISqLt75_HetDfGt0_HWEPValGt1EMinus6.tsv.fixed	Lipid	Glycerophospholipids	Draaisma	7472	#N/A	1487	0.0545264	No	No	No
676		phosphatidylcholine diacyl c40:4	PC aa C40:4	0.2	0.00579742	0.000852392	76945	MetaAnalysis_PC.aa.C40.4_HetISqLt75_HetDfGt0_HWEPValGt1EMinus6.tsv.fixed	Lipid	Glycerophospholipids	Draaisma	7472	#N/A	1177	0.0342378	Yes	No	No
677		phosphatidylcholine diacyl c40:4	PC aa C40:4	0.3	0.00585138	0.000850195	105538	MetaAnalysis_PC.aa.C40.4_HetISqLt75_HetDfGt0_HWEPValGt1EMinus6.tsv.fixed	Lipid	Glycerophospholipids	Draaisma	7472	#N/A	1181	0.0344394	Yes	No	No
678		phosphatidylcholine diacyl c40:4	PC aa C40:4	0.4	0.00118517	0.0012356	130964	MetaAnalysis_PC.aa.C40.4_HetISqLt75_HetDfGt0_HWEPValGt1EMinus6.tsv.fixed	Lipid	Glycerophospholipids	Draaisma	7472	#N/A	701	0.0117519	Yes	No	No
679		phosphatidylcholine diacyl c40:4	PC aa C40:4	0.5	0.00124841	0.00122288	153360	MetaAnalysis_PC.aa.C40.4_HetISqLt75_HetDfGt0_HWEPValGt1EMinus6.tsv.fixed	Lipid	Glycerophospholipids	Draaisma	7472	#N/A	714	0.0121537	Yes	No	No
680	normres_UDP_imputed_complete_CHARGE.csv_TS_Oct2018.so_RAW.txt	uridine diphosphate	UDP	0.001	0.0271302	0.00295935	942	normres_UDP_imputed_complete_CHARGE.csv	Nucleotide	Pyrimidine Metabolism, Uracil containing	Rhee	1250	HMDB0000295	1976	0.0954363	No	No	No
681		uridine diphosphate	UDP	0.05	0.000929827	0.00771659	25642	normres_UDP_imputed_complete_CHARGE.csv	Nucleotide	Pyrimidine Metabolism, Uracil containing	Rhee	1250	HMDB0000295	653	0.00989774	Yes	Yes	No
682		uridine diphosphate	UDP	0.1	0.00382868	0.00567337	45470	normres_UDP_imputed_complete_CHARGE.csv	Nucleotide	Pyrimidine Metabolism, Uracil containing	Rhee	1250	HMDB0000295	1041	0.025565	Yes	No	No
683		uridine diphosphate	UDP	0.2	0.0130812	0.00394839	79786	normres_UDP_imputed_complete_CHARGE.csv	Nucleotide	Pyrimidine Metabolism, Uracil containing	Rhee	1250	HMDB0000295	1537	0.059159	No	No	No
684		uridine diphosphate	UDP	0.3	0.00869801	0.00451456	109787	normres_UDP_imputed_complete_CHARGE.csv	Nucleotide	Pyrimidine Metabolism, Uracil containing	Rhee	1250	HMDB0000295	1353	0.0446858	Yes	No	No
685		uridine diphosphate	UDP	0.4	0.00560552	0.00513203	136585	normres_UDP_imputed_complete_CHARGE.csv	Nucleotide	Pyrimidine Metabolism, Uracil containing	Rhee	1250	HMDB0000295	1163	0.033503	Yes	No	No
686		uridine diphosphate	UDP	0.5	0.00467757	0.00538842	160343	normres_UDP_imputed_complete_CHARGE.csv	Nucleotide	Pyrimidine Metabolism, Uracil containing	Rhee	1250	HMDB0000295	1105	0.0294243	Yes	No	No
687	M03127	hypoxanthine	hypoxanthine	0.001	0.0809098	0.000281928	856	M03127.metal.pos.txt	Nucleotide	Purine Metabolism, (Hypo)Xanthine/Inosine containing	Shin	6941	HMDB0000157	3025	0.185919	No	No	No
688		hypoxanthine	hypoxanthine	0.05	0.00692974	0.00087211	22464	M03127.metal.pos.txt	Nucleotide	Purine Metabolism, (Hypo)Xanthine/Inosine containing	Shin	6941	HMDB0000157	1241	0.0388144	Yes	No	No
689		hypoxanthine	hypoxanthine	0.1	0.0486937	0.000395803	39528	M03127.metal.pos.txt	Nucleotide	Purine Metabolism, (Hypo)Xanthine/Inosine containing	Shin	6941	HMDB0000157	2500	0.135388	No	No	No
690		hypoxanthine	hypoxanthine	0.2	0.0257144	0.000546494	68522	M03127.metal.pos.txt	Nucleotide	Purine Metabolism, (Hypo)Xanthine/Inosine containing	Shin	6941	HMDB0000157	1950	0.091662	No	No	No
691		hypoxanthine	hypoxanthine	0.3	0.00710973	0.000865594	93694	M03127.metal.pos.txt	Nucleotide	Purine Metabolism, (Hypo)Xanthine/Inosine containing	Shin	6941	HMDB0000157	1260	0.039222	Yes	No	No
692		hypoxanthine	hypoxanthine	0.4	0.00978009	0.000784986	115947	M03127.metal.pos.txt	Nucleotide	Purine Metabolism, (Hypo)Xanthine/Inosine containing	Shin	6941	HMDB0000157	1401	0.0485235	Yes	No	No
693		hypoxanthine	hypoxanthine	0.5	0.0106654	0.000763224	135381	M03127.metal.pos.txt	Nucleotide	Purine Metabolism, (Hypo)Xanthine/Inosine containing	Shin	6941	HMDB0000157	1440	0.0514828	No	No	No
694	Summary_statistics_MAGNETIC_L.VLDL.L.txt_TS_Oct2018.so_RAW.txt	total,lipids,in,large,vldl	L.VLDL.L	0.001	0.472292	2.54831e-07	2242	Summary_statistics_MAGNETIC_L.VLDL.L.txt	Lipid	Lipid ratios	Kettunen	18960	#N/A	6749	0.486428	No	No	No
695		total,lipids,in,large,vldl	L.VLDL.L	0.05	0.495669	6.21765e-09	68532	Summary_statistics_MAGNETIC_L.VLDL.L.txt	Lipid	Lipid ratios	Kettunen	18960	#N/A	6922	0.497745	No	No	No
696		total,lipids,in,large,vldl	L.VLDL.L	0.1	0.333741	9.73424e-06	124114	Summary_statistics_MAGNETIC_L.VLDL.L.txt	Lipid	Lipid ratios	Kettunen	18960	#N/A	5624	0.412488	No	No	No
697		total,lipids,in,large,vldl	L.VLDL.L	0.2	0.450067	8.30592e-07	223075	Summary_statistics_MAGNETIC_L.VLDL.L.txt	Lipid	Lipid ratios	Kettunen	18960	#N/A	6575	0.475805	No	No	No
698		total,lipids,in,large,vldl	L.VLDL.L	0.3	0.480739	1.23032e-07	310425	Summary_statistics_MAGNETIC_L.VLDL.L.txt	Lipid	Lipid ratios	Kettunen	18960	#N/A	6817	0.490189	No	No	No
699		total,lipids,in,large,vldl	L.VLDL.L	0.4	0.394801	3.75514e-06	389437	Summary_statistics_MAGNETIC_L.VLDL.L.txt	Lipid	Lipid ratios	Kettunen	18960	#N/A	6124	0.448115	No	No	No
700		total,lipids,in,large,vldl	L.VLDL.L	0.5	0.480671	1.23908e-07	460137	Summary_statistics_MAGNETIC_L.VLDL.L.txt	Lipid	Lipid ratios	Kettunen	18960	#N/A	6816	0.490191	No	No	No
701	MetaAnalysis_PC.aa.C36.6_HetISqLt75_HetDfGt0_HWEPValGt1EMinus6.tsv.fixed_TS_Oct2018.so_RAW.txt	phosphatidylcholine diacyl c36:6	PC aa C36:6	0.001	0.125121	0.000176858	932	MetaAnalysis_PC.aa.C36.6_HetISqLt75_HetDfGt0_HWEPValGt1EMinus6.tsv.fixed	Lipid	Glycerophospholipids	Draaisma	7474	#N/A	3602	0.241453	No	No	No
702		phosphatidylcholine diacyl c36:6	PC aa C36:6	0.05	0.127996	0.000172624	24940	MetaAnalysis_PC.aa.C36.6_HetISqLt75_HetDfGt0_HWEPValGt1EMinus6.tsv.fixed	Lipid	Glycerophospholipids	Draaisma	7474	#N/A	3652	0.24362	No	No	No
703		phosphatidylcholine diacyl c36:6	PC aa C36:6	0.1	0.186549	0.000106138	44021	MetaAnalysis_PC.aa.C36.6_HetISqLt75_HetDfGt0_HWEPValGt1EMinus6.tsv.fixed	Lipid	Glycerophospholipids	Draaisma	7474	#N/A	4282	0.302826	No	No	No
704		phosphatidylcholine diacyl c36:6	PC aa C36:6	0.2	0.356429	1.81212e-05	76948	MetaAnalysis_PC.aa.C36.6_HetISqLt75_HetDfGt0_HWEPValGt1EMinus6.tsv.fixed	Lipid	Glycerophospholipids	Draaisma	7474	#N/A	5815	0.42606	No	No	No
705		phosphatidylcholine diacyl c36:6	PC aa C36:6	0.3	0.329627	2.60141e-05	105534	MetaAnalysis_PC.aa.C36.6_HetISqLt75_HetDfGt0_HWEPValGt1EMinus6.tsv.fixed	Lipid	Glycerophospholipids	Draaisma	7474	#N/A	5581	0.410542	No	No	No
706		phosphatidylcholine diacyl c36:6	PC aa C36:6	0.4	0.269741	5.03735e-05	130958	MetaAnalysis_PC.aa.C36.6_HetISqLt75_HetDfGt0_HWEPValGt1EMinus6.tsv.fixed	Lipid	Glycerophospholipids	Draaisma	7474	#N/A	5047	0.371502	No	No	No
707		phosphatidylcholine diacyl c36:6	PC aa C36:6	0.5	0.20502	9.08019e-05	153361	MetaAnalysis_PC.aa.C36.6_HetISqLt75_HetDfGt0_HWEPValGt1EMinus6.tsv.fixed	Lipid	Glycerophospholipids	Draaisma	7474	#N/A	4465	0.31917	No	No	No
708	normres_cystathionine_imputed_complete_CHARGE.csv_TS_Oct2018.so_RAW.txt	cystathionine	cystathionine	0.001	0.458662	7.75211e-06	942	normres_cystathionine_imputed_complete_CHARGE.csv	Amino acid	Methionine, Cysteine, Sam And Taurine Metabolism	Rhee	1390	HMDB0000099	6649	0.479495	No	No	No
709		cystathionine	cystathionine	0.05	0.00161507	0.00621992	25642	normres_cystathionine_imputed_complete_CHARGE.csv	Amino acid	Methionine, Cysteine, Sam And Taurine Metabolism	Rhee	1390	HMDB0000099	778	0.0144298	Yes	No	No
710		cystathionine	cystathionine	0.1	0.000783266	0.00716748	45470	normres_cystathionine_imputed_complete_CHARGE.csv	Amino acid	Methionine, Cysteine, Sam And Taurine Metabolism	Rhee	1390	HMDB0000099	620	0.00878142	Yes	Yes	No
711		cystathionine	cystathionine	0.2	0.0173377	0.00320427	79787	normres_cystathionine_imputed_complete_CHARGE.csv	Amino acid	Methionine, Cysteine, Sam And Taurine Metabolism	Rhee	1390	HMDB0000099	1677	0.0718631	No	No	No
712		cystathionine	cystathionine	0.3	0.0018655	0.00603231	109790	normres_cystathionine_imputed_complete_CHARGE.csv	Amino acid	Methionine, Cysteine, Sam And Taurine Metabolism	Rhee	1390	HMDB0000099	819	0.0158329	Yes	No	No
713		cystathionine	cystathionine	0.4	0.00157461	0.00625298	136590	normres_cystathionine_imputed_complete_CHARGE.csv	Amino acid	Methionine, Cysteine, Sam And Taurine Metabolism	Rhee	1390	HMDB0000099	773	0.0141592	Yes	No	No
714		cystathionine	cystathionine	0.5	0.00359062	0.00518584	160348	normres_cystathionine_imputed_complete_CHARGE.csv	Amino acid	Methionine, Cysteine, Sam And Taurine Metabolism	Rhee	1390	HMDB0000099	1018	0.0245171	Yes	No	No
715	normres_triiodothyronine_imputed_complete_CHARGE.csv_TS_Oct2018.so_RAW.txt	triiodothyronine	T3	0.001	0.0788158	0.00169508	942	normres_triiodothyronine_imputed_complete_CHARGE.csv	Amino acid	Tyrosine Metabolism	Rhee	1177	HMDB0000265	2996	0.18286	No	No	No
716		triiodothyronine	T3	0.05	0.279159	0.000291057	25641	normres_triiodothyronine_imputed_complete_CHARGE.csv	Amino acid	Tyrosine Metabolism	Rhee	1177	HMDB0000265	5139	0.37759	No	No	No
717		triiodothyronine	T3	0.1	0.112622	0.0012487	45469	normres_triiodothyronine_imputed_complete_CHARGE.csv	Amino acid	Tyrosine Metabolism	Rhee	1177	HMDB0000265	3442	0.227437	No	No	No
718		triiodothyronine	T3	0.2	0.183197	0.000692928	79785	normres_triiodothyronine_imputed_complete_CHARGE.csv	Amino acid	Tyrosine Metabolism	Rhee	1177	HMDB0000265	4255	0.299272	No	No	No
719		triiodothyronine	T3	0.3	0.195135	0.000626909	109786	normres_triiodothyronine_imputed_complete_CHARGE.csv	Amino acid	Tyrosine Metabolism	Rhee	1177	HMDB0000265	4363	0.310882	No	No	No
720		triiodothyronine	T3	0.4	0.23335	0.000450007	136584	normres_triiodothyronine_imputed_complete_CHARGE.csv	Amino acid	Tyrosine Metabolism	Rhee	1177	HMDB0000265	4730	0.342921	No	No	No
721		triiodothyronine	T3	0.5	0.23244	0.000453693	160343	normres_triiodothyronine_imputed_complete_CHARGE.csv	Amino acid	Tyrosine Metabolism	Rhee	1177	HMDB0000265	4723	0.34209	No	No	No
722	MetaAnalysis_PC.aa.C36.0_HetISqLt75_HetDfGt0_HWEPValGt1EMinus6.tsv.fixed_TS_Oct2018.so_RAW.txt	phosphatidylcholine diacyl c36:0	PC aa C36:0	0.001	0.287758	4.19388e-05	937	MetaAnalysis_PC.aa.C36.0_HetISqLt75_HetDfGt0_HWEPValGt1EMinus6.tsv.fixed	Lipid	Glycerophospholipids	Draaisma	7476	#N/A	5220	0.383181	No	No	No
723		phosphatidylcholine diacyl c36:0	PC aa C36:0	0.05	0.193407	0.000100174	24949	MetaAnalysis_PC.aa.C36.0_HetISqLt75_HetDfGt0_HWEPValGt1EMinus6.tsv.fixed	Lipid	Glycerophospholipids	Draaisma	7476	#N/A	4346	0.309335	No	No	No
724		phosphatidylcholine diacyl c36:0	PC aa C36:0	0.1	0.341612	2.22735e-05	44001	MetaAnalysis_PC.aa.C36.0_HetISqLt75_HetDfGt0_HWEPValGt1EMinus6.tsv.fixed	Lipid	Glycerophospholipids	Draaisma	7476	#N/A	5692	0.417173	No	No	No
725		phosphatidylcholine diacyl c36:0	PC aa C36:0	0.2	0.242733	6.50806e-05	76917	MetaAnalysis_PC.aa.C36.0_HetISqLt75_HetDfGt0_HWEPValGt1EMinus6.tsv.fixed	Lipid	Glycerophospholipids	Draaisma	7476	#N/A	4794	0.351948	No	No	No
726		phosphatidylcholine diacyl c36:0	PC aa C36:0	0.3	0.159024	0.000133345	105520	MetaAnalysis_PC.aa.C36.0_HetISqLt75_HetDfGt0_HWEPValGt1EMinus6.tsv.fixed	Lipid	Glycerophospholipids	Draaisma	7476	#N/A	4001	0.276275	No	No	No
727		phosphatidylcholine diacyl c36:0	PC aa C36:0	0.4	0.135842	0.000161601	130925	MetaAnalysis_PC.aa.C36.0_HetISqLt75_HetDfGt0_HWEPValGt1EMinus6.tsv.fixed	Lipid	Glycerophospholipids	Draaisma	7476	#N/A	3742	0.252335	No	No	No
728		phosphatidylcholine diacyl c36:0	PC aa C36:0	0.5	0.141655	0.000153967	153343	MetaAnalysis_PC.aa.C36.0_HetISqLt75_HetDfGt0_HWEPValGt1EMinus6.tsv.fixed	Lipid	Glycerophospholipids	Draaisma	7476	#N/A	3812	0.258301	No	No	No
729	normres_phenylalanine_imputed_complete_CHARGE.csv_TS_Oct2018.so_RAW.txt	phenylalanine	Phe	0.001	0.243926	0.000267033	942	normres_phenylalanine_imputed_complete_CHARGE.csv	Amino acid	Phenylalanine and Tyrosine Metabolism	Rhee	1802	HMDB0000159	4807	0.352722	No	No	No
730		phenylalanine	Phe	0.05	0.109333	0.00083933	25643	normres_phenylalanine_imputed_complete_CHARGE.csv	Amino acid	Phenylalanine and Tyrosine Metabolism	Rhee	1802	HMDB0000159	3394	0.223916	No	No	No
731		phenylalanine	Phe	0.1	0.0842412	0.00105183	45471	normres_phenylalanine_imputed_complete_CHARGE.csv	Amino acid	Phenylalanine and Tyrosine Metabolism	Rhee	1802	HMDB0000159	3082	0.189994	No	No	No
732		phenylalanine	Phe	0.2	0.251511	0.00024889	79790	normres_phenylalanine_imputed_complete_CHARGE.csv	Amino acid	Phenylalanine and Tyrosine Metabolism	Rhee	1802	HMDB0000159	4882	0.358102	No	No	No
733		phenylalanine	Phe	0.3	0.166935	0.000518085	109794	normres_phenylalanine_imputed_complete_CHARGE.csv	Amino acid	Phenylalanine and Tyrosine Metabolism	Rhee	1802	HMDB0000159	4088	0.283846	No	No	No
734		phenylalanine	Phe	0.4	0.18904	0.00043106	136596	normres_phenylalanine_imputed_complete_CHARGE.csv	Amino acid	Phenylalanine and Tyrosine Metabolism	Rhee	1802	HMDB0000159	4304	0.305301	No	No	No
735		phenylalanine	Phe	0.5	0.204327	0.000378794	160355	normres_phenylalanine_imputed_complete_CHARGE.csv	Amino acid	Phenylalanine and Tyrosine Metabolism	Rhee	1802	HMDB0000159	4456	0.318733	No	No	No
736	M33203	X-11858	X-11858	0.001	0.0906544	0.0005546	855	M33203.metal.pos.txt	Unknown	Unknown	Shin	3221	#N/A	3174	0.198532	No	No	No
737		X-11858	X-11858	0.05	0.214329	0.000194472	22448	M33203.metal.pos.txt	Unknown	Unknown	Shin	3221	#N/A	4538	0.328295	No	No	No
738		X-11858	X-11858	0.1	0.154697	0.000320738	39505	M33203.metal.pos.txt	Unknown	Unknown	Shin	3221	#N/A	3957	0.271746	No	No	No
739		X-11858	X-11858	0.2	0.297222	8.79986e-05	68480	M33203.metal.pos.txt	Unknown	Unknown	Shin	3221	#N/A	5297	0.390031	No	No	No
740		X-11858	X-11858	0.3	0.430881	9.41383e-06	93620	M33203.metal.pos.txt	Unknown	Unknown	Shin	3221	#N/A	6427	0.466011	No	No	No
741		X-11858	X-11858	0.4	0.498969	2.0739e-09	115848	M33203.metal.pos.txt	Unknown	Unknown	Shin	3221	#N/A	6946	0.499328	No	No	No
742		X-11858	X-11858	0.5	0.47844	9.07601e-07	135264	M33203.metal.pos.txt	Unknown	Unknown	Shin	3221	#N/A	6798	0.489208	No	No	No
743	M35977	X-14056	X-14056	0.001	0.190295	0.000111397	856	M35977.metal.pos.txt	Unknown	Unknown	Shin	6901	#N/A	4317	0.306403	No	No	No
744		X-14056	X-14056	0.05	0.245046	6.902e-05	22465	M35977.metal.pos.txt	Unknown	Unknown	Shin	6901	#N/A	4819	0.353459	No	No	No
745		X-14056	X-14056	0.1	0.202452	0.000100519	39529	M35977.metal.pos.txt	Unknown	Unknown	Shin	6901	#N/A	4435	0.317304	No	No	No
746		X-14056	X-14056	0.2	0.0808638	0.000283686	68521	M35977.metal.pos.txt	Unknown	Unknown	Shin	6901	#N/A	3024	0.185874	No	No	No
747		X-14056	X-14056	0.3	0.100776	0.000236329	93697	M35977.metal.pos.txt	Unknown	Unknown	Shin	6901	#N/A	3289	0.21298	No	No	No
748		X-14056	X-14056	0.4	0.0897103	0.000261148	115946	M35977.metal.pos.txt	Unknown	Unknown	Shin	6901	#N/A	3161	0.197272	No	No	No
749		X-14056	X-14056	0.5	0.0587376	0.000355054	135380	M35977.metal.pos.txt	Unknown	Unknown	Shin	6901	#N/A	2701	0.151161	No	No	No
750	M35159	cysteine-glutathione disulfide	cysteine-glutathione disulfide	0.001	0.363526	6.14693e-05	856	M35159.metal.pos.txt	Amino acid	Glutathione Metabolism	Shin	1982	HMDB0000656	5866	0.430765	No	No	No
751		cysteine-glutathione disulfide	cysteine-glutathione disulfide	0.05	0.382762	4.48748e-05	22465	M35159.metal.pos.txt	Amino acid	Glutathione Metabolism	Shin	1982	HMDB0000656	6025	0.44159	No	No	No
752		cysteine-glutathione disulfide	cysteine-glutathione disulfide	0.1	0.401431	3.14438e-05	39529	M35159.metal.pos.txt	Amino acid	Glutathione Metabolism	Shin	1982	HMDB0000656	6182	0.451366	No	No	No
753		cysteine-glutathione disulfide	cysteine-glutathione disulfide	0.2	0.417528	2.18746e-05	68525	M35159.metal.pos.txt	Amino acid	Glutathione Metabolism	Shin	1982	HMDB0000656	6312	0.459797	No	No	No
754		cysteine-glutathione disulfide	cysteine-glutathione disulfide	0.3	0.229424	0.000276806	93704	M35159.metal.pos.txt	Amino acid	Glutathione Metabolism	Shin	1982	HMDB0000656	4691	0.339954	No	No	No
755		cysteine-glutathione disulfide	cysteine-glutathione disulfide	0.4	0.200263	0.000356518	115950	M35159.metal.pos.txt	Amino acid	Glutathione Metabolism	Shin	1982	HMDB0000656	4418	0.315081	No	No	No
756		cysteine-glutathione disulfide	cysteine-glutathione disulfide	0.5	0.160626	0.000496267	135386	M35159.metal.pos.txt	Amino acid	Glutathione Metabolism	Shin	1982	HMDB0000656	4015	0.278084	No	No	No
757	M33420	gamma-tocopherol	gamma-tocopherol	0.001	0.0102182	0.000922665	857	M33420.metal.pos.txt	Cofactors and vitamins	Tocopherol Metabolism	Shin	5822	HMDB0001492	1420	0.0500186	No	No	No
758		gamma-tocopherol	gamma-tocopherol	0.05	0.331783	3.25006e-05	22459	M33420.metal.pos.txt	Cofactors and vitamins	Tocopherol Metabolism	Shin	5822	HMDB0001492	5602	0.411678	No	No	No
759		gamma-tocopherol	gamma-tocopherol	0.1	0.330845	3.28882e-05	39518	M33420.metal.pos.txt	Cofactors and vitamins	Tocopherol Metabolism	Shin	5822	HMDB0001492	5591	0.411322	No	No	No
760		gamma-tocopherol	gamma-tocopherol	0.2	0.355522	2.35716e-05	68495	M33420.metal.pos.txt	Cofactors and vitamins	Tocopherol Metabolism	Shin	5822	HMDB0001492	5807	0.425562	No	No	No
761		gamma-tocopherol	gamma-tocopherol	0.3	0.161795	0.000167348	93668	M33420.metal.pos.txt	Cofactors and vitamins	Tocopherol Metabolism	Shin	5822	HMDB0001492	4022	0.279622	No	No	No
762		gamma-tocopherol	gamma-tocopherol	0.4	0.07348	0.000361241	115922	M33420.metal.pos.txt	Cofactors and vitamins	Tocopherol Metabolism	Shin	5822	HMDB0001492	2921	0.174858	No	No	No
763		gamma-tocopherol	gamma-tocopherol	0.5	0.12043	0.00023624	135346	M33420.metal.pos.txt	Cofactors and vitamins	Tocopherol Metabolism	Shin	5822	HMDB0001492	3545	0.236138	No	No	No
764	IL13	Interleukin-13	IL-13	0.001	0.174498	0.000246556	1998	IL13	Cytokine	#N/A	Ahola-Olli	3557	#N/A	4159	0.29164	No	No	No
765		Interleukin-13	IL-13	0.05	0.105602	0.00043936	58721	IL13	Cytokine	#N/A	Ahola-Olli	3557	#N/A	3348	0.219248	No	No	No
766		Interleukin-13	IL-13	0.1	0.0837004	0.00053572	105437	IL13	Cytokine	#N/A	Ahola-Olli	3557	#N/A	3073	0.189327	No	No	No
767		Interleukin-13	IL-13	0.2	0.122741	0.000379135	188102	IL13	Cytokine	#N/A	Ahola-Olli	3557	#N/A	3573	0.238783	No	No	No
768		Interleukin-13	IL-13	0.3	0.126635	0.000366865	260075	IL13	Cytokine	#N/A	Ahola-Olli	3557	#N/A	3628	0.242623	No	No	No
769		Interleukin-13	IL-13	0.4	0.0568831	0.000702904	324757	IL13	Cytokine	#N/A	Ahola-Olli	3557	#N/A	2663	0.148477	No	No	No
770		Interleukin-13	IL-13	0.5	0.0662284	0.00063614	382339	IL13	Cytokine	#N/A	Ahola-Olli	3557	#N/A	2821	0.163188	No	No	No
771	normres_TAG54_9_imputed_complete_CHARGE.csv_TS_Oct2018.so_RAW.txt	TAG 54:9	TAG 54:9	0.001	0.118399	0.000778524	942	normres_TAG54_9_imputed_complete_CHARGE.csv	Lipid	Triacylglycerol	Rhee	1797	#N/A	3520	0.233805	No	No	No
772		TAG 54:9	TAG 54:9	0.05	0.194197	0.000413918	25643	normres_TAG54_9_imputed_complete_CHARGE.csv	Lipid	Triacylglycerol	Rhee	1797	#N/A	4354	0.310028	No	No	No
773		TAG 54:9	TAG 54:9	0.1	0.033449	0.00186667	45471	normres_TAG54_9_imputed_complete_CHARGE.csv	Lipid	Triacylglycerol	Rhee	1797	#N/A	2131	0.109106	No	No	No
774		TAG 54:9	TAG 54:9	0.2	0.0219003	0.00225912	79790	normres_TAG54_9_imputed_complete_CHARGE.csv	Lipid	Triacylglycerol	Rhee	1797	#N/A	1836	0.0829134	No	No	No
775		TAG 54:9	TAG 54:9	0.3	0.0111028	0.00290596	109794	normres_TAG54_9_imputed_complete_CHARGE.csv	Lipid	Triacylglycerol	Rhee	1797	#N/A	1462	0.0527875	No	No	No
776		TAG 54:9	TAG 54:9	0.4	0.0304189	0.00195379	136596	normres_TAG54_9_imputed_complete_CHARGE.csv	Lipid	Triacylglycerol	Rhee	1797	#N/A	2058	0.102741	No	No	No
777		TAG 54:9	TAG 54:9	0.5	0.0464486	0.00156996	160355	normres_TAG54_9_imputed_complete_CHARGE.csv	Lipid	Triacylglycerol	Rhee	1797	#N/A	2458	0.131352	No	No	No
778	M33910	X-12465	X-12465	0.001	0.457022	2.10533e-06	857	M33910.metal.pos.txt	Unknown	Unknown	Shin	5534	#N/A	6634	0.47886	No	No	No
779		X-12465	X-12465	0.05	0.44946	2.91569e-06	22460	M33910.metal.pos.txt	Unknown	Unknown	Shin	5534	#N/A	6566	0.475814	No	No	No
780		X-12465	X-12465	0.1	0.498568	2.32874e-09	39522	M33910.metal.pos.txt	Unknown	Unknown	Shin	5534	#N/A	6938	0.499502	No	No	No
781		X-12465	X-12465	0.2	0.329705	3.50989e-05	68523	M33910.metal.pos.txt	Unknown	Unknown	Shin	5534	#N/A	5583	0.410493	No	No	No
782		X-12465	X-12465	0.3	0.331099	3.44887e-05	93702	M33910.metal.pos.txt	Unknown	Unknown	Shin	5534	#N/A	5593	0.411491	No	No	No
783		X-12465	X-12465	0.4	0.186479	0.000143427	115943	M33910.metal.pos.txt	Unknown	Unknown	Shin	5534	#N/A	4280	0.302854	No	No	No
784		X-12465	X-12465	0.5	0.147652	0.000197899	135386	M33910.metal.pos.txt	Unknown	Unknown	Shin	5534	#N/A	3870	0.265201	No	No	No
785	MetaAnalysis_C14.1.OH_HetISqLt75_HetDfGt0_HWEPValGt1EMinus6.tsv.fixed_TS_Oct2018.so_RAW.txt	tetradecenoylcarnitine	C14:1	0.001	0.116677	0.000777943	794	MetaAnalysis_C14.1.OH_HetISqLt75_HetDfGt0_HWEPValGt1EMinus6.tsv.fixed	Lipid	Fatty Acid Metabolism(Acyl Carnitine)	Draaisma	7475	HMDB0258884	3498	0.231853	No	No	No
786		tetradecenoylcarnitine	C14:1	0.05	0.073043	0.00115695	20653	MetaAnalysis_C14.1.OH_HetISqLt75_HetDfGt0_HWEPValGt1EMinus6.tsv.fixed	Lipid	Fatty Acid Metabolism(Acyl Carnitine)	Draaisma	7475	HMDB0258884	2914	0.174235	No	No	No
787		tetradecenoylcarnitine	C14:1	0.1	0.0872051	0.00101024	36163	MetaAnalysis_C14.1.OH_HetISqLt75_HetDfGt0_HWEPValGt1EMinus6.tsv.fixed	Lipid	Fatty Acid Metabolism(Acyl Carnitine)	Draaisma	7475	HMDB0258884	3121	0.194221	No	No	No
788		tetradecenoylcarnitine	C14:1	0.2	0.159676	0.000543193	62541	MetaAnalysis_C14.1.OH_HetISqLt75_HetDfGt0_HWEPValGt1EMinus6.tsv.fixed	Lipid	Fatty Acid Metabolism(Acyl Carnitine)	Draaisma	7475	HMDB0258884	4007	0.276993	No	No	No
789		tetradecenoylcarnitine	C14:1	0.3	0.306447	0.000140254	85340	MetaAnalysis_C14.1.OH_HetISqLt75_HetDfGt0_HWEPValGt1EMinus6.tsv.fixed	Lipid	Fatty Acid Metabolism(Acyl Carnitine)	Draaisma	7475	HMDB0258884	5375	0.396301	No	No	No
790		tetradecenoylcarnitine	C14:1	0.4	0.49096	2.81384e-07	105411	MetaAnalysis_C14.1.OH_HetISqLt75_HetDfGt0_HWEPValGt1EMinus6.tsv.fixed	Lipid	Fatty Acid Metabolism(Acyl Carnitine)	Draaisma	7475	HMDB0258884	6889	0.495379	No	No	No
791		tetradecenoylcarnitine	C14:1	0.5	0.489154	4.05079e-07	122967	MetaAnalysis_C14.1.OH_HetISqLt75_HetDfGt0_HWEPValGt1EMinus6.tsv.fixed	Lipid	Fatty Acid Metabolism(Acyl Carnitine)	Draaisma	7475	HMDB0258884	6873	0.494706	No	No	No
792	MetaAnalysis_lysoPC.a.C16.0_HetISqLt75_HetDfGt0_HWEPValGt1EMinus6.tsv.fixed_TS_Oct2018.so_RAW.txt	lysoPhosphatidylcholine acyl C16:0	lysoPC a C16:0	0.001	0.0801552	0.000263649	937	MetaAnalysis_lysoPC.a.C16.0_HetISqLt75_HetDfGt0_HWEPValGt1EMinus6.tsv.fixed	Lipid	Glycerophospholipids	Draaisma	7476	#N/A	3018	0.184612	No	No	No
793		lysoPhosphatidylcholine acyl C16:0	lysoPC a C16:0	0.05	0.398806	8.79615e-06	24957	MetaAnalysis_lysoPC.a.C16.0_HetISqLt75_HetDfGt0_HWEPValGt1EMinus6.tsv.fixed	Lipid	Glycerophospholipids	Draaisma	7476	#N/A	6154	0.450456	No	No	No
794		lysoPhosphatidylcholine acyl C16:0	lysoPC a C16:0	0.1	0.238121	6.78756e-05	44045	MetaAnalysis_lysoPC.a.C16.0_HetISqLt75_HetDfGt0_HWEPValGt1EMinus6.tsv.fixed	Lipid	Glycerophospholipids	Draaisma	7476	#N/A	4762	0.347581	No	No	No
795		lysoPhosphatidylcholine acyl C16:0	lysoPC a C16:0	0.2	0.332946	2.49388e-05	76935	MetaAnalysis_lysoPC.a.C16.0_HetISqLt75_HetDfGt0_HWEPValGt1EMinus6.tsv.fixed	Lipid	Glycerophospholipids	Draaisma	7476	#N/A	5617	0.412018	No	No	No
796		lysoPhosphatidylcholine acyl C16:0	lysoPC a C16:0	0.3	0.29889	3.72328e-05	105544	MetaAnalysis_lysoPC.a.C16.0_HetISqLt75_HetDfGt0_HWEPValGt1EMinus6.tsv.fixed	Lipid	Glycerophospholipids	Draaisma	7476	#N/A	5314	0.390964	No	No	No
797		lysoPhosphatidylcholine acyl C16:0	lysoPC a C16:0	0.4	0.302031	3.59695e-05	130968	MetaAnalysis_lysoPC.a.C16.0_HetISqLt75_HetDfGt0_HWEPValGt1EMinus6.tsv.fixed	Lipid	Glycerophospholipids	Draaisma	7476	#N/A	5341	0.393076	No	No	No
798		lysoPhosphatidylcholine acyl C16:0	lysoPC a C16:0	0.5	0.241221	6.59872e-05	153374	MetaAnalysis_lysoPC.a.C16.0_HetISqLt75_HetDfGt0_HWEPValGt1EMinus6.tsv.fixed	Lipid	Glycerophospholipids	Draaisma	7476	#N/A	4781	0.350707	No	No	No
799	Summary_statistics_MAGNETIC_Ace.txt_TS_Oct2018.so_RAW.txt	acetate	Ace	0.001	0.105445	6.32478e-05	2250	Summary_statistics_MAGNETIC_Ace.txt	Lipid	Short Chain Fatty Acid	Kettunen	24748	HMDB0000042	3346	0.219052	No	No	No
800		acetate	Ace	0.05	0.190324	3.1057e-05	68869	Summary_statistics_MAGNETIC_Ace.txt	Lipid	Short Chain Fatty Acid	Kettunen	24748	HMDB0000042	4318	0.306378	No	No	No
801		acetate	Ace	0.1	0.20859	2.65975e-05	124785	Summary_statistics_MAGNETIC_Ace.txt	Lipid	Short Chain Fatty Acid	Kettunen	24748	HMDB0000042	4488	0.323064	No	No	No
802		acetate	Ace	0.2	0.0732976	8.51478e-05	224374	Summary_statistics_MAGNETIC_Ace.txt	Lipid	Short Chain Fatty Acid	Kettunen	24748	HMDB0000042	2917	0.174663	No	No	No
803		acetate	Ace	0.3	0.034123	0.000134334	312336	Summary_statistics_MAGNETIC_Ace.txt	Lipid	Short Chain Fatty Acid	Kettunen	24748	HMDB0000042	2150	0.11032	No	No	No
804		acetate	Ace	0.4	0.0231005	0.000160576	391843	Summary_statistics_MAGNETIC_Ace.txt	Lipid	Short Chain Fatty Acid	Kettunen	24748	HMDB0000042	1874	0.085684	No	No	No
805		acetate	Ace	0.5	0.0178222	0.000178343	462982	Summary_statistics_MAGNETIC_Ace.txt	Lipid	Short Chain Fatty Acid	Kettunen	24748	HMDB0000042	1694	0.0731299	No	No	No
806	normres_arginine_imputed_complete_CHARGE.csv_TS_Oct2018.so_RAW.txt	arginine	Arg	0.001	0.148812	0.000601824	942	normres_arginine_imputed_complete_CHARGE.csv	Amino acid	Urea cycle; Arginine and Proline Metabolism	Rhee	1802	HMDB0000517	3887	0.266115	No	No	No
807		arginine	Arg	0.05	0.111309	0.000825087	25643	normres_arginine_imputed_complete_CHARGE.csv	Amino acid	Urea cycle; Arginine and Proline Metabolism	Rhee	1802	HMDB0000517	3424	0.225966	No	No	No
808		arginine	Arg	0.1	0.00210008	0.0045375	45471	normres_arginine_imputed_complete_CHARGE.csv	Amino acid	Urea cycle; Arginine and Proline Metabolism	Rhee	1802	HMDB0000517	853	0.0171133	Yes	No	No
809		arginine	Arg	0.2	0.00112886	0.00516268	79790	normres_arginine_imputed_complete_CHARGE.csv	Amino acid	Urea cycle; Arginine and Proline Metabolism	Rhee	1802	HMDB0000517	691	0.0113556	Yes	No	No
810		arginine	Arg	0.3	0.000949817	0.00533758	109794	normres_arginine_imputed_complete_CHARGE.csv	Amino acid	Urea cycle; Arginine and Proline Metabolism	Rhee	1802	HMDB0000517	657	0.010049	Yes	No	No
811		arginine	Arg	0.4	0.00236445	0.00441879	136596	normres_arginine_imputed_complete_CHARGE.csv	Amino acid	Urea cycle; Arginine and Proline Metabolism	Rhee	1802	HMDB0000517	893	0.0184046	Yes	No	No
812		arginine	Arg	0.5	0.00733264	0.00329989	160355	normres_arginine_imputed_complete_CHARGE.csv	Amino acid	Urea cycle; Arginine and Proline Metabolism	Rhee	1802	HMDB0000517	1274	0.0400072	Yes	No	No
813	M12768	X-03088	X-03088	0.001	0.243482	6.86965e-05	856	M12768.metal.pos.txt	Unknown	Unknown	Shin	7034	#N/A	4802	0.352445	No	No	No
814		X-03088	X-03088	0.05	0.285268	4.57461e-05	22465	M12768.metal.pos.txt	Unknown	Unknown	Shin	7034	#N/A	5194	0.381767	No	No	No
815		X-03088	X-03088	0.1	0.458347	1.55547e-06	39530	M12768.metal.pos.txt	Unknown	Unknown	Shin	7034	#N/A	6645	0.479453	No	No	No
816		X-03088	X-03088	0.2	0.23956	7.1204e-05	68521	M12768.metal.pos.txt	Unknown	Unknown	Shin	7034	#N/A	4769	0.349167	No	No	No
817		X-03088	X-03088	0.3	0.268454	5.42069e-05	93698	M12768.metal.pos.txt	Unknown	Unknown	Shin	7034	#N/A	5035	0.37061	No	No	No
818		X-03088	X-03088	0.4	0.250754	6.4221e-05	115955	M12768.metal.pos.txt	Unknown	Unknown	Shin	7034	#N/A	4876	0.357463	No	No	No
819		X-03088	X-03088	0.5	0.25065	6.42835e-05	135383	M12768.metal.pos.txt	Unknown	Unknown	Shin	7034	#N/A	4873	0.357534	No	No	No
820	M32863	X-11546	X-11546	0.001	0.0146178	0.00238833	856	M32863.metal.pos.txt	Unknown	Unknown	Shin	1988	#N/A	1590	0.0639045	No	No	No
821		X-11546	X-11546	0.05	0.249003	0.000230951	22461	M32863.metal.pos.txt	Unknown	Unknown	Shin	1988	#N/A	4860	0.356136	No	No	No
822		X-11546	X-11546	0.1	0.233441	0.000266234	39523	M32863.metal.pos.txt	Unknown	Unknown	Shin	1988	#N/A	4731	0.342983	No	No	No
823		X-11546	X-11546	0.2	0.213481	0.000317392	68523	M32863.metal.pos.txt	Unknown	Unknown	Shin	1988	#N/A	4528	0.327717	No	No	No
824		X-11546	X-11546	0.3	0.238022	0.000255457	93695	M32863.metal.pos.txt	Unknown	Unknown	Shin	1988	#N/A	4761	0.347509	No	No	No
825		X-11546	X-11546	0.4	0.210889	0.000324573	115938	M32863.metal.pos.txt	Unknown	Unknown	Shin	1988	#N/A	4509	0.325103	No	No	No
826		X-11546	X-11546	0.5	0.197973	0.00036241	135385	M32863.metal.pos.txt	Unknown	Unknown	Shin	1988	#N/A	4390	0.313465	No	No	No
827	normres_methionine_imputed_complete_CHARGE.csv_TS_Oct2018.so_RAW.txt	methionine	Met	0.001	0.439125	1.30222e-05	942	normres_methionine_imputed_complete_CHARGE.csv	Amino acid	Methionine, Cysteine, SAM and Taurine Metabolism	Rhee	1802	HMDB0000696	6488	0.470463	No	No	No
828		methionine	Met	0.05	0.418326	2.35898e-05	25637	normres_methionine_imputed_complete_CHARGE.csv	Amino acid	Methionine, Cysteine, SAM and Taurine Metabolism	Rhee	1802	HMDB0000696	6316	0.460384	No	No	No
829		methionine	Met	0.1	0.110374	0.000831783	45456	normres_methionine_imputed_complete_CHARGE.csv	Amino acid	Methionine, Cysteine, SAM and Taurine Metabolism	Rhee	1802	HMDB0000696	3405	0.225319	No	No	No
830		methionine	Met	0.2	0.148186	0.000604948	79771	normres_methionine_imputed_complete_CHARGE.csv	Amino acid	Methionine, Cysteine, SAM and Taurine Metabolism	Rhee	1802	HMDB0000696	3878	0.265612	No	No	No
831		methionine	Met	0.3	0.0553097	0.00141152	109773	normres_methionine_imputed_complete_CHARGE.csv	Amino acid	Methionine, Cysteine, SAM and Taurine Metabolism	Rhee	1802	HMDB0000696	2634	0.14596	No	No	No
832		methionine	Met	0.4	0.0301247	0.0019573	136569	normres_methionine_imputed_complete_CHARGE.csv	Amino acid	Methionine, Cysteine, SAM and Taurine Metabolism	Rhee	1802	HMDB0000696	2050	0.102145	No	No	No
833		methionine	Met	0.5	0.0361647	0.00179049	160320	normres_methionine_imputed_complete_CHARGE.csv	Amino acid	Methionine, Cysteine, SAM and Taurine Metabolism	Rhee	1802	HMDB0000696	2207	0.113902	No	No	No
834	Summary_statistics_MAGNETIC_S.VLDL.P.txt_TS_Oct2018.so_RAW.txt	concentration,of,small,vldl,particles	S.VLDL.P	0.001	0.185855	4.1401e-05	2242	Summary_statistics_MAGNETIC_S.VLDL.P.txt	Lipid	Lipid ratios	Kettunen	19273	#N/A	4275	0.302194	No	No	No
835		concentration,of,small,vldl,particles	S.VLDL.P	0.05	0.0747833	0.000107744	68619	Summary_statistics_MAGNETIC_S.VLDL.P.txt	Lipid	Lipid ratios	Kettunen	19273	#N/A	2946	0.176449	No	No	No
836		concentration,of,small,vldl,particles	S.VLDL.P	0.1	0.0268199	0.000193199	124293	Summary_statistics_MAGNETIC_S.VLDL.P.txt	Lipid	Lipid ratios	Kettunen	19273	#N/A	1967	0.0947763	No	No	No
837		concentration,of,small,vldl,particles	S.VLDL.P	0.2	0.00606935	0.000326336	223380	Summary_statistics_MAGNETIC_S.VLDL.P.txt	Lipid	Lipid ratios	Kettunen	19273	#N/A	1195	0.0353038	Yes	No	No
838		concentration,of,small,vldl,particles	S.VLDL.P	0.3	0.00597269	0.000327812	310902	Summary_statistics_MAGNETIC_S.VLDL.P.txt	Lipid	Lipid ratios	Kettunen	19273	#N/A	1189	0.0349169	Yes	No	No
839		concentration,of,small,vldl,particles	S.VLDL.P	0.4	0.00414889	0.000361479	390059	Summary_statistics_MAGNETIC_S.VLDL.P.txt	Lipid	Lipid ratios	Kettunen	19273	#N/A	1066	0.0270534	Yes	No	No
840		concentration,of,small,vldl,particles	S.VLDL.P	0.5	0.00333913	0.00038168	460876	Summary_statistics_MAGNETIC_S.VLDL.P.txt	Lipid	Lipid ratios	Kettunen	19273	#N/A	986	0.0235398	Yes	No	No
841	Eotaxin	Eotaxin (CCL11)	Eotaxin	0.001	0.266655	4.75988e-05	2029	Eotaxin	Cytokine	#N/A	Ahola-Olli	8153	#N/A	5017	0.369447	No	No	No
842		Eotaxin (CCL11)	Eotaxin	0.05	0.219226	7.36302e-05	60045	Eotaxin	Cytokine	#N/A	Ahola-Olli	8153	#N/A	4586	0.332281	No	No	No
843		Eotaxin (CCL11)	Eotaxin	0.1	0.0695281	0.000268377	108030	Eotaxin	Cytokine	#N/A	Ahola-Olli	8153	#N/A	2865	0.168687	No	No	No
844		Eotaxin (CCL11)	Eotaxin	0.2	0.00986415	0.000666499	192861	Eotaxin	Cytokine	#N/A	Ahola-Olli	8153	#N/A	1407	0.0487318	Yes	No	No
845		Eotaxin (CCL11)	Eotaxin	0.3	0.00688012	0.000744068	266876	Eotaxin	Cytokine	#N/A	Ahola-Olli	8153	#N/A	1237	0.038661	Yes	No	No
846		Eotaxin (CCL11)	Eotaxin	0.4	0.00220246	0.000994093	333421	Eotaxin	Cytokine	#N/A	Ahola-Olli	8153	#N/A	867	0.0176578	Yes	No	No
847		Eotaxin (CCL11)	Eotaxin	0.5	0.00162418	0.00106192	392766	Eotaxin	Cytokine	#N/A	Ahola-Olli	8153	#N/A	780	0.0144739	Yes	No	No
848	M34912	X-13215	X-13215	0.001	0.00150515	0.00149442	857	M34912.metal.pos.txt	Unknown	Unknown	Shin	5885	#N/A	764	0.0136941	Yes	No	No
849		X-13215	X-13215	0.05	0.00605527	0.00106903	22459	M34912.metal.pos.txt	Unknown	Unknown	Shin	5885	#N/A	1192	0.0353106	Yes	No	No
850		X-13215	X-13215	0.1	0.0211806	0.000699961	39517	M34912.metal.pos.txt	Unknown	Unknown	Shin	5885	#N/A	1811	0.0812956	No	No	No
851		X-13215	X-13215	0.2	0.0283795	0.000616571	68506	M34912.metal.pos.txt	Unknown	Unknown	Shin	5885	#N/A	2014	0.0979474	No	No	No
852		X-13215	X-13215	0.3	0.0160466	0.000780242	93655	M34912.metal.pos.txt	Unknown	Unknown	Shin	5885	#N/A	1631	0.0683873	No	No	No
853		X-13215	X-13215	0.4	0.0340578	0.000565321	115887	M34912.metal.pos.txt	Unknown	Unknown	Shin	5885	#N/A	2149	0.110161	No	No	No
854		X-13215	X-13215	0.5	0.0349752	0.000557905	135312	M34912.metal.pos.txt	Unknown	Unknown	Shin	5885	#N/A	2176	0.111725	No	No	No
855	Summary_statistics_MAGNETIC_L.VLDL.TG.txt_TS_Oct2018.so_RAW.txt	triglycerides,in,large,vldl	L.VLDL.TG	0.001	0.395932	3.27879e-06	2243	Summary_statistics_MAGNETIC_L.VLDL.TG.txt	Lipid	Lipid ratios	Kettunen	21239	#N/A	6138	0.448375	No	No	No
856		triglycerides,in,large,vldl	L.VLDL.TG	0.05	0.412594	2.29703e-06	68597	Summary_statistics_MAGNETIC_L.VLDL.TG.txt	Lipid	Lipid ratios	Kettunen	21239	#N/A	6274	0.457115	No	No	No
857		triglycerides,in,large,vldl	L.VLDL.TG	0.1	0.312941	1.1191e-05	124235	Summary_statistics_MAGNETIC_L.VLDL.TG.txt	Lipid	Lipid ratios	Kettunen	21239	#N/A	5425	0.400968	No	No	No
858		triglycerides,in,large,vldl	L.VLDL.TG	0.2	0.336279	8.41022e-06	223300	Summary_statistics_MAGNETIC_L.VLDL.TG.txt	Lipid	Lipid ratios	Kettunen	21239	#N/A	5653	0.413492	No	No	No
859		triglycerides,in,large,vldl	L.VLDL.TG	0.3	0.408819	2.50334e-06	310770	Summary_statistics_MAGNETIC_L.VLDL.TG.txt	Lipid	Lipid ratios	Kettunen	21239	#N/A	6232	0.455986	No	No	No
860		triglycerides,in,large,vldl	L.VLDL.TG	0.4	0.328491	9.28528e-06	389856	Summary_statistics_MAGNETIC_L.VLDL.TG.txt	Lipid	Lipid ratios	Kettunen	21239	#N/A	5566	0.41023	No	No	No
861		triglycerides,in,large,vldl	L.VLDL.TG	0.5	0.407615	2.57114e-06	460593	Summary_statistics_MAGNETIC_L.VLDL.TG.txt	Lipid	Lipid ratios	Kettunen	21239	#N/A	6224	0.455227	No	No	No
862	M34499	X-12816	X-12816	0.001	0.00946802	0.00128116	856	M34499.metal.pos.txt	Unknown	Unknown	Shin	4296	#N/A	1386	0.0474835	Yes	No	No
863		X-12816	X-12816	0.05	0.324558	4.81868e-05	22460	M34499.metal.pos.txt	Unknown	Unknown	Shin	4296	#N/A	5535	0.407589	No	No	No
864		X-12816	X-12816	0.1	0.48756	2.26424e-07	39518	M34499.metal.pos.txt	Unknown	Unknown	Shin	4296	#N/A	6864	0.493739	No	No	No
865		X-12816	X-12816	0.2	0.377091	2.28234e-05	68491	M34499.metal.pos.txt	Unknown	Unknown	Shin	4296	#N/A	5987	0.437808	No	No	No
866		X-12816	X-12816	0.3	0.446235	4.25355e-06	93654	M34499.metal.pos.txt	Unknown	Unknown	Shin	4296	#N/A	6539	0.474351	No	No	No
867		X-12816	X-12816	0.4	0.430913	7.05155e-06	115897	M34499.metal.pos.txt	Unknown	Unknown	Shin	4296	#N/A	6428	0.465973	No	No	No
868		X-12816	X-12816	0.5	0.458663	2.50813e-06	135314	M34499.metal.pos.txt	Unknown	Unknown	Shin	4296	#N/A	6650	0.479424	No	No	No
869	M33507	X-12092	X-12092	0.001	0.434553	3.83084e-06	856	M33507.metal.pos.txt	Unknown	Unknown	Shin	7089	#N/A	6455	0.467944	No	No	No
870		X-12092	X-12092	0.05	0.323574	2.95545e-05	22462	M33507.metal.pos.txt	Unknown	Unknown	Shin	7089	#N/A	5522	0.407309	No	No	No
871		X-12092	X-12092	0.1	0.380938	1.29524e-05	39524	M33507.metal.pos.txt	Unknown	Unknown	Shin	7089	#N/A	6013	0.440363	No	No	No
872		X-12092	X-12092	0.2	0.371061	1.52729e-05	68516	M33507.metal.pos.txt	Unknown	Unknown	Shin	7089	#N/A	5939	0.434289	No	No	No
873		X-12092	X-12092	0.3	0.361751	1.76556e-05	93686	M33507.metal.pos.txt	Unknown	Unknown	Shin	7089	#N/A	5849	0.429908	No	No	No
874		X-12092	X-12092	0.4	0.321323	3.03703e-05	115939	M33507.metal.pos.txt	Unknown	Unknown	Shin	7089	#N/A	5504	0.405799	No	No	No
875		X-12092	X-12092	0.5	0.491306	6.70117e-08	135374	M33507.metal.pos.txt	Unknown	Unknown	Shin	7089	#N/A	6892	0.495511	No	No	No
876	M34513	X-12830	X-12830	0.001	0.0426425	0.000913812	854	M34513.metal.pos.txt	Unknown	Unknown	Shin	3239	#N/A	2378	0.124646	No	No	No
877		X-12830	X-12830	0.05	0.000879895	0.00301631	22452	M34513.metal.pos.txt	Unknown	Unknown	Shin	3239	#N/A	644	0.00949713	Yes	Yes	No
878		X-12830	X-12830	0.1	0.00145493	0.00273264	39515	M34513.metal.pos.txt	Unknown	Unknown	Shin	3239	#N/A	753	0.0134306	Yes	No	No
879		X-12830	X-12830	0.2	0.000247528	0.00373927	68508	M34513.metal.pos.txt	Unknown	Unknown	Shin	3239	#N/A	427	0.00402943	Yes	Yes	No
880		X-12830	X-12830	0.3	5.75821e-05	0.00458048	93694	M34513.metal.pos.txt	Unknown	Unknown	Shin	3239	#N/A	244	0.00164038	Yes	Yes	No
881		X-12830	X-12830	0.4	3.85187e-05	0.00481383	115939	M34513.metal.pos.txt	Unknown	Unknown	Shin	3239	#N/A	209	0.00128107	Yes	Yes	No
882		X-12830	X-12830	0.5	1.57431e-05	0.00533488	135379	M34513.metal.pos.txt	Unknown	Unknown	Shin	3239	#N/A	143	0.000765247	Yes	Yes	No
883	normres_taurocholate_imputed_complete_CHARGE.csv_TS_Oct2018.so_RAW.txt	taurocholate	taurocholate	0.001	0.41995	3.71021e-05	942	normres_taurocholate_imputed_complete_CHARGE.csv	Lipid	Primary Bile Acid Metabolism	Rhee	1100	HMDB0000036	6335	0.460784	No	No	No
884		taurocholate	taurocholate	0.05	0.202457	0.000630424	25642	normres_taurocholate_imputed_complete_CHARGE.csv	Lipid	Primary Bile Acid Metabolism	Rhee	1100	HMDB0000036	4436	0.31724	No	No	No
885		taurocholate	taurocholate	0.1	0.456161	1.1022e-05	45470	normres_taurocholate_imputed_complete_CHARGE.csv	Lipid	Primary Bile Acid Metabolism	Rhee	1100	HMDB0000036	6627	0.478463	No	No	No
886		taurocholate	taurocholate	0.2	0.161125	0.000890325	79787	normres_taurocholate_imputed_complete_CHARGE.csv	Lipid	Primary Bile Acid Metabolism	Rhee	1100	HMDB0000036	4018	0.27874	No	No	No
887		taurocholate	taurocholate	0.3	0.41906	3.79428e-05	109788	normres_taurocholate_imputed_complete_CHARGE.csv	Lipid	Primary Bile Acid Metabolism	Rhee	1100	HMDB0000036	6323	0.460681	No	No	No
888		taurocholate	taurocholate	0.4	0.313212	0.000215377	136587	normres_taurocholate_imputed_complete_CHARGE.csv	Lipid	Primary Bile Acid Metabolism	Rhee	1100	HMDB0000036	5427	0.401168	No	No	No
889		taurocholate	taurocholate	0.5	0.264726	0.00035943	160345	normres_taurocholate_imputed_complete_CHARGE.csv	Lipid	Primary Bile Acid Metabolism	Rhee	1100	HMDB0000036	5002	0.367875	No	No	No
890	Summary_statistics_MAGNETIC_M.VLDL.FC.txt_TS_Oct2018.so_RAW.txt	free,cholesterol,in,medium,vldl	M.VLDL.FC	0.001	0.291936	1.41249e-05	2243	Summary_statistics_MAGNETIC_M.VLDL.FC.txt	Lipid	Lipid ratios	Kettunen	21240	#N/A	5249	0.386597	No	No	No
891		free,cholesterol,in,medium,vldl	M.VLDL.FC	0.05	0.208579	3.09933e-05	68605	Summary_statistics_MAGNETIC_M.VLDL.FC.txt	Lipid	Lipid ratios	Kettunen	21240	#N/A	4487	0.323118	No	No	No
892		free,cholesterol,in,medium,vldl	M.VLDL.FC	0.1	0.208546	3.1002e-05	124251	Summary_statistics_MAGNETIC_M.VLDL.FC.txt	Lipid	Lipid ratios	Kettunen	21240	#N/A	4486	0.32314	No	No	No
893		free,cholesterol,in,medium,vldl	M.VLDL.FC	0.2	0.104015	7.46247e-05	223339	Summary_statistics_MAGNETIC_M.VLDL.FC.txt	Lipid	Lipid ratios	Kettunen	21240	#N/A	3331	0.217054	No	No	No
894		free,cholesterol,in,medium,vldl	M.VLDL.FC	0.3	0.0825958	9.06761e-05	310824	Summary_statistics_MAGNETIC_M.VLDL.FC.txt	Lipid	Lipid ratios	Kettunen	21240	#N/A	3056	0.187868	No	No	No
895		free,cholesterol,in,medium,vldl	M.VLDL.FC	0.4	0.084259	8.92652e-05	389932	Summary_statistics_MAGNETIC_M.VLDL.FC.txt	Lipid	Lipid ratios	Kettunen	21240	#N/A	3083	0.189972	No	No	No
896		free,cholesterol,in,medium,vldl	M.VLDL.FC	0.5	0.057731	0.000116652	460694	Summary_statistics_MAGNETIC_M.VLDL.FC.txt	Lipid	Lipid ratios	Kettunen	21240	#N/A	2682	0.149623	No	No	No
897	Summary_statistics_MAGNETIC_M.LDL.P.txt_TS_Oct2018.so_RAW.txt	concentration,of,medium,ldl,particles	M.LDL.P	0.001	0.116518	7.37917e-05	2242	Summary_statistics_MAGNETIC_M.LDL.P.txt	Lipid	Lipid ratios	Kettunen	19273	#N/A	3492	0.231934	No	No	No
898		concentration,of,medium,ldl,particles	M.LDL.P	0.05	0.0394271	0.00016023	68616	Summary_statistics_MAGNETIC_M.LDL.P.txt	Lipid	Lipid ratios	Kettunen	19273	#N/A	2301	0.119104	No	No	No
899		concentration,of,medium,ldl,particles	M.LDL.P	0.1	0.00142926	0.000461453	124288	Summary_statistics_MAGNETIC_M.LDL.P.txt	Lipid	Lipid ratios	Kettunen	19273	#N/A	747	0.0132996	Yes	No	No
900		concentration,of,medium,ldl,particles	M.LDL.P	0.2	0.000368292	0.000591046	223372	Summary_statistics_MAGNETIC_M.LDL.P.txt	Lipid	Lipid ratios	Kettunen	19273	#N/A	481	0.00532224	Yes	Yes	No
901		concentration,of,medium,ldl,particles	M.LDL.P	0.3	0.00128712	0.000471381	310894	Summary_statistics_MAGNETIC_M.LDL.P.txt	Lipid	Lipid ratios	Kettunen	19273	#N/A	721	0.0124088	Yes	No	No
902		concentration,of,medium,ldl,particles	M.LDL.P	0.4	0.000719055	0.00052683	390041	Summary_statistics_MAGNETIC_M.LDL.P.txt	Lipid	Lipid ratios	Kettunen	19273	#N/A	603	0.00828881	Yes	Yes	No
903		concentration,of,medium,ldl,particles	M.LDL.P	0.5	0.00154831	0.000453881	460855	Summary_statistics_MAGNETIC_M.LDL.P.txt	Lipid	Lipid ratios	Kettunen	19273	#N/A	769	0.0139952	Yes	No	No
904	normres_pyruvate_imputed_complete_CHARGE.csv_TS_Oct2018.so_RAW.txt	pyruvate	Pyr	0.001	0.35081	0.00013966	942	normres_pyruvate_imputed_complete_CHARGE.csv	Carbohydrate	Glycolysis, Gluconeogenesis, and Pyruvate Metabolism	Rhee	1051	HMDB00243	5780	0.421882	No	No	No
905		pyruvate	Pyr	0.05	0.267615	0.000365729	25642	normres_pyruvate_imputed_complete_CHARGE.csv	Carbohydrate	Glycolysis, Gluconeogenesis, and Pyruvate Metabolism	Rhee	1051	HMDB00243	5027	0.37004	No	No	No
906		pyruvate	Pyr	0.1	0.407649	5.19178e-05	45470	normres_pyruvate_imputed_complete_CHARGE.csv	Carbohydrate	Glycolysis, Gluconeogenesis, and Pyruvate Metabolism	Rhee	1051	HMDB00243	6225	0.455192	No	No	No
907		pyruvate	Pyr	0.2	0.436181	2.45581e-05	79786	normres_pyruvate_imputed_complete_CHARGE.csv	Carbohydrate	Glycolysis, Gluconeogenesis, and Pyruvate Metabolism	Rhee	1051	HMDB00243	6469	0.468681	No	No	No
908		pyruvate	Pyr	0.3	0.371017	0.000103084	109786	normres_pyruvate_imputed_complete_CHARGE.csv	Carbohydrate	Glycolysis, Gluconeogenesis, and Pyruvate Metabolism	Rhee	1051	HMDB00243	5937	0.434385	No	No	No
909		pyruvate	Pyr	0.4	0.487553	9.26567e-07	136584	normres_pyruvate_imputed_complete_CHARGE.csv	Carbohydrate	Glycolysis, Gluconeogenesis, and Pyruvate Metabolism	Rhee	1051	HMDB00243	6863	0.493804	No	No	No
910		pyruvate	Pyr	0.5	0.460648	9.28805e-06	160342	normres_pyruvate_imputed_complete_CHARGE.csv	Carbohydrate	Glycolysis, Gluconeogenesis, and Pyruvate Metabolism	Rhee	1051	HMDB00243	6664	0.480487	No	No	No
911	M32338	glycine	Gly	0.001	0.410002	7.0384e-06	856	M32338.metal.pos.txt	Amino acid	Glycine, Serine and Threonine Metabolism	Shin	7356	HMDB0000123	6249	0.456061	No	No	No
912		glycine	Gly	0.05	0.490926	7.03365e-08	22462	M32338.metal.pos.txt	Amino acid	Glycine, Serine and Threonine Metabolism	Shin	7356	HMDB0000123	6888	0.495416	No	No	No
913		glycine	Gly	0.1	0.204249	9.28678e-05	39526	M32338.metal.pos.txt	Amino acid	Glycine, Serine and Threonine Metabolism	Shin	7356	HMDB0000123	4453	0.318827	No	No	No
914		glycine	Gly	0.2	0.492509	4.79309e-08	68520	M32338.metal.pos.txt	Amino acid	Glycine, Serine and Threonine Metabolism	Shin	7356	HMDB0000123	6898	0.496294	No	No	No
915		glycine	Gly	0.3	0.395436	9.5595e-06	93694	M32338.metal.pos.txt	Amino acid	Glycine, Serine and Threonine Metabolism	Shin	7356	HMDB0000123	6134	0.448105	No	No	No
916		glycine	Gly	0.4	0.309011	3.38027e-05	115944	M32338.metal.pos.txt	Amino acid	Glycine, Serine and Threonine Metabolism	Shin	7356	HMDB0000123	5395	0.398135	No	No	No
917		glycine	Gly	0.5	0.416875	5.98905e-06	135378	M32338.metal.pos.txt	Amino acid	Glycine, Serine and Threonine Metabolism	Shin	7356	HMDB0000123	6304	0.45966	No	No	No
918	M01564	citrate	Cit	0.001	0.100739	0.000221545	856	M01564.metal.pos.txt	Energy	TCA Cycle	Shin	7364	HMDB0000094	3287	0.213031	No	No	No
919		citrate	Cit	0.05	0.00038363	0.00153587	22464	M01564.metal.pos.txt	Energy	TCA Cycle	Shin	7364	HMDB0000094	491	0.00543098	Yes	Yes	No
920		citrate	Cit	0.1	0.000277719	0.00161733	39529	M01564.metal.pos.txt	Energy	TCA Cycle	Shin	7364	HMDB0000094	442	0.00436748	Yes	Yes	No
921		citrate	Cit	0.2	7.34196e-05	0.00195522	68521	M01564.metal.pos.txt	Energy	TCA Cycle	Shin	7364	HMDB0000094	270	0.00189015	Yes	Yes	No
922		citrate	Cit	0.3	5.53037e-05	0.0020276	93696	M01564.metal.pos.txt	Energy	TCA Cycle	Shin	7364	HMDB0000094	238	0.00161519	Yes	Yes	No
923		citrate	Cit	0.4	9.81568e-05	0.00188118	115947	M01564.metal.pos.txt	Energy	TCA Cycle	Shin	7364	HMDB0000094	310	0.00220093	Yes	Yes	No
924		citrate	Cit	0.5	8.76958e-05	0.00190989	135380	M01564.metal.pos.txt	Energy	TCA Cycle	Shin	7364	HMDB0000094	293	0.00208046	Yes	Yes	No
925	M36589	X-14662	X-14662	0.001	0.248829	0.00011564	856	M36589.metal.pos.txt	Unknown	Unknown	Shin	3977	#N/A	4857	0.356107	No	No	No
926		X-14662	X-14662	0.05	0.142426	0.000287562	22464	M36589.metal.pos.txt	Unknown	Unknown	Shin	3977	#N/A	3818	0.259298	No	No	No
927		X-14662	X-14662	0.1	0.381475	2.28733e-05	39525	M36589.metal.pos.txt	Unknown	Unknown	Shin	3977	#N/A	6019	0.440544	No	No	No
928		X-14662	X-14662	0.2	0.28233	8.34007e-05	68522	M36589.metal.pos.txt	Unknown	Unknown	Shin	3977	#N/A	5170	0.37959	No	No	No
929		X-14662	X-14662	0.3	0.162869	0.000242809	93705	M36589.metal.pos.txt	Unknown	Unknown	Shin	3977	#N/A	4038	0.280362	No	No	No
930		X-14662	X-14662	0.4	0.115398	0.000360998	115962	M36589.metal.pos.txt	Unknown	Unknown	Shin	3977	#N/A	3480	0.230498	No	No	No
931		X-14662	X-14662	0.5	0.15671	0.000255489	135397	M36589.metal.pos.txt	Unknown	Unknown	Shin	3977	#N/A	3977	0.273897	No	No	No
932	M33973	epiandrosterone sulfate	epiandrosterone sulfate	0.001	0.198962	9.75374e-05	856	M33973.metal.pos.txt	Lipid	Steroid	Shin	7326	HMDB0002759	4402	0.314171	No	No	No
933		epiandrosterone sulfate	epiandrosterone sulfate	0.05	0.38731	1.11914e-05	22464	M33973.metal.pos.txt	Lipid	Steroid	Shin	7326	HMDB0002759	6058	0.444403	No	No	No
934		epiandrosterone sulfate	epiandrosterone sulfate	0.1	0.276396	4.80931e-05	39526	M33973.metal.pos.txt	Lipid	Steroid	Shin	7326	HMDB0002759	5107	0.376195	No	No	No
935		epiandrosterone sulfate	epiandrosterone sulfate	0.2	0.392682	1.01236e-05	68521	M33973.metal.pos.txt	Lipid	Steroid	Shin	7326	HMDB0002759	6103	0.447245	No	No	No
936		epiandrosterone sulfate	epiandrosterone sulfate	0.3	0.204489	9.30573e-05	93694	M33973.metal.pos.txt	Lipid	Steroid	Shin	7326	HMDB0002759	4459	0.318772	No	No	No
937		epiandrosterone sulfate	epiandrosterone sulfate	0.4	0.0962385	0.000231826	115942	M33973.metal.pos.txt	Lipid	Steroid	Shin	7326	HMDB0002759	3221	0.207685	No	No	No
938		epiandrosterone sulfate	epiandrosterone sulfate	0.5	0.114258	0.000197916	135379	M33973.metal.pos.txt	Lipid	Steroid	Shin	7326	HMDB0002759	3466	0.229142	No	No	No
939	M02132	citrulline	citrulline	0.001	0.32443	2.83054e-05	856	M02132.metal.pos.txt	Amino acid	Urea cycle; Arginine and Proline Metabolism	Shin	7325	HMDB0000904	5533	0.407575	No	No	No
940		citrulline	citrulline	0.05	0.461101	1.30207e-06	22463	M02132.metal.pos.txt	Amino acid	Urea cycle; Arginine and Proline Metabolism	Shin	7325	HMDB0000904	6675	0.480167	No	No	No
941		citrulline	citrulline	0.1	0.0639922	0.000316234	39530	M02132.metal.pos.txt	Amino acid	Urea cycle; Arginine and Proline Metabolism	Shin	7325	HMDB0000904	2791	0.159373	No	No	No
942		citrulline	citrulline	0.2	0.105466	0.000213631	68520	M02132.metal.pos.txt	Amino acid	Urea cycle; Arginine and Proline Metabolism	Shin	7325	HMDB0000904	3347	0.219031	No	No	No
943		citrulline	citrulline	0.3	0.0358893	0.000442479	93696	M02132.metal.pos.txt	Amino acid	Urea cycle; Arginine and Proline Metabolism	Shin	7325	HMDB0000904	2196	0.1136	No	No	No
944		citrulline	citrulline	0.4	0.0519888	0.000360815	115947	M02132.metal.pos.txt	Amino acid	Urea cycle; Arginine and Proline Metabolism	Shin	7325	HMDB0000904	2568	0.140722	No	No	No
945		citrulline	citrulline	0.5	0.0385278	0.000426658	135380	M02132.metal.pos.txt	Amino acid	Urea cycle; Arginine and Proline Metabolism	Shin	7325	HMDB0000904	2278	0.117562	No	No	No
946	M01508	pantothenate	pantothenate	0.001	0.0515823	0.000370871	856	M01508.metal.pos.txt	Cofactors and vitamins	Pantothenate and CoA Metabolism	Shin	7160	HMDB0000210	2556	0.140277	No	No	No
947		pantothenate	pantothenate	0.05	0.113493	0.00020384	22462	M01508.metal.pos.txt	Cofactors and vitamins	Pantothenate and CoA Metabolism	Shin	7160	HMDB0000210	3454	0.2284	No	No	No
948		pantothenate	pantothenate	0.1	0.319829	3.06128e-05	39524	M01508.metal.pos.txt	Cofactors and vitamins	Pantothenate and CoA Metabolism	Shin	7160	HMDB0000210	5493	0.40472	No	No	No
949		pantothenate	pantothenate	0.2	0.380364	1.29518e-05	68518	M01508.metal.pos.txt	Cofactors and vitamins	Pantothenate and CoA Metabolism	Shin	7160	HMDB0000210	6006	0.440212	No	No	No
950		pantothenate	pantothenate	0.3	0.186188	0.000111128	93693	M01508.metal.pos.txt	Cofactors and vitamins	Pantothenate and CoA Metabolism	Shin	7160	HMDB0000210	4278	0.302523	No	No	No
951		pantothenate	pantothenate	0.4	0.132397	0.00017366	115945	M01508.metal.pos.txt	Cofactors and vitamins	Pantothenate and CoA Metabolism	Shin	7160	HMDB0000210	3698	0.248862	No	No	No
952		pantothenate	pantothenate	0.5	0.0722559	0.000297337	135372	M01508.metal.pos.txt	Cofactors and vitamins	Pantothenate and CoA Metabolism	Shin	7160	HMDB0000210	2904	0.172951	No	No	No
953	MetaAnalysis_PC.ae.C30.0_HetISqLt75_HetDfGt0_HWEPValGt1EMinus6.tsv.fixed_TS_Oct2018.so_RAW.txt	phosphatidylcholine acyl-alkyl c30:0	PC ae C30:0	0.001	0.201025	0.000106338	938	MetaAnalysis_PC.ae.C30.0_HetISqLt75_HetDfGt0_HWEPValGt1EMinus6.tsv.fixed	Lipid	Glycerophospholipids	Draaisma	6603	#N/A	4428	0.315565	No	No	No
954		phosphatidylcholine acyl-alkyl c30:0	PC ae C30:0	0.05	0.0287873	0.000545953	24906	MetaAnalysis_PC.ae.C30.0_HetISqLt75_HetDfGt0_HWEPValGt1EMinus6.tsv.fixed	Lipid	Glycerophospholipids	Draaisma	6603	#N/A	2019	0.0991087	No	No	No
955		phosphatidylcholine acyl-alkyl c30:0	PC ae C30:0	0.1	0.0482068	0.000418493	43934	MetaAnalysis_PC.ae.C30.0_HetISqLt75_HetDfGt0_HWEPValGt1EMinus6.tsv.fixed	Lipid	Glycerophospholipids	Draaisma	6603	#N/A	2490	0.134573	No	No	No
956		phosphatidylcholine acyl-alkyl c30:0	PC ae C30:0	0.2	0.0447788	0.00043642	76821	MetaAnalysis_PC.ae.C30.0_HetISqLt75_HetDfGt0_HWEPValGt1EMinus6.tsv.fixed	Lipid	Glycerophospholipids	Draaisma	6603	#N/A	2419	0.128672	No	No	No
957		phosphatidylcholine acyl-alkyl c30:0	PC ae C30:0	0.3	0.0451191	0.000434575	105340	MetaAnalysis_PC.ae.C30.0_HetISqLt75_HetDfGt0_HWEPValGt1EMinus6.tsv.fixed	Lipid	Glycerophospholipids	Draaisma	6603	#N/A	2430	0.129063	No	No	No
958		phosphatidylcholine acyl-alkyl c30:0	PC ae C30:0	0.4	0.0298829	0.000536562	130684	MetaAnalysis_PC.ae.C30.0_HetISqLt75_HetDfGt0_HWEPValGt1EMinus6.tsv.fixed	Lipid	Glycerophospholipids	Draaisma	6603	#N/A	2044	0.101622	No	No	No
959		phosphatidylcholine acyl-alkyl c30:0	PC ae C30:0	0.5	0.0328559	0.000512819	153031	MetaAnalysis_PC.ae.C30.0_HetISqLt75_HetDfGt0_HWEPValGt1EMinus6.tsv.fixed	Lipid	Glycerophospholipids	Draaisma	6603	#N/A	2112	0.108135	No	No	No
960	MetaAnalysis_PC.ae.C36.3_HetISqLt75_HetDfGt0_HWEPValGt1EMinus6.tsv.fixed_TS_Oct2018.so_RAW.txt	phosphatidylcholine acyl-alkyl c36:3	PC ae C36:3	0.001	0.452306	1.92093e-06	934	MetaAnalysis_PC.ae.C36.3_HetISqLt75_HetDfGt0_HWEPValGt1EMinus6.tsv.fixed	Lipid	Glycerophospholipids	Draaisma	7476	#N/A	6597	0.476577	No	No	No
961		phosphatidylcholine acyl-alkyl c36:3	PC ae C36:3	0.05	0.379831	1.25187e-05	24961	MetaAnalysis_PC.ae.C36.3_HetISqLt75_HetDfGt0_HWEPValGt1EMinus6.tsv.fixed	Lipid	Glycerophospholipids	Draaisma	7476	#N/A	6003	0.439814	No	No	No
962		phosphatidylcholine acyl-alkyl c36:3	PC ae C36:3	0.1	0.126379	0.000174944	44017	MetaAnalysis_PC.ae.C36.3_HetISqLt75_HetDfGt0_HWEPValGt1EMinus6.tsv.fixed	Lipid	Glycerophospholipids	Draaisma	7476	#N/A	3624	0.242401	No	No	No
963		phosphatidylcholine acyl-alkyl c36:3	PC ae C36:3	0.2	0.0306187	0.00046853	76934	MetaAnalysis_PC.ae.C36.3_HetISqLt75_HetDfGt0_HWEPValGt1EMinus6.tsv.fixed	Lipid	Glycerophospholipids	Draaisma	7476	#N/A	2065	0.103066	No	No	No
964		phosphatidylcholine acyl-alkyl c36:3	PC ae C36:3	0.3	0.0199838	0.000564215	105497	MetaAnalysis_PC.ae.C36.3_HetISqLt75_HetDfGt0_HWEPValGt1EMinus6.tsv.fixed	Lipid	Glycerophospholipids	Draaisma	7476	#N/A	1767	0.0786119	No	No	No
965		phosphatidylcholine acyl-alkyl c36:3	PC ae C36:3	0.4	0.0372636	0.000425322	130932	MetaAnalysis_PC.ae.C36.3_HetISqLt75_HetDfGt0_HWEPValGt1EMinus6.tsv.fixed	Lipid	Glycerophospholipids	Draaisma	7476	#N/A	2236	0.115841	No	No	No
966		phosphatidylcholine acyl-alkyl c36:3	PC ae C36:3	0.5	0.0506004	0.000359288	153349	MetaAnalysis_PC.ae.C36.3_HetISqLt75_HetDfGt0_HWEPValGt1EMinus6.tsv.fixed	Lipid	Glycerophospholipids	Draaisma	7476	#N/A	2539	0.138528	No	No	No
967	MetaAnalysis_PC.aa.C40.6_HetISqLt75_HetDfGt0_HWEPValGt1EMinus6.tsv.fixed_TS_Oct2018.so_RAW.txt	phosphatidylcholine diacyl c40:6	PC aa C40:6	0.001	0.484137	2.11642e-07	935	MetaAnalysis_PC.aa.C40.6_HetISqLt75_HetDfGt0_HWEPValGt1EMinus6.tsv.fixed	Lipid	Glycerophospholipids	Draaisma	7474	#N/A	6841	0.491922	No	No	No
968		phosphatidylcholine diacyl c40:6	PC aa C40:6	0.05	0.00407355	0.000936255	24952	MetaAnalysis_PC.aa.C40.6_HetISqLt75_HetDfGt0_HWEPValGt1EMinus6.tsv.fixed	Lipid	Glycerophospholipids	Draaisma	7474	#N/A	1060	0.0267125	Yes	No	No
969		phosphatidylcholine diacyl c40:6	PC aa C40:6	0.1	0.00183441	0.00112873	44027	MetaAnalysis_PC.aa.C40.6_HetISqLt75_HetDfGt0_HWEPValGt1EMinus6.tsv.fixed	Lipid	Glycerophospholipids	Draaisma	7474	#N/A	814	0.0156646	Yes	No	No
970		phosphatidylcholine diacyl c40:6	PC aa C40:6	0.2	8.58058e-05	0.00188728	76933	MetaAnalysis_PC.aa.C40.6_HetISqLt75_HetDfGt0_HWEPValGt1EMinus6.tsv.fixed	Lipid	Glycerophospholipids	Draaisma	7474	#N/A	291	0.00204961	Yes	Yes	No
971		phosphatidylcholine diacyl c40:6	PC aa C40:6	0.3	1.83812e-05	0.00227619	105496	MetaAnalysis_PC.aa.C40.6_HetISqLt75_HetDfGt0_HWEPValGt1EMinus6.tsv.fixed	Lipid	Glycerophospholipids	Draaisma	7474	#N/A	152	0.000840577	Yes	Yes	No
972		phosphatidylcholine diacyl c40:6	PC aa C40:6	0.4	1.25851e-05	0.0023723	130926	MetaAnalysis_PC.aa.C40.6_HetISqLt75_HetDfGt0_HWEPValGt1EMinus6.tsv.fixed	Lipid	Glycerophospholipids	Draaisma	7474	#N/A	130	0.000672916	Yes	Yes	No
973		phosphatidylcholine diacyl c40:6	PC aa C40:6	0.5	9.09153e-06	0.00245493	153356	MetaAnalysis_PC.aa.C40.6_HetISqLt75_HetDfGt0_HWEPValGt1EMinus6.tsv.fixed	Lipid	Glycerophospholipids	Draaisma	7474	#N/A	110	0.000574502	Yes	Yes	No
974	M36673	X-14745	X-14745	0.001	0.321368	4.0661e-05	855	M36673.metal.pos.txt	Unknown	Unknown	Shin	5292	#N/A	5505	0.405781	No	No	No
975		X-14745	X-14745	0.05	0.253896	8.28789e-05	22461	M36673.metal.pos.txt	Unknown	Unknown	Shin	5292	#N/A	4902	0.360023	No	No	No
976		X-14745	X-14745	0.1	0.158208	0.000189647	39520	M36673.metal.pos.txt	Unknown	Unknown	Shin	5292	#N/A	3990	0.275614	No	No	No
977		X-14745	X-14745	0.2	0.169999	0.000172026	68501	M36673.metal.pos.txt	Unknown	Unknown	Shin	5292	#N/A	4114	0.287229	No	No	No
978		X-14745	X-14745	0.3	0.107934	0.000289382	93673	M36673.metal.pos.txt	Unknown	Unknown	Shin	5292	#N/A	3376	0.22223	No	No	No
979		X-14745	X-14745	0.4	0.0883796	0.000344737	115926	M36673.metal.pos.txt	Unknown	Unknown	Shin	5292	#N/A	3139	0.195708	No	No	No
980		X-14745	X-14745	0.5	0.0616522	0.000448659	135364	M36673.metal.pos.txt	Unknown	Unknown	Shin	5292	#N/A	2749	0.155891	No	No	No
981	M19414	X-06350	X-06350	0.001	0.11378	0.000300543	857	M19414.metal.pos.txt	Unknown	Unknown	Shin	4844	#N/A	3459	0.228645	No	No	No
982		X-06350	X-06350	0.05	0.103161	0.000329641	22456	M19414.metal.pos.txt	Unknown	Unknown	Shin	4844	#N/A	3321	0.215921	No	No	No
983		X-06350	X-06350	0.1	0.0968897	0.000348545	39526	M19414.metal.pos.txt	Unknown	Unknown	Shin	4844	#N/A	3232	0.208379	No	No	No
984		X-06350	X-06350	0.2	0.0552315	0.000525788	68527	M19414.metal.pos.txt	Unknown	Unknown	Shin	4844	#N/A	2631	0.145919	No	No	No
985		X-06350	X-06350	0.3	0.0157381	0.000954704	93711	M19414.metal.pos.txt	Unknown	Unknown	Shin	4844	#N/A	1616	0.0676954	No	No	No
986		X-06350	X-06350	0.4	0.0463638	0.000583309	115959	M19414.metal.pos.txt	Unknown	Unknown	Shin	4844	#N/A	2455	0.131273	No	No	No
987		X-06350	X-06350	0.5	0.0412179	0.000622476	135398	M19414.metal.pos.txt	Unknown	Unknown	Shin	4844	#N/A	2340	0.122438	No	No	No
988	MetaAnalysis_PC.ae.C40.4_HetISqLt75_HetDfGt0_HWEPValGt1EMinus6.tsv.fixed_TS_Oct2018.so_RAW.txt	phosphatidylcholine acyl-alkyl c40:4	PC ae C40:4	0.001	0.172154	0.000119619	937	MetaAnalysis_PC.ae.C40.4_HetISqLt75_HetDfGt0_HWEPValGt1EMinus6.tsv.fixed	Lipid	Glycerophospholipids	Draaisma	7476	#N/A	4133	0.289533	No	No	No
989		phosphatidylcholine acyl-alkyl c40:4	PC ae C40:4	0.05	0.204456	9.1216e-05	24955	MetaAnalysis_PC.ae.C40.4_HetISqLt75_HetDfGt0_HWEPValGt1EMinus6.tsv.fixed	Lipid	Glycerophospholipids	Draaisma	7476	#N/A	4458	0.318792	No	No	No
990		phosphatidylcholine acyl-alkyl c40:4	PC ae C40:4	0.1	0.0867662	0.000247717	44035	MetaAnalysis_PC.ae.C40.4_HetISqLt75_HetDfGt0_HWEPValGt1EMinus6.tsv.fixed	Lipid	Glycerophospholipids	Draaisma	7476	#N/A	3118	0.193429	No	No	No
991		phosphatidylcholine acyl-alkyl c40:4	PC ae C40:4	0.2	0.0447788	0.000385467	76917	MetaAnalysis_PC.ae.C40.4_HetISqLt75_HetDfGt0_HWEPValGt1EMinus6.tsv.fixed	Lipid	Glycerophospholipids	Draaisma	7476	#N/A	2420	0.128619	No	No	No
992		phosphatidylcholine acyl-alkyl c40:4	PC ae C40:4	0.3	0.0372888	0.000425174	105492	MetaAnalysis_PC.ae.C40.4_HetISqLt75_HetDfGt0_HWEPValGt1EMinus6.tsv.fixed	Lipid	Glycerophospholipids	Draaisma	7476	#N/A	2238	0.115815	No	No	No
993		phosphatidylcholine acyl-alkyl c40:4	PC ae C40:4	0.4	0.00896762	0.000749112	130927	MetaAnalysis_PC.ae.C40.4_HetISqLt75_HetDfGt0_HWEPValGt1EMinus6.tsv.fixed	Lipid	Glycerophospholipids	Draaisma	7476	#N/A	1370	0.0454992	Yes	No	No
994		phosphatidylcholine acyl-alkyl c40:4	PC ae C40:4	0.5	0.0122052	0.000677303	153315	MetaAnalysis_PC.ae.C40.4_HetISqLt75_HetDfGt0_HWEPValGt1EMinus6.tsv.fixed	Lipid	Glycerophospholipids	Draaisma	7476	#N/A	1511	0.0561472	No	No	No
995	normres_TAG58_6_imputed_complete_CHARGE.csv_TS_Oct2018.so_RAW.txt	TAG 58:6	TAG 58:6	0.001	0.0968912	0.00109948	942	normres_TAG58_6_imputed_complete_CHARGE.csv	Lipid	Triacylglycerol	Rhee	1535	#N/A	3233	0.208318	No	No	No
996		TAG 58:6	TAG 58:6	0.05	0.0661091	0.00147531	25643	normres_TAG58_6_imputed_complete_CHARGE.csv	Lipid	Triacylglycerol	Rhee	1535	#N/A	2819	0.16301	No	No	No
997		TAG 58:6	TAG 58:6	0.1	0.252018	0.000290791	45471	normres_TAG58_6_imputed_complete_CHARGE.csv	Lipid	Triacylglycerol	Rhee	1535	#N/A	4889	0.35831	No	No	No
998		TAG 58:6	TAG 58:6	0.2	0.127984	0.00084032	79789	normres_TAG58_6_imputed_complete_CHARGE.csv	Lipid	Triacylglycerol	Rhee	1535	#N/A	3650	0.243731	No	No	No
999		TAG 58:6	TAG 58:6	0.3	0.0732618	0.0013724	109793	normres_TAG58_6_imputed_complete_CHARGE.csv	Lipid	Triacylglycerol	Rhee	1535	#N/A	2915	0.174697	No	No	No
1000		TAG 58:6	TAG 58:6	0.4	0.0670308	0.00146136	136594	normres_TAG58_6_imputed_complete_CHARGE.csv	Lipid	Triacylglycerol	Rhee	1535	#N/A	2829	0.164698	No	No	No
1001		TAG 58:6	TAG 58:6	0.5	0.0429901	0.00191872	160353	normres_TAG58_6_imputed_complete_CHARGE.csv	Lipid	Triacylglycerol	Rhee	1535	#N/A	2385	0.125293	No	No	No
1002	MetaAnalysis_PC.aa.C30.0_HetISqLt75_HetDfGt0_HWEPValGt1EMinus6.tsv.fixed_TS_Oct2018.so_RAW.txt	phosphatidylcholine diacyl c30:0	PC aa C30:0	0.001	0.450503	2.06997e-06	936	MetaAnalysis_PC.aa.C30.0_HetISqLt75_HetDfGt0_HWEPValGt1EMinus6.tsv.fixed	Lipid	Glycerophospholipids	Draaisma	7475	#N/A	6577	0.476121	No	No	No
1003		phosphatidylcholine diacyl c30:0	PC aa C30:0	0.05	0.0164163	0.00060911	24961	MetaAnalysis_PC.aa.C30.0_HetISqLt75_HetDfGt0_HWEPValGt1EMinus6.tsv.fixed	Lipid	Glycerophospholipids	Draaisma	7475	#N/A	1645	0.0693677	No	No	No
1004		phosphatidylcholine diacyl c30:0	PC aa C30:0	0.1	0.0998023	0.000220078	44025	MetaAnalysis_PC.aa.C30.0_HetISqLt75_HetDfGt0_HWEPValGt1EMinus6.tsv.fixed	Lipid	Glycerophospholipids	Draaisma	7475	#N/A	3276	0.21176	No	No	No
1005		phosphatidylcholine diacyl c30:0	PC aa C30:0	0.2	0.349045	2.01291e-05	76968	MetaAnalysis_PC.aa.C30.0_HetISqLt75_HetDfGt0_HWEPValGt1EMinus6.tsv.fixed	Lipid	Glycerophospholipids	Draaisma	7475	#N/A	5757	0.421437	No	No	No
1006		phosphatidylcholine diacyl c30:0	PC aa C30:0	0.3	0.33271	2.50173e-05	105574	MetaAnalysis_PC.aa.C30.0_HetISqLt75_HetDfGt0_HWEPValGt1EMinus6.tsv.fixed	Lipid	Glycerophospholipids	Draaisma	7475	#N/A	5614	0.411946	No	No	No
1007		phosphatidylcholine diacyl c30:0	PC aa C30:0	0.4	0.296938	3.80368e-05	131007	MetaAnalysis_PC.aa.C30.0_HetISqLt75_HetDfGt0_HWEPValGt1EMinus6.tsv.fixed	Lipid	Glycerophospholipids	Draaisma	7475	#N/A	5296	0.389732	No	No	No
1008		phosphatidylcholine diacyl c30:0	PC aa C30:0	0.5	0.319506	2.94359e-05	153408	MetaAnalysis_PC.aa.C30.0_HetISqLt75_HetDfGt0_HWEPValGt1EMinus6.tsv.fixed	Lipid	Glycerophospholipids	Draaisma	7475	#N/A	5491	0.404459	No	No	No
1009	MetaAnalysis_PC.ae.C38.2_HetISqLt75_HetDfGt0_HWEPValGt1EMinus6.tsv.fixed_TS_Oct2018.so_RAW.txt	phosphatidylcholine acyl-alkyl c38:2	PC ae C38:2	0.001	0.319587	2.94034e-05	938	MetaAnalysis_PC.ae.C38.2_HetISqLt75_HetDfGt0_HWEPValGt1EMinus6.tsv.fixed	Lipid	Glycerophospholipids	Draaisma	7476	#N/A	5492	0.404489	No	No	No
1010		phosphatidylcholine acyl-alkyl c38:2	PC ae C38:2	0.05	0.174153	0.000117652	24954	MetaAnalysis_PC.ae.C38.2_HetISqLt75_HetDfGt0_HWEPValGt1EMinus6.tsv.fixed	Lipid	Glycerophospholipids	Draaisma	7476	#N/A	4154	0.291416	No	No	No
1011		phosphatidylcholine acyl-alkyl c38:2	PC ae C38:2	0.1	0.0975187	0.00022458	44009	MetaAnalysis_PC.ae.C38.2_HetISqLt75_HetDfGt0_HWEPValGt1EMinus6.tsv.fixed	Lipid	Glycerophospholipids	Draaisma	7476	#N/A	3244	0.208956	No	No	No
1012		phosphatidylcholine acyl-alkyl c38:2	PC ae C38:2	0.2	0.0369736	0.000427029	76925	MetaAnalysis_PC.ae.C38.2_HetISqLt75_HetDfGt0_HWEPValGt1EMinus6.tsv.fixed	Lipid	Glycerophospholipids	Draaisma	7476	#N/A	2229	0.1153	No	No	No
1013		phosphatidylcholine acyl-alkyl c38:2	PC ae C38:2	0.3	0.053456	0.000347623	105518	MetaAnalysis_PC.ae.C38.2_HetISqLt75_HetDfGt0_HWEPValGt1EMinus6.tsv.fixed	Lipid	Glycerophospholipids	Draaisma	7476	#N/A	2597	0.143078	No	No	No
1014		phosphatidylcholine acyl-alkyl c38:2	PC ae C38:2	0.4	0.0501891	0.000361027	130984	MetaAnalysis_PC.ae.C38.2_HetISqLt75_HetDfGt0_HWEPValGt1EMinus6.tsv.fixed	Lipid	Glycerophospholipids	Draaisma	7476	#N/A	2533	0.137728	No	No	No
1015		phosphatidylcholine acyl-alkyl c38:2	PC ae C38:2	0.5	0.0681619	0.000296769	153399	MetaAnalysis_PC.ae.C38.2_HetISqLt75_HetDfGt0_HWEPValGt1EMinus6.tsv.fixed	Lipid	Glycerophospholipids	Draaisma	7476	#N/A	2848	0.16636	No	No	No
1016	normres_TAG60_12_PC1_imputed_complete_CHARGE.csv_TS_Oct2018.so_RAW.txt	TAG 60:12	TAG 60:12	0.001	0.41278	2.70613e-05	942	normres_TAG60_12_PC1_imputed_complete_CHARGE.csv	Lipid	Triacylglycerol	Rhee	1795	#N/A	6276	0.457176	No	No	No
1017		TAG 60:12	TAG 60:12	0.05	0.196511	0.000406365	25643	normres_TAG60_12_PC1_imputed_complete_CHARGE.csv	Lipid	Triacylglycerol	Rhee	1795	#N/A	4378	0.312002	No	No	No
1018		TAG 60:12	TAG 60:12	0.1	0.26503	0.000219628	45471	normres_TAG60_12_PC1_imputed_complete_CHARGE.csv	Lipid	Triacylglycerol	Rhee	1795	#N/A	5005	0.368077	No	No	No
1019		TAG 60:12	TAG 60:12	0.2	0.024803	0.00214518	79790	normres_TAG60_12_PC1_imputed_complete_CHARGE.csv	Lipid	Triacylglycerol	Rhee	1795	#N/A	1926	0.0895148	No	No	No
1020		TAG 60:12	TAG 60:12	0.3	0.00729598	0.00331765	109794	normres_TAG60_12_PC1_imputed_complete_CHARGE.csv	Lipid	Triacylglycerol	Rhee	1795	#N/A	1272	0.0398698	Yes	No	No
1021		TAG 60:12	TAG 60:12	0.4	0.0550249	0.00142155	136596	normres_TAG60_12_PC1_imputed_complete_CHARGE.csv	Lipid	Triacylglycerol	Rhee	1795	#N/A	2626	0.14565	No	No	No
1022		TAG 60:12	TAG 60:12	0.5	0.0681115	0.00123607	160355	normres_TAG60_12_PC1_imputed_complete_CHARGE.csv	Lipid	Triacylglycerol	Rhee	1795	#N/A	2847	0.166295	No	No	No
1023	normres_CE16_1_PC1_imputed_complete_CHARGE.csv_TS_Oct2018.so_RAW.txt	CE 16:1	CE 16:1	0.001	0.143265	0.000632587	942	normres_CE16_1_PC1_imputed_complete_CHARGE.csv	Lipid	Cholesterol Ester	Rhee	1795	HMDB0000658	3824	0.260417	No	No	No
1024		CE 16:1	CE 16:1	0.05	0.01108	0.00291118	25643	normres_CE16_1_PC1_imputed_complete_CHARGE.csv	Lipid	Cholesterol Ester	Rhee	1795	HMDB0000658	1461	0.0527152	No	No	No
1025		CE 16:1	CE 16:1	0.1	0.00996634	0.00301371	45471	normres_CE16_1_PC1_imputed_complete_CHARGE.csv	Lipid	Cholesterol Ester	Rhee	1795	HMDB0000658	1411	0.0490971	Yes	No	No
1026		CE 16:1	CE 16:1	0.2	0.0116003	0.00286687	79790	normres_CE16_1_PC1_imputed_complete_CHARGE.csv	Lipid	Cholesterol Ester	Rhee	1795	HMDB0000658	1485	0.0542988	No	No	No
1027		CE 16:1	CE 16:1	0.3	0.0195665	0.00236771	109794	normres_CE16_1_PC1_imputed_complete_CHARGE.csv	Lipid	Cholesterol Ester	Rhee	1795	HMDB0000658	1747	0.0778516	No	No	No
1028		CE 16:1	CE 16:1	0.4	0.0144072	0.00265867	136596	normres_CE16_1_PC1_imputed_complete_CHARGE.csv	Lipid	Cholesterol Ester	Rhee	1795	HMDB0000658	1585	0.0631827	No	No	No
1029		CE 16:1	CE 16:1	0.5	0.0120535	0.00282992	160355	normres_CE16_1_PC1_imputed_complete_CHARGE.csv	Lipid	Cholesterol Ester	Rhee	1795	HMDB0000658	1504	0.0557074	No	No	No
1030	Summary_statistics_MAGNETIC_Alb.txt_TS_Oct2018.so_RAW.txt	albumin	Alb	0.001	0.24159	2.59319e-05	2242	Summary_statistics_MAGNETIC_Alb.txt	Lipid associated	#N/A	Kettunen	18960	#N/A	4785	0.35095	No	No	No
1031		albumin	Alb	0.05	0.0683604	0.000116791	68529	Summary_statistics_MAGNETIC_Alb.txt	Lipid associated	#N/A	Kettunen	18960	#N/A	2850	0.166727	No	No	No
1032		albumin	Alb	0.1	0.255132	2.28649e-05	124108	Summary_statistics_MAGNETIC_Alb.txt	Lipid associated	#N/A	Kettunen	18960	#N/A	4912	0.361039	No	No	No
1033		albumin	Alb	0.2	0.392348	3.93671e-06	223058	Summary_statistics_MAGNETIC_Alb.txt	Lipid associated	#N/A	Kettunen	18960	#N/A	6099	0.447157	No	No	No
1034		albumin	Alb	0.3	0.449337	8.55189e-07	310393	Summary_statistics_MAGNETIC_Alb.txt	Lipid associated	#N/A	Kettunen	18960	#N/A	6565	0.475757	No	No	No
1035		albumin	Alb	0.4	0.387489	4.31017e-06	389396	Summary_statistics_MAGNETIC_Alb.txt	Lipid associated	#N/A	Kettunen	18960	#N/A	6059	0.444535	No	No	No
1036		albumin	Alb	0.5	0.477284	1.71196e-07	460090	Summary_statistics_MAGNETIC_Alb.txt	Lipid associated	#N/A	Kettunen	18960	#N/A	6788	0.488745	No	No	No
1037	MetaAnalysis_PC.ae.C38.0_HetISqLt75_HetDfGt0_HWEPValGt1EMinus6.tsv.fixed_TS_Oct2018.so_RAW.txt	phosphatidylcholine acyl-alkyl c38:0	PC ae C38:0	0.001	0.281317	4.4843e-05	934	MetaAnalysis_PC.ae.C38.0_HetISqLt75_HetDfGt0_HWEPValGt1EMinus6.tsv.fixed	Lipid	Glycerophospholipids	Draaisma	7474	#N/A	5162	0.378813	No	No	No
1038		phosphatidylcholine acyl-alkyl c38:0	PC ae C38:0	0.05	0.430944	4.04955e-06	24940	MetaAnalysis_PC.ae.C38.0_HetISqLt75_HetDfGt0_HWEPValGt1EMinus6.tsv.fixed	Lipid	Glycerophospholipids	Draaisma	7474	#N/A	6429	0.465934	No	No	No
1039		phosphatidylcholine acyl-alkyl c38:0	PC ae C38:0	0.1	0.371	1.45005e-05	44014	MetaAnalysis_PC.ae.C38.0_HetISqLt75_HetDfGt0_HWEPValGt1EMinus6.tsv.fixed	Lipid	Glycerophospholipids	Draaisma	7474	#N/A	5936	0.434437	No	No	No
1040		phosphatidylcholine acyl-alkyl c38:0	PC ae C38:0	0.2	0.136137	0.000161247	76917	MetaAnalysis_PC.ae.C38.0_HetISqLt75_HetDfGt0_HWEPValGt1EMinus6.tsv.fixed	Lipid	Glycerophospholipids	Draaisma	7474	#N/A	3748	0.252478	No	No	No
1041		phosphatidylcholine acyl-alkyl c38:0	PC ae C38:0	0.3	0.0982763	0.000223123	105491	MetaAnalysis_PC.ae.C38.0_HetISqLt75_HetDfGt0_HWEPValGt1EMinus6.tsv.fixed	Lipid	Glycerophospholipids	Draaisma	7474	#N/A	3255	0.209867	No	No	No
1042		phosphatidylcholine acyl-alkyl c38:0	PC ae C38:0	0.4	0.045707	0.000381155	130912	MetaAnalysis_PC.ae.C38.0_HetISqLt75_HetDfGt0_HWEPValGt1EMinus6.tsv.fixed	Lipid	Glycerophospholipids	Draaisma	7474	#N/A	2443	0.130049	No	No	No
1043		phosphatidylcholine acyl-alkyl c38:0	PC ae C38:0	0.5	0.0249292	0.00051448	153315	MetaAnalysis_PC.ae.C38.0_HetISqLt75_HetDfGt0_HWEPValGt1EMinus6.tsv.fixed	Lipid	Glycerophospholipids	Draaisma	7474	#N/A	1931	0.0897374	No	No	No
1044	Summary_statistics_MAGNETIC_Val.txt_TS_Oct2018.so_RAW.txt	valine	Val	0.001	0.195813	2.9473e-05	2250	Summary_statistics_MAGNETIC_Val.txt	Amino acid	Leucine, Isoleucine and Valine Metabolism	Kettunen	24900	HMDB0000883	4371	0.311392	No	No	No
1045		valine	Val	0.05	0.0138792	0.000194479	68888	Summary_statistics_MAGNETIC_Val.txt	Amino acid	Leucine, Isoleucine and Valine Metabolism	Kettunen	24900	HMDB0000883	1565	0.0616451	No	No	No
1046		valine	Val	0.1	0.00636054	0.000249266	124823	Summary_statistics_MAGNETIC_Val.txt	Amino acid	Leucine, Isoleucine and Valine Metabolism	Kettunen	24900	HMDB0000883	1211	0.0365088	Yes	No	No
1047		valine	Val	0.2	0.106597	6.22309e-05	224415	Summary_statistics_MAGNETIC_Val.txt	Amino acid	Leucine, Isoleucine and Valine Metabolism	Kettunen	24900	HMDB0000883	3359	0.220589	No	No	No
1048		valine	Val	0.3	0.309344	9.94834e-06	312366	Summary_statistics_MAGNETIC_Val.txt	Amino acid	Leucine, Isoleucine and Valine Metabolism	Kettunen	24900	HMDB0000883	5399	0.398269	No	No	No
1049		valine	Val	0.4	0.399874	2.58433e-06	391894	Summary_statistics_MAGNETIC_Val.txt	Amino acid	Leucine, Isoleucine and Valine Metabolism	Kettunen	24900	HMDB0000883	6167	0.450709	No	No	No
1050		valine	Val	0.5	0.499735	1.77691e-11	463026	Summary_statistics_MAGNETIC_Val.txt	Amino acid	Leucine, Isoleucine and Valine Metabolism	Kettunen	24900	HMDB0000883	6950	0.499807	No	No	No
1051	MetaAnalysis_PC.ae.C36.1_HetISqLt75_HetDfGt0_HWEPValGt1EMinus6.tsv.fixed_TS_Oct2018.so_RAW.txt	phosphatidylcholine acyl-alkyl c36:1	PC ae C36:1	0.001	0.488089	1.19279e-07	937	MetaAnalysis_PC.ae.C36.1_HetISqLt75_HetDfGt0_HWEPValGt1EMinus6.tsv.fixed	Lipid	Glycerophospholipids	Draaisma	7475	#N/A	6869	0.493916	No	No	No
1052		phosphatidylcholine acyl-alkyl c36:1	PC ae C36:1	0.05	0.390942	1.02546e-05	24940	MetaAnalysis_PC.ae.C36.1_HetISqLt75_HetDfGt0_HWEPValGt1EMinus6.tsv.fixed	Lipid	Glycerophospholipids	Draaisma	7475	#N/A	6087	0.446433	No	No	No
1053		phosphatidylcholine acyl-alkyl c36:1	PC ae C36:1	0.1	0.385875	1.12575e-05	44003	MetaAnalysis_PC.ae.C36.1_HetISqLt75_HetDfGt0_HWEPValGt1EMinus6.tsv.fixed	Lipid	Glycerophospholipids	Draaisma	7475	#N/A	6047	0.443562	No	No	No
1054		phosphatidylcholine acyl-alkyl c36:1	PC ae C36:1	0.2	0.441518	2.89559e-06	76931	MetaAnalysis_PC.ae.C36.1_HetISqLt75_HetDfGt0_HWEPValGt1EMinus6.tsv.fixed	Lipid	Glycerophospholipids	Draaisma	7475	#N/A	6508	0.471573	No	No	No
1055		phosphatidylcholine acyl-alkyl c36:1	PC ae C36:1	0.3	0.411981	6.62004e-06	105525	MetaAnalysis_PC.ae.C36.1_HetISqLt75_HetDfGt0_HWEPValGt1EMinus6.tsv.fixed	Lipid	Glycerophospholipids	Draaisma	7475	#N/A	6267	0.456946	No	No	No
1056		phosphatidylcholine acyl-alkyl c36:1	PC ae C36:1	0.4	0.490436	7.68959e-08	130952	MetaAnalysis_PC.ae.C36.1_HetISqLt75_HetDfGt0_HWEPValGt1EMinus6.tsv.fixed	Lipid	Glycerophospholipids	Draaisma	7475	#N/A	6885	0.495138	No	No	No
1057		phosphatidylcholine acyl-alkyl c36:1	PC ae C36:1	0.5	0.491285	6.38559e-08	153373	MetaAnalysis_PC.ae.C36.1_HetISqLt75_HetDfGt0_HWEPValGt1EMinus6.tsv.fixed	Lipid	Glycerophospholipids	Draaisma	7475	#N/A	6891	0.495562	No	No	No
1058	Summary_statistics_MAGNETIC_S.VLDL.TG.txt_TS_Oct2018.so_RAW.txt	triglycerides,in,small,vldl	S.VLDL.TG	0.001	0.122945	6.24576e-05	2243	Summary_statistics_MAGNETIC_S.VLDL.TG.txt	Lipid	Lipid ratios	Kettunen	21558	#N/A	3575	0.239047	No	No	No
1059		triglycerides,in,small,vldl	S.VLDL.TG	0.05	0.0757939	9.53753e-05	68667	Summary_statistics_MAGNETIC_S.VLDL.TG.txt	Lipid	Lipid ratios	Kettunen	21558	#N/A	2958	0.178108	No	No	No
1060		triglycerides,in,small,vldl	S.VLDL.TG	0.1	0.0637155	0.000107774	124376	Summary_statistics_MAGNETIC_S.VLDL.TG.txt	Lipid	Lipid ratios	Kettunen	21558	#N/A	2784	0.159083	No	No	No
1061		triglycerides,in,small,vldl	S.VLDL.TG	0.2	0.044045	0.000134926	223564	Summary_statistics_MAGNETIC_S.VLDL.TG.txt	Lipid	Lipid ratios	Kettunen	21558	#N/A	2405	0.1273	No	No	No
1062		triglycerides,in,small,vldl	S.VLDL.TG	0.3	0.045482	0.000132528	311165	Summary_statistics_MAGNETIC_S.VLDL.TG.txt	Lipid	Lipid ratios	Kettunen	21558	#N/A	2438	0.129674	No	No	No
1063		triglycerides,in,small,vldl	S.VLDL.TG	0.4	0.0366821	0.000148709	390375	Summary_statistics_MAGNETIC_S.VLDL.TG.txt	Lipid	Lipid ratios	Kettunen	21558	#N/A	2224	0.114648	No	No	No
1064		triglycerides,in,small,vldl	S.VLDL.TG	0.5	0.0252381	0.000177439	461237	Summary_statistics_MAGNETIC_S.VLDL.TG.txt	Lipid	Lipid ratios	Kettunen	21558	#N/A	1941	0.0903813	No	No	No
1065	M34350	X-12740	X-12740	0.001	0.373494	2.98133e-05	854	M34350.metal.pos.txt	Unknown	Unknown	Shin	3491	#N/A	5967	0.435086	No	No	No
1066		X-12740	X-12740	0.05	0.00454145	0.00194781	22452	M34350.metal.pos.txt	Unknown	Unknown	Shin	3491	#N/A	1092	0.0289081	Yes	No	No
1067		X-12740	X-12740	0.1	0.00189068	0.00239927	39505	M34350.metal.pos.txt	Unknown	Unknown	Shin	3491	#N/A	823	0.0159686	Yes	No	No
1068		X-12740	X-12740	0.2	0.000623651	0.00298006	68483	M34350.metal.pos.txt	Unknown	Unknown	Shin	3491	#N/A	568	0.00763204	Yes	Yes	No
1069		X-12740	X-12740	0.3	0.00299441	0.00216141	93647	M34350.metal.pos.txt	Unknown	Unknown	Shin	3491	#N/A	959	0.021704	Yes	No	No
1070		X-12740	X-12740	0.4	0.00283481	0.00218964	115873	M34350.metal.pos.txt	Unknown	Unknown	Shin	3491	#N/A	941	0.0209402	Yes	No	No
1071		X-12740	X-12740	0.5	0.00201517	0.00236617	135280	M34350.metal.pos.txt	Unknown	Unknown	Shin	3491	#N/A	843	0.0166162	Yes	No	No
1072	normres_lactose_imputed_complete_CHARGE.csv_TS_Oct2018.so_RAW.txt	lactose	lactose	0.001	0.286539	0.000218229	942	normres_lactose_imputed_complete_CHARGE.csv	Carbohydrate	Fructose, Mannose and Galactose Metabolism	Rhee	1455	HMDB0000186	5208	0.382438	No	No	No
1073		lactose	lactose	0.05	0.0326944	0.00233071	25642	normres_lactose_imputed_complete_CHARGE.csv	Carbohydrate	Fructose, Mannose and Galactose Metabolism	Rhee	1455	HMDB0000186	2107	0.107859	No	No	No
1074		lactose	lactose	0.1	0.328412	0.000135665	45470	normres_lactose_imputed_complete_CHARGE.csv	Carbohydrate	Fructose, Mannose and Galactose Metabolism	Rhee	1455	HMDB0000186	5564	0.410278	No	No	No
1075		lactose	lactose	0.2	0.257253	0.000291979	79787	normres_lactose_imputed_complete_CHARGE.csv	Carbohydrate	Fructose, Mannose and Galactose Metabolism	Rhee	1455	HMDB0000186	4930	0.362711	No	No	No
1076		lactose	lactose	0.3	0.152675	0.000721861	109791	normres_lactose_imputed_complete_CHARGE.csv	Carbohydrate	Fructose, Mannose and Galactose Metabolism	Rhee	1455	HMDB0000186	3927	0.270242	No	No	No
1077		lactose	lactose	0.4	0.0893616	0.00124198	136592	normres_lactose_imputed_complete_CHARGE.csv	Carbohydrate	Fructose, Mannose and Galactose Metabolism	Rhee	1455	HMDB0000186	3154	0.196941	No	No	No
1078		lactose	lactose	0.5	0.0928255	0.00120326	160350	normres_lactose_imputed_complete_CHARGE.csv	Carbohydrate	Fructose, Mannose and Galactose Metabolism	Rhee	1455	HMDB0000186	3187	0.202457	No	No	No
1079	normres_niacinamide_imputed_complete_CHARGE.csv_TS_Oct2018.so_RAW.txt	niacinamide	niacinamide	0.001	0.497907	1.52697e-08	942	normres_niacinamide_imputed_complete_CHARGE.csv	Cofactors and Vitamins	Nicotinate and nicotinamide metabolism	Rhee	1802	HMDB0001406	6934	0.499128	No	No	No
1080		niacinamide	niacinamide	0.05	0.421263	2.19018e-05	25643	normres_niacinamide_imputed_complete_CHARGE.csv	Cofactors and Vitamins	Nicotinate and nicotinamide metabolism	Rhee	1802	HMDB0001406	6347	0.461351	No	No	No
1081		niacinamide	niacinamide	0.1	0.416935	2.44119e-05	45471	normres_niacinamide_imputed_complete_CHARGE.csv	Cofactors and Vitamins	Nicotinate and nicotinamide metabolism	Rhee	1802	HMDB0001406	6307	0.459508	No	No	No
1082		niacinamide	niacinamide	0.2	0.245164	0.000264009	79790	normres_niacinamide_imputed_complete_CHARGE.csv	Cofactors and Vitamins	Nicotinate and nicotinamide metabolism	Rhee	1802	HMDB0001406	4822	0.353408	No	No	No
1083		niacinamide	niacinamide	0.3	0.281171	0.000186257	109794	normres_niacinamide_imputed_complete_CHARGE.csv	Cofactors and Vitamins	Nicotinate and nicotinamide metabolism	Rhee	1802	HMDB0001406	5159	0.378837	No	No	No
1084		niacinamide	niacinamide	0.4	0.192973	0.000417048	136596	normres_niacinamide_imputed_complete_CHARGE.csv	Cofactors and Vitamins	Nicotinate and nicotinamide metabolism	Rhee	1802	HMDB0001406	4341	0.308996	No	No	No
1085		niacinamide	niacinamide	0.5	0.164552	0.000528394	160355	normres_niacinamide_imputed_complete_CHARGE.csv	Cofactors and Vitamins	Nicotinate and nicotinamide metabolism	Rhee	1802	HMDB0001406	4061	0.281655	No	No	No
1086	MetaAnalysis_PC.ae.C38.5_HetISqLt75_HetDfGt0_HWEPValGt1EMinus6.tsv.fixed_TS_Oct2018.so_RAW.txt	phosphatidylcholine acyl-alkyl c38:5	PC ae C38:5	0.001	0.396595	9.19377e-06	935	MetaAnalysis_PC.ae.C38.5_HetISqLt75_HetDfGt0_HWEPValGt1EMinus6.tsv.fixed	Lipid	Glycerophospholipids	Draaisma	7476	#N/A	6141	0.448906	No	No	No
1087		phosphatidylcholine acyl-alkyl c38:5	PC ae C38:5	0.05	0.0366395	0.000429014	24951	MetaAnalysis_PC.ae.C38.5_HetISqLt75_HetDfGt0_HWEPValGt1EMinus6.tsv.fixed	Lipid	Glycerophospholipids	Draaisma	7476	#N/A	2223	0.114567	No	No	No
1088		phosphatidylcholine acyl-alkyl c38:5	PC ae C38:5	0.1	0.0155342	0.000621687	44008	MetaAnalysis_PC.ae.C38.5_HetISqLt75_HetDfGt0_HWEPValGt1EMinus6.tsv.fixed	Lipid	Glycerophospholipids	Draaisma	7476	#N/A	1611	0.0670257	No	No	No
1089		phosphatidylcholine acyl-alkyl c38:5	PC ae C38:5	0.2	0.000288048	0.00158404	76916	MetaAnalysis_PC.ae.C38.5_HetISqLt75_HetDfGt0_HWEPValGt1EMinus6.tsv.fixed	Lipid	Glycerophospholipids	Draaisma	7476	#N/A	445	0.00449937	Yes	Yes	No
1090		phosphatidylcholine acyl-alkyl c38:5	PC ae C38:5	0.3	0.000156765	0.00173576	105524	MetaAnalysis_PC.ae.C38.5_HetISqLt75_HetDfGt0_HWEPValGt1EMinus6.tsv.fixed	Lipid	Glycerophospholipids	Draaisma	7476	#N/A	368	0.00296107	Yes	Yes	No
1091		phosphatidylcholine acyl-alkyl c38:5	PC ae C38:5	0.4	6.01043e-05	0.0019763	130955	MetaAnalysis_PC.ae.C38.5_HetISqLt75_HetDfGt0_HWEPValGt1EMinus6.tsv.fixed	Lipid	Glycerophospholipids	Draaisma	7476	#N/A	246	0.00169831	Yes	Yes	No
1092		phosphatidylcholine acyl-alkyl c38:5	PC ae C38:5	0.5	7.16684e-05	0.00193202	153353	MetaAnalysis_PC.ae.C38.5_HetISqLt75_HetDfGt0_HWEPValGt1EMinus6.tsv.fixed	Lipid	Glycerophospholipids	Draaisma	7476	#N/A	268	0.00185883	Yes	Yes	No
1093	M37104	cyclo(leu-pro)	cyclo(leu-pro)	0.001	0.469988	1.25445e-06	854	M37104.metal.pos.txt	Peptide	Dipeptide	Shin	4520	HMDB0034276	6736	0.484989	No	No	No
1094		cyclo(leu-pro)	cyclo(leu-pro)	0.05	0.279414	7.56028e-05	22450	M37104.metal.pos.txt	Peptide	Dipeptide	Shin	4520	HMDB0034276	5141	0.377788	No	No	No
1095		cyclo(leu-pro)	cyclo(leu-pro)	0.1	0.229179	0.000121653	39508	M37104.metal.pos.txt	Peptide	Dipeptide	Shin	4520	HMDB0034276	4689	0.339736	No	No	No
1096		cyclo(leu-pro)	cyclo(leu-pro)	0.2	0.165809	0.000208511	68477	M37104.metal.pos.txt	Peptide	Dipeptide	Shin	4520	HMDB0034276	4078	0.282623	No	No	No
1097		cyclo(leu-pro)	cyclo(leu-pro)	0.3	0.276339	7.79932e-05	93636	M37104.metal.pos.txt	Peptide	Dipeptide	Shin	4520	HMDB0034276	5105	0.376264	No	No	No
1098		cyclo(leu-pro)	cyclo(leu-pro)	0.4	0.252289	9.85117e-05	115870	M37104.metal.pos.txt	Peptide	Dipeptide	Shin	4520	HMDB0034276	4891	0.358548	No	No	No
1099		cyclo(leu-pro)	cyclo(leu-pro)	0.5	0.204269	0.000151106	135289	M37104.metal.pos.txt	Peptide	Dipeptide	Shin	4520	HMDB0034276	4454	0.318787	No	No	No
1100	M33833	X-12405	X-12405	0.001	0.0256361	0.000600319	857	M33833.metal.pos.txt	Unknown	Unknown	Shin	6327	#N/A	1948	0.0914766	No	No	No
1101		X-12405	X-12405	0.05	0.479236	4.28528e-07	22458	M33833.metal.pos.txt	Unknown	Unknown	Shin	6327	#N/A	6804	0.48959	No	No	No
1102		X-12405	X-12405	0.1	0.391027	1.20959e-05	39523	M33833.metal.pos.txt	Unknown	Unknown	Shin	6327	#N/A	6089	0.446384	No	No	No
1103		X-12405	X-12405	0.2	0.343832	2.5545e-05	68510	M33833.metal.pos.txt	Unknown	Unknown	Shin	6327	#N/A	5716	0.418121	No	No	No
1104		X-12405	X-12405	0.3	0.45716	1.8296e-06	93685	M33833.metal.pos.txt	Unknown	Unknown	Shin	6327	#N/A	6637	0.478788	No	No	No
1105		X-12405	X-12405	0.4	0.435187	4.20872e-06	115937	M33833.metal.pos.txt	Unknown	Unknown	Shin	6327	#N/A	6461	0.468192	No	No	No
1106		X-12405	X-12405	0.5	0.479861	4.03107e-07	135365	M33833.metal.pos.txt	Unknown	Unknown	Shin	6327	#N/A	6811	0.489725	No	No	No
1107	Summary_statistics_MAGNETIC_L.VLDL.PL.txt_TS_Oct2018.so_RAW.txt	phospholipids,in,large,vldl	L.VLDL.PL	0.001	0.382461	4.20992e-06	2243	Summary_statistics_MAGNETIC_L.VLDL.PL.txt	Lipid	Lipid ratios	Kettunen	21239	#N/A	6023	0.441389	No	No	No
1108		phospholipids,in,large,vldl	L.VLDL.PL	0.05	0.354096	6.59584e-06	68561	Summary_statistics_MAGNETIC_L.VLDL.PL.txt	Lipid	Lipid ratios	Kettunen	21239	#N/A	5802	0.42422	No	No	No
1109		phospholipids,in,large,vldl	L.VLDL.PL	0.1	0.31579	1.08255e-05	124169	Summary_statistics_MAGNETIC_L.VLDL.PL.txt	Lipid	Lipid ratios	Kettunen	21239	#N/A	5452	0.402615	No	No	No
1110		phospholipids,in,large,vldl	L.VLDL.PL	0.2	0.327422	9.40945e-06	223162	Summary_statistics_MAGNETIC_L.VLDL.PL.txt	Lipid	Lipid ratios	Kettunen	21239	#N/A	5561	0.409262	No	No	No
1111		phospholipids,in,large,vldl	L.VLDL.PL	0.3	0.365667	5.55063e-06	310570	Summary_statistics_MAGNETIC_L.VLDL.PL.txt	Lipid	Lipid ratios	Kettunen	21239	#N/A	5890	0.431537	No	No	No
1112		phospholipids,in,large,vldl	L.VLDL.PL	0.4	0.315171	1.09042e-05	389607	Summary_statistics_MAGNETIC_L.VLDL.PL.txt	Lipid	Lipid ratios	Kettunen	21239	#N/A	5442	0.402565	No	No	No
1113		phospholipids,in,large,vldl	L.VLDL.PL	0.5	0.370387	5.15311e-06	460295	Summary_statistics_MAGNETIC_L.VLDL.PL.txt	Lipid	Lipid ratios	Kettunen	21239	#N/A	5929	0.434232	No	No	No
1114	normres_LPC22_6_PC1_imputed_complete_CHARGE.csv_TS_Oct2018.so_RAW.txt	LPC 22:6	LPC 22:6	0.001	0.272253	0.000204576	942	normres_LPC22_6_PC1_imputed_complete_CHARGE.csv	Lipid	Glycerophospholipids	Rhee	1795	#N/A	5066	0.373555	No	No	No
1115		LPC 22:6	LPC 22:6	0.05	0.364104	6.72753e-05	25643	normres_LPC22_6_PC1_imputed_complete_CHARGE.csv	Lipid	Glycerophospholipids	Rhee	1795	#N/A	5874	0.430863	No	No	No
1116		LPC 22:6	LPC 22:6	0.1	0.200747	0.000392038	45471	normres_LPC22_6_PC1_imputed_complete_CHARGE.csv	Lipid	Glycerophospholipids	Rhee	1795	#N/A	4425	0.315343	No	No	No
1117		LPC 22:6	LPC 22:6	0.2	0.426118	1.93285e-05	79790	normres_LPC22_6_PC1_imputed_complete_CHARGE.csv	Lipid	Glycerophospholipids	Rhee	1795	#N/A	6398	0.462949	No	No	No
1118		LPC 22:6	LPC 22:6	0.3	0.438905	1.31686e-05	109794	normres_LPC22_6_PC1_imputed_complete_CHARGE.csv	Lipid	Glycerophospholipids	Rhee	1795	#N/A	6486	0.470371	No	No	No
1119		LPC 22:6	LPC 22:6	0.4	0.256667	0.000238003	136596	normres_LPC22_6_PC1_imputed_complete_CHARGE.csv	Lipid	Glycerophospholipids	Rhee	1795	#N/A	4921	0.362546	No	No	No
1120		LPC 22:6	LPC 22:6	0.5	0.306843	0.000141963	160355	normres_LPC22_6_PC1_imputed_complete_CHARGE.csv	Lipid	Glycerophospholipids	Rhee	1795	#N/A	5379	0.396517	No	No	No
1121	M33408	X-12056	X-12056	0.001	0.0335259	0.000861777	857	M33408.metal.pos.txt	Unknown	Unknown	Shin	3890	#N/A	2133	0.109254	No	No	No
1122		X-12056	X-12056	0.05	0.102546	0.0004127	22462	M33408.metal.pos.txt	Unknown	Unknown	Shin	3890	#N/A	3317	0.214893	No	No	No
1123		X-12056	X-12056	0.1	0.275446	9.14412e-05	39522	M33408.metal.pos.txt	Unknown	Unknown	Shin	3890	#N/A	5099	0.37549	No	No	No
1124		X-12056	X-12056	0.2	0.459086	2.71328e-06	68517	M33408.metal.pos.txt	Unknown	Unknown	Shin	3890	#N/A	6654	0.479577	No	No	No
1125		X-12056	X-12056	0.3	0.46257	2.26953e-06	93683	M33408.metal.pos.txt	Unknown	Unknown	Shin	3890	#N/A	6684	0.481048	No	No	No
1126		X-12056	X-12056	0.4	0.425163	9.15391e-06	115925	M33408.metal.pos.txt	Unknown	Unknown	Shin	3890	#N/A	6386	0.462779	No	No	No
1127		X-12056	X-12056	0.5	0.363061	3.15424e-05	135356	M33408.metal.pos.txt	Unknown	Unknown	Shin	3890	#N/A	5863	0.430435	No	No	No
1128	normres_TAG50_3_imputed_complete_CHARGE.csv_TS_Oct2018.so_RAW.txt	TAG 50:3	TAG 50:3	0.001	0.364475	6.68192e-05	942	normres_TAG50_3_imputed_complete_CHARGE.csv	Lipid	Triacylglycerol	Rhee	1797	#N/A	5877	0.431081	No	No	No
1129		TAG 50:3	TAG 50:3	0.05	0.00910714	0.00309782	25643	normres_TAG50_3_imputed_complete_CHARGE.csv	Lipid	Triacylglycerol	Rhee	1797	#N/A	1377	0.0459722	Yes	No	No
1130		TAG 50:3	TAG 50:3	0.1	0.0037892	0.00396014	45471	normres_TAG50_3_imputed_complete_CHARGE.csv	Lipid	Triacylglycerol	Rhee	1797	#N/A	1035	0.025448	Yes	No	No
1131		TAG 50:3	TAG 50:3	0.2	0.00283265	0.00425015	79790	normres_TAG50_3_imputed_complete_CHARGE.csv	Lipid	Triacylglycerol	Rhee	1797	#N/A	939	0.0209688	Yes	No	No
1132		TAG 50:3	TAG 50:3	0.3	0.00593452	0.00351652	109794	normres_TAG50_3_imputed_complete_CHARGE.csv	Lipid	Triacylglycerol	Rhee	1797	#N/A	1184	0.0348402	Yes	No	No
1133		TAG 50:3	TAG 50:3	0.4	0.00123947	0.00508224	136596	normres_TAG50_3_imputed_complete_CHARGE.csv	Lipid	Triacylglycerol	Rhee	1797	#N/A	709	0.0121517	Yes	No	No
1134		TAG 50:3	TAG 50:3	0.5	0.000442948	0.0061314	160355	normres_TAG50_3_imputed_complete_CHARGE.csv	Lipid	Triacylglycerol	Rhee	1797	#N/A	513	0.00600182	Yes	Yes	No
1135	MetaAnalysis_PC.ae.C36.5_HetISqLt75_HetDfGt0_HWEPValGt1EMinus6.tsv.fixed_TS_Oct2018.so_RAW.txt	phosphatidylcholine acyl-alkyl c36:5	PC ae C36:5	0.001	0.495563	1.65505e-08	936	MetaAnalysis_PC.ae.C36.5_HetISqLt75_HetDfGt0_HWEPValGt1EMinus6.tsv.fixed	Lipid	Glycerophospholipids	Draaisma	7474	#N/A	6921	0.497711	No	No	No
1136		phosphatidylcholine acyl-alkyl c36:5	PC ae C36:5	0.05	0.165905	0.000126005	24958	MetaAnalysis_PC.ae.C36.5_HetISqLt75_HetDfGt0_HWEPValGt1EMinus6.tsv.fixed	Lipid	Glycerophospholipids	Draaisma	7474	#N/A	4079	0.282717	No	No	No
1137		phosphatidylcholine acyl-alkyl c36:5	PC ae C36:5	0.1	0.0649316	0.000306902	44029	MetaAnalysis_PC.ae.C36.5_HetISqLt75_HetDfGt0_HWEPValGt1EMinus6.tsv.fixed	Lipid	Glycerophospholipids	Draaisma	7474	#N/A	2808	0.160733	No	No	No
1138		phosphatidylcholine acyl-alkyl c36:5	PC ae C36:5	0.2	0.00426894	0.000925051	76931	MetaAnalysis_PC.ae.C36.5_HetISqLt75_HetDfGt0_HWEPValGt1EMinus6.tsv.fixed	Lipid	Glycerophospholipids	Draaisma	7474	#N/A	1073	0.0276546	Yes	No	No
1139		phosphatidylcholine acyl-alkyl c36:5	PC ae C36:5	0.3	0.00188674	0.00112189	105536	MetaAnalysis_PC.ae.C36.5_HetISqLt75_HetDfGt0_HWEPValGt1EMinus6.tsv.fixed	Lipid	Glycerophospholipids	Draaisma	7474	#N/A	822	0.0159547	Yes	No	No
1140		phosphatidylcholine acyl-alkyl c36:5	PC ae C36:5	0.4	0.00054541	0.00142616	130978	MetaAnalysis_PC.ae.C36.5_HetISqLt75_HetDfGt0_HWEPValGt1EMinus6.tsv.fixed	Lipid	Glycerophospholipids	Draaisma	7474	#N/A	541	0.00700766	Yes	Yes	No
1141		phosphatidylcholine acyl-alkyl c36:5	PC ae C36:5	0.5	0.000707009	0.00136212	153391	MetaAnalysis_PC.ae.C36.5_HetISqLt75_HetDfGt0_HWEPValGt1EMinus6.tsv.fixed	Lipid	Glycerophospholipids	Draaisma	7474	#N/A	597	0.00823186	Yes	Yes	No
1142	normres_TAG48_2_imputed_complete_CHARGE.csv_TS_Oct2018.so_RAW.txt	TAG 48:2	TAG 48:2	0.001	0.444647	1.07822e-05	942	normres_TAG48_2_imputed_complete_CHARGE.csv	Lipid	Triacylglycerol	Rhee	1797	#N/A	6531	0.473242	No	No	No
1143		TAG 48:2	TAG 48:2	0.05	0.00799468	0.00322464	25643	normres_TAG48_2_imputed_complete_CHARGE.csv	Lipid	Triacylglycerol	Rhee	1797	#N/A	1306	0.0425506	Yes	No	No
1144		TAG 48:2	TAG 48:2	0.1	0.00347417	0.00404648	45471	normres_TAG48_2_imputed_complete_CHARGE.csv	Lipid	Triacylglycerol	Rhee	1797	#N/A	1009	0.0239336	Yes	No	No
1145		TAG 48:2	TAG 48:2	0.2	0.00124089	0.00508108	79790	normres_TAG48_2_imputed_complete_CHARGE.csv	Lipid	Triacylglycerol	Rhee	1797	#N/A	711	0.0121314	Yes	No	No
1146		TAG 48:2	TAG 48:2	0.3	0.0019526	0.00462333	109794	normres_TAG48_2_imputed_complete_CHARGE.csv	Lipid	Triacylglycerol	Rhee	1797	#N/A	832	0.0163131	Yes	No	No
1147		TAG 48:2	TAG 48:2	0.4	0.000275141	0.00662076	136596	normres_TAG48_2_imputed_complete_CHARGE.csv	Lipid	Triacylglycerol	Rhee	1797	#N/A	440	0.0043466	Yes	Yes	No
1148		TAG 48:2	TAG 48:2	0.5	7.99302e-05	0.00789983	160355	normres_TAG48_2_imputed_complete_CHARGE.csv	Lipid	Triacylglycerol	Rhee	1797	#N/A	279	0.00199138	Yes	Yes	No
1149	normres_PC34_2_imputed_complete_CHARGE.csv_TS_Oct2018.so_RAW.txt	PC 34:2	PC 34:2	0.001	0.152888	0.000583488	942	normres_PC34_2_imputed_complete_CHARGE.csv	Lipid	Glycerophospholipids	Rhee	1797	#N/A	3933	0.270207	No	No	No
1150		PC 34:2	PC 34:2	0.05	0.0763917	0.00113694	25643	normres_PC34_2_imputed_complete_CHARGE.csv	Lipid	Glycerophospholipids	Rhee	1797	#N/A	2967	0.178968	No	No	No
1151		PC 34:2	PC 34:2	0.1	0.18581	0.000444108	45471	normres_PC34_2_imputed_complete_CHARGE.csv	Lipid	Glycerophospholipids	Rhee	1797	#N/A	4274	0.302191	No	No	No
1152		PC 34:2	PC 34:2	0.2	0.16571	0.000524816	79790	normres_PC34_2_imputed_complete_CHARGE.csv	Lipid	Glycerophospholipids	Rhee	1797	#N/A	4075	0.282662	No	No	No
1153		PC 34:2	PC 34:2	0.3	0.420341	2.24871e-05	109794	normres_PC34_2_imputed_complete_CHARGE.csv	Lipid	Glycerophospholipids	Rhee	1797	#N/A	6339	0.460923	No	No	No
1154		PC 34:2	PC 34:2	0.4	0.499154	2.50371e-09	136596	normres_PC34_2_imputed_complete_CHARGE.csv	Lipid	Glycerophospholipids	Rhee	1797	#N/A	6948	0.499369	No	No	No
1155		PC 34:2	PC 34:2	0.5	0.467001	3.81615e-06	160355	normres_PC34_2_imputed_complete_CHARGE.csv	Lipid	Glycerophospholipids	Rhee	1797	#N/A	6714	0.483486	No	No	No
1156	MetaAnalysis_PC.aa.C34.2_HetISqLt75_HetDfGt0_HWEPValGt1EMinus6.tsv.fixed_TS_Oct2018.so_RAW.txt	phosphatidylcholine diacyl c34:2	PC aa C34:2	0.001	0.0517392	0.000354552	936	MetaAnalysis_PC.aa.C34.2_HetISqLt75_HetDfGt0_HWEPValGt1EMinus6.tsv.fixed	Lipid	Glycerophospholipids	Draaisma	7476	#N/A	2558	0.140594	No	No	No
1157		phosphatidylcholine diacyl c34:2	PC aa C34:2	0.05	0.250745	6.04289e-05	24959	MetaAnalysis_PC.aa.C34.2_HetISqLt75_HetDfGt0_HWEPValGt1EMinus6.tsv.fixed	Lipid	Glycerophospholipids	Draaisma	7476	#N/A	4875	0.357524	No	No	No
1158		phosphatidylcholine diacyl c34:2	PC aa C34:2	0.1	0.129495	0.000170418	44040	MetaAnalysis_PC.aa.C34.2_HetISqLt75_HetDfGt0_HWEPValGt1EMinus6.tsv.fixed	Lipid	Glycerophospholipids	Draaisma	7476	#N/A	3666	0.245531	No	No	No
1159		phosphatidylcholine diacyl c34:2	PC aa C34:2	0.2	0.0556613	0.000339074	76922	MetaAnalysis_PC.aa.C34.2_HetISqLt75_HetDfGt0_HWEPValGt1EMinus6.tsv.fixed	Lipid	Glycerophospholipids	Draaisma	7476	#N/A	2639	0.146609	No	No	No
1160		phosphatidylcholine diacyl c34:2	PC aa C34:2	0.3	0.0685117	0.000295712	105523	MetaAnalysis_PC.aa.C34.2_HetISqLt75_HetDfGt0_HWEPValGt1EMinus6.tsv.fixed	Lipid	Glycerophospholipids	Draaisma	7476	#N/A	2851	0.167038	No	No	No
1161		phosphatidylcholine diacyl c34:2	PC aa C34:2	0.4	0.0736956	0.000280732	130962	MetaAnalysis_PC.aa.C34.2_HetISqLt75_HetDfGt0_HWEPValGt1EMinus6.tsv.fixed	Lipid	Glycerophospholipids	Draaisma	7476	#N/A	2926	0.175071	No	No	No
1162		phosphatidylcholine diacyl c34:2	PC aa C34:2	0.5	0.089527	0.000241471	153373	MetaAnalysis_PC.aa.C34.2_HetISqLt75_HetDfGt0_HWEPValGt1EMinus6.tsv.fixed	Lipid	Glycerophospholipids	Draaisma	7476	#N/A	3158	0.197056	No	No	No
1163	M36756	leucylleucine	leucylleucine	0.001	0.0825317	0.000593179	854	M36756.metal.pos.txt	Peptide	Dipeptide	Shin	3248	HMDB0028933	3055	0.187783	No	No	No
1164		leucylleucine	leucylleucine	0.05	0.45901	3.26184e-06	22451	M36756.metal.pos.txt	Peptide	Dipeptide	Shin	3248	HMDB0028933	6653	0.479569	No	No	No
1165		leucylleucine	leucylleucine	0.1	0.455291	3.88313e-06	39517	M36756.metal.pos.txt	Peptide	Dipeptide	Shin	3248	HMDB0028933	6619	0.478128	No	No	No
1166		leucylleucine	leucylleucine	0.2	0.399256	2.00626e-05	68496	M36756.metal.pos.txt	Peptide	Dipeptide	Shin	3248	HMDB0028933	6160	0.450524	No	No	No
1167		leucylleucine	leucylleucine	0.3	0.230802	0.000166859	93653	M36756.metal.pos.txt	Peptide	Dipeptide	Shin	3248	HMDB0028933	4705	0.340978	No	No	No
1168		leucylleucine	leucylleucine	0.4	0.264215	0.000122347	115890	M36756.metal.pos.txt	Peptide	Dipeptide	Shin	3248	HMDB0028933	4997	0.367532	No	No	No
1169		leucylleucine	leucylleucine	0.5	0.267484	0.000118511	135306	M36756.metal.pos.txt	Peptide	Dipeptide	Shin	3248	HMDB0028933	5026	0.369932	No	No	No
1170	normres_ratio_kyu_to_trp_imputed_complete_CHARGE.csv_TS_Oct2018.so_RAW.txt	ratio_kyu_to_trp	ratio_kyu_to_trp	0.001	0.134872	0.000675713	942	normres_ratio_kyu_to_trp_imputed_complete_CHARGE.csv	Amino acid	Ratios	Rhee	1802	#N/A	3730	0.251339	No	No	No
1171		ratio_kyu_to_trp	ratio_kyu_to_trp	0.05	0.0698128	0.00121019	25643	normres_ratio_kyu_to_trp_imputed_complete_CHARGE.csv	Amino acid	Ratios	Rhee	1802	#N/A	2868	0.169201	No	No	No
1172		ratio_kyu_to_trp	ratio_kyu_to_trp	0.1	0.00145454	0.0049067	45471	normres_ratio_kyu_to_trp_imputed_complete_CHARGE.csv	Amino acid	Ratios	Rhee	1802	#N/A	752	0.0134448	Yes	No	No
1173		ratio_kyu_to_trp	ratio_kyu_to_trp	0.2	0.00155389	0.00484013	79790	normres_ratio_kyu_to_trp_imputed_complete_CHARGE.csv	Amino acid	Ratios	Rhee	1802	#N/A	770	0.0140274	Yes	No	No
1174		ratio_kyu_to_trp	ratio_kyu_to_trp	0.3	0.00703681	0.00334007	109794	normres_ratio_kyu_to_trp_imputed_complete_CHARGE.csv	Amino acid	Ratios	Rhee	1802	#N/A	1250	0.0391303	Yes	No	No
1175		ratio_kyu_to_trp	ratio_kyu_to_trp	0.4	0.0114989	0.00286419	136596	normres_ratio_kyu_to_trp_imputed_complete_CHARGE.csv	Amino acid	Ratios	Rhee	1802	#N/A	1478	0.0540792	No	No	No
1176		ratio_kyu_to_trp	ratio_kyu_to_trp	0.5	0.005943	0.00350538	160355	normres_ratio_kyu_to_trp_imputed_complete_CHARGE.csv	Amino acid	Ratios	Rhee	1802	#N/A	1186	0.0348312	Yes	No	No
1177	M33652	X-12230	X-12230	0.001	0.256537	8.02884e-05	856	M33652.metal.pos.txt	Unknown	Unknown	Shin	5328	#N/A	4919	0.36251	No	No	No
1178		X-12230	X-12230	0.05	0.316677	4.27054e-05	22455	M33652.metal.pos.txt	Unknown	Unknown	Shin	5328	#N/A	5463	0.402933	No	No	No
1179		X-12230	X-12230	0.1	0.446892	3.34585e-06	39513	M33652.metal.pos.txt	Unknown	Unknown	Shin	5328	#N/A	6545	0.474614	No	No	No
1180		X-12230	X-12230	0.2	0.433088	5.33e-06	68498	M33652.metal.pos.txt	Unknown	Unknown	Shin	5328	#N/A	6445	0.46709	No	No	No
1181		X-12230	X-12230	0.3	0.467714	1.23199e-06	93678	M33652.metal.pos.txt	Unknown	Unknown	Shin	5328	#N/A	6725	0.483431	No	No	No
1182		X-12230	X-12230	0.4	0.477187	6.14414e-07	115915	M33652.metal.pos.txt	Unknown	Unknown	Shin	5328	#N/A	6787	0.488717	No	No	No
1183		X-12230	X-12230	0.5	0.4514	2.79928e-06	135338	M33652.metal.pos.txt	Unknown	Unknown	Shin	5328	#N/A	6587	0.476344	No	No	No
1184	RANTES	Regulated on Activation, Normal T Cell Expressed and Secreted (CCL5)	RANTES	0.001	0.140837	0.000338731	1994	RANTES	Cytokine	#N/A	Ahola-Olli	3421	#N/A	3803	0.257418	No	No	No
1185		Regulated on Activation, Normal T Cell Expressed and Secreted (CCL5)	RANTES	0.05	0.150658	0.000312247	58628	RANTES	Cytokine	#N/A	Ahola-Olli	3421	#N/A	3913	0.267626	No	No	No
1186		Regulated on Activation, Normal T Cell Expressed and Secreted (CCL5)	RANTES	0.1	0.123479	0.000391748	105412	RANTES	Cytokine	#N/A	Ahola-Olli	3421	#N/A	3582	0.239615	No	No	No
1187		Regulated on Activation, Normal T Cell Expressed and Secreted (CCL5)	RANTES	0.2	0.403988	1.7266e-05	187913	RANTES	Cytokine	#N/A	Ahola-Olli	3421	#N/A	6203	0.452704	No	No	No
1188		Regulated on Activation, Normal T Cell Expressed and Secreted (CCL5)	RANTES	0.3	0.3914	2.22142e-05	259808	RANTES	Cytokine	#N/A	Ahola-Olli	3421	#N/A	6090	0.446735	No	No	No
1189		Regulated on Activation, Normal T Cell Expressed and Secreted (CCL5)	RANTES	0.4	0.333924	5.3822e-05	324311	RANTES	Cytokine	#N/A	Ahola-Olli	3421	#N/A	5630	0.412274	No	No	No
1190		Regulated on Activation, Normal T Cell Expressed and Secreted (CCL5)	RANTES	0.5	0.286944	9.2431e-05	381809	RANTES	Cytokine	#N/A	Ahola-Olli	3421	#N/A	5212	0.382683	No	No	No
1191	M19324	1-stearoylglycerophosphoinositol	1-stearoylglycerophosphoinositol	0.001	0.325166	2.83382e-05	856	M19324.metal.pos.txt	Lipid	Glycerophospholipids	Shin	7251	HMDB0240261	5540	0.407983	No	No	No
1192		1-stearoylglycerophosphoinositol	1-stearoylglycerophosphoinositol	0.05	0.284766	4.46091e-05	22465	M19324.metal.pos.txt	Lipid	Glycerophospholipids	Shin	7251	HMDB0240261	5189	0.381462	No	No	No
1193		1-stearoylglycerophosphoinositol	1-stearoylglycerophosphoinositol	0.1	0.423922	5.07713e-06	39530	M19324.metal.pos.txt	Lipid	Glycerophospholipids	Shin	7251	HMDB0240261	6372	0.462442	No	No	No
1194		1-stearoylglycerophosphoinositol	1-stearoylglycerophosphoinositol	0.2	0.424676	4.97573e-06	68522	M19324.metal.pos.txt	Lipid	Glycerophospholipids	Shin	7251	HMDB0240261	6380	0.462684	No	No	No
1195		1-stearoylglycerophosphoinositol	1-stearoylglycerophosphoinositol	0.3	0.29863	3.84971e-05	93696	M19324.metal.pos.txt	Lipid	Glycerophospholipids	Shin	7251	HMDB0240261	5310	0.390919	No	No	No
1196		1-stearoylglycerophosphoinositol	1-stearoylglycerophosphoinositol	0.4	0.325701	2.81526e-05	115951	M19324.metal.pos.txt	Lipid	Glycerophospholipids	Shin	7251	HMDB0240261	5545	0.408286	No	No	No
1197		1-stearoylglycerophosphoinositol	1-stearoylglycerophosphoinositol	0.5	0.388863	1.09893e-05	135386	M19324.metal.pos.txt	Lipid	Glycerophospholipids	Shin	7251	HMDB0240261	6069	0.445376	No	No	No
1198	M36468	X-14541	X-14541	0.001	0.223386	0.000303323	854	M36468.metal.pos.txt	Unknown	Unknown	Shin	1908	#N/A	4623	0.335876	No	No	No
1199		X-14541	X-14541	0.05	0.415055	2.41278e-05	22454	M36468.metal.pos.txt	Unknown	Unknown	Shin	1908	#N/A	6291	0.458599	No	No	No
1200		X-14541	X-14541	0.1	0.345604	8.26909e-05	39503	M36468.metal.pos.txt	Unknown	Unknown	Shin	1908	#N/A	5730	0.419248	No	No	No
1201		X-14541	X-14541	0.2	0.38111	4.7979e-05	68498	M36468.metal.pos.txt	Unknown	Unknown	Shin	1908	#N/A	6016	0.440342	No	No	No
1202		X-14541	X-14541	0.3	0.180777	0.00043622	93662	M36468.metal.pos.txt	Unknown	Unknown	Shin	1908	#N/A	4220	0.297768	No	No	No
1203		X-14541	X-14541	0.4	0.283737	0.000171331	115908	M36468.metal.pos.txt	Unknown	Unknown	Shin	1908	#N/A	5180	0.380744	No	No	No
1204		X-14541	X-14541	0.5	0.398225	3.48709e-05	135321	M36468.metal.pos.txt	Unknown	Unknown	Shin	1908	#N/A	6149	0.450165	No	No	No
1205	normres_PC34_4_imputed_complete_CHARGE.csv_TS_Oct2018.so_RAW.txt	PC 34:4	PC 34:4	0.001	0.0947534	0.000957498	942	normres_PC34_4_imputed_complete_CHARGE.csv	Lipid	Glycerophospholipids	Rhee	1797	#N/A	3205	0.205501	No	No	No
1206		PC 34:4	PC 34:4	0.05	0.190667	0.000426396	25643	normres_PC34_4_imputed_complete_CHARGE.csv	Lipid	Glycerophospholipids	Rhee	1797	#N/A	4321	0.306717	No	No	No
1207		PC 34:4	PC 34:4	0.1	0.068056	0.00123539	45471	normres_PC34_4_imputed_complete_CHARGE.csv	Lipid	Glycerophospholipids	Rhee	1797	#N/A	2845	0.166277	No	No	No
1208		PC 34:4	PC 34:4	0.2	0.214955	0.000346666	79790	normres_PC34_4_imputed_complete_CHARGE.csv	Lipid	Glycerophospholipids	Rhee	1797	#N/A	4544	0.328818	No	No	No
1209		PC 34:4	PC 34:4	0.3	0.137988	0.000660218	109794	normres_PC34_4_imputed_complete_CHARGE.csv	Lipid	Glycerophospholipids	Rhee	1797	#N/A	3775	0.25408	No	No	No
1210		PC 34:4	PC 34:4	0.4	0.104868	0.000875105	136596	normres_PC34_4_imputed_complete_CHARGE.csv	Lipid	Glycerophospholipids	Rhee	1797	#N/A	3338	0.218375	No	No	No
1211		PC 34:4	PC 34:4	0.5	0.0992404	0.000919732	160355	normres_PC34_4_imputed_complete_CHARGE.csv	Lipid	Glycerophospholipids	Rhee	1797	#N/A	3267	0.211148	No	No	No
1212	normres_tryptophan_imputed_complete_CHARGE.csv_TS_Oct2018.so_RAW.txt	tryptophan	Trp	0.001	0.143452	0.000629153	942	normres_tryptophan_imputed_complete_CHARGE.csv	Amino acid	Tryptophan Metabolism	Rhee	1802	HMDB0000929	3828	0.260485	No	No	No
1213		tryptophan	Trp	0.05	0.271412	0.000205489	25643	normres_tryptophan_imputed_complete_CHARGE.csv	Amino acid	Tryptophan Metabolism	Rhee	1802	HMDB0000929	5058	0.372991	No	No	No
1214		tryptophan	Trp	0.1	0.0894485	0.00100214	45471	normres_tryptophan_imputed_complete_CHARGE.csv	Amino acid	Tryptophan Metabolism	Rhee	1802	HMDB0000929	3156	0.197008	No	No	No
1215		tryptophan	Trp	0.2	0.152742	0.000582573	79790	normres_tryptophan_imputed_complete_CHARGE.csv	Amino acid	Tryptophan Metabolism	Rhee	1802	HMDB0000929	3929	0.270223	No	No	No
1216		tryptophan	Trp	0.3	0.121561	0.000755764	109794	normres_tryptophan_imputed_complete_CHARGE.csv	Amino acid	Tryptophan Metabolism	Rhee	1802	HMDB0000929	3557	0.237551	No	No	No
1217		tryptophan	Trp	0.4	0.161504	0.000541879	136596	normres_tryptophan_imputed_complete_CHARGE.csv	Amino acid	Tryptophan Metabolism	Rhee	1802	HMDB0000929	4021	0.279187	No	No	No
1218		tryptophan	Trp	0.5	0.149239	0.000599699	160355	normres_tryptophan_imputed_complete_CHARGE.csv	Amino acid	Tryptophan Metabolism	Rhee	1802	HMDB0000929	3893	0.266468	No	No	No
1219	M00513	creatinine	Crea	0.001	0.406904	7.53542e-06	856	M00513.metal.pos.txt	Amino acid	Creatine Metabolism	Shin	7361	HMDB0000562	6213	0.455237	No	No	No
1220		creatinine	Crea	0.05	0.194829	0.000100526	22466	M00513.metal.pos.txt	Amino acid	Creatine Metabolism	Shin	7361	HMDB0000562	4361	0.310539	No	No	No
1221		creatinine	Crea	0.1	0.290388	4.14312e-05	39530	M00513.metal.pos.txt	Amino acid	Creatine Metabolism	Shin	7361	HMDB0000562	5235	0.385575	No	No	No
1222		creatinine	Crea	0.2	0.0700484	0.00029569	68524	M00513.metal.pos.txt	Amino acid	Creatine Metabolism	Shin	7361	HMDB0000562	2876	0.1693	No	No	No
1223		creatinine	Crea	0.3	0.0455843	0.000387592	93698	M00513.metal.pos.txt	Amino acid	Creatine Metabolism	Shin	7361	HMDB0000562	2440	0.129859	No	No	No
1224		creatinine	Crea	0.4	0.0580883	0.000335241	115948	M00513.metal.pos.txt	Amino acid	Creatine Metabolism	Shin	7361	HMDB0000562	2686	0.150325	No	No	No
1225		creatinine	Crea	0.5	0.0519073	0.000359389	135381	M00513.metal.pos.txt	Amino acid	Creatine Metabolism	Shin	7361	HMDB0000562	2565	0.140666	No	No	No
1226	M02342	serotonin	5HT	0.001	0.406025	9.76341e-06	857	M02342.metal.pos.txt	Amino acid	Tryptophan Metabolism	Shin	5791	HMDB0000259	6212	0.454327	No	No	No
1227		serotonin	5HT	0.05	0.286749	5.47152e-05	22465	M02342.metal.pos.txt	Amino acid	Tryptophan Metabolism	Shin	5791	HMDB0000259	5210	0.38257	No	No	No
1228		serotonin	5HT	0.1	0.31545	3.98615e-05	39526	M02342.metal.pos.txt	Amino acid	Tryptophan Metabolism	Shin	5791	HMDB0000259	5448	0.402476	No	No	No
1229		serotonin	5HT	0.2	0.444155	3.40595e-06	68517	M02342.metal.pos.txt	Amino acid	Tryptophan Metabolism	Shin	5791	HMDB0000259	6526	0.473081	No	No	No
1230		serotonin	5HT	0.3	0.420249	6.9943e-06	93686	M02342.metal.pos.txt	Amino acid	Tryptophan Metabolism	Shin	5791	HMDB0000259	6338	0.460895	No	No	No
1231		serotonin	5HT	0.4	0.492883	5.49648e-08	115937	M02342.metal.pos.txt	Amino acid	Tryptophan Metabolism	Shin	5791	HMDB0000259	6900	0.496526	No	No	No
1232		serotonin	5HT	0.5	0.479966	4.35819e-07	135372	M02342.metal.pos.txt	Amino acid	Tryptophan Metabolism	Shin	5791	HMDB0000259	6812	0.48976	No	No	No
1233	normres_fumarate_maleate_valerat_imputed_complete_CHARGE.csv_TS_Oct2018.so_RAW.txt	fumarate; maleate; α-ketoisovalerate	fumarate; maleate; α-ketoisovalerate	0.001	0.337008	0.000121601	942	normres_fumarate_maleate_valerat_imputed_complete_CHARGE.csv	Lipid	#N/A	Rhee	1455	#N/A	5657	0.414097	No	No	No
1234		fumarate; maleate; α-ketoisovalerate	fumarate; maleate; α-ketoisovalerate	0.05	0.034574	0.00226762	25642	normres_fumarate_maleate_valerat_imputed_complete_CHARGE.csv	Lipid	#N/A	Rhee	1455	#N/A	2164	0.111055	No	No	No
1235		fumarate; maleate; α-ketoisovalerate	fumarate; maleate; α-ketoisovalerate	0.1	0.0421699	0.00204548	45470	normres_fumarate_maleate_valerat_imputed_complete_CHARGE.csv	Lipid	#N/A	Rhee	1455	#N/A	2366	0.12389	No	No	No
1236		fumarate; maleate; α-ketoisovalerate	fumarate; maleate; α-ketoisovalerate	0.2	0.00615757	0.00429653	79787	normres_fumarate_maleate_valerat_imputed_complete_CHARGE.csv	Lipid	#N/A	Rhee	1455	#N/A	1200	0.0356677	Yes	No	No
1237		fumarate; maleate; α-ketoisovalerate	fumarate; maleate; α-ketoisovalerate	0.3	0.00811543	0.00396305	109791	normres_fumarate_maleate_valerat_imputed_complete_CHARGE.csv	Lipid	#N/A	Rhee	1455	#N/A	1318	0.0428	Yes	No	No
1238		fumarate; maleate; α-ketoisovalerate	fumarate; maleate; α-ketoisovalerate	0.4	0.00345731	0.00500121	136592	normres_fumarate_maleate_valerat_imputed_complete_CHARGE.csv	Lipid	#N/A	Rhee	1455	#N/A	999	0.0240558	Yes	No	No
1239		fumarate; maleate; α-ketoisovalerate	fumarate; maleate; α-ketoisovalerate	0.5	0.0067429	0.00418657	160350	normres_fumarate_maleate_valerat_imputed_complete_CHARGE.csv	Lipid	#N/A	Rhee	1455	#N/A	1231	0.0380747	Yes	No	No
1240	normres_xanthosine_imputed_complete_CHARGE.csv_TS_Oct2018.so_RAW.txt	xanthosine	xanthosine	0.001	0.276161	0.00019597	942	normres_xanthosine_imputed_complete_CHARGE.csv	Nucleotide	Purine Metabolism, (Hypo)Xanthine/Inosine containing	Rhee	1802	HMDB00299	5104	0.376097	No	No	No
1241		xanthosine	xanthosine	0.05	0.467648	3.65752e-06	25643	normres_xanthosine_imputed_complete_CHARGE.csv	Nucleotide	Purine Metabolism, (Hypo)Xanthine/Inosine containing	Rhee	1802	HMDB00299	6722	0.483579	No	No	No
1242		xanthosine	xanthosine	0.1	0.119596	0.000768492	45471	normres_xanthosine_imputed_complete_CHARGE.csv	Nucleotide	Purine Metabolism, (Hypo)Xanthine/Inosine containing	Rhee	1802	HMDB00299	3531	0.235432	No	No	No
1243		xanthosine	xanthosine	0.2	0.0903122	0.000994222	79790	normres_xanthosine_imputed_complete_CHARGE.csv	Nucleotide	Purine Metabolism, (Hypo)Xanthine/Inosine containing	Rhee	1802	HMDB00299	3169	0.198094	No	No	No
1244		xanthosine	xanthosine	0.3	0.380942	5.09494e-05	109794	normres_xanthosine_imputed_complete_CHARGE.csv	Nucleotide	Purine Metabolism, (Hypo)Xanthine/Inosine containing	Rhee	1802	HMDB00299	6014	0.440294	No	No	No
1245		xanthosine	xanthosine	0.4	0.461518	5.17953e-06	136596	normres_xanthosine_imputed_complete_CHARGE.csv	Nucleotide	Purine Metabolism, (Hypo)Xanthine/Inosine containing	Rhee	1802	HMDB00299	6676	0.480529	No	No	No
1246		xanthosine	xanthosine	0.5	0.476162	1.98376e-06	160355	normres_xanthosine_imputed_complete_CHARGE.csv	Nucleotide	Purine Metabolism, (Hypo)Xanthine/Inosine containing	Rhee	1802	HMDB00299	6779	0.488243	No	No	No
1247	M32497	10-undecenoate (11:1n1)	10-undecenoate (11:1n1)	0.001	0.0963236	0.000230642	856	M32497.metal.pos.txt	Lipid	Medium Chain Fatty Acid	Shin	7358	#N/A	3223	0.20774	No	No	No
1248		10-undecenoate (11:1n1)	10-undecenoate (11:1n1)	0.05	0.00985953	0.000738596	22465	M32497.metal.pos.txt	Lipid	Medium Chain Fatty Acid	Shin	7358	#N/A	1406	0.0487436	Yes	No	No
1249		10-undecenoate (11:1n1)	10-undecenoate (11:1n1)	0.1	0.00334116	0.000999288	39529	M32497.metal.pos.txt	Lipid	Medium Chain Fatty Acid	Shin	7358	#N/A	988	0.0235065	Yes	No	No
1250		10-undecenoate (11:1n1)	10-undecenoate (11:1n1)	0.2	0.0118423	0.000695271	68523	M32497.metal.pos.txt	Lipid	Medium Chain Fatty Acid	Shin	7358	#N/A	1495	0.0550607	No	No	No
1251		10-undecenoate (11:1n1)	10-undecenoate (11:1n1)	0.3	0.00582946	0.000864265	93699	M32497.metal.pos.txt	Lipid	Medium Chain Fatty Acid	Shin	7358	#N/A	1180	0.0343395	Yes	No	No
1252		10-undecenoate (11:1n1)	10-undecenoate (11:1n1)	0.4	0.00709024	0.000817216	115951	M32497.metal.pos.txt	Lipid	Medium Chain Fatty Acid	Shin	7358	#N/A	1256	0.0392391	Yes	No	No
1253		10-undecenoate (11:1n1)	10-undecenoate (11:1n1)	0.5	0.00709151	0.000817173	135386	M32497.metal.pos.txt	Lipid	Medium Chain Fatty Acid	Shin	7358	#N/A	1257	0.0392149	Yes	No	No
1254	normres_Ratio_PC3806_LPC2206_imputed_complete_CHARGE.csv_TS_Oct2018.so_RAW.txt	ratio_pc3806_lpc2206	ratio_pc3806_lpc2206	0.001	0.207728	0.000368956	942	normres_Ratio_PC3806_LPC2206_imputed_complete_CHARGE.csv	Lipid	Lipid ratios	Rhee	1797	#N/A	4479	0.322374	No	No	No
1255		ratio_pc3806_lpc2206	ratio_pc3806_lpc2206	0.05	0.0356963	0.00180733	25643	normres_Ratio_PC3806_LPC2206_imputed_complete_CHARGE.csv	Lipid	Lipid ratios	Rhee	1797	#N/A	2193	0.113144	No	No	No
1256		ratio_pc3806_lpc2206	ratio_pc3806_lpc2206	0.1	0.00893581	0.00311627	45471	normres_Ratio_PC3806_LPC2206_imputed_complete_CHARGE.csv	Lipid	Lipid ratios	Rhee	1797	#N/A	1368	0.0454041	Yes	No	No
1257		ratio_pc3806_lpc2206	ratio_pc3806_lpc2206	0.2	0.00248079	0.0043829	79790	normres_Ratio_PC3806_LPC2206_imputed_complete_CHARGE.csv	Lipid	Lipid ratios	Rhee	1797	#N/A	908	0.0189912	Yes	No	No
1258		ratio_pc3806_lpc2206	ratio_pc3806_lpc2206	0.3	0.000940374	0.00536255	109794	normres_Ratio_PC3806_LPC2206_imputed_complete_CHARGE.csv	Lipid	Lipid ratios	Rhee	1797	#N/A	655	0.00997945	Yes	Yes	No
1259		ratio_pc3806_lpc2206	ratio_pc3806_lpc2206	0.4	0.0100499	0.00300228	136596	normres_Ratio_PC3806_LPC2206_imputed_complete_CHARGE.csv	Lipid	Lipid ratios	Rhee	1797	#N/A	1414	0.0494037	Yes	No	No
1260		ratio_pc3806_lpc2206	ratio_pc3806_lpc2206	0.5	0.00803163	0.00322014	160355	normres_Ratio_PC3806_LPC2206_imputed_complete_CHARGE.csv	Lipid	Lipid ratios	Rhee	1797	#N/A	1311	0.0425842	Yes	No	No
1261	Summary_statistics_MAGNETIC_Glol.txt_TS_Oct2018.so_RAW.txt	glycerol	Glol	0.001	0.482882	9.1046e-08	2232	Summary_statistics_MAGNETIC_Glol.txt	Lipid	Glycerolipid Metabolism	Kettunen	20235	HMDB0000131	6831	0.491365	No	No	No
1262		glycerol	Glol	0.05	0.344865	7.87632e-06	68218	Summary_statistics_MAGNETIC_Glol.txt	Lipid	Glycerolipid Metabolism	Kettunen	20235	HMDB0000131	5725	0.418717	No	No	No
1263		glycerol	Glol	0.1	0.0755163	0.000101887	123411	Summary_statistics_MAGNETIC_Glol.txt	Lipid	Glycerolipid Metabolism	Kettunen	20235	HMDB0000131	2954	0.177696	No	No	No
1264		glycerol	Glol	0.2	0.0134712	0.000241854	221757	Summary_statistics_MAGNETIC_Glol.txt	Lipid	Glycerolipid Metabolism	Kettunen	20235	HMDB0000131	1551	0.0603728	No	No	No
1265		glycerol	Glol	0.3	0.00253837	0.00038796	308534	Summary_statistics_MAGNETIC_Glol.txt	Lipid	Glycerolipid Metabolism	Kettunen	20235	HMDB0000131	914	0.0193044	Yes	No	No
1266		glycerol	Glol	0.4	0.00480219	0.000331393	386936	Summary_statistics_MAGNETIC_Glol.txt	Lipid	Glycerolipid Metabolism	Kettunen	20235	HMDB0000131	1115	0.0299372	Yes	No	No
1267		glycerol	Glol	0.5	0.00613227	0.000309921	457076	Summary_statistics_MAGNETIC_Glol.txt	Lipid	Glycerolipid Metabolism	Kettunen	20235	HMDB0000131	1199	0.0355508	Yes	No	No
1268	Summary_statistics_MAGNETIC_S.VLDL.C.txt_TS_Oct2018.so_RAW.txt	total,cholesterol,in,small,vldl	S.VLDL.C	0.001	0.210849	2.99471e-05	2243	Summary_statistics_MAGNETIC_S.VLDL.C.txt	Lipid	Lipid ratios	Kettunen	21557	#N/A	4508	0.325113	No	No	No
1269		total,cholesterol,in,small,vldl	S.VLDL.C	0.05	0.0249788	0.00017825	68667	Summary_statistics_MAGNETIC_S.VLDL.C.txt	Lipid	Lipid ratios	Kettunen	21557	#N/A	1935	0.08973	No	No	No
1270		total,cholesterol,in,small,vldl	S.VLDL.C	0.1	0.00179132	0.000393488	124374	Summary_statistics_MAGNETIC_S.VLDL.C.txt	Lipid	Lipid ratios	Kettunen	21557	#N/A	805	0.0154677	Yes	No	No
1271		total,cholesterol,in,small,vldl	S.VLDL.C	0.2	6.51183e-05	0.000678823	223552	Summary_statistics_MAGNETIC_S.VLDL.C.txt	Lipid	Lipid ratios	Kettunen	21557	#N/A	253	0.00178908	Yes	Yes	No
1272		total,cholesterol,in,small,vldl	S.VLDL.C	0.3	7.5712e-05	0.00066566	311143	Summary_statistics_MAGNETIC_S.VLDL.C.txt	Lipid	Lipid ratios	Kettunen	21557	#N/A	274	0.00192071	Yes	Yes	No
1273		total,cholesterol,in,small,vldl	S.VLDL.C	0.4	2.5607e-05	0.000760606	390345	Summary_statistics_MAGNETIC_S.VLDL.C.txt	Lipid	Lipid ratios	Kettunen	21557	#N/A	171	0.0010409	Yes	Yes	No
1274		total,cholesterol,in,small,vldl	S.VLDL.C	0.5	2.06117e-05	0.000779684	461209	Summary_statistics_MAGNETIC_S.VLDL.C.txt	Lipid	Lipid ratios	Kettunen	21557	#N/A	161	0.000889888	Yes	Yes	No
1275	M01494	5-oxoproline	5-oxoproline	0.001	0.227702	7.57607e-05	856	M01494.metal.pos.txt	Amino acid	Glutathione Metabolism	Shin	7354	HMDB0000267	4672	0.338776	No	No	No
1276		5-oxoproline	5-oxoproline	0.05	0.143592	0.000154023	22463	M01494.metal.pos.txt	Amino acid	Glutathione Metabolism	Shin	7354	HMDB0000267	3829	0.260671	No	No	No
1277		5-oxoproline	5-oxoproline	0.1	0.154073	0.00014122	39526	M01494.metal.pos.txt	Amino acid	Glutathione Metabolism	Shin	7354	HMDB0000267	3952	0.270993	No	No	No
1278		5-oxoproline	5-oxoproline	0.2	0.28703	4.29604e-05	68519	M01494.metal.pos.txt	Amino acid	Glutathione Metabolism	Shin	7354	HMDB0000267	5213	0.382725	No	No	No
1279		5-oxoproline	5-oxoproline	0.3	0.466038	9.87834e-07	93691	M01494.metal.pos.txt	Amino acid	Glutathione Metabolism	Shin	7354	HMDB0000267	6708	0.482921	No	No	No
1280		5-oxoproline	5-oxoproline	0.4	0.341744	2.26032e-05	115944	M01494.metal.pos.txt	Amino acid	Glutathione Metabolism	Shin	7354	HMDB0000267	5696	0.41704	No	No	No
1281		5-oxoproline	5-oxoproline	0.5	0.350842	1.99516e-05	135378	M01494.metal.pos.txt	Amino acid	Glutathione Metabolism	Shin	7354	HMDB0000267	5781	0.421848	No	No	No
1282	Summary_statistics_MAGNETIC_HDL.C.txt_TS_Oct2018.so_RAW.txt	total,cholesterol,in,hdl	HDL.C	0.001	0.168933	4.26116e-05	2243	Summary_statistics_MAGNETIC_HDL.C.txt	Lipid	Lipid ratios	Kettunen	21555	#N/A	4106	0.285984	No	No	No
1283		total,cholesterol,in,hdl	HDL.C	0.05	0.278944	1.593e-05	68668	Summary_statistics_MAGNETIC_HDL.C.txt	Lipid	Lipid ratios	Kettunen	21555	#N/A	5134	0.377667	No	No	No
1284		total,cholesterol,in,hdl	HDL.C	0.1	0.30258	1.24e-05	124377	Summary_statistics_MAGNETIC_HDL.C.txt	Lipid	Lipid ratios	Kettunen	21555	#N/A	5346	0.393422	No	No	No
1285		total,cholesterol,in,hdl	HDL.C	0.2	0.370434	5.07374e-06	223578	Summary_statistics_MAGNETIC_HDL.C.txt	Lipid	Lipid ratios	Kettunen	21555	#N/A	5930	0.434214	No	No	No
1286		total,cholesterol,in,hdl	HDL.C	0.3	0.41194	2.2979e-06	311190	Summary_statistics_MAGNETIC_HDL.C.txt	Lipid	Lipid ratios	Kettunen	21555	#N/A	6266	0.456974	No	No	No
1287		total,cholesterol,in,hdl	HDL.C	0.4	0.345252	7.35512e-06	390408	Summary_statistics_MAGNETIC_HDL.C.txt	Lipid	Lipid ratios	Kettunen	21555	#N/A	5727	0.419041	No	No	No
1288		total,cholesterol,in,hdl	HDL.C	0.5	0.384255	4.0189e-06	461286	Summary_statistics_MAGNETIC_HDL.C.txt	Lipid	Lipid ratios	Kettunen	21555	#N/A	6033	0.442724	No	No	No
1289	MetaAnalysis_Met_HetISqLt75_HetDfGt0_HWEPValGt1EMinus6.tsv.fixed_TS_Oct2018.so_RAW.txt	methionine	Met	0.001	0.255165	5.79769e-05	937	MetaAnalysis_Met_HetISqLt75_HetDfGt0_HWEPValGt1EMinus6.tsv.fixed	Amino acid	Methionine, Cysteine, SAM and Taurine Metabolism	Draaisma	7475	HMDB0000696	4913	0.361012	No	No	No
1290		methionine	Met	0.05	0.447521	2.32837e-06	24954	MetaAnalysis_Met_HetISqLt75_HetDfGt0_HWEPValGt1EMinus6.tsv.fixed	Amino acid	Methionine, Cysteine, SAM and Taurine Metabolism	Draaisma	7475	HMDB0000696	6553	0.474702	No	No	No
1291		methionine	Met	0.1	0.105138	0.000209947	44025	MetaAnalysis_Met_HetISqLt75_HetDfGt0_HWEPValGt1EMinus6.tsv.fixed	Amino acid	Methionine, Cysteine, SAM and Taurine Metabolism	Draaisma	7475	HMDB0000696	3341	0.218742	No	No	No
1292		methionine	Met	0.2	0.0175133	0.000594322	76919	MetaAnalysis_Met_HetISqLt75_HetDfGt0_HWEPValGt1EMinus6.tsv.fixed	Amino acid	Methionine, Cysteine, SAM and Taurine Metabolism	Draaisma	7475	HMDB0000696	1685	0.0722464	No	No	No
1293		methionine	Met	0.3	0.0337593	0.000447035	105489	MetaAnalysis_Met_HetISqLt75_HetDfGt0_HWEPValGt1EMinus6.tsv.fixed	Amino acid	Methionine, Cysteine, SAM and Taurine Metabolism	Draaisma	7475	HMDB0000696	2139	0.109706	No	No	No
1294		methionine	Met	0.4	0.0174141	0.00059562	130918	MetaAnalysis_Met_HetISqLt75_HetDfGt0_HWEPValGt1EMinus6.tsv.fixed	Amino acid	Methionine, Cysteine, SAM and Taurine Metabolism	Draaisma	7475	HMDB0000696	1680	0.0720506	No	No	No
1295		methionine	Met	0.5	0.0196909	0.000567641	153341	MetaAnalysis_Met_HetISqLt75_HetDfGt0_HWEPValGt1EMinus6.tsv.fixed	Amino acid	Methionine, Cysteine, SAM and Taurine Metabolism	Draaisma	7475	HMDB0000696	1753	0.0780785	No	No	No
1296	Summary_statistics_MAGNETIC_His.txt_TS_Oct2018.so_RAW.txt	histidine	His	0.001	0.107568	7.98408e-05	2242	Summary_statistics_MAGNETIC_His.txt	Amino acid	Histidine Metabolism	Kettunen	19244	HMDB0000177	3373	0.221675	No	No	No
1297		histidine	His	0.05	0.164829	4.93774e-05	68614	Summary_statistics_MAGNETIC_His.txt	Amino acid	Histidine Metabolism	Kettunen	19244	HMDB0000177	4065	0.281851	No	No	No
1298		histidine	His	0.1	0.190888	3.97504e-05	124274	Summary_statistics_MAGNETIC_His.txt	Amino acid	Histidine Metabolism	Kettunen	19244	HMDB0000177	4324	0.306861	No	No	No
1299		histidine	His	0.2	0.394505	3.72104e-06	223350	Summary_statistics_MAGNETIC_His.txt	Amino acid	Histidine Metabolism	Kettunen	19244	HMDB0000177	6118	0.448219	No	No	No
1300		histidine	His	0.3	0.331094	9.91876e-06	310857	Summary_statistics_MAGNETIC_His.txt	Amino acid	Histidine Metabolism	Kettunen	19244	HMDB0000177	5592	0.411558	No	No	No
1301		histidine	His	0.4	0.189856	4.00964e-05	389996	Summary_statistics_MAGNETIC_His.txt	Amino acid	Histidine Metabolism	Kettunen	19244	HMDB0000177	4313	0.30598	No	No	No
1302		histidine	His	0.5	0.202122	3.61492e-05	460798	Summary_statistics_MAGNETIC_His.txt	Amino acid	Histidine Metabolism	Kettunen	19244	HMDB0000177	4433	0.316929	No	No	No
1303	normres_aminoadipate_imputed_complete_CHARGE.csv_TS_Oct2018.so_RAW.txt	aminoadipic acid	aminoadipic acid	0.001	0.387495	5.61582e-05	942	normres_aminoadipate_imputed_complete_CHARGE.csv	Amino acid	Lysine Metabolism	Rhee	1455	HMDB0000510	6060	0.444468	No	No	No
1304		aminoadipic acid	aminoadipic acid	0.05	0.135028	0.000835705	25642	normres_aminoadipate_imputed_complete_CHARGE.csv	Amino acid	Lysine Metabolism	Rhee	1455	HMDB0000510	3734	0.251361	No	No	No
1305		aminoadipic acid	aminoadipic acid	0.1	0.252161	0.000306364	45470	normres_aminoadipate_imputed_complete_CHARGE.csv	Amino acid	Lysine Metabolism	Rhee	1455	HMDB0000510	4890	0.35844	No	No	No
1306		aminoadipic acid	aminoadipic acid	0.2	0.0900693	0.00123393	79787	normres_aminoadipate_imputed_complete_CHARGE.csv	Amino acid	Lysine Metabolism	Rhee	1455	HMDB0000510	3165	0.197811	No	No	No
1307		aminoadipic acid	aminoadipic acid	0.3	0.0198661	0.0029025	109791	normres_aminoadipate_imputed_complete_CHARGE.csv	Amino acid	Lysine Metabolism	Rhee	1455	HMDB0000510	1763	0.0783263	No	No	No
1308		aminoadipic acid	aminoadipic acid	0.4	0.0211937	0.00282738	136592	normres_aminoadipate_imputed_complete_CHARGE.csv	Amino acid	Lysine Metabolism	Rhee	1455	HMDB0000510	1813	0.081256	No	No	No
1309		aminoadipic acid	aminoadipic acid	0.5	0.0102886	0.00367862	160350	normres_aminoadipate_imputed_complete_CHARGE.csv	Amino acid	Lysine Metabolism	Rhee	1455	HMDB0000510	1421	0.0503278	No	No	No
1310	M12067	undecanoate (11:0)	undecanoate (11:0)	0.001	0.365256	1.6755e-05	856	M12067.metal.pos.txt	Lipid	Medium Chain Fatty Acid	Shin	7081	HMDB0000947	5881	0.431711	No	No	No
1311		undecanoate (11:0)	undecanoate (11:0)	0.05	0.00264022	0.00109822	22464	M12067.metal.pos.txt	Lipid	Medium Chain Fatty Acid	Shin	7081	HMDB0000947	923	0.0198832	Yes	No	No
1312		undecanoate (11:0)	undecanoate (11:0)	0.1	0.00250325	0.00111181	39525	M12067.metal.pos.txt	Lipid	Medium Chain Fatty Acid	Shin	7081	HMDB0000947	911	0.0191	Yes	No	No
1313		undecanoate (11:0)	undecanoate (11:0)	0.2	2.97259e-05	0.00227393	68518	M12067.metal.pos.txt	Lipid	Medium Chain Fatty Acid	Shin	7081	HMDB0000947	187	0.00110495	Yes	Yes	No
1314		undecanoate (11:0)	undecanoate (11:0)	0.3	5.61489e-05	0.00210452	93695	M12067.metal.pos.txt	Lipid	Medium Chain Fatty Acid	Shin	7081	HMDB0000947	241	0.00161946	Yes	Yes	No
1315		undecanoate (11:0)	undecanoate (11:0)	0.4	1.22324e-05	0.00251142	115947	M12067.metal.pos.txt	Lipid	Medium Chain Fatty Acid	Shin	7081	HMDB0000947	128	0.000664277	Yes	Yes	No
1316		undecanoate (11:0)	undecanoate (11:0)	0.5	2.03606e-05	0.00237501	135381	M12067.metal.pos.txt	Lipid	Medium Chain Fatty Acid	Shin	7081	HMDB0000947	160	0.000884541	Yes	Yes	No
1317	M18476	glycocholate	glycocholate	0.001	0.194841	0.000131558	857	M18476.metal.pos.txt	Lipid	Bile Acid Metabolism	Shin	5624	HMDB0000138	4362	0.310487	No	No	No
1318		glycocholate	glycocholate	0.05	0.00224144	0.00143515	22451	M18476.metal.pos.txt	Lipid	Bile Acid Metabolism	Shin	5624	HMDB0000138	873	0.0178468	Yes	No	No
1319		glycocholate	glycocholate	0.1	0.00532232	0.0011593	39510	M18476.metal.pos.txt	Lipid	Bile Acid Metabolism	Shin	5624	HMDB0000138	1143	0.032367	Yes	No	No
1320		glycocholate	glycocholate	0.2	0.0113253	0.000923311	68501	M18476.metal.pos.txt	Lipid	Bile Acid Metabolism	Shin	5624	HMDB0000138	1472	0.0534798	No	No	No
1321		glycocholate	glycocholate	0.3	0.00309852	0.00133128	93662	M18476.metal.pos.txt	Lipid	Bile Acid Metabolism	Shin	5624	HMDB0000138	966	0.0222959	Yes	No	No
1322		glycocholate	glycocholate	0.4	0.00845331	0.00101407	115909	M18476.metal.pos.txt	Lipid	Bile Acid Metabolism	Shin	5624	HMDB0000138	1340	0.04385	Yes	No	No
1323		glycocholate	glycocholate	0.5	0.00958981	0.00097482	135336	M18476.metal.pos.txt	Lipid	Bile Acid Metabolism	Shin	5624	HMDB0000138	1393	0.0478527	Yes	No	No
1324	M25459	X-10395	X-10395	0.001	0.112543	0.000200477	856	M25459.metal.pos.txt	Unknown	Unknown	Shin	7340	#N/A	3441	0.227343	No	No	No
1325		X-10395	X-10395	0.05	0.44706	2.41327e-06	22466	M25459.metal.pos.txt	Unknown	Unknown	Shin	7340	#N/A	6547	0.474647	No	No	No
1326		X-10395	X-10395	0.1	0.274938	4.87099e-05	39529	M25459.metal.pos.txt	Unknown	Unknown	Shin	7340	#N/A	5091	0.375387	No	No	No
1327		X-10395	X-10395	0.2	0.321241	2.93605e-05	68520	M25459.metal.pos.txt	Unknown	Unknown	Shin	7340	#N/A	5501	0.405917	No	No	No
1328		X-10395	X-10395	0.3	0.176202	0.00011781	93691	M25459.metal.pos.txt	Unknown	Unknown	Shin	7340	#N/A	4174	0.293431	No	No	No
1329		X-10395	X-10395	0.4	0.147479	0.000149424	115940	M25459.metal.pos.txt	Unknown	Unknown	Shin	7340	#N/A	3868	0.265027	No	No	No
1330		X-10395	X-10395	0.5	0.1479	0.000148904	135375	M25459.metal.pos.txt	Unknown	Unknown	Shin	7340	#N/A	3873	0.26544	No	No	No
1331	Summary_statistics_MAGNETIC_XL.HDL.CE.txt_TS_Oct2018.so_RAW.txt	cholesterol,esters,in,very,large,hdl	XL.HDL.CE	0.001	0.174443	4.55294e-05	2242	Summary_statistics_MAGNETIC_XL.HDL.CE.txt	Lipid	Lipid ratios	Kettunen	19273	#N/A	4158	0.291619	No	No	No
1332		cholesterol,esters,in,very,large,hdl	XL.HDL.CE	0.05	0.215828	3.2084e-05	68608	Summary_statistics_MAGNETIC_XL.HDL.CE.txt	Lipid	Lipid ratios	Kettunen	19273	#N/A	4559	0.329067	No	No	No
1333		cholesterol,esters,in,very,large,hdl	XL.HDL.CE	0.1	0.274483	1.8636e-05	124268	Summary_statistics_MAGNETIC_XL.HDL.CE.txt	Lipid	Lipid ratios	Kettunen	19273	#N/A	5086	0.375133	No	No	No
1334		cholesterol,esters,in,very,large,hdl	XL.HDL.CE	0.2	0.474557	2.11331e-07	223328	Summary_statistics_MAGNETIC_XL.HDL.CE.txt	Lipid	Lipid ratios	Kettunen	19273	#N/A	6770	0.487244	No	No	No
1335		cholesterol,esters,in,very,large,hdl	XL.HDL.CE	0.3	0.485714	6.6567e-08	310831	Summary_statistics_MAGNETIC_XL.HDL.CE.txt	Lipid	Lipid ratios	Kettunen	19273	#N/A	6855	0.492516	No	No	No
1336		cholesterol,esters,in,very,large,hdl	XL.HDL.CE	0.4	0.402322	3.17424e-06	389972	Summary_statistics_MAGNETIC_XL.HDL.CE.txt	Lipid	Lipid ratios	Kettunen	19273	#N/A	6189	0.451857	No	No	No
1337		cholesterol,esters,in,very,large,hdl	XL.HDL.CE	0.5	0.469697	2.99947e-07	460772	Summary_statistics_MAGNETIC_XL.HDL.CE.txt	Lipid	Lipid ratios	Kettunen	19273	#N/A	6735	0.484761	No	No	No
1338	normres_inositol_imputed_complete_CHARGE.csv_TS_Oct2018.so_RAW.txt	myo-Inositol	myo-Inositol	0.001	0.0700719	0.00151338	942	normres_inositol_imputed_complete_CHARGE.csv	Lipid	Inositol Metabolism	Rhee	1437	HMDB0000211	2878	0.169239	No	No	No
1339		myo-Inositol	myo-Inositol	0.05	0.0493594	0.00189529	25642	normres_inositol_imputed_complete_CHARGE.csv	Lipid	Inositol Metabolism	Rhee	1437	HMDB0000211	2520	0.13615	No	No	No
1340		myo-Inositol	myo-Inositol	0.1	0.0215286	0.00284435	45470	normres_inositol_imputed_complete_CHARGE.csv	Lipid	Inositol Metabolism	Rhee	1437	HMDB0000211	1822	0.0821323	No	No	No
1341		myo-Inositol	myo-Inositol	0.2	0.199745	0.000493865	79787	normres_inositol_imputed_complete_CHARGE.csv	Lipid	Inositol Metabolism	Rhee	1437	HMDB0000211	4412	0.314694	No	No	No
1342		myo-Inositol	myo-Inositol	0.3	0.335196	0.00012605	109791	normres_inositol_imputed_complete_CHARGE.csv	Lipid	Inositol Metabolism	Rhee	1437	HMDB0000211	5642	0.412964	No	No	No
1343		myo-Inositol	myo-Inositol	0.4	0.343317	0.000113253	136592	normres_inositol_imputed_complete_CHARGE.csv	Lipid	Inositol Metabolism	Rhee	1437	HMDB0000211	5708	0.418079	No	No	No
1344		myo-Inositol	myo-Inositol	0.5	0.266011	0.00027173	160350	normres_inositol_imputed_complete_CHARGE.csv	Lipid	Inositol Metabolism	Rhee	1437	HMDB0000211	5012	0.368923	No	No	No
1345	M01123	inosine	inosine	0.001	0.361854	4.73528e-05	857	M01123.metal.pos.txt	Nucleotide	Purine Metabolism, (Hypo)Xanthine/Inosine containing	Shin	2639	HMDB0000195	5850	0.429957	No	No	No
1346		inosine	inosine	0.05	0.0301823	0.00133573	22465	M01123.metal.pos.txt	Nucleotide	Purine Metabolism, (Hypo)Xanthine/Inosine containing	Shin	2639	HMDB0000195	2051	0.10229	No	No	No
1347		inosine	inosine	0.1	0.0649101	0.000869138	39528	M01123.metal.pos.txt	Nucleotide	Purine Metabolism, (Hypo)Xanthine/Inosine containing	Shin	2639	HMDB0000195	2807	0.160738	No	No	No
1348		inosine	inosine	0.2	0.0930192	0.000662423	68519	M01123.metal.pos.txt	Nucleotide	Purine Metabolism, (Hypo)Xanthine/Inosine containing	Shin	2639	HMDB0000195	3190	0.202689	No	No	No
1349		inosine	inosine	0.3	0.0545801	0.000971994	93695	M01123.metal.pos.txt	Nucleotide	Purine Metabolism, (Hypo)Xanthine/Inosine containing	Shin	2639	HMDB0000195	2618	0.144914	No	No	No
1350		inosine	inosine	0.4	0.0845405	0.00071633	115948	M01123.metal.pos.txt	Nucleotide	Purine Metabolism, (Hypo)Xanthine/Inosine containing	Shin	2639	HMDB0000195	3086	0.190422	No	No	No
1351		inosine	inosine	0.5	0.137222	0.000452491	135382	M01123.metal.pos.txt	Nucleotide	Purine Metabolism, (Hypo)Xanthine/Inosine containing	Shin	2639	HMDB0000195	3761	0.253612	No	No	No
1352	M15749	3-phenylpropionate (hydrocinnamate)	3-phenylpropionate	0.001	0.249387	7.84914e-05	856	M15749.metal.pos.txt	Amino acid	Phenylalanine and Tyrosine Metabolism	Shin	5829	HMDB0000764	4863	0.356465	No	No	No
1353		3-phenylpropionate (hydrocinnamate)	3-phenylpropionate	0.05	0.262883	6.90605e-05	22460	M15749.metal.pos.txt	Amino acid	Phenylalanine and Tyrosine Metabolism	Shin	5829	HMDB0000764	4978	0.367075	No	No	No
1354		3-phenylpropionate (hydrocinnamate)	3-phenylpropionate	0.1	0.493001	5.28093e-08	39527	M15749.metal.pos.txt	Amino acid	Phenylalanine and Tyrosine Metabolism	Shin	5829	HMDB0000764	6901	0.496573	No	No	No
1355		3-phenylpropionate (hydrocinnamate)	3-phenylpropionate	0.2	0.390617	1.32308e-05	68514	M15749.metal.pos.txt	Amino acid	Phenylalanine and Tyrosine Metabolism	Shin	5829	HMDB0000764	6082	0.446429	No	No	No
1356		3-phenylpropionate (hydrocinnamate)	3-phenylpropionate	0.3	0.215582	0.000106305	93684	M15749.metal.pos.txt	Amino acid	Phenylalanine and Tyrosine Metabolism	Shin	5829	HMDB0000764	4555	0.328981	No	No	No
1357		3-phenylpropionate (hydrocinnamate)	3-phenylpropionate	0.4	0.134705	0.000209233	115925	M15749.metal.pos.txt	Amino acid	Phenylalanine and Tyrosine Metabolism	Shin	5829	HMDB0000764	3728	0.251163	No	No	No
1358		3-phenylpropionate (hydrocinnamate)	3-phenylpropionate	0.5	0.153939	0.000178361	135356	M15749.metal.pos.txt	Amino acid	Phenylalanine and Tyrosine Metabolism	Shin	5829	HMDB0000764	3950	0.270893	No	No	No
1359	M32632	X-11315	X-11315	0.001	0.126164	0.000178582	856	M32632.metal.pos.txt	Unknown	Unknown	Shin	7337	#N/A	3620	0.242255	No	No	No
1360		X-11315	X-11315	0.05	0.099199	0.000225425	22465	M32632.metal.pos.txt	Unknown	Unknown	Shin	7337	#N/A	3266	0.211124	No	No	No
1361		X-11315	X-11315	0.1	0.0395343	0.000420239	39529	M32632.metal.pos.txt	Unknown	Unknown	Shin	7337	#N/A	2305	0.11922	No	No	No
1362		X-11315	X-11315	0.2	0.039447	0.000420729	68524	M32632.metal.pos.txt	Unknown	Unknown	Shin	7337	#N/A	2302	0.119112	No	No	No
1363		X-11315	X-11315	0.3	0.0183131	0.000595122	93698	M32632.metal.pos.txt	Unknown	Unknown	Shin	7337	#N/A	1712	0.0743541	No	No	No
1364		X-11315	X-11315	0.4	0.0292079	0.000488064	115948	M32632.metal.pos.txt	Unknown	Unknown	Shin	7337	#N/A	2030	0.100012	No	No	No
1365		X-11315	X-11315	0.5	0.0519885	0.000360227	135383	M32632.metal.pos.txt	Unknown	Unknown	Shin	7337	#N/A	2567	0.140776	No	No	No
1366	normres_LPC16_1_imputed_complete_CHARGE.csv_TS_Oct2018.so_RAW.txt	LPC 16:1	LPC 16:1	0.001	0.22761	0.00031026	942	normres_LPC16_1_imputed_complete_CHARGE.csv	Lipid	Glycerophospholipids	Rhee	1797	#N/A	4669	0.338855	No	No	No
1367		LPC 16:1	LPC 16:1	0.05	0.433635	1.55435e-05	25643	normres_LPC16_1_imputed_complete_CHARGE.csv	Lipid	Glycerophospholipids	Rhee	1797	#N/A	6447	0.467534	No	No	No
1368		LPC 16:1	LPC 16:1	0.1	0.376618	5.49969e-05	45471	normres_LPC16_1_imputed_complete_CHARGE.csv	Lipid	Glycerophospholipids	Rhee	1797	#N/A	5981	0.437698	No	No	No
1369		LPC 16:1	LPC 16:1	0.2	0.420145	2.25995e-05	79790	normres_LPC16_1_imputed_complete_CHARGE.csv	Lipid	Glycerophospholipids	Rhee	1797	#N/A	6337	0.460853	No	No	No
1370		LPC 16:1	LPC 16:1	0.3	0.302318	0.000149159	109794	normres_LPC16_1_imputed_complete_CHARGE.csv	Lipid	Glycerophospholipids	Rhee	1797	#N/A	5344	0.393229	No	No	No
1371		LPC 16:1	LPC 16:1	0.4	0.451285	8.33934e-06	136596	normres_LPC16_1_imputed_complete_CHARGE.csv	Lipid	Glycerophospholipids	Rhee	1797	#N/A	6586	0.476295	No	No	No
1372		LPC 16:1	LPC 16:1	0.5	0.49335	1.54647e-07	160355	normres_LPC16_1_imputed_complete_CHARGE.csv	Lipid	Glycerophospholipids	Rhee	1797	#N/A	6905	0.496636	No	No	No
1373	M32980	adrenate (22:4n6)	adrenate (22:4n6)	0.001	0.369314	1.5189e-05	856	M32980.metal.pos.txt	Lipid	Polyunsaturated Fatty Acid (n3 and n6)	Shin	7330	HMDB0002226	5922	0.433485	No	No	No
1374		adrenate (22:4n6)	adrenate (22:4n6)	0.05	0.000422315	0.0015187	22466	M32980.metal.pos.txt	Lipid	Polyunsaturated Fatty Acid (n3 and n6)	Shin	7330	HMDB0002226	505	0.00581289	Yes	Yes	No
1375		adrenate (22:4n6)	adrenate (22:4n6)	0.1	0.000541677	0.00145588	39531	M32980.metal.pos.txt	Lipid	Polyunsaturated Fatty Acid (n3 and n6)	Shin	7330	HMDB0002226	537	0.00701154	Yes	Yes	No
1376		adrenate (22:4n6)	adrenate (22:4n6)	0.2	0.000555501	0.00144953	68525	M32980.metal.pos.txt	Lipid	Polyunsaturated Fatty Acid (n3 and n6)	Shin	7330	HMDB0002226	544	0.00709795	Yes	Yes	No
1377		adrenate (22:4n6)	adrenate (22:4n6)	0.3	6.99632e-05	0.00197664	93700	M32980.metal.pos.txt	Lipid	Polyunsaturated Fatty Acid (n3 and n6)	Shin	7330	HMDB0002226	265	0.00183515	Yes	Yes	No
1378		adrenate (22:4n6)	adrenate (22:4n6)	0.4	5.05663e-05	0.00206001	115952	M32980.metal.pos.txt	Lipid	Polyunsaturated Fatty Acid (n3 and n6)	Shin	7330	HMDB0002226	229	0.00153487	Yes	Yes	No
1379		adrenate (22:4n6)	adrenate (22:4n6)	0.5	7.14273e-05	0.00197133	135388	M32980.metal.pos.txt	Lipid	Polyunsaturated Fatty Acid (n3 and n6)	Shin	7330	HMDB0002226	267	0.00185952	Yes	Yes	No
1380	MetaAnalysis_xLeu_HetISqLt75_HetDfGt0_HWEPValGt1EMinus6.tsv.fixed_TS_Oct2018.so_RAW.txt	Leucine/Isoleucine	xLeu	0.001	0.316741	3.47865e-05	929	MetaAnalysis_xLeu_HetISqLt75_HetDfGt0_HWEPValGt1EMinus6.tsv.fixed	Amino acid	Leucine, Isoleucine And Valine Metabolism	Draaisma	6536	#N/A	5464	0.40294	No	No	No
1381		Leucine/Isoleucine	xLeu	0.05	0.00473064	0.0010297	24890	MetaAnalysis_xLeu_HetISqLt75_HetDfGt0_HWEPValGt1EMinus6.tsv.fixed	Amino acid	Leucine, Isoleucine And Valine Metabolism	Draaisma	6536	#N/A	1107	0.0297043	Yes	No	No
1382		Leucine/Isoleucine	xLeu	0.1	0.00129588	0.00138745	43921	MetaAnalysis_xLeu_HetISqLt75_HetDfGt0_HWEPValGt1EMinus6.tsv.fixed	Amino acid	Leucine, Isoleucine And Valine Metabolism	Draaisma	6536	#N/A	722	0.0124759	Yes	No	No
1383		Leucine/Isoleucine	xLeu	0.2	0.00020468	0.00190897	76737	MetaAnalysis_xLeu_HetISqLt75_HetDfGt0_HWEPValGt1EMinus6.tsv.fixed	Amino acid	Leucine, Isoleucine And Valine Metabolism	Draaisma	6536	#N/A	395	0.00360185	Yes	Yes	No
1384		Leucine/Isoleucine	xLeu	0.3	0.0001387	0.00202016	105249	MetaAnalysis_xLeu_HetISqLt75_HetDfGt0_HWEPValGt1EMinus6.tsv.fixed	Amino acid	Leucine, Isoleucine And Valine Metabolism	Draaisma	6536	#N/A	353	0.00273117	Yes	Yes	No
1385		Leucine/Isoleucine	xLeu	0.4	2.36796e-05	0.00252908	130598	MetaAnalysis_xLeu_HetISqLt75_HetDfGt0_HWEPValGt1EMinus6.tsv.fixed	Amino acid	Leucine, Isoleucine And Valine Metabolism	Draaisma	6536	#N/A	167	0.00098561	Yes	Yes	No
1386		Leucine/Isoleucine	xLeu	0.5	4.12379e-05	0.00236877	152942	MetaAnalysis_xLeu_HetISqLt75_HetDfGt0_HWEPValGt1EMinus6.tsv.fixed	Amino acid	Leucine, Isoleucine And Valine Metabolism	Draaisma	6536	#N/A	213	0.00134575	Yes	Yes	No
1387	MetaAnalysis_lysoPC.a.C20.3_HetISqLt75_HetDfGt0_HWEPValGt1EMinus6.tsv.fixed_TS_Oct2018.so_RAW.txt	lysoPhosphatidylcholine acyl C20:3	lysoPC a C20:3	0.001	0.271981	4.92561e-05	936	MetaAnalysis_lysoPC.a.C20.3_HetISqLt75_HetDfGt0_HWEPValGt1EMinus6.tsv.fixed	Lipid	Glycerophospholipids	Draaisma	7476	#N/A	5063	0.373402	No	No	No
1388		lysoPhosphatidylcholine acyl C20:3	lysoPC a C20:3	0.05	0.182854	0.000109437	24942	MetaAnalysis_lysoPC.a.C20.3_HetISqLt75_HetDfGt0_HWEPValGt1EMinus6.tsv.fixed	Lipid	Glycerophospholipids	Draaisma	7476	#N/A	4248	0.299203	No	No	No
1389		lysoPhosphatidylcholine acyl C20:3	lysoPC a C20:3	0.1	0.056275	0.000336761	44024	MetaAnalysis_lysoPC.a.C20.3_HetISqLt75_HetDfGt0_HWEPValGt1EMinus6.tsv.fixed	Lipid	Glycerophospholipids	Draaisma	7476	#N/A	2650	0.14761	No	No	No
1390		lysoPhosphatidylcholine acyl C20:3	lysoPC a C20:3	0.2	0.038287	0.000419409	76947	MetaAnalysis_lysoPC.a.C20.3_HetISqLt75_HetDfGt0_HWEPValGt1EMinus6.tsv.fixed	Lipid	Glycerophospholipids	Draaisma	7476	#N/A	2273	0.117085	No	No	No
1391		lysoPhosphatidylcholine acyl C20:3	lysoPC a C20:3	0.3	0.0305304	0.00046917	105538	MetaAnalysis_lysoPC.a.C20.3_HetISqLt75_HetDfGt0_HWEPValGt1EMinus6.tsv.fixed	Lipid	Glycerophospholipids	Draaisma	7476	#N/A	2061	0.102968	No	No	No
1392		lysoPhosphatidylcholine acyl C20:3	lysoPC a C20:3	0.4	0.0464991	0.000377363	130956	MetaAnalysis_lysoPC.a.C20.3_HetISqLt75_HetDfGt0_HWEPValGt1EMinus6.tsv.fixed	Lipid	Glycerophospholipids	Draaisma	7476	#N/A	2460	0.131388	No	No	No
1393		lysoPhosphatidylcholine acyl C20:3	lysoPC a C20:3	0.5	0.0188735	0.000577199	153380	MetaAnalysis_lysoPC.a.C20.3_HetISqLt75_HetDfGt0_HWEPValGt1EMinus6.tsv.fixed	Lipid	Glycerophospholipids	Draaisma	7476	#N/A	1727	0.0759641	No	No	No
1394	normres_TAG50_5_imputed_complete_CHARGE.csv_TS_Oct2018.so_RAW.txt	TAG 50:5	TAG 50:5	0.001	0.0758101	0.0011434	942	normres_TAG50_5_imputed_complete_CHARGE.csv	Lipid	Triacylglycerol	Rhee	1797	#N/A	2960	0.178026	No	No	No
1395		TAG 50:5	TAG 50:5	0.05	0.42547	1.9651e-05	25643	normres_TAG50_5_imputed_complete_CHARGE.csv	Lipid	Triacylglycerol	Rhee	1797	#N/A	6392	0.462679	No	No	No
1396		TAG 50:5	TAG 50:5	0.1	0.258325	0.000234015	45471	normres_TAG50_5_imputed_complete_CHARGE.csv	Lipid	Triacylglycerol	Rhee	1797	#N/A	4944	0.363192	No	No	No
1397		TAG 50:5	TAG 50:5	0.2	0.24357	0.000268655	79790	normres_TAG50_5_imputed_complete_CHARGE.csv	Lipid	Triacylglycerol	Rhee	1797	#N/A	4803	0.352499	No	No	No
1398		TAG 50:5	TAG 50:5	0.3	0.219327	0.000333723	109794	normres_TAG50_5_imputed_complete_CHARGE.csv	Lipid	Triacylglycerol	Rhee	1797	#N/A	4587	0.332362	No	No	No
1399		TAG 50:5	TAG 50:5	0.4	0.226271	0.000313961	136596	normres_TAG50_5_imputed_complete_CHARGE.csv	Lipid	Triacylglycerol	Rhee	1797	#N/A	4660	0.337513	No	No	No
1400		TAG 50:5	TAG 50:5	0.5	0.23975	0.000278202	160355	normres_TAG50_5_imputed_complete_CHARGE.csv	Lipid	Triacylglycerol	Rhee	1797	#N/A	4770	0.349372	No	No	No
1401	M12593	X-02973	X-02973	0.001	0.0542288	0.000352215	856	M12593.metal.pos.txt	Unknown	Unknown	Shin	7314	#N/A	2610	0.144423	No	No	No
1402		X-02973	X-02973	0.05	0.0187693	0.000591267	22466	M12593.metal.pos.txt	Unknown	Unknown	Shin	7314	#N/A	1722	0.075764	No	No	No
1403		X-02973	X-02973	0.1	0.025555	0.000520054	39532	M12593.metal.pos.txt	Unknown	Unknown	Shin	7314	#N/A	1946	0.0912808	No	No	No
1404		X-02973	X-02973	0.2	0.031871	0.000469843	68523	M12593.metal.pos.txt	Unknown	Unknown	Shin	7314	#N/A	2090	0.105998	No	No	No
1405		X-02973	X-02973	0.3	0.020074	0.000575664	93699	M12593.metal.pos.txt	Unknown	Unknown	Shin	7314	#N/A	1772	0.078744	No	No	No
1406		X-02973	X-02973	0.4	0.0154399	0.000636881	115944	M12593.metal.pos.txt	Unknown	Unknown	Shin	7314	#N/A	1608	0.0667432	No	No	No
1407		X-02973	X-02973	0.5	0.0379391	0.000430731	135375	M12593.metal.pos.txt	Unknown	Unknown	Shin	7314	#N/A	2263	0.116533	No	No	No
1408	normres_phosphocreatine_imputed_complete_CHARGE.csv_TS_Oct2018.so_RAW.txt	phosphocreatine	phosphocreatine	0.001	0.363014	8.43885e-05	942	normres_phosphocreatine_imputed_complete_CHARGE.csv	Amino acid	Creatine Metabolism	Rhee	1455	HMDB0001511	5861	0.430525	No	No	No
1409		phosphocreatine	phosphocreatine	0.05	0.208748	0.000451688	25642	normres_phosphocreatine_imputed_complete_CHARGE.csv	Amino acid	Creatine Metabolism	Rhee	1455	HMDB0001511	4489	0.323236	No	No	No
1410		phosphocreatine	phosphocreatine	0.1	0.427813	2.27514e-05	45470	normres_phosphocreatine_imputed_complete_CHARGE.csv	Amino acid	Creatine Metabolism	Rhee	1455	HMDB0001511	6412	0.463776	No	No	No
1411		phosphocreatine	phosphocreatine	0.2	0.403801	4.0757e-05	79787	normres_phosphocreatine_imputed_complete_CHARGE.csv	Amino acid	Creatine Metabolism	Rhee	1455	HMDB0001511	6201	0.45264	No	No	No
1412		phosphocreatine	phosphocreatine	0.3	0.395018	4.87247e-05	109791	normres_phosphocreatine_imputed_complete_CHARGE.csv	Amino acid	Creatine Metabolism	Rhee	1455	HMDB0001511	6127	0.448143	No	No	No
1413		phosphocreatine	phosphocreatine	0.4	0.413861	3.25492e-05	136592	normres_phosphocreatine_imputed_complete_CHARGE.csv	Amino acid	Creatine Metabolism	Rhee	1455	HMDB0001511	6284	0.45779	No	No	No
1414		phosphocreatine	phosphocreatine	0.5	0.477685	2.15256e-06	160350	normres_phosphocreatine_imputed_complete_CHARGE.csv	Amino acid	Creatine Metabolism	Rhee	1455	HMDB0001511	6792	0.488868	No	No	No
1415	normres_PC32_2_imputed_complete_CHARGE.csv_TS_Oct2018.so_RAW.txt	PC 32:2	PC 32:2	0.001	0.298637	0.000155317	942	normres_PC32_2_imputed_complete_CHARGE.csv	Lipid	Glycerophospholipids	Rhee	1797	#N/A	5311	0.390854	No	No	No
1416		PC 32:2	PC 32:2	0.05	0.112295	0.000820362	25643	normres_PC32_2_imputed_complete_CHARGE.csv	Lipid	Glycerophospholipids	Rhee	1797	#N/A	3438	0.22704	No	No	No
1417		PC 32:2	PC 32:2	0.1	0.0555259	0.00141202	45471	normres_PC32_2_imputed_complete_CHARGE.csv	Lipid	Glycerophospholipids	Rhee	1797	#N/A	2637	0.146364	No	No	No
1418		PC 32:2	PC 32:2	0.2	0.137934	0.000660516	79790	normres_PC32_2_imputed_complete_CHARGE.csv	Lipid	Glycerophospholipids	Rhee	1797	#N/A	3774	0.254048	No	No	No
1419		PC 32:2	PC 32:2	0.3	0.0740432	0.0011634	109794	normres_PC32_2_imputed_complete_CHARGE.csv	Lipid	Glycerophospholipids	Rhee	1797	#N/A	2933	0.175477	No	No	No
1420		PC 32:2	PC 32:2	0.4	0.044643	0.00160539	136596	normres_PC32_2_imputed_complete_CHARGE.csv	Lipid	Glycerophospholipids	Rhee	1797	#N/A	2416	0.128441	No	No	No
1421		PC 32:2	PC 32:2	0.5	0.0327437	0.00188617	160355	normres_PC32_2_imputed_complete_CHARGE.csv	Lipid	Glycerophospholipids	Rhee	1797	#N/A	2109	0.107919	No	No	No
1422	normres_ornithine_imputed_complete_CHARGE.csv_TS_Oct2018.so_RAW.txt	ornithine	Orn	0.001	0.398477	3.67358e-05	942	normres_ornithine_imputed_complete_CHARGE.csv	Amino acid	Urea cycle; Arginine and Proline Metabolism	Rhee	1802	HMDB0000214	6151	0.450303	No	No	No
1423		ornithine	Orn	0.05	0.00366435	0.00398239	25643	normres_ornithine_imputed_complete_CHARGE.csv	Amino acid	Urea cycle; Arginine and Proline Metabolism	Rhee	1802	HMDB0000214	1021	0.024947	Yes	No	No
1424		ornithine	Orn	0.1	0.00298975	0.0041846	45471	normres_ornithine_imputed_complete_CHARGE.csv	Amino acid	Urea cycle; Arginine and Proline Metabolism	Rhee	1802	HMDB0000214	956	0.0217383	Yes	No	No
1425		ornithine	Orn	0.2	0.0561723	0.00139798	79790	normres_ornithine_imputed_complete_CHARGE.csv	Amino acid	Urea cycle; Arginine and Proline Metabolism	Rhee	1802	HMDB0000214	2648	0.147452	No	No	No
1426		ornithine	Orn	0.3	0.0203192	0.00232306	109794	normres_ornithine_imputed_complete_CHARGE.csv	Amino acid	Urea cycle; Arginine and Proline Metabolism	Rhee	1802	HMDB0000214	1786	0.079081	No	No	No
1427		ornithine	Orn	0.4	0.0109103	0.00291474	136596	normres_ornithine_imputed_complete_CHARGE.csv	Amino acid	Urea cycle; Arginine and Proline Metabolism	Rhee	1802	HMDB0000214	1452	0.0522296	No	No	No
1428		ornithine	Orn	0.5	0.0115652	0.00285866	160355	normres_ornithine_imputed_complete_CHARGE.csv	Amino acid	Urea cycle; Arginine and Proline Metabolism	Rhee	1802	HMDB0000214	1481	0.0542808	No	No	No
1429	M00527	lactate	Lac	0.001	0.3261	2.75812e-05	856	M00527.metal.pos.txt	Carbohydrate	Glycolysis, Gluconeogenesis, and Pyruvate Metabolism	Shin	7365	HMDB0000190	5548	0.408565	No	No	No
1430		lactate	Lac	0.05	0.077869	0.000273571	22464	M00527.metal.pos.txt	Carbohydrate	Glycolysis, Gluconeogenesis, and Pyruvate Metabolism	Shin	7365	HMDB0000190	2982	0.181512	No	No	No
1431		lactate	Lac	0.1	0.421583	5.31463e-06	39529	M00527.metal.pos.txt	Carbohydrate	Glycolysis, Gluconeogenesis, and Pyruvate Metabolism	Shin	7365	HMDB0000190	6350	0.461484	No	No	No
1432		lactate	Lac	0.2	0.490106	8.35256e-08	68522	M00527.metal.pos.txt	Carbohydrate	Glycolysis, Gluconeogenesis, and Pyruvate Metabolism	Shin	7365	HMDB0000190	6882	0.49502	No	No	No
1433		lactate	Lac	0.3	0.437943	3.31218e-06	93693	M00527.metal.pos.txt	Carbohydrate	Glycolysis, Gluconeogenesis, and Pyruvate Metabolism	Shin	7365	HMDB0000190	6480	0.469775	No	No	No
1434		lactate	Lac	0.4	0.339972	2.31075e-05	115943	M00527.metal.pos.txt	Carbohydrate	Glycolysis, Gluconeogenesis, and Pyruvate Metabolism	Shin	7365	HMDB0000190	5680	0.416047	No	No	No
1435		lactate	Lac	0.5	0.39906	8.88307e-06	135379	M00527.metal.pos.txt	Carbohydrate	Glycolysis, Gluconeogenesis, and Pyruvate Metabolism	Shin	7365	HMDB0000190	6158	0.450449	No	No	No
1436	M21184	1-oleoylglycerol (1-monoolein)	1-oleoylglycerol (1-monoolein)	0.001	0.21062	0.000118987	856	M21184.metal.pos.txt	Lipid	Monoacylglycerol	Shin	5436	HMDB11567	4505	0.324976	No	No	No
1437		1-oleoylglycerol (1-monoolein)	1-oleoylglycerol (1-monoolein)	0.05	0.00719915	0.00110106	22462	M21184.metal.pos.txt	Lipid	Monoacylglycerol	Shin	5436	HMDB11567	1267	0.0394959	Yes	No	No
1438		1-oleoylglycerol (1-monoolein)	1-oleoylglycerol (1-monoolein)	0.1	0.0821825	0.00035564	39532	M21184.metal.pos.txt	Lipid	Monoacylglycerol	Shin	5436	HMDB11567	3050	0.187295	No	No	No
1439		1-oleoylglycerol (1-monoolein)	1-oleoylglycerol (1-monoolein)	0.2	0.0361949	0.00059364	68526	M21184.metal.pos.txt	Lipid	Monoacylglycerol	Shin	5436	HMDB11567	2208	0.113945	No	No	No
1440		1-oleoylglycerol (1-monoolein)	1-oleoylglycerol (1-monoolein)	0.3	0.120285	0.000253325	93709	M21184.metal.pos.txt	Lipid	Monoacylglycerol	Shin	5436	HMDB11567	3542	0.236053	No	No	No
1441		1-oleoylglycerol (1-monoolein)	1-oleoylglycerol (1-monoolein)	0.4	0.0422459	0.000547368	115960	M21184.metal.pos.txt	Lipid	Monoacylglycerol	Shin	5436	HMDB11567	2369	0.123956	No	No	No
1442		1-oleoylglycerol (1-monoolein)	1-oleoylglycerol (1-monoolein)	0.5	0.0340202	0.000612335	135391	M21184.metal.pos.txt	Lipid	Monoacylglycerol	Shin	5436	HMDB11567	2148	0.11009	No	No	No
1443	M32315	serine	Ser	0.001	0.453078	1.89112e-06	856	M32315.metal.pos.txt	Amino acid	Glycine, Serine and Threonine Metabolism	Shin	7349	HMDB0000187	6602	0.477029	No	No	No
1444		serine	Ser	0.05	0.480951	3.10484e-07	22463	M32315.metal.pos.txt	Amino acid	Glycine, Serine and Threonine Metabolism	Shin	7349	HMDB0000187	6820	0.490189	No	No	No
1445		serine	Ser	0.1	0.273196	4.9505e-05	39527	M32315.metal.pos.txt	Amino acid	Glycine, Serine and Threonine Metabolism	Shin	7349	HMDB0000187	5074	0.374258	No	No	No
1446		serine	Ser	0.2	0.372204	1.44631e-05	68517	M32315.metal.pos.txt	Amino acid	Glycine, Serine and Threonine Metabolism	Shin	7349	HMDB0000187	5955	0.434457	No	No	No
1447		serine	Ser	0.3	0.284271	4.42403e-05	93693	M32315.metal.pos.txt	Amino acid	Glycine, Serine and Threonine Metabolism	Shin	7349	HMDB0000187	5185	0.381093	No	No	No
1448		serine	Ser	0.4	0.216349	8.37593e-05	115944	M32315.metal.pos.txt	Amino acid	Glycine, Serine and Threonine Metabolism	Shin	7349	HMDB0000187	4566	0.329356	No	No	No
1449		serine	Ser	0.5	0.275169	4.85379e-05	135379	M32315.metal.pos.txt	Amino acid	Glycine, Serine and Threonine Metabolism	Shin	7349	HMDB0000187	5095	0.375407	No	No	No
1450	IL7	Interleukin-7	IL-7	0.001	0.449066	4.80774e-06	2000	IL7	Cytokine	#N/A	Ahola-Olli	3409	#N/A	6562	0.475687	No	No	No
1451		Interleukin-7	IL-7	0.05	0.0550976	0.000748157	59016	IL7	Cytokine	#N/A	Ahola-Olli	3409	#N/A	2628	0.145732	No	No	No
1452		Interleukin-7	IL-7	0.1	0.116549	0.000417	106020	IL7	Cytokine	#N/A	Ahola-Olli	3409	#N/A	3494	0.231865	No	No	No
1453		Interleukin-7	IL-7	0.2	0.0862559	0.000545753	189222	IL7	Cytokine	#N/A	Ahola-Olli	3409	#N/A	3113	0.1926	No	No	No
1454		Interleukin-7	IL-7	0.3	0.0879433	0.000537269	261762	IL7	Cytokine	#N/A	Ahola-Olli	3409	#N/A	3129	0.195364	No	No	No
1455		Interleukin-7	IL-7	0.4	0.151197	0.000311952	326850	IL7	Cytokine	#N/A	Ahola-Olli	3409	#N/A	3918	0.268241	No	No	No
1456		Interleukin-7	IL-7	0.5	0.12346	0.000393189	384819	IL7	Cytokine	#N/A	Ahola-Olli	3409	#N/A	3581	0.239646	No	No	No
1457	Summary_statistics_MAGNETIC_Urea.txt_TS_Oct2018.so_RAW.txt	urea	urea	0.001	0.120273	7.32081e-05	2240	Summary_statistics_MAGNETIC_Urea.txt	Amino acid	Urea cycle; Arginine and Proline Metabolism	Kettunen	18814	HMDB0000294	3541	0.236097	No	No	No
1458		urea	urea	0.05	0.125992	6.9747e-05	68605	Summary_statistics_MAGNETIC_Urea.txt	Amino acid	Urea cycle; Arginine and Proline Metabolism	Kettunen	18814	HMDB0000294	3616	0.242194	No	No	No
1459		urea	urea	0.1	0.415398	2.42687e-06	124275	Summary_statistics_MAGNETIC_Urea.txt	Amino acid	Urea cycle; Arginine and Proline Metabolism	Kettunen	18814	HMDB0000294	6294	0.45876	No	No	No
1460		urea	urea	0.2	0.353198	7.54246e-06	223326	Summary_statistics_MAGNETIC_Urea.txt	Amino acid	Urea cycle; Arginine and Proline Metabolism	Kettunen	18814	HMDB0000294	5798	0.423435	No	No	No
1461		urea	urea	0.3	0.185548	4.25201e-05	310832	Summary_statistics_MAGNETIC_Urea.txt	Amino acid	Urea cycle; Arginine and Proline Metabolism	Kettunen	18814	HMDB0000294	4271	0.301977	No	No	No
1462		urea	urea	0.4	0.320345	1.15786e-05	389968	Summary_statistics_MAGNETIC_Urea.txt	Amino acid	Urea cycle; Arginine and Proline Metabolism	Kettunen	18814	HMDB0000294	5494	0.4053	No	No	No
1463		urea	urea	0.5	0.249849	2.42145e-05	460780	Summary_statistics_MAGNETIC_Urea.txt	Amino acid	Urea cycle; Arginine and Proline Metabolism	Kettunen	18814	HMDB0000294	4869	0.356686	No	No	No
1464	M32691	X-11374	X-11374	0.001	0.206646	0.000259894	856	M32691.metal.pos.txt	Unknown	Unknown	Shin	2575	#N/A	4475	0.320982	No	No	No
1465		X-11374	X-11374	0.05	0.0652775	0.000887331	22463	M32691.metal.pos.txt	Unknown	Unknown	Shin	2575	#N/A	2809	0.161532	No	No	No
1466		X-11374	X-11374	0.1	0.1083	0.000592737	39525	M32691.metal.pos.txt	Unknown	Unknown	Shin	2575	#N/A	3383	0.222523	No	No	No
1467		X-11374	X-11374	0.2	0.00482467	0.00259798	68521	M32691.metal.pos.txt	Unknown	Unknown	Shin	2575	#N/A	1117	0.0300236	Yes	No	No
1468		X-11374	X-11374	0.3	0.0206463	0.00161577	93687	M32691.metal.pos.txt	Unknown	Unknown	Shin	2575	#N/A	1799	0.0797733	No	No	No
1469		X-11374	X-11374	0.4	0.0337304	0.0012977	115936	M32691.metal.pos.txt	Unknown	Unknown	Shin	2575	#N/A	2137	0.109715	No	No	No
1470		X-11374	X-11374	0.5	0.0216998	0.00158312	135365	M32691.metal.pos.txt	Unknown	Unknown	Shin	2575	#N/A	1830	0.0824235	No	No	No
1471	M02730	gamma-glutamylglutamine	gamma-glutamylglutamine	0.001	0.420771	5.53126e-06	856	M02730.metal.pos.txt	Peptide	Gamma-glutamyl Amino Acid	Shin	7226	HMDB0011738	6341	0.461248	No	No	No
1472		gamma-glutamylglutamine	gamma-glutamylglutamine	0.05	0.0550634	0.000353162	22463	M02730.metal.pos.txt	Peptide	Gamma-glutamyl Amino Acid	Shin	7226	HMDB0011738	2627	0.145697	No	No	No
1473		gamma-glutamylglutamine	gamma-glutamylglutamine	0.1	0.329332	2.70063e-05	39526	M02730.metal.pos.txt	Peptide	Gamma-glutamyl Amino Acid	Shin	7226	HMDB0011738	5575	0.410616	No	No	No
1474		gamma-glutamylglutamine	gamma-glutamylglutamine	0.2	0.472794	6.44605e-07	68520	M02730.metal.pos.txt	Peptide	Gamma-glutamyl Amino Acid	Shin	7226	HMDB0011738	6754	0.486584	No	No	No
1475		gamma-glutamylglutamine	gamma-glutamylglutamine	0.3	0.495265	1.94956e-08	93695	M02730.metal.pos.txt	Peptide	Gamma-glutamyl Amino Acid	Shin	7226	HMDB0011738	6916	0.497771	No	No	No
1476		gamma-glutamylglutamine	gamma-glutamylglutamine	0.4	0.402221	8.48424e-06	115946	M02730.metal.pos.txt	Peptide	Gamma-glutamyl Amino Acid	Shin	7226	HMDB0011738	6188	0.451816	No	No	No
1477		gamma-glutamylglutamine	gamma-glutamylglutamine	0.5	0.389146	1.09698e-05	135382	M02730.metal.pos.txt	Peptide	Gamma-glutamyl Amino Acid	Shin	7226	HMDB0011738	6071	0.445553	No	No	No
1478	MetaAnalysis_C7.DC_HetISqLt75_HetDfGt0_HWEPValGt1EMinus6.tsv.fixed_TS_Oct2018.so_RAW.txt	pimelylcarnitine	C7-DC	0.001	0.378943	1.65083e-05	936	MetaAnalysis_C7.DC_HetISqLt75_HetDfGt0_HWEPValGt1EMinus6.tsv.fixed	Lipid	Fatty Acid Metabolism(Acyl Carnitine)	Draaisma	5756	HMDB0013328	5996	0.439299	No	No	No
1479		pimelylcarnitine	C7-DC	0.05	0.0641702	0.000401668	24825	MetaAnalysis_C7.DC_HetISqLt75_HetDfGt0_HWEPValGt1EMinus6.tsv.fixed	Lipid	Fatty Acid Metabolism(Acyl Carnitine)	Draaisma	5756	HMDB0013328	2793	0.159702	No	No	No
1480		pimelylcarnitine	C7-DC	0.1	0.169255	0.000159137	43767	MetaAnalysis_C7.DC_HetISqLt75_HetDfGt0_HWEPValGt1EMinus6.tsv.fixed	Lipid	Fatty Acid Metabolism(Acyl Carnitine)	Draaisma	5756	HMDB0013328	4111	0.286181	No	No	No
1481		pimelylcarnitine	C7-DC	0.2	0.408625	9.27723e-06	76456	MetaAnalysis_C7.DC_HetISqLt75_HetDfGt0_HWEPValGt1EMinus6.tsv.fixed	Lipid	Fatty Acid Metabolism(Acyl Carnitine)	Draaisma	5756	HMDB0013328	6230	0.455915	No	No	No
1482		pimelylcarnitine	C7-DC	0.3	0.316745	3.94984e-05	104866	MetaAnalysis_C7.DC_HetISqLt75_HetDfGt0_HWEPValGt1EMinus6.tsv.fixed	Lipid	Fatty Acid Metabolism(Acyl Carnitine)	Draaisma	5756	HMDB0013328	5465	0.402872	No	No	No
1483		pimelylcarnitine	C7-DC	0.4	0.263654	6.94166e-05	130088	MetaAnalysis_C7.DC_HetISqLt75_HetDfGt0_HWEPValGt1EMinus6.tsv.fixed	Lipid	Fatty Acid Metabolism(Acyl Carnitine)	Draaisma	5756	HMDB0013328	4987	0.367487	No	No	No
1484		pimelylcarnitine	C7-DC	0.5	0.303534	4.59452e-05	152316	MetaAnalysis_C7.DC_HetISqLt75_HetDfGt0_HWEPValGt1EMinus6.tsv.fixed	Lipid	Fatty Acid Metabolism(Acyl Carnitine)	Draaisma	5756	HMDB0013328	5352	0.39422	No	No	No
1485	normres_TAG52_5_imputed_complete_CHARGE.csv_TS_Oct2018.so_RAW.txt	TAG 52:5	TAG 52:5	0.001	0.186582	0.000441249	942	normres_TAG52_5_imputed_complete_CHARGE.csv	Lipid	Triacylglycerol	Rhee	1797	#N/A	4283	0.302809	No	No	No
1486		TAG 52:5	TAG 52:5	0.05	0.315055	0.000129046	25643	normres_TAG52_5_imputed_complete_CHARGE.csv	Lipid	Triacylglycerol	Rhee	1797	#N/A	5439	0.402638	No	No	No
1487		TAG 52:5	TAG 52:5	0.1	0.372583	5.87836e-05	45471	normres_TAG52_5_imputed_complete_CHARGE.csv	Lipid	Triacylglycerol	Rhee	1797	#N/A	5960	0.434535	No	No	No
1488		TAG 52:5	TAG 52:5	0.2	0.151819	0.000588666	79790	normres_TAG52_5_imputed_complete_CHARGE.csv	Lipid	Triacylglycerol	Rhee	1797	#N/A	3923	0.269003	No	No	No
1489		TAG 52:5	TAG 52:5	0.3	0.0690314	0.00122319	109794	normres_TAG52_5_imputed_complete_CHARGE.csv	Lipid	Triacylglycerol	Rhee	1797	#N/A	2860	0.167775	No	No	No
1490		TAG 52:5	TAG 52:5	0.4	0.113486	0.000811988	136596	normres_TAG52_5_imputed_complete_CHARGE.csv	Lipid	Triacylglycerol	Rhee	1797	#N/A	3453	0.228451	No	No	No
1491		TAG 52:5	TAG 52:5	0.5	0.118403	0.0007785	160355	normres_TAG52_5_imputed_complete_CHARGE.csv	Lipid	Triacylglycerol	Rhee	1797	#N/A	3521	0.233746	No	No	No
1492	normres_TAG56_2_imputed_complete_CHARGE.csv_TS_Oct2018.so_RAW.txt	TAG 56:2	TAG 56:2	0.001	0.423738	2.4116e-05	942	normres_TAG56_2_imputed_complete_CHARGE.csv	Lipid	Triacylglycerol	Rhee	1534	#N/A	6368	0.462532	No	No	No
1493		TAG 56:2	TAG 56:2	0.05	0.339556	0.00011155	25643	normres_TAG56_2_imputed_complete_CHARGE.csv	Lipid	Triacylglycerol	Rhee	1534	#N/A	5676	0.415831	No	No	No
1494		TAG 56:2	TAG 56:2	0.1	0.273022	0.000237554	45471	normres_TAG56_2_imputed_complete_CHARGE.csv	Lipid	Triacylglycerol	Rhee	1534	#N/A	5072	0.374168	No	No	No
1495		TAG 56:2	TAG 56:2	0.2	0.38522	5.55049e-05	79789	normres_TAG56_2_imputed_complete_CHARGE.csv	Lipid	Triacylglycerol	Rhee	1534	#N/A	6045	0.442955	No	No	No
1496		TAG 56:2	TAG 56:2	0.3	0.407512	3.56787e-05	109793	normres_TAG56_2_imputed_complete_CHARGE.csv	Lipid	Triacylglycerol	Rhee	1534	#N/A	6221	0.455332	No	No	No
1497		TAG 56:2	TAG 56:2	0.4	0.182332	0.000535557	136594	normres_TAG56_2_imputed_complete_CHARGE.csv	Lipid	Triacylglycerol	Rhee	1534	#N/A	4245	0.298561	No	No	No
1498		TAG 56:2	TAG 56:2	0.5	0.136516	0.000782906	160353	normres_TAG56_2_imputed_complete_CHARGE.csv	Lipid	Triacylglycerol	Rhee	1534	#N/A	3754	0.252777	No	No	No
1499	Summary_statistics_MAGNETIC_XS.VLDL.PL.txt_TS_Oct2018.so_RAW.txt	phospholipids,in,very,small,vldl	XS.VLDL.PL	0.001	0.0786878	0.000103729	2242	Summary_statistics_MAGNETIC_XS.VLDL.PL.txt	Lipid	Lipid ratios	Kettunen	19273	#N/A	2994	0.182685	No	No	No
1500		phospholipids,in,very,small,vldl	XS.VLDL.PL	0.05	0.00617339	0.000324774	68615	Summary_statistics_MAGNETIC_XS.VLDL.PL.txt	Lipid	Lipid ratios	Kettunen	19273	#N/A	1202	0.0356998	Yes	No	No
1501		phospholipids,in,very,small,vldl	XS.VLDL.PL	0.1	1.08446e-05	0.000935322	124282	Summary_statistics_MAGNETIC_XS.VLDL.PL.txt	Lipid	Lipid ratios	Kettunen	19273	#N/A	121	0.000622982	Yes	Yes	No
1502		phospholipids,in,very,small,vldl	XS.VLDL.PL	0.2	5.23798e-06	0.00100725	223355	Summary_statistics_MAGNETIC_XS.VLDL.PL.txt	Lipid	Lipid ratios	Kettunen	19273	#N/A	86	0.000423363	Yes	Yes	Yes
1503		phospholipids,in,very,small,vldl	XS.VLDL.PL	0.3	9.29031e-06	0.000950594	310864	Summary_statistics_MAGNETIC_XS.VLDL.PL.txt	Lipid	Lipid ratios	Kettunen	19273	#N/A	112	0.00057658	Yes	Yes	No
1504		phospholipids,in,very,small,vldl	XS.VLDL.PL	0.4	3.37418e-06	0.00105083	390017	Summary_statistics_MAGNETIC_XS.VLDL.PL.txt	Lipid	Lipid ratios	Kettunen	19273	#N/A	68	0.000344911	Yes	Yes	Yes
1505		phospholipids,in,very,small,vldl	XS.VLDL.PL	0.5	7.38628e-06	0.000973255	460828	Summary_statistics_MAGNETIC_XS.VLDL.PL.txt	Lipid	Lipid ratios	Kettunen	19273	#N/A	103	0.000498466	Yes	Yes	No
1506	M32557	X-06126	X-06126	0.001	0.0608473	0.000326425	856	M32557.metal.pos.txt	Unknown	Unknown	Shin	7337	#N/A	2733	0.154757	No	No	No
1507		X-06126	X-06126	0.05	0.0116398	0.000701338	22463	M32557.metal.pos.txt	Unknown	Unknown	Shin	7337	#N/A	1486	0.0544469	No	No	No
1508		X-06126	X-06126	0.1	0.00650606	0.000840244	39524	M32557.metal.pos.txt	Unknown	Unknown	Shin	7337	#N/A	1220	0.0370685	Yes	No	No
1509		X-06126	X-06126	0.2	0.00440806	0.000934509	68517	M32557.metal.pos.txt	Unknown	Unknown	Shin	7337	#N/A	1081	0.0283446	Yes	No	No
1510		X-06126	X-06126	0.3	0.00172776	0.00116463	93692	M32557.metal.pos.txt	Unknown	Unknown	Shin	7337	#N/A	796	0.0150875	Yes	No	No
1511		X-06126	X-06126	0.4	0.00160558	0.00118281	115943	M32557.metal.pos.txt	Unknown	Unknown	Shin	7337	#N/A	777	0.0143634	Yes	No	No
1512		X-06126	X-06126	0.5	0.00236265	0.00108728	135372	M32557.metal.pos.txt	Unknown	Unknown	Shin	7337	#N/A	892	0.0184112	Yes	No	No
1513	M32869	X-11552	X-11552	0.001	0.0147267	0.00220469	857	M32869.metal.pos.txt	Unknown	Unknown	Shin	2148	#N/A	1595	0.064179	No	No	No
1514		X-11552	X-11552	0.05	0.263471	0.000186335	22459	M32869.metal.pos.txt	Unknown	Unknown	Shin	2148	#N/A	4984	0.367453	No	No	No
1515		X-11552	X-11552	0.1	0.126724	0.000606986	39517	M32869.metal.pos.txt	Unknown	Unknown	Shin	2148	#N/A	3630	0.24266	No	No	No
1516		X-11552	X-11552	0.2	0.168159	0.00043027	68509	M32869.metal.pos.txt	Unknown	Unknown	Shin	2148	#N/A	4099	0.28516	No	No	No
1517		X-11552	X-11552	0.3	0.150918	0.000496184	93676	M32869.metal.pos.txt	Unknown	Unknown	Shin	2148	#N/A	3917	0.267814	No	No	No
1518		X-11552	X-11552	0.4	0.192073	0.000352542	115931	M32869.metal.pos.txt	Unknown	Unknown	Shin	2148	#N/A	4334	0.308052	No	No	No
1519		X-11552	X-11552	0.5	0.289478	0.000143344	135356	M32869.metal.pos.txt	Unknown	Unknown	Shin	2148	#N/A	5230	0.384735	No	No	No
1520	M33188	X-11843	X-11843	0.001	0.151745	0.00028306	855	M33188.metal.pos.txt	Unknown	Unknown	Shin	3740	#N/A	3922	0.268939	No	No	No
1521		X-11843	X-11843	0.05	0.0260414	0.00100834	22447	M33188.metal.pos.txt	Unknown	Unknown	Shin	3740	#N/A	1956	0.0925428	No	No	No
1522		X-11843	X-11843	0.1	0.00255531	0.00209403	39513	M33188.metal.pos.txt	Unknown	Unknown	Shin	3740	#N/A	917	0.0193697	Yes	No	No
1523		X-11843	X-11843	0.2	0.00582017	0.00170038	68491	M33188.metal.pos.txt	Unknown	Unknown	Shin	3740	#N/A	1179	0.0343138	Yes	No	No
1524		X-11843	X-11843	0.3	0.0160937	0.00122612	93669	M33188.metal.pos.txt	Unknown	Unknown	Shin	3740	#N/A	1634	0.0684621	No	No	No
1525		X-11843	X-11843	0.4	0.0309772	0.000931191	115918	M33188.metal.pos.txt	Unknown	Unknown	Shin	3740	#N/A	2071	0.10397	No	No	No
1526		X-11843	X-11843	0.5	0.0522038	0.000704803	135357	M33188.metal.pos.txt	Unknown	Unknown	Shin	3740	#N/A	2573	0.141029	No	No	No
1527	M33228	1-arachidonoylglycerophosphocholine*	lysopc c20:0	0.001	0.429079	4.52227e-06	856	M33228.metal.pos.txt	Lipid	Glycerophospholipids	Shin	7063	HMDB0010395	6418	0.464713	No	No	No
1528		1-arachidonoylglycerophosphocholine*	lysopc c20:0	0.05	4.89315e-05	0.00214657	22462	M33228.metal.pos.txt	Lipid	Glycerophospholipids	Shin	7063	HMDB0010395	228	0.00149177	Yes	Yes	No
1529		1-arachidonoylglycerophosphocholine*	lysopc c20:0	0.1	1.4318e-05	0.00247552	39528	M33228.metal.pos.txt	Lipid	Glycerophospholipids	Shin	7063	HMDB0010395	139	0.000716003	Yes	Yes	No
1530		1-arachidonoylglycerophosphocholine*	lysopc c20:0	0.2	5.19167e-05	0.00213077	68518	M33228.metal.pos.txt	Lipid	Glycerophospholipids	Shin	7063	HMDB0010395	231	0.00156222	Yes	Yes	No
1531		1-arachidonoylglycerophosphocholine*	lysopc c20:0	0.3	6.35306e-06	0.00269411	93688	M33228.metal.pos.txt	Lipid	Glycerophospholipids	Shin	7063	HMDB0010395	95	0.000464843	Yes	Yes	Yes
1532		1-arachidonoylglycerophosphocholine*	lysopc c20:0	0.4	1.12168e-05	0.0025411	115944	M33228.metal.pos.txt	Lipid	Glycerophospholipids	Shin	7063	HMDB0010395	124	0.000628774	Yes	Yes	No
1533		1-arachidonoylglycerophosphocholine*	lysopc c20:0	0.5	8.63938e-06	0.00261133	135368	M33228.metal.pos.txt	Lipid	Glycerophospholipids	Shin	7063	HMDB0010395	108	0.00055604	Yes	Yes	No
1534	normres_sum_isoleu_phe_tyr_imputed_complete_CHARGE.csv_TS_Oct2018.so_RAW.txt	sum_isoleu_phe_tyr	sum_isoleu_phe_tyr	0.001	0.312027	0.000133293	942	normres_sum_isoleu_phe_tyr_imputed_complete_CHARGE.csv	Amino acid	Ratios	Rhee	1802	#N/A	5412	0.400758	No	No	No
1535		sum_isoleu_phe_tyr	sum_isoleu_phe_tyr	0.05	0.233731	0.000292948	25643	normres_sum_isoleu_phe_tyr_imputed_complete_CHARGE.csv	Amino acid	Ratios	Rhee	1802	#N/A	4735	0.343118	No	No	No
1536		sum_isoleu_phe_tyr	sum_isoleu_phe_tyr	0.1	0.213009	0.000351577	45471	normres_sum_isoleu_phe_tyr_imputed_complete_CHARGE.csv	Amino acid	Ratios	Rhee	1802	#N/A	4524	0.327283	No	No	No
1537		sum_isoleu_phe_tyr	sum_isoleu_phe_tyr	0.2	0.285203	0.000178677	79790	normres_sum_isoleu_phe_tyr_imputed_complete_CHARGE.csv	Amino acid	Ratios	Rhee	1802	#N/A	5192	0.381827	No	No	No
1538		sum_isoleu_phe_tyr	sum_isoleu_phe_tyr	0.3	0.131998	0.000692147	109794	normres_sum_isoleu_phe_tyr_imputed_complete_CHARGE.csv	Amino acid	Ratios	Rhee	1802	#N/A	3691	0.248583	No	No	No
1539		sum_isoleu_phe_tyr	sum_isoleu_phe_tyr	0.4	0.188076	0.000434555	136596	normres_sum_isoleu_phe_tyr_imputed_complete_CHARGE.csv	Amino acid	Ratios	Rhee	1802	#N/A	4296	0.304311	No	No	No
1540		sum_isoleu_phe_tyr	sum_isoleu_phe_tyr	0.5	0.199414	0.00039496	160355	normres_sum_isoleu_phe_tyr_imputed_complete_CHARGE.csv	Amino acid	Ratios	Rhee	1802	#N/A	4409	0.314385	No	No	No
1541	Summary_statistics_MAGNETIC_Ile.txt_TS_Oct2018.so_RAW.txt	isoleucine	Ile	0.001	0.0865529	7.49019e-05	2250	Summary_statistics_MAGNETIC_Ile.txt	Amino acid	Leucine, Isoleucine and Valine Metabolism	Kettunen	24776	HMDB0000172	3117	0.193016	No	No	No
1542		isoleucine	Ile	0.05	0.111634	5.9864e-05	68876	Summary_statistics_MAGNETIC_Ile.txt	Amino acid	Leucine, Isoleucine and Valine Metabolism	Kettunen	24776	HMDB0000172	3428	0.226363	No	No	No
1543		isoleucine	Ile	0.1	0.0379192	0.000127208	124800	Summary_statistics_MAGNETIC_Ile.txt	Amino acid	Leucine, Isoleucine and Valine Metabolism	Kettunen	24776	HMDB0000172	2262	0.116523	No	No	No
1544		isoleucine	Ile	0.2	0.183112	3.29522e-05	224377	Summary_statistics_MAGNETIC_Ile.txt	Amino acid	Leucine, Isoleucine and Valine Metabolism	Kettunen	24776	HMDB0000172	4252	0.299344	No	No	No
1545		isoleucine	Ile	0.3	0.357669	5.36822e-06	312302	Summary_statistics_MAGNETIC_Ile.txt	Amino acid	Leucine, Isoleucine and Valine Metabolism	Kettunen	24776	HMDB0000172	5826	0.426735	No	No	No
1546		isoleucine	Ile	0.4	0.344044	6.50481e-06	391820	Summary_statistics_MAGNETIC_Ile.txt	Amino acid	Leucine, Isoleucine and Valine Metabolism	Kettunen	24776	HMDB0000172	5717	0.418305	No	No	No
1547		isoleucine	Ile	0.5	0.497772	1.25849e-09	462938	Summary_statistics_MAGNETIC_Ile.txt	Amino acid	Leucine, Isoleucine and Valine Metabolism	Kettunen	24776	HMDB0000172	6932	0.499137	No	No	No
1548	M32762	X-11445--5-alpha-pregnan-3beta,20alpha-disulfate	X-11445--5-alpha-pregnan-3beta,20alpha-disulfate	0.001	0.498603	4.83345e-09	857	M32762.metal.pos.txt	Lipid	Steroid	Shin	2537	#N/A	6940	0.499393	No	No	No
1549		X-11445--5-alpha-pregnan-3beta,20alpha-disulfate	X-11445--5-alpha-pregnan-3beta,20alpha-disulfate	0.05	0.00818829	0.0022686	22464	M32762.metal.pos.txt	Lipid	Steroid	Shin	2537	#N/A	1323	0.043021	Yes	No	No
1550		X-11445--5-alpha-pregnan-3beta,20alpha-disulfate	X-11445--5-alpha-pregnan-3beta,20alpha-disulfate	0.1	0.00173019	0.00336338	39526	M32762.metal.pos.txt	Lipid	Steroid	Shin	2537	#N/A	797	0.0150898	Yes	No	No
1551		X-11445--5-alpha-pregnan-3beta,20alpha-disulfate	X-11445--5-alpha-pregnan-3beta,20alpha-disulfate	0.2	0.000564202	0.00417104	68522	M32762.metal.pos.txt	Lipid	Steroid	Shin	2537	#N/A	548	0.00715651	Yes	Yes	No
1552		X-11445--5-alpha-pregnan-3beta,20alpha-disulfate	X-11445--5-alpha-pregnan-3beta,20alpha-disulfate	0.3	2.81042e-05	0.00637545	93691	M32762.metal.pos.txt	Lipid	Steroid	Shin	2537	#N/A	182	0.00107336	Yes	Yes	No
1553		X-11445--5-alpha-pregnan-3beta,20alpha-disulfate	X-11445--5-alpha-pregnan-3beta,20alpha-disulfate	0.4	3.90937e-05	0.00613077	115946	M32762.metal.pos.txt	Lipid	Steroid	Shin	2537	#N/A	210	0.001294	Yes	Yes	No
1554		X-11445--5-alpha-pregnan-3beta,20alpha-disulfate	X-11445--5-alpha-pregnan-3beta,20alpha-disulfate	0.5	0.000239186	0.00479655	135379	M32762.metal.pos.txt	Lipid	Steroid	Shin	2537	#N/A	413	0.00402562	Yes	Yes	No
1555	normres_betaine_imputed_complete_CHARGE.csv_TS_Oct2018.so_RAW.txt	betaine	betaine	0.001	0.315707	0.000127709	942	normres_betaine_imputed_complete_CHARGE.csv	Amino acid	Glycine, Serine and Threonine Metabolism	Rhee	1802	HMDB0000043	5450	0.402657	No	No	No
1556		betaine	betaine	0.05	0.00117945	0.00511834	25643	normres_betaine_imputed_complete_CHARGE.csv	Amino acid	Glycine, Serine and Threonine Metabolism	Rhee	1802	HMDB0000043	700	0.0117119	Yes	No	No
1557		betaine	betaine	0.1	0.000127489	0.00739493	45471	normres_betaine_imputed_complete_CHARGE.csv	Amino acid	Glycine, Serine and Threonine Metabolism	Rhee	1802	HMDB0000043	342	0.00259116	Yes	Yes	No
1558		betaine	betaine	0.2	6.87546e-05	0.00803413	79790	normres_betaine_imputed_complete_CHARGE.csv	Amino acid	Glycine, Serine and Threonine Metabolism	Rhee	1802	HMDB0000043	261	0.00183109	Yes	Yes	No
1559		betaine	betaine	0.3	9.42445e-06	0.0101052	109794	normres_betaine_imputed_complete_CHARGE.csv	Amino acid	Glycine, Serine and Threonine Metabolism	Rhee	1802	HMDB0000043	114	0.000574643	Yes	Yes	No
1560		betaine	betaine	0.4	1.14762e-06	0.0123156	136596	normres_betaine_imputed_complete_CHARGE.csv	Amino acid	Glycine, Serine and Threonine Metabolism	Rhee	1802	HMDB0000043	31	0.000257326	Yes	Yes	Yes
1561		betaine	betaine	0.5	4.05261e-07	0.0134124	160355	normres_betaine_imputed_complete_CHARGE.csv	Amino acid	Glycine, Serine and Threonine Metabolism	Rhee	1802	HMDB0000043	22	0.000128044	Yes	Yes	Yes
1562	Summary_statistics_MAGNETIC_Tyr.txt_TS_Oct2018.so_RAW.txt	tyrosine	Tyr	0.001	0.381935	3.62054e-06	2250	Summary_statistics_MAGNETIC_Tyr.txt	Amino acid	Phenylalanine and Tyrosine Metabolism	Kettunen	24925	HMDB0000158	6022	0.440855	No	No	No
1563		tyrosine	Tyr	0.05	0.384923	3.43432e-06	68889	Summary_statistics_MAGNETIC_Tyr.txt	Amino acid	Phenylalanine and Tyrosine Metabolism	Kettunen	24925	HMDB0000158	6039	0.443054	No	No	No
1564		tyrosine	Tyr	0.1	0.465437	3.01899e-07	124804	Summary_statistics_MAGNETIC_Tyr.txt	Amino acid	Phenylalanine and Tyrosine Metabolism	Kettunen	24925	HMDB0000158	6701	0.482801	No	No	No
1565		tyrosine	Tyr	0.2	0.243843	1.9323e-05	224419	Summary_statistics_MAGNETIC_Tyr.txt	Amino acid	Phenylalanine and Tyrosine Metabolism	Kettunen	24925	HMDB0000158	4806	0.352674	No	No	No
1566		tyrosine	Tyr	0.3	0.118079	5.63028e-05	312393	Summary_statistics_MAGNETIC_Tyr.txt	Amino acid	Phenylalanine and Tyrosine Metabolism	Kettunen	24925	HMDB0000158	3517	0.233371	No	No	No
1567		tyrosine	Tyr	0.4	0.0268941	0.000149207	391917	Summary_statistics_MAGNETIC_Tyr.txt	Amino acid	Phenylalanine and Tyrosine Metabolism	Kettunen	24925	HMDB0000158	1969	0.0949421	No	No	No
1568		tyrosine	Tyr	0.5	0.0163166	0.000183129	463057	Summary_statistics_MAGNETIC_Tyr.txt	Amino acid	Phenylalanine and Tyrosine Metabolism	Kettunen	24925	HMDB0000158	1638	0.0692411	No	No	No
1569	M32553	phenol sulfate	phenol sulfate	0.001	0.419934	5.54671e-06	856	M32553.metal.pos.txt	Amino acid	Phenylalanine and Tyrosine Metabolism	Shin	7361	HMDB60015	6333	0.460913	No	No	No
1570		phenol sulfate	phenol sulfate	0.05	0.446863	2.42444e-06	22463	M32553.metal.pos.txt	Amino acid	Phenylalanine and Tyrosine Metabolism	Shin	7361	HMDB60015	6544	0.474656	No	No	No
1571		phenol sulfate	phenol sulfate	0.1	0.475188	5.26175e-07	39527	M32553.metal.pos.txt	Amino acid	Phenylalanine and Tyrosine Metabolism	Shin	7361	HMDB60015	6773	0.487676	No	No	No
1572		phenol sulfate	phenol sulfate	0.2	0.331347	2.58479e-05	68521	M32553.metal.pos.txt	Amino acid	Phenylalanine and Tyrosine Metabolism	Shin	7361	HMDB60015	5597	0.411504	No	No	No
1573		phenol sulfate	phenol sulfate	0.3	0.393654	9.88939e-06	93696	M32553.metal.pos.txt	Amino acid	Phenylalanine and Tyrosine Metabolism	Shin	7361	HMDB60015	6114	0.447545	No	No	No
1574		phenol sulfate	phenol sulfate	0.4	0.473848	5.84605e-07	115946	M32553.metal.pos.txt	Amino acid	Phenylalanine and Tyrosine Metabolism	Shin	7361	HMDB60015	6764	0.486949	No	No	No
1575		phenol sulfate	phenol sulfate	0.5	0.453702	1.83791e-06	135384	M32553.metal.pos.txt	Amino acid	Phenylalanine and Tyrosine Metabolism	Shin	7361	HMDB60015	6608	0.477252	No	No	No
1576	M01356	nonadecanoate (19:0)	nonadecanoate (19:0)	0.001	0.436912	3.43809e-06	856	M01356.metal.pos.txt	Lipid	Long Chain Fatty Acid	Shin	7335	HMDB0000772	6474	0.469103	No	No	No
1577		nonadecanoate (19:0)	nonadecanoate (19:0)	0.05	0.000630744	0.00141659	22463	M01356.metal.pos.txt	Lipid	Long Chain Fatty Acid	Shin	7335	HMDB0000772	570	0.00769176	Yes	Yes	No
1578		nonadecanoate (19:0)	nonadecanoate (19:0)	0.1	0.000382377	0.00154276	39526	M01356.metal.pos.txt	Lipid	Long Chain Fatty Acid	Shin	7335	HMDB0000772	490	0.00542429	Yes	Yes	No
1579		nonadecanoate (19:0)	nonadecanoate (19:0)	0.2	0.000705274	0.00138853	68518	M01356.metal.pos.txt	Lipid	Long Chain Fatty Acid	Shin	7335	HMDB0000772	596	0.00822544	Yes	Yes	No
1580		nonadecanoate (19:0)	nonadecanoate (19:0)	0.3	0.000441571	0.00150641	93689	M01356.metal.pos.txt	Lipid	Long Chain Fatty Acid	Shin	7335	HMDB0000772	512	0.00599484	Yes	Yes	No
1581		nonadecanoate (19:0)	nonadecanoate (19:0)	0.4	0.00184093	0.00114922	115938	M01356.metal.pos.txt	Lipid	Long Chain Fatty Acid	Shin	7335	HMDB0000772	815	0.015701	Yes	No	No
1582		nonadecanoate (19:0)	nonadecanoate (19:0)	0.5	0.00252384	0.00107131	135372	M01356.metal.pos.txt	Lipid	Long Chain Fatty Acid	Shin	7335	HMDB0000772	912	0.0192359	Yes	No	No
1583	MetaAnalysis_PC.ae.C34.1_HetISqLt75_HetDfGt0_HWEPValGt1EMinus6.tsv.fixed_TS_Oct2018.so_RAW.txt	phosphatidylcholine acyl-alkyl c34:1	PC ae C34:1	0.001	0.0408896	0.00040516	937	MetaAnalysis_PC.ae.C34.1_HetISqLt75_HetDfGt0_HWEPValGt1EMinus6.tsv.fixed	Lipid	Glycerophospholipids	Draaisma	7475	#N/A	2333	0.121828	No	No	No
1584		phosphatidylcholine acyl-alkyl c34:1	PC ae C34:1	0.05	0.00631089	0.000831943	24955	MetaAnalysis_PC.ae.C34.1_HetISqLt75_HetDfGt0_HWEPValGt1EMinus6.tsv.fixed	Lipid	Glycerophospholipids	Draaisma	7475	#N/A	1209	0.0362837	Yes	No	No
1585		phosphatidylcholine acyl-alkyl c34:1	PC ae C34:1	0.1	0.014904	0.000631283	44026	MetaAnalysis_PC.ae.C34.1_HetISqLt75_HetDfGt0_HWEPValGt1EMinus6.tsv.fixed	Lipid	Glycerophospholipids	Draaisma	7475	#N/A	1599	0.064789	No	No	No
1586		phosphatidylcholine acyl-alkyl c34:1	PC ae C34:1	0.2	0.0399914	0.000409983	76954	MetaAnalysis_PC.ae.C34.1_HetISqLt75_HetDfGt0_HWEPValGt1EMinus6.tsv.fixed	Lipid	Glycerophospholipids	Draaisma	7475	#N/A	2313	0.120182	No	No	No
1587		phosphatidylcholine acyl-alkyl c34:1	PC ae C34:1	0.3	0.0376461	0.000423148	105537	MetaAnalysis_PC.ae.C34.1_HetISqLt75_HetDfGt0_HWEPValGt1EMinus6.tsv.fixed	Lipid	Glycerophospholipids	Draaisma	7475	#N/A	2253	0.116147	No	No	No
1588		phosphatidylcholine acyl-alkyl c34:1	PC ae C34:1	0.4	0.027667	0.000491115	130965	MetaAnalysis_PC.ae.C34.1_HetISqLt75_HetDfGt0_HWEPValGt1EMinus6.tsv.fixed	Lipid	Glycerophospholipids	Draaisma	7475	#N/A	1990	0.09664	No	No	No
1589		phosphatidylcholine acyl-alkyl c34:1	PC ae C34:1	0.5	0.0369394	0.000427289	153371	MetaAnalysis_PC.ae.C34.1_HetISqLt75_HetDfGt0_HWEPValGt1EMinus6.tsv.fixed	Lipid	Glycerophospholipids	Draaisma	7475	#N/A	2227	0.115297	No	No	No
1590	M00584	mannose	mannose	0.001	0.330568	2.616e-05	856	M00584.metal.pos.txt	Carbohydrate	Fructose, Mannose and Galactose Metabolism	Shin	7345	HMDB0000169	5589	0.411125	No	No	No
1591		mannose	mannose	0.05	0.0175843	0.000603898	22462	M00584.metal.pos.txt	Carbohydrate	Fructose, Mannose and Galactose Metabolism	Shin	7345	HMDB0000169	1688	0.0724101	No	No	No
1592		mannose	mannose	0.1	0.0126347	0.000681229	39526	M00584.metal.pos.txt	Carbohydrate	Fructose, Mannose and Galactose Metabolism	Shin	7345	HMDB0000169	1525	0.0575892	No	No	No
1593		mannose	mannose	0.2	0.0415146	0.000408982	68521	M00584.metal.pos.txt	Carbohydrate	Fructose, Mannose and Galactose Metabolism	Shin	7345	HMDB0000169	2349	0.122847	No	No	No
1594		mannose	mannose	0.3	0.0440435	0.000395972	93694	M00584.metal.pos.txt	Carbohydrate	Fructose, Mannose and Galactose Metabolism	Shin	7345	HMDB0000169	2404	0.127349	No	No	No
1595		mannose	mannose	0.4	0.031288	0.000472014	115945	M00584.metal.pos.txt	Carbohydrate	Fructose, Mannose and Galactose Metabolism	Shin	7345	HMDB0000169	2076	0.104761	No	No	No
1596		mannose	mannose	0.5	0.0391049	0.0004222	135379	M00584.metal.pos.txt	Carbohydrate	Fructose, Mannose and Galactose Metabolism	Shin	7345	HMDB0000169	2296	0.118388	No	No	No
1597	Summary_statistics_MAGNETIC_L.LDL.FC.txt_TS_Oct2018.so_RAW.txt	free,cholesterol,in,large,ldl	L.LDL.FC	0.001	0.188215	3.62939e-05	2243	Summary_statistics_MAGNETIC_L.LDL.FC.txt	Lipid	Lipid ratios	Kettunen	21555	#N/A	4298	0.304393	No	No	No
1598		free,cholesterol,in,large,ldl	L.LDL.FC	0.05	0.0183106	0.000202621	68676	Summary_statistics_MAGNETIC_L.LDL.FC.txt	Lipid	Lipid ratios	Kettunen	21555	#N/A	1711	0.0743876	No	No	No
1599		free,cholesterol,in,large,ldl	L.LDL.FC	0.1	0.000167201	0.000596767	124391	Summary_statistics_MAGNETIC_L.LDL.FC.txt	Lipid	Lipid ratios	Kettunen	21555	#N/A	376	0.003091	Yes	Yes	No
1600		free,cholesterol,in,large,ldl	L.LDL.FC	0.2	2.79324e-05	0.000753041	223594	Summary_statistics_MAGNETIC_L.LDL.FC.txt	Lipid	Lipid ratios	Kettunen	21555	#N/A	181	0.0010727	Yes	Yes	No
1601		free,cholesterol,in,large,ldl	L.LDL.FC	0.3	0.000154778	0.000603468	311216	Summary_statistics_MAGNETIC_L.LDL.FC.txt	Lipid	Lipid ratios	Kettunen	21555	#N/A	364	0.00295566	Yes	Yes	No
1602		free,cholesterol,in,large,ldl	L.LDL.FC	0.4	8.39626e-05	0.000656697	390438	Summary_statistics_MAGNETIC_L.LDL.FC.txt	Lipid	Lipid ratios	Kettunen	21555	#N/A	287	0.00203353	Yes	Yes	No
1603		free,cholesterol,in,large,ldl	L.LDL.FC	0.5	0.000273372	0.000554199	461318	Summary_statistics_MAGNETIC_L.LDL.FC.txt	Lipid	Lipid ratios	Kettunen	21555	#N/A	439	0.00432849	Yes	Yes	No
1604	M34329	X-12719	X-12719	0.001	0.16257	0.000648688	855	M34329.metal.pos.txt	Unknown	Unknown	Shin	1492	#N/A	4031	0.280334	No	No	No
1605		X-12719	X-12719	0.05	0.0609482	0.00160246	22451	M34329.metal.pos.txt	Unknown	Unknown	Shin	1492	#N/A	2736	0.154843	No	No	No
1606		X-12719	X-12719	0.1	0.00833847	0.00383316	39513	M34329.metal.pos.txt	Unknown	Unknown	Shin	1492	#N/A	1329	0.0436123	Yes	No	No
1607		X-12719	X-12719	0.2	0.000653529	0.00690136	68490	M34329.metal.pos.txt	Unknown	Unknown	Shin	1492	#N/A	582	0.00780529	Yes	Yes	No
1608		X-12719	X-12719	0.3	0.000280363	0.0079455	93651	M34329.metal.pos.txt	Unknown	Unknown	Shin	1492	#N/A	443	0.0043991	Yes	Yes	No
1609		X-12719	X-12719	0.4	9.22337e-05	0.00932823	115870	M34329.metal.pos.txt	Unknown	Unknown	Shin	1492	#N/A	305	0.00210202	Yes	Yes	No
1610		X-12719	X-12719	0.5	0.000143057	0.00878105	135300	M34329.metal.pos.txt	Unknown	Unknown	Shin	1492	#N/A	355	0.0028011	Yes	Yes	No
1611	Summary_statistics_MAGNETIC_Gly.txt_TS_Oct2018.so_RAW.txt	glycine	Gly	0.001	0.0598042	0.000129299	2232	Summary_statistics_MAGNETIC_Gly.txt	Amino acid	Glycine, Serine and Threonine Metabolism	Kettunen	18734	HMDB0000123	2719	0.152887	No	No	No
1612		glycine	Gly	0.05	0.305321	1.38379e-05	68303	Summary_statistics_MAGNETIC_Gly.txt	Amino acid	Glycine, Serine and Threonine Metabolism	Kettunen	18734	HMDB0000123	5364	0.395654	No	No	No
1613		glycine	Gly	0.1	0.496563	3.9627e-09	123662	Summary_statistics_MAGNETIC_Gly.txt	Amino acid	Glycine, Serine and Threonine Metabolism	Kettunen	18734	HMDB0000123	6927	0.498283	No	No	No
1614		glycine	Gly	0.2	0.405429	3.05719e-06	222236	Summary_statistics_MAGNETIC_Gly.txt	Amino acid	Glycine, Serine and Threonine Metabolism	Kettunen	18734	HMDB0000123	6208	0.453953	No	No	No
1615		glycine	Gly	0.3	0.254278	2.33283e-05	309243	Summary_statistics_MAGNETIC_Gly.txt	Amino acid	Glycine, Serine and Threonine Metabolism	Kettunen	18734	HMDB0000123	4906	0.36027	No	No	No
1616		glycine	Gly	0.4	0.449474	8.60801e-07	387943	Summary_statistics_MAGNETIC_Gly.txt	Amino acid	Glycine, Serine and Threonine Metabolism	Kettunen	18734	HMDB0000123	6568	0.475685	No	No	No
1617		glycine	Gly	0.5	0.452919	7.46896e-07	458328	Summary_statistics_MAGNETIC_Gly.txt	Amino acid	Glycine, Serine and Threonine Metabolism	Kettunen	18734	HMDB0000123	6600	0.477006	No	No	No
1618	Summary_statistics_MAGNETIC_XL.HDL.L.txt_TS_Oct2018.so_RAW.txt	total,lipids,in,very,large,hdl	XL.HDL.L	0.001	0.226813	2.91376e-05	2242	Summary_statistics_MAGNETIC_XL.HDL.L.txt	Lipid	Lipid ratios	Kettunen	19273	#N/A	4664	0.338031	No	No	No
1619		total,lipids,in,very,large,hdl	XL.HDL.L	0.05	0.424981	1.85671e-06	68599	Summary_statistics_MAGNETIC_XL.HDL.L.txt	Lipid	Lipid ratios	Kettunen	19273	#N/A	6384	0.462726	No	No	No
1620		total,lipids,in,very,large,hdl	XL.HDL.L	0.1	0.450705	7.96251e-07	124242	Summary_statistics_MAGNETIC_XL.HDL.L.txt	Lipid	Lipid ratios	Kettunen	19273	#N/A	6581	0.476045	No	No	No
1621		total,lipids,in,very,large,hdl	XL.HDL.L	0.2	0.280337	1.75653e-05	223298	Summary_statistics_MAGNETIC_XL.HDL.L.txt	Lipid	Lipid ratios	Kettunen	19273	#N/A	5146	0.378667	No	No	No
1622		total,lipids,in,very,large,hdl	XL.HDL.L	0.3	0.260024	2.14702e-05	310791	Summary_statistics_MAGNETIC_XL.HDL.L.txt	Lipid	Lipid ratios	Kettunen	19273	#N/A	4961	0.364327	No	No	No
1623		total,lipids,in,very,large,hdl	XL.HDL.L	0.4	0.215154	3.22721e-05	389916	Summary_statistics_MAGNETIC_XL.HDL.L.txt	Lipid	Lipid ratios	Kettunen	19273	#N/A	4549	0.328762	No	No	No
1624		total,lipids,in,very,large,hdl	XL.HDL.L	0.5	0.259607	2.15561e-05	460698	Summary_statistics_MAGNETIC_XL.HDL.L.txt	Lipid	Lipid ratios	Kettunen	19273	#N/A	4956	0.36411	No	No	No
1625	M38178	cis-4-decenoyl carnitine	cis-4-decenoyl carnitine	0.001	0.324373	2.87411e-05	856	M38178.metal.pos.txt	Lipid	Fatty Acid Metabolism(Acyl Carnitine)	Shin	7219	HMDB0240772	5532	0.407577	No	No	No
1626		cis-4-decenoyl carnitine	cis-4-decenoyl carnitine	0.05	0.00388714	0.000980921	22464	M38178.metal.pos.txt	Lipid	Fatty Acid Metabolism(Acyl Carnitine)	Shin	7219	HMDB0240772	1046	0.0258313	Yes	No	No
1627		cis-4-decenoyl carnitine	cis-4-decenoyl carnitine	0.1	0.00180154	0.00117312	39528	M38178.metal.pos.txt	Lipid	Fatty Acid Metabolism(Acyl Carnitine)	Shin	7219	HMDB0240772	807	0.0155174	Yes	No	No
1628		cis-4-decenoyl carnitine	cis-4-decenoyl carnitine	0.2	0.00339784	0.00101433	68520	M38178.metal.pos.txt	Lipid	Fatty Acid Metabolism(Acyl Carnitine)	Shin	7219	HMDB0240772	994	0.0237609	Yes	No	No
1629		cis-4-decenoyl carnitine	cis-4-decenoyl carnitine	0.3	0.00412016	0.000966493	93696	M38178.metal.pos.txt	Lipid	Fatty Acid Metabolism(Acyl Carnitine)	Shin	7219	HMDB0240772	1063	0.0269419	Yes	No	No
1630		cis-4-decenoyl carnitine	cis-4-decenoyl carnitine	0.4	0.00515266	0.000911254	115947	M38178.metal.pos.txt	Lipid	Fatty Acid Metabolism(Acyl Carnitine)	Shin	7219	HMDB0240772	1135	0.031556	Yes	No	No
1631		cis-4-decenoyl carnitine	cis-4-decenoyl carnitine	0.5	0.00819278	0.000797717	135381	M38178.metal.pos.txt	Lipid	Fatty Acid Metabolism(Acyl Carnitine)	Shin	7219	HMDB0240772	1324	0.0430121	Yes	No	No
1632	M22138	homocitrulline	homocitrulline	0.001	0.357372	3.38184e-05	856	M22138.metal.pos.txt	Amino acid	Urea cycle; Arginine and Proline Metabolism	Shin	3950	HMDB0000679	5824	0.426527	No	No	No
1633		homocitrulline	homocitrulline	0.05	2.55259e-05	0.00414547	22456	M22138.metal.pos.txt	Amino acid	Urea cycle; Arginine and Proline Metabolism	Shin	3950	HMDB0000679	170	0.00104371	Yes	Yes	No
1634		homocitrulline	homocitrulline	0.1	7.55803e-05	0.00362826	39520	M22138.metal.pos.txt	Amino acid	Urea cycle; Arginine and Proline Metabolism	Shin	3950	HMDB0000679	273	0.00192439	Yes	Yes	No
1635		homocitrulline	homocitrulline	0.2	0.000156675	0.00328292	68508	M22138.metal.pos.txt	Amino acid	Urea cycle; Arginine and Proline Metabolism	Shin	3950	HMDB0000679	367	0.00296743	Yes	Yes	No
1636		homocitrulline	homocitrulline	0.3	1.18054e-05	0.00451467	93685	M22138.metal.pos.txt	Amino acid	Urea cycle; Arginine and Proline Metabolism	Shin	3950	HMDB0000679	126	0.000651265	Yes	Yes	No
1637		homocitrulline	homocitrulline	0.4	8.00987e-06	0.00470085	115927	M22138.metal.pos.txt	Amino acid	Urea cycle; Arginine and Proline Metabolism	Shin	3950	HMDB0000679	105	0.000530253	Yes	Yes	No
1638		homocitrulline	homocitrulline	0.5	4.41222e-06	0.00498761	135356	M22138.metal.pos.txt	Amino acid	Urea cycle; Arginine and Proline Metabolism	Shin	3950	HMDB0000679	77	0.000398303	Yes	Yes	Yes
1639	normres_SM16_0_imputed_complete_CHARGE.csv_TS_Oct2018.so_RAW.txt	SM 16:0	SM 16:0	0.001	0.0424035	0.00165155	942	normres_SM16_0_imputed_complete_CHARGE.csv	Lipid	Sphingolipid Metabolism	Rhee	1797	#N/A	2374	0.124156	No	No	No
1640		SM 16:0	SM 16:0	0.05	0.0036938	0.00398548	25643	normres_SM16_0_imputed_complete_CHARGE.csv	Lipid	Sphingolipid Metabolism	Rhee	1797	#N/A	1024	0.0250738	Yes	No	No
1641		SM 16:0	SM 16:0	0.1	0.0123294	0.00280501	45471	normres_SM16_0_imputed_complete_CHARGE.csv	Lipid	Sphingolipid Metabolism	Rhee	1797	#N/A	1515	0.0565686	No	No	No
1642		SM 16:0	SM 16:0	0.2	0.0278033	0.00203677	79790	normres_SM16_0_imputed_complete_CHARGE.csv	Lipid	Sphingolipid Metabolism	Rhee	1797	#N/A	1995	0.0968725	No	No	No
1643		SM 16:0	SM 16:0	0.3	0.0330303	0.00187819	109794	normres_SM16_0_imputed_complete_CHARGE.csv	Lipid	Sphingolipid Metabolism	Rhee	1797	#N/A	2121	0.108248	No	No	No
1644		SM 16:0	SM 16:0	0.4	0.035454	0.00181353	136596	normres_SM16_0_imputed_complete_CHARGE.csv	Lipid	Sphingolipid Metabolism	Rhee	1797	#N/A	2190	0.11253	No	No	No
1645		SM 16:0	SM 16:0	0.5	0.0228866	0.00221786	160355	normres_SM16_0_imputed_complete_CHARGE.csv	Lipid	Sphingolipid Metabolism	Rhee	1797	#N/A	1859	0.0855753	No	No	No
1646	normres_TAG52_3_imputed_complete_CHARGE.csv_TS_Oct2018.so_RAW.txt	TAG 52:3	TAG 52:3	0.001	0.392914	4.1089e-05	942	normres_TAG52_3_imputed_complete_CHARGE.csv	Lipid	Triacylglycerol	Rhee	1797	#N/A	6106	0.447289	No	No	No
1647		TAG 52:3	TAG 52:3	0.05	0.235918	0.000288035	25643	normres_TAG52_3_imputed_complete_CHARGE.csv	Lipid	Triacylglycerol	Rhee	1797	#N/A	4748	0.34538	No	No	No
1648		TAG 52:3	TAG 52:3	0.1	0.259731	0.000230893	45471	normres_TAG52_3_imputed_complete_CHARGE.csv	Lipid	Triacylglycerol	Rhee	1797	#N/A	4959	0.364063	No	No	No
1649		TAG 52:3	TAG 52:3	0.2	0.245058	0.000265001	79790	normres_TAG52_3_imputed_complete_CHARGE.csv	Lipid	Triacylglycerol	Rhee	1797	#N/A	4820	0.353402	No	No	No
1650		TAG 52:3	TAG 52:3	0.3	0.258555	0.000233503	109794	normres_TAG52_3_imputed_complete_CHARGE.csv	Lipid	Triacylglycerol	Rhee	1797	#N/A	4949	0.363147	No	No	No
1651		TAG 52:3	TAG 52:3	0.4	0.413047	2.68633e-05	136596	normres_TAG52_3_imputed_complete_CHARGE.csv	Lipid	Triacylglycerol	Rhee	1797	#N/A	6278	0.457326	No	No	No
1652		TAG 52:3	TAG 52:3	0.5	0.401408	3.46971e-05	160355	normres_TAG52_3_imputed_complete_CHARGE.csv	Lipid	Triacylglycerol	Rhee	1797	#N/A	6181	0.451414	No	No	No
1653	normres_PC32_1_imputed_complete_CHARGE.csv_TS_Oct2018.so_RAW.txt	PC 32:1	PC 32:1	0.001	0.457143	6.44687e-06	942	normres_PC32_1_imputed_complete_CHARGE.csv	Lipid	Glycerophospholipids	Rhee	1797	#N/A	6636	0.478843	No	No	No
1654		PC 32:1	PC 32:1	0.05	8.86488e-05	0.00779229	25643	normres_PC32_1_imputed_complete_CHARGE.csv	Lipid	Glycerophospholipids	Rhee	1797	#N/A	296	0.00208175	Yes	Yes	No
1655		PC 32:1	PC 32:1	0.1	4.57769e-06	0.0108918	45471	normres_PC32_1_imputed_complete_CHARGE.csv	Lipid	Glycerophospholipids	Rhee	1797	#N/A	80	0.000397744	Yes	Yes	Yes
1656		PC 32:1	PC 32:1	0.2	3.7656e-06	0.0110973	79790	normres_PC32_1_imputed_complete_CHARGE.csv	Lipid	Glycerophospholipids	Rhee	1797	#N/A	70	0.000373924	Yes	Yes	Yes
1657		PC 32:1	PC 32:1	0.3	5.23563e-06	0.0107506	109794	normres_PC32_1_imputed_complete_CHARGE.csv	Lipid	Glycerophospholipids	Rhee	1797	#N/A	85	0.000428151	Yes	Yes	Yes
1658		PC 32:1	PC 32:1	0.4	1.54875e-06	0.0120334	136596	normres_PC32_1_imputed_complete_CHARGE.csv	Lipid	Glycerophospholipids	Rhee	1797	#N/A	39	0.000276035	Yes	Yes	Yes
1659		PC 32:1	PC 32:1	0.5	2.94491e-07	0.0137872	160355	normres_PC32_1_imputed_complete_CHARGE.csv	Lipid	Glycerophospholipids	Rhee	1797	#N/A	17	0.000120412	Yes	Yes	Yes
1660	M32379	scyllo-inositol	scyllo-inositol	0.001	0.482971	2.97954e-07	856	M32379.metal.pos.txt	Lipid	Inositol Metabolism	Shin	6119	HMDB0006088	6832	0.491383	No	No	No
1661		scyllo-inositol	scyllo-inositol	0.05	0.152818	0.000171491	22460	M32379.metal.pos.txt	Lipid	Inositol Metabolism	Shin	6119	HMDB0006088	3931	0.27022	No	No	No
1662		scyllo-inositol	scyllo-inositol	0.1	0.208247	0.000107886	39524	M32379.metal.pos.txt	Lipid	Inositol Metabolism	Shin	6119	HMDB0006088	4483	0.322891	No	No	No
1663		scyllo-inositol	scyllo-inositol	0.2	0.105404	0.000255869	68514	M32379.metal.pos.txt	Lipid	Inositol Metabolism	Shin	6119	HMDB0006088	3345	0.219033	No	No	No
1664		scyllo-inositol	scyllo-inositol	0.3	0.106276	0.000253923	93686	M32379.metal.pos.txt	Lipid	Inositol Metabolism	Shin	6119	HMDB0006088	3357	0.220056	No	No	No
1665		scyllo-inositol	scyllo-inositol	0.4	0.122296	0.000221241	115935	M32379.metal.pos.txt	Lipid	Inositol Metabolism	Shin	6119	HMDB0006088	3570	0.238118	No	No	No
1666		scyllo-inositol	scyllo-inositol	0.5	0.125684	0.000214993	135372	M32379.metal.pos.txt	Lipid	Inositol Metabolism	Shin	6119	HMDB0006088	3612	0.241868	No	No	No
1667	Summary_statistics_MAGNETIC_Ala.txt_TS_Oct2018.so_RAW.txt	alanine	Ala	0.001	0.207121	2.68828e-05	2251	Summary_statistics_MAGNETIC_Ala.txt	Amino acid	Alanine and Aspartate Metabolism	Kettunen	24796	HMDB0000161	4477	0.321576	No	No	No
1668		alanine	Ala	0.05	0.111785	5.97382e-05	68893	Summary_statistics_MAGNETIC_Ala.txt	Amino acid	Alanine and Aspartate Metabolism	Kettunen	24796	HMDB0000161	3431	0.226469	No	No	No
1669		alanine	Ala	0.1	0.0584324	9.9158e-05	124821	Summary_statistics_MAGNETIC_Ala.txt	Amino acid	Alanine and Aspartate Metabolism	Kettunen	24796	HMDB0000161	2693	0.150822	No	No	No
1670		alanine	Ala	0.2	0.0934861	7.02232e-05	224423	Summary_statistics_MAGNETIC_Ala.txt	Amino acid	Alanine and Aspartate Metabolism	Kettunen	24796	HMDB0000161	3195	0.203387	No	No	No
1671		alanine	Ala	0.3	0.296466	1.15255e-05	312393	Summary_statistics_MAGNETIC_Ala.txt	Amino acid	Alanine and Aspartate Metabolism	Kettunen	24796	HMDB0000161	5292	0.389406	No	No	No
1672		alanine	Ala	0.4	0.34739	6.20905e-06	391916	Summary_statistics_MAGNETIC_Ala.txt	Amino acid	Alanine and Aspartate Metabolism	Kettunen	24796	HMDB0000161	5744	0.420387	No	No	No
1673		alanine	Ala	0.5	0.43376	1.12216e-06	463045	Summary_statistics_MAGNETIC_Ala.txt	Amino acid	Alanine and Aspartate Metabolism	Kettunen	24796	HMDB0000161	6449	0.467525	No	No	No
1674	M01769	cortisone	cortisone	0.001	0.473326	6.27416e-07	856	M01769.metal.pos.txt	Lipid	Steroid	Shin	7136	HMDB0002802	6760	0.486699	No	No	No
1675		cortisone	cortisone	0.05	0.164542	0.000133469	22461	M01769.metal.pos.txt	Lipid	Steroid	Shin	7136	HMDB0002802	4060	0.281707	No	No	No
1676		cortisone	cortisone	0.1	0.149659	0.000150946	39528	M01769.metal.pos.txt	Lipid	Steroid	Shin	7136	HMDB0002802	3902	0.266601	No	No	No
1677		cortisone	cortisone	0.2	0.085659	0.000262209	68524	M01769.metal.pos.txt	Lipid	Steroid	Shin	7136	HMDB0002802	3104	0.191822	No	No	No
1678		cortisone	cortisone	0.3	0.248294	6.47711e-05	93697	M01769.metal.pos.txt	Lipid	Steroid	Shin	7136	HMDB0002802	4850	0.355854	No	No	No
1679		cortisone	cortisone	0.4	0.332768	2.61862e-05	115947	M01769.metal.pos.txt	Lipid	Steroid	Shin	7136	HMDB0002802	5615	0.411945	No	No	No
1680		cortisone	cortisone	0.5	0.336271	2.50336e-05	135378	M01769.metal.pos.txt	Lipid	Steroid	Shin	7136	HMDB0002802	5652	0.413557	No	No	No
1681	M32836	HWESASXX*	HWESASXX*	0.001	0.421197	5.44927e-06	856	M32836.metal.pos.txt	Peptide	Polypeptide	Shin	7255	#N/A	6346	0.461352	No	No	No
1682		HWESASXX*	HWESASXX*	0.05	0.0490863	0.000376908	22462	M32836.metal.pos.txt	Peptide	Polypeptide	Shin	7255	#N/A	2511	0.135882	No	No	No
1683		HWESASXX*	HWESASXX*	0.1	0.0168019	0.000622101	39522	M32836.metal.pos.txt	Peptide	Polypeptide	Shin	7255	#N/A	1659	0.070398	No	No	No
1684		HWESASXX*	HWESASXX*	0.2	0.0197578	0.000584055	68519	M32836.metal.pos.txt	Peptide	Polypeptide	Shin	7255	#N/A	1757	0.0781655	No	No	No
1685		HWESASXX*	HWESASXX*	0.3	0.0564928	0.000346178	93693	M32836.metal.pos.txt	Peptide	Polypeptide	Shin	7255	#N/A	2652	0.14807	No	No	No
1686		HWESASXX*	HWESASXX*	0.4	0.027525	0.000507186	115943	M32836.metal.pos.txt	Peptide	Polypeptide	Shin	7255	#N/A	1988	0.0962406	No	No	No
1687		HWESASXX*	HWESASXX*	0.5	0.0257152	0.000522841	135378	M32836.metal.pos.txt	Peptide	Polypeptide	Shin	7255	#N/A	1951	0.0916178	No	No	No
1688	M33883	X-12441--12-hydroxyeicosatetraenoate (12-HETE)	12-HETE	0.001	0.171449	0.000330063	856	M33883.metal.pos.txt	Lipid	Eicosanoid	Shin	2725	HMDB06111	4130	0.288557	No	No	No
1689		X-12441--12-hydroxyeicosatetraenoate (12-HETE)	12-HETE	0.05	0.318007	8.21959e-05	22465	M33883.metal.pos.txt	Lipid	Eicosanoid	Shin	2725	HMDB06111	5477	0.403591	No	No	No
1690		X-12441--12-hydroxyeicosatetraenoate (12-HETE)	12-HETE	0.1	0.414063	1.7297e-05	39530	M33883.metal.pos.txt	Lipid	Eicosanoid	Shin	2725	HMDB06111	6287	0.457794	No	No	No
1691		X-12441--12-hydroxyeicosatetraenoate (12-HETE)	12-HETE	0.2	0.403269	2.20082e-05	68523	M33883.metal.pos.txt	Lipid	Eicosanoid	Shin	2725	HMDB06111	6198	0.452263	No	No	No
1692		X-12441--12-hydroxyeicosatetraenoate (12-HETE)	12-HETE	0.3	0.435761	9.59817e-06	93701	M33883.metal.pos.txt	Lipid	Eicosanoid	Shin	2725	HMDB06111	6463	0.468664	No	No	No
1693		X-12441--12-hydroxyeicosatetraenoate (12-HETE)	12-HETE	0.4	0.47108	1.93184e-06	115951	M33883.metal.pos.txt	Lipid	Eicosanoid	Shin	2725	HMDB06111	6741	0.485755	No	No	No
1694		X-12441--12-hydroxyeicosatetraenoate (12-HETE)	12-HETE	0.5	0.446338	6.68001e-06	135389	M33883.metal.pos.txt	Lipid	Eicosanoid	Shin	2725	HMDB06111	6541	0.474315	No	No	No
1695	IL2ra	Interleukin-2 receptor, alpha subunit	IL2ra	0.001	0.395437	1.91236e-05	2002	IL2ra	Cytokine	#N/A	Ahola-Olli	3677	#N/A	6135	0.448033	No	No	No
1696		Interleukin-2 receptor, alpha subunit	IL2ra	0.05	0.481073	6.12566e-07	58919	IL2ra	Cytokine	#N/A	Ahola-Olli	3677	#N/A	6821	0.490242	No	No	No
1697		Interleukin-2 receptor, alpha subunit	IL2ra	0.1	0.102502	0.000436773	105857	IL2ra	Cytokine	#N/A	Ahola-Olli	3677	#N/A	3314	0.214994	No	No	No
1698		Interleukin-2 receptor, alpha subunit	IL2ra	0.2	0.0668458	0.000611482	188718	IL2ra	Cytokine	#N/A	Ahola-Olli	3677	#N/A	2827	0.16436	No	No	No
1699		Interleukin-2 receptor, alpha subunit	IL2ra	0.3	0.067266	0.000608847	261003	IL2ra	Cytokine	#N/A	Ahola-Olli	3677	#N/A	2833	0.165043	No	No	No
1700		Interleukin-2 receptor, alpha subunit	IL2ra	0.4	0.0819972	0.00052665	325856	IL2ra	Cytokine	#N/A	Ahola-Olli	3677	#N/A	3046	0.187118	No	No	No
1701		Interleukin-2 receptor, alpha subunit	IL2ra	0.5	0.086236	0.000506079	383663	IL2ra	Cytokine	#N/A	Ahola-Olli	3677	#N/A	3112	0.192618	No	No	No
1702	M32578	X-11261	X-11261	0.001	0.386228	1.14197e-05	856	M32578.metal.pos.txt	Unknown	Unknown	Shin	7322	#N/A	6049	0.443821	No	No	No
1703		X-11261	X-11261	0.05	0.343021	2.23164e-05	22465	M32578.metal.pos.txt	Unknown	Unknown	Shin	7322	#N/A	5707	0.417792	No	No	No
1704		X-11261	X-11261	0.1	0.22436	7.8375e-05	39528	M32578.metal.pos.txt	Unknown	Unknown	Shin	7322	#N/A	4634	0.33654	No	No	No
1705		X-11261	X-11261	0.2	0.395226	9.64336e-06	68519	M32578.metal.pos.txt	Unknown	Unknown	Shin	7322	#N/A	6131	0.448086	No	No	No
1706		X-11261	X-11261	0.3	0.417542	5.91928e-06	93697	M32578.metal.pos.txt	Unknown	Unknown	Shin	7322	#N/A	6313	0.45974	No	No	No
1707		X-11261	X-11261	0.4	0.460933	1.31388e-06	115945	M32578.metal.pos.txt	Unknown	Unknown	Shin	7322	#N/A	6673	0.480136	No	No	No
1708		X-11261	X-11261	0.5	0.415071	6.28496e-06	135375	M32578.metal.pos.txt	Unknown	Unknown	Shin	7322	#N/A	6292	0.458544	No	No	No
1709	normres_TAG58_11_PC1_imputed_complete_CHARGE.csv_TS_Oct2018.so_RAW.txt	TAG 58:11	TAG 58:11	0.001	0.312147	0.000133627	942	normres_TAG58_11_PC1_imputed_complete_CHARGE.csv	Lipid	Triacylglycerol	Rhee	1795	#N/A	5415	0.40069	No	No	No
1710		TAG 58:11	TAG 58:11	0.05	0.0332317	0.00187471	25643	normres_TAG58_11_PC1_imputed_complete_CHARGE.csv	Lipid	Triacylglycerol	Rhee	1795	#N/A	2126	0.108652	No	No	No
1711		TAG 58:11	TAG 58:11	0.1	0.0374742	0.00176511	45471	normres_TAG58_11_PC1_imputed_complete_CHARGE.csv	Lipid	Triacylglycerol	Rhee	1795	#N/A	2243	0.116132	No	No	No
1712		TAG 58:11	TAG 58:11	0.2	0.00292231	0.0042237	79790	normres_TAG58_11_PC1_imputed_complete_CHARGE.csv	Lipid	Triacylglycerol	Rhee	1795	#N/A	949	0.0214046	Yes	No	No
1713		TAG 58:11	TAG 58:11	0.3	0.000316378	0.00648421	109794	normres_TAG58_11_PC1_imputed_complete_CHARGE.csv	Lipid	Triacylglycerol	Rhee	1795	#N/A	461	0.00477038	Yes	Yes	No
1714		TAG 58:11	TAG 58:11	0.4	0.00208755	0.00456118	136596	normres_TAG58_11_PC1_imputed_complete_CHARGE.csv	Lipid	Triacylglycerol	Rhee	1795	#N/A	851	0.0170512	Yes	No	No
1715		TAG 58:11	TAG 58:11	0.5	0.002002	0.0046033	160355	normres_TAG58_11_PC1_imputed_complete_CHARGE.csv	Lipid	Triacylglycerol	Rhee	1795	#N/A	840	0.0165666	Yes	No	No
1716	normres_AMP_imputed_complete_CHARGE.csv_TS_Oct2018.so_RAW.txt	adenosine monophosphate	AMP	0.001	0.296759	0.000195776	942	normres_AMP_imputed_complete_CHARGE.csv	Nucleotide	Purine Metabolism, Adenine containing	Rhee	1455	HMDB00045	5294	0.389644	No	No	No
1717		adenosine monophosphate	AMP	0.05	0.0293987	0.00245127	25642	normres_AMP_imputed_complete_CHARGE.csv	Nucleotide	Purine Metabolism, Adenine containing	Rhee	1455	HMDB00045	2032	0.100566	No	No	No
1718		adenosine monophosphate	AMP	0.1	0.123762	0.00091863	45470	normres_AMP_imputed_complete_CHARGE.csv	Nucleotide	Purine Metabolism, Adenine containing	Rhee	1455	HMDB00045	3588	0.239764	No	No	No
1719		adenosine monophosphate	AMP	0.2	0.101977	0.00110854	79787	normres_AMP_imputed_complete_CHARGE.csv	Nucleotide	Purine Metabolism, Adenine containing	Rhee	1455	HMDB00045	3309	0.214217	No	No	No
1720		adenosine monophosphate	AMP	0.3	0.0518852	0.00181733	109791	normres_AMP_imputed_complete_CHARGE.csv	Nucleotide	Purine Metabolism, Adenine containing	Rhee	1455	HMDB00045	2563	0.140715	No	No	No
1721		adenosine monophosphate	AMP	0.4	0.0396593	0.00211378	136592	normres_AMP_imputed_complete_CHARGE.csv	Nucleotide	Purine Metabolism, Adenine containing	Rhee	1455	HMDB00045	2308	0.119442	No	No	No
1722		adenosine monophosphate	AMP	0.5	0.025958	0.00259352	160350	normres_AMP_imputed_complete_CHARGE.csv	Nucleotide	Purine Metabolism, Adenine containing	Rhee	1455	HMDB00045	1954	0.0923408	No	No	No
1723	M33447	palmitoleate (16:1n7)	palmitoleate (16:1n7)	0.001	0.184715	0.000109941	856	M33447.metal.pos.txt	Lipid	Long Chain Fatty Acid	Shin	7327	HMDB0003229	4264	0.301115	No	No	No
1724		palmitoleate (16:1n7)	palmitoleate (16:1n7)	0.05	0.025378	0.00052072	22465	M33447.metal.pos.txt	Lipid	Long Chain Fatty Acid	Shin	7327	HMDB0003229	1944	0.090742	No	No	No
1725		palmitoleate (16:1n7)	palmitoleate (16:1n7)	0.1	0.0376704	0.00043155	39529	M33447.metal.pos.txt	Lipid	Long Chain Fatty Acid	Shin	7327	HMDB0003229	2254	0.11617	No	No	No
1726		palmitoleate (16:1n7)	palmitoleate (16:1n7)	0.2	0.066495	0.000308025	68523	M33447.metal.pos.txt	Lipid	Long Chain Fatty Acid	Shin	7327	HMDB0003229	2822	0.163787	No	No	No
1727		palmitoleate (16:1n7)	palmitoleate (16:1n7)	0.3	0.0477019	0.000379448	93696	M33447.metal.pos.txt	Lipid	Long Chain Fatty Acid	Shin	7327	HMDB0003229	2482	0.133592	No	No	No
1728		palmitoleate (16:1n7)	palmitoleate (16:1n7)	0.4	0.146255	0.000151215	115947	M33447.metal.pos.txt	Lipid	Long Chain Fatty Acid	Shin	7327	HMDB0003229	3856	0.263646	No	No	No
1729		palmitoleate (16:1n7)	palmitoleate (16:1n7)	0.5	0.151364	0.000144952	135383	M33447.metal.pos.txt	Lipid	Long Chain Fatty Acid	Shin	7327	HMDB0003229	3919	0.268469	No	No	No
1730	normres_Ratio_SM1800_SM2400_imputed_complete_CHARGE.csv_TS_Oct2018.so_RAW.txt	ratio_sm1800_sm2400	ratio_sm1800_sm2400	0.001	0.139841	0.000650113	942	normres_Ratio_SM1800_SM2400_imputed_complete_CHARGE.csv	Lipid	Lipid ratios	Rhee	1797	#N/A	3796	0.256069	No	No	No
1731		ratio_sm1800_sm2400	ratio_sm1800_sm2400	0.05	0.0698537	0.00121305	25643	normres_Ratio_SM1800_SM2400_imputed_complete_CHARGE.csv	Lipid	Lipid ratios	Rhee	1797	#N/A	2869	0.169241	No	No	No
1732		ratio_sm1800_sm2400	ratio_sm1800_sm2400	0.1	0.0530778	0.00145167	45471	normres_Ratio_SM1800_SM2400_imputed_complete_CHARGE.csv	Lipid	Lipid ratios	Rhee	1797	#N/A	2589	0.142504	No	No	No
1733		ratio_sm1800_sm2400	ratio_sm1800_sm2400	0.2	0.0745544	0.00115756	79790	normres_Ratio_SM1800_SM2400_imputed_complete_CHARGE.csv	Lipid	Lipid ratios	Rhee	1797	#N/A	2940	0.176268	No	No	No
1734		ratio_sm1800_sm2400	ratio_sm1800_sm2400	0.3	0.0129477	0.00275801	109794	normres_Ratio_SM1800_SM2400_imputed_complete_CHARGE.csv	Lipid	Lipid ratios	Rhee	1797	#N/A	1534	0.0586699	No	No	No
1735		ratio_sm1800_sm2400	ratio_sm1800_sm2400	0.4	0.0143042	0.00266257	136596	normres_Ratio_SM1800_SM2400_imputed_complete_CHARGE.csv	Lipid	Lipid ratios	Rhee	1797	#N/A	1580	0.0629294	No	No	No
1736		ratio_sm1800_sm2400	ratio_sm1800_sm2400	0.5	0.011805	0.00284683	160355	normres_Ratio_SM1800_SM2400_imputed_complete_CHARGE.csv	Lipid	Lipid ratios	Rhee	1797	#N/A	1491	0.0550347	No	No	No
1737	MetaAnalysis_PC.ae.C32.1_HetISqLt75_HetDfGt0_HWEPValGt1EMinus6.tsv.fixed_TS_Oct2018.so_RAW.txt	phosphatidylcholine acyl-alkyl c32:1	PC ae C32:1	0.001	0.139523	0.000156719	936	MetaAnalysis_PC.ae.C32.1_HetISqLt75_HetDfGt0_HWEPValGt1EMinus6.tsv.fixed	Lipid	Glycerophospholipids	Draaisma	7476	#N/A	3792	0.255756	No	No	No
1738		phosphatidylcholine acyl-alkyl c32:1	PC ae C32:1	0.05	0.0548713	0.000342093	24949	MetaAnalysis_PC.ae.C32.1_HetISqLt75_HetDfGt0_HWEPValGt1EMinus6.tsv.fixed	Lipid	Glycerophospholipids	Draaisma	7476	#N/A	2623	0.14541	No	No	No
1739		phosphatidylcholine acyl-alkyl c32:1	PC ae C32:1	0.1	0.0242076	0.000520934	44010	MetaAnalysis_PC.ae.C32.1_HetISqLt75_HetDfGt0_HWEPValGt1EMinus6.tsv.fixed	Lipid	Glycerophospholipids	Draaisma	7476	#N/A	1905	0.0883291	No	No	No
1740		phosphatidylcholine acyl-alkyl c32:1	PC ae C32:1	0.2	0.0297981	0.000474551	76917	MetaAnalysis_PC.ae.C32.1_HetISqLt75_HetDfGt0_HWEPValGt1EMinus6.tsv.fixed	Lipid	Glycerophospholipids	Draaisma	7476	#N/A	2040	0.101533	No	No	No
1741		phosphatidylcholine acyl-alkyl c32:1	PC ae C32:1	0.3	0.0212988	0.000549782	105515	MetaAnalysis_PC.ae.C32.1_HetISqLt75_HetDfGt0_HWEPValGt1EMinus6.tsv.fixed	Lipid	Glycerophospholipids	Draaisma	7476	#N/A	1815	0.081569	No	No	No
1742		phosphatidylcholine acyl-alkyl c32:1	PC ae C32:1	0.4	0.0172188	0.000598115	130964	MetaAnalysis_PC.ae.C32.1_HetISqLt75_HetDfGt0_HWEPValGt1EMinus6.tsv.fixed	Lipid	Glycerophospholipids	Draaisma	7476	#N/A	1670	0.0716692	No	No	No
1743		phosphatidylcholine acyl-alkyl c32:1	PC ae C32:1	0.5	0.0176721	0.000592183	153380	MetaAnalysis_PC.ae.C32.1_HetISqLt75_HetDfGt0_HWEPValGt1EMinus6.tsv.fixed	Lipid	Glycerophospholipids	Draaisma	7476	#N/A	1691	0.0726425	No	No	No
1744	M34416	1-stearoylglycerophosphoethanolamine	lysope c18:0	0.001	0.00140788	0.00128697	857	M34416.metal.pos.txt	Lipid	Glycerophospholipids	Shin	6929	HMDB11130	742	0.0131889	Yes	No	No
1745		1-stearoylglycerophosphoethanolamine	lysope c18:0	0.05	1.49852e-06	0.00314391	22467	M34416.metal.pos.txt	Lipid	Glycerophospholipids	Shin	6929	HMDB11130	38	0.000274111	Yes	Yes	Yes
1746		1-stearoylglycerophosphoethanolamine	lysope c18:0	0.1	0.000379765	0.00163492	39531	M34416.metal.pos.txt	Lipid	Glycerophospholipids	Shin	6929	HMDB11130	488	0.00540932	Yes	Yes	No
1747		1-stearoylglycerophosphoethanolamine	lysope c18:0	0.2	0.000417898	0.00160933	68528	M34416.metal.pos.txt	Lipid	Glycerophospholipids	Shin	6929	HMDB11130	503	0.00577497	Yes	Yes	No
1748		1-stearoylglycerophosphoethanolamine	lysope c18:0	0.3	0.000139162	0.00190479	93700	M34416.metal.pos.txt	Lipid	Glycerophospholipids	Shin	6929	HMDB11130	354	0.00273253	Yes	Yes	No
1749		1-stearoylglycerophosphoethanolamine	lysope c18:0	0.4	0.00029573	0.00170192	115946	M34416.metal.pos.txt	Lipid	Glycerophospholipids	Shin	6929	HMDB11130	451	0.00455791	Yes	Yes	No
1750		1-stearoylglycerophosphoethanolamine	lysope c18:0	0.5	0.000288115	0.00170892	135385	M34416.metal.pos.txt	Lipid	Glycerophospholipids	Shin	6929	HMDB11130	446	0.00449033	Yes	Yes	No
1751	Summary_statistics_MAGNETIC_IDL.C.txt_TS_Oct2018.so_RAW.txt	total,cholesterol,in,idl	IDL.C	0.001	0.0811474	0.000101313	2242	Summary_statistics_MAGNETIC_IDL.C.txt	Lipid	Lipid ratios	Kettunen	19273	#N/A	3031	0.186096	No	No	No
1752		total,cholesterol,in,idl	IDL.C	0.05	0.0205506	0.000216437	68619	Summary_statistics_MAGNETIC_IDL.C.txt	Lipid	Lipid ratios	Kettunen	19273	#N/A	1796	0.0795362	No	No	No
1753		total,cholesterol,in,idl	IDL.C	0.1	0.000246644	0.000629744	124293	Summary_statistics_MAGNETIC_IDL.C.txt	Lipid	Lipid ratios	Kettunen	19273	#N/A	425	0.00403394	Yes	Yes	No
1754		total,cholesterol,in,idl	IDL.C	0.2	3.00306e-05	0.000835054	223381	Summary_statistics_MAGNETIC_IDL.C.txt	Lipid	Lipid ratios	Kettunen	19273	#N/A	188	0.00111033	Yes	Yes	No
1755		total,cholesterol,in,idl	IDL.C	0.3	5.27848e-05	0.000779771	310903	Summary_statistics_MAGNETIC_IDL.C.txt	Lipid	Lipid ratios	Kettunen	19273	#N/A	235	0.00156131	Yes	Yes	No
1756		total,cholesterol,in,idl	IDL.C	0.4	3.15019e-05	0.000830359	390060	Summary_statistics_MAGNETIC_IDL.C.txt	Lipid	Lipid ratios	Kettunen	19273	#N/A	195	0.00112292	Yes	Yes	No
1757		total,cholesterol,in,idl	IDL.C	0.5	8.14038e-05	0.000737443	460877	Summary_statistics_MAGNETIC_IDL.C.txt	Lipid	Lipid ratios	Kettunen	19273	#N/A	282	0.00200652	Yes	Yes	No
1758	M33144	X-11799	X-11799	0.001	0.312206	4.97631e-05	857	M33144.metal.pos.txt	Unknown	Unknown	Shin	4817	#N/A	5416	0.400691	No	No	No
1759		X-11799	X-11799	0.05	0.0987924	0.000344582	22466	M33144.metal.pos.txt	Unknown	Unknown	Shin	4817	#N/A	3261	0.210581	No	No	No
1760		X-11799	X-11799	0.1	0.067467	0.000463833	39520	M33144.metal.pos.txt	Unknown	Unknown	Shin	4817	#N/A	2836	0.165361	No	No	No
1761		X-11799	X-11799	0.2	0.0499318	0.00056196	68518	M33144.metal.pos.txt	Unknown	Unknown	Shin	4817	#N/A	2528	0.137293	No	No	No
1762		X-11799	X-11799	0.3	0.0547849	0.000531396	93690	M33144.metal.pos.txt	Unknown	Unknown	Shin	4817	#N/A	2621	0.145292	No	No	No
1763		X-11799	X-11799	0.4	0.0530668	0.000541865	115935	M33144.metal.pos.txt	Unknown	Unknown	Shin	4817	#N/A	2587	0.142585	No	No	No
1764		X-11799	X-11799	0.5	0.048535	0.000571362	135369	M33144.metal.pos.txt	Unknown	Unknown	Shin	4817	#N/A	2495	0.135217	No	No	No
1765	MetaAnalysis_C9_HetISqLt75_HetDfGt0_HWEPValGt1EMinus6.tsv.fixed_TS_Oct2018.so_RAW.txt	nonaylcarnitine	C9	0.001	0.310898	5.33414e-05	885	MetaAnalysis_C9_HetISqLt75_HetDfGt0_HWEPValGt1EMinus6.tsv.fixed	Lipid	Fatty Acid Metabolism(Acyl Carnitine)	Draaisma	4562	HMDB0013288	5406	0.399751	No	No	No
1766		nonaylcarnitine	C9	0.05	0.091366	0.000389066	23398	MetaAnalysis_C9_HetISqLt75_HetDfGt0_HWEPValGt1EMinus6.tsv.fixed	Lipid	Fatty Acid Metabolism(Acyl Carnitine)	Draaisma	4562	HMDB0013288	3178	0.199838	No	No	No
1767		nonaylcarnitine	C9	0.1	0.309217	5.43769e-05	41116	MetaAnalysis_C9_HetISqLt75_HetDfGt0_HWEPValGt1EMinus6.tsv.fixed	Lipid	Fatty Acid Metabolism(Acyl Carnitine)	Draaisma	4562	HMDB0013288	5398	0.398179	No	No	No
1768		nonaylcarnitine	C9	0.2	0.335367	3.96187e-05	71540	MetaAnalysis_C9_HetISqLt75_HetDfGt0_HWEPValGt1EMinus6.tsv.fixed	Lipid	Fatty Acid Metabolism(Acyl Carnitine)	Draaisma	4562	HMDB0013288	5644	0.413029	No	No	No
1769		nonaylcarnitine	C9	0.3	0.186821	0.000173487	98057	MetaAnalysis_C9_HetISqLt75_HetDfGt0_HWEPValGt1EMinus6.tsv.fixed	Lipid	Fatty Acid Metabolism(Acyl Carnitine)	Draaisma	4562	HMDB0013288	4286	0.302985	No	No	No
1770		nonaylcarnitine	C9	0.4	0.219924	0.000130784	121404	MetaAnalysis_C9_HetISqLt75_HetDfGt0_HWEPValGt1EMinus6.tsv.fixed	Lipid	Fatty Acid Metabolism(Acyl Carnitine)	Draaisma	4562	HMDB0013288	4594	0.332759	No	No	No
1771		nonaylcarnitine	C9	0.5	0.318551	4.87829e-05	141992	MetaAnalysis_C9_HetISqLt75_HetDfGt0_HWEPValGt1EMinus6.tsv.fixed	Lipid	Fatty Acid Metabolism(Acyl Carnitine)	Draaisma	4562	HMDB0013288	5483	0.403838	No	No	No
1772	M33801	ADpSGEGDFXAEGGGVR*	ADpSGEGDFXAEGGGVR*	0.001	0.409609	1.35853e-05	856	M33801.metal.pos.txt	Peptide	Fibrinogen cleavage peptide	Shin	3845	#N/A	6242	0.456134	No	No	No
1773		ADpSGEGDFXAEGGGVR*	ADpSGEGDFXAEGGGVR*	0.05	0.304466	6.80685e-05	22464	M33801.metal.pos.txt	Peptide	Fibrinogen cleavage peptide	Shin	3845	#N/A	5359	0.394914	No	No	No
1774		ADpSGEGDFXAEGGGVR*	ADpSGEGDFXAEGGGVR*	0.1	0.130562	0.00032837	39527	M33801.metal.pos.txt	Peptide	Fibrinogen cleavage peptide	Shin	3845	#N/A	3680	0.246613	No	No	No
1775		ADpSGEGDFXAEGGGVR*	ADpSGEGDFXAEGGGVR*	0.2	0.456925	3.04393e-06	68524	M33801.metal.pos.txt	Peptide	Fibrinogen cleavage peptide	Shin	3845	#N/A	6631	0.478975	No	No	No
1776		ADpSGEGDFXAEGGGVR*	ADpSGEGDFXAEGGGVR*	0.3	0.413371	1.246e-05	93701	M33801.metal.pos.txt	Peptide	Fibrinogen cleavage peptide	Shin	3845	#N/A	6281	0.457466	No	No	No
1777		ADpSGEGDFXAEGGGVR*	ADpSGEGDFXAEGGGVR*	0.4	0.44735	4.55634e-06	115949	M33801.metal.pos.txt	Peptide	Fibrinogen cleavage peptide	Shin	3845	#N/A	6551	0.474665	No	No	No
1778		ADpSGEGDFXAEGGGVR*	ADpSGEGDFXAEGGGVR*	0.5	0.317178	5.88282e-05	135387	M33801.metal.pos.txt	Peptide	Fibrinogen cleavage peptide	Shin	3845	#N/A	5468	0.403201	No	No	No
1779	FGFBasic	Basic fibroblast growth factor	FGFBasic	0.001	0.42356	4.91334e-06	2025	FGFBasic	Cytokine	#N/A	Ahola-Olli	7565	#N/A	6366	0.462483	No	No	No
1780		Basic fibroblast growth factor	FGFBasic	0.05	0.22943	7.25256e-05	60055	FGFBasic	Cytokine	#N/A	Ahola-Olli	7565	#N/A	4692	0.33989	No	No	No
1781		Basic fibroblast growth factor	FGFBasic	0.1	0.075804	0.00027174	108068	FGFBasic	Cytokine	#N/A	Ahola-Olli	7565	#N/A	2959	0.178072	No	No	No
1782		Basic fibroblast growth factor	FGFBasic	0.2	0.162665	0.00012787	192835	FGFBasic	Cytokine	#N/A	Ahola-Olli	7565	#N/A	4035	0.280219	No	No	No
1783		Basic fibroblast growth factor	FGFBasic	0.3	0.176627	0.000113904	266865	FGFBasic	Cytokine	#N/A	Ahola-Olli	7565	#N/A	4178	0.293858	No	No	No
1784		Basic fibroblast growth factor	FGFBasic	0.4	0.217446	8.05945e-05	333419	FGFBasic	Cytokine	#N/A	Ahola-Olli	7565	#N/A	4576	0.330304	No	No	No
1785		Basic fibroblast growth factor	FGFBasic	0.5	0.158416	0.000132441	392818	FGFBasic	Cytokine	#N/A	Ahola-Olli	7565	#N/A	3992	0.275838	No	No	No
1786	Summary_statistics_MAGNETIC_L.HDL.PL.txt_TS_Oct2018.so_RAW.txt	phospholipids,in,large,hdl	L.HDL.PL	0.001	0.334554	9.47679e-06	2242	Summary_statistics_MAGNETIC_L.HDL.PL.txt	Lipid	Lipid ratios	Kettunen	19273	#N/A	5635	0.412686	No	No	No
1787		phospholipids,in,large,hdl	L.HDL.PL	0.05	0.379339	4.89714e-06	68619	Summary_statistics_MAGNETIC_L.HDL.PL.txt	Lipid	Lipid ratios	Kettunen	19273	#N/A	5999	0.439537	No	No	No
1788		phospholipids,in,large,hdl	L.HDL.PL	0.1	0.413984	2.45022e-06	124293	Summary_statistics_MAGNETIC_L.HDL.PL.txt	Lipid	Lipid ratios	Kettunen	19273	#N/A	6285	0.457852	No	No	No
1789		phospholipids,in,large,hdl	L.HDL.PL	0.2	0.487284	5.27341e-08	223381	Summary_statistics_MAGNETIC_L.HDL.PL.txt	Lipid	Lipid ratios	Kettunen	19273	#N/A	6861	0.493676	No	No	No
1790		phospholipids,in,large,hdl	L.HDL.PL	0.3	0.440396	1.16691e-06	310903	Summary_statistics_MAGNETIC_L.HDL.PL.txt	Lipid	Lipid ratios	Kettunen	19273	#N/A	6499	0.471025	No	No	No
1791		phospholipids,in,large,hdl	L.HDL.PL	0.4	0.333797	9.56924e-06	390060	Summary_statistics_MAGNETIC_L.HDL.PL.txt	Lipid	Lipid ratios	Kettunen	19273	#N/A	5626	0.412411	No	No	No
1792		phospholipids,in,large,hdl	L.HDL.PL	0.5	0.365235	6.15786e-06	460877	Summary_statistics_MAGNETIC_L.HDL.PL.txt	Lipid	Lipid ratios	Kettunen	19273	#N/A	5880	0.43176	No	No	No
1793	normres_alpha_hydroxybutyrate_imputed_complete_CHARGE.csv_TS_Oct2018.so_RAW.txt	α-hydroxybutyric acid	AHB	0.001	0.441866	1.46983e-05	942	normres_alpha_hydroxybutyrate_imputed_complete_CHARGE.csv	Amino acid	Methionine, Cysteine, SAM and Taurine Metabolism	Rhee	1455	HMDB0000008	6516	0.471364	No	No	No
1794		α-hydroxybutyric acid	AHB	0.05	0.381223	6.27939e-05	25642	normres_alpha_hydroxybutyrate_imputed_complete_CHARGE.csv	Amino acid	Methionine, Cysteine, SAM and Taurine Metabolism	Rhee	1455	HMDB0000008	6018	0.440325	No	No	No
1795		α-hydroxybutyric acid	AHB	0.1	0.422726	2.61136e-05	45470	normres_alpha_hydroxybutyrate_imputed_complete_CHARGE.csv	Amino acid	Methionine, Cysteine, SAM and Taurine Metabolism	Rhee	1455	HMDB0000008	6357	0.462225	No	No	No
1796		α-hydroxybutyric acid	AHB	0.2	0.0967339	0.00116153	79787	normres_alpha_hydroxybutyrate_imputed_complete_CHARGE.csv	Amino acid	Methionine, Cysteine, SAM and Taurine Metabolism	Rhee	1455	HMDB0000008	3230	0.208173	No	No	No
1797		α-hydroxybutyric acid	AHB	0.3	0.084676	0.00129721	109791	normres_alpha_hydroxybutyrate_imputed_complete_CHARGE.csv	Amino acid	Methionine, Cysteine, SAM and Taurine Metabolism	Rhee	1455	HMDB0000008	3089	0.190542	No	No	No
1798		α-hydroxybutyric acid	AHB	0.4	0.0977189	0.00115132	136592	normres_alpha_hydroxybutyrate_imputed_complete_CHARGE.csv	Amino acid	Methionine, Cysteine, SAM and Taurine Metabolism	Rhee	1455	HMDB0000008	3247	0.209191	No	No	No
1799		α-hydroxybutyric acid	AHB	0.5	0.0603795	0.00165324	160350	normres_alpha_hydroxybutyrate_imputed_complete_CHARGE.csv	Amino acid	Methionine, Cysteine, SAM and Taurine Metabolism	Rhee	1455	HMDB0000008	2729	0.153792	No	No	No
1800	M34106	bilirubin (E,Z or Z,E)*	bilirubin (E,Z or Z,E)*	0.001	0.424952	7.21876e-06	857	M34106.metal.pos.txt	Cofactors and vitamins	Hemoglobin and Porphyrin Metabolism	Shin	4961	#N/A	6383	0.462767	No	No	No
1801		bilirubin (E,Z or Z,E)*	bilirubin (E,Z or Z,E)*	0.05	0.422064	7.7923e-06	22466	M34106.metal.pos.txt	Cofactors and vitamins	Hemoglobin and Porphyrin Metabolism	Shin	4961	#N/A	6353	0.461792	No	No	No
1802		bilirubin (E,Z or Z,E)*	bilirubin (E,Z or Z,E)*	0.1	0.134748	0.000245749	39528	M34106.metal.pos.txt	Cofactors and vitamins	Hemoglobin and Porphyrin Metabolism	Shin	4961	#N/A	3729	0.251175	No	No	No
1803		bilirubin (E,Z or Z,E)*	bilirubin (E,Z or Z,E)*	0.2	0.110895	0.000300851	68518	M34106.metal.pos.txt	Cofactors and vitamins	Hemoglobin and Porphyrin Metabolism	Shin	4961	#N/A	3415	0.22572	No	No	No
1804		bilirubin (E,Z or Z,E)*	bilirubin (E,Z or Z,E)*	0.3	0.227239	0.000112765	93690	M34106.metal.pos.txt	Cofactors and vitamins	Hemoglobin and Porphyrin Metabolism	Shin	4961	#N/A	4667	0.338449	No	No	No
1805		bilirubin (E,Z or Z,E)*	bilirubin (E,Z or Z,E)*	0.4	0.386285	1.68372e-05	115945	M34106.metal.pos.txt	Cofactors and vitamins	Hemoglobin and Porphyrin Metabolism	Shin	4961	#N/A	6051	0.443739	No	No	No
1806		bilirubin (E,Z or Z,E)*	bilirubin (E,Z or Z,E)*	0.5	0.412381	9.88284e-06	135373	M34106.metal.pos.txt	Cofactors and vitamins	Hemoglobin and Porphyrin Metabolism	Shin	4961	#N/A	6271	0.457098	No	No	No
1807	normres_TAG58_9_PC1_imputed_complete_CHARGE.csv_TS_Oct2018.so_RAW.txt	TAG 58:9	TAG 58:9	0.001	0.0432025	0.0016366	942	normres_TAG58_9_PC1_imputed_complete_CHARGE.csv	Lipid	Triacylglycerol	Rhee	1795	#N/A	2389	0.125701	No	No	No
1808		TAG 58:9	TAG 58:9	0.05	0.2554	0.000240879	25643	normres_TAG58_9_PC1_imputed_complete_CHARGE.csv	Lipid	Triacylglycerol	Rhee	1795	#N/A	4914	0.36127	No	No	No
1809		TAG 58:9	TAG 58:9	0.1	0.035893	0.00180433	45471	normres_TAG58_9_PC1_imputed_complete_CHARGE.csv	Lipid	Triacylglycerol	Rhee	1795	#N/A	2197	0.11356	No	No	No
1810		TAG 58:9	TAG 58:9	0.2	0.16486	0.000529105	79790	normres_TAG58_9_PC1_imputed_complete_CHARGE.csv	Lipid	Triacylglycerol	Rhee	1795	#N/A	4066	0.281836	No	No	No
1811		TAG 58:9	TAG 58:9	0.3	0.284253	0.000181147	109794	normres_TAG58_9_PC1_imputed_complete_CHARGE.csv	Lipid	Triacylglycerol	Rhee	1795	#N/A	5184	0.381143	No	No	No
1812		TAG 58:9	TAG 58:9	0.4	0.277957	0.000193201	136596	normres_TAG58_9_PC1_imputed_complete_CHARGE.csv	Lipid	Triacylglycerol	Rhee	1795	#N/A	5119	0.377433	No	No	No
1813		TAG 58:9	TAG 58:9	0.5	0.316445	0.000127102	160355	normres_TAG58_9_PC1_imputed_complete_CHARGE.csv	Lipid	Triacylglycerol	Rhee	1795	#N/A	5460	0.402859	No	No	No
1814	MetaAnalysis_PC.ae.C42.4_HetISqLt75_HetDfGt0_HWEPValGt1EMinus6.tsv.fixed_TS_Oct2018.so_RAW.txt	phosphatidylcholine acyl-alkyl c42:4	PC ae C42:4	0.001	0.0941382	0.000231521	936	MetaAnalysis_PC.ae.C42.4_HetISqLt75_HetDfGt0_HWEPValGt1EMinus6.tsv.fixed	Lipid	Glycerophospholipids	Draaisma	7476	#N/A	3200	0.204486	No	No	No
1815		phosphatidylcholine acyl-alkyl c42:4	PC ae C42:4	0.05	0.430165	4.14126e-06	24964	MetaAnalysis_PC.ae.C42.4_HetISqLt75_HetDfGt0_HWEPValGt1EMinus6.tsv.fixed	Lipid	Glycerophospholipids	Draaisma	7476	#N/A	6424	0.465454	No	No	No
1816		phosphatidylcholine acyl-alkyl c42:4	PC ae C42:4	0.1	0.201371	9.36453e-05	44037	MetaAnalysis_PC.ae.C42.4_HetISqLt75_HetDfGt0_HWEPValGt1EMinus6.tsv.fixed	Lipid	Glycerophospholipids	Draaisma	7476	#N/A	4431	0.315895	No	No	No
1817		phosphatidylcholine acyl-alkyl c42:4	PC ae C42:4	0.2	0.13853	0.000158021	76950	MetaAnalysis_PC.ae.C42.4_HetISqLt75_HetDfGt0_HWEPValGt1EMinus6.tsv.fixed	Lipid	Glycerophospholipids	Draaisma	7476	#N/A	3779	0.254809	No	No	No
1818		phosphatidylcholine acyl-alkyl c42:4	PC ae C42:4	0.3	0.10127	0.0002172	105551	MetaAnalysis_PC.ae.C42.4_HetISqLt75_HetDfGt0_HWEPValGt1EMinus6.tsv.fixed	Lipid	Glycerophospholipids	Draaisma	7476	#N/A	3297	0.213505	No	No	No
1819		phosphatidylcholine acyl-alkyl c42:4	PC ae C42:4	0.4	0.0552968	0.000340461	130987	MetaAnalysis_PC.ae.C42.4_HetISqLt75_HetDfGt0_HWEPValGt1EMinus6.tsv.fixed	Lipid	Glycerophospholipids	Draaisma	7476	#N/A	2633	0.145981	No	No	No
1820		phosphatidylcholine acyl-alkyl c42:4	PC ae C42:4	0.5	0.0678111	0.000297834	153388	MetaAnalysis_PC.ae.C42.4_HetISqLt75_HetDfGt0_HWEPValGt1EMinus6.tsv.fixed	Lipid	Glycerophospholipids	Draaisma	7476	#N/A	2837	0.166146	No	No	No
1821	MetaAnalysis_C8.1_HetISqLt75_HetDfGt0_HWEPValGt1EMinus6.tsv.fixed_TS_Oct2018.so_RAW.txt	octenoylcarnitine	C8:1	0.001	0.081058	0.000261386	935	MetaAnalysis_C8.1_HetISqLt75_HetDfGt0_HWEPValGt1EMinus6.tsv.fixed	Lipid	Fatty Acid Metabolism(Acyl Carnitine)	Draaisma	7476	#N/A	3029	0.186013	No	No	No
1822		octenoylcarnitine	C8:1	0.05	0.0322047	0.000457365	24971	MetaAnalysis_C8.1_HetISqLt75_HetDfGt0_HWEPValGt1EMinus6.tsv.fixed	Lipid	Fatty Acid Metabolism(Acyl Carnitine)	Draaisma	7476	#N/A	2094	0.106903	No	No	No
1823		octenoylcarnitine	C8:1	0.1	0.0892459	0.000242097	44032	MetaAnalysis_C8.1_HetISqLt75_HetDfGt0_HWEPValGt1EMinus6.tsv.fixed	Lipid	Fatty Acid Metabolism(Acyl Carnitine)	Draaisma	7476	#N/A	3152	0.196811	No	No	No
1824		octenoylcarnitine	C8:1	0.2	0.0210873	0.000552039	76915	MetaAnalysis_C8.1_HetISqLt75_HetDfGt0_HWEPValGt1EMinus6.tsv.fixed	Lipid	Fatty Acid Metabolism(Acyl Carnitine)	Draaisma	7476	#N/A	1810	0.0809822	No	No	No
1825		octenoylcarnitine	C8:1	0.3	0.0476235	0.000372239	105513	MetaAnalysis_C8.1_HetISqLt75_HetDfGt0_HWEPValGt1EMinus6.tsv.fixed	Lipid	Fatty Acid Metabolism(Acyl Carnitine)	Draaisma	7476	#N/A	2481	0.133427	No	No	No
1826		octenoylcarnitine	C8:1	0.4	0.0446786	0.000385949	130962	MetaAnalysis_C8.1_HetISqLt75_HetDfGt0_HWEPValGt1EMinus6.tsv.fixed	Lipid	Fatty Acid Metabolism(Acyl Carnitine)	Draaisma	7476	#N/A	2417	0.12849	No	No	No
1827		octenoylcarnitine	C8:1	0.5	0.0289604	0.000480882	153365	MetaAnalysis_C8.1_HetISqLt75_HetDfGt0_HWEPValGt1EMinus6.tsv.fixed	Lipid	Fatty Acid Metabolism(Acyl Carnitine)	Draaisma	7476	#N/A	2023	0.0995076	No	No	No
1828	MetaAnalysis_PC.aa.C38.5_HetISqLt75_HetDfGt0_HWEPValGt1EMinus6.tsv.fixed_TS_Oct2018.so_RAW.txt	phosphatidylcholine diacyl c38:5	PC aa C38:5	0.001	0.388956	1.06445e-05	937	MetaAnalysis_PC.aa.C38.5_HetISqLt75_HetDfGt0_HWEPValGt1EMinus6.tsv.fixed	Lipid	Glycerophospholipids	Draaisma	7473	#N/A	6070	0.445409	No	No	No
1829		phosphatidylcholine diacyl c38:5	PC aa C38:5	0.05	0.145125	0.000149656	24940	MetaAnalysis_PC.aa.C38.5_HetISqLt75_HetDfGt0_HWEPValGt1EMinus6.tsv.fixed	Lipid	Glycerophospholipids	Draaisma	7473	#N/A	3850	0.262016	No	No	No
1830		phosphatidylcholine diacyl c38:5	PC aa C38:5	0.1	0.0378644	0.000421999	44008	MetaAnalysis_PC.aa.C38.5_HetISqLt75_HetDfGt0_HWEPValGt1EMinus6.tsv.fixed	Lipid	Glycerophospholipids	Draaisma	7473	#N/A	2259	0.11651	No	No	No
1831		phosphatidylcholine diacyl c38:5	PC aa C38:5	0.2	0.000870251	0.00131118	76916	MetaAnalysis_PC.aa.C38.5_HetISqLt75_HetDfGt0_HWEPValGt1EMinus6.tsv.fixed	Lipid	Glycerophospholipids	Draaisma	7473	#N/A	642	0.0094223	Yes	Yes	No
1832		phosphatidylcholine diacyl c38:5	PC aa C38:5	0.3	0.000290357	0.00158269	105508	MetaAnalysis_PC.aa.C38.5_HetISqLt75_HetDfGt0_HWEPValGt1EMinus6.tsv.fixed	Lipid	Glycerophospholipids	Draaisma	7473	#N/A	447	0.00451515	Yes	Yes	No
1833		phosphatidylcholine diacyl c38:5	PC aa C38:5	0.4	6.98851e-05	0.00193914	130923	MetaAnalysis_PC.aa.C38.5_HetISqLt75_HetDfGt0_HWEPValGt1EMinus6.tsv.fixed	Lipid	Glycerophospholipids	Draaisma	7473	#N/A	264	0.00184004	Yes	Yes	No
1834		phosphatidylcholine diacyl c38:5	PC aa C38:5	0.5	3.73237e-05	0.00209726	153324	MetaAnalysis_PC.aa.C38.5_HetISqLt75_HetDfGt0_HWEPValGt1EMinus6.tsv.fixed	Lipid	Glycerophospholipids	Draaisma	7473	#N/A	207	0.00125332	Yes	Yes	No
1835	normres_ratio_anthr_to_trp_imputed_complete_CHARGE.csv_TS_Oct2018.so_RAW.txt	ratio_anthr_to_trp	ratio_anthr_to_trp	0.001	0.0254229	0.00211394	942	normres_ratio_anthr_to_trp_imputed_complete_CHARGE.csv	Amino acid	Ratios	Rhee	1802	#N/A	1945	0.0908559	No	No	No
1836		ratio_anthr_to_trp	ratio_anthr_to_trp	0.05	0.132459	0.000689482	25643	normres_ratio_anthr_to_trp_imputed_complete_CHARGE.csv	Amino acid	Ratios	Rhee	1802	#N/A	3700	0.248844	No	No	No
1837		ratio_anthr_to_trp	ratio_anthr_to_trp	0.1	0.18381	0.000450338	45471	normres_ratio_anthr_to_trp_imputed_complete_CHARGE.csv	Amino acid	Ratios	Rhee	1802	#N/A	4259	0.299992	No	No	No
1838		ratio_anthr_to_trp	ratio_anthr_to_trp	0.2	0.249418	0.000253803	79790	normres_ratio_anthr_to_trp_imputed_complete_CHARGE.csv	Amino acid	Ratios	Rhee	1802	#N/A	4864	0.356436	No	No	No
1839		ratio_anthr_to_trp	ratio_anthr_to_trp	0.3	0.192588	0.000418401	109794	normres_ratio_anthr_to_trp_imputed_complete_CHARGE.csv	Amino acid	Ratios	Rhee	1802	#N/A	4339	0.308522	No	No	No
1840		ratio_anthr_to_trp	ratio_anthr_to_trp	0.4	0.135935	0.000669746	136596	normres_ratio_anthr_to_trp_imputed_complete_CHARGE.csv	Amino acid	Ratios	Rhee	1802	#N/A	3745	0.252306	No	No	No
1841		ratio_anthr_to_trp	ratio_anthr_to_trp	0.5	0.0997304	0.000913189	160355	normres_ratio_anthr_to_trp_imputed_complete_CHARGE.csv	Amino acid	Ratios	Rhee	1802	#N/A	3272	0.211866	No	No	No
1842	M33250	X-11905	X-11905	0.001	0.4857	2.91538e-07	854	M33250.metal.pos.txt	Unknown	Unknown	Shin	4409	#N/A	6852	0.492718	No	No	No
1843		X-11905	X-11905	0.05	0.392997	1.67204e-05	22362	M33250.metal.pos.txt	Unknown	Unknown	Shin	4409	#N/A	6107	0.44731	No	No	No
1844		X-11905	X-11905	0.1	0.199374	0.000161497	39366	M33250.metal.pos.txt	Unknown	Unknown	Shin	4409	#N/A	4408	0.314394	No	No	No
1845		X-11905	X-11905	0.2	0.120834	0.000310869	68214	M33250.metal.pos.txt	Unknown	Unknown	Shin	4409	#N/A	3549	0.236663	No	No	No
1846		X-11905	X-11905	0.3	0.215596	0.000140524	93279	M33250.metal.pos.txt	Unknown	Unknown	Shin	4409	#N/A	4556	0.32893	No	No	No
1847		X-11905	X-11905	0.4	0.181322	0.000187943	115382	M33250.metal.pos.txt	Unknown	Unknown	Shin	4409	#N/A	4227	0.29817	No	No	No
1848		X-11905	X-11905	0.5	0.241992	0.000111102	134707	M33250.metal.pos.txt	Unknown	Unknown	Shin	4409	#N/A	4788	0.351312	No	No	No
1849	MCSF	Macrophage colony-stimulating factor	MCSF	0.001	0.48954	8.18537e-07	1966	MCSF	Cytokine	#N/A	Ahola-Olli	840	#N/A	6877	0.494808	No	No	No
1850		Macrophage colony-stimulating factor	MCSF	0.05	0.027341	0.00438531	57735	MCSF	Cytokine	#N/A	Ahola-Olli	840	#N/A	1984	0.0957899	No	No	No
1851		Macrophage colony-stimulating factor	MCSF	0.1	0.0105342	0.00631465	103687	MCSF	Cytokine	#N/A	Ahola-Olli	840	#N/A	1434	0.0510624	No	No	No
1852		Macrophage colony-stimulating factor	MCSF	0.2	0.00383778	0.00842579	184682	MCSF	Cytokine	#N/A	Ahola-Olli	840	#N/A	1042	0.0256011	Yes	No	No
1853		Macrophage colony-stimulating factor	MCSF	0.3	0.0157822	0.00548728	255376	MCSF	Cytokine	#N/A	Ahola-Olli	840	#N/A	1619	0.067759	No	No	No
1854		Macrophage colony-stimulating factor	MCSF	0.4	0.00679015	0.00722603	318809	MCSF	Cytokine	#N/A	Ahola-Olli	840	#N/A	1234	0.0382483	Yes	No	No
1855		Macrophage colony-stimulating factor	MCSF	0.5	0.00861276	0.00673111	375127	MCSF	Cytokine	#N/A	Ahola-Olli	840	#N/A	1348	0.044412	Yes	No	No
1856	M36103	p-cresol sulfate	p-cresol sulfate	0.001	1.2909e-05	0.00241853	856	M36103.metal.pos.txt	Amino acid	Phenylalanine and Tyrosine Metabolism	Shin	7311	HMDB0011635	132	0.000679776	Yes	Yes	No
1857		p-cresol sulfate	p-cresol sulfate	0.05	0.00181764	0.00115616	22463	M36103.metal.pos.txt	Amino acid	Phenylalanine and Tyrosine Metabolism	Shin	7311	HMDB0011635	810	0.0155981	Yes	No	No
1858		p-cresol sulfate	p-cresol sulfate	0.1	6.16161e-05	0.00201446	39525	M36103.metal.pos.txt	Amino acid	Phenylalanine and Tyrosine Metabolism	Shin	7311	HMDB0011635	249	0.00172005	Yes	Yes	No
1859		p-cresol sulfate	p-cresol sulfate	0.2	7.80721e-05	0.00195359	68520	M36103.metal.pos.txt	Amino acid	Phenylalanine and Tyrosine Metabolism	Shin	7311	HMDB0011635	277	0.00195913	Yes	Yes	No
1860		p-cresol sulfate	p-cresol sulfate	0.3	1.057e-05	0.00247044	93696	M36103.metal.pos.txt	Amino acid	Phenylalanine and Tyrosine Metabolism	Shin	7311	HMDB0011635	119	0.000617412	Yes	Yes	No
1861		p-cresol sulfate	p-cresol sulfate	0.4	1.92735e-05	0.0023146	115946	M36103.metal.pos.txt	Amino acid	Phenylalanine and Tyrosine Metabolism	Shin	7311	HMDB0011635	156	0.000858783	Yes	Yes	No
1862		p-cresol sulfate	p-cresol sulfate	0.5	3.12707e-05	0.00218938	135379	M36103.metal.pos.txt	Amino acid	Phenylalanine and Tyrosine Metabolism	Shin	7311	HMDB0011635	192	0.0011321	Yes	Yes	No
1863	Summary_statistics_MAGNETIC_L.LDL.L.txt_TS_Oct2018.so_RAW.txt	total,lipids,in,large,ldl	L.LDL.L	0.001	0.114245	7.52443e-05	2242	Summary_statistics_MAGNETIC_L.LDL.L.txt	Lipid	Lipid ratios	Kettunen	19273	#N/A	3465	0.229182	No	No	No
1864		total,lipids,in,large,ldl	L.LDL.L	0.05	0.0351815	0.000169888	68619	Summary_statistics_MAGNETIC_L.LDL.L.txt	Lipid	Lipid ratios	Kettunen	19273	#N/A	2183	0.112023	No	No	No
1865		total,lipids,in,large,ldl	L.LDL.L	0.1	0.000655508	0.000535681	124293	Summary_statistics_MAGNETIC_L.LDL.L.txt	Lipid	Lipid ratios	Kettunen	19273	#N/A	584	0.00780212	Yes	Yes	No
1866		total,lipids,in,large,ldl	L.LDL.L	0.2	0.000101763	0.000715681	223381	Summary_statistics_MAGNETIC_L.LDL.L.txt	Lipid	Lipid ratios	Kettunen	19273	#N/A	313	0.00225992	Yes	Yes	No
1867		total,lipids,in,large,ldl	L.LDL.L	0.3	0.000324408	0.000603275	310903	Summary_statistics_MAGNETIC_L.LDL.L.txt	Lipid	Lipid ratios	Kettunen	19273	#N/A	465	0.00484938	Yes	Yes	No
1868		total,lipids,in,large,ldl	L.LDL.L	0.4	0.000160865	0.000671152	390060	Summary_statistics_MAGNETIC_L.LDL.L.txt	Lipid	Lipid ratios	Kettunen	19273	#N/A	371	0.00301394	Yes	Yes	No
1869		total,lipids,in,large,ldl	L.LDL.L	0.5	0.000418809	0.000578672	460877	Summary_statistics_MAGNETIC_L.LDL.L.txt	Lipid	Lipid ratios	Kettunen	19273	#N/A	504	0.00577607	Yes	Yes	No
1870	M00064	phenylalanine	Phe	0.001	0.444268	2.67115e-06	856	M00064.metal.pos.txt	Amino acid	Phenylalanine and Tyrosine Metabolism	Shin	7354	HMDB0000159	6528	0.473056	No	No	No
1871		phenylalanine	Phe	0.05	0.181799	0.000112236	22462	M00064.metal.pos.txt	Amino acid	Phenylalanine and Tyrosine Metabolism	Shin	7354	HMDB0000159	4236	0.29832	No	No	No
1872		phenylalanine	Phe	0.1	0.162018	0.000132243	39526	M00064.metal.pos.txt	Amino acid	Phenylalanine and Tyrosine Metabolism	Shin	7354	HMDB0000159	4026	0.279729	No	No	No
1873		phenylalanine	Phe	0.2	0.0837614	0.000259005	68518	M00064.metal.pos.txt	Amino acid	Phenylalanine and Tyrosine Metabolism	Shin	7354	HMDB0000159	3074	0.189403	No	No	No
1874		phenylalanine	Phe	0.3	0.0587281	0.000333221	93695	M00064.metal.pos.txt	Amino acid	Phenylalanine and Tyrosine Metabolism	Shin	7354	HMDB0000159	2700	0.151192	No	No	No
1875		phenylalanine	Phe	0.4	0.0777934	0.000274181	115944	M00064.metal.pos.txt	Amino acid	Phenylalanine and Tyrosine Metabolism	Shin	7354	HMDB0000159	2980	0.181457	No	No	No
1876		phenylalanine	Phe	0.5	0.0679177	0.000302445	135377	M00064.metal.pos.txt	Amino acid	Phenylalanine and Tyrosine Metabolism	Shin	7354	HMDB0000159	2841	0.166172	No	No	No
1877	Summary_statistics_MAGNETIC_Cit.txt_TS_Oct2018.so_RAW.txt	citrate	Cit	0.001	0.0283392	0.000146619	2250	Summary_statistics_MAGNETIC_Cit.txt	Energy	TCA Cycle	Kettunen	24770	HMDB0000094	2012	0.0979054	No	No	No
1878		citrate	Cit	0.05	0.147157	4.43986e-05	68889	Summary_statistics_MAGNETIC_Cit.txt	Energy	TCA Cycle	Kettunen	24770	HMDB0000094	3866	0.264586	No	No	No
1879		citrate	Cit	0.1	0.0700252	8.79011e-05	124827	Summary_statistics_MAGNETIC_Cit.txt	Energy	TCA Cycle	Kettunen	24770	HMDB0000094	2875	0.169303	No	No	No
1880		citrate	Cit	0.2	0.0349295	0.000132665	224426	Summary_statistics_MAGNETIC_Cit.txt	Energy	TCA Cycle	Kettunen	24770	HMDB0000094	2175	0.11163	No	No	No
1881		citrate	Cit	0.3	0.0445331	0.000116714	312379	Summary_statistics_MAGNETIC_Cit.txt	Energy	TCA Cycle	Kettunen	24770	HMDB0000094	2415	0.128178	No	No	No
1882		citrate	Cit	0.4	0.0501585	0.000109017	391898	Summary_statistics_MAGNETIC_Cit.txt	Energy	TCA Cycle	Kettunen	24770	HMDB0000094	2532	0.137698	No	No	No
1883		citrate	Cit	0.5	0.090638	7.21465e-05	463043	Summary_statistics_MAGNETIC_Cit.txt	Energy	TCA Cycle	Kettunen	24770	HMDB0000094	3173	0.198558	No	No	No
1884	M32847	X-11530	X-11530	0.001	0.138899	0.000169044	856	M32847.metal.pos.txt	Unknown	Unknown	Shin	6967	#N/A	3782	0.255285	No	No	No
1885		X-11530	X-11530	0.05	0.0275736	0.000527725	22463	M32847.metal.pos.txt	Unknown	Unknown	Shin	6967	#N/A	1989	0.0963619	No	No	No
1886		X-11530	X-11530	0.1	0.0269338	0.000533343	39532	M32847.metal.pos.txt	Unknown	Unknown	Shin	6967	#N/A	1970	0.0950341	No	No	No
1887		X-11530	X-11530	0.2	0.00399804	0.00100916	68525	M32847.metal.pos.txt	Unknown	Unknown	Shin	6967	#N/A	1055	0.0263416	Yes	No	No
1888		X-11530	X-11530	0.3	0.011261	0.000746814	93702	M32847.metal.pos.txt	Unknown	Unknown	Shin	6967	#N/A	1470	0.0532485	No	No	No
1889		X-11530	X-11530	0.4	0.00808923	0.000829765	115949	M32847.metal.pos.txt	Unknown	Unknown	Shin	6967	#N/A	1316	0.0427266	Yes	No	No
1890		X-11530	X-11530	0.5	0.00453746	0.000976704	135385	M32847.metal.pos.txt	Unknown	Unknown	Shin	6967	#N/A	1091	0.0289092	Yes	No	No
1891	MetaAnalysis_PC.ae.C44.5_HetISqLt75_HetDfGt0_HWEPValGt1EMinus6.tsv.fixed_TS_Oct2018.so_RAW.txt	phosphatidylcholine acyl-alkyl c44:5	PC ae C44:5	0.001	0.0126528	0.000668964	935	MetaAnalysis_PC.ae.C44.5_HetISqLt75_HetDfGt0_HWEPValGt1EMinus6.tsv.fixed	Lipid	Glycerophospholipids	Draaisma	7476	#N/A	1528	0.0575588	No	No	No
1892		phosphatidylcholine acyl-alkyl c44:5	PC ae C44:5	0.05	0.319385	2.94744e-05	24961	MetaAnalysis_PC.ae.C44.5_HetISqLt75_HetDfGt0_HWEPValGt1EMinus6.tsv.fixed	Lipid	Glycerophospholipids	Draaisma	7476	#N/A	5489	0.404454	No	No	No
1893		phosphatidylcholine acyl-alkyl c44:5	PC ae C44:5	0.1	0.189198	0.000103781	44014	MetaAnalysis_PC.ae.C44.5_HetISqLt75_HetDfGt0_HWEPValGt1EMinus6.tsv.fixed	Lipid	Glycerophospholipids	Draaisma	7476	#N/A	4307	0.305344	No	No	No
1894		phosphatidylcholine acyl-alkyl c44:5	PC ae C44:5	0.2	0.0487272	0.000367337	76928	MetaAnalysis_PC.ae.C44.5_HetISqLt75_HetDfGt0_HWEPValGt1EMinus6.tsv.fixed	Lipid	Glycerophospholipids	Draaisma	7476	#N/A	2501	0.135427	No	No	No
1895		phosphatidylcholine acyl-alkyl c44:5	PC ae C44:5	0.3	0.0481754	0.000369773	105522	MetaAnalysis_PC.ae.C44.5_HetISqLt75_HetDfGt0_HWEPValGt1EMinus6.tsv.fixed	Lipid	Glycerophospholipids	Draaisma	7476	#N/A	2489	0.134539	No	No	No
1896		phosphatidylcholine acyl-alkyl c44:5	PC ae C44:5	0.4	0.0405217	0.000407067	130950	MetaAnalysis_PC.ae.C44.5_HetISqLt75_HetDfGt0_HWEPValGt1EMinus6.tsv.fixed	Lipid	Glycerophospholipids	Draaisma	7476	#N/A	2324	0.121199	No	No	No
1897		phosphatidylcholine acyl-alkyl c44:5	PC ae C44:5	0.5	0.0357761	0.000434235	153350	MetaAnalysis_PC.ae.C44.5_HetISqLt75_HetDfGt0_HWEPValGt1EMinus6.tsv.fixed	Lipid	Glycerophospholipids	Draaisma	7476	#N/A	2195	0.113294	No	No	No
1898	Summary_statistics_MAGNETIC_LA.txt_TS_Oct2018.so_RAW.txt	linoleate (18:2n6)	LA	0.001	0.0417816	0.000221325	2228	Summary_statistics_MAGNETIC_LA.txt	Lipid	Polyunsaturated Fatty Acid (n3 and n6)	Kettunen	13527	HMDB0000673	2357	0.123218	No	No	No
1899		linoleate (18:2n6)	LA	0.05	0.0493281	0.000201586	68155	Summary_statistics_MAGNETIC_LA.txt	Lipid	Polyunsaturated Fatty Acid (n3 and n6)	Kettunen	13527	HMDB0000673	2518	0.136171	No	No	No
1900		linoleate (18:2n6)	LA	0.1	0.0187897	0.000319603	123329	Summary_statistics_MAGNETIC_LA.txt	Lipid	Polyunsaturated Fatty Acid (n3 and n6)	Kettunen	13527	HMDB0000673	1723	0.0758022	No	No	No
1901		linoleate (18:2n6)	LA	0.2	0.023455	0.000291864	221641	Summary_statistics_MAGNETIC_LA.txt	Lipid	Polyunsaturated Fatty Acid (n3 and n6)	Kettunen	13527	HMDB0000673	1881	0.0866749	No	No	No
1902		linoleate (18:2n6)	LA	0.3	0.0219014	0.000300402	308411	Summary_statistics_MAGNETIC_LA.txt	Lipid	Polyunsaturated Fatty Acid (n3 and n6)	Kettunen	13527	HMDB0000673	1837	0.0828723	No	No	No
1903		linoleate (18:2n6)	LA	0.4	0.00844251	0.000421903	386872	Summary_statistics_MAGNETIC_LA.txt	Lipid	Polyunsaturated Fatty Acid (n3 and n6)	Kettunen	13527	HMDB0000673	1336	0.043925	Yes	No	No
1904		linoleate (18:2n6)	LA	0.5	0.0101766	0.000397743	457057	Summary_statistics_MAGNETIC_LA.txt	Lipid	Polyunsaturated Fatty Acid (n3 and n6)	Kettunen	13527	HMDB0000673	1417	0.0499208	Yes	No	No
1905	M01645	laurate (12:0)	LR	0.001	0.102433	0.000218782	856	M01645.metal.pos.txt	Lipid	Medium Chain Fatty Acid	Shin	7346	HMDB0000638	3313	0.214914	No	No	No
1906		laurate (12:0)	LR	0.05	1.59857e-06	0.00294888	22465	M01645.metal.pos.txt	Lipid	Medium Chain Fatty Acid	Shin	7346	HMDB0000638	41	0.000271016	Yes	Yes	Yes
1907		laurate (12:0)	LR	0.1	3.7657e-07	0.00332608	39530	M01645.metal.pos.txt	Lipid	Medium Chain Fatty Acid	Shin	7346	HMDB0000638	21	0.000124645	Yes	Yes	Yes
1908		laurate (12:0)	LR	0.2	1.68841e-06	0.00293464	68525	M01645.metal.pos.txt	Lipid	Medium Chain Fatty Acid	Shin	7346	HMDB0000638	42	0.000279432	Yes	Yes	Yes
1909		laurate (12:0)	LR	0.3	1.31296e-06	0.00300014	93701	M01645.metal.pos.txt	Lipid	Medium Chain Fatty Acid	Shin	7346	HMDB0000638	36	0.000253511	Yes	Yes	Yes
1910		laurate (12:0)	LR	0.4	8.16505e-06	0.00252547	115952	M01645.metal.pos.txt	Lipid	Medium Chain Fatty Acid	Shin	7346	HMDB0000638	106	0.000535427	Yes	Yes	No
1911		laurate (12:0)	LR	0.5	4.43759e-05	0.00208903	135388	M01645.metal.pos.txt	Lipid	Medium Chain Fatty Acid	Shin	7346	HMDB0000638	217	0.00142146	Yes	Yes	No
1912	normres_TAG48_0_imputed_complete_CHARGE.csv_TS_Oct2018.so_RAW.txt	TAG 48:0	TAG 48:0	0.001	0.495038	8.60812e-08	942	normres_TAG48_0_imputed_complete_CHARGE.csv	Lipid	Triacylglycerol	Rhee	1797	#N/A	6915	0.497616	No	No	No
1913		TAG 48:0	TAG 48:0	0.05	0.000983496	0.00531697	25643	normres_TAG48_0_imputed_complete_CHARGE.csv	Lipid	Triacylglycerol	Rhee	1797	#N/A	663	0.0103111	Yes	No	No
1914		TAG 48:0	TAG 48:0	0.1	0.000312273	0.00649045	45471	normres_TAG48_0_imputed_complete_CHARGE.csv	Lipid	Triacylglycerol	Rhee	1797	#N/A	460	0.00471872	Yes	Yes	No
1915		TAG 48:0	TAG 48:0	0.2	2.22097e-05	0.00923508	79790	normres_TAG48_0_imputed_complete_CHARGE.csv	Lipid	Triacylglycerol	Rhee	1797	#N/A	163	0.000947114	Yes	Yes	No
1916		TAG 48:0	TAG 48:0	0.3	5.10945e-05	0.00836538	109794	normres_TAG48_0_imputed_complete_CHARGE.csv	Lipid	Triacylglycerol	Rhee	1797	#N/A	230	0.00154416	Yes	Yes	No
1917		TAG 48:0	TAG 48:0	0.4	1.84496e-05	0.00942915	136596	normres_TAG48_0_imputed_complete_CHARGE.csv	Lipid	Triacylglycerol	Rhee	1797	#N/A	153	0.000838191	Yes	Yes	No
1918		TAG 48:0	TAG 48:0	0.5	5.66196e-06	0.0106683	160355	normres_TAG48_0_imputed_complete_CHARGE.csv	Lipid	Triacylglycerol	Rhee	1797	#N/A	89	0.000442205	Yes	Yes	Yes
1919	M32319	trans-4-hydroxyproline	trans-4-hydroxyproline	0.001	0.394773	9.68399e-06	856	M32319.metal.pos.txt	Amino acid	Urea cycle; Arginine and Proline Metabolism	Shin	7356	HMDB0000725	6123	0.448157	No	No	No
1920		trans-4-hydroxyproline	trans-4-hydroxyproline	0.05	0.474492	5.56532e-07	22465	M32319.metal.pos.txt	Amino acid	Urea cycle; Arginine and Proline Metabolism	Shin	7356	HMDB0000725	6769	0.48725	No	No	No
1921		trans-4-hydroxyproline	trans-4-hydroxyproline	0.1	0.357226	1.81988e-05	39527	M32319.metal.pos.txt	Amino acid	Urea cycle; Arginine and Proline Metabolism	Shin	7356	HMDB0000725	5822	0.426499	No	No	No
1922		trans-4-hydroxyproline	trans-4-hydroxyproline	0.2	0.438851	3.21918e-06	68521	M32319.metal.pos.txt	Amino acid	Urea cycle; Arginine and Proline Metabolism	Shin	7356	HMDB0000725	6485	0.470385	No	No	No
1923		trans-4-hydroxyproline	trans-4-hydroxyproline	0.3	0.168785	0.000125011	93694	M32319.metal.pos.txt	Amino acid	Urea cycle; Arginine and Proline Metabolism	Shin	7356	HMDB0000725	4105	0.285804	No	No	No
1924		trans-4-hydroxyproline	trans-4-hydroxyproline	0.4	0.102881	0.000217622	115945	M32319.metal.pos.txt	Amino acid	Urea cycle; Arginine and Proline Metabolism	Shin	7356	HMDB0000725	3319	0.215464	No	No	No
1925		trans-4-hydroxyproline	trans-4-hydroxyproline	0.5	0.125722	0.000178785	135382	M32319.metal.pos.txt	Amino acid	Urea cycle; Arginine and Proline Metabolism	Shin	7356	HMDB0000725	3614	0.241809	No	No	No
1926	MetaAnalysis_PC.ae.C36.2_HetISqLt75_HetDfGt0_HWEPValGt1EMinus6.tsv.fixed_TS_Oct2018.so_RAW.txt	phosphatidylcholine acyl-alkyl c36:2	PC ae C36:2	0.001	0.336971	2.36821e-05	939	MetaAnalysis_PC.ae.C36.2_HetISqLt75_HetDfGt0_HWEPValGt1EMinus6.tsv.fixed	Lipid	Glycerophospholipids	Draaisma	7475	#N/A	5656	0.414124	No	No	No
1927		phosphatidylcholine acyl-alkyl c36:2	PC ae C36:2	0.05	0.257476	5.67196e-05	24942	MetaAnalysis_PC.ae.C36.2_HetISqLt75_HetDfGt0_HWEPValGt1EMinus6.tsv.fixed	Lipid	Glycerophospholipids	Draaisma	7475	#N/A	4933	0.362805	No	No	No
1928		phosphatidylcholine acyl-alkyl c36:2	PC ae C36:2	0.1	0.485614	1.7404e-07	44003	MetaAnalysis_PC.ae.C36.2_HetISqLt75_HetDfGt0_HWEPValGt1EMinus6.tsv.fixed	Lipid	Glycerophospholipids	Draaisma	7475	#N/A	6850	0.492774	No	No	No
1929		phosphatidylcholine acyl-alkyl c36:2	PC ae C36:2	0.2	0.443561	2.69547e-06	76923	MetaAnalysis_PC.ae.C36.2_HetISqLt75_HetDfGt0_HWEPValGt1EMinus6.tsv.fixed	Lipid	Glycerophospholipids	Draaisma	7475	#N/A	6523	0.472665	No	No	No
1930		phosphatidylcholine acyl-alkyl c36:2	PC ae C36:2	0.3	0.435794	3.4954e-06	105517	MetaAnalysis_PC.ae.C36.2_HetISqLt75_HetDfGt0_HWEPValGt1EMinus6.tsv.fixed	Lipid	Glycerophospholipids	Draaisma	7475	#N/A	6464	0.468627	No	No	No
1931		phosphatidylcholine acyl-alkyl c36:2	PC ae C36:2	0.4	0.415274	6.12645e-06	130952	MetaAnalysis_PC.ae.C36.2_HetISqLt75_HetDfGt0_HWEPValGt1EMinus6.tsv.fixed	Lipid	Glycerophospholipids	Draaisma	7475	#N/A	6293	0.458695	No	No	No
1932		phosphatidylcholine acyl-alkyl c36:2	PC ae C36:2	0.5	0.453142	1.85414e-06	153361	MetaAnalysis_PC.ae.C36.2_HetISqLt75_HetDfGt0_HWEPValGt1EMinus6.tsv.fixed	Lipid	Glycerophospholipids	Draaisma	7475	#N/A	6604	0.476952	No	No	No
1933	Summary_statistics_MAGNETIC_XL.HDL.P.txt_TS_Oct2018.so_RAW.txt	concentration,of,very,large,hdl,particles	XL.HDL.P	0.001	0.307372	1.31439e-05	2242	Summary_statistics_MAGNETIC_XL.HDL.P.txt	Lipid	Lipid ratios	Kettunen	19273	#N/A	5385	0.396758	No	No	No
1934		concentration,of,very,large,hdl,particles	XL.HDL.P	0.05	0.116663	7.37002e-05	68619	Summary_statistics_MAGNETIC_XL.HDL.P.txt	Lipid	Lipid ratios	Kettunen	19273	#N/A	3497	0.23189	No	No	No
1935		concentration,of,very,large,hdl,particles	XL.HDL.P	0.1	0.300465	1.41957e-05	124293	Summary_statistics_MAGNETIC_XL.HDL.P.txt	Lipid	Lipid ratios	Kettunen	19273	#N/A	5327	0.392065	No	No	No
1936		concentration,of,very,large,hdl,particles	XL.HDL.P	0.2	0.498597	6.41687e-10	223381	Summary_statistics_MAGNETIC_XL.HDL.P.txt	Lipid	Lipid ratios	Kettunen	19273	#N/A	6939	0.499459	No	No	No
1937		concentration,of,very,large,hdl,particles	XL.HDL.P	0.3	0.446306	9.45608e-07	310903	Summary_statistics_MAGNETIC_XL.HDL.P.txt	Lipid	Lipid ratios	Kettunen	19273	#N/A	6540	0.474354	No	No	No
1938		concentration,of,very,large,hdl,particles	XL.HDL.P	0.4	0.469222	3.09431e-07	390060	Summary_statistics_MAGNETIC_XL.HDL.P.txt	Lipid	Lipid ratios	Kettunen	19273	#N/A	6733	0.484415	No	No	No
1939		concentration,of,very,large,hdl,particles	XL.HDL.P	0.5	0.39943	3.36923e-06	460877	Summary_statistics_MAGNETIC_XL.HDL.P.txt	Lipid	Lipid ratios	Kettunen	19273	#N/A	6162	0.450574	No	No	No
1940	Summary_statistics_MAGNETIC_Lac.txt_TS_Oct2018.so_RAW.txt	lactate	Lac	0.001	0.170223	3.65379e-05	2250	Summary_statistics_MAGNETIC_Lac.txt	Carbohydrate	Glycolysis, Gluconeogenesis, and Pyruvate Metabolism	Kettunen	24871	HMDB0000190	4119	0.287259	No	No	No
1941		lactate	Lac	0.05	3.34932e-05	0.000638858	68866	Summary_statistics_MAGNETIC_Lac.txt	Carbohydrate	Glycolysis, Gluconeogenesis, and Pyruvate Metabolism	Kettunen	24871	HMDB0000190	200	0.00116406	Yes	Yes	No
1942		lactate	Lac	0.1	0.000537648	0.000429854	124785	Summary_statistics_MAGNETIC_Lac.txt	Carbohydrate	Glycolysis, Gluconeogenesis, and Pyruvate Metabolism	Kettunen	24871	HMDB0000190	536	0.00697237	Yes	Yes	No
1943		lactate	Lac	0.2	2.56772e-05	0.000659083	224360	Summary_statistics_MAGNETIC_Lac.txt	Carbohydrate	Glycolysis, Gluconeogenesis, and Pyruvate Metabolism	Kettunen	24871	HMDB0000190	173	0.00103169	Yes	Yes	No
1944		lactate	Lac	0.3	0.000151926	0.000524429	312313	Summary_statistics_MAGNETIC_Lac.txt	Carbohydrate	Glycolysis, Gluconeogenesis, and Pyruvate Metabolism	Kettunen	24871	HMDB0000190	361	0.00292531	Yes	Yes	No
1945		lactate	Lac	0.4	0.000325733	0.000467216	391829	Summary_statistics_MAGNETIC_Lac.txt	Carbohydrate	Glycolysis, Gluconeogenesis, and Pyruvate Metabolism	Kettunen	24871	HMDB0000190	467	0.00484833	Yes	Yes	No
1946		lactate	Lac	0.5	0.000498497	0.000435478	462943	Summary_statistics_MAGNETIC_Lac.txt	Carbohydrate	Glycolysis, Gluconeogenesis, and Pyruvate Metabolism	Kettunen	24871	HMDB0000190	524	0.0066127	Yes	Yes	No
1947	M36131	X-14205--alpha-glutamyltyrosine	X-14205--alpha-glutamyltyrosine	0.001	0.133592	0.000691416	857	M36131.metal.pos.txt	Peptide	Dipeptide	Shin	1780	#N/A	3715	0.249959	No	No	No
1948		X-14205--alpha-glutamyltyrosine	X-14205--alpha-glutamyltyrosine	0.05	0.00455737	0.00381305	22462	M36131.metal.pos.txt	Peptide	Dipeptide	Shin	1780	#N/A	1094	0.0289563	Yes	No	No
1949		X-14205--alpha-glutamyltyrosine	X-14205--alpha-glutamyltyrosine	0.1	0.00322835	0.00415886	39528	M36131.metal.pos.txt	Peptide	Dipeptide	Shin	1780	#N/A	975	0.0230157	Yes	No	No
1950		X-14205--alpha-glutamyltyrosine	X-14205--alpha-glutamyltyrosine	0.2	0.00174257	0.00478308	68519	M36131.metal.pos.txt	Peptide	Dipeptide	Shin	1780	#N/A	798	0.0151787	Yes	No	No
1951		X-14205--alpha-glutamyltyrosine	X-14205--alpha-glutamyltyrosine	0.3	0.00702232	0.00338332	93698	M36131.metal.pos.txt	Peptide	Dipeptide	Shin	1780	#N/A	1248	0.0391123	Yes	No	No
1952		X-14205--alpha-glutamyltyrosine	X-14205--alpha-glutamyltyrosine	0.4	0.00647469	0.00346366	115939	M36131.metal.pos.txt	Peptide	Dipeptide	Shin	1780	#N/A	1219	0.0369201	Yes	No	No
1953		X-14205--alpha-glutamyltyrosine	X-14205--alpha-glutamyltyrosine	0.5	0.00863525	0.00317958	135355	M36131.metal.pos.txt	Peptide	Dipeptide	Shin	1780	#N/A	1349	0.0444949	Yes	No	No
1954	normres_SDMA_imputed_complete_CHARGE.csv_TS_Oct2018.so_RAW.txt	symmetric dimethylarginine	symmetric dimethylarginine	0.001	0.0359705	0.00193599	942	normres_SDMA_imputed_complete_CHARGE.csv	Amino acid	Urea Cycle; Arginine And Proline Metabolism	Rhee	1671	HMDB0001539	2199	0.113702	No	No	No
1955		symmetric dimethylarginine	symmetric dimethylarginine	0.05	0.452217	8.6265e-06	25643	normres_SDMA_imputed_complete_CHARGE.csv	Amino acid	Urea Cycle; Arginine And Proline Metabolism	Rhee	1671	HMDB0001539	6595	0.476628	No	No	No
1956		symmetric dimethylarginine	symmetric dimethylarginine	0.1	0.417778	2.57864e-05	45471	normres_SDMA_imputed_complete_CHARGE.csv	Amino acid	Urea Cycle; Arginine And Proline Metabolism	Rhee	1671	HMDB0001539	6314	0.459927	No	No	No
1957		symmetric dimethylarginine	symmetric dimethylarginine	0.2	0.131757	0.000747893	79789	normres_SDMA_imputed_complete_CHARGE.csv	Amino acid	Urea Cycle; Arginine And Proline Metabolism	Rhee	1671	HMDB0001539	3689	0.248264	No	No	No
1958		symmetric dimethylarginine	symmetric dimethylarginine	0.3	0.190398	0.000459576	109793	normres_SDMA_imputed_complete_CHARGE.csv	Amino acid	Urea Cycle; Arginine And Proline Metabolism	Rhee	1671	HMDB0001539	4319	0.306427	No	No	No
1959		symmetric dimethylarginine	symmetric dimethylarginine	0.4	0.35666	8.07764e-05	136595	normres_SDMA_imputed_complete_CHARGE.csv	Amino acid	Urea Cycle; Arginine And Proline Metabolism	Rhee	1671	HMDB0001539	5816	0.426263	No	No	No
1960		symmetric dimethylarginine	symmetric dimethylarginine	0.5	0.294703	0.000174295	160354	normres_SDMA_imputed_complete_CHARGE.csv	Amino acid	Urea Cycle; Arginine And Proline Metabolism	Rhee	1671	HMDB0001539	5274	0.388412	No	No	No
1961	normres_Ratio_PC4006_LPC2206_imputed_complete_CHARGE.csv_TS_Oct2018.so_RAW.txt	ratio_pc4006_lpc2206	ratio_pc4006_lpc2206	0.001	0.186012	0.000443358	942	normres_Ratio_PC4006_LPC2206_imputed_complete_CHARGE.csv	Lipid	Lipid ratios	Rhee	1797	#N/A	4277	0.302308	No	No	No
1962		ratio_pc4006_lpc2206	ratio_pc4006_lpc2206	0.05	0.305768	0.000143531	25643	normres_Ratio_PC4006_LPC2206_imputed_complete_CHARGE.csv	Lipid	Lipid ratios	Rhee	1797	#N/A	5368	0.395938	No	No	No
1963		ratio_pc4006_lpc2206	ratio_pc4006_lpc2206	0.1	0.104703	0.000876368	45471	normres_Ratio_PC4006_LPC2206_imputed_complete_CHARGE.csv	Lipid	Lipid ratios	Rhee	1797	#N/A	3336	0.218163	No	No	No
1964		ratio_pc4006_lpc2206	ratio_pc4006_lpc2206	0.2	0.0328302	0.00188376	79790	normres_Ratio_PC4006_LPC2206_imputed_complete_CHARGE.csv	Lipid	Lipid ratios	Rhee	1797	#N/A	2111	0.108102	No	No	No
1965		ratio_pc4006_lpc2206	ratio_pc4006_lpc2206	0.3	0.0486397	0.00152893	109794	normres_Ratio_PC4006_LPC2206_imputed_complete_CHARGE.csv	Lipid	Lipid ratios	Rhee	1797	#N/A	2497	0.1354	No	No	No
1966		ratio_pc4006_lpc2206	ratio_pc4006_lpc2206	0.4	0.149657	0.000599293	136596	normres_Ratio_PC4006_LPC2206_imputed_complete_CHARGE.csv	Lipid	Lipid ratios	Rhee	1797	#N/A	3901	0.266666	No	No	No
1967		ratio_pc4006_lpc2206	ratio_pc4006_lpc2206	0.5	0.157705	0.000560712	160355	normres_Ratio_PC4006_LPC2206_imputed_complete_CHARGE.csv	Lipid	Lipid ratios	Rhee	1797	#N/A	3986	0.275015	No	No	No
1968	M36009	X-14086	X-14086	0.001	0.199922	0.000267333	856	M36009.metal.pos.txt	Unknown	Unknown	Shin	2651	#N/A	4414	0.31483	No	No	No
1969		X-14086	X-14086	0.05	0.0608949	0.000902705	22465	M36009.metal.pos.txt	Unknown	Unknown	Shin	2651	#N/A	2734	0.154821	No	No	No
1970		X-14086	X-14086	0.1	0.0753972	0.000778345	39527	M36009.metal.pos.txt	Unknown	Unknown	Shin	2651	#N/A	2951	0.177596	No	No	No
1971		X-14086	X-14086	0.2	0.0291766	0.00135087	68524	M36009.metal.pos.txt	Unknown	Unknown	Shin	2651	#N/A	2027	0.100053	No	No	No
1972		X-14086	X-14086	0.3	0.00872447	0.00212925	93695	M36009.metal.pos.txt	Unknown	Unknown	Shin	2651	#N/A	1357	0.0446896	Yes	No	No
1973		X-14086	X-14086	0.4	0.00402209	0.00264591	115942	M36009.metal.pos.txt	Unknown	Unknown	Shin	2651	#N/A	1057	0.0264499	Yes	No	No
1974		X-14086	X-14086	0.5	0.00333981	0.00277139	135374	M36009.metal.pos.txt	Unknown	Unknown	Shin	2651	#N/A	987	0.0235208	Yes	No	No
1975	normres_UDP_galactose_glucose_imputed_complete_CHARGE.csv_TS_Oct2018.so_RAW.txt	uridine diphosphate glucose; uridine diphosphate galactose	uridine diphosphate glucose; uridine diphosphate galactose	0.001	0.211868	0.000454392	942	normres_UDP_galactose_glucose_imputed_complete_CHARGE.csv	Nucleotide	Pyrimidine Metabolism, Uracil Containing	Rhee	1408	#N/A	4515	0.326178	No	No	No
1976		uridine diphosphate glucose; uridine diphosphate galactose	uridine diphosphate glucose; uridine diphosphate galactose	0.05	0.168776	0.000652987	25642	normres_UDP_galactose_glucose_imputed_complete_CHARGE.csv	Nucleotide	Pyrimidine Metabolism, Uracil Containing	Rhee	1408	#N/A	4104	0.285858	No	No	No
1977		uridine diphosphate glucose; uridine diphosphate galactose	uridine diphosphate glucose; uridine diphosphate galactose	0.1	0.170994	0.000641105	45470	normres_UDP_galactose_glucose_imputed_complete_CHARGE.csv	Nucleotide	Pyrimidine Metabolism, Uracil Containing	Rhee	1408	#N/A	4126	0.288071	No	No	No
1978		uridine diphosphate glucose; uridine diphosphate galactose	uridine diphosphate glucose; uridine diphosphate galactose	0.2	0.111011	0.00105857	79787	normres_UDP_galactose_glucose_imputed_complete_CHARGE.csv	Nucleotide	Pyrimidine Metabolism, Uracil Containing	Rhee	1408	#N/A	3418	0.225757	No	No	No
1979		uridine diphosphate glucose; uridine diphosphate galactose	uridine diphosphate glucose; uridine diphosphate galactose	0.3	0.0618653	0.00168143	109791	normres_UDP_galactose_glucose_imputed_complete_CHARGE.csv	Nucleotide	Pyrimidine Metabolism, Uracil Containing	Rhee	1408	#N/A	2754	0.156146	No	No	No
1980		uridine diphosphate glucose; uridine diphosphate galactose	uridine diphosphate glucose; uridine diphosphate galactose	0.4	0.102127	0.00114401	136592	normres_UDP_galactose_glucose_imputed_complete_CHARGE.csv	Nucleotide	Pyrimidine Metabolism, Uracil Containing	Rhee	1408	#N/A	3310	0.214467	No	No	No
1981		uridine diphosphate glucose; uridine diphosphate galactose	uridine diphosphate glucose; uridine diphosphate galactose	0.5	0.133977	0.000871202	160350	normres_UDP_galactose_glucose_imputed_complete_CHARGE.csv	Nucleotide	Pyrimidine Metabolism, Uracil Containing	Rhee	1408	#N/A	3716	0.250613	No	No	No
1982	M01302	methionine	Met	0.001	0.146752	0.000150183	856	M01302.metal.pos.txt	Amino acid	Methionine, Cysteine, SAM and Taurine Metabolism	Shin	7347	HMDB0000696	3861	0.2642	No	No	No
1983		methionine	Met	0.05	0.105655	0.00021264	22462	M01302.metal.pos.txt	Amino acid	Methionine, Cysteine, SAM and Taurine Metabolism	Shin	7347	HMDB0000696	3349	0.219292	No	No	No
1984		methionine	Met	0.1	0.0585867	0.000334054	39524	M01302.metal.pos.txt	Amino acid	Methionine, Cysteine, SAM and Taurine Metabolism	Shin	7347	HMDB0000696	2695	0.151108	No	No	No
1985		methionine	Met	0.2	0.0948735	0.000234025	68519	M01302.metal.pos.txt	Amino acid	Methionine, Cysteine, SAM and Taurine Metabolism	Shin	7347	HMDB0000696	3208	0.205569	No	No	No
1986		methionine	Met	0.3	0.177974	0.000115978	93694	M01302.metal.pos.txt	Amino acid	Methionine, Cysteine, SAM and Taurine Metabolism	Shin	7347	HMDB0000696	4191	0.295179	No	No	No
1987		methionine	Met	0.4	0.200678	9.58526e-05	115946	M01302.metal.pos.txt	Amino acid	Methionine, Cysteine, SAM and Taurine Metabolism	Shin	7347	HMDB0000696	4424	0.315305	No	No	No
1988		methionine	Met	0.5	0.203997	9.3182e-05	135382	M01302.metal.pos.txt	Amino acid	Methionine, Cysteine, SAM and Taurine Metabolism	Shin	7347	HMDB0000696	4448	0.318791	No	No	No
1989	Summary_statistics_MAGNETIC_IDL.P.txt_TS_Oct2018.so_RAW.txt	concentration,of,idl,particles	IDL.P	0.001	0.0571834	0.000129334	2242	Summary_statistics_MAGNETIC_IDL.P.txt	Lipid	Lipid ratios	Kettunen	19273	#N/A	2671	0.148814	No	No	No
1990		concentration,of,idl,particles	IDL.P	0.05	0.00847024	0.000295838	68619	Summary_statistics_MAGNETIC_IDL.P.txt	Lipid	Lipid ratios	Kettunen	19273	#N/A	1342	0.0438723	Yes	No	No
1991		concentration,of,idl,particles	IDL.P	0.1	3.43125e-05	0.000821972	124293	Summary_statistics_MAGNETIC_IDL.P.txt	Lipid	Lipid ratios	Kettunen	19273	#N/A	204	0.00116915	Yes	Yes	No
1992		concentration,of,idl,particles	IDL.P	0.2	9.78103e-06	0.000945511	223381	Summary_statistics_MAGNETIC_IDL.P.txt	Lipid	Lipid ratios	Kettunen	19273	#N/A	116	0.000586103	Yes	Yes	No
1993		concentration,of,idl,particles	IDL.P	0.3	2.60697e-05	0.000848946	310903	Summary_statistics_MAGNETIC_IDL.P.txt	Lipid	Lipid ratios	Kettunen	19273	#N/A	175	0.00103549	Yes	Yes	No
1994		concentration,of,idl,particles	IDL.P	0.4	1.59572e-05	0.000897239	390060	Summary_statistics_MAGNETIC_IDL.P.txt	Lipid	Lipid ratios	Kettunen	19273	#N/A	145	0.000764955	Yes	Yes	No
1995		concentration,of,idl,particles	IDL.P	0.5	3.73074e-05	0.000813765	460877	Summary_statistics_MAGNETIC_IDL.P.txt	Lipid	Lipid ratios	Kettunen	19273	#N/A	206	0.00125885	Yes	Yes	No
1996	M33150	X-11805	X-11805	0.001	0.312468	8.6057e-05	856	M33150.metal.pos.txt	Unknown	Unknown	Shin	2777	#N/A	5418	0.40088	No	No	No
1997		X-11805	X-11805	0.05	0.206221	0.00024187	22465	M33150.metal.pos.txt	Unknown	Unknown	Shin	2777	#N/A	4473	0.320465	No	No	No
1998		X-11805	X-11805	0.1	0.364587	4.31646e-05	39529	M33150.metal.pos.txt	Unknown	Unknown	Shin	2777	#N/A	5878	0.431141	No	No	No
1999		X-11805	X-11805	0.2	0.493774	8.77127e-08	68522	M33150.metal.pos.txt	Unknown	Unknown	Shin	2777	#N/A	6908	0.496848	No	No	No
[truncated: 4,952 more rows]

## Sheet: Table S4-b
Order	biochemical_name	Biochemical name	Thresh	P-value	R2	N SNPs	Superpathway	Pathway	study_met_id	GWAS	N GWAS	HMDB	Rank	FDR P-value	FDR 0.05	FDR 0.01	Bonferroni 0.05
1	2-aminophenol sulfate	2-aminophenol sulfate	0.001	0.201923	0.00251253	1602	Xenobiotics	Chemical	X43266	Panyard	291	HMDB61116	1306	0.365811	No	No	No
2		2-aminophenol sulfate	0.05	0.353393	0.000510731	44450	Xenobiotics	Chemical	X43266	Panyard	291	HMDB61116	1866	0.448086	No	No	No
3		2-aminophenol sulfate	0.1	0.350851	0.000529486	78890	Xenobiotics	Chemical	X43266	Panyard	291	HMDB61116	1854	0.447743	No	No	No
4		2-aminophenol sulfate	0.2	0.468644	2.23483e-05	139058	Xenobiotics	Chemical	X43266	Panyard	291	HMDB61116	2257	0.491276	No	No	No
5		2-aminophenol sulfate	0.3	0.454252	4.76799e-05	190630	Xenobiotics	Chemical	X43266	Panyard	291	HMDB61116	2207	0.486978	No	No	No
6		2-aminophenol sulfate	0.4	0.444919	6.92578e-05	236737	Xenobiotics	Chemical	X43266	Panyard	291	HMDB61116	2171	0.484881	No	No	No
7		2-aminophenol sulfate	0.5	0.44499	6.90784e-05	277232	Xenobiotics	Chemical	X43266	Panyard	291	HMDB61116	2172	0.484735	No	No	No
8	pipecolate	pipecolate	0.001	0.189432	0.00265758	1602	Amino Acid	Lysine Metabolism	X1444	Panyard	291	HMDB00070	1246	0.359708	No	No	No
9		pipecolate	0.05	0.00963274	0.0186462	44504	Amino Acid	Lysine Metabolism	X1444	Panyard	291	HMDB00070	200	0.113955	No	No	No
10		pipecolate	0.1	0.0978259	0.0057379	78994	Amino Acid	Lysine Metabolism	X1444	Panyard	291	HMDB00070	806	0.287166	No	No	No
11		pipecolate	0.2	0.0662999	0.00774238	139259	Amino Acid	Lysine Metabolism	X1444	Panyard	291	HMDB00070	596	0.263197	No	No	No
12		pipecolate	0.3	0.0430595	0.0100708	190914	Amino Acid	Lysine Metabolism	X1444	Panyard	291	HMDB00070	451	0.225895	No	No	No
13		pipecolate	0.4	0.0912343	0.0060893	237081	Amino Acid	Lysine Metabolism	X1444	Panyard	291	HMDB00070	758	0.284776	No	No	No
14		pipecolate	0.5	0.113782	0.004991	277618	Amino Acid	Lysine Metabolism	X1444	Panyard	291	HMDB00070	877	0.306966	No	No	No
15	pyruvate	pyruvate	0.001	0.163374	0.00329951	1602	Carbohydrate	Glycolysis, Gluconeogenesis, and Pyruvate Metabolism	X22250	Panyard	291	HMDB00243	1131	0.341771	No	No	No
16		pyruvate	0.05	0.0708456	0.00739348	44504	Carbohydrate	Glycolysis, Gluconeogenesis, and Pyruvate Metabolism	X22250	Panyard	291	HMDB00243	635	0.26397	No	No	No
17		pyruvate	0.1	0.135984	0.00413849	78994	Carbohydrate	Glycolysis, Gluconeogenesis, and Pyruvate Metabolism	X22250	Panyard	291	HMDB00243	991	0.324659	No	No	No
18		pyruvate	0.2	0.247389	0.00160051	139259	Carbohydrate	Glycolysis, Gluconeogenesis, and Pyruvate Metabolism	X22250	Panyard	291	HMDB00243	1502	0.389695	No	No	No
19		pyruvate	0.3	0.102075	0.00552567	190914	Carbohydrate	Glycolysis, Gluconeogenesis, and Pyruvate Metabolism	X22250	Panyard	291	HMDB00243	825	0.29274	No	No	No
20		pyruvate	0.4	0.0833752	0.00654863	237081	Carbohydrate	Glycolysis, Gluconeogenesis, and Pyruvate Metabolism	X22250	Panyard	291	HMDB00243	712	0.277059	No	No	No
21		pyruvate	0.5	0.0807376	0.00671398	277618	Carbohydrate	Glycolysis, Gluconeogenesis, and Pyruvate Metabolism	X22250	Panyard	291	HMDB00243	699	0.273284	No	No	No
22	ornithine	ornithine	0.001	0.126032	0.00449786	1602	Amino Acid	Urea cycle; Arginine and Proline Metabolism	X1493	Panyard	291	HMDB03374	944	0.315881	No	No	No
23		ornithine	0.05	0.343679	0.000556411	44504	Amino Acid	Urea cycle; Arginine and Proline Metabolism	X1493	Panyard	291	HMDB03374	1832	0.443856	No	No	No
24		ornithine	0.1	0.209843	0.00223528	78994	Amino Acid	Urea cycle; Arginine and Proline Metabolism	X1493	Panyard	291	HMDB03374	1349	0.368042	No	No	No
25		ornithine	0.2	0.215506	0.00212865	139259	Amino Acid	Urea cycle; Arginine and Proline Metabolism	X1493	Panyard	291	HMDB03374	1384	0.368415	No	No	No
26		ornithine	0.3	0.37901	0.000326112	190914	Amino Acid	Urea cycle; Arginine and Proline Metabolism	X1493	Panyard	291	HMDB03374	1938	0.462713	No	No	No
27		ornithine	0.4	0.436244	8.85172e-05	237081	Amino Acid	Urea cycle; Arginine and Proline Metabolism	X1493	Panyard	291	HMDB03374	2140	0.482315	No	No	No
28		ornithine	0.5	0.472208	1.67037e-05	277618	Amino Acid	Urea cycle; Arginine and Proline Metabolism	X1493	Panyard	291	HMDB03374	2267	0.49283	No	No	No
29	gamma-glutamylglutamine	gamma-glutamylglutamine	0.001	0.310256	0.000842079	1602	Peptide	Gamma-glutamyl Amino Acid	X2730	Panyard	291	HMDB11738	1724	0.425792	No	No	No
30		gamma-glutamylglutamine	0.05	0.322909	0.000725554	44504	Peptide	Gamma-glutamyl Amino Acid	X2730	Panyard	291	HMDB11738	1767	0.432373	No	No	No
31		gamma-glutamylglutamine	0.1	0.374913	0.000349346	78994	Peptide	Gamma-glutamyl Amino Acid	X2730	Panyard	291	HMDB11738	1925	0.460802	No	No	No
32		gamma-glutamylglutamine	0.2	0.278127	0.00118909	139259	Peptide	Gamma-glutamyl Amino Acid	X2730	Panyard	291	HMDB11738	1608	0.409235	No	No	No
33		gamma-glutamylglutamine	0.3	0.324772	0.000709283	190914	Peptide	Gamma-glutamyl Amino Acid	X2730	Panyard	291	HMDB11738	1776	0.432664	No	No	No
34		gamma-glutamylglutamine	0.4	0.174379	0.00301253	237081	Peptide	Gamma-glutamyl Amino Acid	X2730	Panyard	291	HMDB11738	1183	0.348759	No	No	No
35		gamma-glutamylglutamine	0.5	0.260077	0.00142026	277618	Peptide	Gamma-glutamyl Amino Acid	X2730	Panyard	291	HMDB11738	1549	0.397251	No	No	No
36	myo-inositol	myo-inositol	0.001	0.417277	0.000149899	1602	Lipid	Inositol Metabolism	X1124	Panyard	291	HMDB00211	2060	0.479261	No	No	No
37		myo-inositol	0.05	0.227747	0.00191207	44504	Lipid	Inositol Metabolism	X1124	Panyard	291	HMDB00211	1420	0.379471	No	No	No
38		myo-inositol	0.1	0.384929	0.000294086	78994	Lipid	Inositol Metabolism	X1124	Panyard	291	HMDB00211	1961	0.464427	No	No	No
39		myo-inositol	0.2	0.267805	0.00131782	139259	Lipid	Inositol Metabolism	X1124	Panyard	291	HMDB00211	1576	0.402047	No	No	No
40		myo-inositol	0.3	0.117406	0.00483869	190914	Lipid	Inositol Metabolism	X1124	Panyard	291	HMDB00211	896	0.310025	No	No	No
41		myo-inositol	0.4	0.174797	0.00300213	237081	Lipid	Inositol Metabolism	X1124	Panyard	291	HMDB00211	1187	0.348415	No	No	No
42		myo-inositol	0.5	0.193695	0.00256412	277618	Lipid	Inositol Metabolism	X1124	Panyard	291	HMDB00211	1267	0.361707	No	No	No
43	erythritol	erythritol	0.001	0.0237738	0.0134005	1602	Xenobiotics	Food Component/Plant	X20699	Panyard	291	HMDB02994	325	0.173073	No	No	No
44		erythritol	0.05	0.12772	0.00443448	44504	Xenobiotics	Food Component/Plant	X20699	Panyard	291	HMDB02994	953	0.317089	No	No	No
45		erythritol	0.1	0.0375418	0.0108284	78994	Xenobiotics	Food Component/Plant	X20699	Panyard	291	HMDB02994	422	0.210483	No	No	No
46		erythritol	0.2	0.0478236	0.00949643	139259	Xenobiotics	Food Component/Plant	X20699	Panyard	291	HMDB02994	486	0.23282	No	No	No
47		erythritol	0.3	0.105843	0.005346	190914	Xenobiotics	Food Component/Plant	X20699	Panyard	291	HMDB02994	840	0.298124	No	No	No
48		erythritol	0.4	0.0768025	0.00697242	237081	Xenobiotics	Food Component/Plant	X20699	Panyard	291	HMDB02994	668	0.272028	No	No	No
49		erythritol	0.5	0.0573483	0.00851436	277618	Xenobiotics	Food Component/Plant	X20699	Panyard	291	HMDB02994	541	0.250806	No	No	No
50	benzoate	benzoate	0.001	0.292892	0.00104149	1602	Xenobiotics	Benzoate Metabolism	X15778	Panyard	291	HMDB01870	1672	0.414463	No	No	No
51		benzoate	0.05	0.00375003	0.0247726	44489	Xenobiotics	Benzoate Metabolism	X15778	Panyard	291	HMDB01870	112	0.0792194	No	No	No
52		benzoate	0.1	0.00941245	0.0191742	78964	Xenobiotics	Benzoate Metabolism	X15778	Panyard	291	HMDB01870	195	0.114204	No	No	No
53		benzoate	0.2	0.0240264	0.0136192	139211	Xenobiotics	Benzoate Metabolism	X15778	Panyard	291	HMDB01870	327	0.173842	No	No	No
54		benzoate	0.3	0.00308155	0.0259793	190844	Xenobiotics	Benzoate Metabolism	X15778	Panyard	291	HMDB01870	99	0.073646	No	No	No
55		benzoate	0.4	0.00389107	0.0245461	236977	Xenobiotics	Benzoate Metabolism	X15778	Panyard	291	HMDB01870	113	0.0814714	No	No	No
56		benzoate	0.5	0.00276889	0.0266383	277503	Xenobiotics	Benzoate Metabolism	X15778	Panyard	291	HMDB01870	93	0.070443	No	No	No
57	alanine	alanine	0.001	0.275626	0.00121946	1602	Amino Acid	Alanine and Aspartate Metabolism	X1126	Panyard	291	HMDB00161	1599	0.407836	No	No	No
58		alanine	0.05	0.0620632	0.00809239	44504	Amino Acid	Alanine and Aspartate Metabolism	X1126	Panyard	291	HMDB00161	566	0.259437	No	No	No
59		alanine	0.1	0.0796822	0.00678187	78994	Amino Acid	Alanine and Aspartate Metabolism	X1126	Panyard	291	HMDB00161	687	0.274422	No	No	No
60		alanine	0.2	0.112265	0.00505652	139259	Amino Acid	Alanine and Aspartate Metabolism	X1126	Panyard	291	HMDB00161	868	0.306013	No	No	No
61		alanine	0.3	0.178447	0.00291255	190914	Amino Acid	Alanine and Aspartate Metabolism	X1126	Panyard	291	HMDB00161	1199	0.352132	No	No	No
62		alanine	0.4	0.223165	0.00199099	237081	Amino Acid	Alanine and Aspartate Metabolism	X1126	Panyard	291	HMDB00161	1406	0.375539	No	No	No
63		alanine	0.5	0.292406	0.00102531	277618	Amino Acid	Alanine and Aspartate Metabolism	X1126	Panyard	291	HMDB00161	1670	0.414271	No	No	No
64	1-stearoyl-2-linoleoyl-GPC (18:0/18:2)*	1-stearoyl-2-linoleoyl-GPC (18:0/18:2)*	0.001	0.36822	0.000389202	1602	Lipid	Phosphatidylcholine (PC)	X52452	Panyard	291	HMDB08039	1900	0.458531	No	No	No
65		1-stearoyl-2-linoleoyl-GPC (18:0/18:2)*	0.05	0.202574	0.0023786	44504	Lipid	Phosphatidylcholine (PC)	X52452	Panyard	291	HMDB08039	1309	0.366149	No	No	No
66		1-stearoyl-2-linoleoyl-GPC (18:0/18:2)*	0.1	0.206548	0.00229932	78994	Lipid	Phosphatidylcholine (PC)	X52452	Panyard	291	HMDB08039	1329	0.367715	No	No	No
67		1-stearoyl-2-linoleoyl-GPC (18:0/18:2)*	0.2	0.167551	0.00318762	139259	Lipid	Phosphatidylcholine (PC)	X52452	Panyard	291	HMDB08039	1143	0.346829	No	No	No
68		1-stearoyl-2-linoleoyl-GPC (18:0/18:2)*	0.3	0.0651418	0.00783554	190914	Lipid	Phosphatidylcholine (PC)	X52452	Panyard	291	HMDB08039	586	0.263013	No	No	No
69		1-stearoyl-2-linoleoyl-GPC (18:0/18:2)*	0.4	0.0449845	0.00983084	237081	Lipid	Phosphatidylcholine (PC)	X52452	Panyard	291	HMDB08039	474	0.224543	No	No	No
70		1-stearoyl-2-linoleoyl-GPC (18:0/18:2)*	0.5	0.108817	0.0052094	277618	Lipid	Phosphatidylcholine (PC)	X52452	Panyard	291	HMDB08039	854	0.301478	No	No	No
71	sulfate*	sulfate*	0.001	0.412308	0.000168755	1602	Xenobiotics	Chemical	X46960	Panyard	291	HMDB01448	2045	0.477027	No	No	No
72		sulfate*	0.05	0.456238	4.15172e-05	44504	Xenobiotics	Chemical	X46960	Panyard	291	HMDB01448	2214	0.48756	No	No	No
73		sulfate*	0.1	0.449618	5.50997e-05	78994	Xenobiotics	Chemical	X46960	Panyard	291	HMDB01448	2188	0.486195	No	No	No
74		sulfate*	0.2	0.326464	0.000694699	139259	Xenobiotics	Chemical	X46960	Panyard	291	HMDB01448	1783	0.433211	No	No	No
75		sulfate*	0.3	0.289356	0.00105896	190914	Xenobiotics	Chemical	X46960	Panyard	291	HMDB01448	1652	0.414417	No	No	No
76		sulfate*	0.4	0.293517	0.00101323	237081	Xenobiotics	Chemical	X46960	Panyard	291	HMDB01448	1674	0.414851	No	No	No
77		sulfate*	0.5	0.302432	0.00091958	277618	Xenobiotics	Chemical	X46960	Panyard	291	HMDB01448	1704	0.419927	No	No	No
78	N1-Methyl-2-pyridone-5-carboxamide	N1-Methyl-2-pyridone-5-carboxamide	0.001	0.169348	0.00314064	1602	Cofactors and Vitamins	Nicotinate and Nicotinamide Metabolism	X40469	Panyard	291	HMDB04193	1156	0.346606	No	No	No
79		N1-Methyl-2-pyridone-5-carboxamide	0.05	0.409664	0.000179264	44504	Cofactors and Vitamins	Nicotinate and Nicotinamide Metabolism	X40469	Panyard	291	HMDB04193	2032	0.477001	No	No	No
80		N1-Methyl-2-pyridone-5-carboxamide	0.1	0.340412	0.00058127	78994	Cofactors and Vitamins	Nicotinate and Nicotinamide Metabolism	X40469	Panyard	291	HMDB04193	1825	0.441324	No	No	No
81		N1-Methyl-2-pyridone-5-carboxamide	0.2	0.448487	5.76139e-05	139259	Cofactors and Vitamins	Nicotinate and Nicotinamide Metabolism	X40469	Panyard	291	HMDB04193	2183	0.486084	No	No	No
82		N1-Methyl-2-pyridone-5-carboxamide	0.3	0.476637	1.17991e-05	190914	Cofactors and Vitamins	Nicotinate and Nicotinamide Metabolism	X40469	Panyard	291	HMDB04193	2285	0.493533	No	No	No
83		N1-Methyl-2-pyridone-5-carboxamide	0.4	0.439613	7.9341e-05	237081	Cofactors and Vitamins	Nicotinate and Nicotinamide Metabolism	X40469	Panyard	291	HMDB04193	2151	0.483554	No	No	No
84		N1-Methyl-2-pyridone-5-carboxamide	0.5	0.449422	5.55314e-05	277618	Cofactors and Vitamins	Nicotinate and Nicotinamide Metabolism	X40469	Panyard	291	HMDB04193	2186	0.486428	No	No	No
85	argininate*	argininate*	0.001	0.0626465	0.00804266	1602	Amino Acid	Urea cycle; Arginine and Proline Metabolism	X57461	Panyard	291	HMDB03148	570	0.260038	No	No	No
86		argininate*	0.05	0.26803	0.00131491	44504	Amino Acid	Urea cycle; Arginine and Proline Metabolism	X57461	Panyard	291	HMDB03148	1577	0.402131	No	No	No
87		argininate*	0.1	0.258673	0.00143945	78994	Amino Acid	Urea cycle; Arginine and Proline Metabolism	X57461	Panyard	291	HMDB03148	1546	0.395873	No	No	No
88		argininate*	0.2	0.22613	0.00193964	139259	Amino Acid	Urea cycle; Arginine and Proline Metabolism	X57461	Panyard	291	HMDB03148	1417	0.377575	No	No	No
89		argininate*	0.3	0.444252	6.75422e-05	190914	Amino Acid	Urea cycle; Arginine and Proline Metabolism	X57461	Panyard	291	HMDB03148	2168	0.484825	No	No	No
90		argininate*	0.4	0.424375	0.000124981	237081	Amino Acid	Urea cycle; Arginine and Proline Metabolism	X57461	Panyard	291	HMDB03148	2088	0.480877	No	No	No
91		argininate*	0.5	0.440903	7.59616e-05	277618	Amino Acid	Urea cycle; Arginine and Proline Metabolism	X57461	Panyard	291	HMDB03148	2154	0.484298	No	No	No
92	kynurenine	kynurenine	0.001	0.0190859	0.014659	1602	Amino Acid	Tryptophan Metabolism	X15140	Panyard	291	HMDB00684	289	0.156253	No	No	No
93		kynurenine	0.05	0.231298	0.00185261	44504	Amino Acid	Tryptophan Metabolism	X15140	Panyard	291	HMDB00684	1433	0.381891	No	No	No
94		kynurenine	0.1	0.387674	0.000279841	78994	Amino Acid	Tryptophan Metabolism	X15140	Panyard	291	HMDB00684	1966	0.46655	No	No	No
95		kynurenine	0.2	0.305272	0.000890957	139259	Amino Acid	Tryptophan Metabolism	X15140	Panyard	291	HMDB00684	1710	0.422382	No	No	No
96		kynurenine	0.3	0.164511	0.00326867	190914	Amino Acid	Tryptophan Metabolism	X15140	Panyard	291	HMDB00684	1135	0.342938	No	No	No
97		kynurenine	0.4	0.135195	0.00416576	237081	Amino Acid	Tryptophan Metabolism	X15140	Panyard	291	HMDB00684	985	0.324742	No	No	No
98		kynurenine	0.5	0.13661	0.00411696	277618	Amino Acid	Tryptophan Metabolism	X15140	Panyard	291	HMDB00684	996	0.324517	No	No	No
99	X - 24686	X - 24686	0.001	0.068356	0.00758137	1602	Unknown	Unknown	X53114	Panyard	291	#N/A	612	0.264265	No	No	No
100		X - 24686	0.05	0.0816714	0.00665475	44504	Unknown	Unknown	X53114	Panyard	291	#N/A	705	0.274092	No	No	No
101		X - 24686	0.1	0.0130733	0.016854	78994	Unknown	Unknown	X53114	Panyard	291	#N/A	233	0.132753	No	No	No
102		X - 24686	0.2	0.00286969	0.0258804	139259	Unknown	Unknown	X53114	Panyard	291	#N/A	95	0.0714704	No	No	No
103		X - 24686	0.3	0.00137897	0.0303247	190914	Unknown	Unknown	X53114	Panyard	291	#N/A	57	0.0572395	No	No	No
104		X - 24686	0.4	0.000760187	0.033959	237081	Unknown	Unknown	X53114	Panyard	291	#N/A	39	0.046118	Yes	No	No
105		X - 24686	0.5	0.00124545	0.030945	277618	Unknown	Unknown	X53114	Panyard	291	#N/A	51	0.0577792	No	No	No
106	hydroxyasparagine**	hydroxyasparagine**	0.001	0.0293329	0.0122091	1602	Amino Acid	Alanine and Aspartate Metabolism	X62060	Panyard	291	HMDB32332	360	0.192782	No	No	No
107		hydroxyasparagine**	0.05	0.0600425	0.00826876	44504	Amino Acid	Alanine and Aspartate Metabolism	X62060	Panyard	291	HMDB32332	558	0.254589	No	No	No
108		hydroxyasparagine**	0.1	0.0742443	0.00714859	78994	Amino Acid	Alanine and Aspartate Metabolism	X62060	Panyard	291	HMDB32332	651	0.269834	No	No	No
109		hydroxyasparagine**	0.2	0.0905393	0.00612805	139259	Amino Acid	Alanine and Aspartate Metabolism	X62060	Panyard	291	HMDB32332	751	0.285241	No	No	No
110		hydroxyasparagine**	0.3	0.162486	0.00332379	190914	Amino Acid	Alanine and Aspartate Metabolism	X62060	Panyard	291	HMDB32332	1127	0.341119	No	No	No
111		hydroxyasparagine**	0.4	0.0625621	0.00804982	237081	Amino Acid	Alanine and Aspartate Metabolism	X62060	Panyard	291	HMDB32332	569	0.260144	No	No	No
112		hydroxyasparagine**	0.5	0.0599409	0.00827779	277618	Amino Acid	Alanine and Aspartate Metabolism	X62060	Panyard	291	HMDB32332	557	0.254614	No	No	No
113	X - 21733	X - 21733	0.001	0.140015	0.00400208	1602	Unknown	Unknown	X46902	Panyard	291	#N/A	1020	0.32478	No	No	No
114		X - 21733	0.05	0.172391	0.00306256	44504	Unknown	Unknown	X46902	Panyard	291	#N/A	1172	0.348017	No	No	No
115		X - 21733	0.1	0.120952	0.00469501	78994	Unknown	Unknown	X46902	Panyard	291	#N/A	918	0.311734	No	No	No
116		X - 21733	0.2	0.0921955	0.00603626	139259	Unknown	Unknown	X46902	Panyard	291	#N/A	765	0.285143	No	No	No
117		X - 21733	0.3	0.0643317	0.0079018	190914	Unknown	Unknown	X46902	Panyard	291	#N/A	581	0.261977	No	No	No
118		X - 21733	0.4	0.0649139	0.00785409	237081	Unknown	Unknown	X46902	Panyard	291	#N/A	584	0.26299	No	No	No
119		X - 21733	0.5	0.0364529	0.0109919	277618	Unknown	Unknown	X46902	Panyard	291	#N/A	415	0.207825	No	No	No
120	N-acetylglucosamine/N-acetylgalactosamine	N-acetylglucosamine/N-acetylgalactosamine	0.001	0.0428997	0.0100913	1602	Carbohydrate	Aminosugar Metabolism	X46539	Panyard	291	HMDB00215	450	0.225557	No	No	No
121		N-acetylglucosamine/N-acetylgalactosamine	0.05	0.369269	0.000382798	44504	Carbohydrate	Aminosugar Metabolism	X46539	Panyard	291	HMDB00215	1907	0.458149	No	No	No
122		N-acetylglucosamine/N-acetylgalactosamine	0.1	0.103428	0.00546029	78994	Carbohydrate	Aminosugar Metabolism	X46539	Panyard	291	HMDB00215	831	0.294477	No	No	No
123		N-acetylglucosamine/N-acetylgalactosamine	0.2	0.0557079	0.00867018	139259	Carbohydrate	Aminosugar Metabolism	X46539	Panyard	291	HMDB00215	532	0.247754	No	No	No
124		N-acetylglucosamine/N-acetylgalactosamine	0.3	0.0992522	0.00566548	190914	Carbohydrate	Aminosugar Metabolism	X46539	Panyard	291	HMDB00215	814	0.28849	No	No	No
125		N-acetylglucosamine/N-acetylgalactosamine	0.4	0.0800198	0.00676004	237081	Carbohydrate	Aminosugar Metabolism	X46539	Panyard	291	HMDB00215	689	0.274785	No	No	No
126		N-acetylglucosamine/N-acetylgalactosamine	0.5	0.0469124	0.00960136	277618	Carbohydrate	Aminosugar Metabolism	X46539	Panyard	291	HMDB00215	480	0.231239	No	No	No
127	pseudouridine	pseudouridine	0.001	0.494947	5.5131e-07	1602	Nucleotide	Pyrimidine Metabolism, Uracil containing	X33442	Panyard	291	HMDB00767	2357	0.496837	No	No	No
128		pseudouridine	0.05	0.31067	0.0008381	44504	Nucleotide	Pyrimidine Metabolism, Uracil containing	X33442	Panyard	291	HMDB00767	1727	0.425619	No	No	No
129		pseudouridine	0.1	0.0973586	0.0057619	78994	Nucleotide	Pyrimidine Metabolism, Uracil containing	X33442	Panyard	291	HMDB00767	799	0.288298	No	No	No
130		pseudouridine	0.2	0.0548675	0.00875197	139259	Nucleotide	Pyrimidine Metabolism, Uracil containing	X33442	Panyard	291	HMDB00767	525	0.24727	No	No	No
131		pseudouridine	0.3	0.0769752	0.00696077	190914	Nucleotide	Pyrimidine Metabolism, Uracil containing	X33442	Panyard	291	HMDB00767	670	0.271826	No	No	No
132		pseudouridine	0.4	0.105908	0.00534296	237081	Nucleotide	Pyrimidine Metabolism, Uracil containing	X33442	Panyard	291	HMDB00767	841	0.297953	No	No	No
133		pseudouridine	0.5	0.0743417	0.00714175	277618	Nucleotide	Pyrimidine Metabolism, Uracil containing	X33442	Panyard	291	HMDB00767	652	0.269774	No	No	No
134	C-glycosyltryptophan	C-glycosyltryptophan	0.001	0.225739	0.00194634	1602	Amino Acid	Tryptophan Metabolism	X48782	Panyard	291	#N/A	1415	0.377455	No	No	No
135		C-glycosyltryptophan	0.05	0.209434	0.00224316	44504	Amino Acid	Tryptophan Metabolism	X48782	Panyard	291	#N/A	1347	0.367869	No	No	No
136		C-glycosyltryptophan	0.1	0.292736	0.00102171	78994	Amino Acid	Tryptophan Metabolism	X48782	Panyard	291	#N/A	1671	0.414491	No	No	No
137		C-glycosyltryptophan	0.2	0.464105	2.78951e-05	139259	Amino Acid	Tryptophan Metabolism	X48782	Panyard	291	#N/A	2241	0.489992	No	No	No
138		C-glycosyltryptophan	0.3	0.457615	3.89343e-05	190914	Amino Acid	Tryptophan Metabolism	X48782	Panyard	291	#N/A	2218	0.488151	No	No	No
139		C-glycosyltryptophan	0.4	0.44609	6.31339e-05	237081	Amino Acid	Tryptophan Metabolism	X48782	Panyard	291	#N/A	2173	0.485711	No	No	No
140		C-glycosyltryptophan	0.5	0.473286	1.54317e-05	277618	Amino Acid	Tryptophan Metabolism	X48782	Panyard	291	#N/A	2273	0.492651	No	No	No
141	1-ribosyl-imidazoleacetate*	1-ribosyl-imidazoleacetate*	0.001	0.094248	0.0059251	1602	Amino Acid	Histidine Metabolism	X61868	Panyard	291	HMDB02331	786	0.283703	No	No	No
142		1-ribosyl-imidazoleacetate*	0.05	0.410975	0.00017401	44504	Amino Acid	Histidine Metabolism	X61868	Panyard	291	HMDB02331	2036	0.477587	No	No	No
143		1-ribosyl-imidazoleacetate*	0.1	0.11117	0.00510447	78994	Amino Acid	Histidine Metabolism	X61868	Panyard	291	HMDB02331	861	0.305491	No	No	No
144		1-ribosyl-imidazoleacetate*	0.2	0.047125	0.00957667	139259	Amino Acid	Histidine Metabolism	X61868	Panyard	291	HMDB02331	481	0.231804	No	No	No
145		1-ribosyl-imidazoleacetate*	0.3	0.025101	0.0130912	190914	Amino Acid	Histidine Metabolism	X61868	Panyard	291	HMDB02331	337	0.176228	No	No	No
146		1-ribosyl-imidazoleacetate*	0.4	0.0364896	0.0109863	237081	Amino Acid	Histidine Metabolism	X61868	Panyard	291	HMDB02331	416	0.207535	No	No	No
147		1-ribosyl-imidazoleacetate*	0.5	0.0224081	0.0137382	277618	Amino Acid	Histidine Metabolism	X61868	Panyard	291	HMDB02331	316	0.167777	No	No	No
148	N-acetylisoleucine	N-acetylisoleucine	0.001	0.141007	0.00396928	1602	Amino Acid	Leucine, Isoleucine and Valine Metabolism	X33967	Panyard	291	HMDB61684	1026	0.325168	No	No	No
149		N-acetylisoleucine	0.05	0.116625	0.00487101	44504	Amino Acid	Leucine, Isoleucine and Valine Metabolism	X33967	Panyard	291	HMDB61684	892	0.309345	No	No	No
150		N-acetylisoleucine	0.1	0.0847905	0.00646234	78994	Amino Acid	Leucine, Isoleucine and Valine Metabolism	X33967	Panyard	291	HMDB61684	718	0.279407	No	No	No
151		N-acetylisoleucine	0.2	0.289637	0.00105584	139259	Amino Acid	Leucine, Isoleucine and Valine Metabolism	X33967	Panyard	291	HMDB61684	1654	0.414317	No	No	No
152		N-acetylisoleucine	0.3	0.24604	0.0016206	190914	Amino Acid	Leucine, Isoleucine and Valine Metabolism	X33967	Panyard	291	HMDB61684	1492	0.390168	No	No	No
153		N-acetylisoleucine	0.4	0.0783435	0.00686947	237081	Amino Acid	Leucine, Isoleucine and Valine Metabolism	X33967	Panyard	291	HMDB61684	678	0.273393	No	No	No
154		N-acetylisoleucine	0.5	0.0918509	0.0060552	277618	Amino Acid	Leucine, Isoleucine and Valine Metabolism	X33967	Panyard	291	HMDB61684	761	0.285571	No	No	No
155	gamma-glutamylleucine	gamma-glutamylleucine	0.001	0.00591732	0.0215361	1602	Peptide	Gamma-glutamyl Amino Acid	X18369	Panyard	291	HMDB11171	142	0.0985943	No	No	No
156		gamma-glutamylleucine	0.05	0.304846	0.000895215	44504	Peptide	Gamma-glutamyl Amino Acid	X18369	Panyard	291	HMDB11171	1708	0.422286	No	No	No
157		gamma-glutamylleucine	0.1	0.175123	0.00299401	78994	Peptide	Gamma-glutamyl Amino Acid	X18369	Panyard	291	HMDB11171	1188	0.348773	No	No	No
158		gamma-glutamylleucine	0.2	0.120412	0.00471656	139259	Peptide	Gamma-glutamyl Amino Acid	X18369	Panyard	291	HMDB11171	915	0.31136	No	No	No
159		gamma-glutamylleucine	0.3	0.162377	0.00332677	190914	Peptide	Gamma-glutamyl Amino Acid	X18369	Panyard	291	HMDB11171	1126	0.341194	No	No	No
160		gamma-glutamylleucine	0.4	0.144511	0.00385568	237081	Peptide	Gamma-glutamyl Amino Acid	X18369	Panyard	291	HMDB11171	1043	0.327817	No	No	No
161		gamma-glutamylleucine	0.5	0.146843	0.00378198	277618	Peptide	Gamma-glutamyl Amino Acid	X18369	Panyard	291	HMDB11171	1061	0.327457	No	No	No
162	creatinine	creatinine	0.001	0.472806	1.59915e-05	1602	Amino Acid	Creatine Metabolism	X513	Panyard	291	HMDB00562	2272	0.492368	No	No	No
163		creatinine	0.05	0.0705886	0.00741253	44504	Amino Acid	Creatine Metabolism	X513	Panyard	291	HMDB00562	633	0.263843	No	No	No
164		creatinine	0.1	0.0722431	0.00729122	78994	Amino Acid	Creatine Metabolism	X513	Panyard	291	HMDB00562	642	0.266242	No	No	No
165		creatinine	0.2	0.056204	0.00862253	139259	Amino Acid	Creatine Metabolism	X513	Panyard	291	HMDB00562	535	0.248558	No	No	No
166		creatinine	0.3	0.0761398	0.00701742	190914	Amino Acid	Creatine Metabolism	X513	Panyard	291	HMDB00562	665	0.270897	No	No	No
167		creatinine	0.4	0.0523912	0.00900118	237081	Amino Acid	Creatine Metabolism	X513	Panyard	291	HMDB00562	512	0.242104	No	No	No
168		creatinine	0.5	0.0402306	0.0104453	277618	Amino Acid	Creatine Metabolism	X513	Panyard	291	HMDB00562	434	0.219322	No	No	No
169	3-hydroxybutyrate (BHBA)	3-hydroxybutyrate (BHBA)	0.001	0.0278132	0.0125094	1602	Lipid	Ketone Bodies	X542	Panyard	291	HMDB00357	353	0.186419	No	No	No
170		3-hydroxybutyrate (BHBA)	0.05	0.192451	0.00259109	44504	Lipid	Ketone Bodies	X542	Panyard	291	HMDB00357	1262	0.360808	No	No	No
171		3-hydroxybutyrate (BHBA)	0.1	0.0860238	0.00638848	78994	Lipid	Ketone Bodies	X542	Panyard	291	HMDB00357	725	0.280734	No	No	No
172		3-hydroxybutyrate (BHBA)	0.2	0.0925695	0.00601579	139259	Lipid	Ketone Bodies	X542	Panyard	291	HMDB00357	767	0.285553	No	No	No
173		3-hydroxybutyrate (BHBA)	0.3	0.0410991	0.0103274	190914	Lipid	Ketone Bodies	X542	Panyard	291	HMDB00357	437	0.222518	No	No	No
174		3-hydroxybutyrate (BHBA)	0.4	0.0525457	0.00898525	237081	Lipid	Ketone Bodies	X542	Panyard	291	HMDB00357	514	0.241874	No	No	No
175		3-hydroxybutyrate (BHBA)	0.5	0.0315018	0.0118077	277618	Lipid	Ketone Bodies	X542	Panyard	291	HMDB00357	377	0.197701	No	No	No
176	erythronate*	erythronate*	0.001	0.489736	2.27521e-06	1602	Carbohydrate	Aminosugar Metabolism	X42420	Panyard	291	HMDB00613	2333	0.496663	No	No	No
177		erythronate*	0.05	0.0521742	0.00902362	44504	Carbohydrate	Aminosugar Metabolism	X42420	Panyard	291	HMDB00613	510	0.242047	No	No	No
178		erythronate*	0.1	0.264755	0.0013576	78994	Carbohydrate	Aminosugar Metabolism	X42420	Panyard	291	HMDB00613	1565	0.400263	No	No	No
179		erythronate*	0.2	0.368011	0.000390484	139259	Carbohydrate	Aminosugar Metabolism	X42420	Panyard	291	HMDB00613	1898	0.458754	No	No	No
180		erythronate*	0.3	0.314099	0.00080556	190914	Carbohydrate	Aminosugar Metabolism	X42420	Panyard	291	HMDB00613	1731	0.429323	No	No	No
181		erythronate*	0.4	0.353182	0.000487635	237081	Carbohydrate	Aminosugar Metabolism	X42420	Panyard	291	HMDB00613	1865	0.448058	No	No	No
182		erythronate*	0.5	0.42247	0.000131437	277618	Carbohydrate	Aminosugar Metabolism	X42420	Panyard	291	HMDB00613	2083	0.479868	No	No	No
183	urea	urea	0.001	0.368118	0.000389832	1602	Amino Acid	Urea cycle; Arginine and Proline Metabolism	X1670	Panyard	291	HMDB00294	1899	0.458645	No	No	No
184		urea	0.05	0.455098	4.37163e-05	44504	Amino Acid	Urea cycle; Arginine and Proline Metabolism	X1670	Panyard	291	HMDB00294	2209	0.487443	No	No	No
185		urea	0.1	0.183146	0.00280091	78994	Amino Acid	Urea cycle; Arginine and Proline Metabolism	X1670	Panyard	291	HMDB00294	1214	0.356938	No	No	No
186		urea	0.2	0.212238	0.00218966	139259	Amino Acid	Urea cycle; Arginine and Proline Metabolism	X1670	Panyard	291	HMDB00294	1362	0.36869	No	No	No
187		urea	0.3	0.269325	0.00129829	190914	Amino Acid	Urea cycle; Arginine and Proline Metabolism	X1670	Panyard	291	HMDB00294	1582	0.402796	No	No	No
188		urea	0.4	0.187097	0.00271004	237081	Amino Acid	Urea cycle; Arginine and Proline Metabolism	X1670	Panyard	291	HMDB00294	1233	0.359019	No	No	No
189		urea	0.5	0.198044	0.00247176	277618	Amino Acid	Urea cycle; Arginine and Proline Metabolism	X1670	Panyard	291	HMDB00294	1287	0.36408	No	No	No
190	X - 24337	X - 24337	0.001	0.0289129	0.0122904	1602	Unknown	Unknown	X52533	Panyard	291	#N/A	357	0.191619	No	No	No
191		X - 24337	0.05	0.428618	0.000111203	44504	Unknown	Unknown	X52533	Panyard	291	#N/A	2103	0.482221	No	No	No
192		X - 24337	0.1	0.39147	0.000260773	78994	Unknown	Unknown	X52533	Panyard	291	#N/A	1982	0.467315	No	No	No
193		X - 24337	0.2	0.247094	0.00160488	139259	Unknown	Unknown	X52533	Panyard	291	#N/A	1499	0.39001	No	No	No
194		X - 24337	0.3	0.291443	0.00103586	190914	Unknown	Unknown	X52533	Panyard	291	#N/A	1665	0.414146	No	No	No
195		X - 24337	0.4	0.218032	0.00208243	237081	Unknown	Unknown	X52533	Panyard	291	#N/A	1391	0.370858	No	No	No
196		X - 24337	0.5	0.184568	0.00276789	277618	Unknown	Unknown	X52533	Panyard	291	#N/A	1219	0.358234	No	No	No
197	sphingomyelin (d18:1/20:1, d18:2/20:0)*	sphingomyelin (d18:1/20:1, d18:2/20:0)*	0.001	0.0718071	0.00732288	1602	Lipid	Sphingolipid Metabolism	X48491	Panyard	291	#N/A	640	0.265462	No	No	No
198		sphingomyelin (d18:1/20:1, d18:2/20:0)*	0.05	0.427518	0.000114695	44504	Lipid	Sphingolipid Metabolism	X48491	Panyard	291	#N/A	2096	0.482589	No	No	No
199		sphingomyelin (d18:1/20:1, d18:2/20:0)*	0.1	0.450583	5.29968e-05	78994	Lipid	Sphingolipid Metabolism	X48491	Panyard	291	#N/A	2190	0.486795	No	No	No
200		sphingomyelin (d18:1/20:1, d18:2/20:0)*	0.2	0.466594	2.41511e-05	139259	Lipid	Sphingolipid Metabolism	X48491	Panyard	291	#N/A	2249	0.490868	No	No	No
201		sphingomyelin (d18:1/20:1, d18:2/20:0)*	0.3	0.25305	0.00151817	190914	Lipid	Sphingolipid Metabolism	X48491	Panyard	291	#N/A	1523	0.393116	No	No	No
202		sphingomyelin (d18:1/20:1, d18:2/20:0)*	0.4	0.262984	0.00138109	237081	Lipid	Sphingolipid Metabolism	X48491	Panyard	291	#N/A	1558	0.399371	No	No	No
203		sphingomyelin (d18:1/20:1, d18:2/20:0)*	0.5	0.42884	0.000110504	277618	Lipid	Sphingolipid Metabolism	X48491	Panyard	291	#N/A	2105	0.482012	No	No	No
204	N-acetyltaurine	N-acetyltaurine	0.001	0.371675	0.000368331	1602	Amino Acid	Methionine, Cysteine, SAM and Taurine Metabolism	X48187	Panyard	291	#N/A	1917	0.458729	No	No	No
205		N-acetyltaurine	0.05	0.458434	3.74393e-05	44504	Amino Acid	Methionine, Cysteine, SAM and Taurine Metabolism	X48187	Panyard	291	#N/A	2223	0.487924	No	No	No
206		N-acetyltaurine	0.1	0.428222	0.000112454	78994	Amino Acid	Methionine, Cysteine, SAM and Taurine Metabolism	X48187	Panyard	291	#N/A	2100	0.482463	No	No	No
207		N-acetyltaurine	0.2	0.145116	0.00383642	139259	Amino Acid	Methionine, Cysteine, SAM and Taurine Metabolism	X48187	Panyard	291	#N/A	1049	0.327307	No	No	No
208		N-acetyltaurine	0.3	0.116569	0.00487334	190914	Amino Acid	Methionine, Cysteine, SAM and Taurine Metabolism	X48187	Panyard	291	#N/A	890	0.309891	No	No	No
209		N-acetyltaurine	0.4	0.244125	0.00164943	237081	Amino Acid	Methionine, Cysteine, SAM and Taurine Metabolism	X48187	Panyard	291	#N/A	1485	0.388956	No	No	No
210		N-acetyltaurine	0.5	0.216884	0.00210333	277618	Amino Acid	Methionine, Cysteine, SAM and Taurine Metabolism	X48187	Panyard	291	#N/A	1386	0.370236	No	No	No
211	2-hydroxybutyrate/2-hydroxyisobutyrate	2-hydroxybutyrate/2-hydroxyisobutyrate	0.001	0.0524378	0.00899637	1602	Amino Acid	Glutathione Metabolism	X52281	Panyard	291	#N/A	513	0.241847	No	No	No
212		2-hydroxybutyrate/2-hydroxyisobutyrate	0.05	0.334391	0.000628773	44504	Amino Acid	Glutathione Metabolism	X52281	Panyard	291	#N/A	1809	0.437351	No	No	No
213		2-hydroxybutyrate/2-hydroxyisobutyrate	0.1	0.275831	0.00121695	78994	Amino Acid	Glutathione Metabolism	X52281	Panyard	291	#N/A	1601	0.40763	No	No	No
214		2-hydroxybutyrate/2-hydroxyisobutyrate	0.2	0.379669	0.000322457	139259	Amino Acid	Glutathione Metabolism	X52281	Panyard	291	#N/A	1944	0.462087	No	No	No
215		2-hydroxybutyrate/2-hydroxyisobutyrate	0.3	0.184591	0.00276736	190914	Amino Acid	Glutathione Metabolism	X52281	Panyard	291	#N/A	1220	0.357985	No	No	No
216		2-hydroxybutyrate/2-hydroxyisobutyrate	0.4	0.212287	0.00218874	237081	Amino Acid	Glutathione Metabolism	X52281	Panyard	291	#N/A	1363	0.368504	No	No	No
217		2-hydroxybutyrate/2-hydroxyisobutyrate	0.5	0.0892743	0.00619948	277618	Amino Acid	Glutathione Metabolism	X52281	Panyard	291	#N/A	744	0.283902	No	No	No
[truncated: 2,149 more rows]
