# Supplementary material for: Molecular Landscape of Tourette’s Disorder
Source: Int J Mol Sci. 2023 Jan 11;24(2):1428. doi: 10.3390/ijms24021428 (PMC9865021; doi:10.3390/ijms24021428)
Supplement: Supplementary file 1 [file ijms-24-01428-s001.zip › supplementary Table S5.xlsx]

## Sheet: Interactions
Source_Molecule	Target_Molecule	Source_localization	Target_localization	Interaction_Type	Interaction_duolicated	Interaction_possible	Interaction_localization	Interaction_Cell	Interaction_drawn	Interaction_DB	Interaction_PMID	Interaction_details	Source_Molecule_Prioritized TD candidate gene	Target_Molecule_Prioritized TD candidate gene	Source_function	Source_cofactor	Source_BrainExp	Source_RNA tissue specific nTPM	Source_RNA single cell type specific nTPM	Source_RNA brain regional specific nTPM	Source_RNA mouse brain regional specific nTPM	Source_RNA pig brain regional specific nTPM	Target_function	Target_cofactor	Target_BrainExp	Target_RNA tissue specific nTPM	Target_RNA single cell type specific nTPM	Target_RNA brain regional specific nTPM	Target_RNA mouse brain regional specific nTPM	Target_RNA pig brain regional specific nTPM
ABCA2	DRD2	Endosome membrane {ECO:0000269|PubMed:11309290, ECO:0000269|PubMed:15093135}; Multi-pass membrane protein {ECO:0000269|PubMed:11309290}. Lysosome membrane {ECO:0000269|PubMed:11309290, ECO:0000269|PubMed:15093135}; Multi-pass membrane protein {ECO:0000269|PubMed:11309290}. Note=Forms discrete, punctate intracellular vesicles. {ECO:0000269|PubMed:11309290}.	Cell membrane {ECO:0000269|PubMed:21645528, ECO:0000269|PubMed:26535572}; Multi-pass membrane protein {ECO:0000255}. Golgi apparatus membrane {ECO:0000269|PubMed:26535572}; Multi-pass membrane protein {ECO:0000255}.	protein-protein interactions	1	0	0	0	0	IPA	0	0	0	0	Probable lipid transporter that modulates cholesterol sequestration in the late endosome/lysosome by regulating the intracellular sphingolipid metabolism, in turn participates in cholesterol homeostasis (PubMed:15238223, PubMed:21810484, PubMed:24201375) (Probable). May alter the transbilayer distribution of ceramide in the intraluminal membrane lipid bilayer, favoring its retention in the outer …	NA	1	brain: 515.5	Oligodendrocytes: 388.7				Dopamine receptor whose activity is mediated by G proteins which inhibit adenylyl cyclase (PubMed:21645528). Positively regulates postnatal regression of retinal hyaloid vessels via suppression of VEGFR2/KDR activity, downstream of OPN5 (By similarity). {ECO:0000250|UniProtKB:P61168, ECO:0000269|PubMed:21645528}.	NA	1	brain: 64.1;pituitary gland: 60.0	Horizontal cells: 60.6	basal ganglia: 64.1	basal ganglia: 205.3	basal ganglia: 146.3
ABCA2	GABARAPL2	Endosome membrane {ECO:0000269|PubMed:11309290, ECO:0000269|PubMed:15093135}; Multi-pass membrane protein {ECO:0000269|PubMed:11309290}. Lysosome membrane {ECO:0000269|PubMed:11309290, ECO:0000269|PubMed:15093135}; Multi-pass membrane protein {ECO:0000269|PubMed:11309290}. Note=Forms discrete, punctate intracellular vesicles. {ECO:0000269|PubMed:11309290}.	Cytoplasmic vesicle, autophagosome {ECO:0000269|PubMed:12507496, ECO:0000269|PubMed:15169837, ECO:0000269|PubMed:17580304, ECO:0000269|PubMed:19056683, ECO:0000269|PubMed:22311637}. Endoplasmic reticulum membrane {ECO:0000269|PubMed:30990354}. Golgi apparatus {ECO:0000250|UniProtKB:P60519}.	expression	1	0	0	0	0	IPA	32753672	Mutation of human GABARAP gene to mutant human GABARAP gene (knockout) in HeLa cells and mutation of human GABARAPL1 gene to mutant human GABARAPL1 gene (knockout) in HeLa cells and mutation of human GABARAPL2 gene to mutant human GABARAPL2 gene (knockout) in HeLa cells decrease expression of human ABCA2 mRNA in HeLa cells that involves starvation. Experiment Type: RNA sequence analysis	0	0	Probable lipid transporter that modulates cholesterol sequestration in the late endosome/lysosome by regulating the intracellular sphingolipid metabolism, in turn participates in cholesterol homeostasis (PubMed:15238223, PubMed:21810484, PubMed:24201375) (Probable). May alter the transbilayer distribution of ceramide in the intraluminal membrane lipid bilayer, favoring its retention in the outer …	NA	1	brain: 515.5	Oligodendrocytes: 388.7				Ubiquitin-like modifier involved in intra-Golgi traffic (By similarity). Modulates intra-Golgi transport through coupling between NSF activity and SNAREs activation (By similarity). It first stimulates the ATPase activity of NSF which in turn stimulates the association with GOSR1 (By similarity). Involved in autophagy (PubMed:20418806, PubMed:23209295). Plays a role in mitophagy which contributes…	NA	1
ABCA2	NR1H2	Endosome membrane {ECO:0000269|PubMed:11309290, ECO:0000269|PubMed:15093135}; Multi-pass membrane protein {ECO:0000269|PubMed:11309290}. Lysosome membrane {ECO:0000269|PubMed:11309290, ECO:0000269|PubMed:15093135}; Multi-pass membrane protein {ECO:0000269|PubMed:11309290}. Note=Forms discrete, punctate intracellular vesicles. {ECO:0000269|PubMed:11309290}.	Nucleus {ECO:0000255|PROSITE-ProRule:PRU00407}.	expression	1	1	0	0	0	IPA	12368482	Homozygous mutant mouse Lxrb [Nr1h2] gene (knockout) in 3 month-old mouse and homozygous mutant mouse Lxr alpha [Nr1h3] gene (knockout) in 3 month-old mouse decrease expression of mouse Abca2 mRNA in brain. Experiment Type: quantitative RT-PCR	0	0	Probable lipid transporter that modulates cholesterol sequestration in the late endosome/lysosome by regulating the intracellular sphingolipid metabolism, in turn participates in cholesterol homeostasis (PubMed:15238223, PubMed:21810484, PubMed:24201375) (Probable). May alter the transbilayer distribution of ceramide in the intraluminal membrane lipid bilayer, favoring its retention in the outer …	NA	1	brain: 515.5	Oligodendrocytes: 388.7				Nuclear receptor that exhibits a ligand-dependent transcriptional activation activity (PubMed:25661920). Binds preferentially to double-stranded oligonucleotide direct repeats having the consensus half-site sequence 5'-AGGTCA-3' and 4-nt spacing (DR-4). Regulates cholesterol uptake through MYLIP-dependent ubiquitination of LDLR, VLDLR and LRP8; DLDLR and LRP8. Interplays functionally with RORA fo…	NA	1
ABCA7	SORT1	Cell membrane {ECO:0000269|PubMed:12917409, ECO:0000269|PubMed:14592415}; Multi-pass membrane protein {ECO:0000255}. Golgi apparatus membrane {ECO:0000250|UniProtKB:Q91V24}; Multi-pass membrane protein {ECO:0000255}. Early endosome membrane {ECO:0000250|UniProtKB:Q91V24}; Multi-pass membrane protein {ECO:0000255}. Cytoplasm {ECO:0000250|UniProtKB:Q91V24}. Cell projection, ruffle membrane {ECO:000…	Golgi apparatus, Golgi stack membrane {ECO:0000269|PubMed:16787399, ECO:0000269|PubMed:18817523}; Single-pass type I membrane protein {ECO:0000305}. Endosome membrane {ECO:0000269|PubMed:18817523}; Single-pass type I membrane protein {ECO:0000305}. Endoplasmic reticulum membrane {ECO:0000305}; Single-pass type I membrane protein {ECO:0000305}. Nucleus membrane {ECO:0000305}; Single-pass type I me…	protein-protein interactions	1	1	CM	N, presynaptic	1	IPA	26496610	Binding of human ABCA7 protein and human SORT1 protein occurs. Experiment Type: affinity chromatography	0	1	Catalyzes the translocation of specific phospholipids from the cytoplasmic to the extracellular/lumenal leaflet of membrane coupled to the hydrolysis of ATP (PubMed:24097981). Transports preferentially phosphatidylserine over phosphatidylcholine (PubMed:24097981). Plays a role in lipid homeostasis and macrophage-mediated phagocytosis (PubMed:14592415, PubMed:12917409, PubMed:12925201, PubMed:1457…	NA	1	bone marrow: 27.6;lymphoid tissue: 26.8;pituitary gland: 29.0	Alveolar cells type 1: 73.7;Bipolar cells: 70.6;Cone photoreceptor cells: 175.2;Extravillous trophoblasts: 303.3;Rod photoreceptor cells: 149.1				Functions as a sorting receptor in the Golgi compartment and as a clearance receptor on the cell surface. Required for protein transport from the Golgi apparatus to the lysosomes by a pathway that is independent of the mannose-6-phosphate receptor (M6PR). Lysosomal proteins bind specifically to the receptor in the Golgi apparatus and the resulting receptor-ligand complex is transported to an acid…	NA	1	brain: 282.9	Oligodendrocytes: 447.8
ABCB9	DNAJC18	Lysosome membrane {ECO:0000269|PubMed:10748049, ECO:0000269|PubMed:15577206, ECO:0000269|PubMed:17897319, ECO:0000269|PubMed:17977821, ECO:0000269|PubMed:18175933, ECO:0000269|PubMed:18952056, ECO:0000269|PubMed:20377823, ECO:0000269|PubMed:21212514, ECO:0000269|PubMed:22641697, ECO:0000269|PubMed:30877195}; Multi-pass membrane protein {ECO:0000255|PROSITE-ProRule:PRU00441, ECO:0000269|PubMed:107…	Membrane {ECO:0000305}; Single-pass membrane protein {ECO:0000305}.	protein-protein interactions	1	0	0	0	0	IPA	28514442	Association of human ABCB9 protein and human ACVR2A protein and human ATF6 protein and human C1orf43 protein and human C2CD2L protein and human CISD2 protein and human DNAJC18 protein and human PCDHAC1 protein and human RPL23 protein and human TYW1 protein occurs. Experiment Type: anti tag coimmunoprecipitation	0	1	ATP-dependent low-affinity peptide transporter which translocates a broad spectrum of peptides from the cytosol to the lysosomal lumen for degradation (PubMed:15863492, PubMed:17977821, PubMed:18434309, PubMed:22641697, PubMed:25646430, PubMed:30877195, PubMed:31417173, PubMed:30353140). Displays a broad peptide length specificity from 6-mer up to at least 59-mer peptides with an optimum of 23-me…	NA	1	brain: 20.9;testis: 17.9	Excitatory neurons: 46.3;Inhibitory neurons: 41.7;Plasma cells: 92.2				NA	NA	1	testis: 78.5	Early spermatids: 529.9;Late spermatids: 1332.4
ABCB9	ESR1	Lysosome membrane {ECO:0000269|PubMed:10748049, ECO:0000269|PubMed:15577206, ECO:0000269|PubMed:17897319, ECO:0000269|PubMed:17977821, ECO:0000269|PubMed:18175933, ECO:0000269|PubMed:18952056, ECO:0000269|PubMed:20377823, ECO:0000269|PubMed:21212514, ECO:0000269|PubMed:22641697, ECO:0000269|PubMed:30877195}; Multi-pass membrane protein {ECO:0000255|PROSITE-ProRule:PRU00441, ECO:0000269|PubMed:107…	[Isoform 1]: Nucleus {ECO:0000255|PROSITE-ProRule:PRU00407, ECO:0000269|PubMed:12682286, ECO:0000269|PubMed:20074560}. Cytoplasm {ECO:0000269|PubMed:12682286, ECO:0000269|PubMed:24498420}. Cell membrane {ECO:0000269|PubMed:12682286}; Peripheral membrane protein {ECO:0000269|PubMed:12682286}; Cytoplasmic side {ECO:0000269|PubMed:12682286}. Note=A minor fraction is associated with the inner membran…	expression	1	0	0	0	0	IPA	23474223	A protein fragment (295-311) (3 hour) from ER-alpha [ESR1] protein decreases expression of human ABCB9 mRNA in T 47d cells. Experiment Type: array analysis	0	0	ATP-dependent low-affinity peptide transporter which translocates a broad spectrum of peptides from the cytosol to the lysosomal lumen for degradation (PubMed:15863492, PubMed:17977821, PubMed:18434309, PubMed:22641697, PubMed:25646430, PubMed:30877195, PubMed:31417173, PubMed:30353140). Displays a broad peptide length specificity from 6-mer up to at least 59-mer peptides with an optimum of 23-me…	NA	1	brain: 20.9;testis: 17.9	Excitatory neurons: 46.3;Inhibitory neurons: 41.7;Plasma cells: 92.2				Nuclear hormone receptor. The steroid hormones and their receptors are involved in the regulation of eukaryotic gene expression and affect cellular proliferation and differentiation in target tissues. Ligand-dependent nuclear transactivation involves either direct homodimer binding to a palindromic estrogen response element (ERE) sequence or association with other DNA-binding transcription factor…	NA	1	cervix: 84.5;endometrium 1: 111.9;fallopian tube: 65.5	Breast glandular cells: 86.6;Endometrial ciliated cells: 77.9;Endometrial stromal cells: 79.9;Glandular and luminal cells: 98.9;Hepatocytes: 52.1;Horizontal cells: 62.2;Skeletal myocytes: 56.7
ABCB9	PCDHAC1	Lysosome membrane {ECO:0000269|PubMed:10748049, ECO:0000269|PubMed:15577206, ECO:0000269|PubMed:17897319, ECO:0000269|PubMed:17977821, ECO:0000269|PubMed:18175933, ECO:0000269|PubMed:18952056, ECO:0000269|PubMed:20377823, ECO:0000269|PubMed:21212514, ECO:0000269|PubMed:22641697, ECO:0000269|PubMed:30877195}; Multi-pass membrane protein {ECO:0000255|PROSITE-ProRule:PRU00441, ECO:0000269|PubMed:107…	Cell membrane {ECO:0000250}; Single-pass type I membrane protein {ECO:0000250}.	protein-protein interactions	1	0	0	0	0	IPA	0	0	0	0	ATP-dependent low-affinity peptide transporter which translocates a broad spectrum of peptides from the cytosol to the lysosomal lumen for degradation (PubMed:15863492, PubMed:17977821, PubMed:18434309, PubMed:22641697, PubMed:25646430, PubMed:30877195, PubMed:31417173, PubMed:30353140). Displays a broad peptide length specificity from 6-mer up to at least 59-mer peptides with an optimum of 23-me…	NA	1	brain: 20.9;testis: 17.9	Excitatory neurons: 46.3;Inhibitory neurons: 41.7;Plasma cells: 92.2				Potential calcium-dependent cell-adhesion protein. May be involved in the establishment and maintenance of specific neuronal connections in the brain.	NA	1	parathyroid gland: 30.0	Alveolar cells type 1: 6.4
ABCC1	KCNK1	Cell membrane {ECO:0000269|PubMed:16230346, ECO:0000269|PubMed:31273342}; Multi-pass membrane protein {ECO:0000255|PROSITE-ProRule:PRU00441, ECO:0000269|PubMed:16230346}.	Cell membrane {ECO:0000269|PubMed:15820677, ECO:0000269|PubMed:17693262, ECO:0000269|PubMed:20498050, ECO:0000269|PubMed:21653227, ECO:0000269|PubMed:22282804, ECO:0000269|PubMed:22431633, ECO:0000269|PubMed:23169818, ECO:0000269|PubMed:25001086, ECO:0000269|PubMed:8605869, ECO:0000269|PubMed:8978667}; Multi-pass membrane protein {ECO:0000269|PubMed:22282804, ECO:0000269|PubMed:8978667, ECO:00003…	protein-protein interactions	1	1	CM	A	1	IPA	26496610	Binding of human ABCC1 protein and mouse Kcnk1 protein occurs. Experiment Type: affinity chromatography	0	0	Mediates export of organic anions and drugs from the cytoplasm (PubMed:7961706, PubMed:16230346, PubMed:9281595, PubMed:10064732, PubMed:11114332). Mediates ATP-dependent transport of glutathione and glutathione conjugates, leukotriene C4, estradiol-17-beta-o-glucuronide, methotrexate, antiviral drugs and other xenobiotics (PubMed:7961706, PubMed:16230346, PubMed:9281595, PubMed:10064732, PubMed:…	NA	1		Gastric mucus-secreting cells: 49.5				Ion channel that contributes to passive transmembrane potassium transport and to the regulation of the resting membrane potential in brain astrocytes, but also in kidney and in other tissues (PubMed:15820677, PubMed:21653227). Forms dimeric channels through which potassium ions pass in accordance with their electrochemical gradient. The channel is selective for K(+) ions at physiological potassiu…	NA	1	brain: 57.9	Excitatory neurons: 157.8;Horizontal cells: 200.2;Prostatic glandular cells: 222.9;Urothelial cells: 371.6			cerebellum: 117.0
ABCC1	LMBR1L	Cell membrane {ECO:0000269|PubMed:16230346, ECO:0000269|PubMed:31273342}; Multi-pass membrane protein {ECO:0000255|PROSITE-ProRule:PRU00441, ECO:0000269|PubMed:16230346}.	Cell membrane {ECO:0000269|PubMed:11287427, ECO:0000269|PubMed:17991420, ECO:0000269|PubMed:31073040}; Multi-pass membrane protein {ECO:0000269|PubMed:11287427}. Endoplasmic reticulum membrane {ECO:0000269|PubMed:31073040}; Multi-pass membrane protein {ECO:0000255}.	protein-protein interactions	1	1	CM	A	1	IPA	31073040	Binding of human ABCC1 protein and human LMBR1L protein occurs. Experiment Type: affinity chromatography	0	1	Mediates export of organic anions and drugs from the cytoplasm (PubMed:7961706, PubMed:16230346, PubMed:9281595, PubMed:10064732, PubMed:11114332). Mediates ATP-dependent transport of glutathione and glutathione conjugates, leukotriene C4, estradiol-17-beta-o-glucuronide, methotrexate, antiviral drugs and other xenobiotics (PubMed:7961706, PubMed:16230346, PubMed:9281595, PubMed:10064732, PubMed:…	NA	1		Gastric mucus-secreting cells: 49.5				Plays an essential role in lymphocyte development by negatively regulating the canonical Wnt signaling pathway (By similarity). In association with UBAC2 and E3 ubiquitin-protein ligase AMFR, promotes the ubiquitin-mediated degradation of CTNNB1 and Wnt receptors FZD6 and LRP6 (By similarity). LMBR1L stabilizes the beta-catenin destruction complex that is required for regulating CTNNB1 levels (By…	NA	1		Granulosa cells: 722.7
ABCC6	MGST1	[Isoform 1]: Basolateral cell membrane {ECO:0000269|PubMed:12901863, ECO:0000269|PubMed:23625951}; Multi-pass membrane protein {ECO:0000255}.; [Isoform 2]: Endoplasmic reticulum membrane {ECO:0000269|PubMed:23912081}; Single-pass membrane protein {ECO:0000255}.	Microsome {ECO:0000250}. Mitochondrion outer membrane {ECO:0000250}; Peripheral membrane protein {ECO:0000250}. Endoplasmic reticulum membrane {ECO:0000250}; Multi-pass membrane protein {ECO:0000250}.	protein-protein interactions	1	1	ER	0	0	IPA	29704455	Binding of human ABCC6 protein and human MGST1 protein occurs. Experiment Type: affinity chromatography	0	1	[Isoform 1]: ATP-dependent transporter of the ATP-binding cassette (ABC) family that actively extrudes physiological compounds, and xenobiotics from cells. Mediates ATP-dependent transport of glutathione conjugates such as leukotriene-c4 (LTC4) and N-ethylmaleimide S-glutathione (NEM-GS) (in vitro), and an anionic cyclopentapeptide endothelin antagonist, BQ-123 (PubMed:11880368, PubMed:12414644).…	Mg(2+); Xref=ChEBI:CHEBI:18420; Evidence={ECO:0000269|PubMed:11880368, ECO:0000269|PubMed:12414644};	1	liver: 135.3	Alveolar cells type 2: 31.5;Distal tubular cells: 45.0;Hepatocytes: 77.9;Proximal enterocytes: 33.7;Proximal tubular cells: 151.1				Conjugation of reduced glutathione to a wide number of exogenous and endogenous hydrophobic electrophiles. Has a wide substrate specificity.	NA	1	adipose tissue: 1106.7;adrenal gland: 1146.6;liver: 3130.3	Basal respiratory cells: 1205.9;Club cells: 1308.7;Hepatocytes: 4345.6;Proximal tubular cells: 1265.6
ABCF2	EGFR	NA; membrane	Cell membrane {ECO:0000269|PubMed:17182860, ECO:0000269|PubMed:20462955, ECO:0000269|PubMed:23589287, ECO:0000269|PubMed:27153536, ECO:0000269|PubMed:2790960}; Single-pass type I membrane protein {ECO:0000269|PubMed:27153536}. Endoplasmic reticulum membrane {ECO:0000269|PubMed:27153536}; Single-pass type I membrane protein. Golgi apparatus membrane; Single-pass type I membrane protein. Nucleus me…	protein-protein interactions	1	1	0	0	0	IPA	0	0	0	0	Lacks transmembrane domains and is probably not involved in transport.	NA	1		Late spermatids: 55.9				Receptor tyrosine kinase binding ligands of the EGF family and activating several signaling cascades to convert extracellular cues into appropriate cellular responses (PubMed:2790960, PubMed:10805725, PubMed:27153536). Known ligands include EGF, TGFA/TGF-alpha, AREG, epigen/EPGN, BTC/betacellulin, epiregulin/EREG and HBEGF/heparin-binding EGF (PubMed:2790960, PubMed:7679104, PubMed:8144591, PubMe…	NA	1	placenta: 68.5	Cytotrophoblasts: 287.9;Skeletal myocytes: 251.2;Syncytiotrophoblasts: 376.8
ABCF2	ESR1	NA; membrane	[Isoform 1]: Nucleus {ECO:0000255|PROSITE-ProRule:PRU00407, ECO:0000269|PubMed:12682286, ECO:0000269|PubMed:20074560}. Cytoplasm {ECO:0000269|PubMed:12682286, ECO:0000269|PubMed:24498420}. Cell membrane {ECO:0000269|PubMed:12682286}; Peripheral membrane protein {ECO:0000269|PubMed:12682286}; Cytoplasmic side {ECO:0000269|PubMed:12682286}. Note=A minor fraction is associated with the inner membran…	protein-protein interactions	1	1	0	0	0	IPA	0	0	0	0	Lacks transmembrane domains and is probably not involved in transport.	NA	1		Late spermatids: 55.9				Nuclear hormone receptor. The steroid hormones and their receptors are involved in the regulation of eukaryotic gene expression and affect cellular proliferation and differentiation in target tissues. Ligand-dependent nuclear transactivation involves either direct homodimer binding to a palindromic estrogen response element (ERE) sequence or association with other DNA-binding transcription factor…	NA	1	cervix: 84.5;endometrium 1: 111.9;fallopian tube: 65.5	Breast glandular cells: 86.6;Endometrial ciliated cells: 77.9;Endometrial stromal cells: 79.9;Glandular and luminal cells: 98.9;Hepatocytes: 52.1;Horizontal cells: 62.2;Skeletal myocytes: 56.7
ABCF2	GABRA2	NA; membrane	Cell junction, synapse, postsynaptic cell membrane {ECO:0000250|UniProtKB:P26048}; Multi-pass membrane protein {ECO:0000255}. Cell membrane {ECO:0000250|UniProtKB:P26048}; Multi-pass membrane protein {ECO:0000255}. Cytoplasmic vesicle membrane {ECO:0000250|UniProtKB:P23576}. Cell projection, dendrite {ECO:0000250|UniProtKB:P26048}.	protein-protein interactions	1	1	0	0	0	IPA	0	0	0	1	Lacks transmembrane domains and is probably not involved in transport.	NA	1		Late spermatids: 55.9				Ligand-gated chloride channel which is a component of the heteropentameric receptor for GABA, the major inhibitory neurotransmitter in the brain (PubMed:29961870, PubMed:31032849). Plays an important role in the formation of functional inhibitory GABAergic synapses in addition to mediating synaptic inhibition as a GABA-gated ion channel (PubMed:29961870, PubMed:31032849). The gamma2 subunit is ne…	NA	1	brain: 31.9;epididymis: 8.9	Astrocytes: 425.4;Excitatory neurons: 156.2;Inhibitory neurons: 111.6
ABCF2	LMBR1L	NA; membrane	Cell membrane {ECO:0000269|PubMed:11287427, ECO:0000269|PubMed:17991420, ECO:0000269|PubMed:31073040}; Multi-pass membrane protein {ECO:0000269|PubMed:11287427}. Endoplasmic reticulum membrane {ECO:0000269|PubMed:31073040}; Multi-pass membrane protein {ECO:0000255}.	protein-protein interactions	1	1	0	0	0	IPA	31073040	Binding of human ABCF2 protein and human LMBR1L protein occurs. Experiment Type: affinity chromatography	0	1	Lacks transmembrane domains and is probably not involved in transport.	NA	1		Late spermatids: 55.9				Plays an essential role in lymphocyte development by negatively regulating the canonical Wnt signaling pathway (By similarity). In association with UBAC2 and E3 ubiquitin-protein ligase AMFR, promotes the ubiquitin-mediated degradation of CTNNB1 and Wnt receptors FZD6 and LRP6 (By similarity). LMBR1L stabilizes the beta-catenin destruction complex that is required for regulating CTNNB1 levels (By…	NA	1		Granulosa cells: 722.7
ABCF2	NCL	NA; membrane	Nucleus, nucleolus. Cytoplasm. Note=Localized in cytoplasmic mRNP granules containing untranslated mRNAs.	protein-protein interactions	1	1	0	0	0	IPA	0	0	0	1	Lacks transmembrane domains and is probably not involved in transport.	NA	1		Late spermatids: 55.9				Nucleolin is the major nucleolar protein of growing eukaryotic cells. It is found associated with intranucleolar chromatin and pre-ribosomal particles. It induces chromatin decondensation by binding to histone H1. It is thought to play a role in pre-rRNA transcription and ribosome assembly. May play a role in the process of transcriptional elongation. Binds RNA oligonucleotides with 5'-UUAGGG-3' …	NA	1
ABCF2	RNF4	NA; membrane	Cytoplasm. Nucleus. Nucleus, PML body. Nucleus, nucleoplasm.	protein-protein interactions	1	1	0	0	0	IPA	0	0	0	0	Lacks transmembrane domains and is probably not involved in transport.	NA	1		Late spermatids: 55.9				E3 ubiquitin-protein ligase which binds polysumoylated chains covalently attached to proteins and mediates 'Lys-6'-, 'Lys-11'-, 'Lys-48'- and 'Lys-63'-linked polyubiquitination of those substrates and their subsequent targeting to the proteasome for degradation. Regulates the degradation of several proteins including PML and the transcriptional activator PEA3. Involved in chromosome alignment and…	NA	1
ABCG8	APOM	Cell membrane {ECO:0000305|PubMed:16893193}; Multi-pass membrane protein {ECO:0000269|PubMed:27144356}. Apical cell membrane {ECO:0000269|PubMed:14504269}; Multi-pass membrane protein {ECO:0000269|PubMed:27144356}.	Secreted {ECO:0000269|PubMed:17525477, ECO:0000269|PubMed:18279674, ECO:0000269|PubMed:18460466}. Note=Present in high density lipoprotein (HDL) and to a lesser extent in triglyceride-rich lipoproteins (TGRLP) and low density lipoproteins (LDL).	localization	0	1	CM/S	N	1	IPA	32918529	In Mus (mouse) liver, human ABCG5 protein and human ABCG8 protein increase localization of mouse Apom protein to Mus (mouse) plasma.	0	1	ABCG5 and ABCG8 form an obligate heterodimer that mediates Mg(2+)- and ATP-dependent sterol transport across the cell membrane. Plays an essential role in the selective transport of the dietary cholesterol in and out of the enterocytes and in the selective sterol excretion by the liver into bile (PubMed:11099417, PubMed:11452359, PubMed:27144356, PubMed:15054092). Required for normal sterol homeo…	Mg(2+); Xref=ChEBI:CHEBI:18420; Evidence={ECO:0000250|UniProtKB:Q9DBM0};	1	intestine: 31.7;liver: 63.9	Hepatocytes: 32.0;Proximal enterocytes: 13.8				Probably involved in lipid transport. Can bind sphingosine-1-phosphate, myristic acid, palmitic acid and stearic acid, retinol, all-trans-retinoic acid and 9-cis-retinoic acid. {ECO:0000269|PubMed:17525477, ECO:0000269|PubMed:19733574}.	NA	1	liver: 393.9	Hepatocytes: 665.9;Proximal tubular cells: 681.1
ABCG8	ESR1	Cell membrane {ECO:0000305|PubMed:16893193}; Multi-pass membrane protein {ECO:0000269|PubMed:27144356}. Apical cell membrane {ECO:0000269|PubMed:14504269}; Multi-pass membrane protein {ECO:0000269|PubMed:27144356}.	[Isoform 1]: Nucleus {ECO:0000255|PROSITE-ProRule:PRU00407, ECO:0000269|PubMed:12682286, ECO:0000269|PubMed:20074560}. Cytoplasm {ECO:0000269|PubMed:12682286, ECO:0000269|PubMed:24498420}. Cell membrane {ECO:0000269|PubMed:12682286}; Peripheral membrane protein {ECO:0000269|PubMed:12682286}; Cytoplasmic side {ECO:0000269|PubMed:12682286}. Note=A minor fraction is associated with the inner membran…	expression	1	1	0	0	0	IPA	16606610	Homozygous mutant mouse ERa [Esr1] gene (knockout) in male mouse increases expression of mouse Abcg8 mRNA in liver from male mouse that is decreased by 17-alpha-ethinylestradiol. Experiment Type: quantitative RT-PCR	0	0	ABCG5 and ABCG8 form an obligate heterodimer that mediates Mg(2+)- and ATP-dependent sterol transport across the cell membrane. Plays an essential role in the selective transport of the dietary cholesterol in and out of the enterocytes and in the selective sterol excretion by the liver into bile (PubMed:11099417, PubMed:11452359, PubMed:27144356, PubMed:15054092). Required for normal sterol homeo…	Mg(2+); Xref=ChEBI:CHEBI:18420; Evidence={ECO:0000250|UniProtKB:Q9DBM0};	1	intestine: 31.7;liver: 63.9	Hepatocytes: 32.0;Proximal enterocytes: 13.8				Nuclear hormone receptor. The steroid hormones and their receptors are involved in the regulation of eukaryotic gene expression and affect cellular proliferation and differentiation in target tissues. Ligand-dependent nuclear transactivation involves either direct homodimer binding to a palindromic estrogen response element (ERE) sequence or association with other DNA-binding transcription factor…	NA	1	cervix: 84.5;endometrium 1: 111.9;fallopian tube: 65.5	Breast glandular cells: 86.6;Endometrial ciliated cells: 77.9;Endometrial stromal cells: 79.9;Glandular and luminal cells: 98.9;Hepatocytes: 52.1;Horizontal cells: 62.2;Skeletal myocytes: 56.7
ABCG8	MESD	Cell membrane {ECO:0000305|PubMed:16893193}; Multi-pass membrane protein {ECO:0000269|PubMed:27144356}. Apical cell membrane {ECO:0000269|PubMed:14504269}; Multi-pass membrane protein {ECO:0000269|PubMed:27144356}.	Endoplasmic reticulum {ECO:0000269|PubMed:15014448, ECO:0000269|PubMed:17488095}. Note=Released from apoptotic cells and shed photoreceptor outer segments. {ECO:0000250|UniProtKB:Q9ERE7}.	protein-protein interactions	1	0	0	0	0	IPA	0	0	0	0	ABCG5 and ABCG8 form an obligate heterodimer that mediates Mg(2+)- and ATP-dependent sterol transport across the cell membrane. Plays an essential role in the selective transport of the dietary cholesterol in and out of the enterocytes and in the selective sterol excretion by the liver into bile (PubMed:11099417, PubMed:11452359, PubMed:27144356, PubMed:15054092). Required for normal sterol homeo…	Mg(2+); Xref=ChEBI:CHEBI:18420; Evidence={ECO:0000250|UniProtKB:Q9DBM0};	1	intestine: 31.7;liver: 63.9	Hepatocytes: 32.0;Proximal enterocytes: 13.8				Chaperone specifically assisting the folding of beta-propeller/EGF modules within the family of low-density lipoprotein receptors (LDLRs) (PubMed:15014448). Acts as a modulator of the Wnt pathway through chaperoning the coreceptors of the canonical Wnt pathway, LRP5 and LRP6, to the plasma membrane (PubMed:17488095). Essential for specification of embryonic polarity and mesoderm induction. Plays …	NA	1		Cytotrophoblasts: 341.4;Extravillous trophoblasts: 279.3;Syncytiotrophoblasts: 436.0
ABCG8	NR1H2	Cell membrane {ECO:0000305|PubMed:16893193}; Multi-pass membrane protein {ECO:0000269|PubMed:27144356}. Apical cell membrane {ECO:0000269|PubMed:14504269}; Multi-pass membrane protein {ECO:0000269|PubMed:27144356}.	Nucleus {ECO:0000255|PROSITE-ProRule:PRU00407}.	expression	1	1	CM/N	A	1	IPA	12368482; 18238900	Homozygous mutant mouse Lxrb [Nr1h2] gene (knockout) in 3 month-old mouse and homozygous mutant mouse Lxr alpha [Nr1h3] gene (knockout) in 3 month-old mouse decrease expression of mouse Abcg8 mRNA in brain. Experiment Type: quantitative RT-PCR; Homozygous mutant mouse Lxrbeta [Nr1h2] gene (knockout) in 5 month-old male mouse causes little or no change in expression of mouse Abcg8 mRNA in intestin…	0	0	ABCG5 and ABCG8 form an obligate heterodimer that mediates Mg(2+)- and ATP-dependent sterol transport across the cell membrane. Plays an essential role in the selective transport of the dietary cholesterol in and out of the enterocytes and in the selective sterol excretion by the liver into bile (PubMed:11099417, PubMed:11452359, PubMed:27144356, PubMed:15054092). Required for normal sterol homeo…	Mg(2+); Xref=ChEBI:CHEBI:18420; Evidence={ECO:0000250|UniProtKB:Q9DBM0};	1	intestine: 31.7;liver: 63.9	Hepatocytes: 32.0;Proximal enterocytes: 13.8				Nuclear receptor that exhibits a ligand-dependent transcriptional activation activity (PubMed:25661920). Binds preferentially to double-stranded oligonucleotide direct repeats having the consensus half-site sequence 5'-AGGTCA-3' and 4-nt spacing (DR-4). Regulates cholesterol uptake through MYLIP-dependent ubiquitination of LDLR, VLDLR and LRP8; DLDLR and LRP8. Interplays functionally with RORA fo…	NA	1
ABCG8	NR1H2	Cell membrane {ECO:0000305|PubMed:16893193}; Multi-pass membrane protein {ECO:0000269|PubMed:27144356}. Apical cell membrane {ECO:0000269|PubMed:14504269}; Multi-pass membrane protein {ECO:0000269|PubMed:27144356}.	Nucleus {ECO:0000255|PROSITE-ProRule:PRU00407}.	transcription	1	1	0	0	0	IPA	17006912	LXRbeta [NR1H2] protein is involved in transcriptional regulation of ABCG8 gene.	0	0	ABCG5 and ABCG8 form an obligate heterodimer that mediates Mg(2+)- and ATP-dependent sterol transport across the cell membrane. Plays an essential role in the selective transport of the dietary cholesterol in and out of the enterocytes and in the selective sterol excretion by the liver into bile (PubMed:11099417, PubMed:11452359, PubMed:27144356, PubMed:15054092). Required for normal sterol homeo…	Mg(2+); Xref=ChEBI:CHEBI:18420; Evidence={ECO:0000250|UniProtKB:Q9DBM0};	1	intestine: 31.7;liver: 63.9	Hepatocytes: 32.0;Proximal enterocytes: 13.8				Nuclear receptor that exhibits a ligand-dependent transcriptional activation activity (PubMed:25661920). Binds preferentially to double-stranded oligonucleotide direct repeats having the consensus half-site sequence 5'-AGGTCA-3' and 4-nt spacing (DR-4). Regulates cholesterol uptake through MYLIP-dependent ubiquitination of LDLR, VLDLR and LRP8; DLDLR and LRP8. Interplays functionally with RORA fo…	NA	1
ABHD16A	TNFB	Membrane {ECO:0000250|UniProtKB:Q9Z1Q2}; Multi-pass membrane protein {ECO:0000255}.	Secreted, Membrane. Note: The homotrimer is secreted. The heterotrimer is membrane-associated.	protein-protein interactions	1	1	CM/S	N	1	IPA	32296183	Binding of human ABHD16A protein and human LTA protein occurs. Experiment Type: two-hybrid assay	0	0	Phosphatidylserine (PS) lipase that mediates the hydrolysis of phosphatidylserine to generate lysophosphatidylserine (LPS) (By similarity). LPS constitutes a class of signaling lipids that regulates immunological and neurological processes (By similarity). Has no activity towards diacylglycerol, triacylglycerol or lysophosphatidylserine lipase (PubMed:25290914). Also has monoacylglycerol lipase a…	NA	1						NA	NA	NA	NA	NA	NA	NA	NA
ABHD16A	POLE	Membrane {ECO:0000250|UniProtKB:Q9Z1Q2}; Multi-pass membrane protein {ECO:0000255}.	Nucleus.	protein-protein interactions	1	0	0	0	0	IPA	0	0	0	0	Phosphatidylserine (PS) lipase that mediates the hydrolysis of phosphatidylserine to generate lysophosphatidylserine (LPS) (By similarity). LPS constitutes a class of signaling lipids that regulates immunological and neurological processes (By similarity). Has no activity towards diacylglycerol, triacylglycerol or lysophosphatidylserine lipase (PubMed:25290914). Also has monoacylglycerol lipase a…	NA	1						Catalytic component of the DNA polymerase epsilon complex (PubMed:10801849). Participates in chromosomal DNA replication (By similarity). Required during synthesis of the leading DNA strands at the replication fork, binds at/or near replication origins and moves along DNA with the replication fork (By similarity). Has 3'-5' proofreading exonuclease activity that corrects errors arising during DNA…	NA	1		Spermatocytes: 46.6	cerebellum: 3.9
ABHD16A	RICTOR	Membrane {ECO:0000250|UniProtKB:Q9Z1Q2}; Multi-pass membrane protein {ECO:0000255}.	NA; Cytosol	protein-protein interactions	1	1	0	0	0	IPA	17461779	Binding of human ABHD16A protein and human RICTOR protein occurs. Experiment Type: affinity chromatography	0	0	Phosphatidylserine (PS) lipase that mediates the hydrolysis of phosphatidylserine to generate lysophosphatidylserine (LPS) (By similarity). LPS constitutes a class of signaling lipids that regulates immunological and neurological processes (By similarity). Has no activity towards diacylglycerol, triacylglycerol or lysophosphatidylserine lipase (PubMed:25290914). Also has monoacylglycerol lipase a…	NA	1						Subunit of mTORC2, which regulates cell growth and survival in response to hormonal signals. mTORC2 is activated by growth factors, but, in contrast to mTORC1, seems to be nutrient-insensitive. mTORC2 seems to function upstream of Rho GTPases to regulate the actin cytoskeleton, probably by activating one or more Rho-type guanine nucleotide exchange factors. mTORC2 promotes the serum-induced forma…	NA	1		Oligodendrocyte precursor cells: 258.9;Oligodendrocytes: 343.1
ABHD16A	RNF4	Membrane {ECO:0000250|UniProtKB:Q9Z1Q2}; Multi-pass membrane protein {ECO:0000255}.	Cytoplasm. Nucleus. Nucleus, PML body. Nucleus, nucleoplasm.	protein-protein interactions	1	1	0	0	0	IPA	29180619	Binding of human ABHD16A protein and human RNF4 protein occurs. Experiment Type: affinity chromatography	0	0	Phosphatidylserine (PS) lipase that mediates the hydrolysis of phosphatidylserine to generate lysophosphatidylserine (LPS) (By similarity). LPS constitutes a class of signaling lipids that regulates immunological and neurological processes (By similarity). Has no activity towards diacylglycerol, triacylglycerol or lysophosphatidylserine lipase (PubMed:25290914). Also has monoacylglycerol lipase a…	NA	1						E3 ubiquitin-protein ligase which binds polysumoylated chains covalently attached to proteins and mediates 'Lys-6'-, 'Lys-11'-, 'Lys-48'- and 'Lys-63'-linked polyubiquitination of those substrates and their subsequent targeting to the proteasome for degradation. Regulates the degradation of several proteins including PML and the transcriptional activator PEA3. Involved in chromosome alignment and…	NA	1
ABI2	AKAP9	Cytoplasm {ECO:0000269|PubMed:11516653, ECO:0000269|PubMed:7590236, ECO:0000269|PubMed:8649853}. Nucleus {ECO:0000269|PubMed:7590236}.; [Isoform 1]: Cell projection, lamellipodium {ECO:0000269|PubMed:11516653, ECO:0000269|PubMed:15572692}. Cell projection, filopodium {ECO:0000269|PubMed:11516653}. Cytoplasm, cytoskeleton {ECO:0000269|PubMed:15572692}. Cell junction, adherens junction {ECO:0000269…	Golgi apparatus {ECO:0000269|PubMed:15047863, ECO:0000269|PubMed:19242490, ECO:0000269|PubMed:25217626, ECO:0000269|PubMed:27666745}. Cytoplasm {ECO:0000269|PubMed:9915845}. Cytoplasm, cytoskeleton, microtubule organizing center, centrosome {ECO:0000269|PubMed:12270714, ECO:0000269|PubMed:14654843, ECO:0000269|PubMed:25657325, ECO:0000269|PubMed:29162697, ECO:0000269|PubMed:9915845}. Note=Cytopla…	protein-protein interactions	1	1	0	0	0	IPA	0	0	0	0	Regulator of actin cytoskeleton dynamics underlying cell motility and adhesion. Functions as a component of the WAVE complex, which activates actin nucleating machinery Arp2/3 to drive lamellipodia formation (PubMed:21107423). Acts as regulator and substrate of nonreceptor tyrosine kinases ABL1 and ABL2 involved in processes linked to cell growth and differentiation. Positively regulates ABL1-med…	NA	1						Scaffolding protein that assembles several protein kinases and phosphatases on the centrosome and Golgi apparatus. Required to maintain the integrity of the Golgi apparatus (PubMed:10202149, PubMed:15047863). Required for microtubule nucleation at the cis-side of the Golgi apparatus (PubMed:15047863, PubMed:19242490). Required for association of the centrosomes with the poles of the bipolar mitot…	NA	1		Cone photoreceptor cells: 2230.9;Rod photoreceptor cells: 1279.6
ABI2	CACNA1D	Cytoplasm {ECO:0000269|PubMed:11516653, ECO:0000269|PubMed:7590236, ECO:0000269|PubMed:8649853}. Nucleus {ECO:0000269|PubMed:7590236}.; [Isoform 1]: Cell projection, lamellipodium {ECO:0000269|PubMed:11516653, ECO:0000269|PubMed:15572692}. Cell projection, filopodium {ECO:0000269|PubMed:11516653}. Cytoplasm, cytoskeleton {ECO:0000269|PubMed:15572692}. Cell junction, adherens junction {ECO:0000269…	Membrane {ECO:0000269|PubMed:18482979}; Multi-pass membrane protein {ECO:0000269|PubMed:18482979}.	protein-protein interactions	1	1	0	0	0	IPA	0	0	0	0	Regulator of actin cytoskeleton dynamics underlying cell motility and adhesion. Functions as a component of the WAVE complex, which activates actin nucleating machinery Arp2/3 to drive lamellipodia formation (PubMed:21107423). Acts as regulator and substrate of nonreceptor tyrosine kinases ABL1 and ABL2 involved in processes linked to cell growth and differentiation. Positively regulates ABL1-med…	NA	1						Voltage-sensitive calcium channels (VSCC) mediate the entry of calcium ions into excitable cells and are also involved in a variety of calcium-dependent processes, including muscle contraction, hormone or neurotransmitter release, gene expression, cell motility, cell division and cell death. The isoform alpha-1D gives rise to L-type calcium currents. Long-lasting (L-type) calcium channels belong …	NA	1	brain: 10.2	Excitatory neurons: 251.2;Inhibitory neurons: 354.1;Microglial cells: 126.5;Oligodendrocyte precursor cells: 197.5
ABI2	ENO1	Cytoplasm {ECO:0000269|PubMed:11516653, ECO:0000269|PubMed:7590236, ECO:0000269|PubMed:8649853}. Nucleus {ECO:0000269|PubMed:7590236}.; [Isoform 1]: Cell projection, lamellipodium {ECO:0000269|PubMed:11516653, ECO:0000269|PubMed:15572692}. Cell projection, filopodium {ECO:0000269|PubMed:11516653}. Cytoplasm, cytoskeleton {ECO:0000269|PubMed:15572692}. Cell junction, adherens junction {ECO:0000269…	Cytoplasm {ECO:0000269|PubMed:10802057}. Cell membrane {ECO:0000269|PubMed:10802057}. Cytoplasm, myofibril, sarcomere, M line {ECO:0000269|PubMed:10802057}. Note=Can translocate to the plasma membrane in either the homodimeric (alpha/alpha) or heterodimeric (alpha/gamma) form. ENO1 is localized to the M line.; [Isoform MBP-1]: Nucleus.	protein-RNA interactions	1	1	C	N	1	IPA	22658674	Binding of human ABI2 mRNA and human ENO1 protein occurs. Experiment Type: affinity chromatography	0	1	Regulator of actin cytoskeleton dynamics underlying cell motility and adhesion. Functions as a component of the WAVE complex, which activates actin nucleating machinery Arp2/3 to drive lamellipodia formation (PubMed:21107423). Acts as regulator and substrate of nonreceptor tyrosine kinases ABL1 and ABL2 involved in processes linked to cell growth and differentiation. Positively regulates ABL1-med…	NA	1						Glycolytic enzyme the catalyzes the conversion of 2-phosphoglycerate to phosphoenolpyruvate (PubMed:29775581, PubMed:1369209). In addition to glycolysis, involved in various processes such as growth control, hypoxia tolerance and allergic responses (PubMed:2005901, PubMed:10802057, PubMed:12666133, PubMed:29775581). May also function in the intravascular and pericellular fibrinolytic system due t…	Mg(2+); Xref=ChEBI:CHEBI:18420; Evidence={ECO:0000269|PubMed:18560153}; Note=Binds two Mg(2+) per subunit. Required for catalysis and for stabilizing the dimer. {ECO:0000269|PubMed:18560153};	1		Ductal cells: 2259.3;Extravillous trophoblasts: 2078.5;Muller glia cells: 2624.9
ABI2	ESR1	Cytoplasm {ECO:0000269|PubMed:11516653, ECO:0000269|PubMed:7590236, ECO:0000269|PubMed:8649853}. Nucleus {ECO:0000269|PubMed:7590236}.; [Isoform 1]: Cell projection, lamellipodium {ECO:0000269|PubMed:11516653, ECO:0000269|PubMed:15572692}. Cell projection, filopodium {ECO:0000269|PubMed:11516653}. Cytoplasm, cytoskeleton {ECO:0000269|PubMed:15572692}. Cell junction, adherens junction {ECO:0000269…	[Isoform 1]: Nucleus {ECO:0000255|PROSITE-ProRule:PRU00407, ECO:0000269|PubMed:12682286, ECO:0000269|PubMed:20074560}. Cytoplasm {ECO:0000269|PubMed:12682286, ECO:0000269|PubMed:24498420}. Cell membrane {ECO:0000269|PubMed:12682286}; Peripheral membrane protein {ECO:0000269|PubMed:12682286}; Cytoplasmic side {ECO:0000269|PubMed:12682286}. Note=A minor fraction is associated with the inner membran…	expression	1	1	0	0	0	IPA	0	0	0	0	Regulator of actin cytoskeleton dynamics underlying cell motility and adhesion. Functions as a component of the WAVE complex, which activates actin nucleating machinery Arp2/3 to drive lamellipodia formation (PubMed:21107423). Acts as regulator and substrate of nonreceptor tyrosine kinases ABL1 and ABL2 involved in processes linked to cell growth and differentiation. Positively regulates ABL1-med…	NA	1						Nuclear hormone receptor. The steroid hormones and their receptors are involved in the regulation of eukaryotic gene expression and affect cellular proliferation and differentiation in target tissues. Ligand-dependent nuclear transactivation involves either direct homodimer binding to a palindromic estrogen response element (ERE) sequence or association with other DNA-binding transcription factor…	NA	1	cervix: 84.5;endometrium 1: 111.9;fallopian tube: 65.5	Breast glandular cells: 86.6;Endometrial ciliated cells: 77.9;Endometrial stromal cells: 79.9;Glandular and luminal cells: 98.9;Hepatocytes: 52.1;Horizontal cells: 62.2;Skeletal myocytes: 56.7
ABI2	ESR1	Cytoplasm {ECO:0000269|PubMed:11516653, ECO:0000269|PubMed:7590236, ECO:0000269|PubMed:8649853}. Nucleus {ECO:0000269|PubMed:7590236}.; [Isoform 1]: Cell projection, lamellipodium {ECO:0000269|PubMed:11516653, ECO:0000269|PubMed:15572692}. Cell projection, filopodium {ECO:0000269|PubMed:11516653}. Cytoplasm, cytoskeleton {ECO:0000269|PubMed:15572692}. Cell junction, adherens junction {ECO:0000269…	[Isoform 1]: Nucleus {ECO:0000255|PROSITE-ProRule:PRU00407, ECO:0000269|PubMed:12682286, ECO:0000269|PubMed:20074560}. Cytoplasm {ECO:0000269|PubMed:12682286, ECO:0000269|PubMed:24498420}. Cell membrane {ECO:0000269|PubMed:12682286}; Peripheral membrane protein {ECO:0000269|PubMed:12682286}; Cytoplasmic side {ECO:0000269|PubMed:12682286}. Note=A minor fraction is associated with the inner membran…	protein-protein interactions	1	1	0	0	0	IPA	0	0	0	0	Regulator of actin cytoskeleton dynamics underlying cell motility and adhesion. Functions as a component of the WAVE complex, which activates actin nucleating machinery Arp2/3 to drive lamellipodia formation (PubMed:21107423). Acts as regulator and substrate of nonreceptor tyrosine kinases ABL1 and ABL2 involved in processes linked to cell growth and differentiation. Positively regulates ABL1-med…	NA	1						Nuclear hormone receptor. The steroid hormones and their receptors are involved in the regulation of eukaryotic gene expression and affect cellular proliferation and differentiation in target tissues. Ligand-dependent nuclear transactivation involves either direct homodimer binding to a palindromic estrogen response element (ERE) sequence or association with other DNA-binding transcription factor…	NA	1	cervix: 84.5;endometrium 1: 111.9;fallopian tube: 65.5	Breast glandular cells: 86.6;Endometrial ciliated cells: 77.9;Endometrial stromal cells: 79.9;Glandular and luminal cells: 98.9;Hepatocytes: 52.1;Horizontal cells: 62.2;Skeletal myocytes: 56.7
ABI2	GAK	Cytoplasm {ECO:0000269|PubMed:11516653, ECO:0000269|PubMed:7590236, ECO:0000269|PubMed:8649853}. Nucleus {ECO:0000269|PubMed:7590236}.; [Isoform 1]: Cell projection, lamellipodium {ECO:0000269|PubMed:11516653, ECO:0000269|PubMed:15572692}. Cell projection, filopodium {ECO:0000269|PubMed:11516653}. Cytoplasm, cytoskeleton {ECO:0000269|PubMed:15572692}. Cell junction, adherens junction {ECO:0000269…	Cytoplasm, perinuclear region {ECO:0000269|PubMed:10625686}. Golgi apparatus, trans-Golgi network {ECO:0000269|PubMed:10625686}. Cell junction, focal adhesion {ECO:0000305|PubMed:10625686}. Note=Localizes to the perinuclear area and to the trans-Golgi network. Also seen on the plasma membrane, probably at focal adhesions.	protein-protein interactions	1	1	C	N	1	IPA	28514442	Association of human ABI2 protein and human BRK1 protein and human CBLC protein and human CYFIP1 protein and human CYFIP2 protein and human GAK protein and human LPP protein and human MGME1 protein and human NCKAP1 protein and human WASF1 protein and human WASF2 protein and human ZNHIT2 protein occurs. Experiment Type: anti tag coimmunoprecipitation	0	1	Regulator of actin cytoskeleton dynamics underlying cell motility and adhesion. Functions as a component of the WAVE complex, which activates actin nucleating machinery Arp2/3 to drive lamellipodia formation (PubMed:21107423). Acts as regulator and substrate of nonreceptor tyrosine kinases ABL1 and ABL2 involved in processes linked to cell growth and differentiation. Positively regulates ABL1-med…	NA	1						Associates with cyclin G and CDK5. Seems to act as an auxilin homolog that is involved in the uncoating of clathrin-coated vesicles by Hsc70 in non-neuronal cells. Expression oscillates slightly during the cell cycle, peaking at G1. {ECO:0000269|PubMed:10625686}.	NA	1		Late spermatids: 134.7
ABI2	IHO1	Cytoplasm {ECO:0000269|PubMed:11516653, ECO:0000269|PubMed:7590236, ECO:0000269|PubMed:8649853}. Nucleus {ECO:0000269|PubMed:7590236}.; [Isoform 1]: Cell projection, lamellipodium {ECO:0000269|PubMed:11516653, ECO:0000269|PubMed:15572692}. Cell projection, filopodium {ECO:0000269|PubMed:11516653}. Cytoplasm, cytoskeleton {ECO:0000269|PubMed:15572692}. Cell junction, adherens junction {ECO:0000269…	Chromosome {ECO:0000250|UniProtKB:Q6PDM4}. Note=Specifically localizes to unsynapsed chromosomal regions during meiosis. {ECO:0000250|UniProtKB:Q6PDM4}.	protein-protein interactions	1	1	N	N	1	IPA	32296183; 29892012	Binding of human ATN1 protein and human IHO1 protein occurs. Experiment Type: two-hybrid array	0	1	Regulator of actin cytoskeleton dynamics underlying cell motility and adhesion. Functions as a component of the WAVE complex, which activates actin nucleating machinery Arp2/3 to drive lamellipodia formation (PubMed:21107423). Acts as regulator and substrate of nonreceptor tyrosine kinases ABL1 and ABL2 involved in processes linked to cell growth and differentiation. Positively regulates ABL1-med…	NA	1						Required for DNA double-strand breaks (DSBs) formation in unsynapsed regions during meiotic recombination. Probably acts by forming a complex with MEI4 and REC114, which activates DSBs formation in unsynapsed regions, an essential step to ensure completion of synapsis. Not required for HORMAD1 functions in pairing-independent synaptonemal complex formation, ATR recruitment to unsynapsed axes, mei…	NA	1	testis: 26.7	Adipocytes: 1.7;Cardiomyocytes: 1.4;Fibroblasts: 1.1
ABI2	INSYN1	Cytoplasm {ECO:0000269|PubMed:11516653, ECO:0000269|PubMed:7590236, ECO:0000269|PubMed:8649853}. Nucleus {ECO:0000269|PubMed:7590236}.; [Isoform 1]: Cell projection, lamellipodium {ECO:0000269|PubMed:11516653, ECO:0000269|PubMed:15572692}. Cell projection, filopodium {ECO:0000269|PubMed:11516653}. Cytoplasm, cytoskeleton {ECO:0000269|PubMed:15572692}. Cell junction, adherens junction {ECO:0000269…	Cell junction, synapse, postsynaptic density {ECO:0000250|UniProtKB:Q8CD60}.	protein-protein interactions	1	1	C/CM	N	1	IPA	32296183	Binding of human ABI2 protein and human INSYN1 protein occurs. Experiment Type: two-hybrid assay	0	1	Regulator of actin cytoskeleton dynamics underlying cell motility and adhesion. Functions as a component of the WAVE complex, which activates actin nucleating machinery Arp2/3 to drive lamellipodia formation (PubMed:21107423). Acts as regulator and substrate of nonreceptor tyrosine kinases ABL1 and ABL2 involved in processes linked to cell growth and differentiation. Positively regulates ABL1-med…	NA	1						Component of the protein machinery at the inhibitory synapses, probably acting as a scaffold. Inhibitory synapses dampen neuronal activity through postsynaptic hyperpolarization. This synaptic inhibition is fundamental for the functioning of the central nervous system, shaping and orchestrating the flow of information through neuronal networks to generate a precise neural code. {ECO:0000250|UniPr…	NA	1	brain: 50.0;heart muscle: 41.7	Cardiomyocytes: 14.7
ABI2	LMO3	Cytoplasm {ECO:0000269|PubMed:11516653, ECO:0000269|PubMed:7590236, ECO:0000269|PubMed:8649853}. Nucleus {ECO:0000269|PubMed:7590236}.; [Isoform 1]: Cell projection, lamellipodium {ECO:0000269|PubMed:11516653, ECO:0000269|PubMed:15572692}. Cell projection, filopodium {ECO:0000269|PubMed:11516653}. Cytoplasm, cytoskeleton {ECO:0000269|PubMed:15572692}. Cell junction, adherens junction {ECO:0000269…	NA; cytoplasm, nucleus	protein-protein interactions	1	1	C	N	1	IPA	32296183	Binding of human ABI2 protein and human LMO3 protein occurs. Experiment Type: two-hybrid assay	0	1	Regulator of actin cytoskeleton dynamics underlying cell motility and adhesion. Functions as a component of the WAVE complex, which activates actin nucleating machinery Arp2/3 to drive lamellipodia formation (PubMed:21107423). Acts as regulator and substrate of nonreceptor tyrosine kinases ABL1 and ABL2 involved in processes linked to cell growth and differentiation. Positively regulates ABL1-med…	NA	1						NA	NA	1	brain: 97.4	Alveolar cells type 1: 173.1;Alveolar cells type 2: 210.2;Astrocytes: 293.8;Excitatory neurons: 226.2;Oligodendrocyte precursor cells: 112.6
ABI2	LMO4	Cytoplasm {ECO:0000269|PubMed:11516653, ECO:0000269|PubMed:7590236, ECO:0000269|PubMed:8649853}. Nucleus {ECO:0000269|PubMed:7590236}.; [Isoform 1]: Cell projection, lamellipodium {ECO:0000269|PubMed:11516653, ECO:0000269|PubMed:15572692}. Cell projection, filopodium {ECO:0000269|PubMed:11516653}. Cytoplasm, cytoskeleton {ECO:0000269|PubMed:15572692}. Cell junction, adherens junction {ECO:0000269…	NA; cell membrane leading edge, Cytoplasm, cytoplasmic aggregates, Nucleus	protein-protein interactions	1	1	0	0	0	IPA	0	0	0	0	Regulator of actin cytoskeleton dynamics underlying cell motility and adhesion. Functions as a component of the WAVE complex, which activates actin nucleating machinery Arp2/3 to drive lamellipodia formation (PubMed:21107423). Acts as regulator and substrate of nonreceptor tyrosine kinases ABL1 and ABL2 involved in processes linked to cell growth and differentiation. Positively regulates ABL1-med…	NA	1						Probable transcriptional factor. {ECO:0000250}.	NA	1		Endometrial stromal cells: 508.1
ABI2	NCKIPSD	Cytoplasm {ECO:0000269|PubMed:11516653, ECO:0000269|PubMed:7590236, ECO:0000269|PubMed:8649853}. Nucleus {ECO:0000269|PubMed:7590236}.; [Isoform 1]: Cell projection, lamellipodium {ECO:0000269|PubMed:11516653, ECO:0000269|PubMed:15572692}. Cell projection, filopodium {ECO:0000269|PubMed:11516653}. Cytoplasm, cytoskeleton {ECO:0000269|PubMed:15572692}. Cell junction, adherens junction {ECO:0000269…	Nucleus. Note=Colocalizes with DRF1 at membrane ruffles, and with Nck at Z-disks in mature cardiac myocytes.	protein-protein interactions	1	1	N	N	1	IPA	32296183	Binding of human ABI2 protein and human NCKIPSD protein occurs. Experiment Type: two-hybrid assay	0	1	Regulator of actin cytoskeleton dynamics underlying cell motility and adhesion. Functions as a component of the WAVE complex, which activates actin nucleating machinery Arp2/3 to drive lamellipodia formation (PubMed:21107423). Acts as regulator and substrate of nonreceptor tyrosine kinases ABL1 and ABL2 involved in processes linked to cell growth and differentiation. Positively regulates ABL1-med…	NA	1						Has an important role in stress fiber formation induced by active diaphanous protein homolog 1 (DRF1). Induces microspike formation, in vivo (By similarity). In vitro, stimulates N-WASP-induced ARP2/3 complex activation in the absence of CDC42 (By similarity). May play an important role in the maintenance of sarcomeres and/or in the assembly of myofibrils into sarcomeres. Implicated in regulation…	NA	1	parathyroid gland: 122.8	Peritubular cells: 47.4
ABI2	NLGN4X	Cytoplasm {ECO:0000269|PubMed:11516653, ECO:0000269|PubMed:7590236, ECO:0000269|PubMed:8649853}. Nucleus {ECO:0000269|PubMed:7590236}.; [Isoform 1]: Cell projection, lamellipodium {ECO:0000269|PubMed:11516653, ECO:0000269|PubMed:15572692}. Cell projection, filopodium {ECO:0000269|PubMed:11516653}. Cytoplasm, cytoskeleton {ECO:0000269|PubMed:15572692}. Cell junction, adherens junction {ECO:0000269…	Cell membrane; Single-pass type I membrane protein. Cell junction, synapse, postsynaptic density membrane.	protein-protein interactions	1	1	C/CM	N	1	IPA	24439376	Association of human ABI2 protein and human BRK1 protein and human CYFIP1 protein and human NCKAP1 protein and human NLGN4X protein and human WASF1 protein occurs. Experiment Type: pulldown assay	0	1	Regulator of actin cytoskeleton dynamics underlying cell motility and adhesion. Functions as a component of the WAVE complex, which activates actin nucleating machinery Arp2/3 to drive lamellipodia formation (PubMed:21107423). Acts as regulator and substrate of nonreceptor tyrosine kinases ABL1 and ABL2 involved in processes linked to cell growth and differentiation. Positively regulates ABL1-med…	NA	1						Putative neuronal cell surface protein involved in cell-cell-interactions.	NA	1	brain: 19.5;lymphoid tissue: 14.4	Astrocytes: 113.9;Excitatory neurons: 162.2;Inhibitory neurons: 236.8;Oligodendrocyte precursor cells: 702.7
ABI2	PCDH17	Cytoplasm {ECO:0000269|PubMed:11516653, ECO:0000269|PubMed:7590236, ECO:0000269|PubMed:8649853}. Nucleus {ECO:0000269|PubMed:7590236}.; [Isoform 1]: Cell projection, lamellipodium {ECO:0000269|PubMed:11516653, ECO:0000269|PubMed:15572692}. Cell projection, filopodium {ECO:0000269|PubMed:11516653}. Cytoplasm, cytoskeleton {ECO:0000269|PubMed:15572692}. Cell junction, adherens junction {ECO:0000269…	Cell membrane {ECO:0000250}; Single-pass type I membrane protein {ECO:0000250}.	protein-protein interactions	1	1	0	0	0	IPA	0	0	0	0	Regulator of actin cytoskeleton dynamics underlying cell motility and adhesion. Functions as a component of the WAVE complex, which activates actin nucleating machinery Arp2/3 to drive lamellipodia formation (PubMed:21107423). Acts as regulator and substrate of nonreceptor tyrosine kinases ABL1 and ABL2 involved in processes linked to cell growth and differentiation. Positively regulates ABL1-med…	NA	1						Potential calcium-dependent cell-adhesion protein.	NA	1	brain: 22.7;lung: 14.2;lymphoid tissue: 25.3	Adipocytes: 57.6;Astrocytes: 77.1;Early spermatids: 60.7;Endothelial cells: 126.7;Excitatory neurons: 125.2;Hepatic stellate cells: 79.6;Inhibitory neurons: 67.9;Oligodendrocyte precursor cells: 193.0;Oligodendrocytes: 101.1;Spermatocytes: 68.3
ABI2	PCM1	Cytoplasm {ECO:0000269|PubMed:11516653, ECO:0000269|PubMed:7590236, ECO:0000269|PubMed:8649853}. Nucleus {ECO:0000269|PubMed:7590236}.; [Isoform 1]: Cell projection, lamellipodium {ECO:0000269|PubMed:11516653, ECO:0000269|PubMed:15572692}. Cell projection, filopodium {ECO:0000269|PubMed:11516653}. Cytoplasm, cytoskeleton {ECO:0000269|PubMed:15572692}. Cell junction, adherens junction {ECO:0000269…	Cytoplasm, cytoskeleton {ECO:0000250|UniProtKB:Q8AV28}. Cytoplasm, cytoskeleton, microtubule organizing center, centrosome {ECO:0000269|PubMed:14654843, ECO:0000269|PubMed:20719959, ECO:0000269|PubMed:30804208}. Cytoplasmic granule {ECO:0000269|PubMed:15107855}. Cytoplasm, cytoskeleton, microtubule organizing center, centrosome, centriolar satellite {ECO:0000269|PubMed:15107855, ECO:0000269|PubMe…	protein-protein interactions	1	1	C	N	1	IPA	16189514;32296183	Binding of human ABI2 protein and human PCM1 protein occurs. Experiment Type: yeast two-hybrid mating assay	0	1	Regulator of actin cytoskeleton dynamics underlying cell motility and adhesion. Functions as a component of the WAVE complex, which activates actin nucleating machinery Arp2/3 to drive lamellipodia formation (PubMed:21107423). Acts as regulator and substrate of nonreceptor tyrosine kinases ABL1 and ABL2 involved in processes linked to cell growth and differentiation. Positively regulates ABL1-med…	NA	1						Required for centrosome assembly and function (PubMed:12403812, PubMed:15659651, PubMed:16943179). Essential for the correct localization of several centrosomal proteins including CEP250, CETN3, PCNT and NEK2 (PubMed:12403812, PubMed:15659651). Required to anchor microtubules to the centrosome (PubMed:12403812, PubMed:15659651). Involved in the biogenesis of cilia (PubMed:20551181, PubMed:2412131…	NA	1		Early spermatids: 528.5;Spermatocytes: 569.3
ABI2	PDCD1	Cytoplasm {ECO:0000269|PubMed:11516653, ECO:0000269|PubMed:7590236, ECO:0000269|PubMed:8649853}. Nucleus {ECO:0000269|PubMed:7590236}.; [Isoform 1]: Cell projection, lamellipodium {ECO:0000269|PubMed:11516653, ECO:0000269|PubMed:15572692}. Cell projection, filopodium {ECO:0000269|PubMed:11516653}. Cytoplasm, cytoskeleton {ECO:0000269|PubMed:15572692}. Cell junction, adherens junction {ECO:0000269…	Cell membrane {ECO:0000269|PubMed:30487606}; Single-pass type I membrane protein.	activation	1	1	0	0	0	IPA	0	0	0	0	Regulator of actin cytoskeleton dynamics underlying cell motility and adhesion. Functions as a component of the WAVE complex, which activates actin nucleating machinery Arp2/3 to drive lamellipodia formation (PubMed:21107423). Acts as regulator and substrate of nonreceptor tyrosine kinases ABL1 and ABL2 involved in processes linked to cell growth and differentiation. Positively regulates ABL1-med…	NA	1						Inhibitory receptor on antigen activated T-cells that plays a critical role in induction and maintenance of immune tolerance to self (PubMed:21276005). Delivers inhibitory signals upon binding to ligands CD274/PDCD1L1 and CD273/PDCD1LG2 (PubMed:21276005). Following T-cell receptor (TCR) engagement, PDCD1 associates with CD3-TCR in the immunological synapse and directly inhibits T-cell activation …	NA	1	lymphoid tissue: 16.2	Plasma cells: 9.5;T-cells: 34.7	midbrain: 1.3
ABI2	PDCD1	Cytoplasm {ECO:0000269|PubMed:11516653, ECO:0000269|PubMed:7590236, ECO:0000269|PubMed:8649853}. Nucleus {ECO:0000269|PubMed:7590236}.; [Isoform 1]: Cell projection, lamellipodium {ECO:0000269|PubMed:11516653, ECO:0000269|PubMed:15572692}. Cell projection, filopodium {ECO:0000269|PubMed:11516653}. Cytoplasm, cytoskeleton {ECO:0000269|PubMed:15572692}. Cell junction, adherens junction {ECO:0000269…	Cell membrane {ECO:0000269|PubMed:30487606}; Single-pass type I membrane protein.	phosphorylation	1	1	0	0	0	IPA	0	0	0	0	Regulator of actin cytoskeleton dynamics underlying cell motility and adhesion. Functions as a component of the WAVE complex, which activates actin nucleating machinery Arp2/3 to drive lamellipodia formation (PubMed:21107423). Acts as regulator and substrate of nonreceptor tyrosine kinases ABL1 and ABL2 involved in processes linked to cell growth and differentiation. Positively regulates ABL1-med…	NA	1						Inhibitory receptor on antigen activated T-cells that plays a critical role in induction and maintenance of immune tolerance to self (PubMed:21276005). Delivers inhibitory signals upon binding to ligands CD274/PDCD1L1 and CD273/PDCD1LG2 (PubMed:21276005). Following T-cell receptor (TCR) engagement, PDCD1 associates with CD3-TCR in the immunological synapse and directly inhibits T-cell activation …	NA	1	lymphoid tissue: 16.2	Plasma cells: 9.5;T-cells: 34.7	midbrain: 1.3
ABI2	PDLIM7	Cytoplasm {ECO:0000269|PubMed:11516653, ECO:0000269|PubMed:7590236, ECO:0000269|PubMed:8649853}. Nucleus {ECO:0000269|PubMed:7590236}.; [Isoform 1]: Cell projection, lamellipodium {ECO:0000269|PubMed:11516653, ECO:0000269|PubMed:15572692}. Cell projection, filopodium {ECO:0000269|PubMed:11516653}. Cytoplasm, cytoskeleton {ECO:0000269|PubMed:15572692}. Cell junction, adherens junction {ECO:0000269…	Cytoplasm {ECO:0000250}. Cytoplasm, cytoskeleton {ECO:0000250}. Note=Colocalizes with RET to the cell periphery and in some cytoskeletal components. Colocalizes with TPM2 near the Z line in muscle. Colocalizes with TBX4 and TBX5 to actin filaments (By similarity). {ECO:0000250}.	protein-protein interactions	1	1	CS	N	1	IPA	32296183	Binding of human ABI2 protein and human PDLIM7 protein occurs. Experiment Type: two-hybrid assay	0	1	Regulator of actin cytoskeleton dynamics underlying cell motility and adhesion. Functions as a component of the WAVE complex, which activates actin nucleating machinery Arp2/3 to drive lamellipodia formation (PubMed:21107423). Acts as regulator and substrate of nonreceptor tyrosine kinases ABL1 and ABL2 involved in processes linked to cell growth and differentiation. Positively regulates ABL1-med…	NA	1						May function as a scaffold on which the coordinated assembly of proteins can occur. May play a role as an adapter that, via its PDZ domain, localizes LIM-binding proteins to actin filaments of both skeletal muscle and nonmuscle tissues. Involved in both of the two fundamental mechanisms of bone formation, direct bone formation (e.g. embryonic flat bones mandible and cranium), and endochondral bon…	NA	1	endometrium 1: 493.6;skeletal muscle: 667.9	Ductal cells: 164.8;Exocrine glandular cells: 242.1;Pancreatic endocrine cells: 320.1;Peritubular cells: 223.0;Sertoli cells: 164.3;Smooth muscle cells: 157.7
ABI2	PTPRU	Cytoplasm {ECO:0000269|PubMed:11516653, ECO:0000269|PubMed:7590236, ECO:0000269|PubMed:8649853}. Nucleus {ECO:0000269|PubMed:7590236}.; [Isoform 1]: Cell projection, lamellipodium {ECO:0000269|PubMed:11516653, ECO:0000269|PubMed:15572692}. Cell projection, filopodium {ECO:0000269|PubMed:11516653}. Cytoplasm, cytoskeleton {ECO:0000269|PubMed:15572692}. Cell junction, adherens junction {ECO:0000269…	Cell junction {ECO:0000269|PubMed:8700514}. Cell membrane {ECO:0000269|PubMed:8700514}; Single-pass type I membrane protein {ECO:0000269|PubMed:8700514}.	protein-protein interactions	1	1	C/CM	N, presynaptic	1	IPA	27880917	Binding of human ABI2 protein and human PTPRU protein occurs. PTPRU is located presynaptically - is involved in axonal growth (PMID 19515692).	0	1	Regulator of actin cytoskeleton dynamics underlying cell motility and adhesion. Functions as a component of the WAVE complex, which activates actin nucleating machinery Arp2/3 to drive lamellipodia formation (PubMed:21107423). Acts as regulator and substrate of nonreceptor tyrosine kinases ABL1 and ABL2 involved in processes linked to cell growth and differentiation. Positively regulates ABL1-med…	NA	1						Tyrosine-protein phosphatase which dephosphorylates CTNNB1. Regulates CTNNB1 function both in cell adhesion and signaling. May function in cell proliferation and migration and play a role in the maintenance of epithelial integrity. May play a role in megakaryocytopoiesis. {ECO:0000269|PubMed:10397721, ECO:0000269|PubMed:12501215, ECO:0000269|PubMed:16574648}.	NA	1		Basal respiratory cells: 22.1;Respiratory ciliated cells: 24.3;Rod photoreceptor cells: 42.6
ABI2	TNIK	Cytoplasm {ECO:0000269|PubMed:11516653, ECO:0000269|PubMed:7590236, ECO:0000269|PubMed:8649853}. Nucleus {ECO:0000269|PubMed:7590236}.; [Isoform 1]: Cell projection, lamellipodium {ECO:0000269|PubMed:11516653, ECO:0000269|PubMed:15572692}. Cell projection, filopodium {ECO:0000269|PubMed:11516653}. Cytoplasm, cytoskeleton {ECO:0000269|PubMed:15572692}. Cell junction, adherens junction {ECO:0000269…	Nucleus. Cytoplasm. Recycling endosome. Cytoplasm, cytoskeleton. Note=Associated with recycling endosomes and the cytoskeletal fraction upon RAP2A overexpression.	protein-protein interactions	1	1	0	0	0	IPA	0	0	0	0	Regulator of actin cytoskeleton dynamics underlying cell motility and adhesion. Functions as a component of the WAVE complex, which activates actin nucleating machinery Arp2/3 to drive lamellipodia formation (PubMed:21107423). Acts as regulator and substrate of nonreceptor tyrosine kinases ABL1 and ABL2 involved in processes linked to cell growth and differentiation. Positively regulates ABL1-med…	NA	1						Serine/threonine kinase that acts as an essential activator of the Wnt signaling pathway. Recruited to promoters of Wnt target genes and required to activate their expression. May act by phosphorylating TCF4/TCF7L2. Appears to act upstream of the JUN N-terminal pathway. May play a role in the response to environmental stress. Part of a signaling complex composed of NEDD4, RAP2A and TNIK which reg…	NA	1	brain: 36.1	Astrocytes: 1074.4;Excitatory neurons: 248.4;Inhibitory neurons: 360.8;Oligodendrocyte precursor cells: 374.5;Oligodendrocytes: 205.5
ABI2	TRIP6	Cytoplasm {ECO:0000269|PubMed:11516653, ECO:0000269|PubMed:7590236, ECO:0000269|PubMed:8649853}. Nucleus {ECO:0000269|PubMed:7590236}.; [Isoform 1]: Cell projection, lamellipodium {ECO:0000269|PubMed:11516653, ECO:0000269|PubMed:15572692}. Cell projection, filopodium {ECO:0000269|PubMed:11516653}. Cytoplasm, cytoskeleton {ECO:0000269|PubMed:15572692}. Cell junction, adherens junction {ECO:0000269…	Cytoplasm, cytoskeleton {ECO:0000269|PubMed:16624523}. Cell junction, focal adhesion {ECO:0000269|PubMed:16624523}. Nucleus {ECO:0000269|PubMed:10826496, ECO:0000269|PubMed:16624523}. Cytoplasm {ECO:0000269|PubMed:16624523}. Note=Shuttles between nucleus and cytoplasm (PubMed:16624523). Colocalizes with actin (PubMed:10826496). {ECO:0000269|PubMed:10826496, ECO:0000269|PubMed:16624523}.	protein-protein interactions	1	1	0	0	0	IPA	0	0	0	0	Regulator of actin cytoskeleton dynamics underlying cell motility and adhesion. Functions as a component of the WAVE complex, which activates actin nucleating machinery Arp2/3 to drive lamellipodia formation (PubMed:21107423). Acts as regulator and substrate of nonreceptor tyrosine kinases ABL1 and ABL2 involved in processes linked to cell growth and differentiation. Positively regulates ABL1-med…	NA	1						Relays signals from the cell surface to the nucleus to weaken adherens junction and promote actin cytoskeleton reorganization and cell invasiveness. Involved in lysophosphatidic acid-induced cell adhesion and migration. Acts as a transcriptional coactivator for NF-kappa-B and JUN, and mediates the transrepression of these transcription factors induced by glucocorticoid receptor. {ECO:0000269|PubM…	NA	1
ABI2	WWOX	Cytoplasm {ECO:0000269|PubMed:11516653, ECO:0000269|PubMed:7590236, ECO:0000269|PubMed:8649853}. Nucleus {ECO:0000269|PubMed:7590236}.; [Isoform 1]: Cell projection, lamellipodium {ECO:0000269|PubMed:11516653, ECO:0000269|PubMed:15572692}. Cell projection, filopodium {ECO:0000269|PubMed:11516653}. Cytoplasm, cytoskeleton {ECO:0000269|PubMed:15572692}. Cell junction, adherens junction {ECO:0000269…	Cytoplasm {ECO:0000269|PubMed:14695174, ECO:0000269|PubMed:15070730, ECO:0000269|PubMed:16219768, ECO:0000269|PubMed:19366691, ECO:0000269|PubMed:19465938}. Nucleus {ECO:0000269|PubMed:14695174, ECO:0000269|PubMed:15064722, ECO:0000269|PubMed:16219768, ECO:0000269|PubMed:19366691}. Mitochondrion {ECO:0000269|PubMed:14695174}. Golgi apparatus {ECO:0000305}. Note=Partially localizes to the mitochon…	protein-protein interactions	1	1	0	0	0	IPA	0	0	0	0	Regulator of actin cytoskeleton dynamics underlying cell motility and adhesion. Functions as a component of the WAVE complex, which activates actin nucleating machinery Arp2/3 to drive lamellipodia formation (PubMed:21107423). Acts as regulator and substrate of nonreceptor tyrosine kinases ABL1 and ABL2 involved in processes linked to cell growth and differentiation. Positively regulates ABL1-med…	NA	1						Putative oxidoreductase. Acts as a tumor suppressor and plays a role in apoptosis. Required for normal bone development (By similarity). May function synergistically with p53/TP53 to control genotoxic stress-induced cell death. Plays a role in TGFB1 signaling and TGFB1-mediated cell death. May also play a role in tumor necrosis factor (TNF)-mediated cell death. Inhibits Wnt signaling, probably by…	NA	1		Astrocytes: 927.8;Excitatory neurons: 270.5;Inhibitory neurons: 540.9;Microglial cells: 471.2;Oligodendrocyte precursor cells: 914.9;Oligodendrocytes: 793.5
ACAA1	ESR1	Peroxisome {ECO:0000250|UniProtKB:P21775}.	[Isoform 1]: Nucleus {ECO:0000255|PROSITE-ProRule:PRU00407, ECO:0000269|PubMed:12682286, ECO:0000269|PubMed:20074560}. Cytoplasm {ECO:0000269|PubMed:12682286, ECO:0000269|PubMed:24498420}. Cell membrane {ECO:0000269|PubMed:12682286}; Peripheral membrane protein {ECO:0000269|PubMed:12682286}; Cytoplasmic side {ECO:0000269|PubMed:12682286}. Note=A minor fraction is associated with the inner membran…	protein-protein interactions	1	0	0	0	0	IPA	0	0	0	0	Responsible for the thiolytic cleavage of straight chain 3-oxoacyl-CoAs. Catalyzes the cleavage of short, medium and long straight chain 3-oxoacyl-CoAs, medium chain 3-oxoacyl-CoAs being the best substrates. {ECO:0000250|UniProtKB:P21775}.	NA	1	kidney: 214.6;liver: 664.6	Distal enterocytes: 356.8;Hepatocytes: 686.0;Proximal enterocytes: 441.1;Proximal tubular cells: 721.8				Nuclear hormone receptor. The steroid hormones and their receptors are involved in the regulation of eukaryotic gene expression and affect cellular proliferation and differentiation in target tissues. Ligand-dependent nuclear transactivation involves either direct homodimer binding to a palindromic estrogen response element (ERE) sequence or association with other DNA-binding transcription factor…	NA	1	cervix: 84.5;endometrium 1: 111.9;fallopian tube: 65.5	Breast glandular cells: 86.6;Endometrial ciliated cells: 77.9;Endometrial stromal cells: 79.9;Glandular and luminal cells: 98.9;Hepatocytes: 52.1;Horizontal cells: 62.2;Skeletal myocytes: 56.7
ACAA1	IMMP2L	Peroxisome {ECO:0000250|UniProtKB:P21775}.	Mitochondrion inner membrane {ECO:0000305|PubMed:15814844}; Single-pass membrane protein {ECO:0000305|PubMed:15814844}.	protein-protein interactions	1	0	0	0	0	IPA	0	0	0	0	Responsible for the thiolytic cleavage of straight chain 3-oxoacyl-CoAs. Catalyzes the cleavage of short, medium and long straight chain 3-oxoacyl-CoAs, medium chain 3-oxoacyl-CoAs being the best substrates. {ECO:0000250|UniProtKB:P21775}.	NA	1	kidney: 214.6;liver: 664.6	Distal enterocytes: 356.8;Hepatocytes: 686.0;Proximal enterocytes: 441.1;Proximal tubular cells: 721.8				Catalyzes the removal of transit peptides required for the targeting of proteins from the mitochondrial matrix, across the inner membrane, into the inter-membrane space. Known to process the nuclear encoded protein DIABLO. {ECO:0000269|PubMed:15814844}.	NA	1		Astrocytes: 247.8;Distal tubular cells: 160.4;Excitatory neurons: 365.4;Inhibitory neurons: 373.9;Microglial cells: 455.3;Oligodendrocyte precursor cells: 273.9;Oligodendrocytes: 233.7
ACAA1	GABA (γ-aminoisobutyric acid)	Peroxisome {ECO:0000250|UniProtKB:P21775}.	NA	expression		1	PE/C	N, presynaptic	1	IPA	30509117	GABA decreases expression of mouse Acaa1a mRNA in mouse pancreatic islets. Experiment Type: single-cell RNA sequencing	0	0	Responsible for the thiolytic cleavage of straight chain 3-oxoacyl-CoAs. Catalyzes the cleavage of short, medium and long straight chain 3-oxoacyl-CoAs, medium chain 3-oxoacyl-CoAs being the best substrates. {ECO:0000250|UniProtKB:P21775}.	NA	1	kidney: 214.6;liver: 664.6	Distal enterocytes: 356.8;Hepatocytes: 686.0;Proximal enterocytes: 441.1;Proximal tubular cells: 721.8
ACAA1	PA (palmitic acid)	Peroxisome {ECO:0000250|UniProtKB:P21775}.	NA	expression	1	1	PE/C	N, presynaptic	1	IPA	11606444	In INS-1 cells, palmitate [palmitic acid] increases expression of rat Acaa [Acaa1a] mRNA.	0	0	Responsible for the thiolytic cleavage of straight chain 3-oxoacyl-CoAs. Catalyzes the cleavage of short, medium and long straight chain 3-oxoacyl-CoAs, medium chain 3-oxoacyl-CoAs being the best substrates. {ECO:0000250|UniProtKB:P21775}.	NA	1	kidney: 214.6;liver: 664.6	Distal enterocytes: 356.8;Hepatocytes: 686.0;Proximal enterocytes: 441.1;Proximal tubular cells: 721.8				NA	NA	NA	NA	NA	NA	NA	NA
ACAA1	SLC27A2	Peroxisome {ECO:0000250|UniProtKB:P21775}.	Endoplasmic reticulum membrane {ECO:0000269|PubMed:11980911, ECO:0000269|PubMed:24269233}; Multi-pass membrane protein {ECO:0000255}. Peroxisome membrane {ECO:0000269|PubMed:10198260, ECO:0000269|PubMed:10640429}; Peripheral membrane protein {ECO:0000269|PubMed:10640429}. Cell membrane {ECO:0000250|UniProtKB:O35488}; Multi-pass membrane protein {ECO:0000255}. Microsome {ECO:0000269|PubMed:1064042…	expression	1	1	PE	N, presynaptic	1	IPA	32188695	Mutation of mouse FATP2 [Slc27a2] gene to homozygous mutant mouse FATP2 [Slc27a2] gene (knockout) in 5 week-old male mouse increases expression of mouse Acaa1a mRNA in liver from 5 week-old male mouse that involves chow diet (for 6 weeks). Experiment Type: RNA sequence analysis	0	1	Responsible for the thiolytic cleavage of straight chain 3-oxoacyl-CoAs. Catalyzes the cleavage of short, medium and long straight chain 3-oxoacyl-CoAs, medium chain 3-oxoacyl-CoAs being the best substrates. {ECO:0000250|UniProtKB:P21775}.	NA	1	kidney: 214.6;liver: 664.6	Distal enterocytes: 356.8;Hepatocytes: 686.0;Proximal enterocytes: 441.1;Proximal tubular cells: 721.8				Acyl CoA synthetase that activates long-chain and very long-chain fatty acids (VLCFAs) by catalyzing the formation of fatty acyl-CoA (PubMed:10198260, PubMed:10749848, PubMed:11980911). Can also activate branched-chain fatty acids such as phytanic acid and pristanic acid (PubMed:10198260). Does not activate C24 bile acids, cholate and chenodeoxycholate (PubMed:11980911). In vitro, activates 3-alp…	NA	1	kidney: 159.1;liver: 290.4	Cytotrophoblasts: 265.5;Hepatocytes: 205.7;Proximal enterocytes: 81.0;Proximal tubular cells: 198.9;Respiratory ciliated cells: 70.2
ACO2	ADSL	Mitochondrion {ECO:0000250|UniProtKB:P16276}.	NA; cytosol	protein-protein interactions	1	0	0	0	0	IPA	27684187	Binding of human ACO2 protein and human ADSL protein occurs. Experiment Type: affinity chromatography	1	1	Catalyzes the isomerization of citrate to isocitrate via cis-aconitate. {ECO:0000250|UniProtKB:P16276}.	[4Fe-4S] cluster; Xref=ChEBI:CHEBI:49883; Evidence={ECO:0000250|UniProtKB:P16276}; Note=Binds 1 [4Fe-4S] cluster per subunit. Binding of a [3Fe-4S] cluster leads to an inactive enzyme. {ECO:0000250|UniProtKB:P16276};	1	heart muscle: 477.5;skeletal muscle: 666.7;tongue: 701.9	Proximal enterocytes: 374.2;Proximal tubular cells: 285.7				Catalyzes two non-sequential steps in de novo AMP synthesis: converts (S)-2-(5-amino-1-(5-phospho-D-ribosyl)imidazole-4-carboxamido)succinate (SAICAR) to fumarate plus 5-amino-1-(5-phospho-D-ribosyl)imidazole-4-carboxamide, and thereby also contributes to de novo IMP synthesis, and converts succinyladenosine monophosphate (SAMP) to AMP and fumarate. {ECO:0000269|PubMed:10888601}.	NA	1	skeletal muscle: 348.4;tongue: 244.4
ACO2	CKB	Mitochondrion {ECO:0000250|UniProtKB:P16276}.	Cytoplasm, cytosol {ECO:0000250|UniProtKB:Q04447}. Mitochondrion {ECO:0000250|UniProtKB:Q04447}. Note=Localizes to the mitochondria of thermogenic fat cells via the internal MTS-like signal (iMTS-L) region. {ECO:0000250|UniProtKB:Q04447}.	protein-protein interactions		1	MC	N	1	IID	26344197	biochemical	1	1	Catalyzes the isomerization of citrate to isocitrate via cis-aconitate. {ECO:0000250|UniProtKB:P16276}.	[4Fe-4S] cluster; Xref=ChEBI:CHEBI:49883; Evidence={ECO:0000250|UniProtKB:P16276}; Note=Binds 1 [4Fe-4S] cluster per subunit. Binding of a [3Fe-4S] cluster leads to an inactive enzyme. {ECO:0000250|UniProtKB:P16276};	1	heart muscle: 477.5;skeletal muscle: 666.7;tongue: 701.9	Proximal enterocytes: 374.2;Proximal tubular cells: 285.7				Reversibly catalyzes the transfer of phosphate between ATP and various phosphogens (e.g. creatine phosphate) (PubMed:8186255). Creatine kinase isoenzymes play a central role in energy transduction in tissues with large, fluctuating energy demands, such as skeletal muscle, heart, brain and spermatozoa (Probable). Acts as a key regulator of adaptive thermogenesis as part of the futile creatine cycl…	NA	1	brain: 700.3	Bipolar cells: 2767.4;Distal enterocytes: 4691.8;Distal tubular cells: 2281.3;Horizontal cells: 5042.4;Muller glia cells: 3639.8;Rod photoreceptor cells: 3789.9
ACO2	CIT (Citrate)	Mitochondrion {ECO:0000250|UniProtKB:P16276}.	NA	coversion		1	MC	N	1	Uniprot	8151704	ACO2 catalyzes the isomerization of citrate to isocitrate via cis-aconitate. {ECO:0000250|UniProtKB:P16276}.	1	0	Catalyzes the isomerization of citrate to isocitrate via cis-aconitate. {ECO:0000250|UniProtKB:P16276}.	[4Fe-4S] cluster; Xref=ChEBI:CHEBI:49883; Evidence={ECO:0000250|UniProtKB:P16276}; Note=Binds 1 [4Fe-4S] cluster per subunit. Binding of a [3Fe-4S] cluster leads to an inactive enzyme. {ECO:0000250|UniProtKB:P16276};	1	heart muscle: 477.5;skeletal muscle: 666.7;tongue: 701.9	Proximal enterocytes: 374.2;Proximal tubular cells: 285.7
ACO2	GCG	Mitochondrion {ECO:0000250|UniProtKB:P16276}.	Secreted {ECO:0000305}.; [Glucagon-like peptide 1]: Secreted {ECO:0000269|PubMed:22037645}.	protein-protein interactions	1	0	0	0	0	IPA	0	0	1	0	Catalyzes the isomerization of citrate to isocitrate via cis-aconitate. {ECO:0000250|UniProtKB:P16276}.	[4Fe-4S] cluster; Xref=ChEBI:CHEBI:49883; Evidence={ECO:0000250|UniProtKB:P16276}; Note=Binds 1 [4Fe-4S] cluster per subunit. Binding of a [3Fe-4S] cluster leads to an inactive enzyme. {ECO:0000250|UniProtKB:P16276};	1	heart muscle: 477.5;skeletal muscle: 666.7;tongue: 701.9	Proximal enterocytes: 374.2;Proximal tubular cells: 285.7				[Glucagon]: Plays a key role in glucose metabolism and homeostasis. Regulates blood glucose by increasing gluconeogenesis and decreasing glycolysis. A counterregulatory hormone of insulin, raises plasma glucose levels in response to insulin-induced hypoglycemia. Plays an important role in initiating and maintaining hyperglycemic conditions in diabetes. {ECO:0000305|PubMed:10605628, ECO:0000305|Pu…	NA	1	pancreas: 1959.8	Enteroendocrine cells: 5457.0	basal ganglia: 2.3;medulla oblongata: 4.6	pons and medulla: 3.5	spinal cord: 13.7
ACO2	KCNJ11	Mitochondrion {ECO:0000250|UniProtKB:P16276}.	Membrane; Multi-pass membrane protein.	protein-protein interactions	1	0	0	0	0	IPA	0	0	1	0	Catalyzes the isomerization of citrate to isocitrate via cis-aconitate. {ECO:0000250|UniProtKB:P16276}.	[4Fe-4S] cluster; Xref=ChEBI:CHEBI:49883; Evidence={ECO:0000250|UniProtKB:P16276}; Note=Binds 1 [4Fe-4S] cluster per subunit. Binding of a [3Fe-4S] cluster leads to an inactive enzyme. {ECO:0000250|UniProtKB:P16276};	1	heart muscle: 477.5;skeletal muscle: 666.7;tongue: 701.9	Proximal enterocytes: 374.2;Proximal tubular cells: 285.7				This receptor is controlled by G proteins. Inward rectifier potassium channels are characterized by a greater tendency to allow potassium to flow into the cell rather than out of it. Their voltage dependence is regulated by the concentration of extracellular potassium; as external potassium is raised, the voltage range of the channel opening shifts to more positive voltages. The inward rectificat…	NA	1	skeletal muscle: 135.8;tongue: 41.0	Cardiomyocytes: 14.1;Collecting duct cells: 5.5;Enteroendocrine cells: 4.2;Excitatory neurons: 5.5;Inhibitory neurons: 5.9;Oligodendrocyte precursor cells: 4.0
ACO2	MAPT	Mitochondrion {ECO:0000250|UniProtKB:P16276}.	Cytoplasm, cytosol {ECO:0000269|PubMed:10747907, ECO:0000269|PubMed:23666762, ECO:0000269|PubMed:26014385}. Cell membrane {ECO:0000269|PubMed:10747907}; Peripheral membrane protein {ECO:0000269|PubMed:10747907}; Cytoplasmic side {ECO:0000269|PubMed:10747907}. Cytoplasm, cytoskeleton {ECO:0000269|PubMed:10747907}. Cell projection, axon {ECO:0000269|PubMed:10747907}. Cell projection, dendrite {ECO:…	expression	1	0	0	0	0	IPA	18648646	In 16 month-old mouse, transgenic mutant human APP protein (unspecified protein mutation) and transgenic mutant human TAU [MAPT] protein (unspecified protein mutation) and transgenic mutant human PS1 [PSEN1] protein (unspecified protein mutation) are involved in expression of mouse Aconitate Hydratase, Mitochondrial [Aco2] protein in hippocampus from 16 month-old mouse. Experiment Type: iTRAQ lab…	1	0	Catalyzes the isomerization of citrate to isocitrate via cis-aconitate. {ECO:0000250|UniProtKB:P16276}.	[4Fe-4S] cluster; Xref=ChEBI:CHEBI:49883; Evidence={ECO:0000250|UniProtKB:P16276}; Note=Binds 1 [4Fe-4S] cluster per subunit. Binding of a [3Fe-4S] cluster leads to an inactive enzyme. {ECO:0000250|UniProtKB:P16276};	1	heart muscle: 477.5;skeletal muscle: 666.7;tongue: 701.9	Proximal enterocytes: 374.2;Proximal tubular cells: 285.7				Promotes microtubule assembly and stability, and might be involved in the establishment and maintenance of neuronal polarity (PubMed:21985311). The C-terminus binds axonal microtubules while the N-terminus binds neural plasma membrane components, suggesting that tau functions as a linker protein between both (PubMed:21985311, PubMed:32961270). Axonal polarity is predetermined by TAU/MAPT localiza…	NA	1	brain: 68.5;skeletal muscle: 79.7	Astrocytes: 142.4;Bipolar cells: 314.4;Early spermatids: 199.9;Excitatory neurons: 189.2;Horizontal cells: 361.7;Inhibitory neurons: 153.7;Late spermatids: 416.6;Muller glia cells: 145.7;Oligodendrocytes: 163.8
ACO2	PA (palmitic acid)	Mitochondrion {ECO:0000250|UniProtKB:P16276}.	NA	expression	0	1	MC/C	N	1	IPA	33115805	In C4-2 cells, mutation of human ACO2 gene to mutant human ACO2 gene (knockout) in C4-2 cells decreases level of palmitic acid. Experiment Type: mass spectrometry	1	0	Catalyzes the isomerization of citrate to isocitrate via cis-aconitate. {ECO:0000250|UniProtKB:P16276}.	[4Fe-4S] cluster; Xref=ChEBI:CHEBI:49883; Evidence={ECO:0000250|UniProtKB:P16276}; Note=Binds 1 [4Fe-4S] cluster per subunit. Binding of a [3Fe-4S] cluster leads to an inactive enzyme. {ECO:0000250|UniProtKB:P16276};	1	heart muscle: 477.5;skeletal muscle: 666.7;tongue: 701.9	Proximal enterocytes: 374.2;Proximal tubular cells: 285.7				NA	NA	NA	NA	NA	NA	NA	NA
ACO2	XRCC6	Mitochondrion {ECO:0000250|UniProtKB:P16276}.	Nucleus {ECO:0000269|PubMed:22442688}. Chromosome {ECO:0000269|PubMed:22442688}.	protein-protein interactions	1	0	0	0	0	IPA	27684187	Binding of human ACO2 protein and human XRCC6 protein occurs. Experiment Type: affinity chromatography	1	1	Catalyzes the isomerization of citrate to isocitrate via cis-aconitate. {ECO:0000250|UniProtKB:P16276}.	[4Fe-4S] cluster; Xref=ChEBI:CHEBI:49883; Evidence={ECO:0000250|UniProtKB:P16276}; Note=Binds 1 [4Fe-4S] cluster per subunit. Binding of a [3Fe-4S] cluster leads to an inactive enzyme. {ECO:0000250|UniProtKB:P16276};	1	heart muscle: 477.5;skeletal muscle: 666.7;tongue: 701.9	Proximal enterocytes: 374.2;Proximal tubular cells: 285.7				Single-stranded DNA-dependent ATP-dependent helicase that plays a key role in DNA non-homologous end joining (NHEJ) by recruiting DNA-PK to DNA (PubMed:7957065, PubMed:8621488, PubMed:12145306, PubMed:11493912, PubMed:20493174, PubMed:2466842, PubMed:9742108). Required for double-strand break repair and V(D)J recombination (PubMed:7957065, PubMed:8621488, PubMed:12145306, PubMed:11493912, PubMed:…	NA	1		Spermatocytes: 579.8
ACTR3	BIRC6	Cytoplasm, cytoskeleton {ECO:0000269|PubMed:19109554}. Cell projection {ECO:0000269|PubMed:9230079}. Nucleus {ECO:0000269|PubMed:16767080, ECO:0000269|PubMed:17220302, ECO:0000269|PubMed:29925947}. Note=In pre-apoptotic cells, colocalizes with MEFV in large specks (pyroptosomes) (PubMed:19109554).	Golgi apparatus, trans-Golgi network membrane {ECO:0000269|PubMed:18329369}. Endosome {ECO:0000269|PubMed:18329369}. Cytoplasm, cytoskeleton, spindle pole {ECO:0000269|PubMed:18329369}. Cytoplasm, cytoskeleton, microtubule organizing center, centrosome {ECO:0000269|PubMed:18329369}. Midbody, Midbody ring {ECO:0000269|PubMed:18329369}. Note=Exhibits cell cycle-dependent localization. Concentrates …	protein-protein interactions	1	1	C	N	1	IPA	34079125	Binding of human ACTR3 protein and human BIRC6 protein occurs.	1	1	ATP-binding component of the Arp2/3 complex, a multiprotein complex that mediates actin polymerization upon stimulation by nucleation-promoting factor (NPF) (PubMed:9000076). The Arp2/3 complex mediates the formation of branched actin networks in the cytoplasm, providing the force for cell motility (PubMed:9000076). Seems to contact the pointed end of the daughter actin filament (PubMed:9000076).…	NA	1						Anti-apoptotic protein which can regulate cell death by controlling caspases and by acting as an E3 ubiquitin-protein ligase. Has an unusual ubiquitin conjugation system in that it could combine in a single polypeptide, ubiquitin conjugating (E2) with ubiquitin ligase (E3) activity, forming a chimeric E2/E3 ubiquitin ligase. Its tragets include CASP9 and DIABLO/SMAC. Acts as an inhibitor of CASP3…	NA	1		Excitatory neurons: 272.0;Inhibitory neurons: 291.3;Oligodendrocytes: 361.3
ACTR3	BRPF3	Cytoplasm, cytoskeleton {ECO:0000269|PubMed:19109554}. Cell projection {ECO:0000269|PubMed:9230079}. Nucleus {ECO:0000269|PubMed:16767080, ECO:0000269|PubMed:17220302, ECO:0000269|PubMed:29925947}. Note=In pre-apoptotic cells, colocalizes with MEFV in large specks (pyroptosomes) (PubMed:19109554).	Nucleus {ECO:0000269|PubMed:26677226}.	protein-protein interactions	1	1	N	N	1	IPA	32814053	Binding of human ACTR3 protein and human BRPF3 protein occurs. Experiment Type: yeast two-hybrid mating assay	1	1	ATP-binding component of the Arp2/3 complex, a multiprotein complex that mediates actin polymerization upon stimulation by nucleation-promoting factor (NPF) (PubMed:9000076). The Arp2/3 complex mediates the formation of branched actin networks in the cytoplasm, providing the force for cell motility (PubMed:9000076). Seems to contact the pointed end of the daughter actin filament (PubMed:9000076).…	NA	1						Scaffold subunit of various histone acetyltransferase (HAT) complexes, such as the MOZ/MORF and HBO1 complexes, which have a histone H3 acetyltransferase activity (PubMed:16387653, PubMed:26620551, PubMed:26677226). Plays a role in DNA replication initiation by directing KAT7/HBO1 specificity towards histone H3 'Lys-14' acetylation (H3K14ac), thereby facilitating the activation of replication ori…	NA	1
ACTR3	CORO7-PAM16	Cytoplasm, cytoskeleton {ECO:0000269|PubMed:19109554}. Cell projection {ECO:0000269|PubMed:9230079}. Nucleus {ECO:0000269|PubMed:16767080, ECO:0000269|PubMed:17220302, ECO:0000269|PubMed:29925947}. Note=In pre-apoptotic cells, colocalizes with MEFV in large specks (pyroptosomes) (PubMed:19109554).	NA	protein-protein interactions	1	0	0	0	0	IPA	0	0	1	0	ATP-binding component of the Arp2/3 complex, a multiprotein complex that mediates actin polymerization upon stimulation by nucleation-promoting factor (NPF) (PubMed:9000076). The Arp2/3 complex mediates the formation of branched actin networks in the cytoplasm, providing the force for cell motility (PubMed:9000076). Seems to contact the pointed end of the daughter actin filament (PubMed:9000076).…	NA	1						NA	NA	1		Alveolar cells type 2: 1.1;Club cells: 2.5;Oligodendrocytes: 2.9
ACTR3	DBN1	Cytoplasm, cytoskeleton {ECO:0000269|PubMed:19109554}. Cell projection {ECO:0000269|PubMed:9230079}. Nucleus {ECO:0000269|PubMed:16767080, ECO:0000269|PubMed:17220302, ECO:0000269|PubMed:29925947}. Note=In pre-apoptotic cells, colocalizes with MEFV in large specks (pyroptosomes) (PubMed:19109554).	Cytoplasm {ECO:0000269|PubMed:20215400, ECO:0000269|PubMed:28966017, ECO:0000269|PubMed:8838578}. Cell projection, dendrite {ECO:0000269|PubMed:8838578}. Cytoplasm, cell cortex {ECO:0000269|PubMed:20215400}. Cell junction {ECO:0000269|PubMed:20215400}. Cell projection, growth cone {ECO:0000250|UniProtKB:Q9QXS6}. Note=In the absence of antigen, evenly distributed throughout subcortical regions of …	protein-protein interactions	1	1	C	N, presynaptic	1	IPA	26496610	Binding of human ACTR3 protein and human DBN1 protein occurs. Experiment Type: affinity chromatography	1	0	ATP-binding component of the Arp2/3 complex, a multiprotein complex that mediates actin polymerization upon stimulation by nucleation-promoting factor (NPF) (PubMed:9000076). The Arp2/3 complex mediates the formation of branched actin networks in the cytoplasm, providing the force for cell motility (PubMed:9000076). Seems to contact the pointed end of the daughter actin filament (PubMed:9000076).…	NA	1						Actin cytoskeleton-organizing protein that plays a role in the formation of cell projections (PubMed:20215400). Required for actin polymerization at immunological synapses (IS) and for the recruitment of the chemokine receptor CXCR4 to IS (PubMed:20215400). Plays a role in dendritic spine morphogenesis and organization, including the localization of the dopamine receptor DRD1 to the dendritic spi…	NA	1		Ductal cells: 87.1;Pancreatic endocrine cells: 64.5
ACTR3	DYSF	Cytoplasm, cytoskeleton {ECO:0000269|PubMed:19109554}. Cell projection {ECO:0000269|PubMed:9230079}. Nucleus {ECO:0000269|PubMed:16767080, ECO:0000269|PubMed:17220302, ECO:0000269|PubMed:29925947}. Note=In pre-apoptotic cells, colocalizes with MEFV in large specks (pyroptosomes) (PubMed:19109554).	Cell membrane, sarcolemma; Single-pass type II membrane protein. Cytoplasmic vesicle membrane {ECO:0000250}; Single-pass type II membrane protein {ECO:0000250}. Cell membrane. Note=Colocalizes, during muscle differentiation, with BIN1 in the T-tubule system of myotubules and at the site of contact between two myotubes or a myoblast and a myotube. Wounding of myotubes led to its focal enrichment t…	expression	1	1	C	N	1	IPA	14506282	Depletion of mouse Dysf protein in mouse is involved in expression of mouse 1200003A09Rik [Actr3] mRNA.	1	0	ATP-binding component of the Arp2/3 complex, a multiprotein complex that mediates actin polymerization upon stimulation by nucleation-promoting factor (NPF) (PubMed:9000076). The Arp2/3 complex mediates the formation of branched actin networks in the cytoplasm, providing the force for cell motility (PubMed:9000076). Seems to contact the pointed end of the daughter actin filament (PubMed:9000076).…	NA	1						Key calcium ion sensor involved in the Ca(2+)-triggered synaptic vesicle-plasma membrane fusion. Plays a role in the sarcolemma repair mechanism of both skeletal muscle and cardiomyocytes that permits rapid resealing of membranes disrupted by mechanical stress (By similarity). {ECO:0000250}.	Ca(2+); Xref=ChEBI:CHEBI:29108; Evidence={ECO:0000255|PROSITE-ProRule:PRU00041};	1	skeletal muscle: 96.3	Adipocytes: 30.5;Endothelial cells: 43.7;Excitatory neurons: 34.7;Hepatic stellate cells: 32.2;Kupffer cells: 27.1;Oligodendrocytes: 62.7;Syncytiotrophoblasts: 66.2
ACTR3	ESR1	Cytoplasm, cytoskeleton {ECO:0000269|PubMed:19109554}. Cell projection {ECO:0000269|PubMed:9230079}. Nucleus {ECO:0000269|PubMed:16767080, ECO:0000269|PubMed:17220302, ECO:0000269|PubMed:29925947}. Note=In pre-apoptotic cells, colocalizes with MEFV in large specks (pyroptosomes) (PubMed:19109554).	[Isoform 1]: Nucleus {ECO:0000255|PROSITE-ProRule:PRU00407, ECO:0000269|PubMed:12682286, ECO:0000269|PubMed:20074560}. Cytoplasm {ECO:0000269|PubMed:12682286, ECO:0000269|PubMed:24498420}. Cell membrane {ECO:0000269|PubMed:12682286}; Peripheral membrane protein {ECO:0000269|PubMed:12682286}; Cytoplasmic side {ECO:0000269|PubMed:12682286}. Note=A minor fraction is associated with the inner membran…	protein-protein interactions	1	1	C	N	1	IPA	33731348	Binding of human ACTR3 protein and human ESR1 protein occurs. Experiment Type: affinity chromatography	1	0	ATP-binding component of the Arp2/3 complex, a multiprotein complex that mediates actin polymerization upon stimulation by nucleation-promoting factor (NPF) (PubMed:9000076). The Arp2/3 complex mediates the formation of branched actin networks in the cytoplasm, providing the force for cell motility (PubMed:9000076). Seems to contact the pointed end of the daughter actin filament (PubMed:9000076).…	NA	1						Nuclear hormone receptor. The steroid hormones and their receptors are involved in the regulation of eukaryotic gene expression and affect cellular proliferation and differentiation in target tissues. Ligand-dependent nuclear transactivation involves either direct homodimer binding to a palindromic estrogen response element (ERE) sequence or association with other DNA-binding transcription factor…	NA	1	cervix: 84.5;endometrium 1: 111.9;fallopian tube: 65.5	Breast glandular cells: 86.6;Endometrial ciliated cells: 77.9;Endometrial stromal cells: 79.9;Glandular and luminal cells: 98.9;Hepatocytes: 52.1;Horizontal cells: 62.2;Skeletal myocytes: 56.7
ACTR3	FN1	Cytoplasm, cytoskeleton {ECO:0000269|PubMed:19109554}. Cell projection {ECO:0000269|PubMed:9230079}. Nucleus {ECO:0000269|PubMed:16767080, ECO:0000269|PubMed:17220302, ECO:0000269|PubMed:29925947}. Note=In pre-apoptotic cells, colocalizes with MEFV in large specks (pyroptosomes) (PubMed:19109554).	Secreted, extracellular space, extracellular matrix {ECO:0000305|PubMed:29100092}.	protein-protein interactions	1	0	0	0	0	IPA	19738201	Binding of human ACTR3 protein and human FN1 protein occurs. Experiment Type: affinity chromatography	1	1	ATP-binding component of the Arp2/3 complex, a multiprotein complex that mediates actin polymerization upon stimulation by nucleation-promoting factor (NPF) (PubMed:9000076). The Arp2/3 complex mediates the formation of branched actin networks in the cytoplasm, providing the force for cell motility (PubMed:9000076). Seems to contact the pointed end of the daughter actin filament (PubMed:9000076).…	NA	1						Fibronectins bind cell surfaces and various compounds including collagen, fibrin, heparin, DNA, and actin (PubMed:3024962, PubMed:3900070, PubMed:3593230, PubMed:7989369). Fibronectins are involved in cell adhesion, cell motility, opsonization, wound healing, and maintenance of cell shape (PubMed:3024962, PubMed:3900070, PubMed:3593230, PubMed:7989369). Involved in osteoblast compaction through t…	NA	1	liver: 1740.1;placenta: 2952.1	Extravillous trophoblasts: 2583.6;Fibroblasts: 562.6;Hepatocytes: 1012.4;Smooth muscle cells: 450.2
ACTR3	GAK	Cytoplasm, cytoskeleton {ECO:0000269|PubMed:19109554}. Cell projection {ECO:0000269|PubMed:9230079}. Nucleus {ECO:0000269|PubMed:16767080, ECO:0000269|PubMed:17220302, ECO:0000269|PubMed:29925947}. Note=In pre-apoptotic cells, colocalizes with MEFV in large specks (pyroptosomes) (PubMed:19109554).	Cytoplasm, perinuclear region {ECO:0000269|PubMed:10625686}. Golgi apparatus, trans-Golgi network {ECO:0000269|PubMed:10625686}. Cell junction, focal adhesion {ECO:0000305|PubMed:10625686}. Note=Localizes to the perinuclear area and to the trans-Golgi network. Also seen on the plasma membrane, probably at focal adhesions.	protein-protein interactions	1	1	C	N, presynaptic	1	IPA	34079125	Binding of human ACTR3 protein and human GAK protein occurs.	1	1	ATP-binding component of the Arp2/3 complex, a multiprotein complex that mediates actin polymerization upon stimulation by nucleation-promoting factor (NPF) (PubMed:9000076). The Arp2/3 complex mediates the formation of branched actin networks in the cytoplasm, providing the force for cell motility (PubMed:9000076). Seems to contact the pointed end of the daughter actin filament (PubMed:9000076).…	NA	1						Associates with cyclin G and CDK5. Seems to act as an auxilin homolog that is involved in the uncoating of clathrin-coated vesicles by Hsc70 in non-neuronal cells. Expression oscillates slightly during the cell cycle, peaking at G1. {ECO:0000269|PubMed:10625686}.	NA	1		Late spermatids: 134.7
ACTR3	JUND	Cytoplasm, cytoskeleton {ECO:0000269|PubMed:19109554}. Cell projection {ECO:0000269|PubMed:9230079}. Nucleus {ECO:0000269|PubMed:16767080, ECO:0000269|PubMed:17220302, ECO:0000269|PubMed:29925947}. Note=In pre-apoptotic cells, colocalizes with MEFV in large specks (pyroptosomes) (PubMed:19109554).	Nucleus.	protein-protein interactions	1	1	N	N	1	IPA	20195357	Binding of human ACTR3 protein and human JUND protein occurs. Experiment Type: pulldown assay	1	0	ATP-binding component of the Arp2/3 complex, a multiprotein complex that mediates actin polymerization upon stimulation by nucleation-promoting factor (NPF) (PubMed:9000076). The Arp2/3 complex mediates the formation of branched actin networks in the cytoplasm, providing the force for cell motility (PubMed:9000076). Seems to contact the pointed end of the daughter actin filament (PubMed:9000076).…	NA	1						Transcription factor binding AP-1 sites. {ECO:0000269|PubMed:9989505}.	NA	1		Adipocytes: 2129.8;dendritic cells: 1844.7
ACTR3	MAPK3	Cytoplasm, cytoskeleton {ECO:0000269|PubMed:19109554}. Cell projection {ECO:0000269|PubMed:9230079}. Nucleus {ECO:0000269|PubMed:16767080, ECO:0000269|PubMed:17220302, ECO:0000269|PubMed:29925947}. Note=In pre-apoptotic cells, colocalizes with MEFV in large specks (pyroptosomes) (PubMed:19109554).	Cytoplasm {ECO:0000250|UniProtKB:P21708}. Nucleus. Membrane, caveola {ECO:0000250|UniProtKB:P21708}. Cell junction, focal adhesion {ECO:0000250|UniProtKB:Q63844}. Note=Autophosphorylation at Thr-207 promotes nuclear localization (PubMed:19060905). PEA15-binding redirects the biological outcome of MAPK3 kinase-signaling by sequestering MAPK3 into the cytoplasm (By similarity). {ECO:0000250|UniProt…	protein-protein interactions	1	1	C	N	1	IPA	19935650	Association of rat Actr3 protein and rat Mapk3 protein occurs. Experiment Type: anti bait coimmunoprecipitation	1	0	ATP-binding component of the Arp2/3 complex, a multiprotein complex that mediates actin polymerization upon stimulation by nucleation-promoting factor (NPF) (PubMed:9000076). The Arp2/3 complex mediates the formation of branched actin networks in the cytoplasm, providing the force for cell motility (PubMed:9000076). Seems to contact the pointed end of the daughter actin filament (PubMed:9000076).…	NA	1						Serine/threonine kinase which acts as an essential component of the MAP kinase signal transduction pathway. MAPK1/ERK2 and MAPK3/ERK1 are the 2 MAPKs which play an important role in the MAPK/ERK cascade. They participate also in a signaling cascade initiated by activated KIT and KITLG/SCF. Depending on the cellular context, the MAPK/ERK cascade mediates diverse biological functions such as cell g…	Mg(2+); Xref=ChEBI:CHEBI:18420; Evidence={ECO:0000250};	1		Distal enterocytes: 336.9;Early spermatids: 267.2;Proximal enterocytes: 235.6
ACTR3	MPRIP	Cytoplasm, cytoskeleton {ECO:0000269|PubMed:19109554}. Cell projection {ECO:0000269|PubMed:9230079}. Nucleus {ECO:0000269|PubMed:16767080, ECO:0000269|PubMed:17220302, ECO:0000269|PubMed:29925947}. Note=In pre-apoptotic cells, colocalizes with MEFV in large specks (pyroptosomes) (PubMed:19109554).	Cytoplasm, cytoskeleton {ECO:0000269|PubMed:14506264, ECO:0000269|PubMed:16257966}. Note=Colocalizes with F-actin.	protein-protein interactions	1	1	C/CS	N	1	IPA	34079125	Binding of human ACTR3 protein and human MPRIP protein occurs.	1	1	ATP-binding component of the Arp2/3 complex, a multiprotein complex that mediates actin polymerization upon stimulation by nucleation-promoting factor (NPF) (PubMed:9000076). The Arp2/3 complex mediates the formation of branched actin networks in the cytoplasm, providing the force for cell motility (PubMed:9000076). Seems to contact the pointed end of the daughter actin filament (PubMed:9000076).…	NA	1						Targets myosin phosphatase to the actin cytoskeleton. Required for the regulation of the actin cytoskeleton by RhoA and ROCK1. Depletion leads to an increased number of stress fibers in smooth muscle cells through stabilization of actin fibers by phosphorylated myosin. Overexpression of MRIP as well as its F-actin-binding region leads to disassembly of stress fibers in neuronal cells. {ECO:000025…	NA	1
ACTR3	MYO19	Cytoplasm, cytoskeleton {ECO:0000269|PubMed:19109554}. Cell projection {ECO:0000269|PubMed:9230079}. Nucleus {ECO:0000269|PubMed:16767080, ECO:0000269|PubMed:17220302, ECO:0000269|PubMed:29925947}. Note=In pre-apoptotic cells, colocalizes with MEFV in large specks (pyroptosomes) (PubMed:19109554).	Mitochondrion outer membrane {ECO:0000269|PubMed:19932026, ECO:0000269|PubMed:23568824, ECO:0000269|PubMed:25447992, ECO:0000269|PubMed:26659663, ECO:0000269|PubMed:27126804}; Peripheral membrane protein {ECO:0000269|PubMed:27126804}. Cytoplasm, cytoskeleton {ECO:0000269|PubMed:19932026}.	protein-protein interactions	1	1	C/CS	N	1	IPA	26496610	Binding of human ACTR3 protein and human MYO19 protein occurs. Experiment Type: affinity chromatography	1	1	ATP-binding component of the Arp2/3 complex, a multiprotein complex that mediates actin polymerization upon stimulation by nucleation-promoting factor (NPF) (PubMed:9000076). The Arp2/3 complex mediates the formation of branched actin networks in the cytoplasm, providing the force for cell motility (PubMed:9000076). Seems to contact the pointed end of the daughter actin filament (PubMed:9000076).…	NA	1						Actin-based motor molecule with ATPase activity that localizes to the mitochondrion outer membrane (PubMed:19932026, PubMed:23568824, PubMed:25447992). Motor protein that moves towards the plus-end of actin filaments (By similarity). Required for mitochondrial inheritance during mitosis (PubMed:25447992). May be involved in mitochondrial transport or positioning (PubMed:23568824). {ECO:0000250|Un…	NA	1		Early spermatids: 81.4
ACTR3	PDLIM7	Cytoplasm, cytoskeleton {ECO:0000269|PubMed:19109554}. Cell projection {ECO:0000269|PubMed:9230079}. Nucleus {ECO:0000269|PubMed:16767080, ECO:0000269|PubMed:17220302, ECO:0000269|PubMed:29925947}. Note=In pre-apoptotic cells, colocalizes with MEFV in large specks (pyroptosomes) (PubMed:19109554).	Cytoplasm {ECO:0000250}. Cytoplasm, cytoskeleton {ECO:0000250}. Note=Colocalizes with RET to the cell periphery and in some cytoskeletal components. Colocalizes with TPM2 near the Z line in muscle. Colocalizes with TBX4 and TBX5 to actin filaments (By similarity). {ECO:0000250}.	protein-protein interactions	1	1	CS	N	1	IPA	26496610	Binding of human ACTR3 protein and human PDLIM7 protein occurs. Experiment Type: affinity chromatography	1	1	ATP-binding component of the Arp2/3 complex, a multiprotein complex that mediates actin polymerization upon stimulation by nucleation-promoting factor (NPF) (PubMed:9000076). The Arp2/3 complex mediates the formation of branched actin networks in the cytoplasm, providing the force for cell motility (PubMed:9000076). Seems to contact the pointed end of the daughter actin filament (PubMed:9000076).…	NA	1						May function as a scaffold on which the coordinated assembly of proteins can occur. May play a role as an adapter that, via its PDZ domain, localizes LIM-binding proteins to actin filaments of both skeletal muscle and nonmuscle tissues. Involved in both of the two fundamental mechanisms of bone formation, direct bone formation (e.g. embryonic flat bones mandible and cranium), and endochondral bon…	NA	1	endometrium 1: 493.6;skeletal muscle: 667.9	Ductal cells: 164.8;Exocrine glandular cells: 242.1;Pancreatic endocrine cells: 320.1;Peritubular cells: 223.0;Sertoli cells: 164.3;Smooth muscle cells: 157.7
ACTR3	SLC6A4	Cytoplasm, cytoskeleton {ECO:0000269|PubMed:19109554}. Cell projection {ECO:0000269|PubMed:9230079}. Nucleus {ECO:0000269|PubMed:16767080, ECO:0000269|PubMed:17220302, ECO:0000269|PubMed:29925947}. Note=In pre-apoptotic cells, colocalizes with MEFV in large specks (pyroptosomes) (PubMed:19109554).	Cell membrane {ECO:0000269|PubMed:16870614, ECO:0000269|PubMed:17506858, ECO:0000269|PubMed:27049939}; Multi-pass membrane protein {ECO:0000250|UniProtKB:Q7K4Y6, ECO:0000269|PubMed:27049939}. Endomembrane system {ECO:0000269|PubMed:16870614}; Multi-pass membrane protein {ECO:0000255}. Endosome membrane {ECO:0000269|PubMed:16870614}; Multi-pass membrane protein {ECO:0000255}. Cell junction, synaps…	protein-protein interactions	1	1	C/CM	N, presynaptic	1	IPA	32581705	Binding of mouse Actr3 protein and mouse Slc6a4 protein occurs. Experiment Type: affinity chromatography	1	0	ATP-binding component of the Arp2/3 complex, a multiprotein complex that mediates actin polymerization upon stimulation by nucleation-promoting factor (NPF) (PubMed:9000076). The Arp2/3 complex mediates the formation of branched actin networks in the cytoplasm, providing the force for cell motility (PubMed:9000076). Seems to contact the pointed end of the daughter actin filament (PubMed:9000076).…	NA	1						Serotonin transporter whose primary function in the central nervous system involves the regulation of serotonergic signaling via transport of serotonin molecules from the synaptic cleft back into the pre-synaptic terminal for re-utilization. Plays a key role in mediating regulation of the availability of serotonin to other receptors of serotonergic systems. Terminates the action of serotonin and …	NA	1	brain: 82.4;intestine: 40.7;lung: 29.1	Cytotrophoblasts: 125.4;Proximal enterocytes: 100.9;Syncytiotrophoblasts: 106.4	midbrain: 82.4	midbrain: 58.4	midbrain: 38.9;pons: 29.1
ACTR3	TJP1	Cytoplasm, cytoskeleton {ECO:0000269|PubMed:19109554}. Cell projection {ECO:0000269|PubMed:9230079}. Nucleus {ECO:0000269|PubMed:16767080, ECO:0000269|PubMed:17220302, ECO:0000269|PubMed:29925947}. Note=In pre-apoptotic cells, colocalizes with MEFV in large specks (pyroptosomes) (PubMed:19109554).	Cell membrane {ECO:0000269|PubMed:7798316}; Peripheral membrane protein {ECO:0000269|PubMed:7798316}; Cytoplasmic side {ECO:0000269|PubMed:7798316}. Cell junction, tight junction {ECO:0000269|PubMed:7798316}. Cell junction {ECO:0000269|PubMed:28169360}. Cell junction, gap junction. Cell projection, podosome {ECO:0000269|PubMed:20930113}. Note=Moves from the cytoplasm to the cell membrane concurre…	protein-protein interactions	1	1	C	N	1	IPA	34079125	Binding of human ACTR3 protein and human TJP1 protein occurs.	1	0	ATP-binding component of the Arp2/3 complex, a multiprotein complex that mediates actin polymerization upon stimulation by nucleation-promoting factor (NPF) (PubMed:9000076). The Arp2/3 complex mediates the formation of branched actin networks in the cytoplasm, providing the force for cell motility (PubMed:9000076). Seems to contact the pointed end of the daughter actin filament (PubMed:9000076).…	NA	1						TJP1, TJP2, and TJP3 are closely related scaffolding proteins that link tight junction (TJ) transmembrane proteins such as claudins, junctional adhesion molecules, and occludin to the actin cytoskeleton (PubMed:7798316, PubMed:9792688). The tight junction acts to limit movement of substances through the paracellular space and as a boundary between the compositionally distinct apical and basolater…	NA	1		Oligodendrocytes: 893.8
ACTR3	TNRC6A	Cytoplasm, cytoskeleton {ECO:0000269|PubMed:19109554}. Cell projection {ECO:0000269|PubMed:9230079}. Nucleus {ECO:0000269|PubMed:16767080, ECO:0000269|PubMed:17220302, ECO:0000269|PubMed:29925947}. Note=In pre-apoptotic cells, colocalizes with MEFV in large specks (pyroptosomes) (PubMed:19109554).	Cytoplasm, P-body {ECO:0000269|PubMed:11950943, ECO:0000269|PubMed:13130130, ECO:0000269|PubMed:15494374, ECO:0000269|PubMed:15908945, ECO:0000269|PubMed:16284622, ECO:0000269|PubMed:16284623, ECO:0000269|PubMed:16906129, ECO:0000269|PubMed:18946079, ECO:0000269|PubMed:19056672, ECO:0000269|PubMed:19324964}. Note=Mammalian P-bodies are also known as GW bodies (GWBs). {ECO:0000305}.	protein-protein interactions	1	1	C	N	1	IPA	34079125	Binding of human ACTR3 protein and human TNRC6A protein occurs.	1	0	ATP-binding component of the Arp2/3 complex, a multiprotein complex that mediates actin polymerization upon stimulation by nucleation-promoting factor (NPF) (PubMed:9000076). The Arp2/3 complex mediates the formation of branched actin networks in the cytoplasm, providing the force for cell motility (PubMed:9000076). Seems to contact the pointed end of the daughter actin filament (PubMed:9000076).…	NA	1						Plays a role in RNA-mediated gene silencing by both micro-RNAs (miRNAs) and short interfering RNAs (siRNAs). Required for miRNA-dependent repression of translation and for siRNA-dependent endonucleolytic cleavage of complementary mRNAs by argonaute family proteins. As a scaffolding protein, associates with argonaute proteins bound to partially complementary mRNAs, and can simultaneously recruit C…	NA	1		Astrocytes: 289.3;Excitatory neurons: 283.8;Inhibitory neurons: 414.6;Oligodendrocyte precursor cells: 265.4
ACTR3	ZNF536	Cytoplasm, cytoskeleton {ECO:0000269|PubMed:19109554}. Cell projection {ECO:0000269|PubMed:9230079}. Nucleus {ECO:0000269|PubMed:16767080, ECO:0000269|PubMed:17220302, ECO:0000269|PubMed:29925947}. Note=In pre-apoptotic cells, colocalizes with MEFV in large specks (pyroptosomes) (PubMed:19109554).	Nucleus {ECO:0000305}.	protein-protein interactions	1	1	N	N	1	IPA	34079125	Binding of human ACTR3 protein and human ZNF536 protein occurs.	1	0	ATP-binding component of the Arp2/3 complex, a multiprotein complex that mediates actin polymerization upon stimulation by nucleation-promoting factor (NPF) (PubMed:9000076). The Arp2/3 complex mediates the formation of branched actin networks in the cytoplasm, providing the force for cell motility (PubMed:9000076). Seems to contact the pointed end of the daughter actin filament (PubMed:9000076).…	NA	1						May be involved in transcriptional regulation. Recognizes and binds 2 copies of the core DNA sequence 5'-CCCCCA-3'.	NA	1	brain: 79.2	Inhibitory neurons: 506.0;Oligodendrocytes: 794.4
ACTR8	BCL7A	Nucleus {ECO:0000269|PubMed:18163988}. Chromosome {ECO:0000269|PubMed:18163988}. Note=Specifically localizes to mitotic chromosomes.	NA; nucleus	protein-protein interactions	1	1	N	N	1	IPA	28514442	Binding of human ACTR8 protein and human BCL7A protein occurs.	0	1	Plays an important role in the functional organization of mitotic chromosomes. Exhibits low basal ATPase activity, and unable to polymerize.; Proposed core component of the chromatin remodeling INO80 complex which is involved in transcriptional regulation, DNA replication and probably DNA repair. Required for the recruitment of INO80 (and probably the INO80 complex) to sites of DNA damage. Strong…	NA	1		Early spermatids: 44.3;Late spermatids: 85.9				NA; This gene is directly involved, with Myc and IgH, in a three-way gene translocation in a Burkitt lymphoma cell line. As a result of the gene translocation, the N-terminal region of the gene product is disrupted, which is thought to be related to the pathogenesis of a subset of high-grade B cell non-Hodgkin lymphoma. The N-terminal segment involved in the translocation includes the region that…	NA	1		Basal prostatic cells: 77.9;Horizontal cells: 107.7
ACTR8	INO80D	Nucleus {ECO:0000269|PubMed:18163988}. Chromosome {ECO:0000269|PubMed:18163988}. Note=Specifically localizes to mitotic chromosomes.	Nucleus {ECO:0000269|PubMed:18922472}.	protein-protein interactions	0	1	N	N	1	IPA	24981860	Binding of human ACTR8 protein and human INO80D protein occurs. Experiment Type: affinity chromatography	0	0	Plays an important role in the functional organization of mitotic chromosomes. Exhibits low basal ATPase activity, and unable to polymerize.; Proposed core component of the chromatin remodeling INO80 complex which is involved in transcriptional regulation, DNA replication and probably DNA repair. Required for the recruitment of INO80 (and probably the INO80 complex) to sites of DNA damage. Strong…	NA	1		Early spermatids: 44.3;Late spermatids: 85.9				Putative regulatory component of the chromatin remodeling INO80 complex which is involved in transcriptional regulation, DNA replication and probably DNA repair.	NA	1	bone marrow: 18.1	Astrocytes: 158.7;Excitatory neurons: 127.7;Inhibitory neurons: 129.0;Oligodendrocytes: 188.3
ACTR8	MCRS1	Nucleus {ECO:0000269|PubMed:18163988}. Chromosome {ECO:0000269|PubMed:18163988}. Note=Specifically localizes to mitotic chromosomes.	Nucleus {ECO:0000269|PubMed:15044100, ECO:0000269|PubMed:16571602, ECO:0000269|PubMed:18922472, ECO:0000269|PubMed:20018852}. Nucleus, nucleolus {ECO:0000269|PubMed:16571602, ECO:0000269|PubMed:9654073}. Cytoplasm {ECO:0000269|PubMed:16571602}. Note=In microspherules in the nucleolus. {ECO:0000269|PubMed:9654073}.	protein-protein interactions	0	1	N	N	1	IPA	17721549	Binding of human ACTR8 protein and human MCRS1 protein occurs. Experiment Type: affinity chromatography	0	0	Plays an important role in the functional organization of mitotic chromosomes. Exhibits low basal ATPase activity, and unable to polymerize.; Proposed core component of the chromatin remodeling INO80 complex which is involved in transcriptional regulation, DNA replication and probably DNA repair. Required for the recruitment of INO80 (and probably the INO80 complex) to sites of DNA damage. Strong…	NA	1		Early spermatids: 44.3;Late spermatids: 85.9				Modulates the transcription repressor activity of DAXX by recruiting it to the nucleolus (PubMed:11948183). As part of the NSL complex it may be involved in acetylation of nucleosomal histone H4 on several lysine residues (PubMed:20018852). Putative regulatory component of the chromatin remodeling INO80 complex which is involved in transcriptional regulation, DNA replication and probably DNA repa…	NA	1
ADCY2	AKAP9	Membrane {ECO:0000269|PubMed:15385642}; Multi-pass membrane protein {ECO:0000305}. Cell membrane {ECO:0000269|PubMed:11549699, ECO:0000269|PubMed:21228062}; Multi-pass membrane protein {ECO:0000305}. Cytoplasm {ECO:0000269|PubMed:11549699}.	Golgi apparatus {ECO:0000269|PubMed:15047863, ECO:0000269|PubMed:19242490, ECO:0000269|PubMed:25217626, ECO:0000269|PubMed:27666745}. Cytoplasm {ECO:0000269|PubMed:9915845}. Cytoplasm, cytoskeleton, microtubule organizing center, centrosome {ECO:0000269|PubMed:12270714, ECO:0000269|PubMed:14654843, ECO:0000269|PubMed:25657325, ECO:0000269|PubMed:29162697, ECO:0000269|PubMed:9915845}. Note=Cytopla…	protein-protein interactions	1	1	C	N	1	IPA	18772391	Binding of rat Adcy2 protein and human AKAP9 protein occurs. Experiment Type: pulldown assay	0	0	Catalyzes the formation of the signaling molecule cAMP in response to G-protein signaling (PubMed:15385642). Down-stream signaling cascades mediate changes in gene expression patterns and lead to increased IL6 production. Functions in signaling cascades downstream of the muscarinic acetylcholine receptors (By similarity). {ECO:0000250|UniProtKB:P26769, ECO:0000269|PubMed:15385642}.	Mg(2+); Xref=ChEBI:CHEBI:18420; Evidence={ECO:0000269|PubMed:15385642}; Name=Mn(2+); Xref=ChEBI:CHEBI:29035; Evidence={ECO:0000269|PubMed:15385642}; Note=Binds 2 magnesium ions per subunit. Is also active with manganese (in vitro). {ECO:0000250|UniProtKB:P26769};	1	brain: 45.9;skeletal muscle: 68.9;tongue: 31.0	Astrocytes: 647.1;Excitatory neurons: 406.6;Horizontal cells: 201.9;Inhibitory neurons: 423.9;Oligodendrocyte precursor cells: 181.5				Scaffolding protein that assembles several protein kinases and phosphatases on the centrosome and Golgi apparatus. Required to maintain the integrity of the Golgi apparatus (PubMed:10202149, PubMed:15047863). Required for microtubule nucleation at the cis-side of the Golgi apparatus (PubMed:15047863, PubMed:19242490). Required for association of the centrosomes with the poles of the bipolar mitot…	NA	1		Cone photoreceptor cells: 2230.9;Rod photoreceptor cells: 1279.6
ADCY2	DRD2	Membrane {ECO:0000269|PubMed:15385642}; Multi-pass membrane protein {ECO:0000305}. Cell membrane {ECO:0000269|PubMed:11549699, ECO:0000269|PubMed:21228062}; Multi-pass membrane protein {ECO:0000305}. Cytoplasm {ECO:0000269|PubMed:11549699}.	Cell membrane {ECO:0000269|PubMed:21645528, ECO:0000269|PubMed:26535572}; Multi-pass membrane protein {ECO:0000255}. Golgi apparatus membrane {ECO:0000269|PubMed:26535572}; Multi-pass membrane protein {ECO:0000255}.	activation	1	1	C/CM	N	1	IPA	16489124;11356947	In HEK293 cells, Dexras1 [RASD1] protein decreases activation of Ac2 [ADCY2] protein that is mediated by rat D2L [product of Drd2] protein. Experiment Type: enzyme activity assay; Activation of D2L [product of DRD2] protein increases sensitization of ADENYLYL CYCLASE 2 [ADCY2] protein.	0	0	Catalyzes the formation of the signaling molecule cAMP in response to G-protein signaling (PubMed:15385642). Down-stream signaling cascades mediate changes in gene expression patterns and lead to increased IL6 production. Functions in signaling cascades downstream of the muscarinic acetylcholine receptors (By similarity). {ECO:0000250|UniProtKB:P26769, ECO:0000269|PubMed:15385642}.	Mg(2+); Xref=ChEBI:CHEBI:18420; Evidence={ECO:0000269|PubMed:15385642}; Name=Mn(2+); Xref=ChEBI:CHEBI:29035; Evidence={ECO:0000269|PubMed:15385642}; Note=Binds 2 magnesium ions per subunit. Is also active with manganese (in vitro). {ECO:0000250|UniProtKB:P26769};	1	brain: 45.9;skeletal muscle: 68.9;tongue: 31.0	Astrocytes: 647.1;Excitatory neurons: 406.6;Horizontal cells: 201.9;Inhibitory neurons: 423.9;Oligodendrocyte precursor cells: 181.5				Dopamine receptor whose activity is mediated by G proteins which inhibit adenylyl cyclase (PubMed:21645528). Positively regulates postnatal regression of retinal hyaloid vessels via suppression of VEGFR2/KDR activity, downstream of OPN5 (By similarity). {ECO:0000250|UniProtKB:P61168, ECO:0000269|PubMed:21645528}.	NA	1	brain: 64.1;pituitary gland: 60.0	Horizontal cells: 60.6	basal ganglia: 64.1	basal ganglia: 205.3	basal ganglia: 146.3
ADM	CASP8	Secreted.	Cytoplasm {ECO:0000250|UniProtKB:Q9JHX4}. Nucleus {ECO:0000250|UniProtKB:Q9JHX4}.	expression	0	1	0	0	0	IPA	0	0	0	0	AM and PAMP are potent hypotensive and vasodilatator agents. Numerous actions have been reported most related to the physiologic control of fluid and electrolyte homeostasis. In the kidney, am is diuretic and natriuretic, and both am and pamp inhibit aldosterone secretion by direct adrenal actions. In pituitary gland, both peptides at physiologically relevant doses inhibit basal ACTH secretion. B…	NA	1	adipose tissue: 325.1	Basal prostatic cells: 590.8;Extravillous trophoblasts: 1217.1;Syncytiotrophoblasts: 1084.8				Thiol protease that plays a key role in programmed cell death by acting as a molecular switch for apoptosis, necroptosis and pyroptosis, and is required to prevent tissue damage during embryonic development and adulthood (By similarity). Initiator protease that induces extrinsic apoptosis by mediating cleavage and activation of effector caspases responsible for the TNFRSF6/FAS mediated and TNFRSF…	NA	1	bone marrow: 67.2	dendritic cells: 107.4;NK-cells: 132.8;Plasma cells: 73.4;T-cells: 86.9
ADM	FN1	Secreted.	Secreted, extracellular space, extracellular matrix {ECO:0000305|PubMed:29100092}.	expression	0	1	S	N	1	IPA	23585227	ADM decreases expression of fibronectin [FN1] mRNA. (Original Sentence: Functionally, ADM did not affect initial differentiation of quiescent fibroblasts in response to TGF- but significantly attenuated the expression of SMA, collagen-1, and fibronectin in pre-differentiated myofibroblasts, which was accompanied by decreased contractility of myofibroblasts.)	0	1	AM and PAMP are potent hypotensive and vasodilatator agents. Numerous actions have been reported most related to the physiologic control of fluid and electrolyte homeostasis. In the kidney, am is diuretic and natriuretic, and both am and pamp inhibit aldosterone secretion by direct adrenal actions. In pituitary gland, both peptides at physiologically relevant doses inhibit basal ACTH secretion. B…	NA	1	adipose tissue: 325.1	Basal prostatic cells: 590.8;Extravillous trophoblasts: 1217.1;Syncytiotrophoblasts: 1084.8				Fibronectins bind cell surfaces and various compounds including collagen, fibrin, heparin, DNA, and actin (PubMed:3024962, PubMed:3900070, PubMed:3593230, PubMed:7989369). Fibronectins are involved in cell adhesion, cell motility, opsonization, wound healing, and maintenance of cell shape (PubMed:3024962, PubMed:3900070, PubMed:3593230, PubMed:7989369). Involved in osteoblast compaction through t…	NA	1	liver: 1740.1;placenta: 2952.1	Extravillous trophoblasts: 2583.6;Fibroblasts: 562.6;Hepatocytes: 1012.4;Smooth muscle cells: 450.2
ADM	NR4A2	Secreted.	Cytoplasm. Nucleus. Note=Mostly nuclear; oxidative stress promotes cytoplasmic localization.	expression	1	1	S/N	N, presynaptic	1	IPA	20566846	Mouse Nr4a2 protein increases expression of mouse Adm mRNA in differentiated sorted E14.1 cells. Experiment Type: microarray analysis	0	1	AM and PAMP are potent hypotensive and vasodilatator agents. Numerous actions have been reported most related to the physiologic control of fluid and electrolyte homeostasis. In the kidney, am is diuretic and natriuretic, and both am and pamp inhibit aldosterone secretion by direct adrenal actions. In pituitary gland, both peptides at physiologically relevant doses inhibit basal ACTH secretion. B…	NA	1	adipose tissue: 325.1	Basal prostatic cells: 590.8;Extravillous trophoblasts: 1217.1;Syncytiotrophoblasts: 1084.8				Transcriptional regulator which is important for the differentiation and maintenance of meso-diencephalic dopaminergic (mdDA) neurons during development. It is crucial for expression of a set of genes such as SLC6A3, SLC18A2, TH and DRD2 which are essential for development of mdDA neurons (By similarity). {ECO:0000250, ECO:0000269|PubMed:17184956}.	NA	1	adrenal gland: 130.6;bone marrow: 131.9;ovary: 130.3	B-cells: 511.7;dendritic cells: 410.4;Langerhans cells: 782.3;Macrophages: 577.5;T-cells: 465.1
ADM	OPRM1	Secreted.	Cell membrane {ECO:0000269|PubMed:10529478, ECO:0000269|PubMed:12589820, ECO:0000269|PubMed:16580639, ECO:0000269|PubMed:7891175, ECO:0000269|PubMed:7905839, ECO:0000269|PubMed:7957926, ECO:0000269|PubMed:9689128}; Multi-pass membrane protein {ECO:0000269|PubMed:16580639}. Cell projection, axon {ECO:0000250|UniProtKB:P97266}. Perikaryon {ECO:0000250|UniProtKB:P97266}. Cell projection, dendrite {E…	expression	1	1	S/CM	N, presynaptic	1	IPA	20844145	Rat Mor [Oprm1] protein is necessary for expression of rat Adrenomedullin [product of Adm] protein in explanted rat ganglion that is increased by morphine. Experiment Type: ELISA	0	1	AM and PAMP are potent hypotensive and vasodilatator agents. Numerous actions have been reported most related to the physiologic control of fluid and electrolyte homeostasis. In the kidney, am is diuretic and natriuretic, and both am and pamp inhibit aldosterone secretion by direct adrenal actions. In pituitary gland, both peptides at physiologically relevant doses inhibit basal ACTH secretion. B…	NA	1	adipose tissue: 325.1	Basal prostatic cells: 590.8;Extravillous trophoblasts: 1217.1;Syncytiotrophoblasts: 1084.8				Receptor for endogenous opioids such as beta-endorphin and endomorphin. Receptor for natural and synthetic opioids including morphine, heroin, DAMGO, fentanyl, etorphine, buprenorphin and methadone (PubMed:7905839, PubMed:7957926, PubMed:7891175, PubMed:12589820, PubMed:9689128). Agonist binding to the receptor induces coupling to an inactive GDP-bound heterotrimeric G-protein complex and subsequ…	NA	1	brain: 8.4;testis: 2.9	Early spermatids: 29.2;Excitatory neurons: 41.1;Inhibitory neurons: 23.5;Late spermatids: 29.7;Microglial cells: 10.3
ADM	TCOF1	Secreted.	Nucleus, nucleolus {ECO:0000269|PubMed:12777385}.	expression	1	1	0	0	0	IPA	0	0	0	0	AM and PAMP are potent hypotensive and vasodilatator agents. Numerous actions have been reported most related to the physiologic control of fluid and electrolyte homeostasis. In the kidney, am is diuretic and natriuretic, and both am and pamp inhibit aldosterone secretion by direct adrenal actions. In pituitary gland, both peptides at physiologically relevant doses inhibit basal ACTH secretion. B…	NA	1	adipose tissue: 325.1	Basal prostatic cells: 590.8;Extravillous trophoblasts: 1217.1;Syncytiotrophoblasts: 1084.8				Nucleolar protein that acts as a regulator of RNA polymerase I by connecting RNA polymerase I with enzymes responsible for ribosomal processing and modification (PubMed:12777385, PubMed:26399832). Required for neural crest specification: following monoubiquitination by the BCR(KBTBD8) complex, associates with NOLC1 and acts as a platform to connect RNA polymerase I with enzymes responsible for ri…	NA	1	brain: 105.6
ADM	TEAD2	Secreted.	Nucleus.	expression	1	1	0	0	0	IPA	0	0	0	0	AM and PAMP are potent hypotensive and vasodilatator agents. Numerous actions have been reported most related to the physiologic control of fluid and electrolyte homeostasis. In the kidney, am is diuretic and natriuretic, and both am and pamp inhibit aldosterone secretion by direct adrenal actions. In pituitary gland, both peptides at physiologically relevant doses inhibit basal ACTH secretion. B…	NA	1	adipose tissue: 325.1	Basal prostatic cells: 590.8;Extravillous trophoblasts: 1217.1;Syncytiotrophoblasts: 1084.8				Transcription factor which plays a key role in the Hippo signaling pathway, a pathway involved in organ size control and tumor suppression by restricting proliferation and promoting apoptosis. The core of this pathway is composed of a kinase cascade wherein MST1/MST2, in complex with its regulatory protein SAV1, phosphorylates and activates LATS1/2 in complex with its regulatory protein MOB1, whi…	NA	1		Ductal cells: 51.1;Early spermatids: 76.6
ADM	TRAF3	Secreted.	Cytoplasm {ECO:0000305}. Endosome {ECO:0000250|UniProtKB:Q60803}. Mitochondrion. Note=Undergoes endocytosis together with TLR4 upon LPS signaling (By similarity). Associated with mitochondria in response to virus. {ECO:0000250|UniProtKB:Q60803}.	expression	1	1	0	0	0	IPA	0	0	0	0	AM and PAMP are potent hypotensive and vasodilatator agents. Numerous actions have been reported most related to the physiologic control of fluid and electrolyte homeostasis. In the kidney, am is diuretic and natriuretic, and both am and pamp inhibit aldosterone secretion by direct adrenal actions. In pituitary gland, both peptides at physiologically relevant doses inhibit basal ACTH secretion. B…	NA	1	adipose tissue: 325.1	Basal prostatic cells: 590.8;Extravillous trophoblasts: 1217.1;Syncytiotrophoblasts: 1084.8				Regulates pathways leading to the activation of NF-kappa-B and MAP kinases, and plays a central role in the regulation of B-cell survival. Part of signaling pathways leading to the production of cytokines and interferon. Required for normal antibody isotype switching from IgM to IgG. Plays a role T-cell dependent immune responses. Plays a role in the regulation of antiviral responses. Is an essen…	NA	1		Excitatory neurons: 108.3
ADRM1	CCDC92	Cytoplasm {ECO:0000269|PubMed:16990800}. Nucleus {ECO:0000269|PubMed:16990800}.	Cytoplasm, cytoskeleton, microtubule organizing center, centrosome, centriole {ECO:0000269|PubMed:22863007}. Cytoplasm {ECO:0000269|PubMed:32528005}.	protein-protein interactions	1	1	C	N	1	IPA	28514442	Binding of human ADRM1 protein and human CCDC92 protein occurs.	0	1	Component of the 26S proteasome, a multiprotein complex involved in the ATP-dependent degradation of ubiquitinated proteins. This complex plays a key role in the maintenance of protein homeostasis by removing misfolded or damaged proteins, which could impair cellular functions, and by removing proteins whose functions are no longer required. Therefore, the proteasome participates in numerous cell…	NA	1	skeletal muscle: 372.5	Late spermatids: 1655.0				Interferon-stimulated protein that plays a role in innate immunity. Strongly inhibits ebolavirus transcription and replication. Forms a complex with viral RNA-bound nucleocapsid NP and thereby prevents the transport of NP to the cell surface. {ECO:0000269|PubMed:32528005}.	NA	1		Early spermatids: 89.2;Excitatory neurons: 123.0;Inhibitory neurons: 106.1
ADRM1	EGFR	Cytoplasm {ECO:0000269|PubMed:16990800}. Nucleus {ECO:0000269|PubMed:16990800}.	Cell membrane {ECO:0000269|PubMed:17182860, ECO:0000269|PubMed:20462955, ECO:0000269|PubMed:23589287, ECO:0000269|PubMed:27153536, ECO:0000269|PubMed:2790960}; Single-pass type I membrane protein {ECO:0000269|PubMed:27153536}. Endoplasmic reticulum membrane {ECO:0000269|PubMed:27153536}; Single-pass type I membrane protein. Golgi apparatus membrane; Single-pass type I membrane protein. Nucleus me…	protein-protein interactions	1	1	0	0	0	IPA	0	0	0	0	Component of the 26S proteasome, a multiprotein complex involved in the ATP-dependent degradation of ubiquitinated proteins. This complex plays a key role in the maintenance of protein homeostasis by removing misfolded or damaged proteins, which could impair cellular functions, and by removing proteins whose functions are no longer required. Therefore, the proteasome participates in numerous cell…	NA	1	skeletal muscle: 372.5	Late spermatids: 1655.0				Receptor tyrosine kinase binding ligands of the EGF family and activating several signaling cascades to convert extracellular cues into appropriate cellular responses (PubMed:2790960, PubMed:10805725, PubMed:27153536). Known ligands include EGF, TGFA/TGF-alpha, AREG, epigen/EPGN, BTC/betacellulin, epiregulin/EREG and HBEGF/heparin-binding EGF (PubMed:2790960, PubMed:7679104, PubMed:8144591, PubMe…	NA	1	placenta: 68.5	Cytotrophoblasts: 287.9;Skeletal myocytes: 251.2;Syncytiotrophoblasts: 376.8
ADRM1	LMBR1L	Cytoplasm {ECO:0000269|PubMed:16990800}. Nucleus {ECO:0000269|PubMed:16990800}.	Cell membrane {ECO:0000269|PubMed:11287427, ECO:0000269|PubMed:17991420, ECO:0000269|PubMed:31073040}; Multi-pass membrane protein {ECO:0000269|PubMed:11287427}. Endoplasmic reticulum membrane {ECO:0000269|PubMed:31073040}; Multi-pass membrane protein {ECO:0000255}.	protein-protein interactions	1	1	CM/C	N	1	IPA	31073040	Binding of human ADRM1 protein and human LMBR1L protein occurs. Experiment Type: affinity chromatography	0	1	Component of the 26S proteasome, a multiprotein complex involved in the ATP-dependent degradation of ubiquitinated proteins. This complex plays a key role in the maintenance of protein homeostasis by removing misfolded or damaged proteins, which could impair cellular functions, and by removing proteins whose functions are no longer required. Therefore, the proteasome participates in numerous cell…	NA	1	skeletal muscle: 372.5	Late spermatids: 1655.0				Plays an essential role in lymphocyte development by negatively regulating the canonical Wnt signaling pathway (By similarity). In association with UBAC2 and E3 ubiquitin-protein ligase AMFR, promotes the ubiquitin-mediated degradation of CTNNB1 and Wnt receptors FZD6 and LRP6 (By similarity). LMBR1L stabilizes the beta-catenin destruction complex that is required for regulating CTNNB1 levels (By…	NA	1		Granulosa cells: 722.7
ADRM1	PSMD14	Cytoplasm {ECO:0000269|PubMed:16990800}. Nucleus {ECO:0000269|PubMed:16990800}.	NA; Cytosol, cytosolic proteasome complex, Extracellular region or secreted, Nucleus, nucleoplasm	protein-protein interactions	0	1	C	N	1	IPA	26496610	Binding of human ADRM1 protein and human PSMD14 protein occurs. Experiment Type: affinity chromatography	0	0	Component of the 26S proteasome, a multiprotein complex involved in the ATP-dependent degradation of ubiquitinated proteins. This complex plays a key role in the maintenance of protein homeostasis by removing misfolded or damaged proteins, which could impair cellular functions, and by removing proteins whose functions are no longer required. Therefore, the proteasome participates in numerous cell…	NA	1	skeletal muscle: 372.5	Late spermatids: 1655.0				Component of the 26S proteasome, a multiprotein complex involved in the ATP-dependent degradation of ubiquitinated proteins. This complex plays a key role in the maintenance of protein homeostasis by removing misfolded or damaged proteins, which could impair cellular functions, and by removing proteins whose functions are no longer required. Therefore, the proteasome participates in numerous cell…	NA	1
ADRM1	PSMD7	Cytoplasm {ECO:0000269|PubMed:16990800}. Nucleus {ECO:0000269|PubMed:16990800}.	NA; Cytosol, Extracellular region or secreted, Nucleus, nucleoplasm	protein-protein interactions	1	1	C	N	1	IPA	28514442	Binding of human ADRM1 protein and human PSMD7 protein occurs. Experiment Type: affinity chromatography	0	1	Component of the 26S proteasome, a multiprotein complex involved in the ATP-dependent degradation of ubiquitinated proteins. This complex plays a key role in the maintenance of protein homeostasis by removing misfolded or damaged proteins, which could impair cellular functions, and by removing proteins whose functions are no longer required. Therefore, the proteasome participates in numerous cell…	NA	1	skeletal muscle: 372.5	Late spermatids: 1655.0				Component of the 26S proteasome, a multiprotein complex involved in the ATP-dependent degradation of ubiquitinated proteins. This complex plays a key role in the maintenance of protein homeostasis by removing misfolded or damaged proteins, which could impair cellular functions, and by removing proteins whose functions are no longer required. Therefore, the proteasome participates in numerous cell…	NA	1		Syncytiotrophoblasts: 596.1
ADRM1	TNIP2	Cytoplasm {ECO:0000269|PubMed:16990800}. Nucleus {ECO:0000269|PubMed:16990800}.	Cytoplasm {ECO:0000269|PubMed:12595760}. Nucleus {ECO:0000305}.	protein-protein interactions	1	1	0	0	0	IPA	0	0	0	0	Component of the 26S proteasome, a multiprotein complex involved in the ATP-dependent degradation of ubiquitinated proteins. This complex plays a key role in the maintenance of protein homeostasis by removing misfolded or damaged proteins, which could impair cellular functions, and by removing proteins whose functions are no longer required. Therefore, the proteasome participates in numerous cell…	NA	1	skeletal muscle: 372.5	Late spermatids: 1655.0				Inhibits NF-kappa-B activation by blocking the interaction of RIPK1 with its downstream effector NEMO/IKBKG. Forms a ternary complex with NFKB1 and MAP3K8 but appears to function upstream of MAP3K8 in the TLR4 signaling pathway that regulates MAP3K8 activation. Involved in activation of the MEK/ERK signaling pathway during innate immune response; this function seems to be stimulus- and cell type …	NA	1		Proximal enterocytes: 174.3
ADSL	ACO2	NA; cytosol	Mitochondrion {ECO:0000250|UniProtKB:P16276}.	protein-protein interactions	0	0	0	0	0	IPA	27684187	Binding of human ACO2 protein and human ADSL protein occurs. Experiment Type: affinity chromatography	1	1	Catalyzes two non-sequential steps in de novo AMP synthesis: converts (S)-2-(5-amino-1-(5-phospho-D-ribosyl)imidazole-4-carboxamido)succinate (SAICAR) to fumarate plus 5-amino-1-(5-phospho-D-ribosyl)imidazole-4-carboxamide, and thereby also contributes to de novo IMP synthesis, and converts succinyladenosine monophosphate (SAMP) to AMP and fumarate. {ECO:0000269|PubMed:10888601}.	NA	1	skeletal muscle: 348.4;tongue: 244.4					Catalyzes the isomerization of citrate to isocitrate via cis-aconitate. {ECO:0000250|UniProtKB:P16276}.	[4Fe-4S] cluster; Xref=ChEBI:CHEBI:49883; Evidence={ECO:0000250|UniProtKB:P16276}; Note=Binds 1 [4Fe-4S] cluster per subunit. Binding of a [3Fe-4S] cluster leads to an inactive enzyme. {ECO:0000250|UniProtKB:P16276};	1	heart muscle: 477.5;skeletal muscle: 666.7;tongue: 701.9	Proximal enterocytes: 374.2;Proximal tubular cells: 285.7
ADSL	CENPJ	NA; cytosol	Cytoplasm, cytoskeleton, microtubule organizing center, centrosome {ECO:0000269|PubMed:11003675, ECO:0000269|PubMed:14654843, ECO:0000269|PubMed:20531387}. Cytoplasm, cytoskeleton, microtubule organizing center, centrosome, centriole {ECO:0000269|PubMed:17681131, ECO:0000269|PubMed:20531387, ECO:0000269|PubMed:22020124}. Note=Localized within the center of microtubule asters (PubMed:11003675). Du…	protein-protein interactions	1	1	C	N	1	IPA	26638075	Binding of human ADSL protein and human CENPJ protein occurs.	1	0	Catalyzes two non-sequential steps in de novo AMP synthesis: converts (S)-2-(5-amino-1-(5-phospho-D-ribosyl)imidazole-4-carboxamido)succinate (SAICAR) to fumarate plus 5-amino-1-(5-phospho-D-ribosyl)imidazole-4-carboxamide, and thereby also contributes to de novo IMP synthesis, and converts succinyladenosine monophosphate (SAMP) to AMP and fumarate. {ECO:0000269|PubMed:10888601}.	NA	1	skeletal muscle: 348.4;tongue: 244.4					Plays an important role in cell division and centrosome function by participating in centriole duplication (PubMed:17681131, PubMed:20531387). Inhibits microtubule nucleation from the centrosome. Involved in the regulation of slow processive growth of centriolar microtubules. Acts as microtubule plus-end tracking protein that stabilizes centriolar microtubules and inhibits microtubule polymerizat…	NA	1	testis: 16.4	Early spermatids: 135.8;Spermatocytes: 63.5
ADSL	CEP128	NA; cytosol	Cytoplasm, cytoskeleton, microtubule organizing center, centrosome {ECO:0000269|PubMed:14654843}. Cytoplasm, cytoskeleton, microtubule organizing center, centrosome, centriole {ECO:0000269|PubMed:21399614}. Cytoplasm, cytoskeleton, spindle pole {ECO:0000269|PubMed:21399614}. Note=Associates with the mother centriole.	protein-protein interactions	1	1	CS	A	1	IPA	26638075	Binding of human ADSL protein and human CEP128 protein occurs.	1	1	Catalyzes two non-sequential steps in de novo AMP synthesis: converts (S)-2-(5-amino-1-(5-phospho-D-ribosyl)imidazole-4-carboxamido)succinate (SAICAR) to fumarate plus 5-amino-1-(5-phospho-D-ribosyl)imidazole-4-carboxamide, and thereby also contributes to de novo IMP synthesis, and converts succinyladenosine monophosphate (SAMP) to AMP and fumarate. {ECO:0000269|PubMed:10888601}.	NA	1	skeletal muscle: 348.4;tongue: 244.4					NA	NA	1	lymphoid tissue: 25.1	Astrocytes: 40.1;Microglial cells: 46.9;Oligodendrocyte precursor cells: 37.7;Oligodendrocytes: 71.0;Plasma cells: 81.1
ADSL	GNB1L	NA; cytosol	NA; Plasma Membrane, cytoplasmic side of plasma membrane	protein-protein interactions	1	1	0	0	0	IPA	0	0	1	0	Catalyzes two non-sequential steps in de novo AMP synthesis: converts (S)-2-(5-amino-1-(5-phospho-D-ribosyl)imidazole-4-carboxamido)succinate (SAICAR) to fumarate plus 5-amino-1-(5-phospho-D-ribosyl)imidazole-4-carboxamide, and thereby also contributes to de novo IMP synthesis, and converts succinyladenosine monophosphate (SAMP) to AMP and fumarate. {ECO:0000269|PubMed:10888601}.	NA	1	skeletal muscle: 348.4;tongue: 244.4					NA; This gene encodes a G-protein beta-subunit-like polypeptide which is a member of the WD repeat protein family. WD repeats are minimally conserved regions of approximately 40 amino acids typically bracketed by gly-his and trp-asp (GH-WD), which may facilitate formation of heterotrimeric or multiprotein complexes. Members of this family are involved in a variety of cellular processes, including…	NA	1		Early spermatids: 28.3
ADSL	SLC25A1	NA; cytosol	Mitochondrion inner membrane {ECO:0000250|UniProtKB:Q8JZU2}; Multi-pass membrane protein {ECO:0000255}.	protein-protein interactions	1	0	0	0	0	IPA	0	0	1	0	Catalyzes two non-sequential steps in de novo AMP synthesis: converts (S)-2-(5-amino-1-(5-phospho-D-ribosyl)imidazole-4-carboxamido)succinate (SAICAR) to fumarate plus 5-amino-1-(5-phospho-D-ribosyl)imidazole-4-carboxamide, and thereby also contributes to de novo IMP synthesis, and converts succinyladenosine monophosphate (SAMP) to AMP and fumarate. {ECO:0000269|PubMed:10888601}.	NA	1	skeletal muscle: 348.4;tongue: 244.4					Citrate transporter that mediates the exchange of mitochondrial citrate for cytosolic malate (PubMed:29031613, PubMed:29238895). Also able to mediate the exchange of citrate for isocitrate, phosphoenolpyruvate, cis- but not trans-aconitate and to a lesser extend maleate and succinate (PubMed:29031613). Important for the bioenergetics of hepatic cells as it provides a carbon source for fatty acid …	NA	1	liver: 199.3	Hepatocytes: 221.1;Proximal enterocytes: 304.3
ADSL	USP4	NA; cytosol	Cytoplasm {ECO:0000269|PubMed:16316627, ECO:0000269|PubMed:20595234}. Nucleus {ECO:0000269|PubMed:16316627, ECO:0000269|PubMed:20595234}. Note=Shuttles between the nucleus and cytoplasm. Exported to the cytoplasm in a CRM1-dependent manner and recycled back to the nucleus via the importin alpha/beta heterodimeric import receptor. The relative amounts found in the nucleus and cytoplasm vary accord…	protein-protein interactions	1	1	C	N	1	IPA	19615732	Binding of human ADSL protein and human USP4 protein occurs.	1	0	Catalyzes two non-sequential steps in de novo AMP synthesis: converts (S)-2-(5-amino-1-(5-phospho-D-ribosyl)imidazole-4-carboxamido)succinate (SAICAR) to fumarate plus 5-amino-1-(5-phospho-D-ribosyl)imidazole-4-carboxamide, and thereby also contributes to de novo IMP synthesis, and converts succinyladenosine monophosphate (SAMP) to AMP and fumarate. {ECO:0000269|PubMed:10888601}.	NA	1	skeletal muscle: 348.4;tongue: 244.4					Deubiquitinating enzyme that removes conjugated ubiquitin from target proteins (PubMed:16316627, PubMed:16472766, PubMed:16339847, PubMed:20595234, PubMed:22347420, PubMed:25404403). Deubiquitinates PDPK1 (PubMed:22347420). Deubiquitinates TRIM21 (PubMed:16316627). Deubiquitinates receptor ADORA2A which increases the amount of functional receptor at the cell surface (PubMed:16339847). May regulat…	NA	1		Early spermatids: 131.8;Late spermatids: 104.9
AEBP1	MAPK3	[Isoform 1]: Secreted {ECO:0000250|UniProtKB:Q640N1}.; [Isoform 2]: Cytoplasm {ECO:0000250|UniProtKB:Q640N1}. Nucleus {ECO:0000250|UniProtKB:Q640N1}.	Cytoplasm {ECO:0000250|UniProtKB:P21708}. Nucleus. Membrane, caveola {ECO:0000250|UniProtKB:P21708}. Cell junction, focal adhesion {ECO:0000250|UniProtKB:Q63844}. Note=Autophosphorylation at Thr-207 promotes nuclear localization (PubMed:19060905). PEA15-binding redirects the biological outcome of MAPK3 kinase-signaling by sequestering MAPK3 into the cytoplasm (By similarity). {ECO:0000250|UniProt…	protein-protein interactions	1	1	C	N	1	IPA	11152475	Binding of AEBP1 protein and ERK1 [MAPK3] protein occurs in Cos-7 cells and in 3T3-L1 cells.	1	0	[Isoform 1]: As a positive regulator of collagen fibrillogenesis, it is probably involved in the organization and remodeling of the extracellular matrix. {ECO:0000269|PubMed:29606302}.; [Isoform 2]: May positively regulate MAP-kinase activity in adipocytes, leading to enhanced adipocyte proliferation and reduced adipocyte differentiation. May also positively regulate NF-kappa-B activity in macrop…	NA	1		Endometrial stromal cells: 103.0;Fibroblasts: 263.2;Leydig cells: 151.6;Peritubular cells: 508.9;Smooth muscle cells: 173.4			spinal cord: 57.6	Serine/threonine kinase which acts as an essential component of the MAP kinase signal transduction pathway. MAPK1/ERK2 and MAPK3/ERK1 are the 2 MAPKs which play an important role in the MAPK/ERK cascade. They participate also in a signaling cascade initiated by activated KIT and KITLG/SCF. Depending on the cellular context, the MAPK/ERK cascade mediates diverse biological functions such as cell g…	Mg(2+); Xref=ChEBI:CHEBI:18420; Evidence={ECO:0000250};	1		Distal enterocytes: 336.9;Early spermatids: 267.2;Proximal enterocytes: 235.6
AFF3	BHLHE40	Nucleus.	Cytoplasm {ECO:0000269|PubMed:21829689}. Nucleus {ECO:0000269|PubMed:11278694, ECO:0000269|PubMed:21829689, ECO:0000269|PubMed:28797635}. Note=Predominantly localized in the nucleus (PubMed:11278694). {ECO:0000269|PubMed:11278694}.	expression	1	1	0	0	0	IPA	0	0	0	0	Putative transcription activator that may function in lymphoid development and oncogenesis. Binds, in vitro, to double-stranded DNA.	NA	1		B-cells: 154.9;Excitatory neurons: 491.3;Inhibitory neurons: 300.7;Oligodendrocyte precursor cells: 211.6				Transcriptional repressor involved in the regulation of the circadian rhythm by negatively regulating the activity of the clock genes and clock-controlled genes (PubMed:12397359, PubMed:18411297). Acts as the negative limb of a novel autoregulatory feedback loop (DEC loop) which differs from the one formed by the PER and CRY transcriptional repressors (PER/CRY loop) (PubMed:14672706). Both these …	NA	1		Glandular and luminal cells: 386.7;granulocytes: 439.2;Squamous epithelial cells: 517.2
AGBL4	RICTOR	Cytoplasm, cytosol {ECO:0000250|UniProtKB:Q09LZ8}. Cytoplasm, cytoskeleton, microtubule organizing center, centrosome, centriole {ECO:0000269|PubMed:23085998}. Golgi apparatus {ECO:0000269|PubMed:23085998}. Cytoplasm, cytoskeleton, cilium basal body {ECO:0000269|PubMed:23085998}. Note=Colocalizes with gamma-tubulin in the centrioles at interphase and dividing cells and with glutamylated tubulin i…	NA; Cytosol	protein-protein interactions		1	CS	N, presynaptic	1	IPA	33961781	Binding of human AGBL4 protein and human RICTOR protein occurs. Experiment Type: affinity chromatography	1	0	Metallocarboxypeptidase that mediates protein deglutamylation of tubulin and non-tubulin target proteins. Catalyzes the removal of polyglutamate side chains present on the gamma-carboxyl group of glutamate residues within the C-terminal tail of tubulin protein. Specifically cleaves tubulin long-side-chains, while it is not able to remove the branching point glutamate. Also catalyzes the removal o…	Zn(2+); Xref=ChEBI:CHEBI:29105; Evidence={ECO:0000250|UniProtKB:P00730}; Note=Binds 1 zinc ion per subunit. {ECO:0000250|UniProtKB:P00730};	1	brain: 5.9;retina: 6.0	Excitatory neurons: 1232.8;Inhibitory neurons: 630.3				Subunit of mTORC2, which regulates cell growth and survival in response to hormonal signals. mTORC2 is activated by growth factors, but, in contrast to mTORC1, seems to be nutrient-insensitive. mTORC2 seems to function upstream of Rho GTPases to regulate the actin cytoskeleton, probably by activating one or more Rho-type guanine nucleotide exchange factors. mTORC2 promotes the serum-induced forma…	NA	1		Oligodendrocyte precursor cells: 258.9;Oligodendrocytes: 343.1
AGBL4	TUBA1B	Cytoplasm, cytosol {ECO:0000250|UniProtKB:Q09LZ8}. Cytoplasm, cytoskeleton, microtubule organizing center, centrosome, centriole {ECO:0000269|PubMed:23085998}. Golgi apparatus {ECO:0000269|PubMed:23085998}. Cytoplasm, cytoskeleton, cilium basal body {ECO:0000269|PubMed:23085998}. Note=Colocalizes with gamma-tubulin in the centrioles at interphase and dividing cells and with glutamylated tubulin i…	Cytoplasm, cytoskeleton.	protein-protein interactions		1	CS	N, presynaptic	1	IPA	33961781	Binding of human AGBL4 protein and human TUBA1B protein occurs. Experiment Type: affinity chromatography	1	1	Metallocarboxypeptidase that mediates protein deglutamylation of tubulin and non-tubulin target proteins. Catalyzes the removal of polyglutamate side chains present on the gamma-carboxyl group of glutamate residues within the C-terminal tail of tubulin protein. Specifically cleaves tubulin long-side-chains, while it is not able to remove the branching point glutamate. Also catalyzes the removal o…	Zn(2+); Xref=ChEBI:CHEBI:29105; Evidence={ECO:0000250|UniProtKB:P00730}; Note=Binds 1 zinc ion per subunit. {ECO:0000250|UniProtKB:P00730};	1	brain: 5.9;retina: 6.0	Excitatory neurons: 1232.8;Inhibitory neurons: 630.3				Tubulin is the major constituent of microtubules. It binds two moles of GTP, one at an exchangeable site on the beta chain and one at a non-exchangeable site on the alpha chain.	NA	1		Erythroid cells: 2143.3;Extravillous trophoblasts: 2555.5;Hofbauer cells: 2114.8
AGRN	ANK3	[Isoform 1]: Secreted, extracellular space, extracellular matrix {ECO:0000269|PubMed:20551380}. Note=Synaptic basal lamina at the neuromuscular junction. {ECO:0000250|UniProtKB:P31696}.; [Isoform 2]: Cell junction, synapse {ECO:0000250|UniProtKB:A2ASQ1}. Cell membrane {ECO:0000250|UniProtKB:A2ASQ1}; Single-pass type II membrane protein {ECO:0000250|UniProtKB:A2ASQ1}.	Cytoplasm, cytoskeleton {ECO:0000269|PubMed:21223964}. Cell projection, axon {ECO:0000250|UniProtKB:O70511}. Cell membrane, sarcolemma {ECO:0000269|PubMed:21223964}. Cell junction, synapse, postsynaptic cell membrane {ECO:0000250|UniProtKB:O70511}. Lysosome {ECO:0000250|UniProtKB:G5E8K5}. Cell membrane, sarcolemma, T-tubule {ECO:0000250|UniProtKB:O70511}. Note=In skeletal muscle, localized at cos…	protein-protein interactions	1	1	CM/CS	N	1	IPA	29872149	Binding of human AGRN protein and human ANK3 protein occurs.	1	0	[Isoform 1]: heparan sulfate basal lamina glycoprotein that plays a central role in the formation and the maintenance of the neuromuscular junction (NMJ) and directs key events in postsynaptic differentiation. Component of the AGRN-LRP4 receptor complex that induces the phosphorylation and activation of MUSK. The activation of MUSK in myotubes induces the formation of NMJ by regulating different …	NA	1		Basal respiratory cells: 94.5;Collecting duct cells: 156.3;Ductal cells: 91.2;Pancreatic endocrine cells: 87.3				In skeletal muscle, required for costamere localization of DMD and betaDAG1 (By similarity). Membrane-cytoskeleton linker. May participate in the maintenance/targeting of ion channels and cell adhesion molecules at the nodes of Ranvier and axonal initial segments. Regulates KCNA1 channel activity in function of dietary Mg(2+) levels, and thereby contributes to the regulation of renal Mg(2+) reabs…	NA	1		Bipolar cells: 490.2;Excitatory neurons: 859.2;Inhibitory neurons: 881.3;Oligodendrocyte precursor cells: 592.6;Oligodendrocytes: 1579.5
AGRN	ATN1	[Isoform 1]: Secreted, extracellular space, extracellular matrix {ECO:0000269|PubMed:20551380}. Note=Synaptic basal lamina at the neuromuscular junction. {ECO:0000250|UniProtKB:P31696}.; [Isoform 2]: Cell junction, synapse {ECO:0000250|UniProtKB:A2ASQ1}. Cell membrane {ECO:0000250|UniProtKB:A2ASQ1}; Single-pass type II membrane protein {ECO:0000250|UniProtKB:A2ASQ1}.	Nucleus. Cytoplasm, perinuclear region. Cell junction {ECO:0000250|UniProtKB:P54258}. Note=Shuttles between nucleus and cytoplasm. Colocalizes with FAT1 in the perinuclear area, at cell-cell junctions and leading edges of cells (By similarity). Colocalizes with MTG8 in discrete nuclear dots. Proteolytic fragment F1 appears to remain in nucleus. Fragment F2 is exported into the cytoplasm. Fragment…	protein-protein interactions	1	1	CM/S	N	1	IPA	16713569	Binding of human AGRN protein and human ATN1 protein occurs.	1	0	[Isoform 1]: heparan sulfate basal lamina glycoprotein that plays a central role in the formation and the maintenance of the neuromuscular junction (NMJ) and directs key events in postsynaptic differentiation. Component of the AGRN-LRP4 receptor complex that induces the phosphorylation and activation of MUSK. The activation of MUSK in myotubes induces the formation of NMJ by regulating different …	NA	1		Basal respiratory cells: 94.5;Collecting duct cells: 156.3;Ductal cells: 91.2;Pancreatic endocrine cells: 87.3				Transcriptional corepressor. Recruits NR2E1 to repress transcription. Promotes vascular smooth cell (VSMC) migration and orientation (By similarity). Corepressor of MTG8 transcriptional repression. Has some intrinsic repression activity which is independent of the number of poly-Gln (polyQ) repeats. {ECO:0000250|UniProtKB:O35126, ECO:0000269|PubMed:10085113, ECO:0000269|PubMed:10973986}.	NA	1
AGRN	CKB	[Isoform 1]: Secreted, extracellular space, extracellular matrix {ECO:0000269|PubMed:20551380}. Note=Synaptic basal lamina at the neuromuscular junction. {ECO:0000250|UniProtKB:P31696}.; [Isoform 2]: Cell junction, synapse {ECO:0000250|UniProtKB:A2ASQ1}. Cell membrane {ECO:0000250|UniProtKB:A2ASQ1}; Single-pass type II membrane protein {ECO:0000250|UniProtKB:A2ASQ1}.	Cytoplasm, cytosol {ECO:0000250|UniProtKB:Q04447}. Mitochondrion {ECO:0000250|UniProtKB:Q04447}. Note=Localizes to the mitochondria of thermogenic fat cells via the internal MTS-like signal (iMTS-L) region. {ECO:0000250|UniProtKB:Q04447}.	protein-protein interactions	1	1	CM/C	N	1	IPA	29872149	Binding of human AGRN protein and human CKB protein occurs.	1	1	[Isoform 1]: heparan sulfate basal lamina glycoprotein that plays a central role in the formation and the maintenance of the neuromuscular junction (NMJ) and directs key events in postsynaptic differentiation. Component of the AGRN-LRP4 receptor complex that induces the phosphorylation and activation of MUSK. The activation of MUSK in myotubes induces the formation of NMJ by regulating different …	NA	1		Basal respiratory cells: 94.5;Collecting duct cells: 156.3;Ductal cells: 91.2;Pancreatic endocrine cells: 87.3				Reversibly catalyzes the transfer of phosphate between ATP and various phosphogens (e.g. creatine phosphate) (PubMed:8186255). Creatine kinase isoenzymes play a central role in energy transduction in tissues with large, fluctuating energy demands, such as skeletal muscle, heart, brain and spermatozoa (Probable). Acts as a key regulator of adaptive thermogenesis as part of the futile creatine cycl…	NA	1	brain: 700.3	Bipolar cells: 2767.4;Distal enterocytes: 4691.8;Distal tubular cells: 2281.3;Horizontal cells: 5042.4;Muller glia cells: 3639.8;Rod photoreceptor cells: 3789.9
AGRN	COL4A2	[Isoform 1]: Secreted, extracellular space, extracellular matrix {ECO:0000269|PubMed:20551380}. Note=Synaptic basal lamina at the neuromuscular junction. {ECO:0000250|UniProtKB:P31696}.; [Isoform 2]: Cell junction, synapse {ECO:0000250|UniProtKB:A2ASQ1}. Cell membrane {ECO:0000250|UniProtKB:A2ASQ1}; Single-pass type II membrane protein {ECO:0000250|UniProtKB:A2ASQ1}.	Secreted, extracellular space, extracellular matrix, basement membrane.	protein-protein interactions	1	1	CM/S	N	1	IPA	29872149	Binding of human AGRN protein and human COL4A2 protein occurs.	1	0	[Isoform 1]: heparan sulfate basal lamina glycoprotein that plays a central role in the formation and the maintenance of the neuromuscular junction (NMJ) and directs key events in postsynaptic differentiation. Component of the AGRN-LRP4 receptor complex that induces the phosphorylation and activation of MUSK. The activation of MUSK in myotubes induces the formation of NMJ by regulating different …	NA	1		Basal respiratory cells: 94.5;Collecting duct cells: 156.3;Ductal cells: 91.2;Pancreatic endocrine cells: 87.3				Type IV collagen is the major structural component of glomerular basement membranes (GBM), forming a 'chicken-wire' meshwork together with laminins, proteoglycans and entactin/nidogen.; Canstatin, a cleavage product corresponding to the collagen alpha 2(IV) NC1 domain, possesses both anti-angiogenic and anti-tumor cell activity. It inhibits proliferation and migration of endothelial cells, reduce…	NA	1	placenta: 478.0	Adipocytes: 313.6;Endometrial stromal cells: 308.3;Endothelial cells: 278.2;Extravillous trophoblasts: 512.9;Granulosa cells: 223.8;Sertoli cells: 374.7;Smooth muscle cells: 338.9
AGRN	DCAF1	[Isoform 1]: Secreted, extracellular space, extracellular matrix {ECO:0000269|PubMed:20551380}. Note=Synaptic basal lamina at the neuromuscular junction. {ECO:0000250|UniProtKB:P31696}.; [Isoform 2]: Cell junction, synapse {ECO:0000250|UniProtKB:A2ASQ1}. Cell membrane {ECO:0000250|UniProtKB:A2ASQ1}; Single-pass type II membrane protein {ECO:0000250|UniProtKB:A2ASQ1}.	Cytoplasm. Nucleus. Note=Associated with chromatin in a DDB1-independent and cell cycle-dependent manner: recruited to chromatin as DNA is being replicated and is released from chromatin before mitosis.	protein-protein interactions	1	1	CM/C	N	1	IPA	28514442	Association of human AGRN protein and human AP3M1 protein and human CHD1 protein and human DCAF1 protein and human DDA1 protein and human GTF2I protein and human KPNA4 protein and human NF2 protein and human NF2 protein and human SDC1 protein and human SDC4 protein and human SRRM2 protein and human ZRANB2 protein occurs.	1	0	[Isoform 1]: heparan sulfate basal lamina glycoprotein that plays a central role in the formation and the maintenance of the neuromuscular junction (NMJ) and directs key events in postsynaptic differentiation. Component of the AGRN-LRP4 receptor complex that induces the phosphorylation and activation of MUSK. The activation of MUSK in myotubes induces the formation of NMJ by regulating different …	NA	1		Basal respiratory cells: 94.5;Collecting duct cells: 156.3;Ductal cells: 91.2;Pancreatic endocrine cells: 87.3				Acts both as a substrate recognition component of E3 ubiquitin-protein ligase complexes and as an atypical serine/threonine-protein kinase, playing key roles in various processes such as cell cycle, telomerase regulation and histone modification. Probable substrate-specific adapter of a DCX (DDB1-CUL4-X-box) E3 ubiquitin-protein ligase complex, named CUL4A-RBX1-DDB1-DCAF1/VPRBP complex, which med…	NA	1	testis: 53.8	Glandular and luminal cells: 17.9;Granulosa cells: 13.1
AGRN	EEF2	[Isoform 1]: Secreted, extracellular space, extracellular matrix {ECO:0000269|PubMed:20551380}. Note=Synaptic basal lamina at the neuromuscular junction. {ECO:0000250|UniProtKB:P31696}.; [Isoform 2]: Cell junction, synapse {ECO:0000250|UniProtKB:A2ASQ1}. Cell membrane {ECO:0000250|UniProtKB:A2ASQ1}; Single-pass type II membrane protein {ECO:0000250|UniProtKB:A2ASQ1}.	Cytoplasm {ECO:0000269|PubMed:25064856}. Nucleus {ECO:0000269|PubMed:24648518}. Note=Phosphorylation by CSK promotes cleavage and SUMOylation-dependent nuclear translocation of the C-terminal cleavage product. {ECO:0000269|PubMed:24648518}.	protein-protein interactions	1	1	CM/C	N	1	IPA	29872149	Binding of human AGRN protein and human EEF2 protein occurs.	1	0	[Isoform 1]: heparan sulfate basal lamina glycoprotein that plays a central role in the formation and the maintenance of the neuromuscular junction (NMJ) and directs key events in postsynaptic differentiation. Component of the AGRN-LRP4 receptor complex that induces the phosphorylation and activation of MUSK. The activation of MUSK in myotubes induces the formation of NMJ by regulating different …	NA	1		Basal respiratory cells: 94.5;Collecting duct cells: 156.3;Ductal cells: 91.2;Pancreatic endocrine cells: 87.3				Catalyzes the GTP-dependent ribosomal translocation step during translation elongation. During this step, the ribosome changes from the pre-translocational (PRE) to the post-translocational (POST) state as the newly formed A-site-bound peptidyl-tRNA and P-site-bound deacylated tRNA move to the P and E sites, respectively. Catalyzes the coordinated movement of the two tRNA molecules, the mRNA and …	NA	1
AGRN	ENO1	[Isoform 1]: Secreted, extracellular space, extracellular matrix {ECO:0000269|PubMed:20551380}. Note=Synaptic basal lamina at the neuromuscular junction. {ECO:0000250|UniProtKB:P31696}.; [Isoform 2]: Cell junction, synapse {ECO:0000250|UniProtKB:A2ASQ1}. Cell membrane {ECO:0000250|UniProtKB:A2ASQ1}; Single-pass type II membrane protein {ECO:0000250|UniProtKB:A2ASQ1}.	Cytoplasm {ECO:0000269|PubMed:10802057}. Cell membrane {ECO:0000269|PubMed:10802057}. Cytoplasm, myofibril, sarcomere, M line {ECO:0000269|PubMed:10802057}. Note=Can translocate to the plasma membrane in either the homodimeric (alpha/alpha) or heterodimeric (alpha/gamma) form. ENO1 is localized to the M line.; [Isoform MBP-1]: Nucleus.	protein-protein interactions	1	1	CM/C	N	1	IPA	29872149	Binding of human AGRN protein and human ENO1 protein occurs.	1	1	[Isoform 1]: heparan sulfate basal lamina glycoprotein that plays a central role in the formation and the maintenance of the neuromuscular junction (NMJ) and directs key events in postsynaptic differentiation. Component of the AGRN-LRP4 receptor complex that induces the phosphorylation and activation of MUSK. The activation of MUSK in myotubes induces the formation of NMJ by regulating different …	NA	1		Basal respiratory cells: 94.5;Collecting duct cells: 156.3;Ductal cells: 91.2;Pancreatic endocrine cells: 87.3				Glycolytic enzyme the catalyzes the conversion of 2-phosphoglycerate to phosphoenolpyruvate (PubMed:29775581, PubMed:1369209). In addition to glycolysis, involved in various processes such as growth control, hypoxia tolerance and allergic responses (PubMed:2005901, PubMed:10802057, PubMed:12666133, PubMed:29775581). May also function in the intravascular and pericellular fibrinolytic system due t…	Mg(2+); Xref=ChEBI:CHEBI:18420; Evidence={ECO:0000269|PubMed:18560153}; Note=Binds two Mg(2+) per subunit. Required for catalysis and for stabilizing the dimer. {ECO:0000269|PubMed:18560153};	1		Ductal cells: 2259.3;Extravillous trophoblasts: 2078.5;Muller glia cells: 2624.9
AGRN	ESR1	[Isoform 1]: Secreted, extracellular space, extracellular matrix {ECO:0000269|PubMed:20551380}. Note=Synaptic basal lamina at the neuromuscular junction. {ECO:0000250|UniProtKB:P31696}.; [Isoform 2]: Cell junction, synapse {ECO:0000250|UniProtKB:A2ASQ1}. Cell membrane {ECO:0000250|UniProtKB:A2ASQ1}; Single-pass type II membrane protein {ECO:0000250|UniProtKB:A2ASQ1}.	[Isoform 1]: Nucleus {ECO:0000255|PROSITE-ProRule:PRU00407, ECO:0000269|PubMed:12682286, ECO:0000269|PubMed:20074560}. Cytoplasm {ECO:0000269|PubMed:12682286, ECO:0000269|PubMed:24498420}. Cell membrane {ECO:0000269|PubMed:12682286}; Peripheral membrane protein {ECO:0000269|PubMed:12682286}; Cytoplasmic side {ECO:0000269|PubMed:12682286}. Note=A minor fraction is associated with the inner membran…	protein-protein interactions	1	1	CM/C	N	1	IPA	31527615	Binding of human AGRN protein and human ESR1 protein occurs.	1	0	[Isoform 1]: heparan sulfate basal lamina glycoprotein that plays a central role in the formation and the maintenance of the neuromuscular junction (NMJ) and directs key events in postsynaptic differentiation. Component of the AGRN-LRP4 receptor complex that induces the phosphorylation and activation of MUSK. The activation of MUSK in myotubes induces the formation of NMJ by regulating different …	NA	1		Basal respiratory cells: 94.5;Collecting duct cells: 156.3;Ductal cells: 91.2;Pancreatic endocrine cells: 87.3				Nuclear hormone receptor. The steroid hormones and their receptors are involved in the regulation of eukaryotic gene expression and affect cellular proliferation and differentiation in target tissues. Ligand-dependent nuclear transactivation involves either direct homodimer binding to a palindromic estrogen response element (ERE) sequence or association with other DNA-binding transcription factor…	NA	1	cervix: 84.5;endometrium 1: 111.9;fallopian tube: 65.5	Breast glandular cells: 86.6;Endometrial ciliated cells: 77.9;Endometrial stromal cells: 79.9;Glandular and luminal cells: 98.9;Hepatocytes: 52.1;Horizontal cells: 62.2;Skeletal myocytes: 56.7
AGRN	FN1	[Isoform 1]: Secreted, extracellular space, extracellular matrix {ECO:0000269|PubMed:20551380}. Note=Synaptic basal lamina at the neuromuscular junction. {ECO:0000250|UniProtKB:P31696}.; [Isoform 2]: Cell junction, synapse {ECO:0000250|UniProtKB:A2ASQ1}. Cell membrane {ECO:0000250|UniProtKB:A2ASQ1}; Single-pass type II membrane protein {ECO:0000250|UniProtKB:A2ASQ1}.	Secreted, extracellular space, extracellular matrix {ECO:0000305|PubMed:29100092}.	protein-protein interactions	1	1	CM/S	N	1	IPA	29872149	Binding of human AGRN protein and human FN1 protein occurs.	1	1	[Isoform 1]: heparan sulfate basal lamina glycoprotein that plays a central role in the formation and the maintenance of the neuromuscular junction (NMJ) and directs key events in postsynaptic differentiation. Component of the AGRN-LRP4 receptor complex that induces the phosphorylation and activation of MUSK. The activation of MUSK in myotubes induces the formation of NMJ by regulating different …	NA	1		Basal respiratory cells: 94.5;Collecting duct cells: 156.3;Ductal cells: 91.2;Pancreatic endocrine cells: 87.3				Fibronectins bind cell surfaces and various compounds including collagen, fibrin, heparin, DNA, and actin (PubMed:3024962, PubMed:3900070, PubMed:3593230, PubMed:7989369). Fibronectins are involved in cell adhesion, cell motility, opsonization, wound healing, and maintenance of cell shape (PubMed:3024962, PubMed:3900070, PubMed:3593230, PubMed:7989369). Involved in osteoblast compaction through t…	NA	1	liver: 1740.1;placenta: 2952.1	Extravillous trophoblasts: 2583.6;Fibroblasts: 562.6;Hepatocytes: 1012.4;Smooth muscle cells: 450.2
AGRN	GTF2A1	[Isoform 1]: Secreted, extracellular space, extracellular matrix {ECO:0000269|PubMed:20551380}. Note=Synaptic basal lamina at the neuromuscular junction. {ECO:0000250|UniProtKB:P31696}.; [Isoform 2]: Cell junction, synapse {ECO:0000250|UniProtKB:A2ASQ1}. Cell membrane {ECO:0000250|UniProtKB:A2ASQ1}; Single-pass type II membrane protein {ECO:0000250|UniProtKB:A2ASQ1}.	Nucleus.	protein-protein interactions	1	0	0	0	0	IPA	0	0	1	0	[Isoform 1]: heparan sulfate basal lamina glycoprotein that plays a central role in the formation and the maintenance of the neuromuscular junction (NMJ) and directs key events in postsynaptic differentiation. Component of the AGRN-LRP4 receptor complex that induces the phosphorylation and activation of MUSK. The activation of MUSK in myotubes induces the formation of NMJ by regulating different …	NA	1		Basal respiratory cells: 94.5;Collecting duct cells: 156.3;Ductal cells: 91.2;Pancreatic endocrine cells: 87.3				TFIIA is a component of the transcription machinery of RNA polymerase II and plays an important role in transcriptional activation. TFIIA in a complex with TBP mediates transcriptional activity. {ECO:0000269|PubMed:11030333, ECO:0000269|PubMed:16537915}.	NA	1
AGRN	MAPT	[Isoform 1]: Secreted, extracellular space, extracellular matrix {ECO:0000269|PubMed:20551380}. Note=Synaptic basal lamina at the neuromuscular junction. {ECO:0000250|UniProtKB:P31696}.; [Isoform 2]: Cell junction, synapse {ECO:0000250|UniProtKB:A2ASQ1}. Cell membrane {ECO:0000250|UniProtKB:A2ASQ1}; Single-pass type II membrane protein {ECO:0000250|UniProtKB:A2ASQ1}.	Cytoplasm, cytosol {ECO:0000269|PubMed:10747907, ECO:0000269|PubMed:23666762, ECO:0000269|PubMed:26014385}. Cell membrane {ECO:0000269|PubMed:10747907}; Peripheral membrane protein {ECO:0000269|PubMed:10747907}; Cytoplasmic side {ECO:0000269|PubMed:10747907}. Cytoplasm, cytoskeleton {ECO:0000269|PubMed:10747907}. Cell projection, axon {ECO:0000269|PubMed:10747907}. Cell projection, dendrite {ECO:…	expression	0	1	CM/C	N	1	IPA	11517268	In hippocampal neurons from 18.0 day-old embryonic rat, rat Agrin [Agrn] protein increases expression of rat Tau [Mapt] protein and increases localization of rat Tau [Mapt] protein to cytoskeleton fraction from hippocampal neurons.	1	0	[Isoform 1]: heparan sulfate basal lamina glycoprotein that plays a central role in the formation and the maintenance of the neuromuscular junction (NMJ) and directs key events in postsynaptic differentiation. Component of the AGRN-LRP4 receptor complex that induces the phosphorylation and activation of MUSK. The activation of MUSK in myotubes induces the formation of NMJ by regulating different …	NA	1		Basal respiratory cells: 94.5;Collecting duct cells: 156.3;Ductal cells: 91.2;Pancreatic endocrine cells: 87.3				Promotes microtubule assembly and stability, and might be involved in the establishment and maintenance of neuronal polarity (PubMed:21985311). The C-terminus binds axonal microtubules while the N-terminus binds neural plasma membrane components, suggesting that tau functions as a linker protein between both (PubMed:21985311, PubMed:32961270). Axonal polarity is predetermined by TAU/MAPT localiza…	NA	1	brain: 68.5;skeletal muscle: 79.7	Astrocytes: 142.4;Bipolar cells: 314.4;Early spermatids: 199.9;Excitatory neurons: 189.2;Horizontal cells: 361.7;Inhibitory neurons: 153.7;Late spermatids: 416.6;Muller glia cells: 145.7;Oligodendrocytes: 163.8
AGRN	POFUT1	[Isoform 1]: Secreted, extracellular space, extracellular matrix {ECO:0000269|PubMed:20551380}. Note=Synaptic basal lamina at the neuromuscular junction. {ECO:0000250|UniProtKB:P31696}.; [Isoform 2]: Cell junction, synapse {ECO:0000250|UniProtKB:A2ASQ1}. Cell membrane {ECO:0000250|UniProtKB:A2ASQ1}; Single-pass type II membrane protein {ECO:0000250|UniProtKB:A2ASQ1}.	Endoplasmic reticulum {ECO:0000250|UniProtKB:Q6EV70}.	modification		1	CM/C	N	1	Uniprot	18775496	Agrin is O-fucosylated in a Pofut1-dependent manner and this glycosylation can regulate agrin function. Protein O-fucosyltransferase 1 (Pofut1) transfers fucose to serine or threonine on proteins, including Notch receptors, that contain EGF repeats with a particular consensus sequence. Here we demonstrate that agrin is O-fucosylated in a Pofut1-dependent manner, and that this glycosylation can re…	1	1	[Isoform 1]: heparan sulfate basal lamina glycoprotein that plays a central role in the formation and the maintenance of the neuromuscular junction (NMJ) and directs key events in postsynaptic differentiation. Component of the AGRN-LRP4 receptor complex that induces the phosphorylation and activation of MUSK. The activation of MUSK in myotubes induces the formation of NMJ by regulating different …	NA	1		Basal respiratory cells: 94.5;Collecting duct cells: 156.3;Ductal cells: 91.2;Pancreatic endocrine cells: 87.3				Catalyzes the reaction that attaches fucose through an O-glycosidic linkage to a conserved serine or threonine residue found in the consensus sequence C2-X(4,5)-[S/T]-C3 of EGF domains, where C2 and C3 are the second and third conserved cysteines. Specifically uses GDP-fucose as donor substrate and proper disulfide pairing of the substrate EGF domains is required for fucose transfer. Plays a cruc…	NA	1		Hepatocytes: 39.8
AGRN	PRKAR2A	[Isoform 1]: Secreted, extracellular space, extracellular matrix {ECO:0000269|PubMed:20551380}. Note=Synaptic basal lamina at the neuromuscular junction. {ECO:0000250|UniProtKB:P31696}.; [Isoform 2]: Cell junction, synapse {ECO:0000250|UniProtKB:A2ASQ1}. Cell membrane {ECO:0000250|UniProtKB:A2ASQ1}; Single-pass type II membrane protein {ECO:0000250|UniProtKB:A2ASQ1}.	Cytoplasm {ECO:0000269|PubMed:21423175}. Cell membrane {ECO:0000269|PubMed:21423175}. Note=Colocalizes with PJA2 in the cytoplasm and the cell membrane.	protein-protein interactions	1	1	CM/C	N	1	IPA	29872149	Binding of human AGRN protein and human PRKAR2A protein occurs.	1	1	[Isoform 1]: heparan sulfate basal lamina glycoprotein that plays a central role in the formation and the maintenance of the neuromuscular junction (NMJ) and directs key events in postsynaptic differentiation. Component of the AGRN-LRP4 receptor complex that induces the phosphorylation and activation of MUSK. The activation of MUSK in myotubes induces the formation of NMJ by regulating different …	NA	1		Basal respiratory cells: 94.5;Collecting duct cells: 156.3;Ductal cells: 91.2;Pancreatic endocrine cells: 87.3				Regulatory subunit of the cAMP-dependent protein kinases involved in cAMP signaling in cells. Type II regulatory chains mediate membrane association by binding to anchoring proteins, including the MAP2 kinase.	NA	1	skeletal muscle: 83.5;testis: 83.1	Early spermatids: 788.7;Late spermatids: 1370.7
AGRN	RANBP1	[Isoform 1]: Secreted, extracellular space, extracellular matrix {ECO:0000269|PubMed:20551380}. Note=Synaptic basal lamina at the neuromuscular junction. {ECO:0000250|UniProtKB:P31696}.; [Isoform 2]: Cell junction, synapse {ECO:0000250|UniProtKB:A2ASQ1}. Cell membrane {ECO:0000250|UniProtKB:A2ASQ1}; Single-pass type II membrane protein {ECO:0000250|UniProtKB:A2ASQ1}.	NA; Cytoskeleton, centrosome, Cytosol, Nucleus, nuclear envelope, nuclear pore, cytoplasm	protein-protein interactions	1	1	CM/C	N	1	IPA	29872149	Binding of human AGRN protein and human RANBP1 protein occurs.	1	0	[Isoform 1]: heparan sulfate basal lamina glycoprotein that plays a central role in the formation and the maintenance of the neuromuscular junction (NMJ) and directs key events in postsynaptic differentiation. Component of the AGRN-LRP4 receptor complex that induces the phosphorylation and activation of MUSK. The activation of MUSK in myotubes induces the formation of NMJ by regulating different …	NA	1		Basal respiratory cells: 94.5;Collecting duct cells: 156.3;Ductal cells: 91.2;Pancreatic endocrine cells: 87.3				Plays a role in RAN-dependent nucleocytoplasmic transport. Alleviates the TNPO1-dependent inhibition of RAN GTPase activity and mediates the dissociation of RAN from proteins involved in transport into the nucleus (By similarity). Induces a conformation change in the complex formed by XPO1 and RAN that triggers the release of the nuclear export signal of cargo proteins (PubMed:20485264). Promotes…	NA	1		Extravillous trophoblasts: 754.9
AGRN	SRSF4	[Isoform 1]: Secreted, extracellular space, extracellular matrix {ECO:0000269|PubMed:20551380}. Note=Synaptic basal lamina at the neuromuscular junction. {ECO:0000250|UniProtKB:P31696}.; [Isoform 2]: Cell junction, synapse {ECO:0000250|UniProtKB:A2ASQ1}. Cell membrane {ECO:0000250|UniProtKB:A2ASQ1}; Single-pass type II membrane protein {ECO:0000250|UniProtKB:A2ASQ1}.	Nucleus speckle {ECO:0000269|PubMed:14578391}.	phosphorylation		1	0	0	0	IPA	24899341	Soluble chicken Soluble neural agrin (isoform A4B8) [product of AGRN] protein(s) increases phosphorylation of mouse Srsf4 protein in C2 myotube cell line. Experiment Type: phosphoproteomics	1	1	[Isoform 1]: heparan sulfate basal lamina glycoprotein that plays a central role in the formation and the maintenance of the neuromuscular junction (NMJ) and directs key events in postsynaptic differentiation. Component of the AGRN-LRP4 receptor complex that induces the phosphorylation and activation of MUSK. The activation of MUSK in myotubes induces the formation of NMJ by regulating different …	NA	1		Basal respiratory cells: 94.5;Collecting duct cells: 156.3;Ductal cells: 91.2;Pancreatic endocrine cells: 87.3				Plays a role in alternative splice site selection during pre-mRNA splicing. Represses the splicing of MAPT/Tau exon 10. {ECO:0000269|PubMed:15009664}.	NA	1
AGRN	SUGP1	[Isoform 1]: Secreted, extracellular space, extracellular matrix {ECO:0000269|PubMed:20551380}. Note=Synaptic basal lamina at the neuromuscular junction. {ECO:0000250|UniProtKB:P31696}.; [Isoform 2]: Cell junction, synapse {ECO:0000250|UniProtKB:A2ASQ1}. Cell membrane {ECO:0000250|UniProtKB:A2ASQ1}; Single-pass type II membrane protein {ECO:0000250|UniProtKB:A2ASQ1}.	Nucleus {ECO:0000305}.	protein-protein interactions	1	0	0	0	0	IPA	0	0	1	0	[Isoform 1]: heparan sulfate basal lamina glycoprotein that plays a central role in the formation and the maintenance of the neuromuscular junction (NMJ) and directs key events in postsynaptic differentiation. Component of the AGRN-LRP4 receptor complex that induces the phosphorylation and activation of MUSK. The activation of MUSK in myotubes induces the formation of NMJ by regulating different …	NA	1		Basal respiratory cells: 94.5;Collecting duct cells: 156.3;Ductal cells: 91.2;Pancreatic endocrine cells: 87.3				Plays a role in pre-mRNA splicing.	NA	1		Late spermatids: 115.2
AGRN	THBS1	[Isoform 1]: Secreted, extracellular space, extracellular matrix {ECO:0000269|PubMed:20551380}. Note=Synaptic basal lamina at the neuromuscular junction. {ECO:0000250|UniProtKB:P31696}.; [Isoform 2]: Cell junction, synapse {ECO:0000250|UniProtKB:A2ASQ1}. Cell membrane {ECO:0000250|UniProtKB:A2ASQ1}; Single-pass type II membrane protein {ECO:0000250|UniProtKB:A2ASQ1}.	Secreted {ECO:0000269|PubMed:6777381}. Cell surface {ECO:0000269|PubMed:6777381}. Secreted, extracellular space, extracellular matrix {ECO:0000269|PubMed:6341993}. Endoplasmic reticulum {ECO:0000250|UniProtKB:P35441}. Sarcoplasmic reticulum {ECO:0000250|UniProtKB:P35441}. Note=Secreted by thrombin-activated platelets and binds to the cell surface in the presence of extracellular Ca(2+) (PubMed:67…	protein-protein interactions		1	CM/S	N	1	IPA	10328953	Binding of agrin [AGRN] and thrombospondin occurs. (Original Sentence: Our data show that agrin binds FGF-2 and thrombospondin by a heparan sulfate-dependent mechanism, merosin and laminin by both heparan sulfate-dependent and -independent mechanisms, and tenascin solely via agrin's protein core.)	1	1	[Isoform 1]: heparan sulfate basal lamina glycoprotein that plays a central role in the formation and the maintenance of the neuromuscular junction (NMJ) and directs key events in postsynaptic differentiation. Component of the AGRN-LRP4 receptor complex that induces the phosphorylation and activation of MUSK. The activation of MUSK in myotubes induces the formation of NMJ by regulating different …	NA	1		Basal respiratory cells: 94.5;Collecting duct cells: 156.3;Ductal cells: 91.2;Pancreatic endocrine cells: 87.3				Adhesive glycoprotein that mediates cell-to-cell and cell-to-matrix interactions. Binds heparin. May play a role in dentinogenesis and/or maintenance of dentin and dental pulp (By similarity). Ligand for CD36 mediating antiangiogenic properties. Plays a role in ER stress response, via its interaction with the activating transcription factor 6 alpha (ATF6) which produces adaptive ER stress respons…	NA	1		Fibroblasts: 279.5;Granulosa cells: 228.3;Macrophages: 598.0;Smooth muscle cells: 283.8	hypothalamus: 116.6		spinal cord: 20.6
AGRN	TNIK	[Isoform 1]: Secreted, extracellular space, extracellular matrix {ECO:0000269|PubMed:20551380}. Note=Synaptic basal lamina at the neuromuscular junction. {ECO:0000250|UniProtKB:P31696}.; [Isoform 2]: Cell junction, synapse {ECO:0000250|UniProtKB:A2ASQ1}. Cell membrane {ECO:0000250|UniProtKB:A2ASQ1}; Single-pass type II membrane protein {ECO:0000250|UniProtKB:A2ASQ1}.	Nucleus. Cytoplasm. Recycling endosome. Cytoplasm, cytoskeleton. Note=Associated with recycling endosomes and the cytoskeletal fraction upon RAP2A overexpression.	protein-protein interactions	1	1	CM/C	N	1	IPA	28671696	Binding of mouse Agrn protein and mouse Tnik protein occurs.	1	0	[Isoform 1]: heparan sulfate basal lamina glycoprotein that plays a central role in the formation and the maintenance of the neuromuscular junction (NMJ) and directs key events in postsynaptic differentiation. Component of the AGRN-LRP4 receptor complex that induces the phosphorylation and activation of MUSK. The activation of MUSK in myotubes induces the formation of NMJ by regulating different …	NA	1		Basal respiratory cells: 94.5;Collecting duct cells: 156.3;Ductal cells: 91.2;Pancreatic endocrine cells: 87.3				Serine/threonine kinase that acts as an essential activator of the Wnt signaling pathway. Recruited to promoters of Wnt target genes and required to activate their expression. May act by phosphorylating TCF4/TCF7L2. Appears to act upstream of the JUN N-terminal pathway. May play a role in the response to environmental stress. Part of a signaling complex composed of NEDD4, RAP2A and TNIK which reg…	NA	1	brain: 36.1	Astrocytes: 1074.4;Excitatory neurons: 248.4;Inhibitory neurons: 360.8;Oligodendrocyte precursor cells: 374.5;Oligodendrocytes: 205.5
AGRN	TNN	[Isoform 1]: Secreted, extracellular space, extracellular matrix {ECO:0000269|PubMed:20551380}. Note=Synaptic basal lamina at the neuromuscular junction. {ECO:0000250|UniProtKB:P31696}.; [Isoform 2]: Cell junction, synapse {ECO:0000250|UniProtKB:A2ASQ1}. Cell membrane {ECO:0000250|UniProtKB:A2ASQ1}; Single-pass type II membrane protein {ECO:0000250|UniProtKB:A2ASQ1}.	Secreted, extracellular space, extracellular matrix {ECO:0000269|PubMed:19884327}.	protein-protein interactions	1	1	CM/S	N	1	IPA	29872149	Binding of human AGRN protein and human TNN protein occurs	1	1	[Isoform 1]: heparan sulfate basal lamina glycoprotein that plays a central role in the formation and the maintenance of the neuromuscular junction (NMJ) and directs key events in postsynaptic differentiation. Component of the AGRN-LRP4 receptor complex that induces the phosphorylation and activation of MUSK. The activation of MUSK in myotubes induces the formation of NMJ by regulating different …	NA	1		Basal respiratory cells: 94.5;Collecting duct cells: 156.3;Ductal cells: 91.2;Pancreatic endocrine cells: 87.3				Extracellular matrix protein that seems to be a ligand for ITGA8:ITGB1, ITGAV:ITGB1 and ITGA4:ITGB1 (By similarity) (PubMed:17909022). Involved in neurite outgrowth and cell migration in hippocampal explants (By similarity). During endochondral bone formation, inhibits proliferation and differentiation of proteoblasts mediated by canonical WNT signaling (By similarity). In tumors, stimulates angi…	NA	1	adipose tissue: 12.1;breast: 4.9	Adipocytes: 6.1;Fibroblasts: 7.5;Hepatic stellate cells: 2.5;Langerhans cells: 2.5;Smooth muscle cells: 10.4
AGRN	TTN	[Isoform 1]: Secreted, extracellular space, extracellular matrix {ECO:0000269|PubMed:20551380}. Note=Synaptic basal lamina at the neuromuscular junction. {ECO:0000250|UniProtKB:P31696}.; [Isoform 2]: Cell junction, synapse {ECO:0000250|UniProtKB:A2ASQ1}. Cell membrane {ECO:0000250|UniProtKB:A2ASQ1}; Single-pass type II membrane protein {ECO:0000250|UniProtKB:A2ASQ1}.	Cytoplasm {ECO:0000305|PubMed:16410549}. Nucleus {ECO:0000269|PubMed:16410549}.	protein-protein interactions	1	1	CM/C	N	0	IPA	29872149	Binding of human AGRN protein and human TTN protein occurs. Experiment Type: affinity chromatography	1	0	[Isoform 1]: heparan sulfate basal lamina glycoprotein that plays a central role in the formation and the maintenance of the neuromuscular junction (NMJ) and directs key events in postsynaptic differentiation. Component of the AGRN-LRP4 receptor complex that induces the phosphorylation and activation of MUSK. The activation of MUSK in myotubes induces the formation of NMJ by regulating different …	NA	1		Basal respiratory cells: 94.5;Collecting duct cells: 156.3;Ductal cells: 91.2;Pancreatic endocrine cells: 87.3				Key component in the assembly and functioning of vertebrate striated muscles. By providing connections at the level of individual microfilaments, it contributes to the fine balance of forces between the two halves of the sarcomere. The size and extensibility of the cross-links are the main determinants of sarcomere extensibility properties of muscle. In non-muscle cells, seems to play a role in c…	Mg(2+); Xref=ChEBI:CHEBI:18420;	1	skeletal muscle: 929.2;tongue: 372.8	Cardiomyocytes: 24394.9
AGRN	TUBA1B	[Isoform 1]: Secreted, extracellular space, extracellular matrix {ECO:0000269|PubMed:20551380}. Note=Synaptic basal lamina at the neuromuscular junction. {ECO:0000250|UniProtKB:P31696}.; [Isoform 2]: Cell junction, synapse {ECO:0000250|UniProtKB:A2ASQ1}. Cell membrane {ECO:0000250|UniProtKB:A2ASQ1}; Single-pass type II membrane protein {ECO:0000250|UniProtKB:A2ASQ1}.	Cytoplasm, cytoskeleton.	protein-protein interactions	1	1	CM/CS	N	1	IPA	29872149	Binding of human AGRN protein and human TUBA1B protein occurs. Experiment Type: affinity chromatography	1	1	[Isoform 1]: heparan sulfate basal lamina glycoprotein that plays a central role in the formation and the maintenance of the neuromuscular junction (NMJ) and directs key events in postsynaptic differentiation. Component of the AGRN-LRP4 receptor complex that induces the phosphorylation and activation of MUSK. The activation of MUSK in myotubes induces the formation of NMJ by regulating different …	NA	1		Basal respiratory cells: 94.5;Collecting duct cells: 156.3;Ductal cells: 91.2;Pancreatic endocrine cells: 87.3				Tubulin is the major constituent of microtubules. It binds two moles of GTP, one at an exchangeable site on the beta chain and one at a non-exchangeable site on the alpha chain.	NA	1		Erythroid cells: 2143.3;Extravillous trophoblasts: 2555.5;Hofbauer cells: 2114.8
AHCY	CDX2	Cytoplasm {ECO:0000269|PubMed:17081065}. Melanosome {ECO:0000269|PubMed:17081065}. Note=Identified by mass spectrometry in melanosome fractions from stage I to stage IV.	Nucleus {ECO:0000250|UniProtKB:P43241}.	expression	0	1	0	0	0	IPA	32193337	Mutation of AHCY protein to mutant AHCY protein (substitution p.T136A) increases upregulation of mouse Cdx2 mRNA in E14.1 cells. Experiment Type: RNA sequence analysis	1	0	Adenosylhomocysteine is a competitive inhibitor of S-adenosyl-L-methionine-dependent methyl transferase reactions; therefore adenosylhomocysteinase may play a key role in the control of methylations via regulation of the intracellular concentration of adenosylhomocysteine. {ECO:0000269|PubMed:12590576}.	NAD(+); Xref=ChEBI:CHEBI:57540; Evidence={ECO:0000269|PubMed:12590576, ECO:0000269|PubMed:9586999}; Note=Binds 1 NAD(+) per subunit. {ECO:0000269|PubMed:12590576, ECO:0000269|PubMed:9586999};	1		Proximal tubular cells: 275.0				Transcription factor which regulates the transcription of multiple genes expressed in the intestinal epithelium (By similarity). Binds to the promoter of the intestinal sucrase-isomaltase SI and activates SI transcription (By similarity). Binds to the DNA sequence 5'-ATAAAAACTTAT-3' in the promoter region of VDR and activates VDR transcription (By similarity). Binds to and activates transcription…	NA	NA	intestine: 41.4	Distal enterocytes: 287.5;Intestinal goblet cells: 214.5;Paneth cells: 181.7;Proximal enterocytes: 226.9;Undifferentiated cells: 194.4
AHCY	COMT	Cytoplasm {ECO:0000269|PubMed:17081065}. Melanosome {ECO:0000269|PubMed:17081065}. Note=Identified by mass spectrometry in melanosome fractions from stage I to stage IV.	[Isoform Soluble]: Cytoplasm {ECO:0000269|PubMed:11559542}.; [Isoform Membrane-bound]: Cell membrane {ECO:0000269|PubMed:21846718}; Single-pass type II membrane protein {ECO:0000269|PubMed:21846718}; Extracellular side {ECO:0000269|PubMed:21846718}.	protein-protein interactions	1	1	C/CM	N	0	IPA	25172130	Interaction of SAHH [AHCY] and COMT occurs.	1	0	Adenosylhomocysteine is a competitive inhibitor of S-adenosyl-L-methionine-dependent methyl transferase reactions; therefore adenosylhomocysteinase may play a key role in the control of methylations via regulation of the intracellular concentration of adenosylhomocysteine. {ECO:0000269|PubMed:12590576}.	NAD(+); Xref=ChEBI:CHEBI:57540; Evidence={ECO:0000269|PubMed:12590576, ECO:0000269|PubMed:9586999}; Note=Binds 1 NAD(+) per subunit. {ECO:0000269|PubMed:12590576, ECO:0000269|PubMed:9586999};	1		Proximal tubular cells: 275.0				Catalyzes the O-methylation, and thereby the inactivation, of catecholamine neurotransmitters and catechol hormones. Also shortens the biological half-lives of certain neuroactive drugs, like L-DOPA, alpha-methyl DOPA and isoproterenol. {ECO:0000269|PubMed:11559542, ECO:0000269|PubMed:21846718}.	Mg(2+); Xref=ChEBI:CHEBI:18420; Evidence={ECO:0000250|UniProtKB:P22734}; Note=Binds 1 Mg(2+) ion per subunit. {ECO:0000250|UniProtKB:P22734};	1		Cytotrophoblasts: 885.9;Syncytiotrophoblasts: 648.5
AHCY	EP300	Cytoplasm {ECO:0000269|PubMed:17081065}. Melanosome {ECO:0000269|PubMed:17081065}. Note=Identified by mass spectrometry in melanosome fractions from stage I to stage IV.	Cytoplasm {ECO:0000269|PubMed:12929931, ECO:0000269|PubMed:20940255}. Nucleus {ECO:0000269|PubMed:12929931, ECO:0000269|PubMed:14645221, ECO:0000269|PubMed:16219772, ECO:0000269|PubMed:16574662, ECO:0000269|PubMed:17761950, ECO:0000269|PubMed:20940255}. Chromosome {ECO:0000269|PubMed:14645221, ECO:0000269|PubMed:25818647}. Note=Localizes to active chromatin: Colocalizes with histone H3 acetylated…	protein-protein interactions	1	1	C	N	1	IPA	30110629	Binding of human AHCY protein and human EP300 protein occurs. Experiment Type: affinity chromatography	1	1	Adenosylhomocysteine is a competitive inhibitor of S-adenosyl-L-methionine-dependent methyl transferase reactions; therefore adenosylhomocysteinase may play a key role in the control of methylations via regulation of the intracellular concentration of adenosylhomocysteine. {ECO:0000269|PubMed:12590576}.	NAD(+); Xref=ChEBI:CHEBI:57540; Evidence={ECO:0000269|PubMed:12590576, ECO:0000269|PubMed:9586999}; Note=Binds 1 NAD(+) per subunit. {ECO:0000269|PubMed:12590576, ECO:0000269|PubMed:9586999};	1		Proximal tubular cells: 275.0				Functions as histone acetyltransferase and regulates transcription via chromatin remodeling (PubMed:23415232, PubMed:23934153, PubMed:8945521). Acetylates all four core histones in nucleosomes. Histone acetylation gives an epigenetic tag for transcriptional activation (PubMed:23415232, PubMed:23934153, PubMed:8945521). Mediates cAMP-gene regulation by binding specifically to phosphorylated CREB p…	NA	1
AHCY	FN1	Cytoplasm {ECO:0000269|PubMed:17081065}. Melanosome {ECO:0000269|PubMed:17081065}. Note=Identified by mass spectrometry in melanosome fractions from stage I to stage IV.	Secreted, extracellular space, extracellular matrix {ECO:0000305|PubMed:29100092}.	expression	1	1	S/C	N	1	IPA	24174428	Fn [FN1] protein decreases expression of human AHCY mRNA in cultured HUVEC cells. Experiment Type: microarray analysis	1	1	Adenosylhomocysteine is a competitive inhibitor of S-adenosyl-L-methionine-dependent methyl transferase reactions; therefore adenosylhomocysteinase may play a key role in the control of methylations via regulation of the intracellular concentration of adenosylhomocysteine. {ECO:0000269|PubMed:12590576}.	NAD(+); Xref=ChEBI:CHEBI:57540; Evidence={ECO:0000269|PubMed:12590576, ECO:0000269|PubMed:9586999}; Note=Binds 1 NAD(+) per subunit. {ECO:0000269|PubMed:12590576, ECO:0000269|PubMed:9586999};	1		Proximal tubular cells: 275.0				Fibronectins bind cell surfaces and various compounds including collagen, fibrin, heparin, DNA, and actin (PubMed:3024962, PubMed:3900070, PubMed:3593230, PubMed:7989369). Fibronectins are involved in cell adhesion, cell motility, opsonization, wound healing, and maintenance of cell shape (PubMed:3024962, PubMed:3900070, PubMed:3593230, PubMed:7989369). Involved in osteoblast compaction through t…	NA	1	liver: 1740.1;placenta: 2952.1	Extravillous trophoblasts: 2583.6;Fibroblasts: 562.6;Hepatocytes: 1012.4;Smooth muscle cells: 450.2
AIFM3	LZTR1	Mitochondrion {ECO:0000269|PubMed:15764604}. Note=Does not translocate to the nucleus upon induction of apoptosis.	Endomembrane system {ECO:0000269|PubMed:30442762, ECO:0000269|PubMed:30442766}. Recycling endosome {ECO:0000269|PubMed:30442762}. Golgi apparatus {ECO:0000269|PubMed:16356934, ECO:0000269|PubMed:30481304}.	protein-protein interactions	1	0	0	0	0	IPA	0	0	1	0	Induces apoptosis through a caspase dependent pathway. Reduces mitochondrial membrane potential. {ECO:0000269|PubMed:15764604}.	NA	1	brain: 57.6;choroid plexus: 109.0	Astrocytes: 92.1;Distal enterocytes: 76.5;Intestinal goblet cells: 31.3;Muller glia cells: 25.3;Paneth cells: 27.5;Undifferentiated cells: 37.9				Substrate-specific adapter of a BCR (BTB-CUL3-RBX1) E3 ubiquitin-protein ligase complex that mediates ubiquitination of Ras (K-Ras/KRAS, N-Ras/NRAS and H-Ras/HRAS) (PubMed:30442762, PubMed:30442766, PubMed:30481304). Is a negative regulator of RAS-MAPK signaling that acts by controlling Ras levels and decreasing Ras association with membranes (PubMed:30442762, PubMed:30442766, PubMed:30481304). {…	NA	1
AKAP9	ABI2	Golgi apparatus {ECO:0000269|PubMed:15047863, ECO:0000269|PubMed:19242490, ECO:0000269|PubMed:25217626, ECO:0000269|PubMed:27666745}. Cytoplasm {ECO:0000269|PubMed:9915845}. Cytoplasm, cytoskeleton, microtubule organizing center, centrosome {ECO:0000269|PubMed:12270714, ECO:0000269|PubMed:14654843, ECO:0000269|PubMed:25657325, ECO:0000269|PubMed:29162697, ECO:0000269|PubMed:9915845}. Note=Cytopla…	Cytoplasm {ECO:0000269|PubMed:11516653, ECO:0000269|PubMed:7590236, ECO:0000269|PubMed:8649853}. Nucleus {ECO:0000269|PubMed:7590236}.; [Isoform 1]: Cell projection, lamellipodium {ECO:0000269|PubMed:11516653, ECO:0000269|PubMed:15572692}. Cell projection, filopodium {ECO:0000269|PubMed:11516653}. Cytoplasm, cytoskeleton {ECO:0000269|PubMed:15572692}. Cell junction, adherens junction {ECO:0000269…	protein-protein interactions	0	1	0	0	0	IPA	0	0	1	0	Scaffolding protein that assembles several protein kinases and phosphatases on the centrosome and Golgi apparatus. Required to maintain the integrity of the Golgi apparatus (PubMed:10202149, PubMed:15047863). Required for microtubule nucleation at the cis-side of the Golgi apparatus (PubMed:15047863, PubMed:19242490). Required for association of the centrosomes with the poles of the bipolar mitot…	NA	1		Cone photoreceptor cells: 2230.9;Rod photoreceptor cells: 1279.6				Regulator of actin cytoskeleton dynamics underlying cell motility and adhesion. Functions as a component of the WAVE complex, which activates actin nucleating machinery Arp2/3 to drive lamellipodia formation (PubMed:21107423). Acts as regulator and substrate of nonreceptor tyrosine kinases ABL1 and ABL2 involved in processes linked to cell growth and differentiation. Positively regulates ABL1-med…	NA	1
AKAP9	ADCY2	Golgi apparatus {ECO:0000269|PubMed:15047863, ECO:0000269|PubMed:19242490, ECO:0000269|PubMed:25217626, ECO:0000269|PubMed:27666745}. Cytoplasm {ECO:0000269|PubMed:9915845}. Cytoplasm, cytoskeleton, microtubule organizing center, centrosome {ECO:0000269|PubMed:12270714, ECO:0000269|PubMed:14654843, ECO:0000269|PubMed:25657325, ECO:0000269|PubMed:29162697, ECO:0000269|PubMed:9915845}. Note=Cytopla…	Membrane {ECO:0000269|PubMed:15385642}; Multi-pass membrane protein {ECO:0000305}. Cell membrane {ECO:0000269|PubMed:11549699, ECO:0000269|PubMed:21228062}; Multi-pass membrane protein {ECO:0000305}. Cytoplasm {ECO:0000269|PubMed:11549699}.	protein-protein interactions	0	1	C	N	1	IPA	18772391	Binding of rat Adcy2 protein and human AKAP9 protein occurs. Experiment Type: pulldown assay	1	0	Scaffolding protein that assembles several protein kinases and phosphatases on the centrosome and Golgi apparatus. Required to maintain the integrity of the Golgi apparatus (PubMed:10202149, PubMed:15047863). Required for microtubule nucleation at the cis-side of the Golgi apparatus (PubMed:15047863, PubMed:19242490). Required for association of the centrosomes with the poles of the bipolar mitot…	NA	1		Cone photoreceptor cells: 2230.9;Rod photoreceptor cells: 1279.6				Catalyzes the formation of the signaling molecule cAMP in response to G-protein signaling (PubMed:15385642). Down-stream signaling cascades mediate changes in gene expression patterns and lead to increased IL6 production. Functions in signaling cascades downstream of the muscarinic acetylcholine receptors (By similarity). {ECO:0000250|UniProtKB:P26769, ECO:0000269|PubMed:15385642}.	Mg(2+); Xref=ChEBI:CHEBI:18420; Evidence={ECO:0000269|PubMed:15385642}; Name=Mn(2+); Xref=ChEBI:CHEBI:29035; Evidence={ECO:0000269|PubMed:15385642}; Note=Binds 2 magnesium ions per subunit. Is also active with manganese (in vitro). {ECO:0000250|UniProtKB:P26769};	1	brain: 45.9;skeletal muscle: 68.9;tongue: 31.0	Astrocytes: 647.1;Excitatory neurons: 406.6;Horizontal cells: 201.9;Inhibitory neurons: 423.9;Oligodendrocyte precursor cells: 181.5
AKAP9	BIRC6	Golgi apparatus {ECO:0000269|PubMed:15047863, ECO:0000269|PubMed:19242490, ECO:0000269|PubMed:25217626, ECO:0000269|PubMed:27666745}. Cytoplasm {ECO:0000269|PubMed:9915845}. Cytoplasm, cytoskeleton, microtubule organizing center, centrosome {ECO:0000269|PubMed:12270714, ECO:0000269|PubMed:14654843, ECO:0000269|PubMed:25657325, ECO:0000269|PubMed:29162697, ECO:0000269|PubMed:9915845}. Note=Cytopla…	Golgi apparatus, trans-Golgi network membrane {ECO:0000269|PubMed:18329369}. Endosome {ECO:0000269|PubMed:18329369}. Cytoplasm, cytoskeleton, spindle pole {ECO:0000269|PubMed:18329369}. Cytoplasm, cytoskeleton, microtubule organizing center, centrosome {ECO:0000269|PubMed:18329369}. Midbody, Midbody ring {ECO:0000269|PubMed:18329369}. Note=Exhibits cell cycle-dependent localization. Concentrates …	protein-protein interactions	1	1	C	N	1	IPA	28514442	Binding of human AKAP9 protein and human BIRC6 protein occurs.	1	1	Scaffolding protein that assembles several protein kinases and phosphatases on the centrosome and Golgi apparatus. Required to maintain the integrity of the Golgi apparatus (PubMed:10202149, PubMed:15047863). Required for microtubule nucleation at the cis-side of the Golgi apparatus (PubMed:15047863, PubMed:19242490). Required for association of the centrosomes with the poles of the bipolar mitot…	NA	1		Cone photoreceptor cells: 2230.9;Rod photoreceptor cells: 1279.6				Anti-apoptotic protein which can regulate cell death by controlling caspases and by acting as an E3 ubiquitin-protein ligase. Has an unusual ubiquitin conjugation system in that it could combine in a single polypeptide, ubiquitin conjugating (E2) with ubiquitin ligase (E3) activity, forming a chimeric E2/E3 ubiquitin ligase. Its tragets include CASP9 and DIABLO/SMAC. Acts as an inhibitor of CASP3…	NA	1		Excitatory neurons: 272.0;Inhibitory neurons: 291.3;Oligodendrocytes: 361.3
AKAP9	CTNNA3	Golgi apparatus {ECO:0000269|PubMed:15047863, ECO:0000269|PubMed:19242490, ECO:0000269|PubMed:25217626, ECO:0000269|PubMed:27666745}. Cytoplasm {ECO:0000269|PubMed:9915845}. Cytoplasm, cytoskeleton, microtubule organizing center, centrosome {ECO:0000269|PubMed:12270714, ECO:0000269|PubMed:14654843, ECO:0000269|PubMed:25657325, ECO:0000269|PubMed:29162697, ECO:0000269|PubMed:9915845}. Note=Cytopla…	Cytoplasm, cytoskeleton {ECO:0000305}. Note=Localizes to intercalated disks of cardiomyocytes and in peritubular myoid cells of testis, and colocalizes with CTNNA1 and CTNNA2. {ECO:0000269|PubMed:11590244}.	protein-protein interactions	1	1	0	0	0	IPA	0	0	1	0	Scaffolding protein that assembles several protein kinases and phosphatases on the centrosome and Golgi apparatus. Required to maintain the integrity of the Golgi apparatus (PubMed:10202149, PubMed:15047863). Required for microtubule nucleation at the cis-side of the Golgi apparatus (PubMed:15047863, PubMed:19242490). Required for association of the centrosomes with the poles of the bipolar mitot…	NA	1		Cone photoreceptor cells: 2230.9;Rod photoreceptor cells: 1279.6				May be involved in formation of stretch-resistant cell-cell adhesion complexes. {ECO:0000303|PubMed:11590244}.	NA	1	brain: 172.3	Oligodendrocytes: 4054.6
AKAP9	PCM1	Golgi apparatus {ECO:0000269|PubMed:15047863, ECO:0000269|PubMed:19242490, ECO:0000269|PubMed:25217626, ECO:0000269|PubMed:27666745}. Cytoplasm {ECO:0000269|PubMed:9915845}. Cytoplasm, cytoskeleton, microtubule organizing center, centrosome {ECO:0000269|PubMed:12270714, ECO:0000269|PubMed:14654843, ECO:0000269|PubMed:25657325, ECO:0000269|PubMed:29162697, ECO:0000269|PubMed:9915845}. Note=Cytopla…	Cytoplasm, cytoskeleton {ECO:0000250|UniProtKB:Q8AV28}. Cytoplasm, cytoskeleton, microtubule organizing center, centrosome {ECO:0000269|PubMed:14654843, ECO:0000269|PubMed:20719959, ECO:0000269|PubMed:30804208}. Cytoplasmic granule {ECO:0000269|PubMed:15107855}. Cytoplasm, cytoskeleton, microtubule organizing center, centrosome, centriolar satellite {ECO:0000269|PubMed:15107855, ECO:0000269|PubMe…	protein-protein interactions	1	1	C	N	1	IPA	30217970	Binding of human AKAP9 protein and human PCM1 protein occurs. Experiment Type: two-hybrid assay	1	1	Scaffolding protein that assembles several protein kinases and phosphatases on the centrosome and Golgi apparatus. Required to maintain the integrity of the Golgi apparatus (PubMed:10202149, PubMed:15047863). Required for microtubule nucleation at the cis-side of the Golgi apparatus (PubMed:15047863, PubMed:19242490). Required for association of the centrosomes with the poles of the bipolar mitot…	NA	1		Cone photoreceptor cells: 2230.9;Rod photoreceptor cells: 1279.6				Required for centrosome assembly and function (PubMed:12403812, PubMed:15659651, PubMed:16943179). Essential for the correct localization of several centrosomal proteins including CEP250, CETN3, PCNT and NEK2 (PubMed:12403812, PubMed:15659651). Required to anchor microtubules to the centrosome (PubMed:12403812, PubMed:15659651). Involved in the biogenesis of cilia (PubMed:20551181, PubMed:2412131…	NA	1		Early spermatids: 528.5;Spermatocytes: 569.3
AKAP9	PRKAR2A	Golgi apparatus {ECO:0000269|PubMed:15047863, ECO:0000269|PubMed:19242490, ECO:0000269|PubMed:25217626, ECO:0000269|PubMed:27666745}. Cytoplasm {ECO:0000269|PubMed:9915845}. Cytoplasm, cytoskeleton, microtubule organizing center, centrosome {ECO:0000269|PubMed:12270714, ECO:0000269|PubMed:14654843, ECO:0000269|PubMed:25657325, ECO:0000269|PubMed:29162697, ECO:0000269|PubMed:9915845}. Note=Cytopla…	Cytoplasm {ECO:0000269|PubMed:21423175}. Cell membrane {ECO:0000269|PubMed:21423175}. Note=Colocalizes with PJA2 in the cytoplasm and the cell membrane.	localization	0	1	C	N	0	IPA	29162697	Interference of human AKAP9 mRNA by siRNA decreases localization of human PRKAR2 [PRKAR2A] protein to centrosome from Sk Br 3 cells. Experiment Type: immunofluorescence	1	1	Scaffolding protein that assembles several protein kinases and phosphatases on the centrosome and Golgi apparatus. Required to maintain the integrity of the Golgi apparatus (PubMed:10202149, PubMed:15047863). Required for microtubule nucleation at the cis-side of the Golgi apparatus (PubMed:15047863, PubMed:19242490). Required for association of the centrosomes with the poles of the bipolar mitot…	NA	1		Cone photoreceptor cells: 2230.9;Rod photoreceptor cells: 1279.6				Regulatory subunit of the cAMP-dependent protein kinases involved in cAMP signaling in cells. Type II regulatory chains mediate membrane association by binding to anchoring proteins, including the MAP2 kinase.	NA	1	skeletal muscle: 83.5;testis: 83.1	Early spermatids: 788.7;Late spermatids: 1370.7
AKAP9	PRKAR2A	Golgi apparatus {ECO:0000269|PubMed:15047863, ECO:0000269|PubMed:19242490, ECO:0000269|PubMed:25217626, ECO:0000269|PubMed:27666745}. Cytoplasm {ECO:0000269|PubMed:9915845}. Cytoplasm, cytoskeleton, microtubule organizing center, centrosome {ECO:0000269|PubMed:12270714, ECO:0000269|PubMed:14654843, ECO:0000269|PubMed:25657325, ECO:0000269|PubMed:29162697, ECO:0000269|PubMed:9915845}. Note=Cytopla…	Cytoplasm {ECO:0000269|PubMed:21423175}. Cell membrane {ECO:0000269|PubMed:21423175}. Note=Colocalizes with PJA2 in the cytoplasm and the cell membrane.	protein-protein interactions	0	1	C	N	1	IPA	29162697	Binding of human AKAP9 protein and human PRKAR2A protein occurs. Experiment Type: affinity chromatography	1	1	Scaffolding protein that assembles several protein kinases and phosphatases on the centrosome and Golgi apparatus. Required to maintain the integrity of the Golgi apparatus (PubMed:10202149, PubMed:15047863). Required for microtubule nucleation at the cis-side of the Golgi apparatus (PubMed:15047863, PubMed:19242490). Required for association of the centrosomes with the poles of the bipolar mitot…	NA	1		Cone photoreceptor cells: 2230.9;Rod photoreceptor cells: 1279.6				Regulatory subunit of the cAMP-dependent protein kinases involved in cAMP signaling in cells. Type II regulatory chains mediate membrane association by binding to anchoring proteins, including the MAP2 kinase.	NA	1	skeletal muscle: 83.5;testis: 83.1	Early spermatids: 788.7;Late spermatids: 1370.7
AKAP9	RPA2	Golgi apparatus {ECO:0000269|PubMed:15047863, ECO:0000269|PubMed:19242490, ECO:0000269|PubMed:25217626, ECO:0000269|PubMed:27666745}. Cytoplasm {ECO:0000269|PubMed:9915845}. Cytoplasm, cytoskeleton, microtubule organizing center, centrosome {ECO:0000269|PubMed:12270714, ECO:0000269|PubMed:14654843, ECO:0000269|PubMed:25657325, ECO:0000269|PubMed:29162697, ECO:0000269|PubMed:9915845}. Note=Cytopla…	Nucleus {ECO:0000269|PubMed:10982866, ECO:0000269|PubMed:12814551, ECO:0000269|PubMed:20154705, ECO:0000269|PubMed:21504906}. Nucleus, PML body {ECO:0000269|PubMed:12814551}. Note=Redistributes to discrete nuclear foci upon DNA damage in an ATR-dependent manner. {ECO:0000269|PubMed:12814551}.	protein-protein interactions	1	0	0	0	0	IPA	0	0	1	0	Scaffolding protein that assembles several protein kinases and phosphatases on the centrosome and Golgi apparatus. Required to maintain the integrity of the Golgi apparatus (PubMed:10202149, PubMed:15047863). Required for microtubule nucleation at the cis-side of the Golgi apparatus (PubMed:15047863, PubMed:19242490). Required for association of the centrosomes with the poles of the bipolar mitot…	NA	1		Cone photoreceptor cells: 2230.9;Rod photoreceptor cells: 1279.6				As part of the heterotrimeric replication protein A complex (RPA/RP-A), binds and stabilizes single-stranded DNA intermediates, that form during DNA replication or upon DNA stress. It prevents their reannealing and in parallel, recruits and activates different proteins and complexes involved in DNA metabolism. Thereby, it plays an essential role both in DNA replication and the cellular response t…	NA	1		Spermatocytes: 162.3;Spermatogonia: 183.5
AKAP9	TNIK	Golgi apparatus {ECO:0000269|PubMed:15047863, ECO:0000269|PubMed:19242490, ECO:0000269|PubMed:25217626, ECO:0000269|PubMed:27666745}. Cytoplasm {ECO:0000269|PubMed:9915845}. Cytoplasm, cytoskeleton, microtubule organizing center, centrosome {ECO:0000269|PubMed:12270714, ECO:0000269|PubMed:14654843, ECO:0000269|PubMed:25657325, ECO:0000269|PubMed:29162697, ECO:0000269|PubMed:9915845}. Note=Cytopla…	Nucleus. Cytoplasm. Recycling endosome. Cytoplasm, cytoskeleton. Note=Associated with recycling endosomes and the cytoskeletal fraction upon RAP2A overexpression.	protein-protein interactions	1	1	C	0	0	IPA	0	0	1	0	Scaffolding protein that assembles several protein kinases and phosphatases on the centrosome and Golgi apparatus. Required to maintain the integrity of the Golgi apparatus (PubMed:10202149, PubMed:15047863). Required for microtubule nucleation at the cis-side of the Golgi apparatus (PubMed:15047863, PubMed:19242490). Required for association of the centrosomes with the poles of the bipolar mitot…	NA	1		Cone photoreceptor cells: 2230.9;Rod photoreceptor cells: 1279.6				Serine/threonine kinase that acts as an essential activator of the Wnt signaling pathway. Recruited to promoters of Wnt target genes and required to activate their expression. May act by phosphorylating TCF4/TCF7L2. Appears to act upstream of the JUN N-terminal pathway. May play a role in the response to environmental stress. Part of a signaling complex composed of NEDD4, RAP2A and TNIK which reg…	NA	1	brain: 36.1	Astrocytes: 1074.4;Excitatory neurons: 248.4;Inhibitory neurons: 360.8;Oligodendrocyte precursor cells: 374.5;Oligodendrocytes: 205.5
ALDH18A1	CMTM5	Mitochondrion inner membrane {ECO:0000269|PubMed:26297558, ECO:0000269|PubMed:26320891}.	Membrane; Multi-pass membrane protein.	protein-protein interactions	1	0	0	0	0	IPA	0	0	1	0	Bifunctional enzyme that converts glutamate to glutamate 5-semialdehyde, an intermediate in the biosynthesis of proline, ornithine and arginine. {ECO:0000269|PubMed:10037775, ECO:0000269|PubMed:11092761, ECO:0000269|PubMed:26297558, ECO:0000269|PubMed:26320891}.	NA	1	salivary gland: 121.1	Distal enterocytes: 80.5;Granulosa cells: 81.6;Proximal enterocytes: 79.4				NA	NA	1	brain: 185.9;choroid plexus: 55.1	Macrophages: 93.7;Muller glia cells: 32.0;Oligodendrocyte precursor cells: 20.6;Oligodendrocytes: 106.2
ALDH18A1	EDC4	Mitochondrion inner membrane {ECO:0000269|PubMed:26297558, ECO:0000269|PubMed:26320891}.	Cytoplasm, P-body {ECO:0000269|PubMed:16364915, ECO:0000269|PubMed:9067524}. Nucleus {ECO:0000269|PubMed:7520377}.	protein-protein interactions	1	0	0	0	0	IPA	0	0	1	1	Bifunctional enzyme that converts glutamate to glutamate 5-semialdehyde, an intermediate in the biosynthesis of proline, ornithine and arginine. {ECO:0000269|PubMed:10037775, ECO:0000269|PubMed:11092761, ECO:0000269|PubMed:26297558, ECO:0000269|PubMed:26320891}.	NA	1	salivary gland: 121.1	Distal enterocytes: 80.5;Granulosa cells: 81.6;Proximal enterocytes: 79.4				In the process of mRNA degradation, seems to play a role in mRNA decapping. Component of a complex containing DCP2 and DCP1A which functions in decapping of ARE-containing mRNAs. Promotes complex formation between DCP1A and DCP2. Enhances the catalytic activity of DCP2 (in vitro). {ECO:0000269|PubMed:16364915}.	NA	1		Alveolar cells type 1: 22.4;Alveolar cells type 2: 24.8;Excitatory neurons: 14.2;Gastric mucus-secreting cells: 15.3;Inhibitory neurons: 12.6;Oligodendrocytes: 13.6
ALDH18A1	ESR1	Mitochondrion inner membrane {ECO:0000269|PubMed:26297558, ECO:0000269|PubMed:26320891}.	[Isoform 1]: Nucleus {ECO:0000255|PROSITE-ProRule:PRU00407, ECO:0000269|PubMed:12682286, ECO:0000269|PubMed:20074560}. Cytoplasm {ECO:0000269|PubMed:12682286, ECO:0000269|PubMed:24498420}. Cell membrane {ECO:0000269|PubMed:12682286}; Peripheral membrane protein {ECO:0000269|PubMed:12682286}; Cytoplasmic side {ECO:0000269|PubMed:12682286}. Note=A minor fraction is associated with the inner membran…	protein-protein interactions	1	0	0	0	0	IPA	0	0	1	0	Bifunctional enzyme that converts glutamate to glutamate 5-semialdehyde, an intermediate in the biosynthesis of proline, ornithine and arginine. {ECO:0000269|PubMed:10037775, ECO:0000269|PubMed:11092761, ECO:0000269|PubMed:26297558, ECO:0000269|PubMed:26320891}.	NA	1	salivary gland: 121.1	Distal enterocytes: 80.5;Granulosa cells: 81.6;Proximal enterocytes: 79.4				Nuclear hormone receptor. The steroid hormones and their receptors are involved in the regulation of eukaryotic gene expression and affect cellular proliferation and differentiation in target tissues. Ligand-dependent nuclear transactivation involves either direct homodimer binding to a palindromic estrogen response element (ERE) sequence or association with other DNA-binding transcription factor…	NA	1	cervix: 84.5;endometrium 1: 111.9;fallopian tube: 65.5	Breast glandular cells: 86.6;Endometrial ciliated cells: 77.9;Endometrial stromal cells: 79.9;Glandular and luminal cells: 98.9;Hepatocytes: 52.1;Horizontal cells: 62.2;Skeletal myocytes: 56.7
ALDH18A1	GABRA2	Mitochondrion inner membrane {ECO:0000269|PubMed:26297558, ECO:0000269|PubMed:26320891}.	Cell junction, synapse, postsynaptic cell membrane {ECO:0000250|UniProtKB:P26048}; Multi-pass membrane protein {ECO:0000255}. Cell membrane {ECO:0000250|UniProtKB:P26048}; Multi-pass membrane protein {ECO:0000255}. Cytoplasmic vesicle membrane {ECO:0000250|UniProtKB:P23576}. Cell projection, dendrite {ECO:0000250|UniProtKB:P26048}.	protein-protein interactions	1	0	0	0	0	IPA	27044742	Binding of mouse Aldh18a1 protein and mouse Gabra2 protein in mouse brain occurs. Experiment Type: affinity purification-mass spectrometry	1	1	Bifunctional enzyme that converts glutamate to glutamate 5-semialdehyde, an intermediate in the biosynthesis of proline, ornithine and arginine. {ECO:0000269|PubMed:10037775, ECO:0000269|PubMed:11092761, ECO:0000269|PubMed:26297558, ECO:0000269|PubMed:26320891}.	NA	1	salivary gland: 121.1	Distal enterocytes: 80.5;Granulosa cells: 81.6;Proximal enterocytes: 79.4				Ligand-gated chloride channel which is a component of the heteropentameric receptor for GABA, the major inhibitory neurotransmitter in the brain (PubMed:29961870, PubMed:31032849). Plays an important role in the formation of functional inhibitory GABAergic synapses in addition to mediating synaptic inhibition as a GABA-gated ion channel (PubMed:29961870, PubMed:31032849). The gamma2 subunit is ne…	NA	1	brain: 31.9;epididymis: 8.9	Astrocytes: 425.4;Excitatory neurons: 156.2;Inhibitory neurons: 111.6
ALDH18A1	MARF1	Mitochondrion inner membrane {ECO:0000269|PubMed:26297558, ECO:0000269|PubMed:26320891}.	Peroxisome {ECO:0000269|PubMed:15932519}.	protein-protein interactions	1	0	0	0	0	IPA	0	0	1	0	Bifunctional enzyme that converts glutamate to glutamate 5-semialdehyde, an intermediate in the biosynthesis of proline, ornithine and arginine. {ECO:0000269|PubMed:10037775, ECO:0000269|PubMed:11092761, ECO:0000269|PubMed:26297558, ECO:0000269|PubMed:26320891}.	NA	1	salivary gland: 121.1	Distal enterocytes: 80.5;Granulosa cells: 81.6;Proximal enterocytes: 79.4				Essential regulator of oogenesis required for female meiotic progression to repress transposable elements and preventing their mobilization, which is essential for the germline integrity. Probably acts via some RNA metabolic process, equivalent to the piRNA system in males, which mediates the repression of transposable elements during meiosis by forming complexes composed of RNAs and governs the …	NA	1		Alveolar cells type 2: 28.7;Breast glandular cells: 26.3;Endometrial stromal cells: 27.5
ALDH18A1	PAM	Mitochondrion inner membrane {ECO:0000269|PubMed:26297558, ECO:0000269|PubMed:26320891}.	Cytoplasmic vesicle, secretory vesicle membrane {ECO:0000250|UniProtKB:P10731}; Single-pass membrane protein {ECO:0000250|UniProtKB:P10731}. Note=Secretory granules. {ECO:0000250|UniProtKB:P10731}.; [Isoform 1]: Membrane; Single-pass type I membrane protein.; [Isoform 2]: Membrane; Single-pass type I membrane protein.; [Isoform 3]: Secreted. Note=Secreted from secretory granules.; [Isoform 4]: Se…	protein-protein interactions	1	0	0	0	0	IPA	0	0	1	1	Bifunctional enzyme that converts glutamate to glutamate 5-semialdehyde, an intermediate in the biosynthesis of proline, ornithine and arginine. {ECO:0000269|PubMed:10037775, ECO:0000269|PubMed:11092761, ECO:0000269|PubMed:26297558, ECO:0000269|PubMed:26320891}.	NA	1	salivary gland: 121.1	Distal enterocytes: 80.5;Granulosa cells: 81.6;Proximal enterocytes: 79.4				Bifunctional enzyme that catalyzes the post-translational modification of inactive peptidylglycine precursors to the corresponding bioactive alpha-amidated peptides, a terminal modification in biosynthesis of many neural and endocrine peptides (PubMed:12699694). Alpha-amidation involves two sequential reactions, both of which are catalyzed by separate catalytic domains of the enzyme. The first st…	Zn(2+); Xref=ChEBI:CHEBI:29105; Evidence={ECO:0000269|PubMed:12699694}; Note=Binds one Zn(2+) ion per subunit. {ECO:0000250|UniProtKB:P14925}; Cu(2+); Xref=ChEBI:CHEBI:29036; Evidence={ECO:0000269|PubMed:12699694}; Note=Binds 2 Cu(2+) ions per subunit. {ECO:0000250|UniProtKB:P14925};	1	heart muscle: 1468.4	Cardiomyocytes: 1406.5;Enteroendocrine cells: 321.4;Inhibitory neurons: 487.7
ALDH18A1	PREX1	Mitochondrion inner membrane {ECO:0000269|PubMed:26297558, ECO:0000269|PubMed:26320891}.	Cytoplasm, cytosol. Cell membrane. Note=Mainly cytosolic. Some amount is apparently associated to the plasma membrane.	protein-protein interactions	1	0	0	0	0	IPA	0	0	1	0	Bifunctional enzyme that converts glutamate to glutamate 5-semialdehyde, an intermediate in the biosynthesis of proline, ornithine and arginine. {ECO:0000269|PubMed:10037775, ECO:0000269|PubMed:11092761, ECO:0000269|PubMed:26297558, ECO:0000269|PubMed:26320891}.	NA	1	salivary gland: 121.1	Distal enterocytes: 80.5;Granulosa cells: 81.6;Proximal enterocytes: 79.4				Functions as a RAC guanine nucleotide exchange factor (GEF), which activates the Rac proteins by exchanging bound GDP for free GTP. Its activity is synergistically activated by phosphatidylinositol 3,4,5-trisphosphate and the beta gamma subunits of heterotrimeric G protein. May function downstream of heterotrimeric G proteins in neutrophils.	NA	1	bone marrow: 53.0;brain: 75.0	Astrocytes: 87.1;dendritic cells: 84.0;Kupffer cells: 104.7;Macrophages: 76.5;Microglial cells: 95.5;NK-cells: 90.6;Oligodendrocytes: 190.2
ALDH18A1	SYCE1L	Mitochondrion inner membrane {ECO:0000269|PubMed:26297558, ECO:0000269|PubMed:26320891}.	NA	protein-protein interactions	1	0	0	0	0	IPA	0	0	1	0	Bifunctional enzyme that converts glutamate to glutamate 5-semialdehyde, an intermediate in the biosynthesis of proline, ornithine and arginine. {ECO:0000269|PubMed:10037775, ECO:0000269|PubMed:11092761, ECO:0000269|PubMed:26297558, ECO:0000269|PubMed:26320891}.	NA	1	salivary gland: 121.1	Distal enterocytes: 80.5;Granulosa cells: 81.6;Proximal enterocytes: 79.4				May be involved in meiosis. {ECO:0000250}.	NA	1	testis: 23.7	Breast glandular cells: 89.5;Breast myoepithelial cells: 125.7
ALDH18A1	TUBGCP5	Mitochondrion inner membrane {ECO:0000269|PubMed:26297558, ECO:0000269|PubMed:26320891}.	Cytoplasm, cytoskeleton, microtubule organizing center, centrosome {ECO:0000269|PubMed:14654843}.	protein-protein interactions	1	0	0	0	0	IPA	0	0	1	0	Bifunctional enzyme that converts glutamate to glutamate 5-semialdehyde, an intermediate in the biosynthesis of proline, ornithine and arginine. {ECO:0000269|PubMed:10037775, ECO:0000269|PubMed:11092761, ECO:0000269|PubMed:26297558, ECO:0000269|PubMed:26320891}.	NA	1	salivary gland: 121.1	Distal enterocytes: 80.5;Granulosa cells: 81.6;Proximal enterocytes: 79.4				Gamma-tubulin complex is necessary for microtubule nucleation at the centrosome.	NA	1
ALDH18A1	WWOX	Mitochondrion inner membrane {ECO:0000269|PubMed:26297558, ECO:0000269|PubMed:26320891}.	Cytoplasm {ECO:0000269|PubMed:14695174, ECO:0000269|PubMed:15070730, ECO:0000269|PubMed:16219768, ECO:0000269|PubMed:19366691, ECO:0000269|PubMed:19465938}. Nucleus {ECO:0000269|PubMed:14695174, ECO:0000269|PubMed:15064722, ECO:0000269|PubMed:16219768, ECO:0000269|PubMed:19366691}. Mitochondrion {ECO:0000269|PubMed:14695174}. Golgi apparatus {ECO:0000305}. Note=Partially localizes to the mitochon…	protein-protein interactions	1	1	0	0	0	IPA	30619736	Binding of human ALDH18A1 protein and human WWOX protein occurs. Experiment Type: affinity chromatography	1	0	Bifunctional enzyme that converts glutamate to glutamate 5-semialdehyde, an intermediate in the biosynthesis of proline, ornithine and arginine. {ECO:0000269|PubMed:10037775, ECO:0000269|PubMed:11092761, ECO:0000269|PubMed:26297558, ECO:0000269|PubMed:26320891}.	NA	1	salivary gland: 121.1	Distal enterocytes: 80.5;Granulosa cells: 81.6;Proximal enterocytes: 79.4				Putative oxidoreductase. Acts as a tumor suppressor and plays a role in apoptosis. Required for normal bone development (By similarity). May function synergistically with p53/TP53 to control genotoxic stress-induced cell death. Plays a role in TGFB1 signaling and TGFB1-mediated cell death. May also play a role in tumor necrosis factor (TNF)-mediated cell death. Inhibits Wnt signaling, probably by…	NA	1		Astrocytes: 927.8;Excitatory neurons: 270.5;Inhibitory neurons: 540.9;Microglial cells: 471.2;Oligodendrocyte precursor cells: 914.9;Oligodendrocytes: 793.5
ALDH7A1	BT (betaine)	Cytoplasm, cytosol {ECO:0000269|PubMed:20207735}. Nucleus {ECO:0000269|PubMed:20207735}.; [Isoform 1]: Mitochondrion {ECO:0000269|PubMed:20207735}.	Cytoplasm {ECO:0000269|PubMed:14695174, ECO:0000269|PubMed:15070730, ECO:0000269|PubMed:16219768, ECO:0000269|PubMed:19366691, ECO:0000269|PubMed:19465938}. Nucleus {ECO:0000269|PubMed:14695174, ECO:0000269|PubMed:15064722, ECO:0000269|PubMed:16219768, ECO:0000269|PubMed:19366691}. Mitochondrion {ECO:0000269|PubMed:14695174}. Golgi apparatus {ECO:0000305}. Note=Partially localizes to the mitochon…	conversion		1	MC	N	1	Uniprot	20207735	ALDH7A1 metabolizes betaine aldehyde to betaine.	1	0	Multifunctional enzyme mediating important protective effects. Metabolizes betaine aldehyde to betaine, an important cellular osmolyte and methyl donor. Protects cells from oxidative stress by metabolizing a number of lipid peroxidation-derived aldehydes. Involved in lysine catabolism. {ECO:0000269|PubMed:16491085, ECO:0000269|PubMed:20207735}.	NA	1	liver: 163.6	Cytotrophoblasts: 414.1;Proximal tubular cells: 302.1;Syncytiotrophoblasts: 222.3
ALDH7A1	BHLHE40	Cytoplasm, cytosol {ECO:0000269|PubMed:20207735}. Nucleus {ECO:0000269|PubMed:20207735}.; [Isoform 1]: Mitochondrion {ECO:0000269|PubMed:20207735}.	Cytoplasm {ECO:0000269|PubMed:21829689}. Nucleus {ECO:0000269|PubMed:11278694, ECO:0000269|PubMed:21829689, ECO:0000269|PubMed:28797635}. Note=Predominantly localized in the nucleus (PubMed:11278694). {ECO:0000269|PubMed:11278694}.	expression	1	1	0	0	0	IPA	34551158	Mutation of mouse Bhlhe40 gene to homozygous mutant mouse Bhlhe40 gene (knockout) in myeloid cells from Mus (mouse) decreases expression of mouse Aldh7a1 mRNA in cultured Mus (mouse) peritoneal-elicited macrophages that is increased by LPS [lipopolysaccharide]. Experiment Type: RNA sequence analysis	1	0	Multifunctional enzyme mediating important protective effects. Metabolizes betaine aldehyde to betaine, an important cellular osmolyte and methyl donor. Protects cells from oxidative stress by metabolizing a number of lipid peroxidation-derived aldehydes. Involved in lysine catabolism. {ECO:0000269|PubMed:16491085, ECO:0000269|PubMed:20207735}.	NA	1	liver: 163.6	Cytotrophoblasts: 414.1;Proximal tubular cells: 302.1;Syncytiotrophoblasts: 222.3				Transcriptional repressor involved in the regulation of the circadian rhythm by negatively regulating the activity of the clock genes and clock-controlled genes (PubMed:12397359, PubMed:18411297). Acts as the negative limb of a novel autoregulatory feedback loop (DEC loop) which differs from the one formed by the PER and CRY transcriptional repressors (PER/CRY loop) (PubMed:14672706). Both these …	NA	1		Glandular and luminal cells: 386.7;granulocytes: 439.2;Squamous epithelial cells: 517.2
ALDH7A1	EGFR	Cytoplasm, cytosol {ECO:0000269|PubMed:20207735}. Nucleus {ECO:0000269|PubMed:20207735}.; [Isoform 1]: Mitochondrion {ECO:0000269|PubMed:20207735}.	Cell membrane {ECO:0000269|PubMed:17182860, ECO:0000269|PubMed:20462955, ECO:0000269|PubMed:23589287, ECO:0000269|PubMed:27153536, ECO:0000269|PubMed:2790960}; Single-pass type I membrane protein {ECO:0000269|PubMed:27153536}. Endoplasmic reticulum membrane {ECO:0000269|PubMed:27153536}; Single-pass type I membrane protein. Golgi apparatus membrane; Single-pass type I membrane protein. Nucleus me…	protein-protein interactions	1	1	0	0	0	IPA	0	0	1	0	Multifunctional enzyme mediating important protective effects. Metabolizes betaine aldehyde to betaine, an important cellular osmolyte and methyl donor. Protects cells from oxidative stress by metabolizing a number of lipid peroxidation-derived aldehydes. Involved in lysine catabolism. {ECO:0000269|PubMed:16491085, ECO:0000269|PubMed:20207735}.	NA	1	liver: 163.6	Cytotrophoblasts: 414.1;Proximal tubular cells: 302.1;Syncytiotrophoblasts: 222.3				Receptor tyrosine kinase binding ligands of the EGF family and activating several signaling cascades to convert extracellular cues into appropriate cellular responses (PubMed:2790960, PubMed:10805725, PubMed:27153536). Known ligands include EGF, TGFA/TGF-alpha, AREG, epigen/EPGN, BTC/betacellulin, epiregulin/EREG and HBEGF/heparin-binding EGF (PubMed:2790960, PubMed:7679104, PubMed:8144591, PubMe…	NA	1	placenta: 68.5	Cytotrophoblasts: 287.9;Skeletal myocytes: 251.2;Syncytiotrophoblasts: 376.8
ALDH7A1	POLR3C	Cytoplasm, cytosol {ECO:0000269|PubMed:20207735}. Nucleus {ECO:0000269|PubMed:20207735}.; [Isoform 1]: Mitochondrion {ECO:0000269|PubMed:20207735}.	Nucleus {ECO:0000250}.	protein-protein interactions	1	1	0	0	0	IPA	0	0	1	0	Multifunctional enzyme mediating important protective effects. Metabolizes betaine aldehyde to betaine, an important cellular osmolyte and methyl donor. Protects cells from oxidative stress by metabolizing a number of lipid peroxidation-derived aldehydes. Involved in lysine catabolism. {ECO:0000269|PubMed:16491085, ECO:0000269|PubMed:20207735}.	NA	1	liver: 163.6	Cytotrophoblasts: 414.1;Proximal tubular cells: 302.1;Syncytiotrophoblasts: 222.3				DNA-dependent RNA polymerase catalyzes the transcription of DNA into RNA using the four ribonucleoside triphosphates as substrates. Specific core component of RNA polymerase III which synthesizes small RNAs, such as 5S rRNA and tRNAs. May direct with other members of the subcomplex RNA Pol III binding to the TFIIIB-DNA complex via the interactions between TFIIIB and POLR3F. May be involved either…	NA	1		Early spermatids: 288.2;Late spermatids: 574.5
ALDH7A1	WWOX	Cytoplasm, cytosol {ECO:0000269|PubMed:20207735}. Nucleus {ECO:0000269|PubMed:20207735}.; [Isoform 1]: Mitochondrion {ECO:0000269|PubMed:20207735}.	Cytoplasm {ECO:0000269|PubMed:14695174, ECO:0000269|PubMed:15070730, ECO:0000269|PubMed:16219768, ECO:0000269|PubMed:19366691, ECO:0000269|PubMed:19465938}. Nucleus {ECO:0000269|PubMed:14695174, ECO:0000269|PubMed:15064722, ECO:0000269|PubMed:16219768, ECO:0000269|PubMed:19366691}. Mitochondrion {ECO:0000269|PubMed:14695174}. Golgi apparatus {ECO:0000305}. Note=Partially localizes to the mitochon…	protein-protein interactions	1	1	0	0	0	IPA	0	0	1	0	Multifunctional enzyme mediating important protective effects. Metabolizes betaine aldehyde to betaine, an important cellular osmolyte and methyl donor. Protects cells from oxidative stress by metabolizing a number of lipid peroxidation-derived aldehydes. Involved in lysine catabolism. {ECO:0000269|PubMed:16491085, ECO:0000269|PubMed:20207735}.	NA	1	liver: 163.6	Cytotrophoblasts: 414.1;Proximal tubular cells: 302.1;Syncytiotrophoblasts: 222.3				Putative oxidoreductase. Acts as a tumor suppressor and plays a role in apoptosis. Required for normal bone development (By similarity). May function synergistically with p53/TP53 to control genotoxic stress-induced cell death. Plays a role in TGFB1 signaling and TGFB1-mediated cell death. May also play a role in tumor necrosis factor (TNF)-mediated cell death. Inhibits Wnt signaling, probably by…	NA	1		Astrocytes: 927.8;Excitatory neurons: 270.5;Inhibitory neurons: 540.9;Microglial cells: 471.2;Oligodendrocyte precursor cells: 914.9;Oligodendrocytes: 793.5
ALPK3	HMGN2	Nucleus {ECO:0000250|UniProtKB:Q924C5}.	Nucleus {ECO:0000269|PubMed:10739259}. Cytoplasm {ECO:0000269|PubMed:10739259}. Note=Cytoplasmic enrichment upon phosphorylation.	protein-protein interactions	1	1	0	0	0	IPA	0	0	1	0	Involved in cardiomyocyte differentiation. {ECO:0000305|PubMed:26846950, ECO:0000305|PubMed:27106955, ECO:0000305|PubMed:28630369, ECO:0000305|PubMed:30046096}.	NA	1	heart muscle: 54.5;skeletal muscle: 197.4;tongue: 59.6	Cardiomyocytes: 64.1;Exocrine glandular cells: 20.5;Skeletal myocytes: 51.9				Binds to the inner side of the nucleosomal DNA thus altering the interaction between the DNA and the histone octamer. May be involved in the process which maintains transcribable genes in a unique chromatin conformation (By similarity). {ECO:0000250}.	NA	1
AMH	CDKN1A	Secreted.	Cytoplasm {ECO:0000269|PubMed:11463845}. Nucleus {ECO:0000269|PubMed:11463845, ECO:0000269|PubMed:23213251}.	expression	0	1	0	0	0	IPA	10958795	MIS [AMH] protein in cell culture increases expression of human p21 [CDKN1A] protein in ovcar 8 cells.	1	1	This glycoprotein, produced by the Sertoli cells of the testis, causes regression of the Muellerian duct. It is also able to inhibit the growth of tumors derived from tissues of Muellerian duct origin.	NA	1	pituitary gland: 3.9;testis: 10.5	Granulosa cells: 1567.5				May be involved in p53/TP53 mediated inhibition of cellular proliferation in response to DNA damage. Binds to and inhibits cyclin-dependent kinase activity, preventing phosphorylation of critical cyclin-dependent kinase substrates and blocking cell cycle progression. Functions in the nuclear localization and assembly of cyclin D-CDK4 complex and promotes its kinase activity towards RB1. At higher…	NA	1				olfactory bulb: 76.0
AMH	GPR37	Secreted.	Cell membrane {ECO:0000269|PubMed:17059562}; Multi-pass membrane protein {ECO:0000269|PubMed:17059562}. Endoplasmic reticulum membrane {ECO:0000269|PubMed:17059562}; Multi-pass membrane protein {ECO:0000269|PubMed:17059562}.	expression	1	1	0	0	0	IPA	25609427	In mouse, homozygous mutant mouse Gpr37 gene (knockout) decreases expression of mouse Amh protein in testis from prepubertal mouse. Experiment Type: immunoblot	1	0	This glycoprotein, produced by the Sertoli cells of the testis, causes regression of the Muellerian duct. It is also able to inhibit the growth of tumors derived from tissues of Muellerian duct origin.	NA	1	pituitary gland: 3.9;testis: 10.5	Granulosa cells: 1567.5				Receptor for the neuroprotective and glioprotective factor prosaposin. Ligand binding induces endocytosis, followed by an ERK phosphorylation cascade. {ECO:0000269|PubMed:11439185, ECO:0000269|PubMed:23690594, ECO:0000269|PubMed:9526070}.	NA	1	brain: 109.0;retina: 39.4	Muller glia cells: 616.6;Oligodendrocytes: 324.9
ANK3	AGRN	Cytoplasm, cytoskeleton {ECO:0000269|PubMed:21223964}. Cell projection, axon {ECO:0000250|UniProtKB:O70511}. Cell membrane, sarcolemma {ECO:0000269|PubMed:21223964}. Cell junction, synapse, postsynaptic cell membrane {ECO:0000250|UniProtKB:O70511}. Lysosome {ECO:0000250|UniProtKB:G5E8K5}. Cell membrane, sarcolemma, T-tubule {ECO:0000250|UniProtKB:O70511}. Note=In skeletal muscle, localized at cos…	[Isoform 1]: Secreted, extracellular space, extracellular matrix {ECO:0000269|PubMed:20551380}. Note=Synaptic basal lamina at the neuromuscular junction. {ECO:0000250|UniProtKB:P31696}.; [Isoform 2]: Cell junction, synapse {ECO:0000250|UniProtKB:A2ASQ1}. Cell membrane {ECO:0000250|UniProtKB:A2ASQ1}; Single-pass type II membrane protein {ECO:0000250|UniProtKB:A2ASQ1}.	protein-protein interactions	0	1	CS/CM	N	1	IPA	29872149	Binding of human AGRN protein and human ANK3 protein occurs.	1	1	In skeletal muscle, required for costamere localization of DMD and betaDAG1 (By similarity). Membrane-cytoskeleton linker. May participate in the maintenance/targeting of ion channels and cell adhesion molecules at the nodes of Ranvier and axonal initial segments. Regulates KCNA1 channel activity in function of dietary Mg(2+) levels, and thereby contributes to the regulation of renal Mg(2+) reabs…	NA	1		Bipolar cells: 490.2;Excitatory neurons: 859.2;Inhibitory neurons: 881.3;Oligodendrocyte precursor cells: 592.6;Oligodendrocytes: 1579.5				[Isoform 1]: heparan sulfate basal lamina glycoprotein that plays a central role in the formation and the maintenance of the neuromuscular junction (NMJ) and directs key events in postsynaptic differentiation. Component of the AGRN-LRP4 receptor complex that induces the phosphorylation and activation of MUSK. The activation of MUSK in myotubes induces the formation of NMJ by regulating different …	NA	1		Basal respiratory cells: 94.5;Collecting duct cells: 156.3;Ductal cells: 91.2;Pancreatic endocrine cells: 87.3
ANK3	ARVCF	Cytoplasm, cytoskeleton {ECO:0000269|PubMed:21223964}. Cell projection, axon {ECO:0000250|UniProtKB:O70511}. Cell membrane, sarcolemma {ECO:0000269|PubMed:21223964}. Cell junction, synapse, postsynaptic cell membrane {ECO:0000250|UniProtKB:O70511}. Lysosome {ECO:0000250|UniProtKB:G5E8K5}. Cell membrane, sarcolemma, T-tubule {ECO:0000250|UniProtKB:O70511}. Note=In skeletal muscle, localized at cos…	NA;adherens junction; cytoplasm; nucleus; plasma membrane	protein-protein interactions	1	1	0	0	0	IPA	0	0	1	0	In skeletal muscle, required for costamere localization of DMD and betaDAG1 (By similarity). Membrane-cytoskeleton linker. May participate in the maintenance/targeting of ion channels and cell adhesion molecules at the nodes of Ranvier and axonal initial segments. Regulates KCNA1 channel activity in function of dietary Mg(2+) levels, and thereby contributes to the regulation of renal Mg(2+) reabs…	NA	1		Bipolar cells: 490.2;Excitatory neurons: 859.2;Inhibitory neurons: 881.3;Oligodendrocyte precursor cells: 592.6;Oligodendrocytes: 1579.5				Involved in protein-protein interactions at adherens junctions.	NA	1		Astrocytes: 24.2;Cone photoreceptor cells: 22.9;Muller glia cells: 21.7
ANK3	ESR1	Cytoplasm, cytoskeleton {ECO:0000269|PubMed:21223964}. Cell projection, axon {ECO:0000250|UniProtKB:O70511}. Cell membrane, sarcolemma {ECO:0000269|PubMed:21223964}. Cell junction, synapse, postsynaptic cell membrane {ECO:0000250|UniProtKB:O70511}. Lysosome {ECO:0000250|UniProtKB:G5E8K5}. Cell membrane, sarcolemma, T-tubule {ECO:0000250|UniProtKB:O70511}. Note=In skeletal muscle, localized at cos…	[Isoform 1]: Nucleus {ECO:0000255|PROSITE-ProRule:PRU00407, ECO:0000269|PubMed:12682286, ECO:0000269|PubMed:20074560}. Cytoplasm {ECO:0000269|PubMed:12682286, ECO:0000269|PubMed:24498420}. Cell membrane {ECO:0000269|PubMed:12682286}; Peripheral membrane protein {ECO:0000269|PubMed:12682286}; Cytoplasmic side {ECO:0000269|PubMed:12682286}. Note=A minor fraction is associated with the inner membran…	expression	1	1	0	0	0	IPA	0	0	1	0	In skeletal muscle, required for costamere localization of DMD and betaDAG1 (By similarity). Membrane-cytoskeleton linker. May participate in the maintenance/targeting of ion channels and cell adhesion molecules at the nodes of Ranvier and axonal initial segments. Regulates KCNA1 channel activity in function of dietary Mg(2+) levels, and thereby contributes to the regulation of renal Mg(2+) reabs…	NA	1		Bipolar cells: 490.2;Excitatory neurons: 859.2;Inhibitory neurons: 881.3;Oligodendrocyte precursor cells: 592.6;Oligodendrocytes: 1579.5				Nuclear hormone receptor. The steroid hormones and their receptors are involved in the regulation of eukaryotic gene expression and affect cellular proliferation and differentiation in target tissues. Ligand-dependent nuclear transactivation involves either direct homodimer binding to a palindromic estrogen response element (ERE) sequence or association with other DNA-binding transcription factor…	NA	1	cervix: 84.5;endometrium 1: 111.9;fallopian tube: 65.5	Breast glandular cells: 86.6;Endometrial ciliated cells: 77.9;Endometrial stromal cells: 79.9;Glandular and luminal cells: 98.9;Hepatocytes: 52.1;Horizontal cells: 62.2;Skeletal myocytes: 56.7
ANK3	MAP1LC3B	Cytoplasm, cytoskeleton {ECO:0000269|PubMed:21223964}. Cell projection, axon {ECO:0000250|UniProtKB:O70511}. Cell membrane, sarcolemma {ECO:0000269|PubMed:21223964}. Cell junction, synapse, postsynaptic cell membrane {ECO:0000250|UniProtKB:O70511}. Lysosome {ECO:0000250|UniProtKB:G5E8K5}. Cell membrane, sarcolemma, T-tubule {ECO:0000250|UniProtKB:O70511}. Note=In skeletal muscle, localized at cos…	Cytoplasm, cytoskeleton. Endomembrane system; Lipid-anchor. Cytoplasmic vesicle, autophagosome membrane {ECO:0000269|PubMed:20529957, ECO:0000269|PubMed:23459205, ECO:0000269|PubMed:33499712}; Lipid-anchor. Note=LC3-II binds to the autophagic membranes. LC3-II localizes with the mitochondrial inner membrane during Parkin-mediated mitophagy (PubMed:28017329). Localizes also to discrete punctae alo…	protein-protein interactions	1	1	0	0	0	IPA	0	0	1	0	In skeletal muscle, required for costamere localization of DMD and betaDAG1 (By similarity). Membrane-cytoskeleton linker. May participate in the maintenance/targeting of ion channels and cell adhesion molecules at the nodes of Ranvier and axonal initial segments. Regulates KCNA1 channel activity in function of dietary Mg(2+) levels, and thereby contributes to the regulation of renal Mg(2+) reabs…	NA	1		Bipolar cells: 490.2;Excitatory neurons: 859.2;Inhibitory neurons: 881.3;Oligodendrocyte precursor cells: 592.6;Oligodendrocytes: 1579.5				Ubiquitin-like modifier involved in formation of autophagosomal vacuoles (autophagosomes). Plays a role in mitophagy which contributes to regulate mitochondrial quantity and quality by eliminating the mitochondria to a basal level to fulfill cellular energy requirements and preventing excess ROS production (PubMed:28017329). In response to cellular stress and upon mitochondria fission, binds C-18…	NA	1
ANK3	NRCAM	Cytoplasm, cytoskeleton {ECO:0000269|PubMed:21223964}. Cell projection, axon {ECO:0000250|UniProtKB:O70511}. Cell membrane, sarcolemma {ECO:0000269|PubMed:21223964}. Cell junction, synapse, postsynaptic cell membrane {ECO:0000250|UniProtKB:O70511}. Lysosome {ECO:0000250|UniProtKB:G5E8K5}. Cell membrane, sarcolemma, T-tubule {ECO:0000250|UniProtKB:O70511}. Note=In skeletal muscle, localized at cos…	Cell membrane {ECO:0000250|UniProtKB:Q810U4}; Single-pass type I membrane protein {ECO:0000250|UniProtKB:Q810U4}. Cell projection, axon {ECO:0000250|UniProtKB:Q810U4}. Secreted {ECO:0000250|UniProtKB:Q810U4}. Note=Detected at nodes of Ranvier. {ECO:0000250|UniProtKB:Q810U4}.	localization	0	1	0	0	0	IPA	17709431	Interference of rat Ankyrin G [Ank3] gene by Shrna decreases localization of rat Nrcam protein to axon initial segments from cultured hippocampal neurons of 18.0 day-old embryonic rat. Experiment Type: immunofluorescence	1	0	In skeletal muscle, required for costamere localization of DMD and betaDAG1 (By similarity). Membrane-cytoskeleton linker. May participate in the maintenance/targeting of ion channels and cell adhesion molecules at the nodes of Ranvier and axonal initial segments. Regulates KCNA1 channel activity in function of dietary Mg(2+) levels, and thereby contributes to the regulation of renal Mg(2+) reabs…	NA	1		Bipolar cells: 490.2;Excitatory neurons: 859.2;Inhibitory neurons: 881.3;Oligodendrocyte precursor cells: 592.6;Oligodendrocytes: 1579.5				Cell adhesion protein that is required for normal responses to cell-cell contacts in brain and in the peripheral nervous system. Plays a role in neurite outgrowth in response to contactin binding. Plays a role in mediating cell-cell contacts between Schwann cells and axons. Plays a role in the formation and maintenance of the nodes of Ranvier on myelinated axons. Nodes of Ranvier contain clustere…	NA	1	adrenal gland: 37.7;brain: 37.6;epididymis: 34.7;retina: 38.3	Astrocytes: 612.5;Excitatory neurons: 764.5;Inhibitory neurons: 392.4;Oligodendrocyte precursor cells: 1259.2
ANK3	NRCAM	Cytoplasm, cytoskeleton {ECO:0000269|PubMed:21223964}. Cell projection, axon {ECO:0000250|UniProtKB:O70511}. Cell membrane, sarcolemma {ECO:0000269|PubMed:21223964}. Cell junction, synapse, postsynaptic cell membrane {ECO:0000250|UniProtKB:O70511}. Lysosome {ECO:0000250|UniProtKB:G5E8K5}. Cell membrane, sarcolemma, T-tubule {ECO:0000250|UniProtKB:O70511}. Note=In skeletal muscle, localized at cos…	Cell membrane {ECO:0000250|UniProtKB:Q810U4}; Single-pass type I membrane protein {ECO:0000250|UniProtKB:Q810U4}. Cell projection, axon {ECO:0000250|UniProtKB:Q810U4}. Secreted {ECO:0000250|UniProtKB:Q810U4}. Note=Detected at nodes of Ranvier. {ECO:0000250|UniProtKB:Q810U4}.	expression	1	1	0	0	0	IPA	24719088	In mouse, homozygous mutant mouse Gliomedin [Gldn] gene (knockout) and homozygous mutant mouse Nrcam gene (knockout) decrease expression of mouse Ankyrin-G [Ank3] protein in mouse sciatic nerve. Experiment Type: immunolabelling	1	0	In skeletal muscle, required for costamere localization of DMD and betaDAG1 (By similarity). Membrane-cytoskeleton linker. May participate in the maintenance/targeting of ion channels and cell adhesion molecules at the nodes of Ranvier and axonal initial segments. Regulates KCNA1 channel activity in function of dietary Mg(2+) levels, and thereby contributes to the regulation of renal Mg(2+) reabs…	NA	1		Bipolar cells: 490.2;Excitatory neurons: 859.2;Inhibitory neurons: 881.3;Oligodendrocyte precursor cells: 592.6;Oligodendrocytes: 1579.5				Cell adhesion protein that is required for normal responses to cell-cell contacts in brain and in the peripheral nervous system. Plays a role in neurite outgrowth in response to contactin binding. Plays a role in mediating cell-cell contacts between Schwann cells and axons. Plays a role in the formation and maintenance of the nodes of Ranvier on myelinated axons. Nodes of Ranvier contain clustere…	NA	1	adrenal gland: 37.7;brain: 37.6;epididymis: 34.7;retina: 38.3	Astrocytes: 612.5;Excitatory neurons: 764.5;Inhibitory neurons: 392.4;Oligodendrocyte precursor cells: 1259.2
ANK3	NRCAM	Cytoplasm, cytoskeleton {ECO:0000269|PubMed:21223964}. Cell projection, axon {ECO:0000250|UniProtKB:O70511}. Cell membrane, sarcolemma {ECO:0000269|PubMed:21223964}. Cell junction, synapse, postsynaptic cell membrane {ECO:0000250|UniProtKB:O70511}. Lysosome {ECO:0000250|UniProtKB:G5E8K5}. Cell membrane, sarcolemma, T-tubule {ECO:0000250|UniProtKB:O70511}. Note=In skeletal muscle, localized at cos…	Cell membrane {ECO:0000250|UniProtKB:Q810U4}; Single-pass type I membrane protein {ECO:0000250|UniProtKB:Q810U4}. Cell projection, axon {ECO:0000250|UniProtKB:Q810U4}. Secreted {ECO:0000250|UniProtKB:Q810U4}. Note=Detected at nodes of Ranvier. {ECO:0000250|UniProtKB:Q810U4}.	localization	1	1	0	0	0	IPA	17709431	Interference of rat Nrcam gene by Shrna causes little or no change in localization of rat Ankyrin G [Ank3] protein to axon initial segments from cultured hippocampal neurons of 18.0 day-old embryonic rat. Experiment Type: immunofluorescence	1	0	In skeletal muscle, required for costamere localization of DMD and betaDAG1 (By similarity). Membrane-cytoskeleton linker. May participate in the maintenance/targeting of ion channels and cell adhesion molecules at the nodes of Ranvier and axonal initial segments. Regulates KCNA1 channel activity in function of dietary Mg(2+) levels, and thereby contributes to the regulation of renal Mg(2+) reabs…	NA	1		Bipolar cells: 490.2;Excitatory neurons: 859.2;Inhibitory neurons: 881.3;Oligodendrocyte precursor cells: 592.6;Oligodendrocytes: 1579.5				Cell adhesion protein that is required for normal responses to cell-cell contacts in brain and in the peripheral nervous system. Plays a role in neurite outgrowth in response to contactin binding. Plays a role in mediating cell-cell contacts between Schwann cells and axons. Plays a role in the formation and maintenance of the nodes of Ranvier on myelinated axons. Nodes of Ranvier contain clustere…	NA	1	adrenal gland: 37.7;brain: 37.6;epididymis: 34.7;retina: 38.3	Astrocytes: 612.5;Excitatory neurons: 764.5;Inhibitory neurons: 392.4;Oligodendrocyte precursor cells: 1259.2
ANK3	OBSCN	Cytoplasm, cytoskeleton {ECO:0000269|PubMed:21223964}. Cell projection, axon {ECO:0000250|UniProtKB:O70511}. Cell membrane, sarcolemma {ECO:0000269|PubMed:21223964}. Cell junction, synapse, postsynaptic cell membrane {ECO:0000250|UniProtKB:O70511}. Lysosome {ECO:0000250|UniProtKB:G5E8K5}. Cell membrane, sarcolemma, T-tubule {ECO:0000250|UniProtKB:O70511}. Note=In skeletal muscle, localized at cos…	[Isoform 3]: Cytoplasm, myofibril, sarcomere, M line {ECO:0000269|PubMed:12527750}. Cytoplasm, myofibril, sarcomere, Z line {ECO:0000269|PubMed:12527750}. Note=In differentiating skeletal muscle cells, isoform 3 primarily localizes to the sarcomeric M-line and less frequently to the Z-disk (PubMed:12527750). Isoform 3 colocalizes with ANK1 isoform Mu17/ank1.5 at the M-line in differentiated skele…	protein-protein interactions	1	1	0	0	0	IPA	0	0	1	0	In skeletal muscle, required for costamere localization of DMD and betaDAG1 (By similarity). Membrane-cytoskeleton linker. May participate in the maintenance/targeting of ion channels and cell adhesion molecules at the nodes of Ranvier and axonal initial segments. Regulates KCNA1 channel activity in function of dietary Mg(2+) levels, and thereby contributes to the regulation of renal Mg(2+) reabs…	NA	1		Bipolar cells: 490.2;Excitatory neurons: 859.2;Inhibitory neurons: 881.3;Oligodendrocyte precursor cells: 592.6;Oligodendrocytes: 1579.5				Structural component of striated muscles which plays a role in myofibrillogenesis. Probably involved in the assembly of myosin into sarcomeric A bands in striated muscle (PubMed:11448995, PubMed:16205939). Has serine/threonine protein kinase activity and phosphorylates N-cadherin CDH2 and sodium/potassium-transporting ATPase subunit ATP1B1 (By similarity). Binds (via the PH domain) strongly to ph…	Mg(2+); Xref=ChEBI:CHEBI:18420; Evidence={ECO:0000250|UniProtKB:A2AAJ9};	1	skeletal muscle: 485.2	Cardiomyocytes: 155.8
ANK3	PALM2AKAP2	Cytoplasm, cytoskeleton {ECO:0000269|PubMed:21223964}. Cell projection, axon {ECO:0000250|UniProtKB:O70511}. Cell membrane, sarcolemma {ECO:0000269|PubMed:21223964}. Cell junction, synapse, postsynaptic cell membrane {ECO:0000250|UniProtKB:O70511}. Lysosome {ECO:0000250|UniProtKB:G5E8K5}. Cell membrane, sarcolemma, T-tubule {ECO:0000250|UniProtKB:O70511}. Note=In skeletal muscle, localized at cos…	NA	protein-protein interactions	1	0	0	0	0	IPA	0	0	1	0	In skeletal muscle, required for costamere localization of DMD and betaDAG1 (By similarity). Membrane-cytoskeleton linker. May participate in the maintenance/targeting of ion channels and cell adhesion molecules at the nodes of Ranvier and axonal initial segments. Regulates KCNA1 channel activity in function of dietary Mg(2+) levels, and thereby contributes to the regulation of renal Mg(2+) reabs…	NA	1		Bipolar cells: 490.2;Excitatory neurons: 859.2;Inhibitory neurons: 881.3;Oligodendrocyte precursor cells: 592.6;Oligodendrocytes: 1579.5				NA	NA	1		Cardiomyocytes: 1.2
ANK3	SCN5A	Cytoplasm, cytoskeleton {ECO:0000269|PubMed:21223964}. Cell projection, axon {ECO:0000250|UniProtKB:O70511}. Cell membrane, sarcolemma {ECO:0000269|PubMed:21223964}. Cell junction, synapse, postsynaptic cell membrane {ECO:0000250|UniProtKB:O70511}. Lysosome {ECO:0000250|UniProtKB:G5E8K5}. Cell membrane, sarcolemma, T-tubule {ECO:0000250|UniProtKB:O70511}. Note=In skeletal muscle, localized at cos…	Cell membrane {ECO:0000269|PubMed:1309946, ECO:0000269|PubMed:19074138, ECO:0000269|PubMed:21447824, ECO:0000269|PubMed:23085483, ECO:0000269|PubMed:23420830, ECO:0000269|PubMed:25370050, ECO:0000269|PubMed:26279430}; Multi-pass membrane protein {ECO:0000250|UniProtKB:D0E0C2}. Cytoplasm, perinuclear region {ECO:0000269|PubMed:21447824}. Cell membrane, sarcolemma, T-tubule {ECO:0000250|UniProtKB:P…	protein-protein interactions	1	1	0	0	0	IPA	0	0	1	0	In skeletal muscle, required for costamere localization of DMD and betaDAG1 (By similarity). Membrane-cytoskeleton linker. May participate in the maintenance/targeting of ion channels and cell adhesion molecules at the nodes of Ranvier and axonal initial segments. Regulates KCNA1 channel activity in function of dietary Mg(2+) levels, and thereby contributes to the regulation of renal Mg(2+) reabs…	NA	1		Bipolar cells: 490.2;Excitatory neurons: 859.2;Inhibitory neurons: 881.3;Oligodendrocyte precursor cells: 592.6;Oligodendrocytes: 1579.5				This protein mediates the voltage-dependent sodium ion permeability of excitable membranes. Assuming opened or closed conformations in response to the voltage difference across the membrane, the protein forms a sodium-selective channel through which Na(+) ions may pass in accordance with their electrochemical gradient (PubMed:1309946, PubMed:21447824, PubMed:25370050, PubMed:23420830, PubMed:2308…	NA	1	heart muscle: 42.3	Cardiomyocytes: 77.1		amygdala: 3.1;basal ganglia: 10.1;hypothalamus: 6.0	basal ganglia: 5.4
ANK3	TNIK	Cytoplasm, cytoskeleton {ECO:0000269|PubMed:21223964}. Cell projection, axon {ECO:0000250|UniProtKB:O70511}. Cell membrane, sarcolemma {ECO:0000269|PubMed:21223964}. Cell junction, synapse, postsynaptic cell membrane {ECO:0000250|UniProtKB:O70511}. Lysosome {ECO:0000250|UniProtKB:G5E8K5}. Cell membrane, sarcolemma, T-tubule {ECO:0000250|UniProtKB:O70511}. Note=In skeletal muscle, localized at cos…	Nucleus. Cytoplasm. Recycling endosome. Cytoplasm, cytoskeleton. Note=Associated with recycling endosomes and the cytoskeletal fraction upon RAP2A overexpression.	protein-protein interactions	1	1	0	0	0	IPA	0	0	1	0	In skeletal muscle, required for costamere localization of DMD and betaDAG1 (By similarity). Membrane-cytoskeleton linker. May participate in the maintenance/targeting of ion channels and cell adhesion molecules at the nodes of Ranvier and axonal initial segments. Regulates KCNA1 channel activity in function of dietary Mg(2+) levels, and thereby contributes to the regulation of renal Mg(2+) reabs…	NA	1		Bipolar cells: 490.2;Excitatory neurons: 859.2;Inhibitory neurons: 881.3;Oligodendrocyte precursor cells: 592.6;Oligodendrocytes: 1579.5				Serine/threonine kinase that acts as an essential activator of the Wnt signaling pathway. Recruited to promoters of Wnt target genes and required to activate their expression. May act by phosphorylating TCF4/TCF7L2. Appears to act upstream of the JUN N-terminal pathway. May play a role in the response to environmental stress. Part of a signaling complex composed of NEDD4, RAP2A and TNIK which reg…	NA	1	brain: 36.1	Astrocytes: 1074.4;Excitatory neurons: 248.4;Inhibitory neurons: 360.8;Oligodendrocyte precursor cells: 374.5;Oligodendrocytes: 205.5
ANK3	ZDHHC17	Cytoplasm, cytoskeleton {ECO:0000269|PubMed:21223964}. Cell projection, axon {ECO:0000250|UniProtKB:O70511}. Cell membrane, sarcolemma {ECO:0000269|PubMed:21223964}. Cell junction, synapse, postsynaptic cell membrane {ECO:0000250|UniProtKB:O70511}. Lysosome {ECO:0000250|UniProtKB:G5E8K5}. Cell membrane, sarcolemma, T-tubule {ECO:0000250|UniProtKB:O70511}. Note=In skeletal muscle, localized at cos…	Golgi apparatus membrane {ECO:0000269|PubMed:15603740, ECO:0000269|PubMed:18794299}; Multi-pass membrane protein {ECO:0000255}. Cytoplasmic vesicle membrane {ECO:0000269|PubMed:18794299}; Multi-pass membrane protein {ECO:0000255}. Cell junction, synapse, presynaptic cell membrane {ECO:0000269|PubMed:18032660}; Multi-pass membrane protein {ECO:0000255}. Note=Low extracellular Mg(2+) induces increa…	protein-protein interactions	1	1	0	0	0	IPA	0	0	1	0	In skeletal muscle, required for costamere localization of DMD and betaDAG1 (By similarity). Membrane-cytoskeleton linker. May participate in the maintenance/targeting of ion channels and cell adhesion molecules at the nodes of Ranvier and axonal initial segments. Regulates KCNA1 channel activity in function of dietary Mg(2+) levels, and thereby contributes to the regulation of renal Mg(2+) reabs…	NA	1		Bipolar cells: 490.2;Excitatory neurons: 859.2;Inhibitory neurons: 881.3;Oligodendrocyte precursor cells: 592.6;Oligodendrocytes: 1579.5				Palmitoyltransferase that catalyzes the addition of palmitate onto various protein substrates and is involved in a variety of cellular processes. Has no stringent fatty acid selectivity and in addition to palmitate can also transfer onto target proteins myristate from tetradecanoyl-CoA and stearate from octadecanoyl-CoA (By similarity). Palmitoyltransferase specific for a subset of neuronal prote…	NA	1		Excitatory neurons: 102.2;Inhibitory neurons: 95.1;Oligodendrocytes: 115.8
ANKRD34C	DIO2	NA	Membrane {ECO:0000305}; Single-pass membrane protein {ECO:0000305}.	expression	1	0	0	0	0	IPA	0	0	1	1	NA	NA	1	brain: 4.9	Excitatory neurons: 3.0;Inhibitory neurons: 1.8				Responsible for the deiodination of T4 (3,5,3',5'-tetraiodothyronine) into T3 (3,5,3'-triiodothyronine). Essential for providing the brain with appropriate levels of T3 during the critical period of development.	NA	1	cervix: 165.3;thyroid gland: 359.0	Breast glandular cells: 150.7;Endometrial stromal cells: 158.3;Extravillous trophoblasts: 523.3;Muller glia cells: 246.4
AP3B2	MAPT	Cytoplasmic vesicle, clathrin-coated vesicle membrane {ECO:0000250}; Peripheral membrane protein {ECO:0000250}; Cytoplasmic side {ECO:0000250}. Golgi apparatus {ECO:0000250}. Note=Component of the coat surrounding the cytoplasmic face of coated vesicles located at the Golgi complex. {ECO:0000250}.	Cytoplasm, cytosol {ECO:0000269|PubMed:10747907, ECO:0000269|PubMed:23666762, ECO:0000269|PubMed:26014385}. Cell membrane {ECO:0000269|PubMed:10747907}; Peripheral membrane protein {ECO:0000269|PubMed:10747907}; Cytoplasmic side {ECO:0000269|PubMed:10747907}. Cytoplasm, cytoskeleton {ECO:0000269|PubMed:10747907}. Cell projection, axon {ECO:0000269|PubMed:10747907}. Cell projection, dendrite {ECO:…	expression	1	1	0	0	0	IPA	31268600	In Mus (mouse) neurons, transgenic mutant human TAU [MAPT] protein (p.K369I) decreases de novo synthesis of mouse Ap3b2 protein in mouse hemisphere. Experiment Type: proteomics	1	0	Subunit of non-clathrin- and clathrin-associated adaptor protein complex 3 (AP-3) that plays a role in protein sorting in the late-Golgi/trans-Golgi network (TGN) and/or endosomes. The AP complexes mediate both the recruitment of clathrin to membranes and the recognition of sorting signals within the cytosolic tails of transmembrane cargo molecules. AP-3 appears to be involved in the sorting of a…	NA	1	brain: 21.6;pituitary gland: 18.9;retina: 33.3	Cone photoreceptor cells: 27.1;Excitatory neurons: 61.7;Inhibitory neurons: 56.9;Oligodendrocyte precursor cells: 44.7;Oligodendrocytes: 22.8;Rod photoreceptor cells: 58.6				Promotes microtubule assembly and stability, and might be involved in the establishment and maintenance of neuronal polarity (PubMed:21985311). The C-terminus binds axonal microtubules while the N-terminus binds neural plasma membrane components, suggesting that tau functions as a linker protein between both (PubMed:21985311, PubMed:32961270). Axonal polarity is predetermined by TAU/MAPT localiza…	NA	1	brain: 68.5;skeletal muscle: 79.7	Astrocytes: 142.4;Bipolar cells: 314.4;Early spermatids: 199.9;Excitatory neurons: 189.2;Horizontal cells: 361.7;Inhibitory neurons: 153.7;Late spermatids: 416.6;Muller glia cells: 145.7;Oligodendrocytes: 163.8
AP3B2	MAPT	Cytoplasmic vesicle, clathrin-coated vesicle membrane {ECO:0000250}; Peripheral membrane protein {ECO:0000250}; Cytoplasmic side {ECO:0000250}. Golgi apparatus {ECO:0000250}. Note=Component of the coat surrounding the cytoplasmic face of coated vesicles located at the Golgi complex. {ECO:0000250}.	Cytoplasm, cytosol {ECO:0000269|PubMed:10747907, ECO:0000269|PubMed:23666762, ECO:0000269|PubMed:26014385}. Cell membrane {ECO:0000269|PubMed:10747907}; Peripheral membrane protein {ECO:0000269|PubMed:10747907}; Cytoplasmic side {ECO:0000269|PubMed:10747907}. Cytoplasm, cytoskeleton {ECO:0000269|PubMed:10747907}. Cell projection, axon {ECO:0000269|PubMed:10747907}. Cell projection, dendrite {ECO:…	protein-protein interactions	1	1	0	0	0	IPA	0	0	1	0	Subunit of non-clathrin- and clathrin-associated adaptor protein complex 3 (AP-3) that plays a role in protein sorting in the late-Golgi/trans-Golgi network (TGN) and/or endosomes. The AP complexes mediate both the recruitment of clathrin to membranes and the recognition of sorting signals within the cytosolic tails of transmembrane cargo molecules. AP-3 appears to be involved in the sorting of a…	NA	1	brain: 21.6;pituitary gland: 18.9;retina: 33.3	Cone photoreceptor cells: 27.1;Excitatory neurons: 61.7;Inhibitory neurons: 56.9;Oligodendrocyte precursor cells: 44.7;Oligodendrocytes: 22.8;Rod photoreceptor cells: 58.6				Promotes microtubule assembly and stability, and might be involved in the establishment and maintenance of neuronal polarity (PubMed:21985311). The C-terminus binds axonal microtubules while the N-terminus binds neural plasma membrane components, suggesting that tau functions as a linker protein between both (PubMed:21985311, PubMed:32961270). Axonal polarity is predetermined by TAU/MAPT localiza…	NA	1	brain: 68.5;skeletal muscle: 79.7	Astrocytes: 142.4;Bipolar cells: 314.4;Early spermatids: 199.9;Excitatory neurons: 189.2;Horizontal cells: 361.7;Inhibitory neurons: 153.7;Late spermatids: 416.6;Muller glia cells: 145.7;Oligodendrocytes: 163.8
AP3B2	PREX1	Cytoplasmic vesicle, clathrin-coated vesicle membrane {ECO:0000250}; Peripheral membrane protein {ECO:0000250}; Cytoplasmic side {ECO:0000250}. Golgi apparatus {ECO:0000250}. Note=Component of the coat surrounding the cytoplasmic face of coated vesicles located at the Golgi complex. {ECO:0000250}.	Cytoplasm, cytosol. Cell membrane. Note=Mainly cytosolic. Some amount is apparently associated to the plasma membrane.	protein-protein interactions	1	1	0	0	0	IPA	0	0	1	0	Subunit of non-clathrin- and clathrin-associated adaptor protein complex 3 (AP-3) that plays a role in protein sorting in the late-Golgi/trans-Golgi network (TGN) and/or endosomes. The AP complexes mediate both the recruitment of clathrin to membranes and the recognition of sorting signals within the cytosolic tails of transmembrane cargo molecules. AP-3 appears to be involved in the sorting of a…	NA	1	brain: 21.6;pituitary gland: 18.9;retina: 33.3	Cone photoreceptor cells: 27.1;Excitatory neurons: 61.7;Inhibitory neurons: 56.9;Oligodendrocyte precursor cells: 44.7;Oligodendrocytes: 22.8;Rod photoreceptor cells: 58.6				Functions as a RAC guanine nucleotide exchange factor (GEF), which activates the Rac proteins by exchanging bound GDP for free GTP. Its activity is synergistically activated by phosphatidylinositol 3,4,5-trisphosphate and the beta gamma subunits of heterotrimeric G protein. May function downstream of heterotrimeric G proteins in neutrophils.	NA	1	bone marrow: 53.0;brain: 75.0	Astrocytes: 87.1;dendritic cells: 84.0;Kupffer cells: 104.7;Macrophages: 76.5;Microglial cells: 95.5;NK-cells: 90.6;Oligodendrocytes: 190.2
AP3B2	SLC6A4	Cytoplasmic vesicle, clathrin-coated vesicle membrane {ECO:0000250}; Peripheral membrane protein {ECO:0000250}; Cytoplasmic side {ECO:0000250}. Golgi apparatus {ECO:0000250}. Note=Component of the coat surrounding the cytoplasmic face of coated vesicles located at the Golgi complex. {ECO:0000250}.	Cell membrane {ECO:0000269|PubMed:16870614, ECO:0000269|PubMed:17506858, ECO:0000269|PubMed:27049939}; Multi-pass membrane protein {ECO:0000250|UniProtKB:Q7K4Y6, ECO:0000269|PubMed:27049939}. Endomembrane system {ECO:0000269|PubMed:16870614}; Multi-pass membrane protein {ECO:0000255}. Endosome membrane {ECO:0000269|PubMed:16870614}; Multi-pass membrane protein {ECO:0000255}. Cell junction, synaps…	protein-protein interactions	1	1	0	0	0	IPA	32581705	Binding of mouse Ap3b2 protein and mouse Slc6a4 protein occurs. Experiment Type: affinity chromatography	1	0	Subunit of non-clathrin- and clathrin-associated adaptor protein complex 3 (AP-3) that plays a role in protein sorting in the late-Golgi/trans-Golgi network (TGN) and/or endosomes. The AP complexes mediate both the recruitment of clathrin to membranes and the recognition of sorting signals within the cytosolic tails of transmembrane cargo molecules. AP-3 appears to be involved in the sorting of a…	NA	1	brain: 21.6;pituitary gland: 18.9;retina: 33.3	Cone photoreceptor cells: 27.1;Excitatory neurons: 61.7;Inhibitory neurons: 56.9;Oligodendrocyte precursor cells: 44.7;Oligodendrocytes: 22.8;Rod photoreceptor cells: 58.6				Serotonin transporter whose primary function in the central nervous system involves the regulation of serotonergic signaling via transport of serotonin molecules from the synaptic cleft back into the pre-synaptic terminal for re-utilization. Plays a key role in mediating regulation of the availability of serotonin to other receptors of serotonergic systems. Terminates the action of serotonin and …	NA	1	brain: 82.4;intestine: 40.7;lung: 29.1	Cytotrophoblasts: 125.4;Proximal enterocytes: 100.9;Syncytiotrophoblasts: 106.4	midbrain: 82.4	midbrain: 58.4	midbrain: 38.9;pons: 29.1
AP3B2	VAMP7	Cytoplasmic vesicle, clathrin-coated vesicle membrane {ECO:0000250}; Peripheral membrane protein {ECO:0000250}; Cytoplasmic side {ECO:0000250}. Golgi apparatus {ECO:0000250}. Note=Component of the coat surrounding the cytoplasmic face of coated vesicles located at the Golgi complex. {ECO:0000250}.	Cytoplasmic vesicle, secretory vesicle membrane {ECO:0000250}; Single-pass type IV membrane protein {ECO:0000250}. Golgi apparatus, trans-Golgi network membrane {ECO:0000250}; Single-pass type IV membrane protein {ECO:0000250}. Late endosome membrane {ECO:0000250}; Single-pass type IV membrane protein {ECO:0000250}. Lysosome membrane {ECO:0000269|PubMed:17897319}; Single-pass type IV membrane pro…	localization	0	1	GA	N	1	IPA	19144828	Mutation of mouse Ap3b2 gene to homozygous mutant mouse Ap3b2 gene (knockout) in mouse decreases localization of mouse Vamp7 protein to freshly isolated synaptic vesicle fractions from mouse brain. Experiment Type: Western blotting	1	0	Subunit of non-clathrin- and clathrin-associated adaptor protein complex 3 (AP-3) that plays a role in protein sorting in the late-Golgi/trans-Golgi network (TGN) and/or endosomes. The AP complexes mediate both the recruitment of clathrin to membranes and the recognition of sorting signals within the cytosolic tails of transmembrane cargo molecules. AP-3 appears to be involved in the sorting of a…	NA	1	brain: 21.6;pituitary gland: 18.9;retina: 33.3	Cone photoreceptor cells: 27.1;Excitatory neurons: 61.7;Inhibitory neurons: 56.9;Oligodendrocyte precursor cells: 44.7;Oligodendrocytes: 22.8;Rod photoreceptor cells: 58.6				Involved in the targeting and/or fusion of transport vesicles to their target membrane during transport of proteins from the early endosome to the lysosome. Required for heterotypic fusion of late endosomes with lysosomes and homotypic lysosomal fusion. Required for calcium regulated lysosomal exocytosis. Involved in the export of chylomicrons from the endoplasmic reticulum to the cis Golgi. Requ…	NA	1
APOM	ABCG8	Secreted {ECO:0000269|PubMed:17525477, ECO:0000269|PubMed:18279674, ECO:0000269|PubMed:18460466}. Note=Present in high density lipoprotein (HDL) and to a lesser extent in triglyceride-rich lipoproteins (TGRLP) and low density lipoproteins (LDL).	Cell membrane {ECO:0000305|PubMed:16893193}; Multi-pass membrane protein {ECO:0000269|PubMed:27144356}. Apical cell membrane {ECO:0000269|PubMed:14504269}; Multi-pass membrane protein {ECO:0000269|PubMed:27144356}.	localization	1	1	S/CM	N	1	IPA	32918529	In Mus (mouse) liver, human ABCG5 protein and human ABCG8 protein increase localization of mouse Apom protein to Mus (mouse) plasma.	1	0	Probably involved in lipid transport. Can bind sphingosine-1-phosphate, myristic acid, palmitic acid and stearic acid, retinol, all-trans-retinoic acid and 9-cis-retinoic acid. {ECO:0000269|PubMed:17525477, ECO:0000269|PubMed:19733574}.	NA	1	liver: 393.9	Hepatocytes: 665.9;Proximal tubular cells: 681.1				ABCG5 and ABCG8 form an obligate heterodimer that mediates Mg(2+)- and ATP-dependent sterol transport across the cell membrane. Plays an essential role in the selective transport of the dietary cholesterol in and out of the enterocytes and in the selective sterol excretion by the liver into bile (PubMed:11099417, PubMed:11452359, PubMed:27144356, PubMed:15054092). Required for normal sterol homeo…	Mg(2+); Xref=ChEBI:CHEBI:18420; Evidence={ECO:0000250|UniProtKB:Q9DBM0};	1	intestine: 31.7;liver: 63.9	Hepatocytes: 32.0;Proximal enterocytes: 13.8
APOM	FN1	Secreted {ECO:0000269|PubMed:17525477, ECO:0000269|PubMed:18279674, ECO:0000269|PubMed:18460466}. Note=Present in high density lipoprotein (HDL) and to a lesser extent in triglyceride-rich lipoproteins (TGRLP) and low density lipoproteins (LDL).	Secreted, extracellular space, extracellular matrix {ECO:0000305|PubMed:29100092}.	expression	0	1	S	N	1	IPA	30629456	VPC 23019 increases expression of human FN1 mRNA in HK-2 cells that is decreased by a molecular complex consisting of APOM and of S1P [sphingosine-1-phosphate]. APOM can bind sphingosine-1-phosphate, myristic acid, palmitic acid and stearic acid, retinol, all-trans-retinoic acid and 9-cis-retinoic acid.	1	1	Probably involved in lipid transport. Can bind sphingosine-1-phosphate, myristic acid, palmitic acid and stearic acid, retinol, all-trans-retinoic acid and 9-cis-retinoic acid. {ECO:0000269|PubMed:17525477, ECO:0000269|PubMed:19733574}.	NA	1	liver: 393.9	Hepatocytes: 665.9;Proximal tubular cells: 681.1				Fibronectins bind cell surfaces and various compounds including collagen, fibrin, heparin, DNA, and actin (PubMed:3024962, PubMed:3900070, PubMed:3593230, PubMed:7989369). Fibronectins are involved in cell adhesion, cell motility, opsonization, wound healing, and maintenance of cell shape (PubMed:3024962, PubMed:3900070, PubMed:3593230, PubMed:7989369). Involved in osteoblast compaction through t…	NA	1	liver: 1740.1;placenta: 2952.1	Extravillous trophoblasts: 2583.6;Fibroblasts: 562.6;Hepatocytes: 1012.4;Smooth muscle cells: 450.2
APOM	PA (palmitic acid)	Secreted {ECO:0000269|PubMed:17525477, ECO:0000269|PubMed:18279674, ECO:0000269|PubMed:18460466}. Note=Present in high density lipoprotein (HDL) and to a lesser extent in triglyceride-rich lipoproteins (TGRLP) and low density lipoproteins (LDL).	NA	expression	1	1	S	N, presynaptic	1	IPA	24508264	Palmitic acid decreases expression of APOM mRNA. (Original Sentence: In the present study, we demonstrated that palmitic acid could significantly inhibit APOM gene expression in HepG2 cells.)	1	0	Probably involved in lipid transport. Can bind sphingosine-1-phosphate, myristic acid, palmitic acid and stearic acid, retinol, all-trans-retinoic acid and 9-cis-retinoic acid. {ECO:0000269|PubMed:17525477, ECO:0000269|PubMed:19733574}.	NA	1	liver: 393.9	Hepatocytes: 665.9;Proximal tubular cells: 681.1				NA	NA	NA	NA	NA	NA	NA	NA
AQP5	EGFR	Apical cell membrane {ECO:0000269|PubMed:23473857}; Multi-pass membrane protein {ECO:0000269|PubMed:18768791, ECO:0000269|PubMed:26569106}. Cell membrane {ECO:0000269|PubMed:23830519, ECO:0000269|PubMed:26569106, ECO:0000269|PubMed:8621489}; Multi-pass membrane protein {ECO:0000269|PubMed:18768791, ECO:0000269|PubMed:26569106}. Cytoplasmic vesicle membrane {ECO:0000269|PubMed:26569106}; Multi-pas…	Cell membrane {ECO:0000269|PubMed:17182860, ECO:0000269|PubMed:20462955, ECO:0000269|PubMed:23589287, ECO:0000269|PubMed:27153536, ECO:0000269|PubMed:2790960}; Single-pass type I membrane protein {ECO:0000269|PubMed:27153536}. Endoplasmic reticulum membrane {ECO:0000269|PubMed:27153536}; Single-pass type I membrane protein. Golgi apparatus membrane; Single-pass type I membrane protein. Nucleus me…	activation	0	1	CM	0	0	IPA	20455256	Overexpression of AQP5 protein is involved in activation of epidermal growth factor receptor [EGFR]. (Original Sentence: AQP5 overexpression resulted in enhanced activation of the epidermal growth factor receptor (EGFR), extracellular receptor kinase (ERK1/2), and p38 mitogen-activated protein kinase (p38 MAPK) pathway in cancer cells.)	1	0	Forms a water-specific channel (PubMed:8621489, PubMed:18768791). Plays an important role in fluid secretion in salivary glands (By similarity). Required for TRPV4 activation by hypotonicity. Together with TRPV4, controls regulatory volume decrease in salivary epithelial cells (PubMed:16571723). Seems to play a redundant role in water transport in the eye, lung and in sweat glands (By similarity)…	NA	1	salivary gland: 628.0;testis: 223.8	Early spermatids: 1542.9;Late spermatids: 4265.6				Receptor tyrosine kinase binding ligands of the EGF family and activating several signaling cascades to convert extracellular cues into appropriate cellular responses (PubMed:2790960, PubMed:10805725, PubMed:27153536). Known ligands include EGF, TGFA/TGF-alpha, AREG, epigen/EPGN, BTC/betacellulin, epiregulin/EREG and HBEGF/heparin-binding EGF (PubMed:2790960, PubMed:7679104, PubMed:8144591, PubMe…	NA	1	placenta: 68.5	Cytotrophoblasts: 287.9;Skeletal myocytes: 251.2;Syncytiotrophoblasts: 376.8
AQP5	EP300	Apical cell membrane {ECO:0000269|PubMed:23473857}; Multi-pass membrane protein {ECO:0000269|PubMed:18768791, ECO:0000269|PubMed:26569106}. Cell membrane {ECO:0000269|PubMed:23830519, ECO:0000269|PubMed:26569106, ECO:0000269|PubMed:8621489}; Multi-pass membrane protein {ECO:0000269|PubMed:18768791, ECO:0000269|PubMed:26569106}. Cytoplasmic vesicle membrane {ECO:0000269|PubMed:26569106}; Multi-pas…	Cytoplasm {ECO:0000269|PubMed:12929931, ECO:0000269|PubMed:20940255}. Nucleus {ECO:0000269|PubMed:12929931, ECO:0000269|PubMed:14645221, ECO:0000269|PubMed:16219772, ECO:0000269|PubMed:16574662, ECO:0000269|PubMed:17761950, ECO:0000269|PubMed:20940255}. Chromosome {ECO:0000269|PubMed:14645221, ECO:0000269|PubMed:25818647}. Note=Localizes to active chromatin: Colocalizes with histone H3 acetylated…	transcription	1	1	CM/C	0	0	IPA	26833564	P300 [EP300] protein increases transcriptional activation of DNA endogenous promoter from rat Aqp5 gene in MLE-15 cells. Experiment Type: luciferase reporter gene assay	1	1	Forms a water-specific channel (PubMed:8621489, PubMed:18768791). Plays an important role in fluid secretion in salivary glands (By similarity). Required for TRPV4 activation by hypotonicity. Together with TRPV4, controls regulatory volume decrease in salivary epithelial cells (PubMed:16571723). Seems to play a redundant role in water transport in the eye, lung and in sweat glands (By similarity)…	NA	1	salivary gland: 628.0;testis: 223.8	Early spermatids: 1542.9;Late spermatids: 4265.6				Functions as histone acetyltransferase and regulates transcription via chromatin remodeling (PubMed:23415232, PubMed:23934153, PubMed:8945521). Acetylates all four core histones in nucleosomes. Histone acetylation gives an epigenetic tag for transcriptional activation (PubMed:23415232, PubMed:23934153, PubMed:8945521). Mediates cAMP-gene regulation by binding specifically to phosphorylated CREB p…	NA	1
AQP5	NOTCH2NLA	Apical cell membrane {ECO:0000269|PubMed:23473857}; Multi-pass membrane protein {ECO:0000269|PubMed:18768791, ECO:0000269|PubMed:26569106}. Cell membrane {ECO:0000269|PubMed:23830519, ECO:0000269|PubMed:26569106, ECO:0000269|PubMed:8621489}; Multi-pass membrane protein {ECO:0000269|PubMed:18768791, ECO:0000269|PubMed:26569106}. Cytoplasmic vesicle membrane {ECO:0000269|PubMed:26569106}; Multi-pas…	Secreted {ECO:0000269|PubMed:14673143, ECO:0000269|PubMed:29856954}. Cytoplasm {ECO:0000269|PubMed:14673143}.	protein-protein interactions	1	1	CM/S	0	0	IPA	25416956	Binding of human AQP5 protein and human NOTCH2NLA protein occurs. Experiment Type: two-hybrid array	1	0	Forms a water-specific channel (PubMed:8621489, PubMed:18768791). Plays an important role in fluid secretion in salivary glands (By similarity). Required for TRPV4 activation by hypotonicity. Together with TRPV4, controls regulatory volume decrease in salivary epithelial cells (PubMed:16571723). Seems to play a redundant role in water transport in the eye, lung and in sweat glands (By similarity)…	NA	1	salivary gland: 628.0;testis: 223.8	Early spermatids: 1542.9;Late spermatids: 4265.6				Human-specific protein that promotes neural progenitor proliferation and evolutionary expansion of the brain neocortex by regulating the Notch signaling pathway (PubMed:29856954, PubMed:29856955, PubMed:29561261). Able to promote neural progenitor self-renewal, possibly by down-regulating neuronal differentiation genes, thereby delaying the differentiation of neuronal progenitors and leading to a…	NA	1		B-cells: 1.6;dendritic cells: 2.8;Extravillous trophoblasts: 2.0;Fibroblasts: 1.2;Hofbauer cells: 2.1;Macrophages: 2.2;Plasma cells: 3.0;Smooth muscle cells: 1.4;Syncytiotrophoblasts: 1.0
AA (arachidonic acid)	CASP8	NA	Cytoplasm {ECO:0000250|UniProtKB:Q9JHX4}. Nucleus {ECO:0000250|UniProtKB:Q9JHX4}.	activation	0	1	C	N	1	IPA	23405167	Arachidonic acid (50 mcM) and oleic acid (50 mcM) decrease activation of human CASP8 protein in NB100 cells that is increased by palmitic acid (150 mcM). Experiment Type: caspase activity assay	0	0	NA	NA	NA	NA	NA	NA	NA	NA	Thiol protease that plays a key role in programmed cell death by acting as a molecular switch for apoptosis, necroptosis and pyroptosis, and is required to prevent tissue damage during embryonic development and adulthood (By similarity). Initiator protease that induces extrinsic apoptosis by mediating cleavage and activation of effector caspases responsible for the TNFRSF6/FAS mediated and TNFRSF…	NA	1	bone marrow: 67.2	dendritic cells: 107.4;NK-cells: 132.8;Plasma cells: 73.4;T-cells: 86.9
AA (arachidonic acid)	CLCN2	NA	Cell membrane {ECO:0000269|PubMed:29403011}; Multi-pass membrane protein.	activation	0	1	C/CM	N	1	IPA	10898715	Arachidonic acid increases activation of human recombinant ClC-2 chloride channels [CLCN2].	0	1	NA	NA	NA	NA	NA	NA	NA	NA	Voltage-gated chloride channel. Chloride channels have several functions including the regulation of cell volume, membrane potential stabilization, signal transduction and transepithelial transport. Involved in the regulation of aldosterone production. The opening of CLCN2 channels at hyperpolarized membrane potentials in the glomerulosa causes cell membrane depolarization, activation of voltage-…	NA	1	intestine: 16.4	Distal enterocytes: 81.7;Proximal enterocytes: 27.4;Theca cells: 62.5
AA (arachidonic acid)	DAGLA	NA	Cell membrane {ECO:0000269|PubMed:27595600}; Multi-pass membrane protein {ECO:0000255}. Cell junction, synapse, postsynaptic density membrane {ECO:0000269|PubMed:27595600}; Multi-pass membrane protein {ECO:0000255}. Early endosome membrane {ECO:0000269|PubMed:27595600}; Multi-pass membrane protein {ECO:0000255}. Cell projection, dendritic spine membrane {ECO:0000250|UniProtKB:Q6WQJ1}; Multi-pass …	expression	1	1	C/CM	A	1	IPA	14610053;17584991;20147530;30481531;21537474	Human DAGLA is involved in metabolism of arachidonic acid.; Mouse Dagla is involved in metabolism of arachidonic acid.;Homozygous mutant mouse Dagla gene (knockout) in mouse decreases quantity of arachidonic acid in mouse brain. Experiment Type: liquid-chromatography mass spectrometry.; In cytoplasm from astrocytes, DAGLA protein increases production of AA [arachidonic acid].; In cytoplasm from a…	0	0	NA	NA	NA	NA	NA	NA	NA	NA	Serine hydrolase that hydrolyzes arachidonic acid-esterified diacylglycerols (DAGs) to produce the principal endocannabinoid, 2-arachidonoylglycerol (2-AG) (PubMed:14610053, PubMed:26668358, PubMed:23502535). Preferentially hydrolyzes sn-1 fatty acids from diacylglycerols (DAG) that contain arachidonic acid (AA) esterified at the sn-2 position to biosynthesize 2-AG (PubMed:14610053, PubMed:266683…	Ca(2+); Xref=ChEBI:CHEBI:29108; Evidence={ECO:0000269|PubMed:14610053};	1	brain: 11.7	Astrocytes: 12.7;Excitatory neurons: 14.8
AA (arachidonic acid)	DRD2	NA	Cell membrane {ECO:0000269|PubMed:21645528, ECO:0000269|PubMed:26535572}; Multi-pass membrane protein {ECO:0000255}. Golgi apparatus membrane {ECO:0000269|PubMed:26535572}; Multi-pass membrane protein {ECO:0000255}.	localization	1	1	S/CM	N, presynaptic	1	IPA	1650470	Stimulation of D2r [DRD2] protein increases release of arachidonate [arachidonic acid] from Cho cells that is increased by ATP [adenosine triphosphate].	0	0	NA	NA	NA	NA	NA	NA	NA	NA	Dopamine receptor whose activity is mediated by G proteins which inhibit adenylyl cyclase (PubMed:21645528). Positively regulates postnatal regression of retinal hyaloid vessels via suppression of VEGFR2/KDR activity, downstream of OPN5 (By similarity). {ECO:0000250|UniProtKB:P61168, ECO:0000269|PubMed:21645528}.	NA	1	brain: 64.1;pituitary gland: 60.0	Horizontal cells: 60.6	basal ganglia: 64.1	basal ganglia: 205.3	basal ganglia: 146.3
AA (arachidonic acid)	EGFR	NA	Cell membrane {ECO:0000269|PubMed:17182860, ECO:0000269|PubMed:20462955, ECO:0000269|PubMed:23589287, ECO:0000269|PubMed:27153536, ECO:0000269|PubMed:2790960}; Single-pass type I membrane protein {ECO:0000269|PubMed:27153536}. Endoplasmic reticulum membrane {ECO:0000269|PubMed:27153536}; Single-pass type I membrane protein. Golgi apparatus membrane; Single-pass type I membrane protein. Nucleus me…	transcription	0	1	C/CM	N, presynaptic	1	IPA	15525798	5,8,11,14-eicosatetraynoic acid decreases transactivation of rat Egfr gene that is increased by arachidonic acid.	0	0	NA	NA	NA	NA	NA	NA	NA	NA	Receptor tyrosine kinase binding ligands of the EGF family and activating several signaling cascades to convert extracellular cues into appropriate cellular responses (PubMed:2790960, PubMed:10805725, PubMed:27153536). Known ligands include EGF, TGFA/TGF-alpha, AREG, epigen/EPGN, BTC/betacellulin, epiregulin/EREG and HBEGF/heparin-binding EGF (PubMed:2790960, PubMed:7679104, PubMed:8144591, PubMe…	NA	1	placenta: 68.5	Cytotrophoblasts: 287.9;Skeletal myocytes: 251.2;Syncytiotrophoblasts: 376.8
AA (arachidonic acid)	FABP3	NA	Cytoplasm.	metabolite-protein interacton		1	C	N	1	IPA	12479567	Fabp3 is expressed in mature neurons in the dentate gyrus (our unpublished results) and reported to have a substantial affinity to ARA. FABR3 is expressed postsynaptically (PMID 33604770).	0	0	NA	NA	NA	NA	NA	NA	NA	NA	FABP are thought to play a role in the intracellular transport of long-chain fatty acids and their acyl-CoA esters. FABR3 is DEE and AS (p<0.05) in TS blood.	NA	1	heart muscle: 4497.7;skeletal muscle: 2220.7;tongue: 1455.2	Breast glandular cells: 629.8;Cardiomyocytes: 2495.2;Distal tubular cells: 452.0;Proximal tubular cells: 703.6
AA (arachidonic acid)	GRIN1	NA	Cell membrane {ECO:0000269|PubMed:26875626, ECO:0000269|PubMed:26919761, ECO:0000269|PubMed:28105280, ECO:0000269|PubMed:28126851, ECO:0000269|PubMed:7685113}; Multi-pass membrane protein {ECO:0000250}. Cell junction, synapse, postsynaptic cell membrane {ECO:0000250}. Cell junction, synapse, postsynaptic density {ECO:0000250}. Note=Enriched in postsynaptic plasma membrane and postsynaptic densiti…	activation		1	C/CM	N	1	IPA	2847054	We report here that glutamate and NMDA, acting at typical NMDA receptors, stimulate the release of arachidonic acid from striatal neurons probably by stimulation of a Ca2+-dependent phospholipase A2. ARACHIDONIC acid is released by phospholipase A2 when activation of N-methyl-D-aspartate (NMDA) receptors by neurotransmitter glutamate raises the calcium concentration in neurons.	0	0	NA	NA	NA	NA	NA	NA	NA	NA	Component of NMDA receptor complexes that function as heterotetrameric, ligand-gated ion channels with high calcium permeability and voltage-dependent sensitivity to magnesium. Channel activation requires binding of the neurotransmitter glutamate to the epsilon subunit, glycine binding to the zeta subunit, plus membrane depolarization to eliminate channel inhibition by Mg(2+) (PubMed:7685113, Pub…	NA	1	brain: 196.5	Excitatory neurons: 132.6;Inhibitory neurons: 134.4
AA (arachidonic acid)	GRIN1	NA	Cell membrane {ECO:0000269|PubMed:26875626, ECO:0000269|PubMed:26919761, ECO:0000269|PubMed:28105280, ECO:0000269|PubMed:28126851, ECO:0000269|PubMed:7685113}; Multi-pass membrane protein {ECO:0000250}. Cell junction, synapse, postsynaptic cell membrane {ECO:0000250}. Cell junction, synapse, postsynaptic density {ECO:0000250}. Note=Enriched in postsynaptic plasma membrane and postsynaptic densiti…	activation		1	S/CM	N	1	IPA	1371330	Arachidonic acid potentiates, and makes more transient, the current through NMDA receptor channels, and slightly reduces the current through non-NMDA receptor channels. Potentiation of the NMDA receptor current results from an increase in channel open probability, with no change in open channel current. We observe potentiation even with saturating levels of agonist at the glutamate- and glycine-b…	0	0	NA	NA	NA	NA	NA	NA	NA	NA	Component of NMDA receptor complexes that function as heterotetrameric, ligand-gated ion channels with high calcium permeability and voltage-dependent sensitivity to magnesium. Channel activation requires binding of the neurotransmitter glutamate to the epsilon subunit, glycine binding to the zeta subunit, plus membrane depolarization to eliminate channel inhibition by Mg(2+) (PubMed:7685113, Pub…	NA	1	brain: 196.5	Excitatory neurons: 132.6;Inhibitory neurons: 134.4	cerebral cortex: 196.5
AA (arachidonic acid)	GRIN2A	NA	Cell projection, dendritic spine {ECO:0000250|UniProtKB:Q00959}. Cell membrane {ECO:0000269|PubMed:26875626, ECO:0000269|PubMed:26919761, ECO:0000269|PubMed:28105280, ECO:0000269|PubMed:8768735}; Multi-pass membrane protein {ECO:0000305}. Cell junction, synapse {ECO:0000250|UniProtKB:P35436}. Cell junction, synapse, postsynaptic cell membrane {ECO:0000250|UniProtKB:Q00959}; Multi-pass membrane pr…	activation		1	S/CM	N	1	IPA	21957234	In dissociated-cultured mouse cortical neurons, stimulation of mouse Nmda receptor protein(s) in extrasynaptic region from mouse dissociated-cultured cortical neurons increases quantity of arachidonic acid. Experiment Type: liquid chromatography electrospray ionization mass spectrometry	0	0	NA	NA	NA	NA	NA	NA	NA	NA	Component of NMDA receptor complexes that function as heterotetrameric, ligand-gated ion channels with high calcium permeability and voltage-dependent sensitivity to magnesium. Channel activation requires binding of the neurotransmitter glutamate to the epsilon subunit, glycine binding to the zeta subunit, plus membrane depolarization to eliminate channel inhibition by Mg(2+) (PubMed:8768735, Pub…	NA	1	brain: 29.2	Excitatory neurons: 839.8;Inhibitory neurons: 904.7	cerebral cortex: 196.5
AA (arachidonic acid)	GRIN2B	NA	Cell membrane {ECO:0000269|PubMed:26875626, ECO:0000269|PubMed:26919761, ECO:0000269|PubMed:28126851, ECO:0000269|PubMed:8768735}; Multi-pass membrane protein {ECO:0000250|UniProtKB:Q00960}. Cell junction, synapse, postsynaptic cell membrane {ECO:0000250|UniProtKB:Q00960}; Multi-pass membrane protein {ECO:0000250|UniProtKB:Q00960}. Late endosome {ECO:0000250|UniProtKB:Q01097}. Lysosome {ECO:00002…	activation		1	S/CM	N	1	IPA	2847054	We report here that glutamate and NMDA, acting at typical NMDA receptors, stimulate the release of arachidonic acid from striatal neurons probably by stimulation of a Ca2+-dependent phospholipase A2. ARACHIDONIC acid is released by phospholipase A2 when activation of N-methyl-D-aspartate (NMDA) receptors by neurotransmitter glutamate raises the calcium concentration in neurons.	0	0	NA	NA	NA	NA	NA	NA	NA	NA	Component of NMDA receptor complexes that function as heterotetrameric, ligand-gated ion channels with high calcium permeability and voltage-dependent sensitivity to magnesium. Channel activation requires binding of the neurotransmitter glutamate to the epsilon subunit, glycine binding to the zeta subunit, plus membrane depolarization to eliminate channel inhibition by Mg(2+) (PubMed:8768735, Pub…	NA	1	brain: 38.3	Excitatory neurons: 625.2;Inhibitory neurons: 882.5
AA (arachidonic acid)	GRIN3A	NA	Cell membrane {ECO:0000250|UniProtKB:Q9R1M7}; Multi-pass membrane protein {ECO:0000250}. Cell junction, synapse, postsynaptic cell membrane {ECO:0000250}. Cell junction, synapse, postsynaptic density {ECO:0000250}. Note=Enriched in postsynaptic plasma membrane and postsynaptic densities. Requires the presence of GRIN1 to be targeted at the plasma membrane (By similarity). {ECO:0000250}.	activation		1	S/CM	N	1	IPA	2847054	We report here that glutamate and NMDA, acting at typical NMDA receptors, stimulate the release of arachidonic acid from striatal neurons probably by stimulation of a Ca2+-dependent phospholipase A2. ARACHIDONIC acid is released by phospholipase A2 when activation of N-methyl-D-aspartate (NMDA) receptors by neurotransmitter glutamate raises the calcium concentration in neurons.	0	0	NA	NA	NA	NA	NA	NA	NA	NA	NMDA receptor subtype of glutamate-gated ion channels with reduced single-channel conductance, low calcium permeability and low voltage-dependent sensitivity to magnesium. Mediated by glycine. During the development of neural circuits, plays a role in the synaptic refinement period, restricting spine maturation and growth. By competing with GIT1 interaction with ARHGEF7/beta-PIX, may reduce GIT1/…	NA	1	brain: 4.3	Inhibitory neurons: 220.7
AA (arachidonic acid)	IL17A	NA	NA	expression		1	S	N	1	IPA	26828067	Arachidonic acid decreases production of mouse Il17a protein in cultured lamina propria lymphocytes from mouse exhibiting DSS-induced colitis. Experiment Type: ELISA	0	0	NA	NA	NA	NA	NA	NA	NA	NA	Effector cytokine of innate and adaptive immune system involved in antimicrobial host defense and maintenance of tissue integrity (PubMed:24120361). Signals via IL17RA-IL17RC heterodimeric receptor complex, triggering homotypic interaction of IL17RA and IL17RC chains with TRAF3IP2 adapter. This leads to downstream TRAF6-mediated activation of NF-kappa-B and MAPkinase pathways ultimately resulting…	NA	NA	lymphoid tissue: 1.4	T-cells: 8.7
AA (arachidonic acid)	MAPK3	NA	Cytoplasm {ECO:0000250|UniProtKB:P21708}. Nucleus. Membrane, caveola {ECO:0000250|UniProtKB:P21708}. Cell junction, focal adhesion {ECO:0000250|UniProtKB:Q63844}. Note=Autophosphorylation at Thr-207 promotes nuclear localization (PubMed:19060905). PEA15-binding redirects the biological outcome of MAPK3 kinase-signaling by sequestering MAPK3 into the cytoplasm (By similarity). {ECO:0000250|UniProt…	localization	1	1	C/S	N, presynaptic	1	IPA	21236359	Inhibition of active p44 [MAPK3] decreases release of AA [arachidonic acid]. (Original Sentence: Inhibition of p44/p42 mitogen-activated protein kinase partially decreased the AA release, but did not affect degranulation.)	0	0	NA	NA	NA	NA	NA	NA	NA	NA	Serine/threonine kinase which acts as an essential component of the MAP kinase signal transduction pathway. MAPK1/ERK2 and MAPK3/ERK1 are the 2 MAPKs which play an important role in the MAPK/ERK cascade. They participate also in a signaling cascade initiated by activated KIT and KITLG/SCF. Depending on the cellular context, the MAPK/ERK cascade mediates diverse biological functions such as cell g…	Mg(2+); Xref=ChEBI:CHEBI:18420; Evidence={ECO:0000250};	1		Distal enterocytes: 336.9;Early spermatids: 267.2;Proximal enterocytes: 235.6
AA (arachidonic acid)	MAPK3	NA	Cytoplasm {ECO:0000250|UniProtKB:P21708}. Nucleus. Membrane, caveola {ECO:0000250|UniProtKB:P21708}. Cell junction, focal adhesion {ECO:0000250|UniProtKB:Q63844}. Note=Autophosphorylation at Thr-207 promotes nuclear localization (PubMed:19060905). PEA15-binding redirects the biological outcome of MAPK3 kinase-signaling by sequestering MAPK3 into the cytoplasm (By similarity). {ECO:0000250|UniProt…	activation	0	1	C	N, presynaptic	1	IPA	10753939;12923227	Arachidonic acid increases activation of human ERK1 [MAPK3] protein.; In 3T3-L1 cells, arachidonic acid increases the duration of activation of mouse Erk1 [Mapk3] protein. Experiment Type: immunoblot	0	0	NA	NA	NA	NA	NA	NA	NA	NA	Serine/threonine kinase which acts as an essential component of the MAP kinase signal transduction pathway. MAPK1/ERK2 and MAPK3/ERK1 are the 2 MAPKs which play an important role in the MAPK/ERK cascade. They participate also in a signaling cascade initiated by activated KIT and KITLG/SCF. Depending on the cellular context, the MAPK/ERK cascade mediates diverse biological functions such as cell g…	Mg(2+); Xref=ChEBI:CHEBI:18420; Evidence={ECO:0000250};	1		Distal enterocytes: 336.9;Early spermatids: 267.2;Proximal enterocytes: 235.6
AA (arachidonic acid)	MAPT	NA	Cytoplasm, cytosol {ECO:0000269|PubMed:10747907, ECO:0000269|PubMed:23666762, ECO:0000269|PubMed:26014385}. Cell membrane {ECO:0000269|PubMed:10747907}; Peripheral membrane protein {ECO:0000269|PubMed:10747907}; Cytoplasmic side {ECO:0000269|PubMed:10747907}. Cytoplasm, cytoskeleton {ECO:0000269|PubMed:10747907}. Cell projection, axon {ECO:0000269|PubMed:10747907}. Cell projection, dendrite {ECO:…	phosphorylation	0	1	C	N	1	IPA	14690518	In a cell-free system, arachidonic acid increases (by 30-45 fold) dephosphorylation of phosphorylated human TAU [MAPT] protein that is increased by rat Ppp5c protein. Experiment Type: radioactive assay	0	0	NA	NA	NA	NA	NA	NA	NA	NA	Promotes microtubule assembly and stability, and might be involved in the establishment and maintenance of neuronal polarity (PubMed:21985311). The C-terminus binds axonal microtubules while the N-terminus binds neural plasma membrane components, suggesting that tau functions as a linker protein between both (PubMed:21985311, PubMed:32961270). Axonal polarity is predetermined by TAU/MAPT localiza…	NA	1	brain: 68.5;skeletal muscle: 79.7	Astrocytes: 142.4;Bipolar cells: 314.4;Early spermatids: 199.9;Excitatory neurons: 189.2;Horizontal cells: 361.7;Inhibitory neurons: 153.7;Late spermatids: 416.6;Muller glia cells: 145.7;Oligodendrocytes: 163.8
AA (arachidonic acid)	MRC1	NA	Endosome membrane {ECO:0000269|PubMed:20035344}; Single-pass type I membrane protein {ECO:0000269|PubMed:20035344}. Cell membrane {ECO:0000269|PubMed:20035344}; Single-pass type I membrane protein {ECO:0000269|PubMed:20035344}.	expression	0	1	0	0	0	IPA	15684433	In cell surface from human monocyte-derived dendritic cells, arachidonic acid decreases expression of human Mannose receptor [MRC1] protein.	0	0	NA	NA	NA	NA	NA	NA	NA	NA	Mediates the endocytosis of glycoproteins by macrophages. Binds both sulfated and non-sulfated polysaccharide chains.; (Microbial infection) Acts as phagocytic receptor for bacteria, fungi and other pathogens.; (Microbial infection) Acts as a receptor for Dengue virus envelope protein E. {ECO:0000269|PubMed:18266465}.; (Microbial infection) Interacts with Hepatitis B virus envelope protein. {ECO:…	NA	1	lung: 123.4	Breast glandular cells: 128.9;Hepatic stellate cells: 397.7;Hofbauer cells: 176.1;Kupffer cells: 361.4;Macrophages: 316.5
AA (arachidonic acid)	MRC1	NA	Endosome membrane {ECO:0000269|PubMed:20035344}; Single-pass type I membrane protein {ECO:0000269|PubMed:20035344}. Cell membrane {ECO:0000269|PubMed:20035344}; Single-pass type I membrane protein {ECO:0000269|PubMed:20035344}.	localization	1	1	0	0	0	IPA	23684988	Mouse Mr [Mrc1] protein increases release of arachidonic acid in mouse peritoneal macrophages that is increased by Leishmania infantum. Experiment Type: liquid scintillation counting	0	0	NA	NA	NA	NA	NA	NA	NA	NA	Mediates the endocytosis of glycoproteins by macrophages. Binds both sulfated and non-sulfated polysaccharide chains.; (Microbial infection) Acts as phagocytic receptor for bacteria, fungi and other pathogens.; (Microbial infection) Acts as a receptor for Dengue virus envelope protein E. {ECO:0000269|PubMed:18266465}.; (Microbial infection) Interacts with Hepatitis B virus envelope protein. {ECO:…	NA	1	lung: 123.4	Breast glandular cells: 128.9;Hepatic stellate cells: 397.7;Hofbauer cells: 176.1;Kupffer cells: 361.4;Macrophages: 316.5
AA (arachidonic acid)	SRSF3	NA	Nucleus {ECO:0000269|PubMed:11336712}. Nucleus speckle {ECO:0000269|PubMed:26876937}. Cytoplasm {ECO:0000269|PubMed:11336712}. Note=Recruited to nuclear speckles following interaction with YTHDC1. {ECO:0000269|PubMed:26876937}.	expression	0	1	N	N, presynaptic	1	IPA	23233666	In primary culture rat hepatocytes, arachidonic acid decreases amount of phosphorylated rat Srsf3 protein that is increased by Insulin protein(s). Experiment Type: Western blotting	0	1	NA	NA	NA	NA	NA	NA	NA	NA	Splicing factor that specifically promotes exon-inclusion during alternative splicing (PubMed:26876937). Interaction with YTHDC1, a RNA-binding protein that recognizes and binds N6-methyladenosine (m6A)-containing RNAs, promotes recruitment of SRSF3 to its mRNA-binding elements adjacent to m6A sites, leading to exon-inclusion during alternative splicing (PubMed:26876937). Also functions as export…	NA	1
ARF3	ATN1	Golgi apparatus {ECO:0000269|PubMed:17555535}. Cytoplasm, perinuclear region {ECO:0000269|PubMed:17555535}.	Nucleus. Cytoplasm, perinuclear region. Cell junction {ECO:0000250|UniProtKB:P54258}. Note=Shuttles between nucleus and cytoplasm. Colocalizes with FAT1 in the perinuclear area, at cell-cell junctions and leading edges of cells (By similarity). Colocalizes with MTG8 in discrete nuclear dots. Proteolytic fragment F1 appears to remain in nucleus. Fragment F2 is exported into the cytoplasm. Fragment…	protein-protein interactions	1	1	C	N	1	IPA	16713569	Binding of human ARF3 protein and human ATN1 protein occurs.	1	0	GTP-binding protein that functions as an allosteric activator of the cholera toxin catalytic subunit, an ADP-ribosyltransferase. Involved in protein trafficking; may modulate vesicle budding and uncoating within the Golgi apparatus.	NA	1						Transcriptional corepressor. Recruits NR2E1 to repress transcription. Promotes vascular smooth cell (VSMC) migration and orientation (By similarity). Corepressor of MTG8 transcriptional repression. Has some intrinsic repression activity which is independent of the number of poly-Gln (polyQ) repeats. {ECO:0000250|UniProtKB:O35126, ECO:0000269|PubMed:10085113, ECO:0000269|PubMed:10973986}.	NA	1
ARF3	BAG5	Golgi apparatus {ECO:0000269|PubMed:17555535}. Cytoplasm, perinuclear region {ECO:0000269|PubMed:17555535}.	NA; Cytosol, Mitochondrion, Nucleus, cytoplasm, inclusion body, membrane, perinuclear region of cytoplasm	protein-protein interactions	1	1	C	N	1	IPA	32850835	Binding of human ARF3 protein and human BAG5 protein occurs.	1	0	GTP-binding protein that functions as an allosteric activator of the cholera toxin catalytic subunit, an ADP-ribosyltransferase. Involved in protein trafficking; may modulate vesicle budding and uncoating within the Golgi apparatus.	NA	1						Inhibits both auto-ubiquitination of PRKN and ubiquitination of target proteins by PRKN (By similarity). May function as a nucleotide exchange factor for HSP/HSP70, promoting ADP release, and activating Hsp70-mediated refolding. {ECO:0000250, ECO:0000269|PubMed:20223214}.	NA	1	testis: 128.8	Early spermatids: 1734.2;Late spermatids: 1796.9
ARF3	ESR1	Golgi apparatus {ECO:0000269|PubMed:17555535}. Cytoplasm, perinuclear region {ECO:0000269|PubMed:17555535}.	[Isoform 1]: Nucleus {ECO:0000255|PROSITE-ProRule:PRU00407, ECO:0000269|PubMed:12682286, ECO:0000269|PubMed:20074560}. Cytoplasm {ECO:0000269|PubMed:12682286, ECO:0000269|PubMed:24498420}. Cell membrane {ECO:0000269|PubMed:12682286}; Peripheral membrane protein {ECO:0000269|PubMed:12682286}; Cytoplasmic side {ECO:0000269|PubMed:12682286}. Note=A minor fraction is associated with the inner membran…	protein-protein interactions	1	1	C	N	1	IPA	23403292	Binding of human ARF3 protein and human ESR1 protein occurs.	1	0	GTP-binding protein that functions as an allosteric activator of the cholera toxin catalytic subunit, an ADP-ribosyltransferase. Involved in protein trafficking; may modulate vesicle budding and uncoating within the Golgi apparatus.	NA	1						Nuclear hormone receptor. The steroid hormones and their receptors are involved in the regulation of eukaryotic gene expression and affect cellular proliferation and differentiation in target tissues. Ligand-dependent nuclear transactivation involves either direct homodimer binding to a palindromic estrogen response element (ERE) sequence or association with other DNA-binding transcription factor…	NA	1	cervix: 84.5;endometrium 1: 111.9;fallopian tube: 65.5	Breast glandular cells: 86.6;Endometrial ciliated cells: 77.9;Endometrial stromal cells: 79.9;Glandular and luminal cells: 98.9;Hepatocytes: 52.1;Horizontal cells: 62.2;Skeletal myocytes: 56.7
ARF3	TNFB	Golgi apparatus {ECO:0000269|PubMed:17555535}. Cytoplasm, perinuclear region {ECO:0000269|PubMed:17555535}.	Secreted, Membrane. Note: The homotrimer is secreted. The heterotrimer is membrane-associated.	protein-protein interactions	1	0	0	0	0	IPA		0	1	0	GTP-binding protein that functions as an allosteric activator of the cholera toxin catalytic subunit, an ADP-ribosyltransferase. Involved in protein trafficking; may modulate vesicle budding and uncoating within the Golgi apparatus.	NA	1						NA	NA	NA	NA	NA	NA	NA	NA
ARF3	NINL	Golgi apparatus {ECO:0000269|PubMed:17555535}. Cytoplasm, perinuclear region {ECO:0000269|PubMed:17555535}.	Cytoplasm, cytoskeleton, microtubule organizing center, centrosome {ECO:0000269|PubMed:16254247}. Cytoplasm {ECO:0000269|PubMed:16254247}. Note=In interphase cells, NINL is transported to the centrosomes by the dynein-dynactin motor complex (PubMed:16254247). During centrosome maturation, PLK1 directly phosphorylates NINL resulting in its release into the cytoplasm (PubMed:16254247).	protein-protein interactions	1	1	C	N	1	IPA	26485645	Binding of human ARF3 protein and human NINL protein occurs.	1	1	GTP-binding protein that functions as an allosteric activator of the cholera toxin catalytic subunit, an ADP-ribosyltransferase. Involved in protein trafficking; may modulate vesicle budding and uncoating within the Golgi apparatus.	NA	1						Involved in the microtubule organization in interphase cells. Overexpression induces the fragmentation of the Golgi, and causes lysosomes to disperse toward the cell periphery; it also interferes with mitotic spindle assembly. May play a role in ovarian carcinogenesis. {ECO:0000269|PubMed:12852856, ECO:0000269|PubMed:16254247, ECO:0000269|PubMed:18538832}.	NA	1		Astrocytes: 42.4;Granulosa cells: 29.6;Inhibitory neurons: 32.6;Oligodendrocyte precursor cells: 47.3
ARF3	PRMT1	Golgi apparatus {ECO:0000269|PubMed:17555535}. Cytoplasm, perinuclear region {ECO:0000269|PubMed:17555535}.	Nucleus {ECO:0000269|PubMed:10749851, ECO:0000269|PubMed:11387442, ECO:0000269|PubMed:16879614}. Nucleus, nucleoplasm {ECO:0000250|UniProtKB:Q9JIF0}. Cytoplasm {ECO:0000269|PubMed:26876602}. Cytoplasm, cytosol {ECO:0000250|UniProtKB:Q9JIF0}. Note=Mostly found in the cytoplasm. Colocalizes with CHTOP within the nucleus. Low levels detected also in the chromatin fraction (By similarity). {ECO:00002…	protein-protein interactions	1	1	C	N	1	IPA	25690678	Binding of human ARF3 protein and human PRMT1V2 protein in whole cell extract from stable MCF7 cells occurs.	1	0	GTP-binding protein that functions as an allosteric activator of the cholera toxin catalytic subunit, an ADP-ribosyltransferase. Involved in protein trafficking; may modulate vesicle budding and uncoating within the Golgi apparatus.	NA	1						Arginine methyltransferase that methylates (mono and asymmetric dimethylation) the guanidino nitrogens of arginyl residues present in proteins such as ESR1, histone H2, H3 and H4, ILF3, HNRNPA1, HNRNPD, NFATC2IP, SUPT5H, TAF15, EWS, HABP4 and SERBP1 (PubMed:10749851, PubMed:16879614, PubMed:26876602). Constitutes the main enzyme that mediates monomethylation and asymmetric dimethylation of histon…	NA	1		Basal respiratory cells: 444.9
ARF3	SLC6A4	Golgi apparatus {ECO:0000269|PubMed:17555535}. Cytoplasm, perinuclear region {ECO:0000269|PubMed:17555535}.	Cell membrane {ECO:0000269|PubMed:16870614, ECO:0000269|PubMed:17506858, ECO:0000269|PubMed:27049939}; Multi-pass membrane protein {ECO:0000250|UniProtKB:Q7K4Y6, ECO:0000269|PubMed:27049939}. Endomembrane system {ECO:0000269|PubMed:16870614}; Multi-pass membrane protein {ECO:0000255}. Endosome membrane {ECO:0000269|PubMed:16870614}; Multi-pass membrane protein {ECO:0000255}. Cell junction, synaps…	protein-protein interactions	1	1	C/CM	N, presynaptic	1	IPA	32581705	Binding of mouse Arf3 protein and mouse Slc6a4 protein occurs.	1	0	GTP-binding protein that functions as an allosteric activator of the cholera toxin catalytic subunit, an ADP-ribosyltransferase. Involved in protein trafficking; may modulate vesicle budding and uncoating within the Golgi apparatus.	NA	1						Serotonin transporter whose primary function in the central nervous system involves the regulation of serotonergic signaling via transport of serotonin molecules from the synaptic cleft back into the pre-synaptic terminal for re-utilization. Plays a key role in mediating regulation of the availability of serotonin to other receptors of serotonergic systems. Terminates the action of serotonin and …	NA	1	brain: 82.4;intestine: 40.7;lung: 29.1	Cytotrophoblasts: 125.4;Proximal enterocytes: 100.9;Syncytiotrophoblasts: 106.4	midbrain: 82.4	midbrain: 58.4	midbrain: 38.9;pons: 29.1
ARG (Arginine)	FN1			expression		1	S	N	1	IPA	10972680	L-arginine (1.7 mg/kg for 28 days) decreases expression of rat Fn [Fn1] mRNA in rat kidney that is increased by cyclosporin A (7.5 mg/kg for 28 days). Experiment Type: northern blot	0	0
ARG (Arginine)	MAPT			localization		1	0	0	0	IPA	31645758	L-arginine decreases accumulation of phosphorylated mouse Tau [Mapt] protein in mouse neocortex that is increased by high salt diet. Experiment Type: immunoblot	0	0
ARG (Arginine)	MPO			activation		1	C/LY	N	1	IPA	20144956	L-Arg [L-arginine] increases activity of MPO (Original Sentence: MPO activity and TNF-alpha expression in lung were upregulated in the ANP rats and further enhanced by pretreatment with L-Arg and attenuated by pretreatment with L-NAME, respectively.)	0	0
ARHGAP26	NRXN1	Cell junction, focal adhesion {ECO:0000250}. Cytoplasm, cytoskeleton {ECO:0000250}. Note=Colocalizes with actin stress fibers and cortical actin structures. {ECO:0000250}.	NA; presynaptic cell membrane; Single-pass type I membrane protein	protein-protein interactions	1	1	C/CM	N, presynaptic	1	IPA	27173435	Binding of human ARHGAP26 protein and human NRXN1 protein occurs. Experiment Type: affinity chromatography	0	1	GTPase-activating protein for RHOA and CDC42.	NA	1		Astrocytes: 237.3;Excitatory neurons: 611.6;Inhibitory neurons: 261.5;Late spermatids: 153.3;Microglial cells: 326.0				NA	NA	1	brain: 151.5	Astrocytes: 4025.1;Excitatory neurons: 3206.3;Inhibitory neurons: 2116.2;Oligodendrocyte precursor cells: 4897.8
ARHGAP26	FIP1L1	Cell junction, focal adhesion {ECO:0000250}. Cytoplasm, cytoskeleton {ECO:0000250}. Note=Colocalizes with actin stress fibers and cortical actin structures. {ECO:0000250}.	Nucleus.	protein-protein interactions	1	0	0	0	0	IPA	0	0	0	1	GTPase-activating protein for RHOA and CDC42.	NA	1		Astrocytes: 237.3;Excitatory neurons: 611.6;Inhibitory neurons: 261.5;Late spermatids: 153.3;Microglial cells: 326.0				Component of the cleavage and polyadenylation specificity factor (CPSF) complex that plays a key role in pre-mRNA 3'-end formation, recognizing the AAUAAA signal sequence and interacting with poly(A) polymerase and other factors to bring about cleavage and poly(A) addition. FIP1L1 contributes to poly(A) site recognition and stimulates poly(A) addition. Binds to U-rich RNA sequence elements surrou…	NA	1
ARHGAP26	SLC6A4	Cell junction, focal adhesion {ECO:0000250}. Cytoplasm, cytoskeleton {ECO:0000250}. Note=Colocalizes with actin stress fibers and cortical actin structures. {ECO:0000250}.	Cell membrane {ECO:0000269|PubMed:16870614, ECO:0000269|PubMed:17506858, ECO:0000269|PubMed:27049939}; Multi-pass membrane protein {ECO:0000250|UniProtKB:Q7K4Y6, ECO:0000269|PubMed:27049939}. Endomembrane system {ECO:0000269|PubMed:16870614}; Multi-pass membrane protein {ECO:0000255}. Endosome membrane {ECO:0000269|PubMed:16870614}; Multi-pass membrane protein {ECO:0000255}. Cell junction, synaps…	protein-protein interactions	1	1	0	0	0	IPA	0	0	0	0	GTPase-activating protein for RHOA and CDC42.	NA	1		Astrocytes: 237.3;Excitatory neurons: 611.6;Inhibitory neurons: 261.5;Late spermatids: 153.3;Microglial cells: 326.0				Serotonin transporter whose primary function in the central nervous system involves the regulation of serotonergic signaling via transport of serotonin molecules from the synaptic cleft back into the pre-synaptic terminal for re-utilization. Plays a key role in mediating regulation of the availability of serotonin to other receptors of serotonergic systems. Terminates the action of serotonin and …	NA	1	brain: 82.4;intestine: 40.7;lung: 29.1	Cytotrophoblasts: 125.4;Proximal enterocytes: 100.9;Syncytiotrophoblasts: 106.4	midbrain: 82.4	midbrain: 58.4	midbrain: 38.9;pons: 29.1
ARHGAP26	RHOA	Cell junction, focal adhesion {ECO:0000250}. Cytoplasm, cytoskeleton {ECO:0000250}. Note=Colocalizes with actin stress fibers and cortical actin structures. {ECO:0000250}.	Cell membrane; Lipid-anchor; Cytoplasmic side. Cytoplasm, cytoskeleton. Cleavage furrow. Cytoplasm, cell cortex {ECO:0000269|PubMed:9635436}. Midbody. Cell projection, lamellipodium {ECO:0000250|UniProtKB:Q9QUI0}. Cell projection, dendrite {ECO:0000250|UniProtKB:Q9QUI0}. Note=Localized to cell-cell contacts in calcium-treated keratinocytes (By similarity). Translocates to the equatorial region be…	activation		1	C	N, presynaptic	1	UniProt		GTPase-activating protein for RHOA and CDC42.	0	0	GTPase-activating protein for RHOA and CDC42.	NA	1		Astrocytes: 237.3;Excitatory neurons: 611.6;Inhibitory neurons: 261.5;Late spermatids: 153.3;Microglial cells: 326.0				Small GTPase which cycles between an active GTP-bound and an inactive GDP-bound state. Mainly associated with cytoskeleton organization, in active state binds to a variety of effector proteins to regulate cellular responses such as cytoskeletal dynamics, cell migration and cell cycle. Regulates a signal transduction pathway linking plasma membrane receptors to the assembly of focal adhesions and …	Mg(2+); Xref=ChEBI:CHEBI:18420; Evidence={ECO:0000269|PubMed:12777804};	1
ARHGEF3	EP300	Cytoplasm {ECO:0000250}.	Cytoplasm {ECO:0000269|PubMed:12929931, ECO:0000269|PubMed:20940255}. Nucleus {ECO:0000269|PubMed:12929931, ECO:0000269|PubMed:14645221, ECO:0000269|PubMed:16219772, ECO:0000269|PubMed:16574662, ECO:0000269|PubMed:17761950, ECO:0000269|PubMed:20940255}. Chromosome {ECO:0000269|PubMed:14645221, ECO:0000269|PubMed:25818647}. Note=Localizes to active chromatin: Colocalizes with histone H3 acetylated…	expression	1	0	0	0	0	IPA	24340053	Homozygous mutant mouse CBP [Crebbp] protein (other protein mutation p.[Y650A;A654Q;Y658A]) and heterozygous mutant mouse p300 [Ep300] protein (other protein mutation p.[Y631A;A635Q;Y639A]) increase expression of mouse Arhgef3 mRNA in mouse DP thymocytes Experiment Type: gene set enrichment analysis	0	1	Acts as guanine nucleotide exchange factor (GEF) for RhoA and RhoB GTPases. {ECO:0000269|PubMed:12221096}.	NA	1		Excitatory neurons: 157.8;NK-cells: 137.0				Functions as histone acetyltransferase and regulates transcription via chromatin remodeling (PubMed:23415232, PubMed:23934153, PubMed:8945521). Acetylates all four core histones in nucleosomes. Histone acetylation gives an epigenetic tag for transcriptional activation (PubMed:23415232, PubMed:23934153, PubMed:8945521). Mediates cAMP-gene regulation by binding specifically to phosphorylated CREB p…	NA	1
ARHGEF3	RICTOR	Cytoplasm {ECO:0000250}.	NA; Cytosol	protein-protein interactions	1	1	0	0	0	IPA	0	0	0	0	Acts as guanine nucleotide exchange factor (GEF) for RhoA and RhoB GTPases. {ECO:0000269|PubMed:12221096}.	NA	1		Excitatory neurons: 157.8;NK-cells: 137.0				Subunit of mTORC2, which regulates cell growth and survival in response to hormonal signals. mTORC2 is activated by growth factors, but, in contrast to mTORC1, seems to be nutrient-insensitive. mTORC2 seems to function upstream of Rho GTPases to regulate the actin cytoskeleton, probably by activating one or more Rho-type guanine nucleotide exchange factors. mTORC2 promotes the serum-induced forma…	NA	1		Oligodendrocyte precursor cells: 258.9;Oligodendrocytes: 343.1
ARHGEF3	RICTOR	Cytoplasm {ECO:0000250}.	NA; Cytosol	regulation of binding	1	1	0	0	0	IPA	0	0	0	0	Acts as guanine nucleotide exchange factor (GEF) for RhoA and RhoB GTPases. {ECO:0000269|PubMed:12221096}.	NA	1		Excitatory neurons: 157.8;NK-cells: 137.0				Subunit of mTORC2, which regulates cell growth and survival in response to hormonal signals. mTORC2 is activated by growth factors, but, in contrast to mTORC1, seems to be nutrient-insensitive. mTORC2 seems to function upstream of Rho GTPases to regulate the actin cytoskeleton, probably by activating one or more Rho-type guanine nucleotide exchange factors. mTORC2 promotes the serum-induced forma…	NA	1		Oligodendrocyte precursor cells: 258.9;Oligodendrocytes: 343.1
ARL8B	RNF4	Late endosome membrane {ECO:0000269|PubMed:16537643}. Lysosome membrane {ECO:0000269|PubMed:16650381, ECO:0000269|PubMed:21802320, ECO:0000269|PubMed:22172677, ECO:0000269|PubMed:25898167, ECO:0000269|PubMed:28325809, ECO:0000269|PubMed:29592961}. Cytoplasm, cytoskeleton, spindle {ECO:0000269|PubMed:15331635}. Cell projection, axon {ECO:0000250|UniProtKB:Q9CQW2}. Cell junction, synapse {ECO:00002…	Cytoplasm. Nucleus. Nucleus, PML body. Nucleus, nucleoplasm.	protein-protein interactions	1	1	C/EN	N, presynaptic	1	IPA	29180619	Binding of human ARL8B protein and human RNF4 protein occurs.	1	0	Small GTPase which cycles between active GTP-bound and inactive GDP-bound states (PubMed:15331635, PubMed:16537643). In its active state, binds to a variety of effector proteins playing a key role in the regulation of lysosomal positioning which is important for nutrient sensing, natural killer cell-mediated cytotoxicity and antigen presentation. Along with its effectors, orchestrates lysosomal t…	NA	1		Langerhans cells: 249.6				E3 ubiquitin-protein ligase which binds polysumoylated chains covalently attached to proteins and mediates 'Lys-6'-, 'Lys-11'-, 'Lys-48'- and 'Lys-63'-linked polyubiquitination of those substrates and their subsequent targeting to the proteasome for degradation. Regulates the degradation of several proteins including PML and the transcriptional activator PEA3. Involved in chromosome alignment and…	NA	1
ARVCF	ANK3	NA;adherens junction; cytoplasm; nucleus; plasma membrane	Cytoplasm, cytoskeleton {ECO:0000269|PubMed:21223964}. Cell projection, axon {ECO:0000250|UniProtKB:O70511}. Cell membrane, sarcolemma {ECO:0000269|PubMed:21223964}. Cell junction, synapse, postsynaptic cell membrane {ECO:0000250|UniProtKB:O70511}. Lysosome {ECO:0000250|UniProtKB:G5E8K5}. Cell membrane, sarcolemma, T-tubule {ECO:0000250|UniProtKB:O70511}. Note=In skeletal muscle, localized at cos…	protein-protein interactions	0	1	0	0	0	IPA	0	0	0	0	Involved in protein-protein interactions at adherens junctions.	NA	1		Astrocytes: 24.2;Cone photoreceptor cells: 22.9;Muller glia cells: 21.7				In skeletal muscle, required for costamere localization of DMD and betaDAG1 (By similarity). Membrane-cytoskeleton linker. May participate in the maintenance/targeting of ion channels and cell adhesion molecules at the nodes of Ranvier and axonal initial segments. Regulates KCNA1 channel activity in function of dietary Mg(2+) levels, and thereby contributes to the regulation of renal Mg(2+) reabs…	NA	1		Bipolar cells: 490.2;Excitatory neurons: 859.2;Inhibitory neurons: 881.3;Oligodendrocyte precursor cells: 592.6;Oligodendrocytes: 1579.5
ARVCF	CTNNA3	NA;adherens junction; cytoplasm; nucleus; plasma membrane	Cytoplasm, cytoskeleton {ECO:0000305}. Note=Localizes to intercalated disks of cardiomyocytes and in peritubular myoid cells of testis, and colocalizes with CTNNA1 and CTNNA2. {ECO:0000269|PubMed:11590244}.	protein-protein interactions	1	1	0	0	0	IPA	0	0	0	0	Involved in protein-protein interactions at adherens junctions.	NA	1		Astrocytes: 24.2;Cone photoreceptor cells: 22.9;Muller glia cells: 21.7				May be involved in formation of stretch-resistant cell-cell adhesion complexes. {ECO:0000303|PubMed:11590244}.	NA	1	brain: 172.3	Oligodendrocytes: 4054.6
ARVCF	KIRREL1	NA;adherens junction; cytoplasm; nucleus; plasma membrane	Cell membrane {ECO:0000305}; Single-pass type I membrane protein {ECO:0000305}. Note=Predominantly located at podocyte slit diaphragm.	protein-protein interactions	1	1	0	0	0	IPA	0	0	0	0	Involved in protein-protein interactions at adherens junctions.	NA	1		Astrocytes: 24.2;Cone photoreceptor cells: 22.9;Muller glia cells: 21.7				Plays a significant role in the normal development and function of the glomerular permeability. Signaling protein that needs the presence of TEC kinases to fully trans-activate the transcription factor AP-1 (By similarity). {ECO:0000250}.	NA	1		Adipocytes: 6.2;Alveolar cells type 1: 19.2;Breast myoepithelial cells: 6.9;Endometrial stromal cells: 19.4;Fibroblasts: 7.2;Smooth muscle cells: 16.8
ARVCF	MAPT	NA;adherens junction; cytoplasm; nucleus; plasma membrane	Cytoplasm, cytosol {ECO:0000269|PubMed:10747907, ECO:0000269|PubMed:23666762, ECO:0000269|PubMed:26014385}. Cell membrane {ECO:0000269|PubMed:10747907}; Peripheral membrane protein {ECO:0000269|PubMed:10747907}; Cytoplasmic side {ECO:0000269|PubMed:10747907}. Cytoplasm, cytoskeleton {ECO:0000269|PubMed:10747907}. Cell projection, axon {ECO:0000269|PubMed:10747907}. Cell projection, dendrite {ECO:…	protein-RNA interactions	1	1	0	0	0	IPA	0	0	0	0	Involved in protein-protein interactions at adherens junctions.	NA	1		Astrocytes: 24.2;Cone photoreceptor cells: 22.9;Muller glia cells: 21.7				Promotes microtubule assembly and stability, and might be involved in the establishment and maintenance of neuronal polarity (PubMed:21985311). The C-terminus binds axonal microtubules while the N-terminus binds neural plasma membrane components, suggesting that tau functions as a linker protein between both (PubMed:21985311, PubMed:32961270). Axonal polarity is predetermined by TAU/MAPT localiza…	NA	1	brain: 68.5;skeletal muscle: 79.7	Astrocytes: 142.4;Bipolar cells: 314.4;Early spermatids: 199.9;Excitatory neurons: 189.2;Horizontal cells: 361.7;Inhibitory neurons: 153.7;Late spermatids: 416.6;Muller glia cells: 145.7;Oligodendrocytes: 163.8
ARVCF	SEL1L	NA;adherens junction; cytoplasm; nucleus; plasma membrane	Endoplasmic reticulum membrane {ECO:0000269|PubMed:16186509}; Single-pass type I membrane protein {ECO:0000269|PubMed:16186509}.	protein-protein interactions	1	1	0	0	0	IPA	0	0	0	0	Involved in protein-protein interactions at adherens junctions.	NA	1		Astrocytes: 24.2;Cone photoreceptor cells: 22.9;Muller glia cells: 21.7				Plays a role in the endoplasmic reticulum quality control (ERQC) system also called ER-associated degradation (ERAD) involved in ubiquitin-dependent degradation of misfolded endoplasmic reticulum proteins (PubMed:16186509). Enhances SYVN1 stability. Plays a role in LPL maturation and secretion. Required for normal differentiation of the pancreas epithelium, and for normal exocrine function and su…	NA	1	pancreas: 406.9	Plasma cells: 238.9
ARVCF	TJP1	NA;adherens junction; cytoplasm; nucleus; plasma membrane	Cell membrane {ECO:0000269|PubMed:7798316}; Peripheral membrane protein {ECO:0000269|PubMed:7798316}; Cytoplasmic side {ECO:0000269|PubMed:7798316}. Cell junction, tight junction {ECO:0000269|PubMed:7798316}. Cell junction {ECO:0000269|PubMed:28169360}. Cell junction, gap junction. Cell projection, podosome {ECO:0000269|PubMed:20930113}. Note=Moves from the cytoplasm to the cell membrane concurre…	protein-protein interactions	1	1	0	0	0	IPA	0	0	0	0	Involved in protein-protein interactions at adherens junctions.	NA	1		Astrocytes: 24.2;Cone photoreceptor cells: 22.9;Muller glia cells: 21.7				TJP1, TJP2, and TJP3 are closely related scaffolding proteins that link tight junction (TJ) transmembrane proteins such as claudins, junctional adhesion molecules, and occludin to the actin cytoskeleton (PubMed:7798316, PubMed:9792688). The tight junction acts to limit movement of substances through the paracellular space and as a boundary between the compositionally distinct apical and basolater…	NA	1		Oligodendrocytes: 893.8
ASB3	TNFRSF1B	NA; Cytosol, Plasma Membrane, T-tubule	[Isoform 1]: Cell membrane; Single-pass type I membrane protein.; SUBCELLULAR LOCATION: [Isoform 2]: Secreted.; SUBCELLULAR LOCATION: [Tumor necrosis factor-binding protein 2]: Secreted.	molecular cleavage		1	C/CM	N, presynaptic	1	UniProt	15899873	Ankyrin repeat and SOCS box 3 (ASB3) mediates ubiquitination and degradation of tumor necrosis factor receptor II (TNFRSF1B).	0	0	Probable substrate-recognition component of a SCF-like ECS (Elongin-Cullin-SOCS-box protein) E3 ubiquitin-protein ligase complex which mediates the ubiquitination and subsequent proteasomal degradation of target proteins. Recognizes TNFRSF1B. {ECO:0000269|PubMed:15899873}.	NA	1
ASB3	TROAP	NA; Cytosol, Plasma Membrane, T-tubule	Cytoplasm.	protein-protein interactions	1	1	C	N	1	IPA	28514442	Binding of human ASB3 protein and human TROAP protein occurs. Experiment Type: affinity chromatography	0	1	Probable substrate-recognition component of a SCF-like ECS (Elongin-Cullin-SOCS-box protein) E3 ubiquitin-protein ligase complex which mediates the ubiquitination and subsequent proteasomal degradation of target proteins. Recognizes TNFRSF1B. {ECO:0000269|PubMed:15899873}.	NA	1						Could be involved with bystin and trophinin in a cell adhesion molecule complex that mediates an initial attachment of the blastocyst to uterine epithelial cells at the time of the embryo implantation.	NA	1	bone marrow: 51.5;lymphoid tissue: 37.1;testis: 29.4	Early spermatids: 71.5;Erythroid cells: 75.6;Late spermatids: 70.2;Spermatocytes: 29.1
ASB3	HSP90AA1	NA; Cytosol, Plasma Membrane, T-tubule	Nucleus {ECO:0000250|UniProtKB:P07901}. Cytoplasm {ECO:0000250|UniProtKB:P07901}. Melanosome {ECO:0000269|PubMed:17081065}. Cell membrane {ECO:0000269|PubMed:11276205}. Mitochondrion {ECO:0000269|PubMed:25609812}. Note=Identified by mass spectrometry in melanosome fractions from stage I to stage IV.	protein-protein interactions	1	1	C	N|N, presynaptic	1	IPA	22939624	Binding of human ASB3 protein and human HSP90AA1 protein occurs. Experiment Type: affinity chromatography	0	1	Probable substrate-recognition component of a SCF-like ECS (Elongin-Cullin-SOCS-box protein) E3 ubiquitin-protein ligase complex which mediates the ubiquitination and subsequent proteasomal degradation of target proteins. Recognizes TNFRSF1B. {ECO:0000269|PubMed:15899873}.	NA	1						Molecular chaperone that promotes the maturation, structural maintenance and proper regulation of specific target proteins involved for instance in cell cycle control and signal transduction. Undergoes a functional cycle that is linked to its ATPase activity which is essential for its chaperone activity. This cycle probably induces conformational changes in the client proteins, thereby causing th…	NA	1	brain: 2035.0	Basal prostatic cells: 12150.7;Urothelial cells: 5781.1
ASB3	RICTOR	NA; Cytosol, Plasma Membrane, T-tubule	NA; Cytosol	protein-protein interactions	1	1	0	0	0	IPA	0	0	0	0	Probable substrate-recognition component of a SCF-like ECS (Elongin-Cullin-SOCS-box protein) E3 ubiquitin-protein ligase complex which mediates the ubiquitination and subsequent proteasomal degradation of target proteins. Recognizes TNFRSF1B. {ECO:0000269|PubMed:15899873}.	NA	1						Subunit of mTORC2, which regulates cell growth and survival in response to hormonal signals. mTORC2 is activated by growth factors, but, in contrast to mTORC1, seems to be nutrient-insensitive. mTORC2 seems to function upstream of Rho GTPases to regulate the actin cytoskeleton, probably by activating one or more Rho-type guanine nucleotide exchange factors. mTORC2 promotes the serum-induced forma…	NA	1		Oligodendrocyte precursor cells: 258.9;Oligodendrocytes: 343.1
ASB3	SAMD11	NA; Cytosol, Plasma Membrane, T-tubule	Nucleus {ECO:0000250}.	protein-protein interactions	1	0	0	0	0	IPA	0	0	0	0	Probable substrate-recognition component of a SCF-like ECS (Elongin-Cullin-SOCS-box protein) E3 ubiquitin-protein ligase complex which mediates the ubiquitination and subsequent proteasomal degradation of target proteins. Recognizes TNFRSF1B. {ECO:0000269|PubMed:15899873}.	NA	1						May play a role in photoreceptor development. {ECO:0000250}.	NA	1		Rod photoreceptor cells: 266.9
ASB3	TSPYL5	NA; Cytosol, Plasma Membrane, T-tubule	NA; Nucleus, chromatin	expression	1	1	0	0	0	IPA	0	0	0	0	Probable substrate-recognition component of a SCF-like ECS (Elongin-Cullin-SOCS-box protein) E3 ubiquitin-protein ligase complex which mediates the ubiquitination and subsequent proteasomal degradation of target proteins. Recognizes TNFRSF1B. {ECO:0000269|PubMed:15899873}.	NA	1						Involved in modulation of cell growth and cellular response to gamma radiation probably via regulation of the Akt signaling pathway. Involved in regulation of p53/TP53. Suppresses p53/TP53 protein levels and promotes its ubiquitination; the function is dependent on USP7 and independent on MDM2. Proposed to displace p53/TP53 from interaction with USP7. {ECO:0000269|PubMed:20079711, ECO:0000269|Pub…	NA	1	testis: 45.1	Early spermatids: 172.9;Late spermatids: 419.0
ASB3	TSPYL5	NA; Cytosol, Plasma Membrane, T-tubule	NA; Nucleus, chromatin	protein-DNA interactions	1	0	0	0	0	IPA	0	0	0	0	Probable substrate-recognition component of a SCF-like ECS (Elongin-Cullin-SOCS-box protein) E3 ubiquitin-protein ligase complex which mediates the ubiquitination and subsequent proteasomal degradation of target proteins. Recognizes TNFRSF1B. {ECO:0000269|PubMed:15899873}.	NA	1						Involved in modulation of cell growth and cellular response to gamma radiation probably via regulation of the Akt signaling pathway. Involved in regulation of p53/TP53. Suppresses p53/TP53 protein levels and promotes its ubiquitination; the function is dependent on USP7 and independent on MDM2. Proposed to displace p53/TP53 from interaction with USP7. {ECO:0000269|PubMed:20079711, ECO:0000269|Pub…	NA	1	testis: 45.1	Early spermatids: 172.9;Late spermatids: 419.0
ASB8	KIF26B	Cytoplasm {ECO:0000269|PubMed:12559969}.	Cytoplasm {ECO:0000250}. Cytoplasm, cytoskeleton {ECO:0000305}.	protein-protein interactions	1	1	CS	N	1	IPA	24337577	Binding of human ASB8 protein and human KIF26B protein occurs.	1	0	May be a substrate-recognition component of a SCF-like ECS (Elongin-Cullin-SOCS-box protein) E3 ubiquitin-protein ligase complex which mediates the ubiquitination and subsequent proteasomal degradation of target proteins. {ECO:0000250}.	NA	1	skeletal muscle: 294.7;tongue: 186.1	Rod photoreceptor cells: 120.0				Essential for embryonic kidney development. Plays an important role in the compact adhesion between mesenchymal cells adjacent to the ureteric buds, possibly by interacting with MYH10. This could lead to the establishment of the basolateral integrity of the mesenchyme and the polarized expression of ITGA8, which maintains the GDNF expression required for further ureteric bud attraction. Although …	NA	1	brain: 5.7	Inhibitory neurons: 282.0;Oligodendrocyte precursor cells: 378.0
Vit C (Ascorbic acid)	CASP8		Cytoplasm {ECO:0000250|UniProtKB:Q9JHX4}. Nucleus {ECO:0000250|UniProtKB:Q9JHX4}.	activation		1	C	N, presynaptic	1	IPA	12623840	In U937 cells, accumulation of vitamin C [ascorbic acid] in the intracellular space decreases activation of human Caspase 8 [CASP8] protein that is increased by Fasl [FASLG] protein. Experiment Type: enzyme activity assay	0	0
Vit C (Ascorbic acid)	CDKN1A			activation		1	C	N, presynaptic	1	IPA	20400526	Vitamin C [ascorbic acid] increases induction of Cdkn1a (Original Sentence: In addition, VC (200 muM) induced Cdkn1a and Casp8, partially inhibited Irs3, and together with insulin drastically reduced Gpdh (listed as Gpd1 in the MGI database) gene expressions.)	0	1
Vit C (Ascorbic acid)	COL6A3		Secreted, extracellular space, extracellular matrix {ECO:0000250}.	localization		1	0	0	0	IPA	18390756	Ascorbic acid increases secretion of human COL6A3 protein from differentiating thp-1 cells. Experiment Type: Western blotting	0	0
Vit C (Ascorbic acid)	ETS1			activation		1	N	N, presynaptic	1	IPA	20163451	Vitamin C [ascorbic acid] increases inhibition of active Ets-1 transcriptional factor [ETS1] (Original Sentence: Ets-1 transcriptional factor, which is involved in the regulation of collagen expression by LL-37, was also inhibited by vitamin C.)	0	0
Vit C (Ascorbic acid)	SLC23A1			expression		1	S/CM	N, presynaptic	1	IPA	11984597	Homozygous frameshift mutant mouse Slc23a1 gene (knockout) in mouse decreases quantity of ascorbic acid in mouse brain.	0	1									Sodium/ascorbate cotransporter. Mediates electrogenic uptake of vitamin C, with a stoichiometry of 2 Na(+) for each ascorbate.	NA	1	fallopian tube: 54.6;intestine: 65.8;kidney: 40.6;liver: 22.6	Endometrial ciliated cells: 65.2;Hepatocytes: 19.3;Proximal enterocytes: 131.7;Proximal tubular cells: 27.0
ASH1L	BRPF3	Nucleus {ECO:0000269|PubMed:10860993}. Cell junction, tight junction {ECO:0000269|PubMed:10860993}. Chromosome {ECO:0000305|PubMed:10860993}. Note=The relevance of tight junction localization is however unclear. {ECO:0000269|PubMed:10860993}.	Nucleus {ECO:0000269|PubMed:26677226}.	protein-protein interactions	1	1	N	N	1	IPA	31753913	Binding of human ASH1L protein and human BRPF3 protein occurs.	1	1	Histone methyltransferase specifically trimethylating 'Lys-36' of histone H3 forming H3K36me3 (PubMed:21239497). Also monomethylates 'Lys-9' of histone H3 (H3K9me1) in vitro (By similarity). The physiological significance of the H3K9me1 activity is unclear (By similarity). {ECO:0000250|UniProtKB:Q99MY8, ECO:0000269|PubMed:21239497}.	NA	1						Scaffold subunit of various histone acetyltransferase (HAT) complexes, such as the MOZ/MORF and HBO1 complexes, which have a histone H3 acetyltransferase activity (PubMed:16387653, PubMed:26620551, PubMed:26677226). Plays a role in DNA replication initiation by directing KAT7/HBO1 specificity towards histone H3 'Lys-14' acetylation (H3K14ac), thereby facilitating the activation of replication ori…	NA	1
ASH1L	MESD	Nucleus {ECO:0000269|PubMed:10860993}. Cell junction, tight junction {ECO:0000269|PubMed:10860993}. Chromosome {ECO:0000305|PubMed:10860993}. Note=The relevance of tight junction localization is however unclear. {ECO:0000269|PubMed:10860993}.	Endoplasmic reticulum {ECO:0000269|PubMed:15014448, ECO:0000269|PubMed:17488095}. Note=Released from apoptotic cells and shed photoreceptor outer segments. {ECO:0000250|UniProtKB:Q9ERE7}.	protein-protein interactions	1	0	0	0	0	IPA	0	0	1	0	Histone methyltransferase specifically trimethylating 'Lys-36' of histone H3 forming H3K36me3 (PubMed:21239497). Also monomethylates 'Lys-9' of histone H3 (H3K9me1) in vitro (By similarity). The physiological significance of the H3K9me1 activity is unclear (By similarity). {ECO:0000250|UniProtKB:Q99MY8, ECO:0000269|PubMed:21239497}.	NA	1						Chaperone specifically assisting the folding of beta-propeller/EGF modules within the family of low-density lipoprotein receptors (LDLRs) (PubMed:15014448). Acts as a modulator of the Wnt pathway through chaperoning the coreceptors of the canonical Wnt pathway, LRP5 and LRP6, to the plasma membrane (PubMed:17488095). Essential for specification of embryonic polarity and mesoderm induction. Plays …	NA	1		Cytotrophoblasts: 341.4;Extravillous trophoblasts: 279.3;Syncytiotrophoblasts: 436.0
ASH1L	MORF4L2	Nucleus {ECO:0000269|PubMed:10860993}. Cell junction, tight junction {ECO:0000269|PubMed:10860993}. Chromosome {ECO:0000305|PubMed:10860993}. Note=The relevance of tight junction localization is however unclear. {ECO:0000269|PubMed:10860993}.	Nucleus.	protein-protein interactions	1	1	N	N	1	IPA	28514442	Binding of human ASH1L protein and human MORF4L2 protein occurs.	1	0	Histone methyltransferase specifically trimethylating 'Lys-36' of histone H3 forming H3K36me3 (PubMed:21239497). Also monomethylates 'Lys-9' of histone H3 (H3K9me1) in vitro (By similarity). The physiological significance of the H3K9me1 activity is unclear (By similarity). {ECO:0000250|UniProtKB:Q99MY8, ECO:0000269|PubMed:21239497}.	NA	1						Component of the NuA4 histone acetyltransferase complex which is involved in transcriptional activation of select genes principally by acetylation of nucleosomal histone H4 and H2A. This modification may both alter nucleosome - DNA interactions and promote interaction of the modified histones with other proteins which positively regulate transcription. This complex may be required for the activat…	NA	1		Extravillous trophoblasts: 1214.1
ASH1L	THAP7	Nucleus {ECO:0000269|PubMed:10860993}. Cell junction, tight junction {ECO:0000269|PubMed:10860993}. Chromosome {ECO:0000305|PubMed:10860993}. Note=The relevance of tight junction localization is however unclear. {ECO:0000269|PubMed:10860993}.	Nucleus. Chromosome.	protein-protein interactions	1	1	N	N	1	IPA	28514442	Binding of human ASH1L protein and human THAP7 protein occurs.	1	0	Histone methyltransferase specifically trimethylating 'Lys-36' of histone H3 forming H3K36me3 (PubMed:21239497). Also monomethylates 'Lys-9' of histone H3 (H3K9me1) in vitro (By similarity). The physiological significance of the H3K9me1 activity is unclear (By similarity). {ECO:0000250|UniProtKB:Q99MY8, ECO:0000269|PubMed:21239497}.	NA	1						Chromatin-associated, histone tail-binding protein that represses transcription via recruitment of HDAC3 and nuclear hormone receptor corepressors. {ECO:0000269|PubMed:15561719}.	NA	1		Spermatocytes: 162.9;Spermatogonia: 119.4
ASPN	CDKN1A	Secreted, extracellular space, extracellular matrix {ECO:0000269|PubMed:17827158}.	Cytoplasm {ECO:0000269|PubMed:11463845}. Nucleus {ECO:0000269|PubMed:11463845, ECO:0000269|PubMed:23213251}.	expression	1	1	0	0	0	IPA	0	0	0	1	Negatively regulates periodontal ligament (PDL) differentiation and mineralization to ensure that the PDL is not ossified and to maintain homeostasis of the tooth-supporting system. Inhibits BMP2-induced cytodifferentiation of PDL cells by preventing its binding to BMPR1B/BMP type-1B receptor, resulting in inhibition of BMP-dependent activation of SMAD proteins (By similarity). Critical regulator…	NA	1	heart muscle: 96.2;smooth muscle: 111.5	Basal keratinocytes: 67.2;Fibroblasts: 94.6;Microglial cells: 24.4;Sertoli cells: 39.5;Smooth muscle cells: 73.5;Suprabasal keratinocytes: 27.0				May be involved in p53/TP53 mediated inhibition of cellular proliferation in response to DNA damage. Binds to and inhibits cyclin-dependent kinase activity, preventing phosphorylation of critical cyclin-dependent kinase substrates and blocking cell cycle progression. Functions in the nuclear localization and assembly of cyclin D-CDK4 complex and promotes its kinase activity towards RB1. At higher…	NA	1				olfactory bulb: 76.0
ASTN2	FAM98B	Membrane {ECO:0000250|UniProtKB:Q80Z10}; Multi-pass membrane protein {ECO:0000250|UniProtKB:Q80Z10}. Perikaryon {ECO:0000250|UniProtKB:Q80Z10}. Cytoplasm, cell cortex {ECO:0000250|UniProtKB:Q80Z10}. Early endosome {ECO:0000250|UniProtKB:Q80Z10}. Late endosome {ECO:0000250|UniProtKB:Q80Z10}. Cytoplasmic vesicle, clathrin-coated vesicle {ECO:0000250|UniProtKB:Q80Z10}. Cytoplasmic vesicle {ECO:00002…	Nucleus {ECO:0000269|PubMed:24608264}. Cytoplasm {ECO:0000269|PubMed:18445686, ECO:0000269|PubMed:24608264}.	protein-protein interactions	1	1	C	N	1	IPA	30242134	Binding of mouse Astn2 protein and mouse Fam98b protein in cerebellum from mouse brain occurs. FAM98B positively stimulates PRMT1-induced protein arginine dimethylated arginine methylation (PubMed:28040436). (drawn)	1	0	Mediates recycling of the neuronal cell adhesion molecule ASTN1 to the anterior pole of the cell membrane in migrating neurons. Promotes ASTN1 internalization and intracellular transport of endocytosed ASTN1 (By similarity). Selectively binds inositol-4,5-bisphosphate, inositol-3,4,5-trisphosphate and inositol-1,3,4,5-tetrakisphosphate, suggesting it is recruited to membranes that contain lipids …	NA	1	brain: 40.0	Astrocytes: 354.6;Excitatory neurons: 370.0;Inhibitory neurons: 1011.0;Late spermatids: 228.2;Oligodendrocyte precursor cells: 900.3;Oligodendrocytes: 225.9				Positively stimulates PRMT1-induced protein arginine dimethylated arginine methylation (PubMed:28040436). Promotes colorectal cancer cell malignancy (PubMed:28040436). {ECO:0000269|PubMed:28040436}.	NA	1
ASTN2	OLFM1	Membrane {ECO:0000250|UniProtKB:Q80Z10}; Multi-pass membrane protein {ECO:0000250|UniProtKB:Q80Z10}. Perikaryon {ECO:0000250|UniProtKB:Q80Z10}. Cytoplasm, cell cortex {ECO:0000250|UniProtKB:Q80Z10}. Early endosome {ECO:0000250|UniProtKB:Q80Z10}. Late endosome {ECO:0000250|UniProtKB:Q80Z10}. Cytoplasmic vesicle, clathrin-coated vesicle {ECO:0000250|UniProtKB:Q80Z10}. Cytoplasmic vesicle {ECO:00002…	Secreted {ECO:0000250|UniProtKB:O88998}. Cell junction, synapse {ECO:0000250|UniProtKB:O88998}. Endoplasmic reticulum {ECO:0000250|UniProtKB:O88998}. Cell projection, axon {ECO:0000250|UniProtKB:O88998}. Perikaryon {ECO:0000250|UniProtKB:O88998}.	protein-protein interactions	1	1	0	0	0	IPA	30242134	Binding of mouse Astn2 protein and mouse Olfm1 protein in cerebellum from mouse brain occurs.	1	0	Mediates recycling of the neuronal cell adhesion molecule ASTN1 to the anterior pole of the cell membrane in migrating neurons. Promotes ASTN1 internalization and intracellular transport of endocytosed ASTN1 (By similarity). Selectively binds inositol-4,5-bisphosphate, inositol-3,4,5-trisphosphate and inositol-1,3,4,5-tetrakisphosphate, suggesting it is recruited to membranes that contain lipids …	NA	1	brain: 40.0	Astrocytes: 354.6;Excitatory neurons: 370.0;Inhibitory neurons: 1011.0;Late spermatids: 228.2;Oligodendrocyte precursor cells: 900.3;Oligodendrocytes: 225.9				Contributes to the regulation of axonal growth in the embryonic and adult central nervous system by inhibiting interactions between RTN4R and LINGO1. Inhibits RTN4R-mediated axon growth cone collapse (By similarity). May play an important role in regulating the production of neural crest cells by the neural tube (By similarity). May be required for normal responses to olfactory stimuli (By simila…	NA	1	brain: 549.1;choroid plexus: 260.5	Excitatory neurons: 193.1;Hepatic stellate cells: 78.1;Inhibitory neurons: 70.0
ASTN2	OXNAD1	Membrane {ECO:0000250|UniProtKB:Q80Z10}; Multi-pass membrane protein {ECO:0000250|UniProtKB:Q80Z10}. Perikaryon {ECO:0000250|UniProtKB:Q80Z10}. Cytoplasm, cell cortex {ECO:0000250|UniProtKB:Q80Z10}. Early endosome {ECO:0000250|UniProtKB:Q80Z10}. Late endosome {ECO:0000250|UniProtKB:Q80Z10}. Cytoplasmic vesicle, clathrin-coated vesicle {ECO:0000250|UniProtKB:Q80Z10}. Cytoplasmic vesicle {ECO:00002…	NA; cytoplasm	protein-protein interactions	1	1	C	N	1	IPA	30242134	Binding of mouse Astn2 protein and mouse Oxnad1 protein in cerebellum from mouse brain occurs.	1	0	Mediates recycling of the neuronal cell adhesion molecule ASTN1 to the anterior pole of the cell membrane in migrating neurons. Promotes ASTN1 internalization and intracellular transport of endocytosed ASTN1 (By similarity). Selectively binds inositol-4,5-bisphosphate, inositol-3,4,5-trisphosphate and inositol-1,3,4,5-tetrakisphosphate, suggesting it is recruited to membranes that contain lipids …	NA	1	brain: 40.0	Astrocytes: 354.6;Excitatory neurons: 370.0;Inhibitory neurons: 1011.0;Late spermatids: 228.2;Oligodendrocyte precursor cells: 900.3;Oligodendrocytes: 225.9				NA	NA	1		Excitatory neurons: 67.0;Inhibitory neurons: 62.8;T-cells: 90.0
ATN1	AGRN	Nucleus. Cytoplasm, perinuclear region. Cell junction {ECO:0000250|UniProtKB:P54258}. Note=Shuttles between nucleus and cytoplasm. Colocalizes with FAT1 in the perinuclear area, at cell-cell junctions and leading edges of cells (By similarity). Colocalizes with MTG8 in discrete nuclear dots. Proteolytic fragment F1 appears to remain in nucleus. Fragment F2 is exported into the cytoplasm. Fragment…	[Isoform 1]: Secreted, extracellular space, extracellular matrix {ECO:0000269|PubMed:20551380}. Note=Synaptic basal lamina at the neuromuscular junction. {ECO:0000250|UniProtKB:P31696}.; [Isoform 2]: Cell junction, synapse {ECO:0000250|UniProtKB:A2ASQ1}. Cell membrane {ECO:0000250|UniProtKB:A2ASQ1}; Single-pass type II membrane protein {ECO:0000250|UniProtKB:A2ASQ1}.	protein-protein interactions	0	1	C/CM	N	1	IPA	16713569	Binding of human AGRN protein and human ATN1 protein occurs.	0	1	Transcriptional corepressor. Recruits NR2E1 to repress transcription. Promotes vascular smooth cell (VSMC) migration and orientation (By similarity). Corepressor of MTG8 transcriptional repression. Has some intrinsic repression activity which is independent of the number of poly-Gln (polyQ) repeats. {ECO:0000250|UniProtKB:O35126, ECO:0000269|PubMed:10085113, ECO:0000269|PubMed:10973986}.	NA	1						[Isoform 1]: heparan sulfate basal lamina glycoprotein that plays a central role in the formation and the maintenance of the neuromuscular junction (NMJ) and directs key events in postsynaptic differentiation. Component of the AGRN-LRP4 receptor complex that induces the phosphorylation and activation of MUSK. The activation of MUSK in myotubes induces the formation of NMJ by regulating different …	NA	1		Basal respiratory cells: 94.5;Collecting duct cells: 156.3;Ductal cells: 91.2;Pancreatic endocrine cells: 87.3
ATN1	ARF3	Nucleus. Cytoplasm, perinuclear region. Cell junction {ECO:0000250|UniProtKB:P54258}. Note=Shuttles between nucleus and cytoplasm. Colocalizes with FAT1 in the perinuclear area, at cell-cell junctions and leading edges of cells (By similarity). Colocalizes with MTG8 in discrete nuclear dots. Proteolytic fragment F1 appears to remain in nucleus. Fragment F2 is exported into the cytoplasm. Fragment…	Golgi apparatus {ECO:0000269|PubMed:17555535}. Cytoplasm, perinuclear region {ECO:0000269|PubMed:17555535}.	protein-protein interactions	0	1	C	N	1	IPA	16713569	Binding of human ARF3 protein and human ATN1 protein occurs.	0	1	Transcriptional corepressor. Recruits NR2E1 to repress transcription. Promotes vascular smooth cell (VSMC) migration and orientation (By similarity). Corepressor of MTG8 transcriptional repression. Has some intrinsic repression activity which is independent of the number of poly-Gln (polyQ) repeats. {ECO:0000250|UniProtKB:O35126, ECO:0000269|PubMed:10085113, ECO:0000269|PubMed:10973986}.	NA	1						GTP-binding protein that functions as an allosteric activator of the cholera toxin catalytic subunit, an ADP-ribosyltransferase. Involved in protein trafficking; may modulate vesicle budding and uncoating within the Golgi apparatus.	NA	1
ATN1	BHLHE40	Nucleus. Cytoplasm, perinuclear region. Cell junction {ECO:0000250|UniProtKB:P54258}. Note=Shuttles between nucleus and cytoplasm. Colocalizes with FAT1 in the perinuclear area, at cell-cell junctions and leading edges of cells (By similarity). Colocalizes with MTG8 in discrete nuclear dots. Proteolytic fragment F1 appears to remain in nucleus. Fragment F2 is exported into the cytoplasm. Fragment…	Cytoplasm {ECO:0000269|PubMed:21829689}. Nucleus {ECO:0000269|PubMed:11278694, ECO:0000269|PubMed:21829689, ECO:0000269|PubMed:28797635}. Note=Predominantly localized in the nucleus (PubMed:11278694). {ECO:0000269|PubMed:11278694}.	expression	0	1	0	0	0	IPA	0	0	0	0	Transcriptional corepressor. Recruits NR2E1 to repress transcription. Promotes vascular smooth cell (VSMC) migration and orientation (By similarity). Corepressor of MTG8 transcriptional repression. Has some intrinsic repression activity which is independent of the number of poly-Gln (polyQ) repeats. {ECO:0000250|UniProtKB:O35126, ECO:0000269|PubMed:10085113, ECO:0000269|PubMed:10973986}.	NA	1						Transcriptional repressor involved in the regulation of the circadian rhythm by negatively regulating the activity of the clock genes and clock-controlled genes (PubMed:12397359, PubMed:18411297). Acts as the negative limb of a novel autoregulatory feedback loop (DEC loop) which differs from the one formed by the PER and CRY transcriptional repressors (PER/CRY loop) (PubMed:14672706). Both these …	NA	1		Glandular and luminal cells: 386.7;granulocytes: 439.2;Squamous epithelial cells: 517.2
ATN1	CASP8	Nucleus. Cytoplasm, perinuclear region. Cell junction {ECO:0000250|UniProtKB:P54258}. Note=Shuttles between nucleus and cytoplasm. Colocalizes with FAT1 in the perinuclear area, at cell-cell junctions and leading edges of cells (By similarity). Colocalizes with MTG8 in discrete nuclear dots. Proteolytic fragment F1 appears to remain in nucleus. Fragment F2 is exported into the cytoplasm. Fragment…	Cytoplasm {ECO:0000250|UniProtKB:Q9JHX4}. Nucleus {ECO:0000250|UniProtKB:Q9JHX4}.	molecular cleavage	1	1	0	0	0	IPA	0	0	0	0	Transcriptional corepressor. Recruits NR2E1 to repress transcription. Promotes vascular smooth cell (VSMC) migration and orientation (By similarity). Corepressor of MTG8 transcriptional repression. Has some intrinsic repression activity which is independent of the number of poly-Gln (polyQ) repeats. {ECO:0000250|UniProtKB:O35126, ECO:0000269|PubMed:10085113, ECO:0000269|PubMed:10973986}.	NA	1						Thiol protease that plays a key role in programmed cell death by acting as a molecular switch for apoptosis, necroptosis and pyroptosis, and is required to prevent tissue damage during embryonic development and adulthood (By similarity). Initiator protease that induces extrinsic apoptosis by mediating cleavage and activation of effector caspases responsible for the TNFRSF6/FAS mediated and TNFRSF…	NA	1	bone marrow: 67.2	dendritic cells: 107.4;NK-cells: 132.8;Plasma cells: 73.4;T-cells: 86.9
ATN1	CDK2AP1	Nucleus. Cytoplasm, perinuclear region. Cell junction {ECO:0000250|UniProtKB:P54258}. Note=Shuttles between nucleus and cytoplasm. Colocalizes with FAT1 in the perinuclear area, at cell-cell junctions and leading edges of cells (By similarity). Colocalizes with MTG8 in discrete nuclear dots. Proteolytic fragment F1 appears to remain in nucleus. Fragment F2 is exported into the cytoplasm. Fragment…	NA; Cytosol, Nucleus, nucleoplasm, cytoplasm, perinuclear region of cytoplasm	expression	0	1	0	0	0	IPA	0	0	0	0	Transcriptional corepressor. Recruits NR2E1 to repress transcription. Promotes vascular smooth cell (VSMC) migration and orientation (By similarity). Corepressor of MTG8 transcriptional repression. Has some intrinsic repression activity which is independent of the number of poly-Gln (polyQ) repeats. {ECO:0000250|UniProtKB:O35126, ECO:0000269|PubMed:10085113, ECO:0000269|PubMed:10973986}.	NA	1						specific inhibitor of the cell-cycle kinase CDK2. {ECO:0000250}.	NA	1		Late spermatids: 131.8
ATN1	CENPJ	Nucleus. Cytoplasm, perinuclear region. Cell junction {ECO:0000250|UniProtKB:P54258}. Note=Shuttles between nucleus and cytoplasm. Colocalizes with FAT1 in the perinuclear area, at cell-cell junctions and leading edges of cells (By similarity). Colocalizes with MTG8 in discrete nuclear dots. Proteolytic fragment F1 appears to remain in nucleus. Fragment F2 is exported into the cytoplasm. Fragment…	Cytoplasm, cytoskeleton, microtubule organizing center, centrosome {ECO:0000269|PubMed:11003675, ECO:0000269|PubMed:14654843, ECO:0000269|PubMed:20531387}. Cytoplasm, cytoskeleton, microtubule organizing center, centrosome, centriole {ECO:0000269|PubMed:17681131, ECO:0000269|PubMed:20531387, ECO:0000269|PubMed:22020124}. Note=Localized within the center of microtubule asters (PubMed:11003675). Du…	protein-protein interactions	1	1	0	0	0	IPA	0	0	0	0	Transcriptional corepressor. Recruits NR2E1 to repress transcription. Promotes vascular smooth cell (VSMC) migration and orientation (By similarity). Corepressor of MTG8 transcriptional repression. Has some intrinsic repression activity which is independent of the number of poly-Gln (polyQ) repeats. {ECO:0000250|UniProtKB:O35126, ECO:0000269|PubMed:10085113, ECO:0000269|PubMed:10973986}.	NA	1						Plays an important role in cell division and centrosome function by participating in centriole duplication (PubMed:17681131, PubMed:20531387). Inhibits microtubule nucleation from the centrosome. Involved in the regulation of slow processive growth of centriolar microtubules. Acts as microtubule plus-end tracking protein that stabilizes centriolar microtubules and inhibits microtubule polymerizat…	NA	1	testis: 16.4	Early spermatids: 135.8;Spermatocytes: 63.5
ATN1	CHGB	Nucleus. Cytoplasm, perinuclear region. Cell junction {ECO:0000250|UniProtKB:P54258}. Note=Shuttles between nucleus and cytoplasm. Colocalizes with FAT1 in the perinuclear area, at cell-cell junctions and leading edges of cells (By similarity). Colocalizes with MTG8 in discrete nuclear dots. Proteolytic fragment F1 appears to remain in nucleus. Fragment F2 is exported into the cytoplasm. Fragment…	Secreted. Note=Neuroendocrine and endocrine secretory granules.	expression	0	1	C/S	N	1	IPA	12165555	In mouse, transgenic atrophin-1 [ATN1] protein containing a polyglutamine repeat (65 repeats) is involved in expression of mouse Chromogranin b [Chgb] mRNA in mouse cerebellum.	0	1	Transcriptional corepressor. Recruits NR2E1 to repress transcription. Promotes vascular smooth cell (VSMC) migration and orientation (By similarity). Corepressor of MTG8 transcriptional repression. Has some intrinsic repression activity which is independent of the number of poly-Gln (polyQ) repeats. {ECO:0000250|UniProtKB:O35126, ECO:0000269|PubMed:10085113, ECO:0000269|PubMed:10973986}.	NA	1						Secretogranin-1 is a neuroendocrine secretory granule protein, which may be the precursor for other biologically active peptides.	NA	1	adrenal gland: 3499.0;pituitary gland: 1436.4	Enteroendocrine cells: 1036.1
ATN1	DGCR6L	Nucleus. Cytoplasm, perinuclear region. Cell junction {ECO:0000250|UniProtKB:P54258}. Note=Shuttles between nucleus and cytoplasm. Colocalizes with FAT1 in the perinuclear area, at cell-cell junctions and leading edges of cells (By similarity). Colocalizes with MTG8 in discrete nuclear dots. Proteolytic fragment F1 appears to remain in nucleus. Fragment F2 is exported into the cytoplasm. Fragment…	Nucleus {ECO:0000269|PubMed:15821931}. Note=Predominantly nuclear.	protein-protein interactions	1	1	0	0	0	IPA	0	0	0	0	Transcriptional corepressor. Recruits NR2E1 to repress transcription. Promotes vascular smooth cell (VSMC) migration and orientation (By similarity). Corepressor of MTG8 transcriptional repression. Has some intrinsic repression activity which is independent of the number of poly-Gln (polyQ) repeats. {ECO:0000250|UniProtKB:O35126, ECO:0000269|PubMed:10085113, ECO:0000269|PubMed:10973986}.	NA	1						May play a role in neural crest cell migration into the third and fourth pharyngeal pouches.	NA	1		Late spermatids: 2787.0
ATN1	GTF2H1	Nucleus. Cytoplasm, perinuclear region. Cell junction {ECO:0000250|UniProtKB:P54258}. Note=Shuttles between nucleus and cytoplasm. Colocalizes with FAT1 in the perinuclear area, at cell-cell junctions and leading edges of cells (By similarity). Colocalizes with MTG8 in discrete nuclear dots. Proteolytic fragment F1 appears to remain in nucleus. Fragment F2 is exported into the cytoplasm. Fragment…	Nucleus.	expression	0	1	N	N	1	IPA	12165555	In mouse, transgenic atrophin-1 [ATN1] protein containing a polyglutamine repeat (65 repeats) is involved in expression of mouse Tfiih [Gtf2h1] mRNA in mouse cerebellum. Experiment Type: microarray analysis	0	1	Transcriptional corepressor. Recruits NR2E1 to repress transcription. Promotes vascular smooth cell (VSMC) migration and orientation (By similarity). Corepressor of MTG8 transcriptional repression. Has some intrinsic repression activity which is independent of the number of poly-Gln (polyQ) repeats. {ECO:0000250|UniProtKB:O35126, ECO:0000269|PubMed:10085113, ECO:0000269|PubMed:10973986}.	NA	1						Component of the general transcription and DNA repair factor IIH (TFIIH) core complex, which is involved in general and transcription-coupled nucleotide excision repair (NER) of damaged DNA and, when complexed to CAK, in RNA transcription by RNA polymerase II. In NER, TFIIH acts by opening DNA around the lesion to allow the excision of the damaged oligonucleotide and its replacement by a new DNA …	NA	1
ATN1	IHO1	Nucleus. Cytoplasm, perinuclear region. Cell junction {ECO:0000250|UniProtKB:P54258}. Note=Shuttles between nucleus and cytoplasm. Colocalizes with FAT1 in the perinuclear area, at cell-cell junctions and leading edges of cells (By similarity). Colocalizes with MTG8 in discrete nuclear dots. Proteolytic fragment F1 appears to remain in nucleus. Fragment F2 is exported into the cytoplasm. Fragment…	Chromosome {ECO:0000250|UniProtKB:Q6PDM4}. Note=Specifically localizes to unsynapsed chromosomal regions during meiosis. {ECO:0000250|UniProtKB:Q6PDM4}.	protein-protein interactions	1	1	N	N	1	IPA	32814053	Binding of human ATN1 protein and human IHO1 protein occurs. Experiment Type: two-hybrid array	0	1	Transcriptional corepressor. Recruits NR2E1 to repress transcription. Promotes vascular smooth cell (VSMC) migration and orientation (By similarity). Corepressor of MTG8 transcriptional repression. Has some intrinsic repression activity which is independent of the number of poly-Gln (polyQ) repeats. {ECO:0000250|UniProtKB:O35126, ECO:0000269|PubMed:10085113, ECO:0000269|PubMed:10973986}.	NA	1						Required for DNA double-strand breaks (DSBs) formation in unsynapsed regions during meiotic recombination. Probably acts by forming a complex with MEI4 and REC114, which activates DSBs formation in unsynapsed regions, an essential step to ensure completion of synapsis. Not required for HORMAD1 functions in pairing-independent synaptonemal complex formation, ATR recruitment to unsynapsed axes, mei…	NA	1	testis: 26.7	Adipocytes: 1.7;Cardiomyocytes: 1.4;Fibroblasts: 1.1
ATN1	KANSL1	Nucleus. Cytoplasm, perinuclear region. Cell junction {ECO:0000250|UniProtKB:P54258}. Note=Shuttles between nucleus and cytoplasm. Colocalizes with FAT1 in the perinuclear area, at cell-cell junctions and leading edges of cells (By similarity). Colocalizes with MTG8 in discrete nuclear dots. Proteolytic fragment F1 appears to remain in nucleus. Fragment F2 is exported into the cytoplasm. Fragment…	Nucleus {ECO:0000269|PubMed:20018852}. Nucleus. Chromosome, centromere, kinetochore {ECO:0000269|PubMed:20813266}.	protein-protein interactions	1	1	0	0	0	IPA	24981860	Binding of human ATN1 protein and human KANSL1 protein occurs. Experiment Type: affinity chromatography	0	0	Transcriptional corepressor. Recruits NR2E1 to repress transcription. Promotes vascular smooth cell (VSMC) migration and orientation (By similarity). Corepressor of MTG8 transcriptional repression. Has some intrinsic repression activity which is independent of the number of poly-Gln (polyQ) repeats. {ECO:0000250|UniProtKB:O35126, ECO:0000269|PubMed:10085113, ECO:0000269|PubMed:10973986}.	NA	1						As part of the NSL complex it is involved in acetylation of nucleosomal histone H4 on several lysine residues and therefore may be involved in the regulation of transcription. {ECO:0000269|PubMed:20018852, ECO:0000269|PubMed:22547026}.	NA	1		Excitatory neurons: 334.6;Inhibitory neurons: 326.7;Microglial cells: 327.9;Oligodendrocyte precursor cells: 313.6;Oligodendrocytes: 346.4
ATN1	KAT14	Nucleus. Cytoplasm, perinuclear region. Cell junction {ECO:0000250|UniProtKB:P54258}. Note=Shuttles between nucleus and cytoplasm. Colocalizes with FAT1 in the perinuclear area, at cell-cell junctions and leading edges of cells (By similarity). Colocalizes with MTG8 in discrete nuclear dots. Proteolytic fragment F1 appears to remain in nucleus. Fragment F2 is exported into the cytoplasm. Fragment…	Nucleus. Cytoplasm. Note=Mainly nuclear.	protein-protein interactions	1	1	0	0	0	IPA	0	0	0	0	Transcriptional corepressor. Recruits NR2E1 to repress transcription. Promotes vascular smooth cell (VSMC) migration and orientation (By similarity). Corepressor of MTG8 transcriptional repression. Has some intrinsic repression activity which is independent of the number of poly-Gln (polyQ) repeats. {ECO:0000250|UniProtKB:O35126, ECO:0000269|PubMed:10085113, ECO:0000269|PubMed:10973986}.	NA	1						Component of the ATAC complex, a complex with histone acetyltransferase activity on histones H3 and H4. May function as a scaffold for the ATAC complex to promote ATAC complex stability. Has also weak histone acetyltransferase activity toward histone H4. Required for the normal progression through G1 and G2/M phases of the cell cycle. {ECO:0000269|PubMed:19103755}.	NA	1		Cytotrophoblasts: 17.5;Extravillous trophoblasts: 38.2
ATN1	KCNC3	Nucleus. Cytoplasm, perinuclear region. Cell junction {ECO:0000250|UniProtKB:P54258}. Note=Shuttles between nucleus and cytoplasm. Colocalizes with FAT1 in the perinuclear area, at cell-cell junctions and leading edges of cells (By similarity). Colocalizes with MTG8 in discrete nuclear dots. Proteolytic fragment F1 appears to remain in nucleus. Fragment F2 is exported into the cytoplasm. Fragment…	Cell membrane {ECO:0000269|PubMed:10712820, ECO:0000269|PubMed:16501573, ECO:0000269|PubMed:19953606, ECO:0000269|PubMed:21479265, ECO:0000269|PubMed:22289912, ECO:0000269|PubMed:23734863, ECO:0000269|PubMed:25152487, ECO:0000269|PubMed:25756792, ECO:0000269|PubMed:26997484}; Multi-pass membrane protein {ECO:0000255}. Cell junction, synapse, presynaptic cell membrane {ECO:0000250|UniProtKB:Q63959…	expression	0	1	0	0	0	IPA	0	0	0	0	Transcriptional corepressor. Recruits NR2E1 to repress transcription. Promotes vascular smooth cell (VSMC) migration and orientation (By similarity). Corepressor of MTG8 transcriptional repression. Has some intrinsic repression activity which is independent of the number of poly-Gln (polyQ) repeats. {ECO:0000250|UniProtKB:O35126, ECO:0000269|PubMed:10085113, ECO:0000269|PubMed:10973986}.	NA	1						Voltage-gated potassium channel that plays an important role in the rapid repolarization of fast-firing brain neurons. The channel opens in response to the voltage difference across the membrane, forming a potassium-selective channel through which potassium ions pass in accordance with their electrochemical gradient. The channel displays rapid activation and inactivation kinetics (PubMed:10712820…	NA	1	brain: 74.1;thyroid gland: 52.6	Collecting duct cells: 20.2;Endometrial ciliated cells: 23.9;Excitatory neurons: 15.6;Glandular and luminal cells: 16.3;Inhibitory neurons: 18.3	cerebral cortex: 74.1
ATN1	KMT2C	Nucleus. Cytoplasm, perinuclear region. Cell junction {ECO:0000250|UniProtKB:P54258}. Note=Shuttles between nucleus and cytoplasm. Colocalizes with FAT1 in the perinuclear area, at cell-cell junctions and leading edges of cells (By similarity). Colocalizes with MTG8 in discrete nuclear dots. Proteolytic fragment F1 appears to remain in nucleus. Fragment F2 is exported into the cytoplasm. Fragment…	Nucleus {ECO:0000269|PubMed:23508102}.	protein-protein interactions	1	1	N	N	1	IPA	24981860	Binding of human ATN1 protein and human KMT2C protein occurs. Experiment Type: affinity chromatography	0	1	Transcriptional corepressor. Recruits NR2E1 to repress transcription. Promotes vascular smooth cell (VSMC) migration and orientation (By similarity). Corepressor of MTG8 transcriptional repression. Has some intrinsic repression activity which is independent of the number of poly-Gln (polyQ) repeats. {ECO:0000250|UniProtKB:O35126, ECO:0000269|PubMed:10085113, ECO:0000269|PubMed:10973986}.	NA	1						Histone methyltransferase that catalyzes methyl group transfer from S-adenosyl-L-methionine to the epsilon-amino group of 'Lys-4' of histone H3 (H3K4) (PubMed:25561738). Part of chromatin remodeling machinery predominantly forms H3K4me1 methylation marks at active chromatin sites where transcription and DNA repair take place (PubMed:25561738, PubMed:24081332, PubMed:22266653). Likely plays a redu…	NA	1		Oligodendrocytes: 363.2
ATN1	LTBP1	Nucleus. Cytoplasm, perinuclear region. Cell junction {ECO:0000250|UniProtKB:P54258}. Note=Shuttles between nucleus and cytoplasm. Colocalizes with FAT1 in the perinuclear area, at cell-cell junctions and leading edges of cells (By similarity). Colocalizes with MTG8 in discrete nuclear dots. Proteolytic fragment F1 appears to remain in nucleus. Fragment F2 is exported into the cytoplasm. Fragment…	Secreted {ECO:0000269|PubMed:16157329}. Secreted, extracellular space, extracellular matrix {ECO:0000269|PubMed:16157329, ECO:0000269|PubMed:8617200}.	protein-protein interactions	1	0	0	0	0	IPA	0	0	0	0	Transcriptional corepressor. Recruits NR2E1 to repress transcription. Promotes vascular smooth cell (VSMC) migration and orientation (By similarity). Corepressor of MTG8 transcriptional repression. Has some intrinsic repression activity which is independent of the number of poly-Gln (polyQ) repeats. {ECO:0000250|UniProtKB:O35126, ECO:0000269|PubMed:10085113, ECO:0000269|PubMed:10973986}.	NA	1						Key regulator of transforming growth factor beta (TGFB1, TGFB2 and TGFB3) that controls TGF-beta activation by maintaining it in a latent state during storage in extracellular space (PubMed:2022183, PubMed:8617200, PubMed:8939931). Associates specifically via disulfide bonds with the Latency-associated peptide (LAP), which is the regulatory chain of TGF-beta, and regulates integrin-dependent acti…	NA	1	cervix: 162.8	Astrocytes: 108.4;Fibroblasts: 116.1;Leydig cells: 90.4;Peritubular cells: 161.0;Skeletal myocytes: 85.8
ATN1	MCRS1	Nucleus. Cytoplasm, perinuclear region. Cell junction {ECO:0000250|UniProtKB:P54258}. Note=Shuttles between nucleus and cytoplasm. Colocalizes with FAT1 in the perinuclear area, at cell-cell junctions and leading edges of cells (By similarity). Colocalizes with MTG8 in discrete nuclear dots. Proteolytic fragment F1 appears to remain in nucleus. Fragment F2 is exported into the cytoplasm. Fragment…	Nucleus {ECO:0000269|PubMed:15044100, ECO:0000269|PubMed:16571602, ECO:0000269|PubMed:18922472, ECO:0000269|PubMed:20018852}. Nucleus, nucleolus {ECO:0000269|PubMed:16571602, ECO:0000269|PubMed:9654073}. Cytoplasm {ECO:0000269|PubMed:16571602}. Note=In microspherules in the nucleolus. {ECO:0000269|PubMed:9654073}.	protein-protein interactions	1	1	0	0	0	IPA	0	0	0	0	Transcriptional corepressor. Recruits NR2E1 to repress transcription. Promotes vascular smooth cell (VSMC) migration and orientation (By similarity). Corepressor of MTG8 transcriptional repression. Has some intrinsic repression activity which is independent of the number of poly-Gln (polyQ) repeats. {ECO:0000250|UniProtKB:O35126, ECO:0000269|PubMed:10085113, ECO:0000269|PubMed:10973986}.	NA	1						Modulates the transcription repressor activity of DAXX by recruiting it to the nucleolus (PubMed:11948183). As part of the NSL complex it may be involved in acetylation of nucleosomal histone H4 on several lysine residues (PubMed:20018852). Putative regulatory component of the chromatin remodeling INO80 complex which is involved in transcriptional regulation, DNA replication and probably DNA repa…	NA	1
ATN1	RBFOX1	Nucleus. Cytoplasm, perinuclear region. Cell junction {ECO:0000250|UniProtKB:P54258}. Note=Shuttles between nucleus and cytoplasm. Colocalizes with FAT1 in the perinuclear area, at cell-cell junctions and leading edges of cells (By similarity). Colocalizes with MTG8 in discrete nuclear dots. Proteolytic fragment F1 appears to remain in nucleus. Fragment F2 is exported into the cytoplasm. Fragment…	Nucleus {ECO:0000250}. Cytoplasm {ECO:0000250}.	protein-protein interactions	1	1	0	0	0	IPA	32814053	Binding of human ATN1 protein and human RBFOX1 protein occurs. Experiment Type: yeast two-hybrid mating assay	0	0	Transcriptional corepressor. Recruits NR2E1 to repress transcription. Promotes vascular smooth cell (VSMC) migration and orientation (By similarity). Corepressor of MTG8 transcriptional repression. Has some intrinsic repression activity which is independent of the number of poly-Gln (polyQ) repeats. {ECO:0000250|UniProtKB:O35126, ECO:0000269|PubMed:10085113, ECO:0000269|PubMed:10973986}.	NA	1						RNA-binding protein that regulates alternative splicing events by binding to 5'-UGCAUGU-3' elements. Regulates alternative splicing of tissue-specific exons and of differentially spliced exons during erythropoiesis. {ECO:0000269|PubMed:16537540}.	NA	1	brain: 75.8;skeletal muscle: 96.1;tongue: 45.7	Excitatory neurons: 5800.8;Inhibitory neurons: 5921.8
ATN1	RERE	Nucleus. Cytoplasm, perinuclear region. Cell junction {ECO:0000250|UniProtKB:P54258}. Note=Shuttles between nucleus and cytoplasm. Colocalizes with FAT1 in the perinuclear area, at cell-cell junctions and leading edges of cells (By similarity). Colocalizes with MTG8 in discrete nuclear dots. Proteolytic fragment F1 appears to remain in nucleus. Fragment F2 is exported into the cytoplasm. Fragment…	Nucleus {ECO:0000255|PROSITE-ProRule:PRU00512, ECO:0000255|PROSITE-ProRule:PRU00624, ECO:0000269|PubMed:10814707, ECO:0000269|PubMed:11331249}. Note=Localized in nuclear bodies of variables size. Colocalized with PML and BAX in nuclear PODs.	protein-protein interactions	1	1	N	N	1	IPA	16713569	Binding of human ATN1 protein and human RERE protein occurs. Experiment Type: two-hybrid assay	0	1	Transcriptional corepressor. Recruits NR2E1 to repress transcription. Promotes vascular smooth cell (VSMC) migration and orientation (By similarity). Corepressor of MTG8 transcriptional repression. Has some intrinsic repression activity which is independent of the number of poly-Gln (polyQ) repeats. {ECO:0000250|UniProtKB:O35126, ECO:0000269|PubMed:10085113, ECO:0000269|PubMed:10973986}.	NA	1						Plays a role as a transcriptional repressor during development. May play a role in the control of cell survival. Overexpression of RERE recruits BAX to the nucleus particularly to POD and triggers caspase-3 activation, leading to cell death. {ECO:0000269|PubMed:11331249}.	NA	1		Inhibitory neurons: 373.9;Oligodendrocyte precursor cells: 392.0;Oligodendrocytes: 605.5
ATN1	RNF115	Nucleus. Cytoplasm, perinuclear region. Cell junction {ECO:0000250|UniProtKB:P54258}. Note=Shuttles between nucleus and cytoplasm. Colocalizes with FAT1 in the perinuclear area, at cell-cell junctions and leading edges of cells (By similarity). Colocalizes with MTG8 in discrete nuclear dots. Proteolytic fragment F1 appears to remain in nucleus. Fragment F2 is exported into the cytoplasm. Fragment…	Cytoplasm, cytosol {ECO:0000250|UniProtKB:Q9D0C1}. Note=The GTP-bound form of RAB7A recruits RNF115 from the cytosol onto late endosomes/lysosomes. {ECO:0000250|UniProtKB:Q9D0C1}.	protein-protein interactions	1	1	C	N	1	IPA	22315970	Binding of human ATN1 protein and human RNF115 protein occurs. Experiment Type: two-hybrid assay	0	1	Transcriptional corepressor. Recruits NR2E1 to repress transcription. Promotes vascular smooth cell (VSMC) migration and orientation (By similarity). Corepressor of MTG8 transcriptional repression. Has some intrinsic repression activity which is independent of the number of poly-Gln (polyQ) repeats. {ECO:0000250|UniProtKB:O35126, ECO:0000269|PubMed:10085113, ECO:0000269|PubMed:10973986}.	NA	1						E3 ubiquitin-protein ligase that mediates E2-dependent, 'Lys-48'- and/or 'Lys-63'-linked polyubiquitination of substrates and may play a role in diverse biological processes. Through their polyubiquitination, may play a role in the endosomal trafficking and degradation of membrane receptors including EGFR, FLT3, MET and CXCR4. {ECO:0000269|PubMed:16288031, ECO:0000269|PubMed:18819927, ECO:0000303…	NA	1
ATN1	RNF4	Nucleus. Cytoplasm, perinuclear region. Cell junction {ECO:0000250|UniProtKB:P54258}. Note=Shuttles between nucleus and cytoplasm. Colocalizes with FAT1 in the perinuclear area, at cell-cell junctions and leading edges of cells (By similarity). Colocalizes with MTG8 in discrete nuclear dots. Proteolytic fragment F1 appears to remain in nucleus. Fragment F2 is exported into the cytoplasm. Fragment…	Cytoplasm. Nucleus. Nucleus, PML body. Nucleus, nucleoplasm.	protein-protein interactions	1	1	0	0	0	IPA	0	0	0	0	Transcriptional corepressor. Recruits NR2E1 to repress transcription. Promotes vascular smooth cell (VSMC) migration and orientation (By similarity). Corepressor of MTG8 transcriptional repression. Has some intrinsic repression activity which is independent of the number of poly-Gln (polyQ) repeats. {ECO:0000250|UniProtKB:O35126, ECO:0000269|PubMed:10085113, ECO:0000269|PubMed:10973986}.	NA	1						E3 ubiquitin-protein ligase which binds polysumoylated chains covalently attached to proteins and mediates 'Lys-6'-, 'Lys-11'-, 'Lys-48'- and 'Lys-63'-linked polyubiquitination of those substrates and their subsequent targeting to the proteasome for degradation. Regulates the degradation of several proteins including PML and the transcriptional activator PEA3. Involved in chromosome alignment and…	NA	1
ATN1	RUNX1T1	Nucleus. Cytoplasm, perinuclear region. Cell junction {ECO:0000250|UniProtKB:P54258}. Note=Shuttles between nucleus and cytoplasm. Colocalizes with FAT1 in the perinuclear area, at cell-cell junctions and leading edges of cells (By similarity). Colocalizes with MTG8 in discrete nuclear dots. Proteolytic fragment F1 appears to remain in nucleus. Fragment F2 is exported into the cytoplasm. Fragment…	Nucleus {ECO:0000255|PROSITE-ProRule:PRU00440, ECO:0000269|PubMed:10973986}. Note=Colocalizes with ATN1 in discrete nuclear dots.	localization (activation)	0	1	N	N	1	IPA	10973986	Human ETO [RUNX1T1] protein in cells increases recruitment of ATN1 protein in nuclear matrix.	0	1	Transcriptional corepressor. Recruits NR2E1 to repress transcription. Promotes vascular smooth cell (VSMC) migration and orientation (By similarity). Corepressor of MTG8 transcriptional repression. Has some intrinsic repression activity which is independent of the number of poly-Gln (polyQ) repeats. {ECO:0000250|UniProtKB:O35126, ECO:0000269|PubMed:10085113, ECO:0000269|PubMed:10973986}.	NA	1						Transcriptional corepressor which facilitates transcriptional repression via its association with DNA-binding transcription factors and recruitment of other corepressors and histone-modifying enzymes (PubMed:12559562, PubMed:15203199, PubMed:10688654). Can repress the expression of MMP7 in a ZBTB33-dependent manner (PubMed:23251453). Can repress transactivation mediated by TCF12 (PubMed:16803958)…	NA	1	brain: 93.3	Bipolar cells: 142.1;Excitatory neurons: 196.9;Hepatic stellate cells: 124.2;Inhibitory neurons: 326.3;Oligodendrocyte precursor cells: 262.4	cerebellum: 93.3;pons: 29.6
ATN1	RUNX1T1	Nucleus. Cytoplasm, perinuclear region. Cell junction {ECO:0000250|UniProtKB:P54258}. Note=Shuttles between nucleus and cytoplasm. Colocalizes with FAT1 in the perinuclear area, at cell-cell junctions and leading edges of cells (By similarity). Colocalizes with MTG8 in discrete nuclear dots. Proteolytic fragment F1 appears to remain in nucleus. Fragment F2 is exported into the cytoplasm. Fragment…	Nucleus {ECO:0000255|PROSITE-ProRule:PRU00440, ECO:0000269|PubMed:10973986}. Note=Colocalizes with ATN1 in discrete nuclear dots.	protein-protein interactions	1	1	0	0	0	IPA	32296183;10973986	Binding of human ATN1 protein and human RUNX1T1 protein occurs. Experiment Type: two-hybrid assay	0	1	Transcriptional corepressor. Recruits NR2E1 to repress transcription. Promotes vascular smooth cell (VSMC) migration and orientation (By similarity). Corepressor of MTG8 transcriptional repression. Has some intrinsic repression activity which is independent of the number of poly-Gln (polyQ) repeats. {ECO:0000250|UniProtKB:O35126, ECO:0000269|PubMed:10085113, ECO:0000269|PubMed:10973986}.	NA	1						Transcriptional corepressor which facilitates transcriptional repression via its association with DNA-binding transcription factors and recruitment of other corepressors and histone-modifying enzymes (PubMed:12559562, PubMed:15203199, PubMed:10688654). Can repress the expression of MMP7 in a ZBTB33-dependent manner (PubMed:23251453). Can repress transactivation mediated by TCF12 (PubMed:16803958)…	NA	1	brain: 93.3	Bipolar cells: 142.1;Excitatory neurons: 196.9;Hepatic stellate cells: 124.2;Inhibitory neurons: 326.3;Oligodendrocyte precursor cells: 262.4	cerebellum: 93.3;pons: 29.6
ATN1	TADA3	Nucleus. Cytoplasm, perinuclear region. Cell junction {ECO:0000250|UniProtKB:P54258}. Note=Shuttles between nucleus and cytoplasm. Colocalizes with FAT1 in the perinuclear area, at cell-cell junctions and leading edges of cells (By similarity). Colocalizes with MTG8 in discrete nuclear dots. Proteolytic fragment F1 appears to remain in nucleus. Fragment F2 is exported into the cytoplasm. Fragment…	Nucleus {ECO:0000269|PubMed:11564863, ECO:0000269|PubMed:9674425}.	protein-protein interactions	1	1	0	0	0	IPA	0	0	0	0	Transcriptional corepressor. Recruits NR2E1 to repress transcription. Promotes vascular smooth cell (VSMC) migration and orientation (By similarity). Corepressor of MTG8 transcriptional repression. Has some intrinsic repression activity which is independent of the number of poly-Gln (polyQ) repeats. {ECO:0000250|UniProtKB:O35126, ECO:0000269|PubMed:10085113, ECO:0000269|PubMed:10973986}.	NA	1						Functions as a component of the PCAF complex. The PCAF complex is capable of efficiently acetylating histones in a nucleosomal context. The PCAF complex could be considered as the human version of the yeast SAGA complex. Also known as a coactivator for p53/TP53-dependent transcriptional activation. Component of the ATAC complex, a complex with histone acetyltransferase activity on histones H3 and…	NA	1
ATN1	TRIP6	Nucleus. Cytoplasm, perinuclear region. Cell junction {ECO:0000250|UniProtKB:P54258}. Note=Shuttles between nucleus and cytoplasm. Colocalizes with FAT1 in the perinuclear area, at cell-cell junctions and leading edges of cells (By similarity). Colocalizes with MTG8 in discrete nuclear dots. Proteolytic fragment F1 appears to remain in nucleus. Fragment F2 is exported into the cytoplasm. Fragment…	Cytoplasm, cytoskeleton {ECO:0000269|PubMed:16624523}. Cell junction, focal adhesion {ECO:0000269|PubMed:16624523}. Nucleus {ECO:0000269|PubMed:10826496, ECO:0000269|PubMed:16624523}. Cytoplasm {ECO:0000269|PubMed:16624523}. Note=Shuttles between nucleus and cytoplasm (PubMed:16624523). Colocalizes with actin (PubMed:10826496). {ECO:0000269|PubMed:10826496, ECO:0000269|PubMed:16624523}.	protein-protein interactions	1	1	0	0	0	IPA	0	0	0	0	Transcriptional corepressor. Recruits NR2E1 to repress transcription. Promotes vascular smooth cell (VSMC) migration and orientation (By similarity). Corepressor of MTG8 transcriptional repression. Has some intrinsic repression activity which is independent of the number of poly-Gln (polyQ) repeats. {ECO:0000250|UniProtKB:O35126, ECO:0000269|PubMed:10085113, ECO:0000269|PubMed:10973986}.	NA	1						Relays signals from the cell surface to the nucleus to weaken adherens junction and promote actin cytoskeleton reorganization and cell invasiveness. Involved in lysophosphatidic acid-induced cell adhesion and migration. Acts as a transcriptional coactivator for NF-kappa-B and JUN, and mediates the transrepression of these transcription factors induced by glucocorticoid receptor. {ECO:0000269|PubM…	NA	1
ATN1	WWOX	Nucleus. Cytoplasm, perinuclear region. Cell junction {ECO:0000250|UniProtKB:P54258}. Note=Shuttles between nucleus and cytoplasm. Colocalizes with FAT1 in the perinuclear area, at cell-cell junctions and leading edges of cells (By similarity). Colocalizes with MTG8 in discrete nuclear dots. Proteolytic fragment F1 appears to remain in nucleus. Fragment F2 is exported into the cytoplasm. Fragment…	Cytoplasm {ECO:0000269|PubMed:14695174, ECO:0000269|PubMed:15070730, ECO:0000269|PubMed:16219768, ECO:0000269|PubMed:19366691, ECO:0000269|PubMed:19465938}. Nucleus {ECO:0000269|PubMed:14695174, ECO:0000269|PubMed:15064722, ECO:0000269|PubMed:16219768, ECO:0000269|PubMed:19366691}. Mitochondrion {ECO:0000269|PubMed:14695174}. Golgi apparatus {ECO:0000305}. Note=Partially localizes to the mitochon…	protein-protein interactions	1	1	0	0	0	IPA	0	0	0	0	Transcriptional corepressor. Recruits NR2E1 to repress transcription. Promotes vascular smooth cell (VSMC) migration and orientation (By similarity). Corepressor of MTG8 transcriptional repression. Has some intrinsic repression activity which is independent of the number of poly-Gln (polyQ) repeats. {ECO:0000250|UniProtKB:O35126, ECO:0000269|PubMed:10085113, ECO:0000269|PubMed:10973986}.	NA	1						Putative oxidoreductase. Acts as a tumor suppressor and plays a role in apoptosis. Required for normal bone development (By similarity). May function synergistically with p53/TP53 to control genotoxic stress-induced cell death. Plays a role in TGFB1 signaling and TGFB1-mediated cell death. May also play a role in tumor necrosis factor (TNF)-mediated cell death. Inhibits Wnt signaling, probably by…	NA	1		Astrocytes: 927.8;Excitatory neurons: 270.5;Inhibitory neurons: 540.9;Microglial cells: 471.2;Oligodendrocyte precursor cells: 914.9;Oligodendrocytes: 793.5
ATP5IF1	GLE1	Mitochondrion {ECO:0000269|PubMed:12110673}.	Nucleus {ECO:0000269|PubMed:12668658}. Cytoplasm {ECO:0000269|PubMed:12668658}. Note=Shuttles between the nucleus and the cytoplasm (PubMed:12668658). Shuttling is essential for its mRNA export function (PubMed:12668658). {ECO:0000269|PubMed:12668658}.; [Isoform 1]: Cytoplasm {ECO:0000269|PubMed:12668658}. Nucleus, nuclear pore complex {ECO:0000269|PubMed:12668658}. Note=Shuttles between the nucl…	protein-protein interactions	1	0	0	0	0	IPA	0	0	0	0	Endogenous F(1)F(o)-ATPase inhibitor limiting ATP depletion when the mitochondrial membrane potential falls below a threshold and the F(1)F(o)-ATP synthase starts hydrolyzing ATP to pump protons out of the mitochondrial matrix. Required to avoid the consumption of cellular ATP when the F(1)F(o)-ATP synthase enzyme acts as an ATP hydrolase. Indirectly acts as a regulator of heme synthesis in eryth…	NA	1		Distal tubular cells: 1035.0;Endometrial ciliated cells: 1524.2;Exocrine glandular cells: 672.1;Granulosa cells: 1030.6;Proximal tubular cells: 1502.7				Required for the export of mRNAs containing poly(A) tails from the nucleus into the cytoplasm. May be involved in the terminal step of the mRNA transport through the nuclear pore complex (NPC). {ECO:0000269|PubMed:12668658, ECO:0000269|PubMed:16000379, ECO:0000269|PubMed:9618489}.	NA	1		Early spermatids: 77.0;Late spermatids: 58.1;Spermatocytes: 51.3
ATP5IF1	LRPPRC	Mitochondrion {ECO:0000269|PubMed:12110673}.	Mitochondrion. Nucleus, nucleoplasm. Nucleus inner membrane. Nucleus outer membrane. Note=Seems to be predominantly mitochondrial.	expression	1	1	MC	N	0	IPA	30204502	Human LRPPRC protein decreases expression of human IF1 [ATP5IF1] protein in hek293t cells. Experiment Type: Western blotting	0	0	Endogenous F(1)F(o)-ATPase inhibitor limiting ATP depletion when the mitochondrial membrane potential falls below a threshold and the F(1)F(o)-ATP synthase starts hydrolyzing ATP to pump protons out of the mitochondrial matrix. Required to avoid the consumption of cellular ATP when the F(1)F(o)-ATP synthase enzyme acts as an ATP hydrolase. Indirectly acts as a regulator of heme synthesis in eryth…	NA	1		Distal tubular cells: 1035.0;Endometrial ciliated cells: 1524.2;Exocrine glandular cells: 672.1;Granulosa cells: 1030.6;Proximal tubular cells: 1502.7				May play a role in RNA metabolism in both nuclei and mitochondria. In the nucleus binds to HNRPA1-associated poly(A) mRNAs and is part of nmRNP complexes at late stages of mRNA maturation which are possibly associated with nuclear mRNA export. May bind mature mRNA in the nucleus outer membrane. In mitochondria binds to poly(A) mRNA. Plays a role in translation or stability of mitochondrially enco…	NA	1
ATP5IF1	LRPPRC	Mitochondrion {ECO:0000269|PubMed:12110673}.	Mitochondrion. Nucleus, nucleoplasm. Nucleus inner membrane. Nucleus outer membrane. Note=Seems to be predominantly mitochondrial.	protein-protein interactions	1	1	MC	N	1	IPA	32877691	Binding of human ATP5IF1 protein and human LRPPRC protein occurs.	0	0	Endogenous F(1)F(o)-ATPase inhibitor limiting ATP depletion when the mitochondrial membrane potential falls below a threshold and the F(1)F(o)-ATP synthase starts hydrolyzing ATP to pump protons out of the mitochondrial matrix. Required to avoid the consumption of cellular ATP when the F(1)F(o)-ATP synthase enzyme acts as an ATP hydrolase. Indirectly acts as a regulator of heme synthesis in eryth…	NA	1		Distal tubular cells: 1035.0;Endometrial ciliated cells: 1524.2;Exocrine glandular cells: 672.1;Granulosa cells: 1030.6;Proximal tubular cells: 1502.7				May play a role in RNA metabolism in both nuclei and mitochondria. In the nucleus binds to HNRPA1-associated poly(A) mRNAs and is part of nmRNP complexes at late stages of mRNA maturation which are possibly associated with nuclear mRNA export. May bind mature mRNA in the nucleus outer membrane. In mitochondria binds to poly(A) mRNA. Plays a role in translation or stability of mitochondrially enco…	NA	1
ATP5IF1	MTIF3	Mitochondrion {ECO:0000269|PubMed:12110673}.	Mitochondrion {ECO:0000305}.	protein-protein interactions	1	1	MC	N	0	IPA	32877691	Binding of human ATP5IF1 protein and human MTIF3 protein occurs.	0	0	Endogenous F(1)F(o)-ATPase inhibitor limiting ATP depletion when the mitochondrial membrane potential falls below a threshold and the F(1)F(o)-ATP synthase starts hydrolyzing ATP to pump protons out of the mitochondrial matrix. Required to avoid the consumption of cellular ATP when the F(1)F(o)-ATP synthase enzyme acts as an ATP hydrolase. Indirectly acts as a regulator of heme synthesis in eryth…	NA	1		Distal tubular cells: 1035.0;Endometrial ciliated cells: 1524.2;Exocrine glandular cells: 672.1;Granulosa cells: 1030.6;Proximal tubular cells: 1502.7				IF-3 binds to the 28S ribosomal subunit and shifts the equilibrum between 55S ribosomes and their 39S and 28S subunits in favor of the free subunits, thus enhancing the availability of 28S subunits on which protein synthesis initiation begins. {ECO:0000269|PubMed:12095986}.	NA	1		Early spermatids: 610.0;Proximal tubular cells: 475.5
ATP5IF1	PARK7	Mitochondrion {ECO:0000269|PubMed:12110673}.	Cell membrane {ECO:0000250|UniProtKB:Q99LX0}; Lipid-anchor {ECO:0000250|UniProtKB:Q99LX0}. Cytoplasm {ECO:0000269|PubMed:12851414, ECO:0000269|PubMed:14579415, ECO:0000269|PubMed:15976810, ECO:0000269|PubMed:19229105, ECO:0000269|PubMed:28596309}. Nucleus {ECO:0000269|PubMed:12851414, ECO:0000269|PubMed:14579415, ECO:0000269|PubMed:15976810, ECO:0000269|PubMed:16390825, ECO:0000269|PubMed:2859630…	protein-protein interactions	1	1	MC	N	0	IPA	24981860	Binding of human ATP5IF1 protein and human PARK7 protein occurs. Experiment Type: affinity chromatography	0	0	Endogenous F(1)F(o)-ATPase inhibitor limiting ATP depletion when the mitochondrial membrane potential falls below a threshold and the F(1)F(o)-ATP synthase starts hydrolyzing ATP to pump protons out of the mitochondrial matrix. Required to avoid the consumption of cellular ATP when the F(1)F(o)-ATP synthase enzyme acts as an ATP hydrolase. Indirectly acts as a regulator of heme synthesis in eryth…	NA	1		Distal tubular cells: 1035.0;Endometrial ciliated cells: 1524.2;Exocrine glandular cells: 672.1;Granulosa cells: 1030.6;Proximal tubular cells: 1502.7				Multifunctional protein with controversial molecular function which plays an important role in cell protection against oxidative stress and cell death acting as oxidative stress sensor and redox-sensitive chaperone and protease (PubMed:17015834, PubMed:20304780, PubMed:18711745, PubMed:12796482, PubMed:19229105, PubMed:25416785, PubMed:26995087, PubMed:28993701). It is involved in neuroprotective…	COFACTOR: Note=Deglycase activity does not require glutathione as a cofactor, however, glycated glutathione constitutes a PARK7 substrate. {ECO:0000269|PubMed:25416785, ECO:0000269|PubMed:28993701};	1
ATP5IF1	RPS21	Mitochondrion {ECO:0000269|PubMed:12110673}.	Cytoplasm, cytosol {ECO:0000269|PubMed:25957688}. Cytoplasm {ECO:0000305|PubMed:23636399, ECO:0000305|PubMed:25901680}. Rough endoplasmic reticulum {ECO:0000250|UniProtKB:P63221}. Note=Detected on cytosolic polysomes (PubMed:25957688). Detected in ribosomes that are associated with the rough endoplasmic reticulum (By similarity). {ECO:0000250|UniProtKB:P63221, ECO:0000269|PubMed:25957688}.	protein-protein interactions	1	0	0	0	0	IPA	0	0	0	0	Endogenous F(1)F(o)-ATPase inhibitor limiting ATP depletion when the mitochondrial membrane potential falls below a threshold and the F(1)F(o)-ATP synthase starts hydrolyzing ATP to pump protons out of the mitochondrial matrix. Required to avoid the consumption of cellular ATP when the F(1)F(o)-ATP synthase enzyme acts as an ATP hydrolase. Indirectly acts as a regulator of heme synthesis in eryth…	NA	1		Distal tubular cells: 1035.0;Endometrial ciliated cells: 1524.2;Exocrine glandular cells: 672.1;Granulosa cells: 1030.6;Proximal tubular cells: 1502.7				NA; Ribosomes, the organelles that catalyze protein synthesis, consist of a small 40S subunit and a large 60S subunit. Together these subunits are composed of 4 RNA species and approximately 80 structurally distinct proteins. This gene encodes a ribosomal protein that is a component of the 40S subunit. The protein belongs to the S21E family of ribosomal proteins. It is located in the cytoplasm. A…	NA	1
ATP5IF1	TEAD2	Mitochondrion {ECO:0000269|PubMed:12110673}.	Nucleus.	expression	0	1	0	0	0	IPA	32488939	In mouse skeletal muscle, transgenic mutant human ATPIF1 [ATP5IF1] protein (substitution p.H49K) increases expression of mouse ETF [Tead2] protein in skeletal muscle from mouse hindlimb. Experiment Type: iTRAQ labeling	0	0	Endogenous F(1)F(o)-ATPase inhibitor limiting ATP depletion when the mitochondrial membrane potential falls below a threshold and the F(1)F(o)-ATP synthase starts hydrolyzing ATP to pump protons out of the mitochondrial matrix. Required to avoid the consumption of cellular ATP when the F(1)F(o)-ATP synthase enzyme acts as an ATP hydrolase. Indirectly acts as a regulator of heme synthesis in eryth…	NA	1		Distal tubular cells: 1035.0;Endometrial ciliated cells: 1524.2;Exocrine glandular cells: 672.1;Granulosa cells: 1030.6;Proximal tubular cells: 1502.7				Transcription factor which plays a key role in the Hippo signaling pathway, a pathway involved in organ size control and tumor suppression by restricting proliferation and promoting apoptosis. The core of this pathway is composed of a kinase cascade wherein MST1/MST2, in complex with its regulatory protein SAV1, phosphorylates and activates LATS1/2 in complex with its regulatory protein MOB1, whi…	NA	1		Ductal cells: 51.1;Early spermatids: 76.6
ATP5IF1	TNIP2	Mitochondrion {ECO:0000269|PubMed:12110673}.	Cytoplasm {ECO:0000269|PubMed:12595760}. Nucleus {ECO:0000305}.	protein-protein interactions	1	0	0	0	0	IPA	0	0	0	0	Endogenous F(1)F(o)-ATPase inhibitor limiting ATP depletion when the mitochondrial membrane potential falls below a threshold and the F(1)F(o)-ATP synthase starts hydrolyzing ATP to pump protons out of the mitochondrial matrix. Required to avoid the consumption of cellular ATP when the F(1)F(o)-ATP synthase enzyme acts as an ATP hydrolase. Indirectly acts as a regulator of heme synthesis in eryth…	NA	1		Distal tubular cells: 1035.0;Endometrial ciliated cells: 1524.2;Exocrine glandular cells: 672.1;Granulosa cells: 1030.6;Proximal tubular cells: 1502.7				Inhibits NF-kappa-B activation by blocking the interaction of RIPK1 with its downstream effector NEMO/IKBKG. Forms a ternary complex with NFKB1 and MAP3K8 but appears to function upstream of MAP3K8 in the TLR4 signaling pathway that regulates MAP3K8 activation. Involved in activation of the MEK/ERK signaling pathway during innate immune response; this function seems to be stimulus- and cell type …	NA	1		Proximal enterocytes: 174.3
ATP5IF1	TOR1A	Mitochondrion {ECO:0000269|PubMed:12110673}.	Endoplasmic reticulum lumen {ECO:0000269|PubMed:29053766}. Nucleus membrane {ECO:0000269|PubMed:14970196, ECO:0000269|PubMed:29053766}; Peripheral membrane protein {ECO:0000305}. Cell projection, growth cone {ECO:0000250}. Cytoplasmic vesicle membrane {ECO:0000250}. Cytoplasmic vesicle, secretory vesicle {ECO:0000250}. Cytoplasmic vesicle, secretory vesicle, synaptic vesicle. Cytoplasm, cytoskele…	protein-protein interactions	1	0	0	0	0	IPA	0	0	0	0	Endogenous F(1)F(o)-ATPase inhibitor limiting ATP depletion when the mitochondrial membrane potential falls below a threshold and the F(1)F(o)-ATP synthase starts hydrolyzing ATP to pump protons out of the mitochondrial matrix. Required to avoid the consumption of cellular ATP when the F(1)F(o)-ATP synthase enzyme acts as an ATP hydrolase. Indirectly acts as a regulator of heme synthesis in eryth…	NA	1		Distal tubular cells: 1035.0;Endometrial ciliated cells: 1524.2;Exocrine glandular cells: 672.1;Granulosa cells: 1030.6;Proximal tubular cells: 1502.7				Protein with chaperone functions important for the control of protein folding, processing, stability and localization as well as for the reduction of misfolded protein aggregates. Involved in the regulation of synaptic vesicle recycling, controls STON2 protein stability in collaboration with the COP9 signalosome complex (CSN). In the nucleus, may link the cytoskeleton with the nuclear envelope, t…	NA	1
BAG5	TUBA1C	NA; Cytosol, Mitochondrion, Nucleus, cytoplasm, inclusion body, membrane, perinuclear region of cytoplasm	Cytoplasm, cytoskeleton.	protein-protein interactions	1	1	C	N, presynaptic	1	IPA	32850835	Binding of human BAG5 protein and human TUBA1C protein occurs. Experiment Type: affinity chromatography	0	1	Inhibits both auto-ubiquitination of PRKN and ubiquitination of target proteins by PRKN (By similarity). May function as a nucleotide exchange factor for HSP/HSP70, promoting ADP release, and activating Hsp70-mediated refolding. {ECO:0000250, ECO:0000269|PubMed:20223214}.	NA	1	testis: 128.8	Early spermatids: 1734.2;Late spermatids: 1796.9				Tubulin is the major constituent of microtubules. It binds two moles of GTP, one at an exchangeable site on the beta chain and one at a non-exchangeable site on the alpha chain.	NA	1	esophagus: 483.3	Extravillous trophoblasts: 1118.2
BAG5	ZNHIT3	NA; Cytosol, Mitochondrion, Nucleus, cytoplasm, inclusion body, membrane, perinuclear region of cytoplasm	Cytoplasm {ECO:0000269|PubMed:28335020}. Nucleus {ECO:0000269|PubMed:28335020}.	protein-protein interactions	1	0	0	0	0	IPA	26496610	Association of human AHNAK protein and human BAG5 protein and human CEP192 protein and human COPE protein and mouse Erp44 protein and human GRHL1 protein and human MEN1 protein and human MRPL43 protein and human PPP2R2A protein and human FAM192A [PSME3IP1] protein and human SNRPG protein and human ZNF292 protein and human ZNHIT3 protein occurs. Experiment Type: anti tag coimmunoprecipitation	0	1	Inhibits both auto-ubiquitination of PRKN and ubiquitination of target proteins by PRKN (By similarity). May function as a nucleotide exchange factor for HSP/HSP70, promoting ADP release, and activating Hsp70-mediated refolding. {ECO:0000250, ECO:0000269|PubMed:20223214}.	NA	1	testis: 128.8	Early spermatids: 1734.2;Late spermatids: 1796.9				NA	NA	1		Early spermatids: 222.2
BAG5	ARF3	NA; Cytosol, Mitochondrion, Nucleus, cytoplasm, inclusion body, membrane, perinuclear region of cytoplasm	Golgi apparatus {ECO:0000269|PubMed:17555535}. Cytoplasm, perinuclear region {ECO:0000269|PubMed:17555535}.	protein-protein interactions	0	1	C	N	1	IPA	32850835	Binding of human ARF3 protein and human BAG5 protein occurs.	0	1	Inhibits both auto-ubiquitination of PRKN and ubiquitination of target proteins by PRKN (By similarity). May function as a nucleotide exchange factor for HSP/HSP70, promoting ADP release, and activating Hsp70-mediated refolding. {ECO:0000250, ECO:0000269|PubMed:20223214}.	NA	1	testis: 128.8	Early spermatids: 1734.2;Late spermatids: 1796.9				GTP-binding protein that functions as an allosteric activator of the cholera toxin catalytic subunit, an ADP-ribosyltransferase. Involved in protein trafficking; may modulate vesicle budding and uncoating within the Golgi apparatus.	NA	1
BAG5	COL8A1	NA; Cytosol, Mitochondrion, Nucleus, cytoplasm, inclusion body, membrane, perinuclear region of cytoplasm	Secreted, extracellular space, extracellular matrix, basement membrane.	protein-protein interactions	1	0	0	0	0	IPA	0	0	0	1	Inhibits both auto-ubiquitination of PRKN and ubiquitination of target proteins by PRKN (By similarity). May function as a nucleotide exchange factor for HSP/HSP70, promoting ADP release, and activating Hsp70-mediated refolding. {ECO:0000250, ECO:0000269|PubMed:20223214}.	NA	1	testis: 128.8	Early spermatids: 1734.2;Late spermatids: 1796.9				Macromolecular component of the subendothelium. Major component of the Descemet's membrane (basement membrane) of corneal endothelial cells. Also component of the endothelia of blood vessels. Necessary for migration and proliferation of vascular smooth muscle cells and thus, has a potential role in the maintenance of vessel wall integrity and structure, in particular in atherogenesis. {ECO:000026…	NA	1		Alveolar cells type 1: 246.8;Fibroblasts: 53.3;Hepatic stellate cells: 102.8;Smooth muscle cells: 51.6	hypothalamus: 26.3
BAG5	DNAJB7	NA; Cytosol, Mitochondrion, Nucleus, cytoplasm, inclusion body, membrane, perinuclear region of cytoplasm	NA; nucleus, cytoplasm	protein-protein interactions	1	1	0	0	0	IPA	0	0	0	0	Inhibits both auto-ubiquitination of PRKN and ubiquitination of target proteins by PRKN (By similarity). May function as a nucleotide exchange factor for HSP/HSP70, promoting ADP release, and activating Hsp70-mediated refolding. {ECO:0000250, ECO:0000269|PubMed:20223214}.	NA	1	testis: 128.8	Early spermatids: 1734.2;Late spermatids: 1796.9				Probably acts as a co-chaperone. {ECO:0000250}.	NA	1	testis: 10.4	Early spermatids: 553.5
BAG5	DNAJC13	NA; Cytosol, Mitochondrion, Nucleus, cytoplasm, inclusion body, membrane, perinuclear region of cytoplasm	Early endosome {ECO:0000269|PubMed:18256511}. Early endosome membrane {ECO:0000305}; Peripheral membrane protein {ECO:0000269|PubMed:18256511}. Endosome membrane {ECO:0000269|PubMed:24643499}.	protein-protein interactions	1	1	C/EN	N, presynaptic	1	IPA	33961781;32850835;26186194	Binding of human BAG5 protein and human DNAJC13 protein occurs. Experiment Type: affinity chromatography	0	1	Inhibits both auto-ubiquitination of PRKN and ubiquitination of target proteins by PRKN (By similarity). May function as a nucleotide exchange factor for HSP/HSP70, promoting ADP release, and activating Hsp70-mediated refolding. {ECO:0000250, ECO:0000269|PubMed:20223214}.	NA	1	testis: 128.8	Early spermatids: 1734.2;Late spermatids: 1796.9				Involved in membrane trafficking through early endosomes, such as the early endosome to recycling endosome transport implicated in the recycling of transferrin and the early endosome to late endosome transport implicated in degradation of EGF and EGFR (PubMed:18256511, PubMed:18307993). Involved in the regulation of endosomal membrane tubulation and regulates th dynamics of SNX1 on the endosomal …	NA	1
BAG5	DNAJC18	NA; Cytosol, Mitochondrion, Nucleus, cytoplasm, inclusion body, membrane, perinuclear region of cytoplasm	Membrane {ECO:0000305}; Single-pass membrane protein {ECO:0000305}.	protein-protein interactions	1	1	C/CM	N	1	IPA	33957083	Binding of human BAG5 protein and human DNAJC18 protein occurs. Experiment Type: affinity chromatography	0	1	Inhibits both auto-ubiquitination of PRKN and ubiquitination of target proteins by PRKN (By similarity). May function as a nucleotide exchange factor for HSP/HSP70, promoting ADP release, and activating Hsp70-mediated refolding. {ECO:0000250, ECO:0000269|PubMed:20223214}.	NA	1	testis: 128.8	Early spermatids: 1734.2;Late spermatids: 1796.9				NA	NA	1	testis: 78.5	Early spermatids: 529.9;Late spermatids: 1332.4
BAG5	EDC4	NA; Cytosol, Mitochondrion, Nucleus, cytoplasm, inclusion body, membrane, perinuclear region of cytoplasm	Cytoplasm, P-body {ECO:0000269|PubMed:16364915, ECO:0000269|PubMed:9067524}. Nucleus {ECO:0000269|PubMed:7520377}.	protein-protein interactions	1	1	C	N	1	IPA	32850835	Binding of human BAG5 protein and human EDC4 protein occurs. Experiment Type: affinity chromatography	0	1	Inhibits both auto-ubiquitination of PRKN and ubiquitination of target proteins by PRKN (By similarity). May function as a nucleotide exchange factor for HSP/HSP70, promoting ADP release, and activating Hsp70-mediated refolding. {ECO:0000250, ECO:0000269|PubMed:20223214}.	NA	1	testis: 128.8	Early spermatids: 1734.2;Late spermatids: 1796.9				In the process of mRNA degradation, seems to play a role in mRNA decapping. Component of a complex containing DCP2 and DCP1A which functions in decapping of ARE-containing mRNAs. Promotes complex formation between DCP1A and DCP2. Enhances the catalytic activity of DCP2 (in vitro). {ECO:0000269|PubMed:16364915}.	NA	1		Alveolar cells type 1: 22.4;Alveolar cells type 2: 24.8;Excitatory neurons: 14.2;Gastric mucus-secreting cells: 15.3;Inhibitory neurons: 12.6;Oligodendrocytes: 13.6
BAG5	EEF2	NA; Cytosol, Mitochondrion, Nucleus, cytoplasm, inclusion body, membrane, perinuclear region of cytoplasm	Cytoplasm {ECO:0000269|PubMed:25064856}. Nucleus {ECO:0000269|PubMed:24648518}. Note=Phosphorylation by CSK promotes cleavage and SUMOylation-dependent nuclear translocation of the C-terminal cleavage product. {ECO:0000269|PubMed:24648518}.	protein-protein interactions	1	1	0	0	0	IPA	0	0	0	0	Inhibits both auto-ubiquitination of PRKN and ubiquitination of target proteins by PRKN (By similarity). May function as a nucleotide exchange factor for HSP/HSP70, promoting ADP release, and activating Hsp70-mediated refolding. {ECO:0000250, ECO:0000269|PubMed:20223214}.	NA	1	testis: 128.8	Early spermatids: 1734.2;Late spermatids: 1796.9				Catalyzes the GTP-dependent ribosomal translocation step during translation elongation. During this step, the ribosome changes from the pre-translocational (PRE) to the post-translocational (POST) state as the newly formed A-site-bound peptidyl-tRNA and P-site-bound deacylated tRNA move to the P and E sites, respectively. Catalyzes the coordinated movement of the two tRNA molecules, the mRNA and …	NA	1
BAG5	EGFR	NA; Cytosol, Mitochondrion, Nucleus, cytoplasm, inclusion body, membrane, perinuclear region of cytoplasm	Cell membrane {ECO:0000269|PubMed:17182860, ECO:0000269|PubMed:20462955, ECO:0000269|PubMed:23589287, ECO:0000269|PubMed:27153536, ECO:0000269|PubMed:2790960}; Single-pass type I membrane protein {ECO:0000269|PubMed:27153536}. Endoplasmic reticulum membrane {ECO:0000269|PubMed:27153536}; Single-pass type I membrane protein. Golgi apparatus membrane; Single-pass type I membrane protein. Nucleus me…	protein-protein interactions	1	1	0	0	0	IPA	0	0	0	0	Inhibits both auto-ubiquitination of PRKN and ubiquitination of target proteins by PRKN (By similarity). May function as a nucleotide exchange factor for HSP/HSP70, promoting ADP release, and activating Hsp70-mediated refolding. {ECO:0000250, ECO:0000269|PubMed:20223214}.	NA	1	testis: 128.8	Early spermatids: 1734.2;Late spermatids: 1796.9				Receptor tyrosine kinase binding ligands of the EGF family and activating several signaling cascades to convert extracellular cues into appropriate cellular responses (PubMed:2790960, PubMed:10805725, PubMed:27153536). Known ligands include EGF, TGFA/TGF-alpha, AREG, epigen/EPGN, BTC/betacellulin, epiregulin/EREG and HBEGF/heparin-binding EGF (PubMed:2790960, PubMed:7679104, PubMed:8144591, PubMe…	NA	1	placenta: 68.5	Cytotrophoblasts: 287.9;Skeletal myocytes: 251.2;Syncytiotrophoblasts: 376.8
BAG5	FHL2	NA; Cytosol, Mitochondrion, Nucleus, cytoplasm, inclusion body, membrane, perinuclear region of cytoplasm	Cytoplasm {ECO:0000269|PubMed:11813260, ECO:0000269|PubMed:16652157}. Nucleus {ECO:0000269|PubMed:11813260, ECO:0000269|PubMed:16652157}. Cytoplasm, myofibril, sarcomere, Z line {ECO:0000250|UniProtKB:O35115}.	protein-protein interactions	1	1	0	0	0	IPA	0	0	0	0	Inhibits both auto-ubiquitination of PRKN and ubiquitination of target proteins by PRKN (By similarity). May function as a nucleotide exchange factor for HSP/HSP70, promoting ADP release, and activating Hsp70-mediated refolding. {ECO:0000250, ECO:0000269|PubMed:20223214}.	NA	1	testis: 128.8	Early spermatids: 1734.2;Late spermatids: 1796.9				May function as a molecular transmitter linking various signaling pathways to transcriptional regulation. Negatively regulates the transcriptional repressor E4F1 and may function in cell growth. Inhibits the transcriptional activity of FOXO1 and its apoptotic function by enhancing the interaction of FOXO1 with SIRT1 and FOXO1 deacetylation. Negatively regulates the calcineurin/NFAT signaling path…	NA	1	heart muscle: 851.4;ovary: 540.2	Basal prostatic cells: 1077.5;Extravillous trophoblasts: 585.9;Granulosa cells: 851.4;Leydig cells: 567.0;Peritubular cells: 1049.0
[truncated: 5,436 more rows]

## Sheet: Notes
Columns: 'Source_Molecule' and 'Target_Molecule' - color coding refers to the colors used in the TD landscape figure (Figure 1).
	TD prioritized candidate genes that (a) are present in at least two independent main genetic lists (studies/analyses) or where a genetic finding had corroborating evidence in epigenetic or transcriptomic studies (requiring evidence from two independent blood studies or one brain study), (b) genes that are expressed in brain (tissues) based on the data in HPA, and (c) genes that are protein-coding.
	TD candidate genes
[truncated: 9 more rows]
